# Supplementary material
Source: PubMed Central journal article supplement (PMC2579752)

**Supplemental Figure S1. Representative spectra of peptides containing pTyr sites readily identified in both nontransformed and Src-transformed cells.**

Src pY418

R.LIEDNEY@TAR.Q

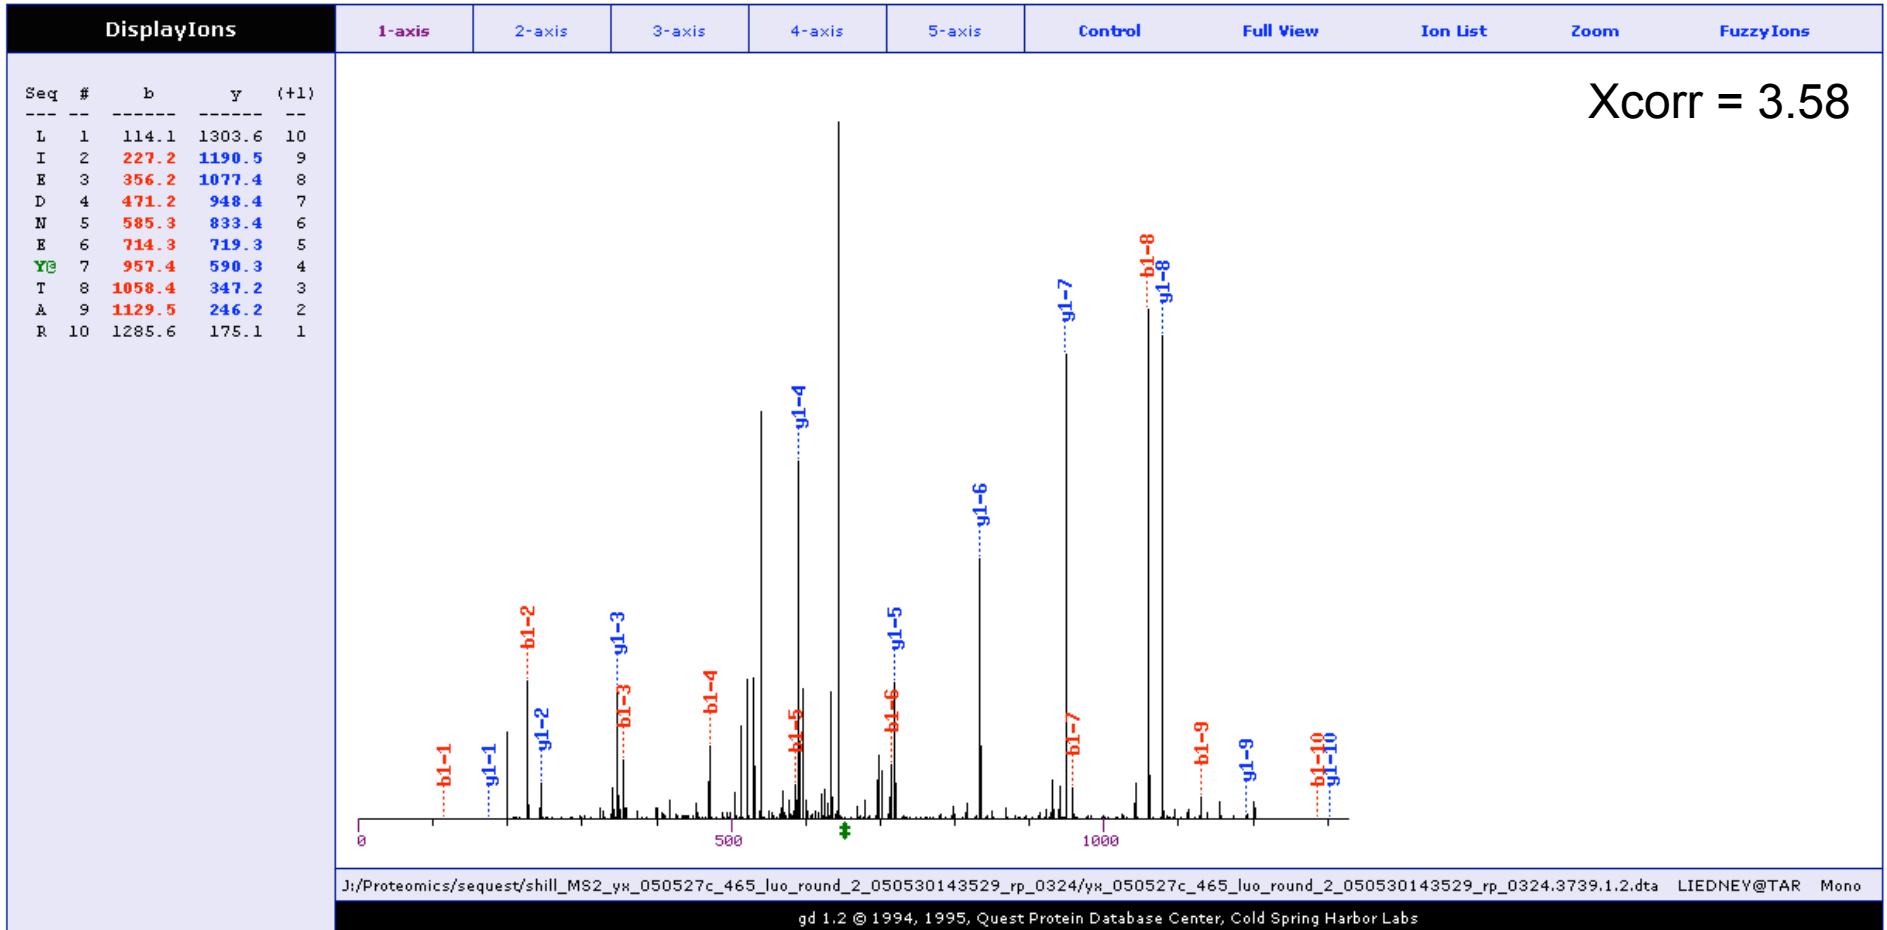

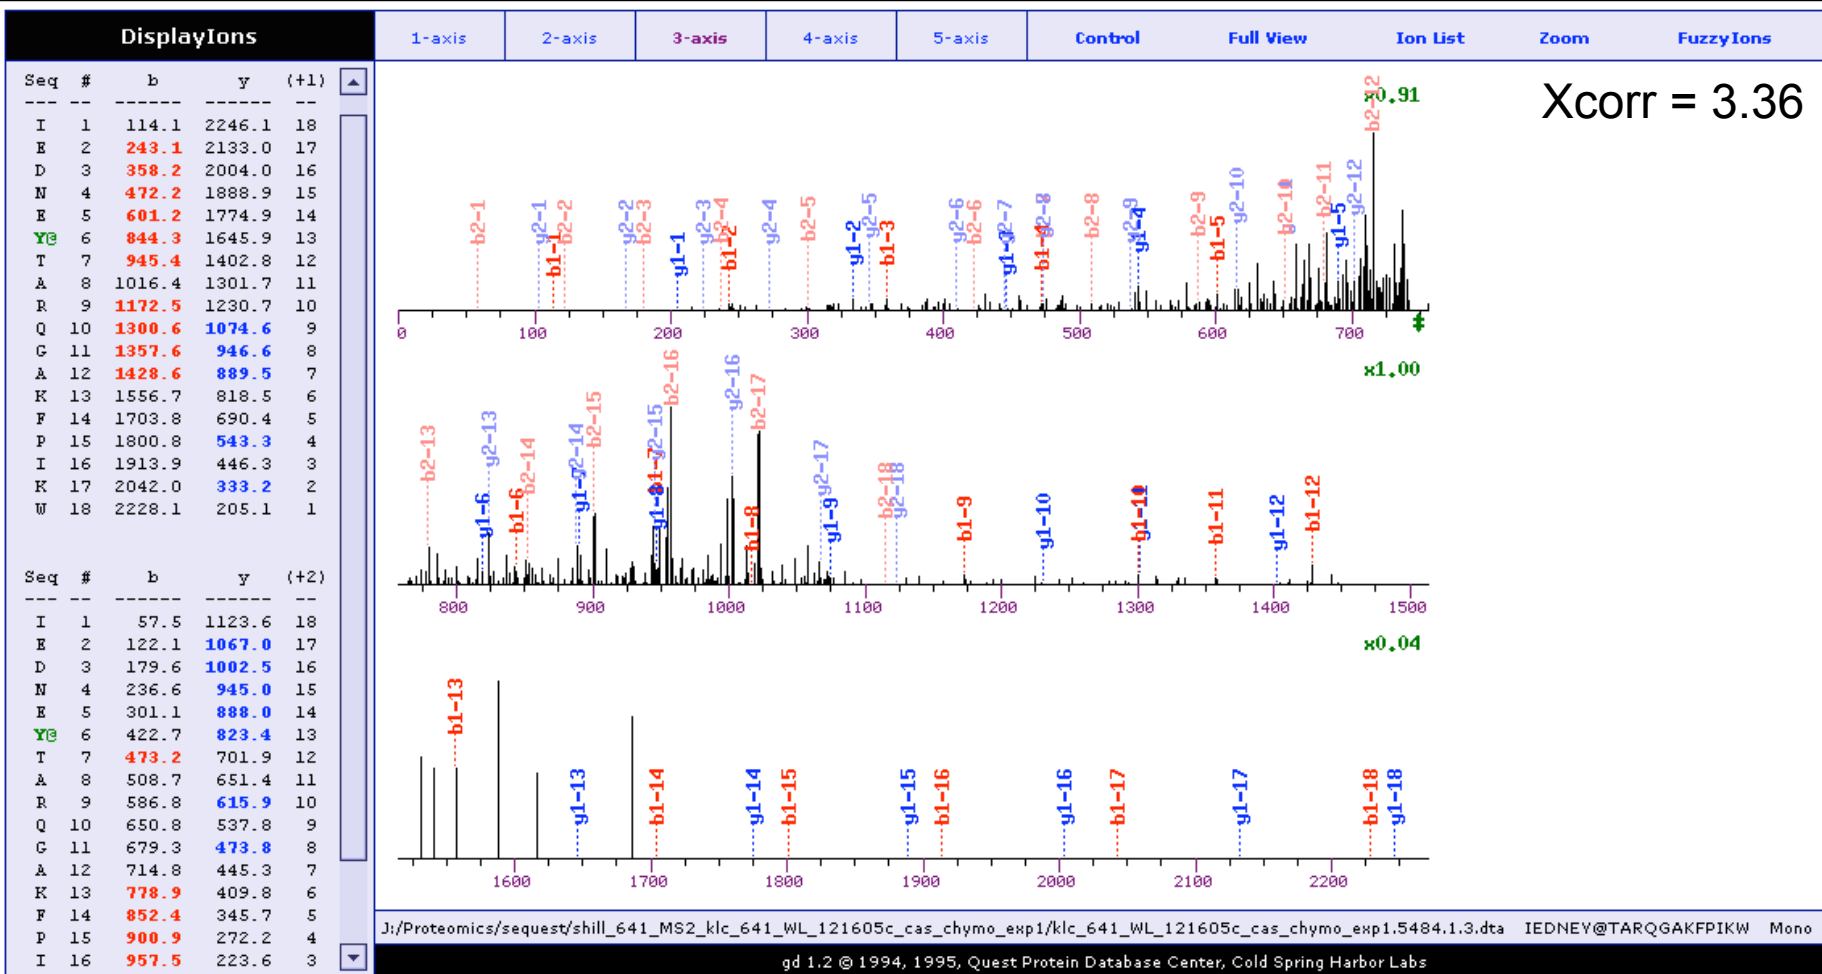

FAK pY577 R.YMEDSTYY@K.A

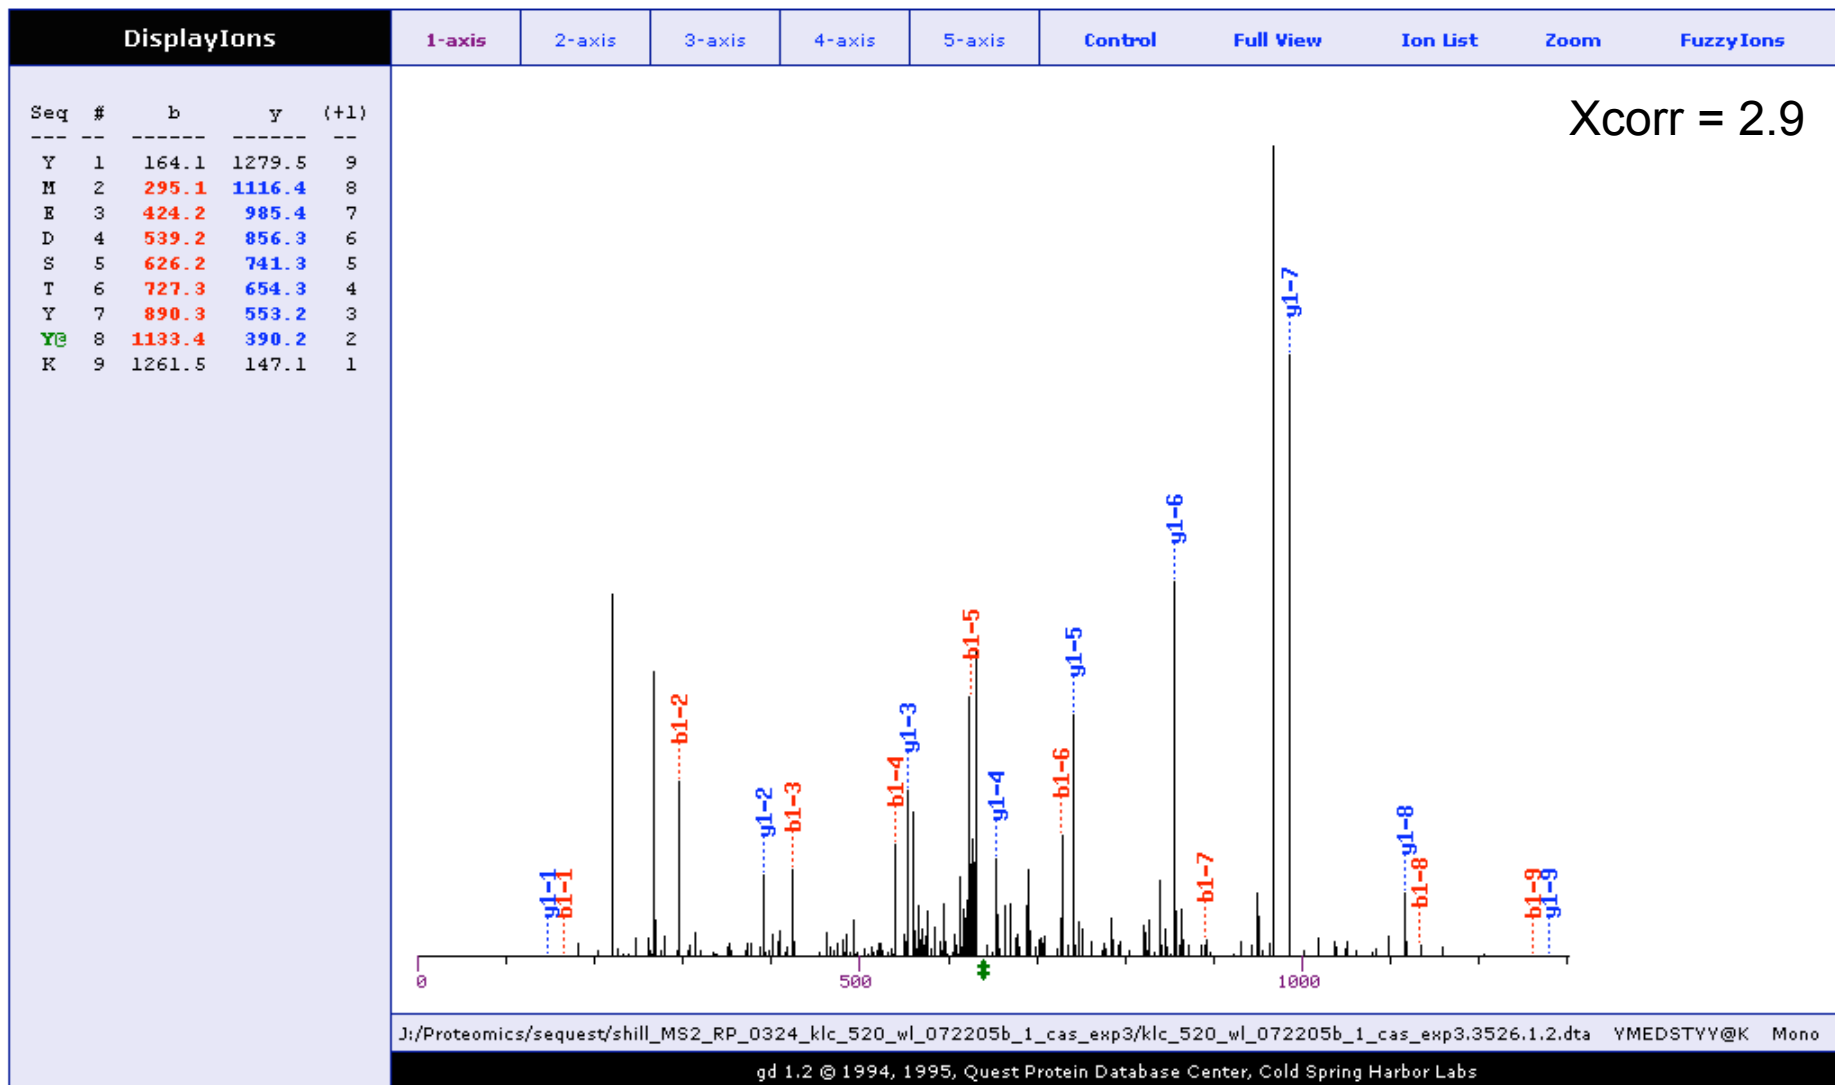

FAK pY576 R.YMEDSTY@YKASK.G

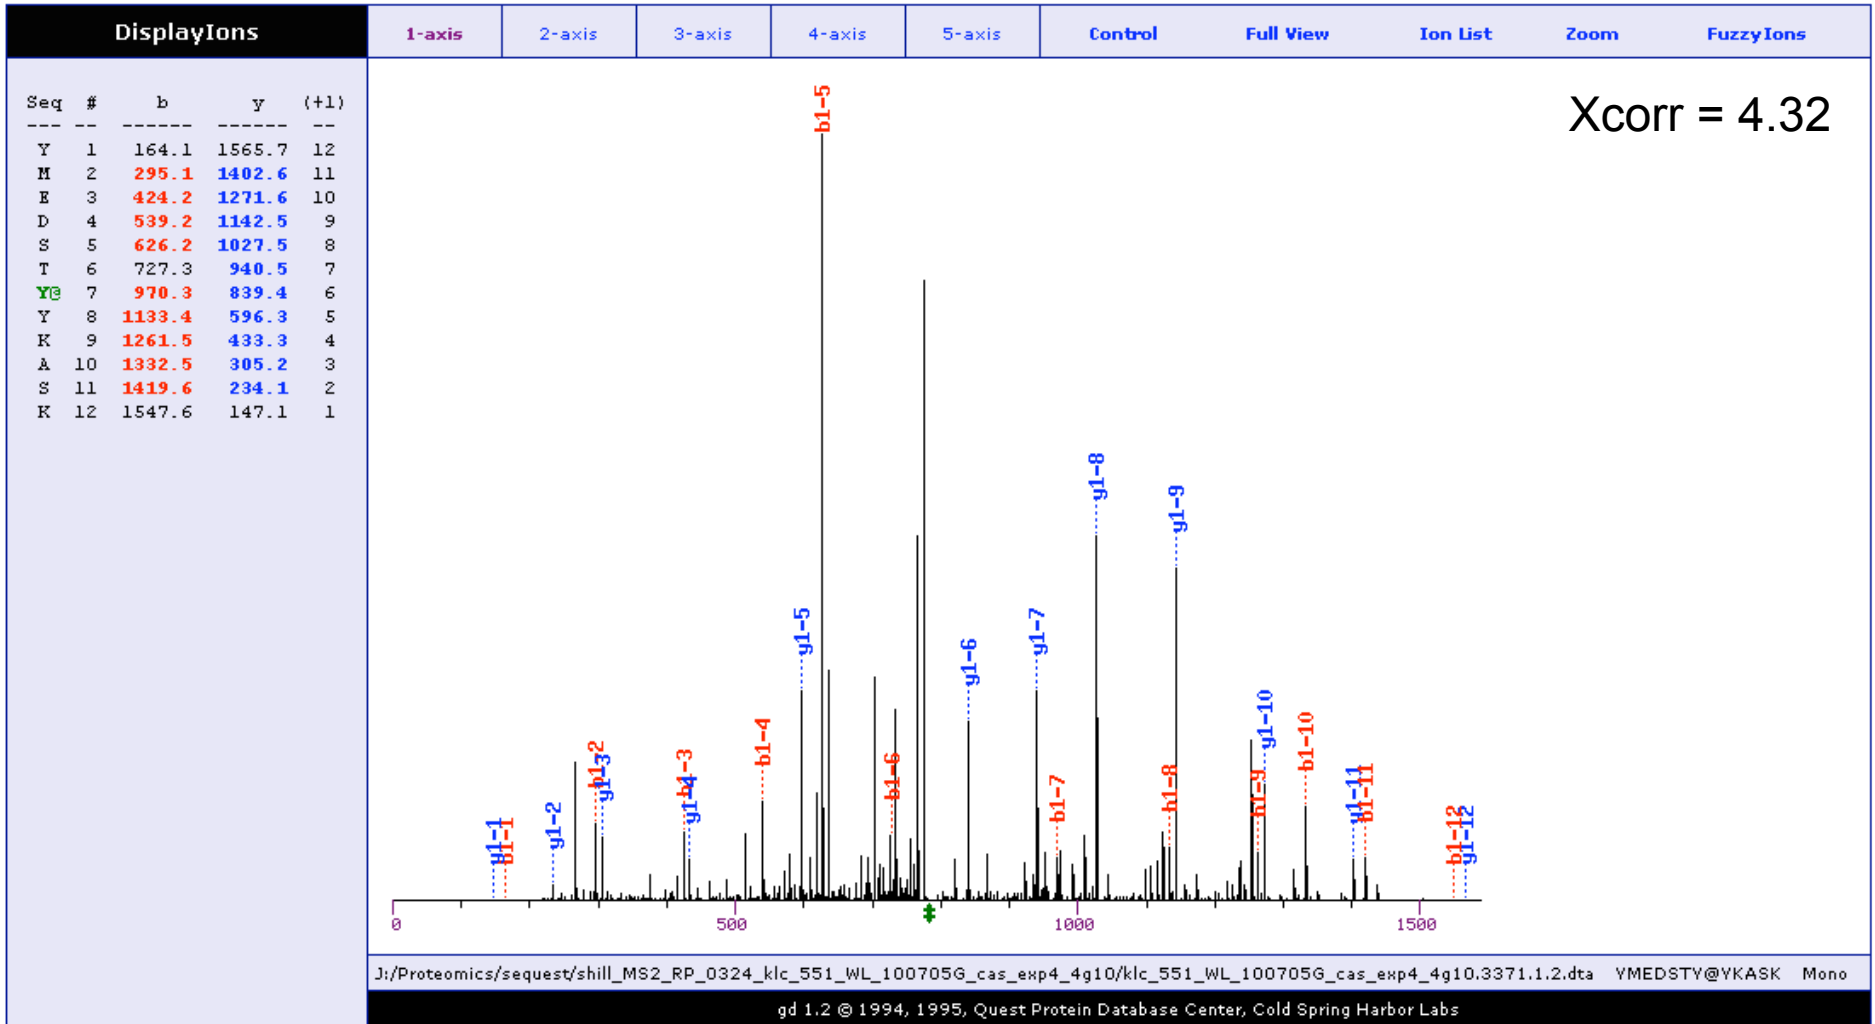

# FAK pY576 R.YMEDSTY@YK.A

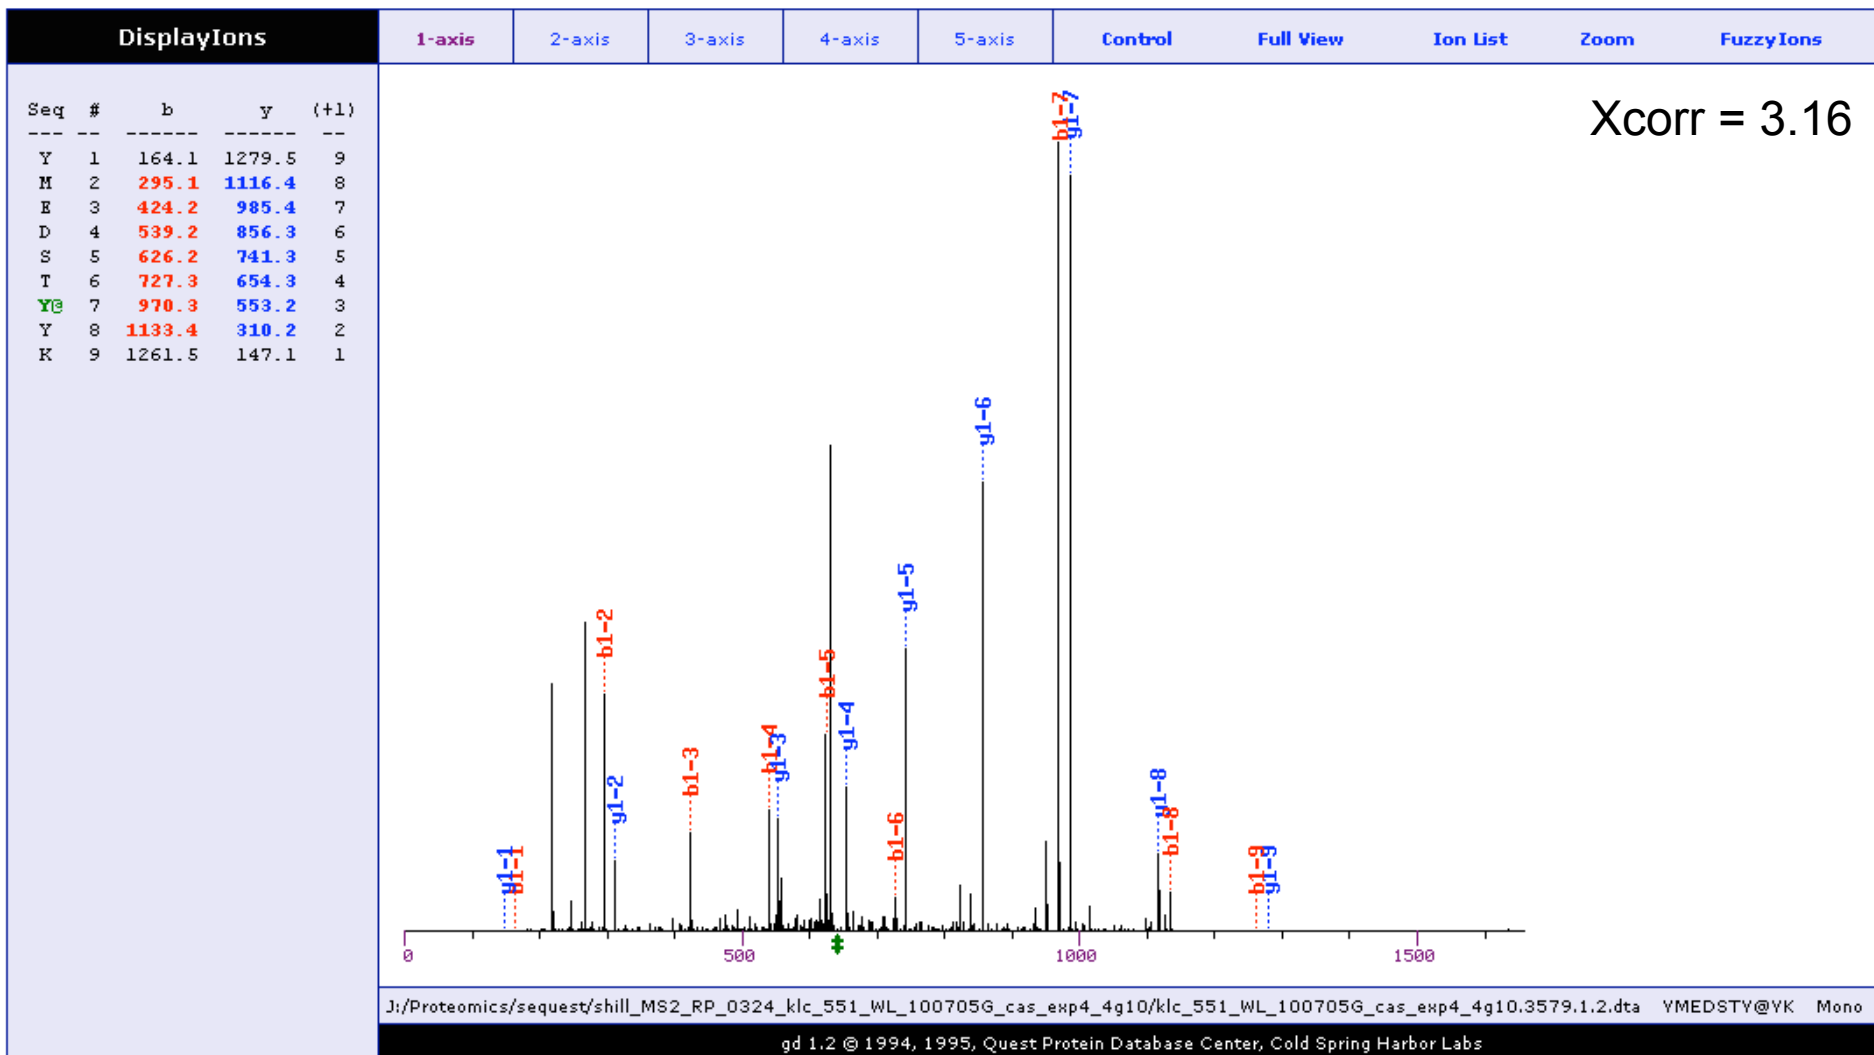

FAK pY576/pY577 R.YMEDSTY@Y@KASK.G

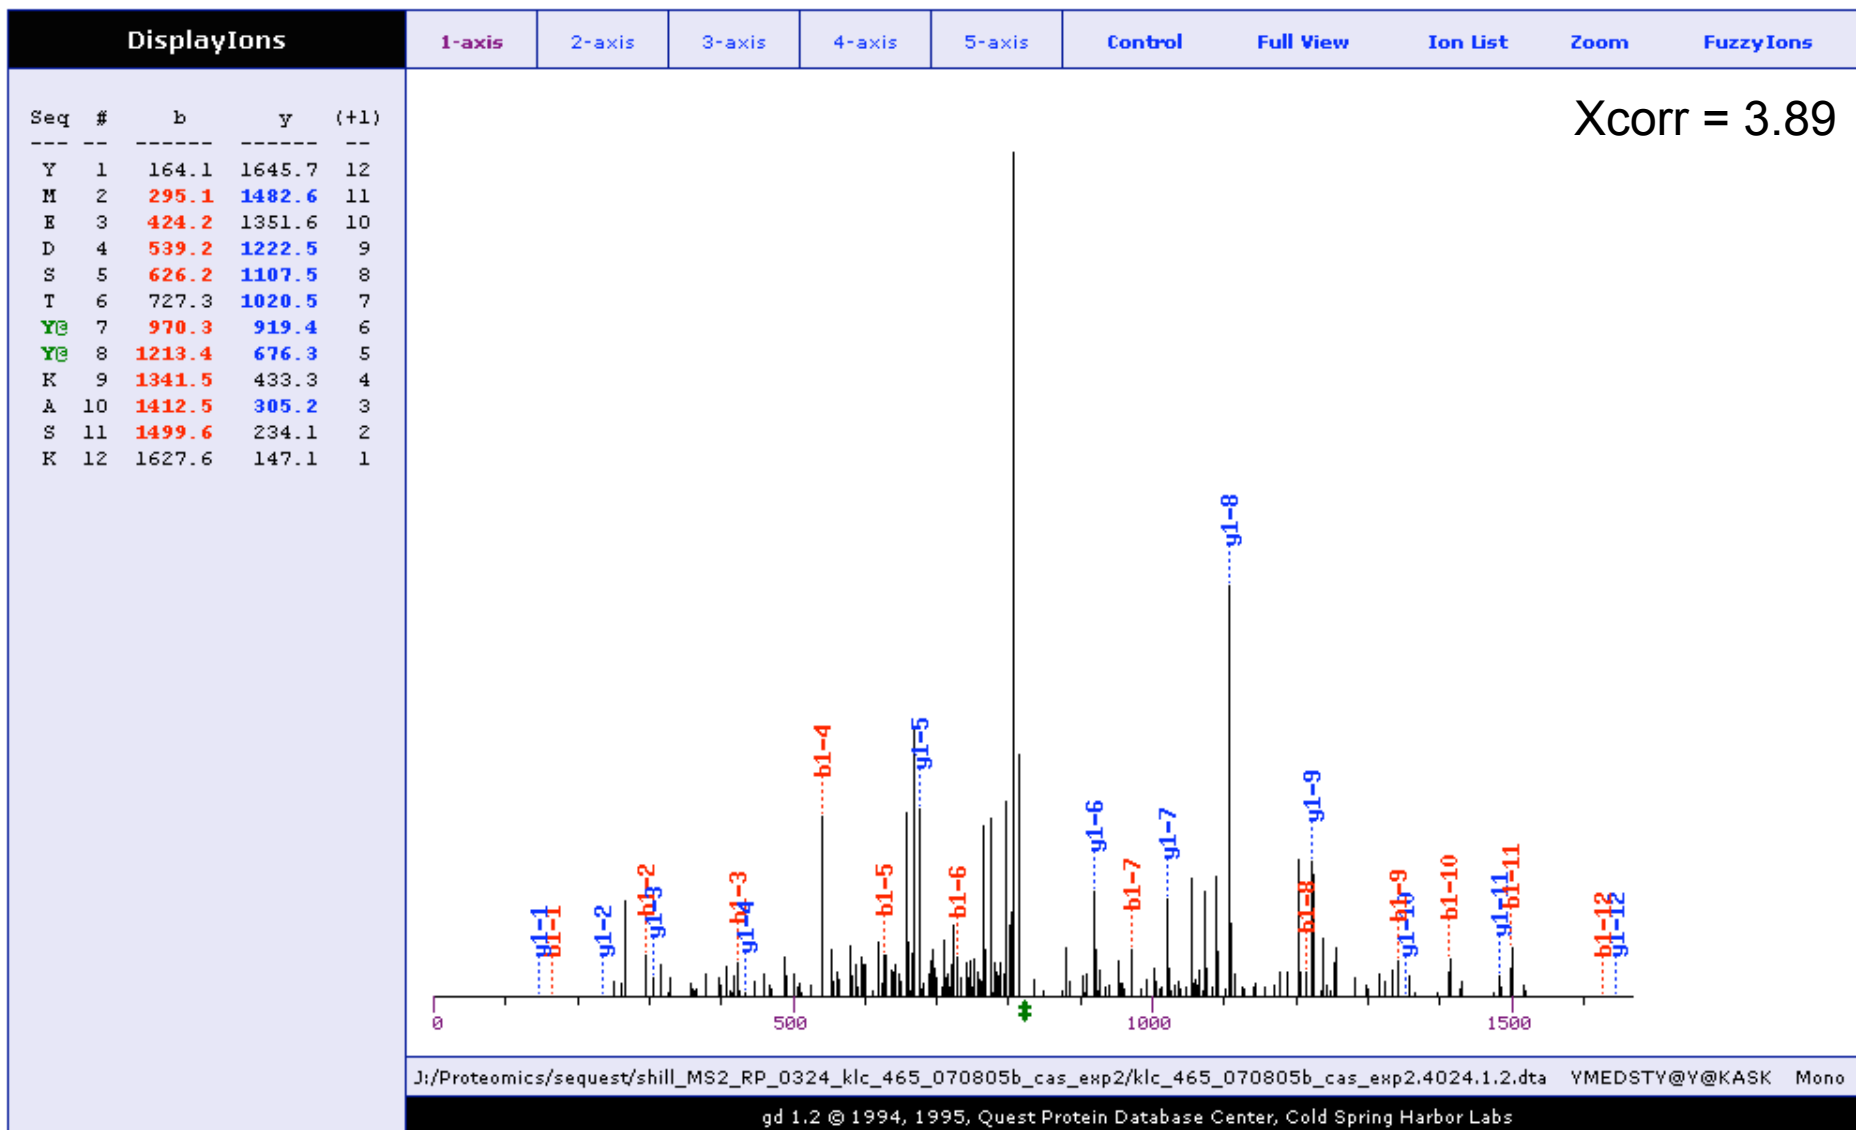

# FAK pY576/pY577 R.YMEDSTY@Y@K.A

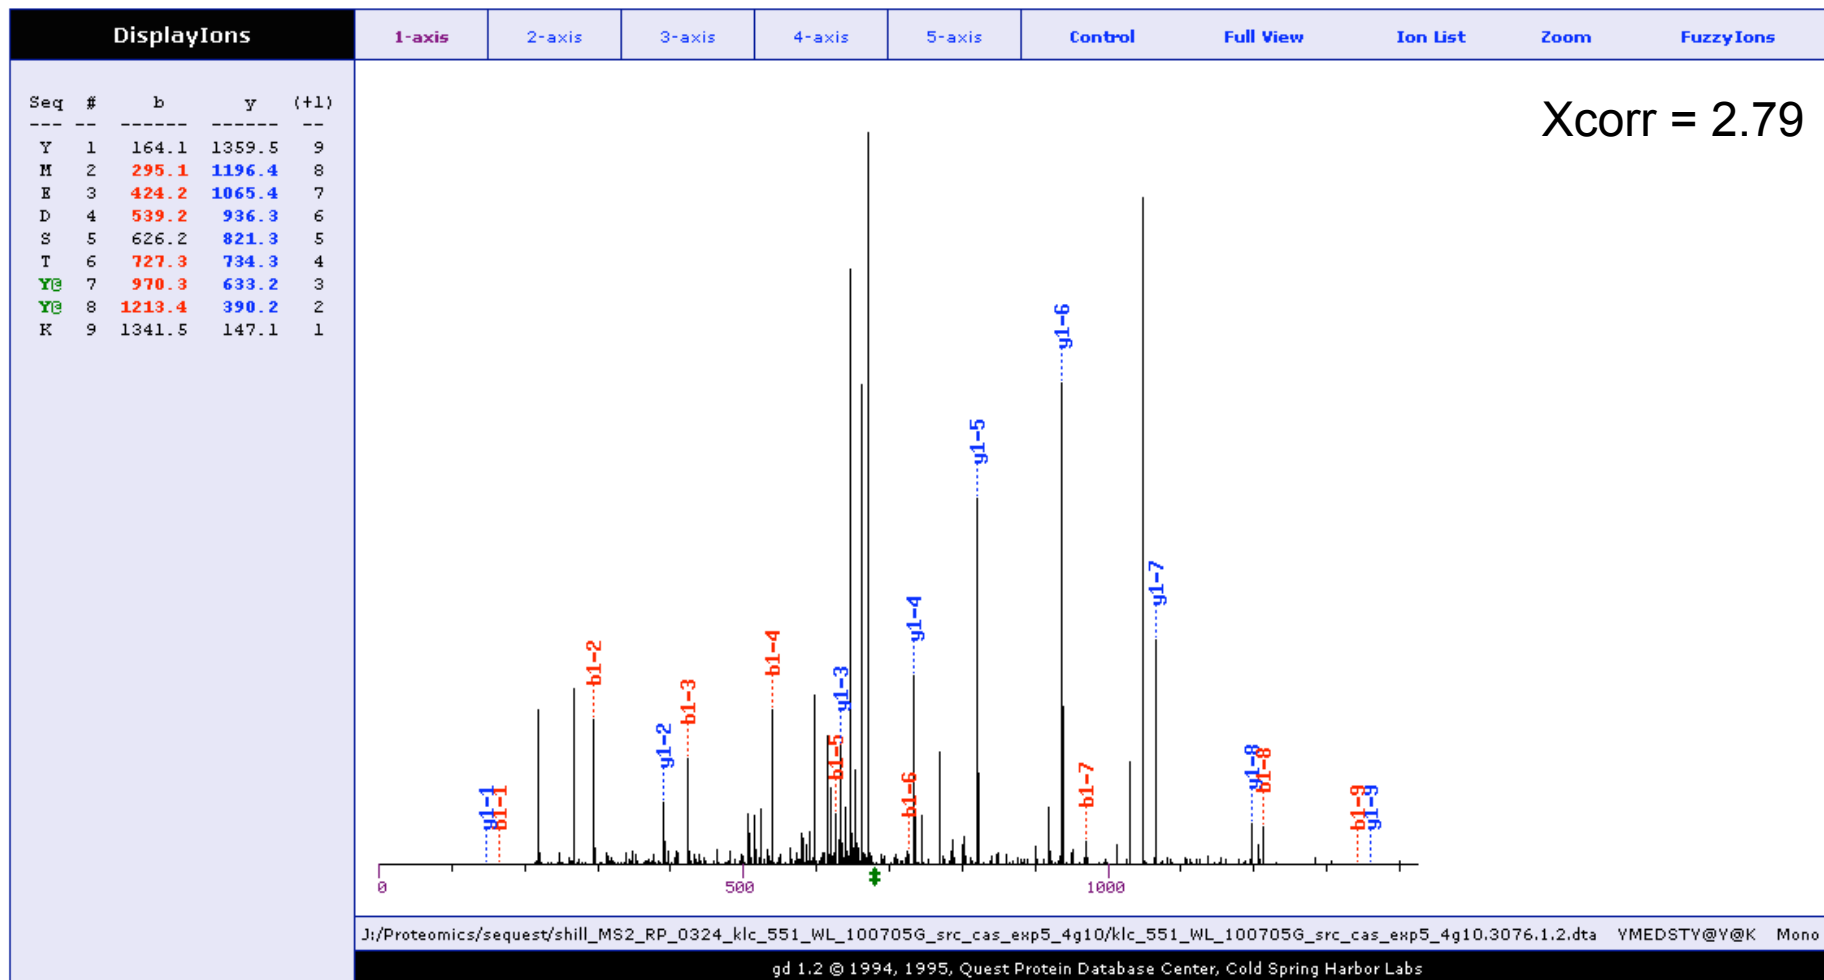



# FAK pY576 R.YM#EDSTYY@K.A

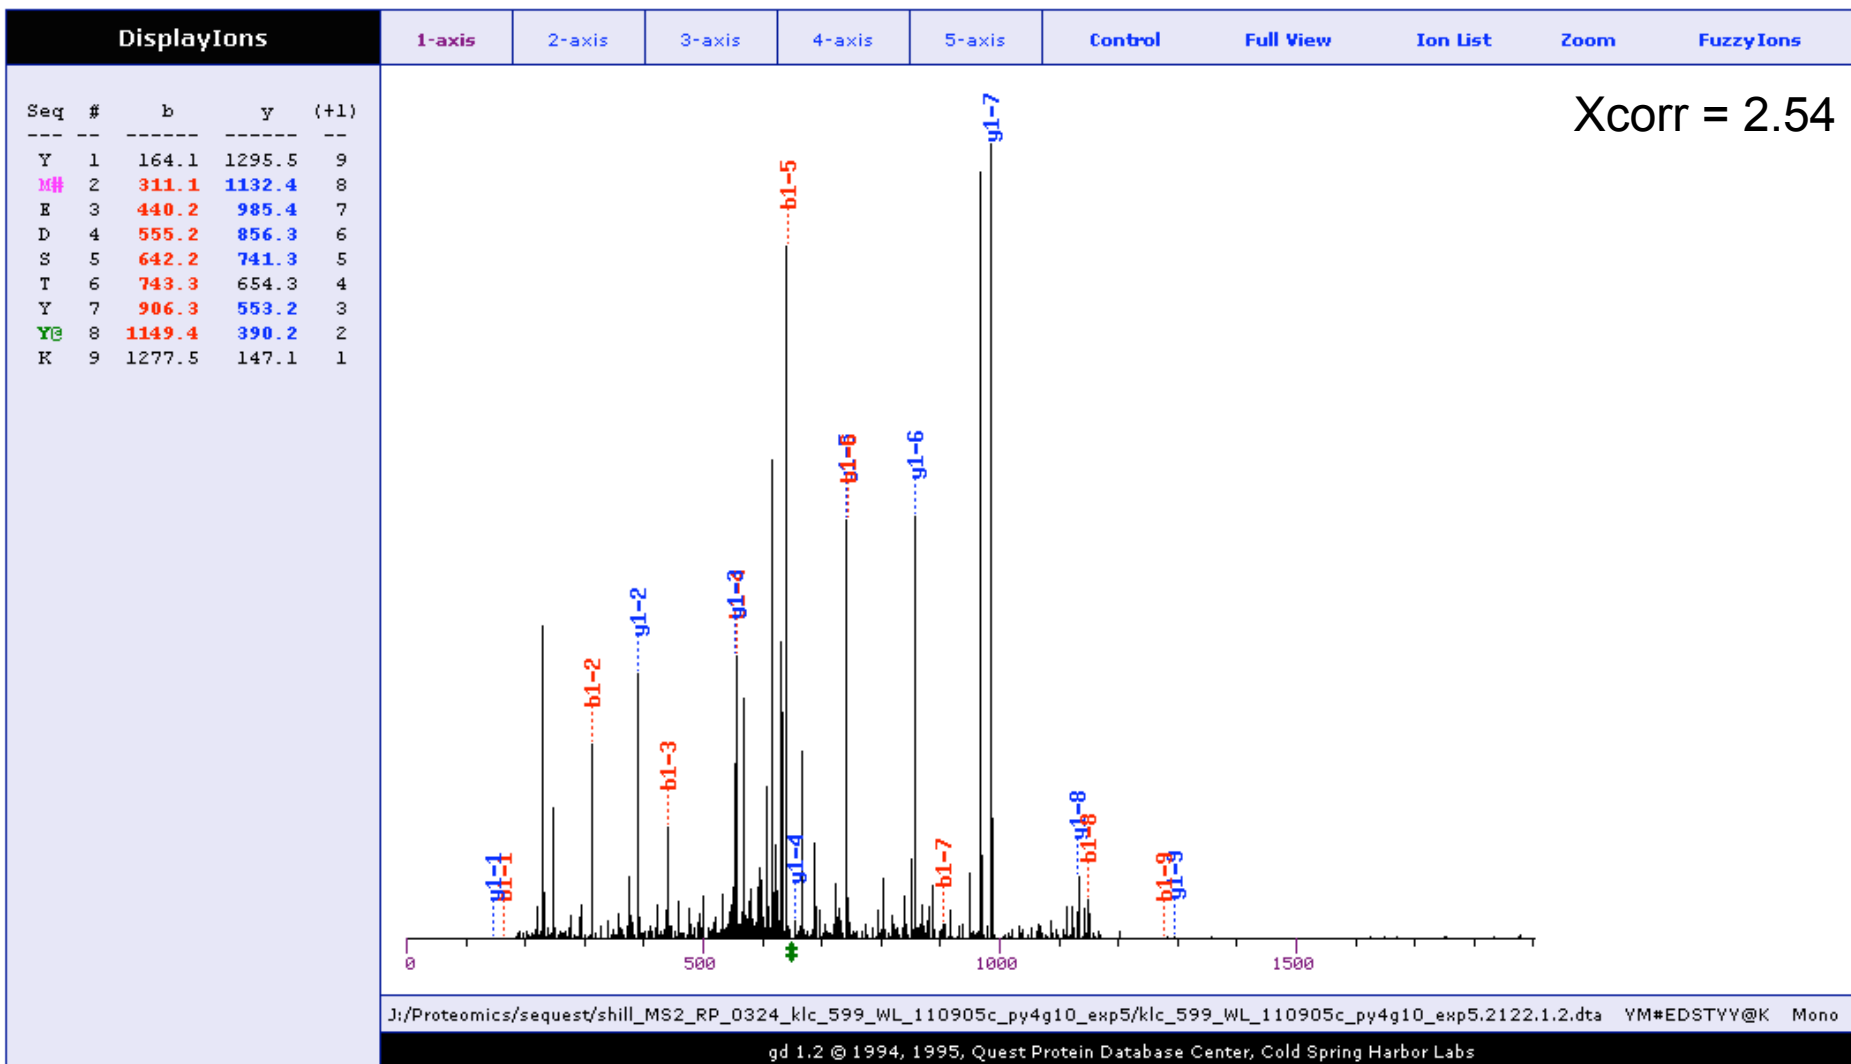

# SgK269 pY632/pY638

N.AI KVPIVINPNAY@DNLAIY@KSF.L

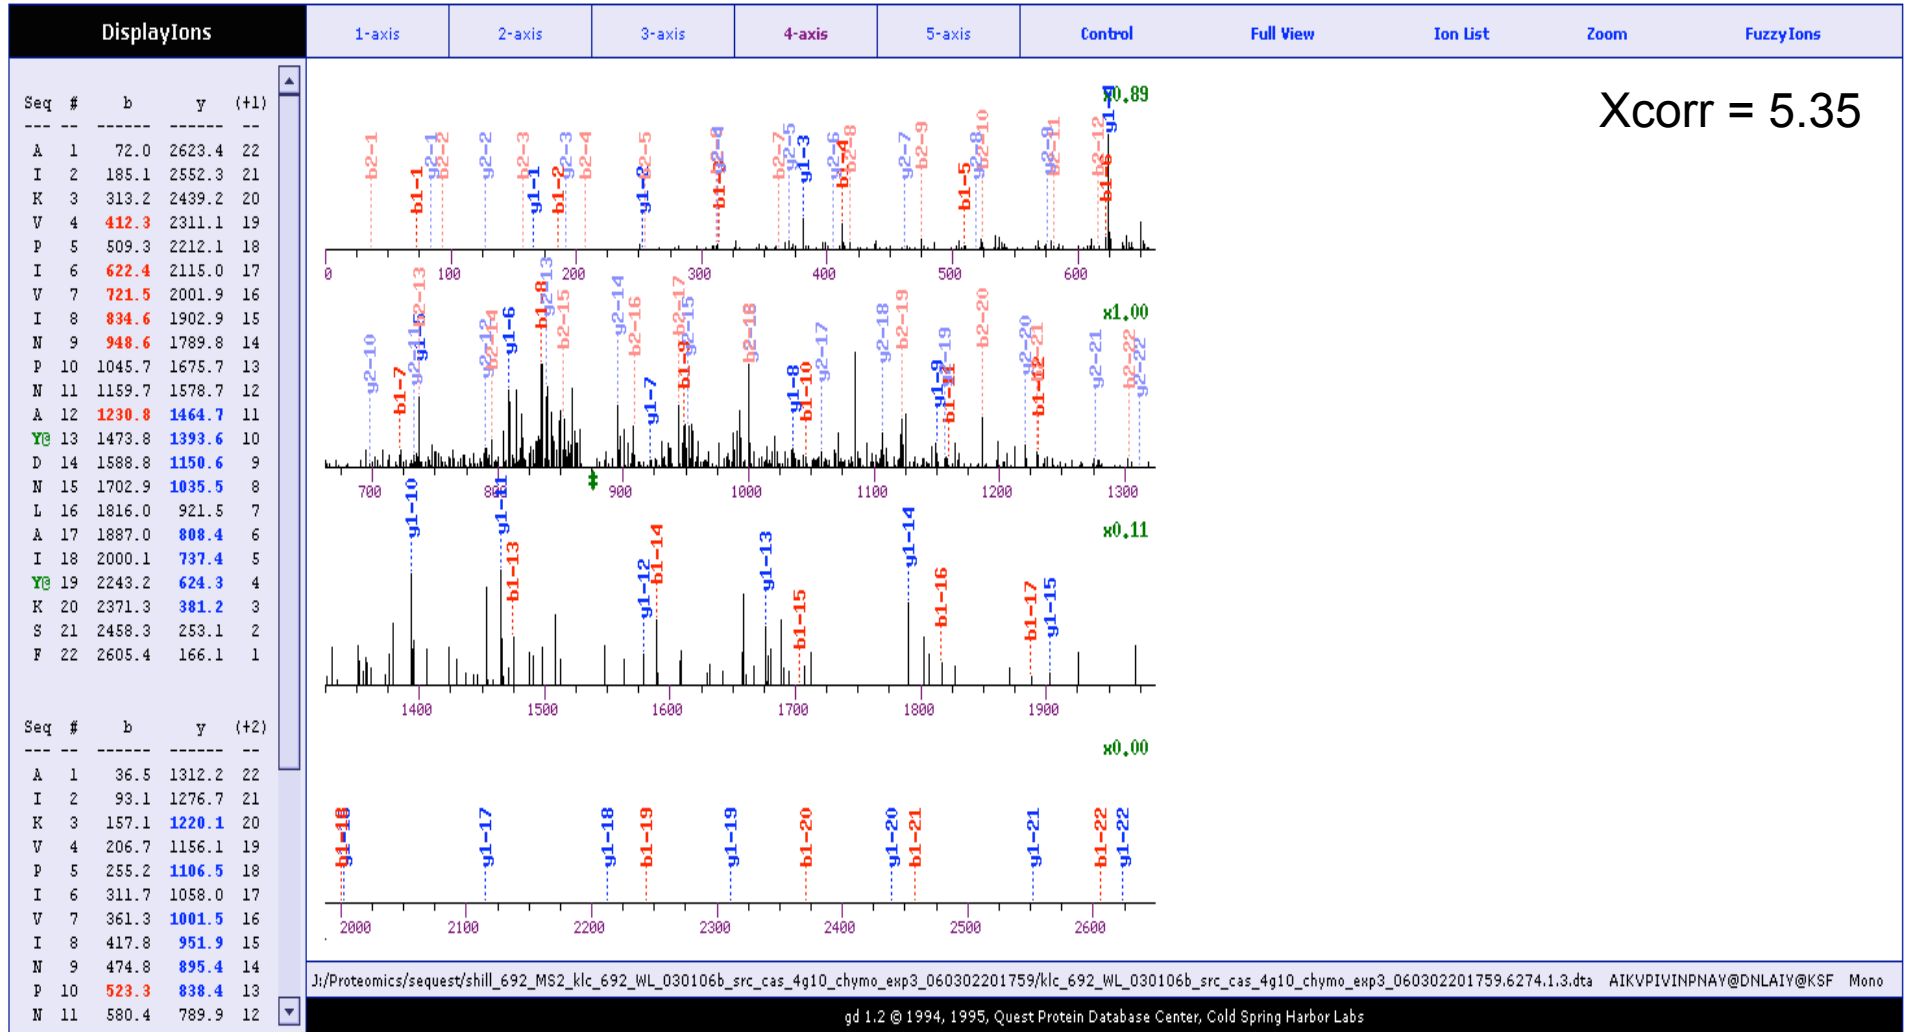

SgK269 pY632/pY638

K.VPIVINPNAY@DNLAIIY@K.S

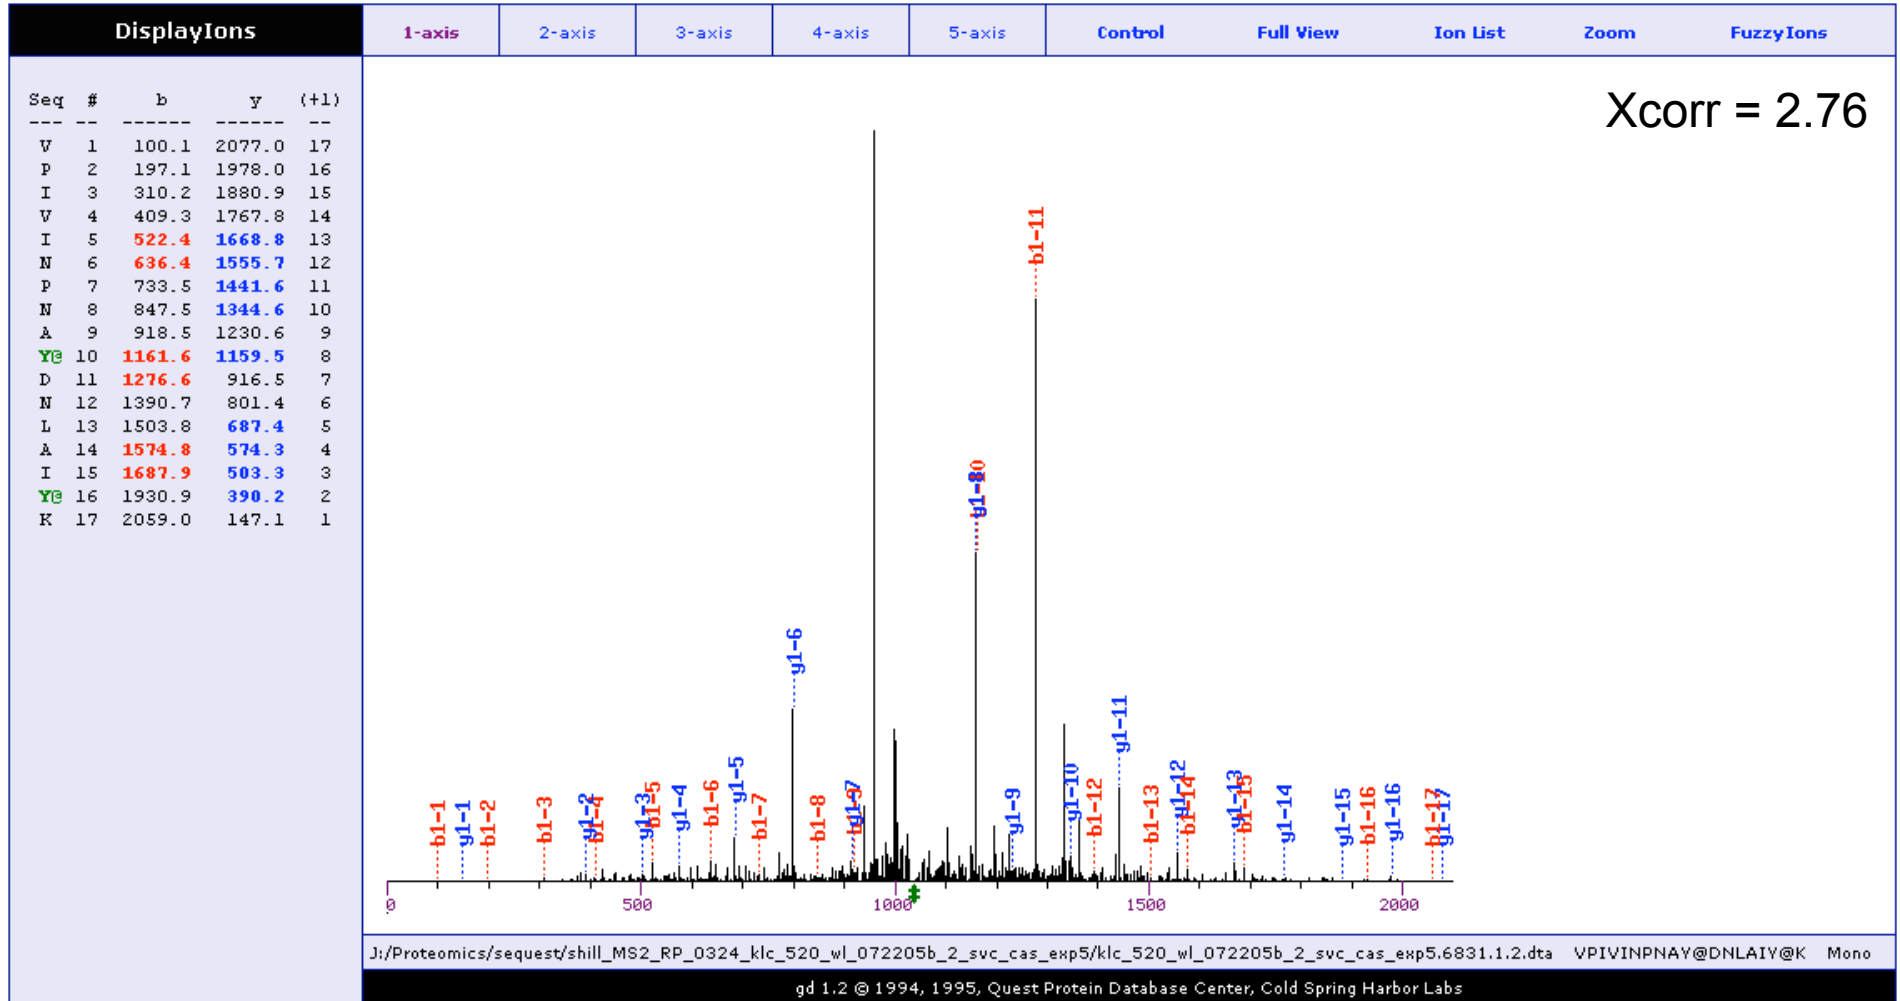

SgK269 pY638

K.NAIKVPIVINPNAYDNLAIV@K.S

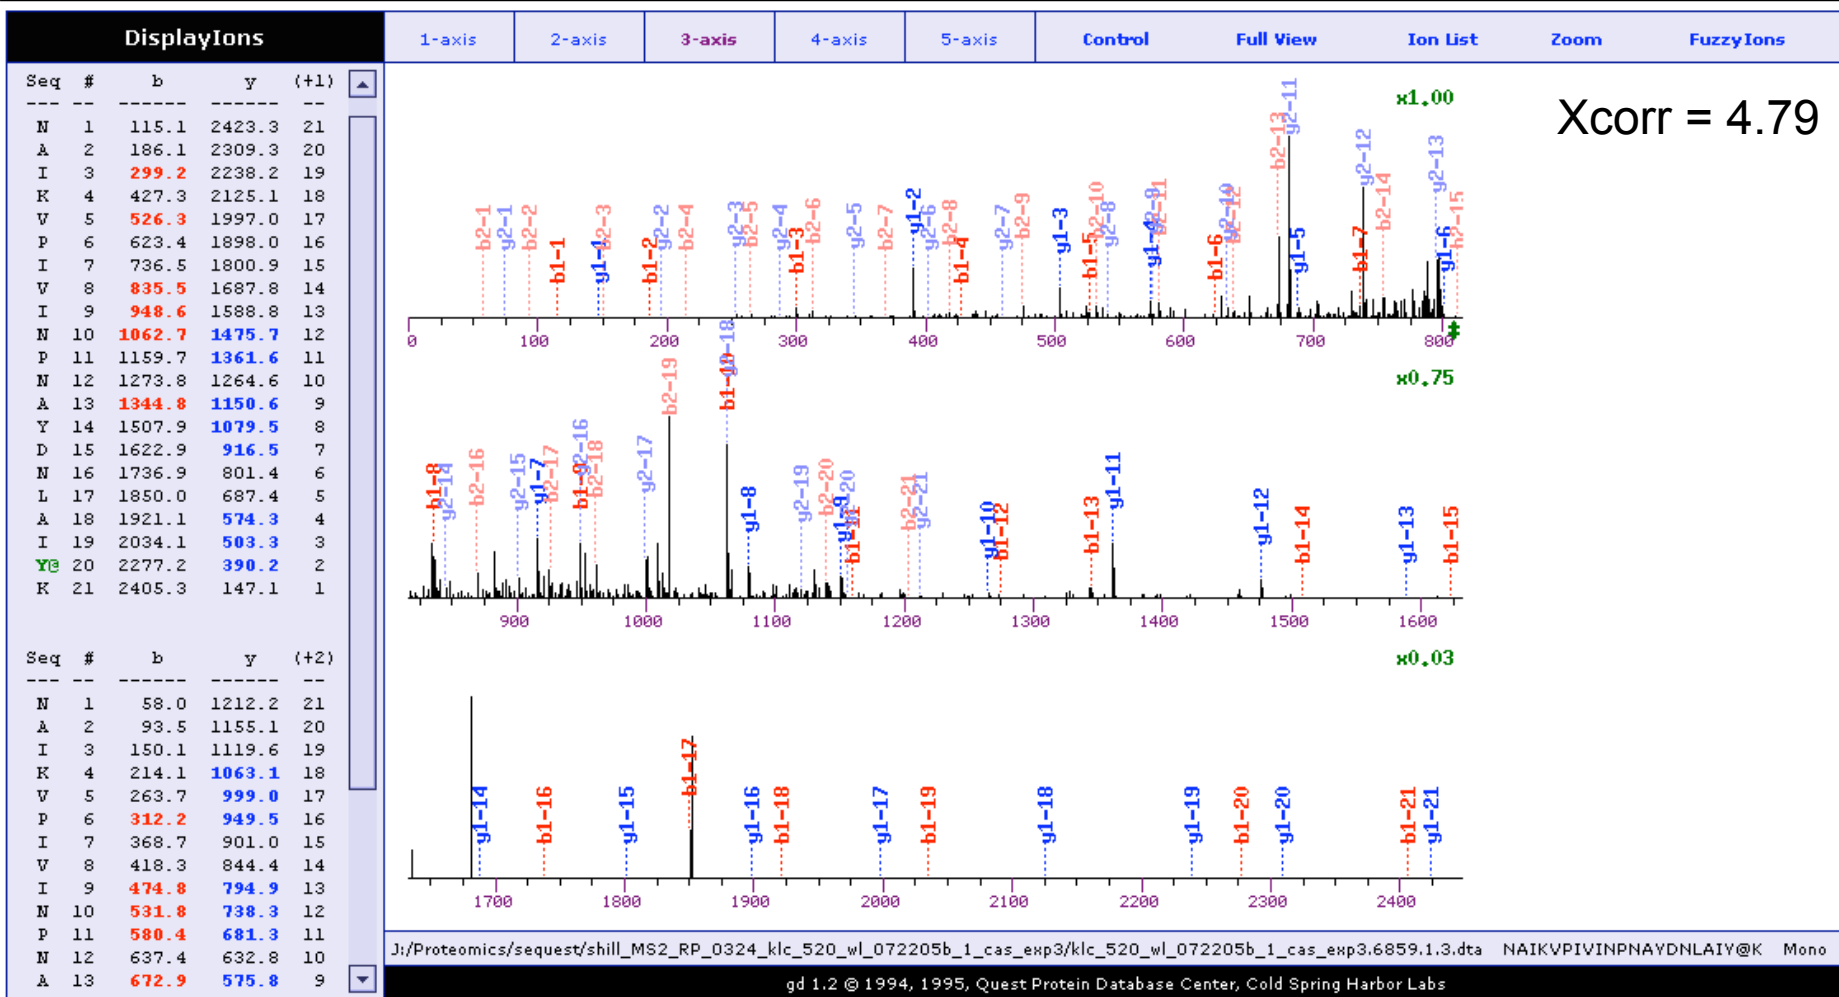

SgK269 pY632

K.NAIKVPIVINPNAY@DNLAITYK.S

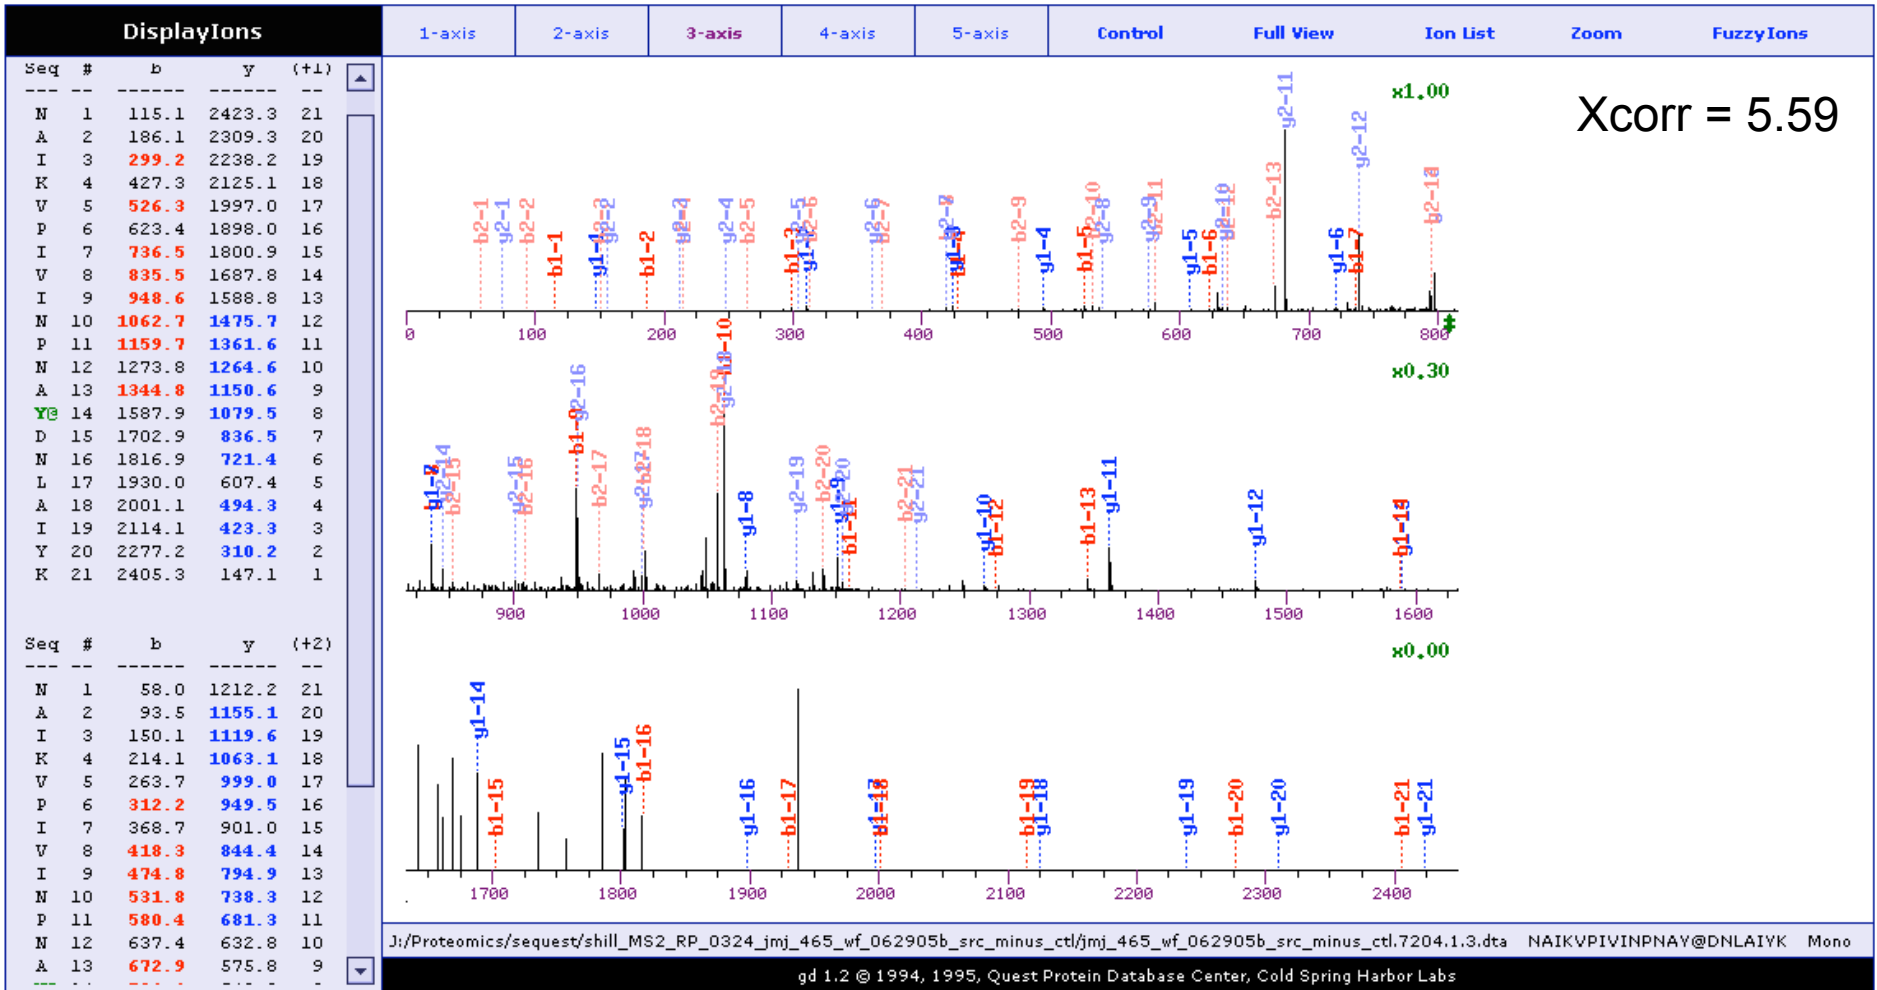

SgK269 pY632/pY638

K.NAIKVPIVINPNAY@DNLAIY@K.S

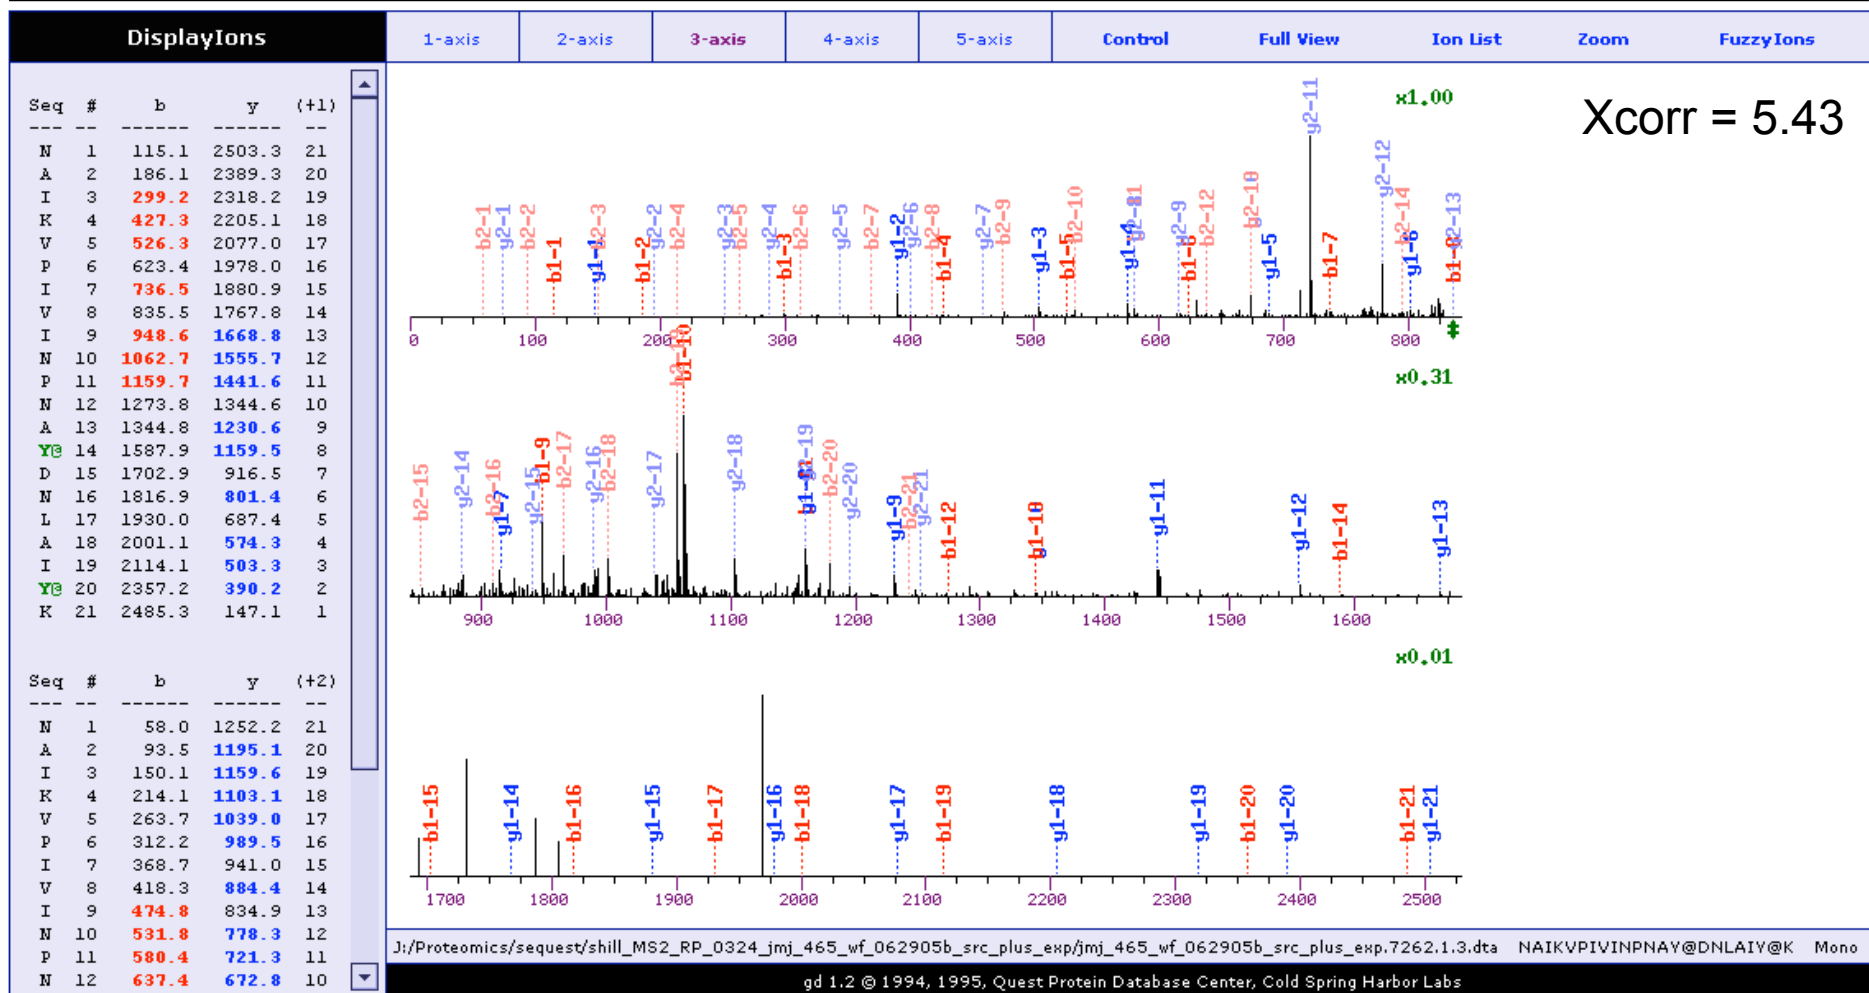

SgK269 pY632/pY638

K.NAIKVPIVINPNAY@DNLAIY@K.S

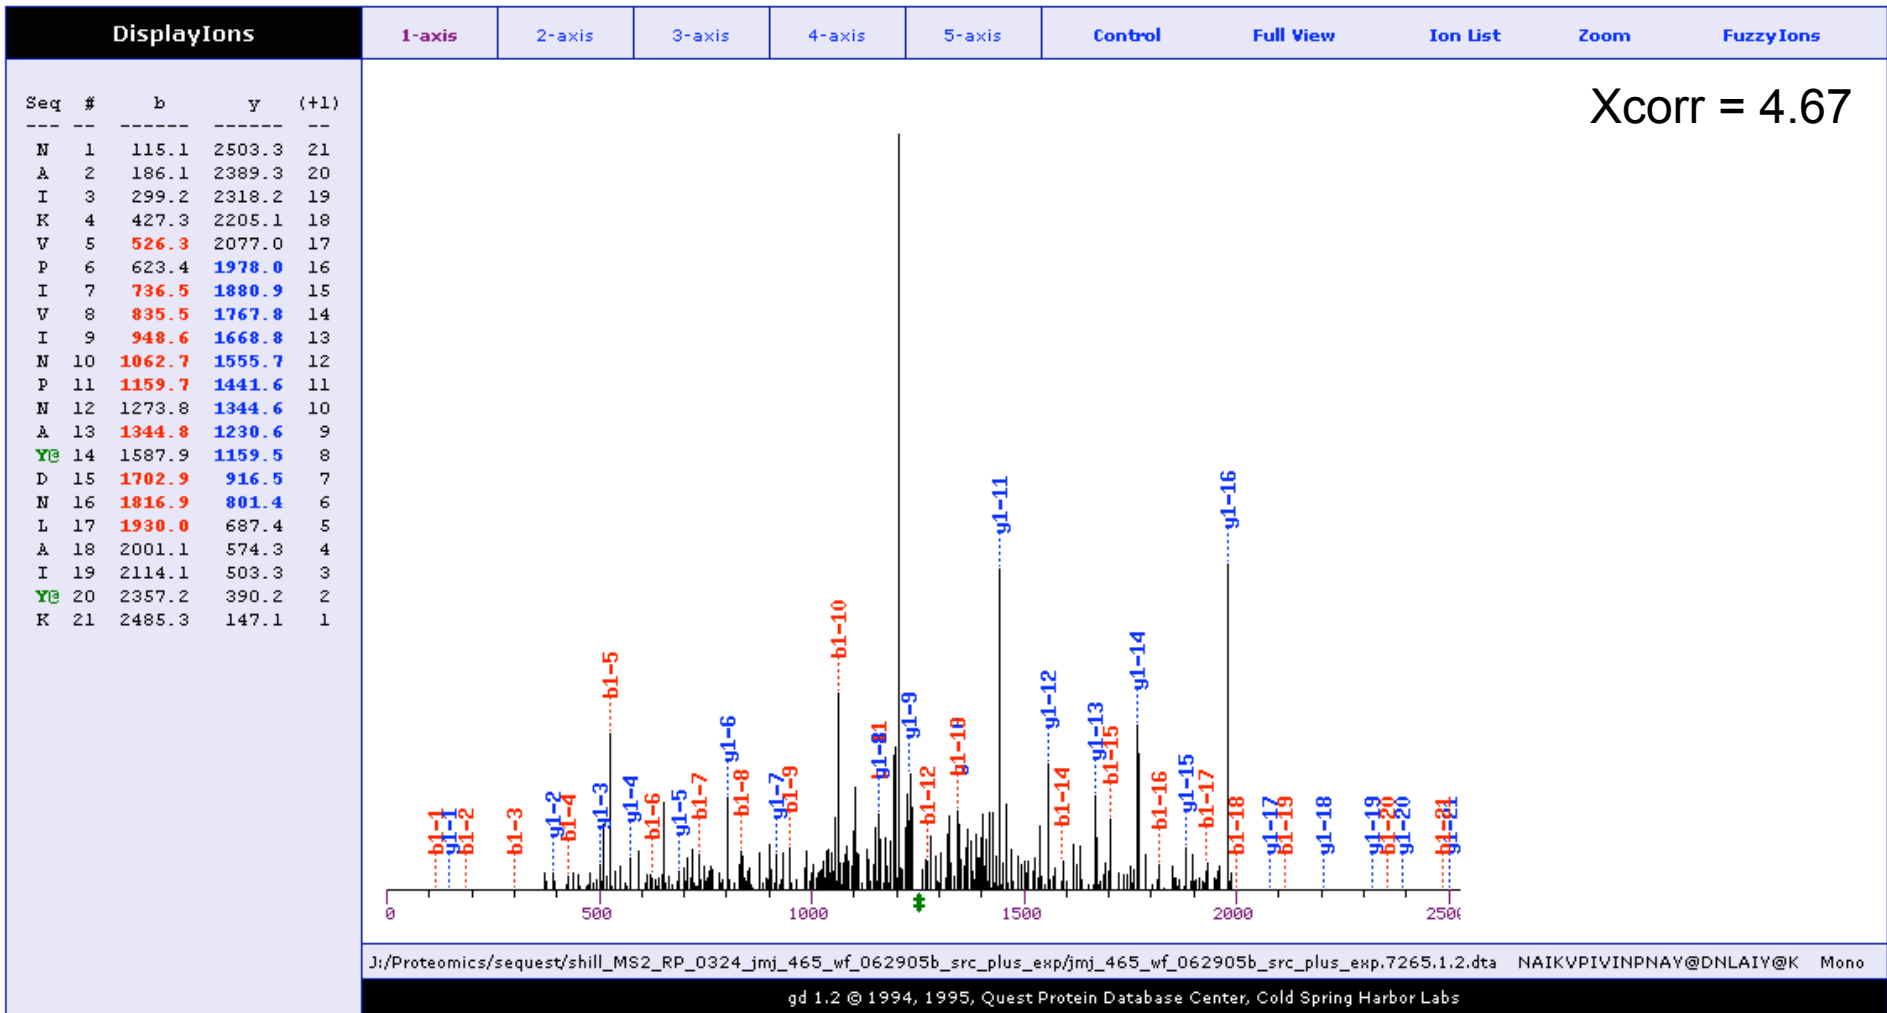

SHP-2 pY62

K.IQNTGDY@YDLYGGEK.F

DisplayIons

1-axis

2-axis

3-axis

4-axis

5-axis

Control

Full View

Ion List

Zoom

FuzzyIons

| Seq # | b      | y      | (+1) |
|-------|--------|--------|------|
| I 1   | 114.1  | 1815.8 | 15   |
| Q 2   | 242.2  | 1702.7 | 14   |
| N 3   | 356.2  | 1574.6 | 13   |
| T 4   | 457.2  | 1460.6 | 12   |
| G 5   | 514.3  | 1359.5 | 11   |
| D 6   | 629.3  | 1302.5 | 10   |
| Y 7   | 872.4  | 1187.5 | 9    |
| Y 8   | 1035.4 | 944.4  | 8    |
| D 9   | 1150.4 | 781.4  | 7    |
| L 10  | 1263.5 | 666.3  | 6    |
| Y 11  | 1426.6 | 553.3  | 5    |
| G 12  | 1483.6 | 390.2  | 4    |
| G 13  | 1540.6 | 333.2  | 3    |
| E 14  | 1669.7 | 276.2  | 2    |
| K 15  | 1797.8 | 147.1  | 1    |

Xcorr = 4.69

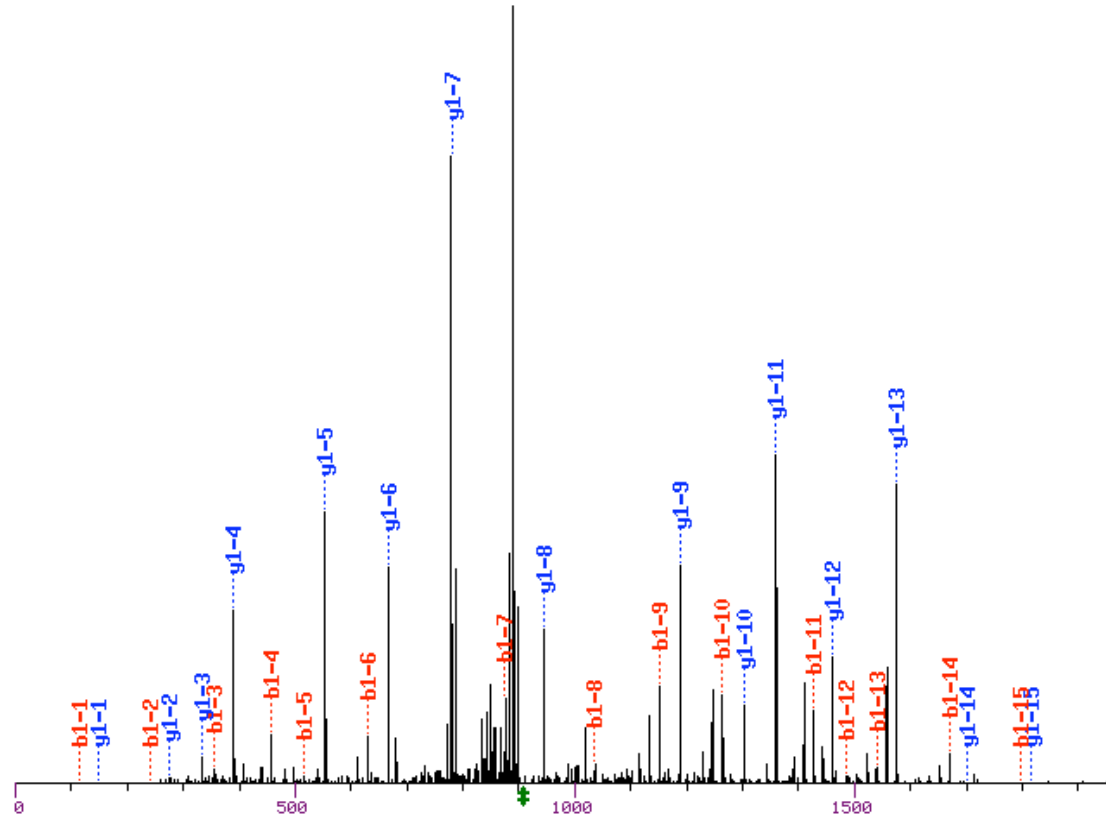

J:/Proteomics/sequest/shill\_MS2\_RP\_0324\_jmj\_465\_wf\_062905b\_src\_plus\_exp/jmj\_465\_wf\_062905b\_src\_plus\_exp.5400.1.2.dta IQNTGDY@YDLYGGEK Mono



SHP-2 pY62

H.IKIQNTGDY@YDLY.G

DisplayIons

| Seq # | b      | y (+1)    |
|-------|--------|-----------|
| I 1   | 114.1  | 1685.8 13 |
| K 2   | 242.2  | 1572.7 12 |
| I 3   | 355.3  | 1444.6 11 |
| Q 4   | 483.3  | 1331.5 10 |
| N 5   | 597.4  | 1203.5 9  |
| T 6   | 698.4  | 1089.4 8  |
| C 7   | 755.4  | 988.4 7   |
| D 8   | 870.5  | 931.3 6   |
| Y 9   | 1113.5 | 816.3 5   |
| Y 10  | 1276.6 | 573.3 4   |
| D 11  | 1391.6 | 410.2 3   |
| L 12  | 1504.7 | 295.2 2   |
| Y 13  | 1667.8 | 182.1 1   |

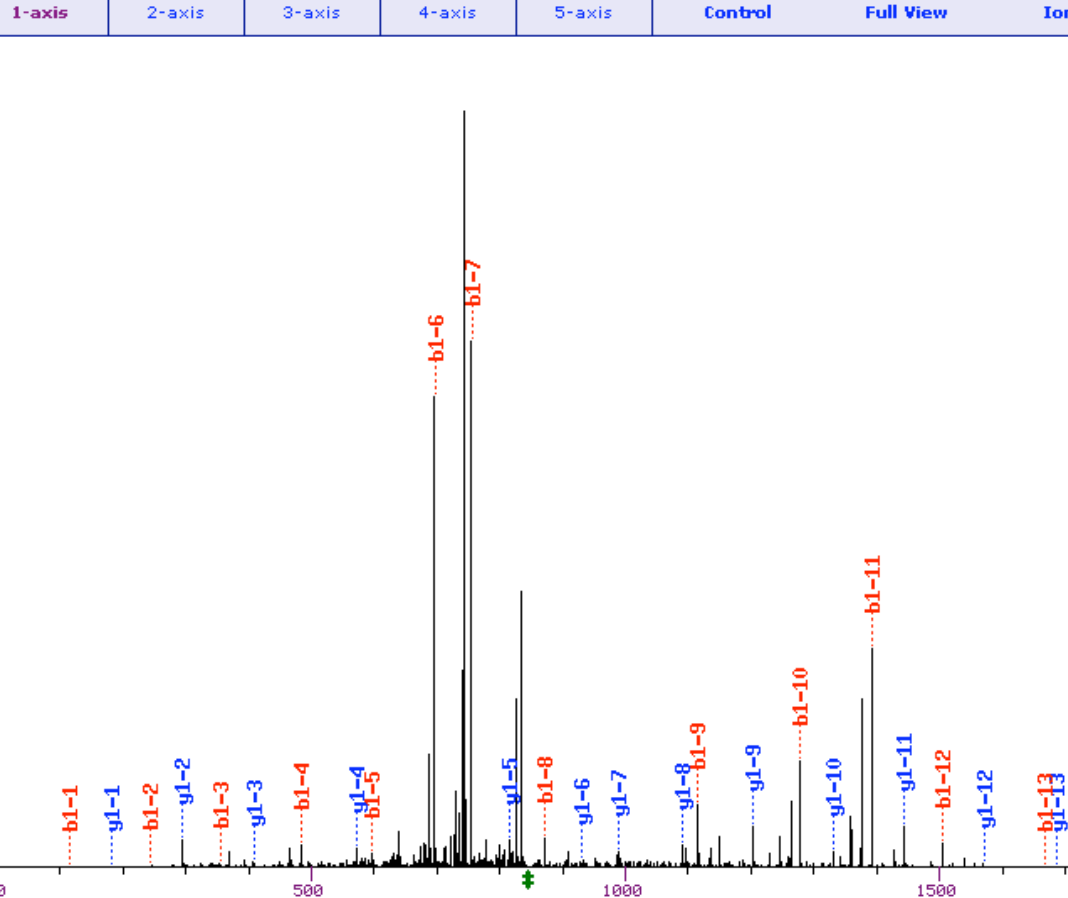

Xcorr = 3.55

J:/Proteomics/sequest/shill\_599\_MS2\_klc\_599\_WL\_110905c\_src\_cas\_chymo\_exp2/klc\_599\_WL\_110905c\_src\_cas\_chymo\_exp2.4984.1.2.dta IKIQNTGDY@YDLY Mono

PI3K p85alpha pY467

K.SREYDRLY@EEYTR.T

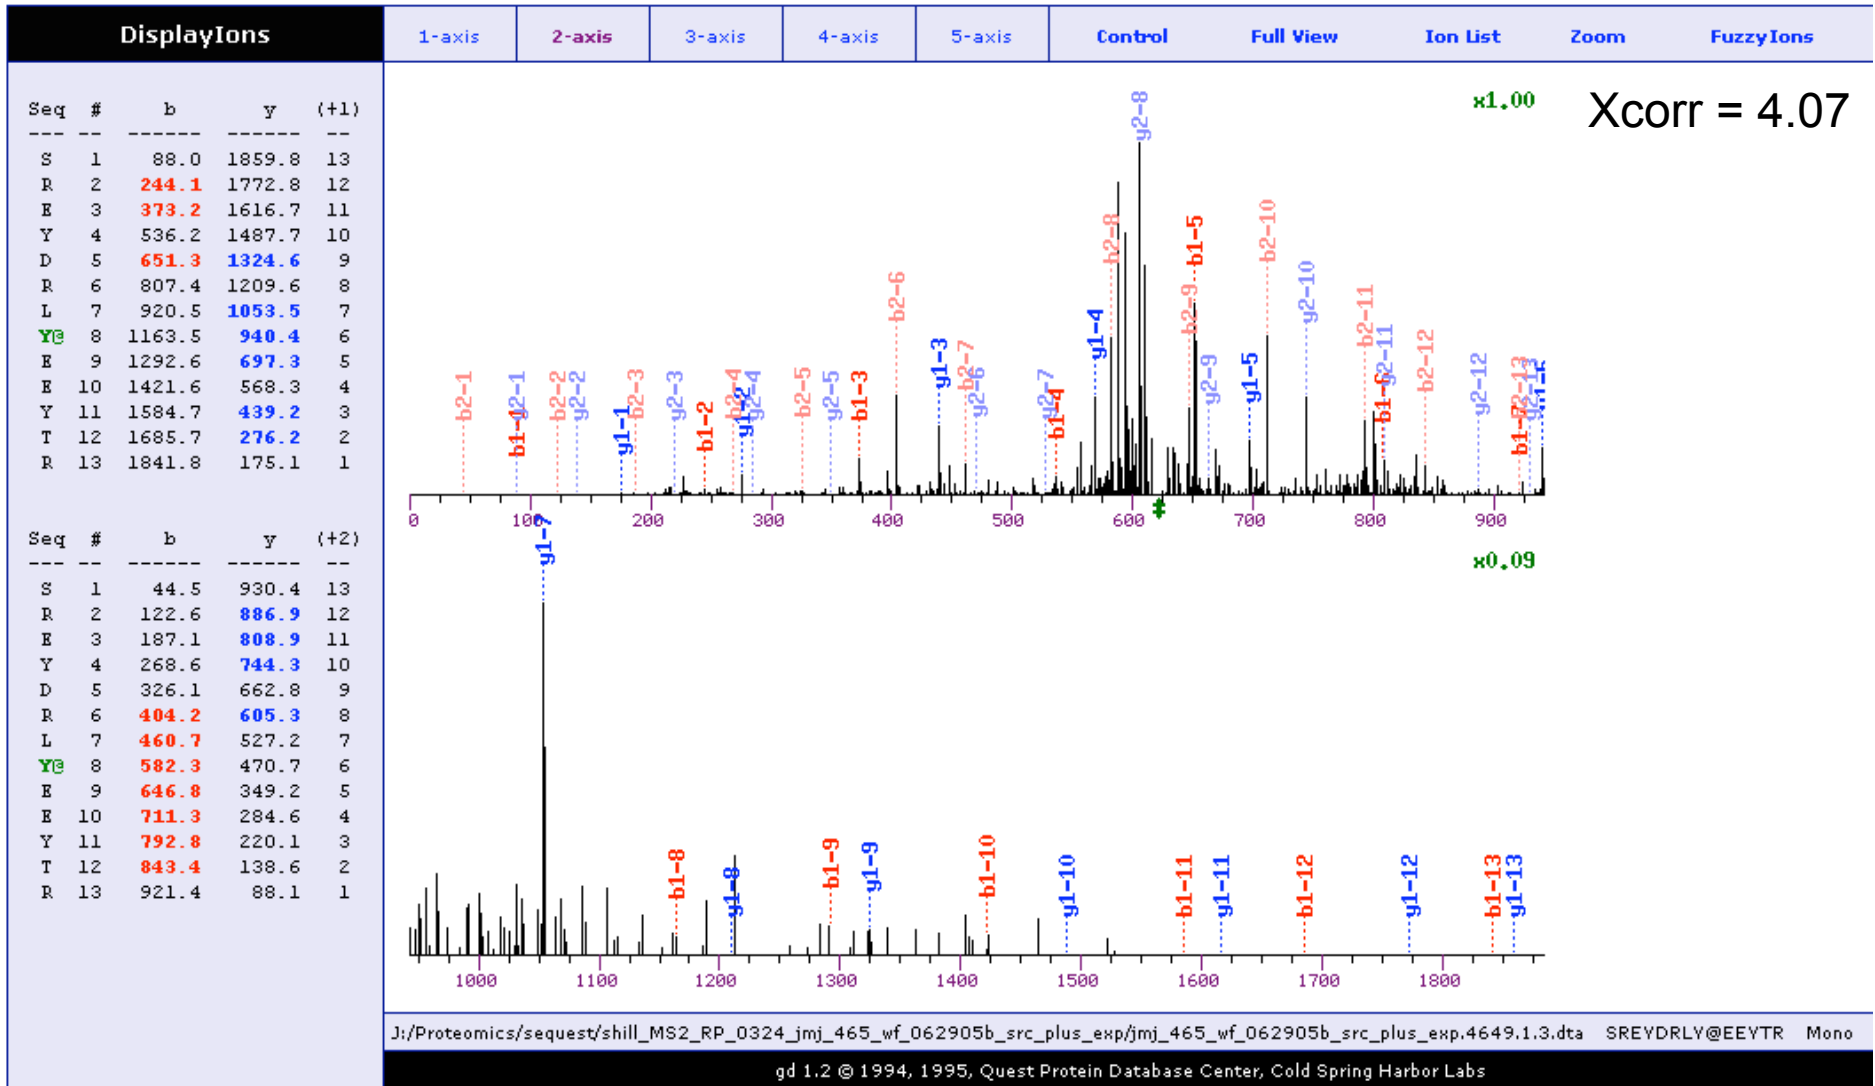

SHIP2 pY987

K.NSFNNPAY@YVLEGVPHQLLPLEPPSLAR.A

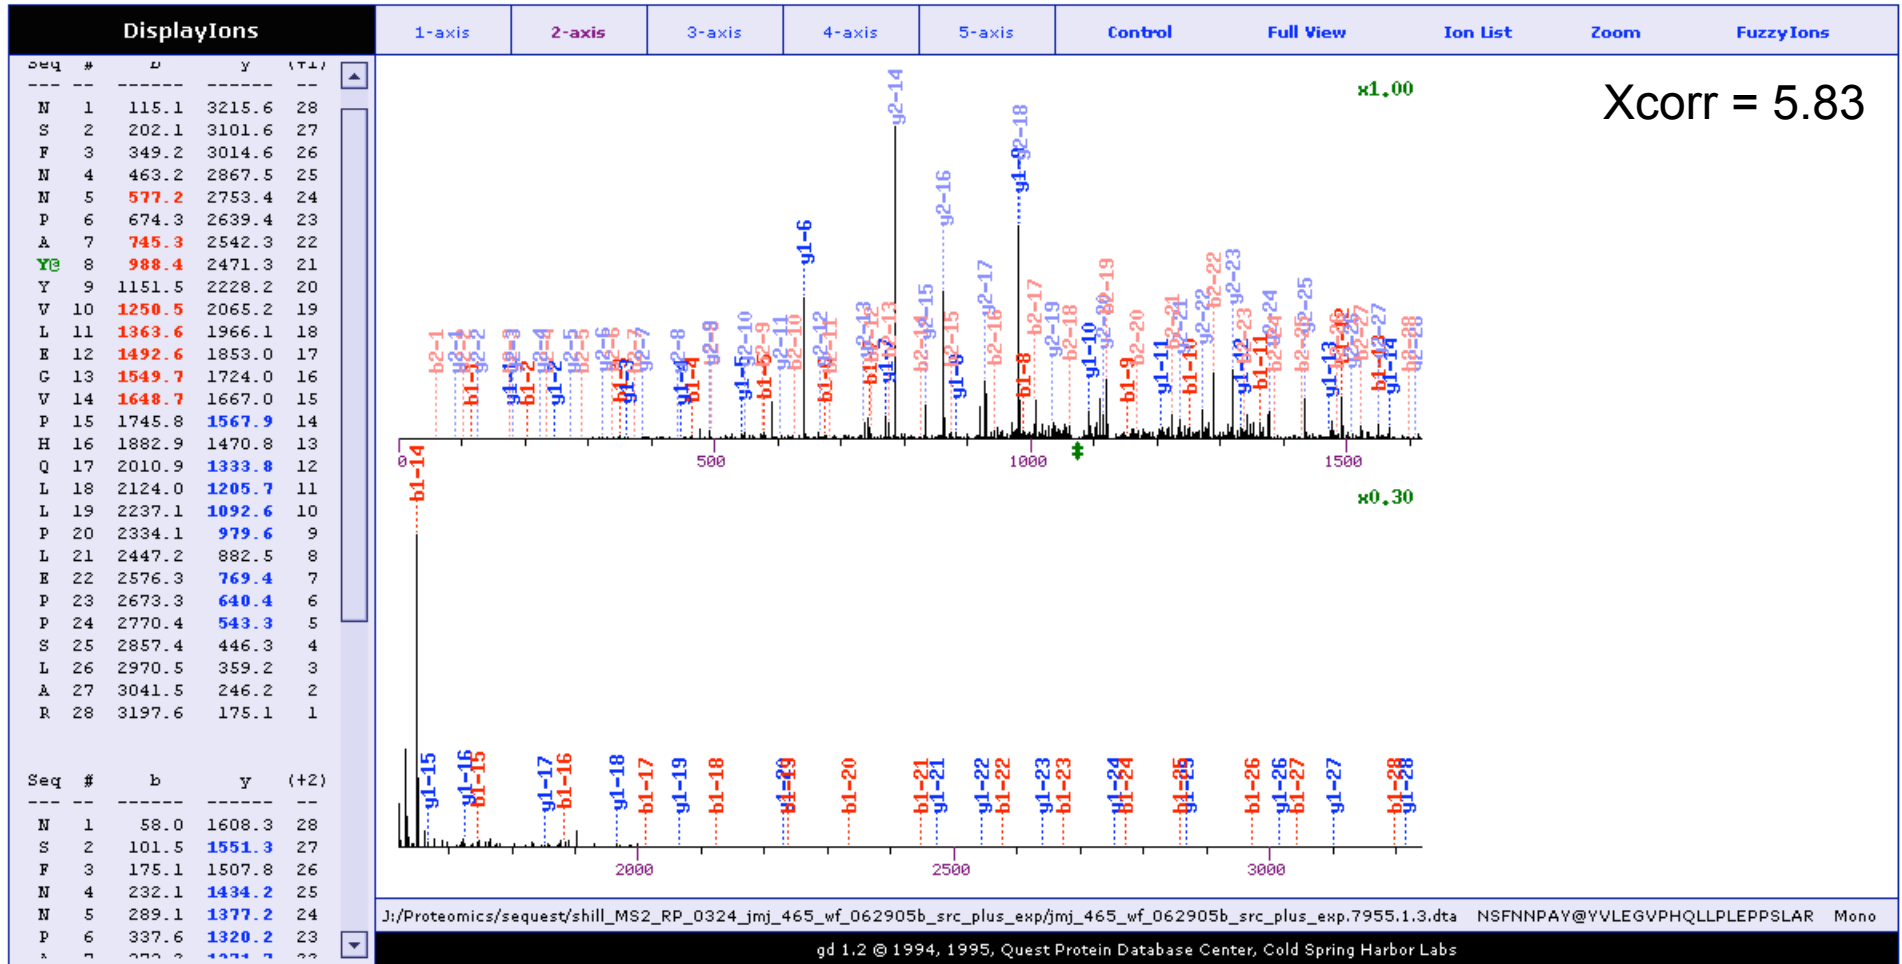

GIT1 pY554

R.LQPFHSTELEDDAIY@SVHVPAGLYR.I

DisplayIons

| Seq # | b      | y      | (+1) |
|-------|--------|--------|------|
| L 1   | 114.1  | 2937.4 | 25   |
| Q 2   | 242.2  | 2824.3 | 24   |
| P 3   | 339.2  | 2696.3 | 23   |
| F 4   | 486.3  | 2599.2 | 22   |
| H 5   | 623.3  | 2452.2 | 21   |
| S 6   | 710.4  | 2315.1 | 20   |
| T 7   | 811.4  | 2228.1 | 19   |
| E 8   | 940.5  | 2127.0 | 18   |
| L 9   | 1053.5 | 1998.0 | 17   |
| E 10  | 1182.6 | 1884.9 | 16   |
| D 11  | 1297.6 | 1755.8 | 15   |
| D 12  | 1412.6 | 1640.8 | 14   |
| A 13  | 1483.7 | 1525.8 | 13   |
| I 14  | 1596.8 | 1454.8 | 12   |
| Y 15  | 1839.8 | 1341.7 | 11   |
| S 16  | 1926.8 | 1098.6 | 10   |
| V 17  | 2025.9 | 1011.6 | 9    |
| H 18  | 2163.0 | 912.5  | 8    |
| V 19  | 2262.0 | 775.4  | 7    |
| P 20  | 2359.1 | 676.4  | 6    |
| A 21  | 2430.1 | 579.3  | 5    |
| C 22  | 2487.2 | 508.3  | 4    |
| L 23  | 2600.2 | 451.3  | 3    |
| Y 24  | 2763.3 | 338.2  | 2    |
| R 25  | 2919.4 | 175.1  | 1    |

| Seq # | b     | y      | (+2) |
|-------|-------|--------|------|
| L 1   | 57.5  | 1469.2 | 25   |
| Q 2   | 121.6 | 1412.7 | 24   |
| P 3   | 170.1 | 1348.6 | 23   |
| F 4   | 243.6 | 1300.1 | 22   |
| H 5   | 312.2 | 1226.6 | 21   |
| S 6   | 355.7 | 1158.1 | 20   |
| T 7   | 406.2 | 1114.5 | 19   |
| E 8   | 470.7 | 1064.0 | 18   |

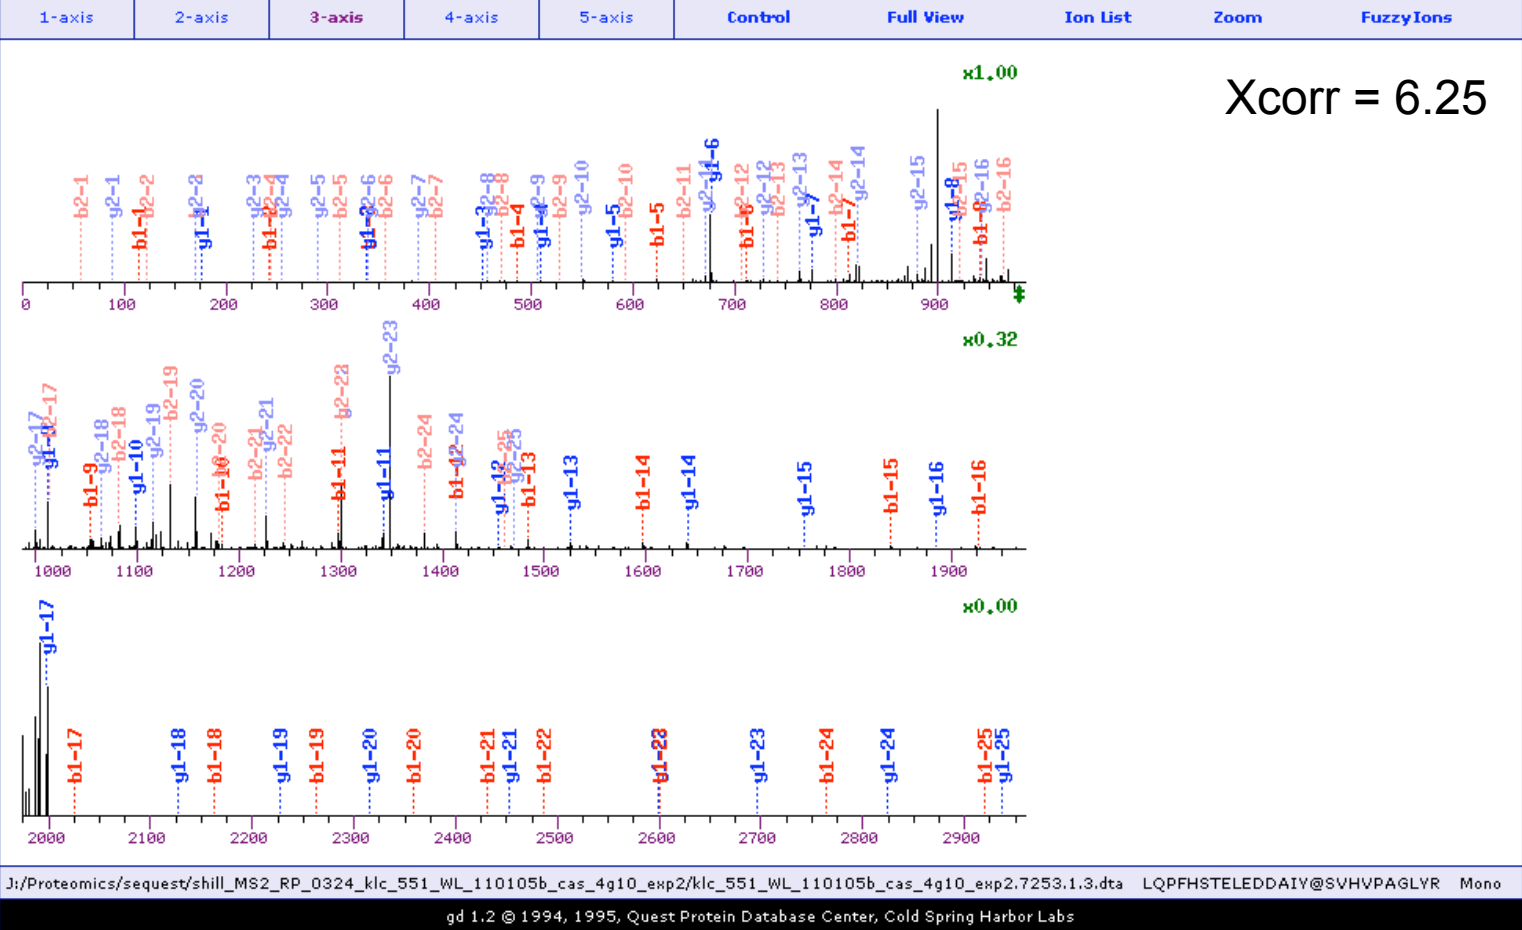

Xcorr = 6.25

GIT1 pY554

R.LQPFHSTELEDDAIY@SVHVPAGLY@R.I

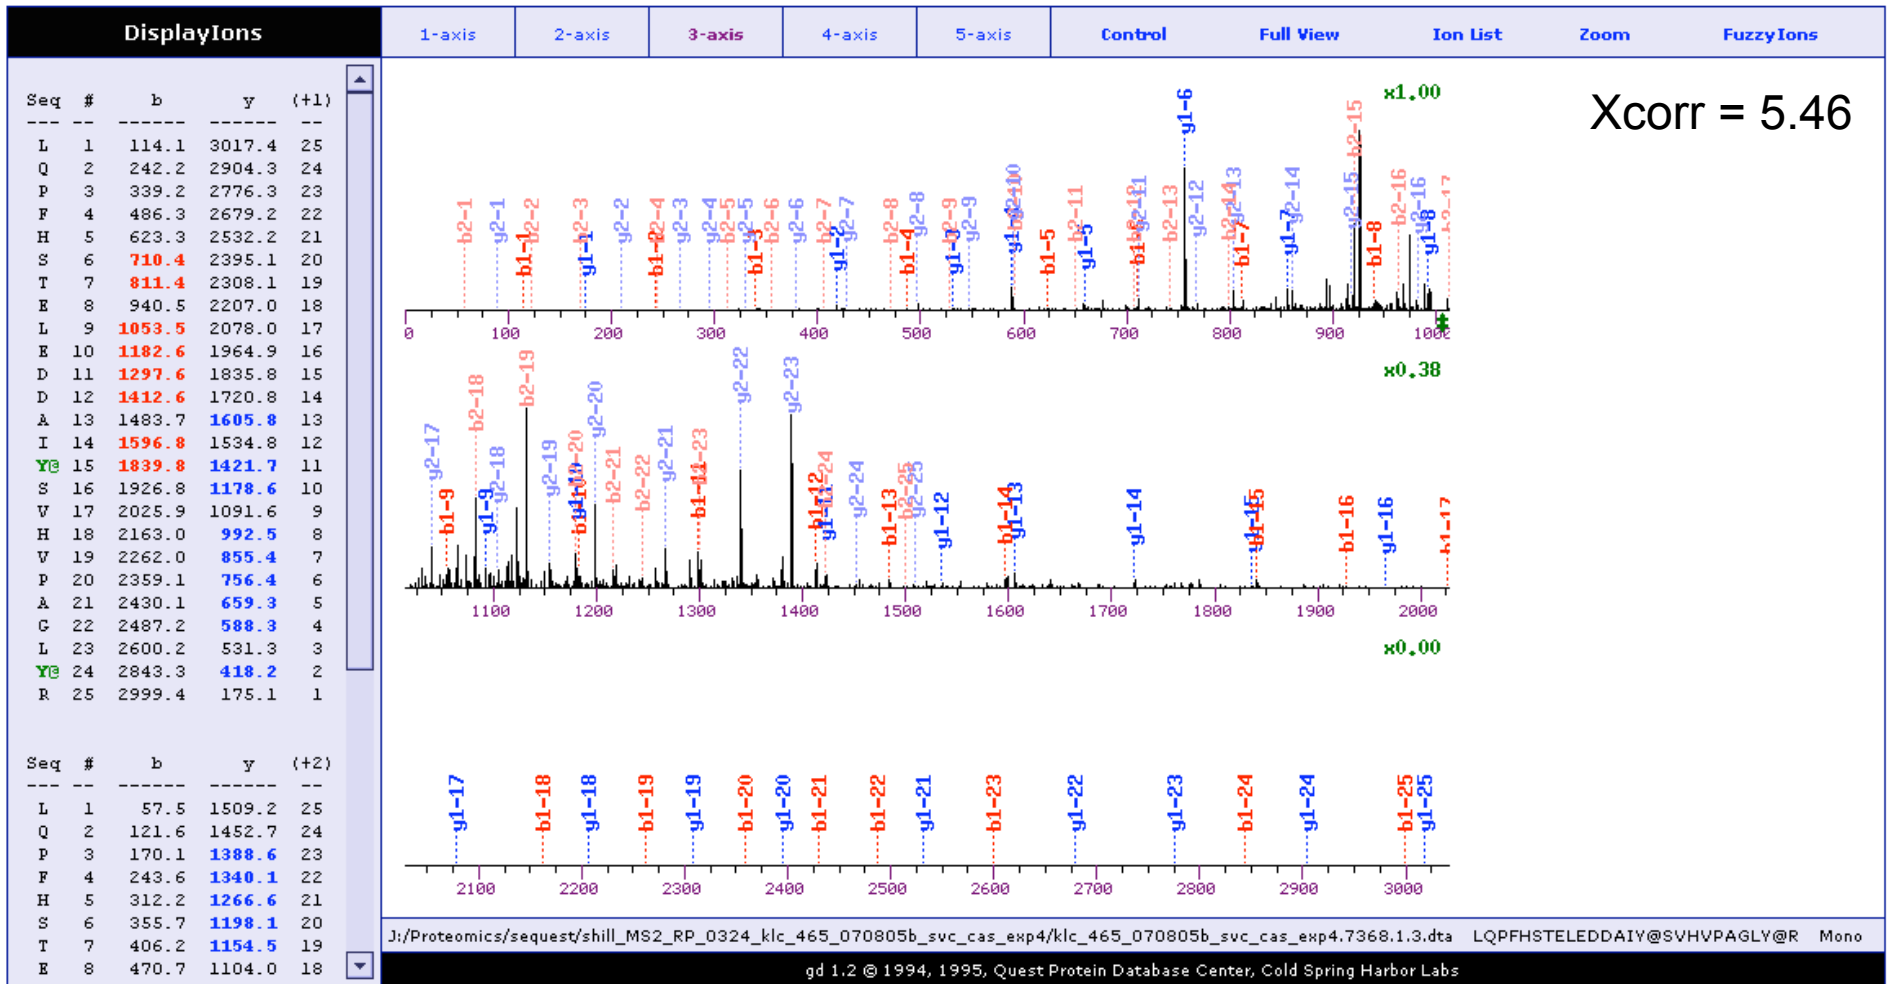

GIT1 pY554

R.LQPFHS^TELEDDAIY@SVHVPAGLYR.I

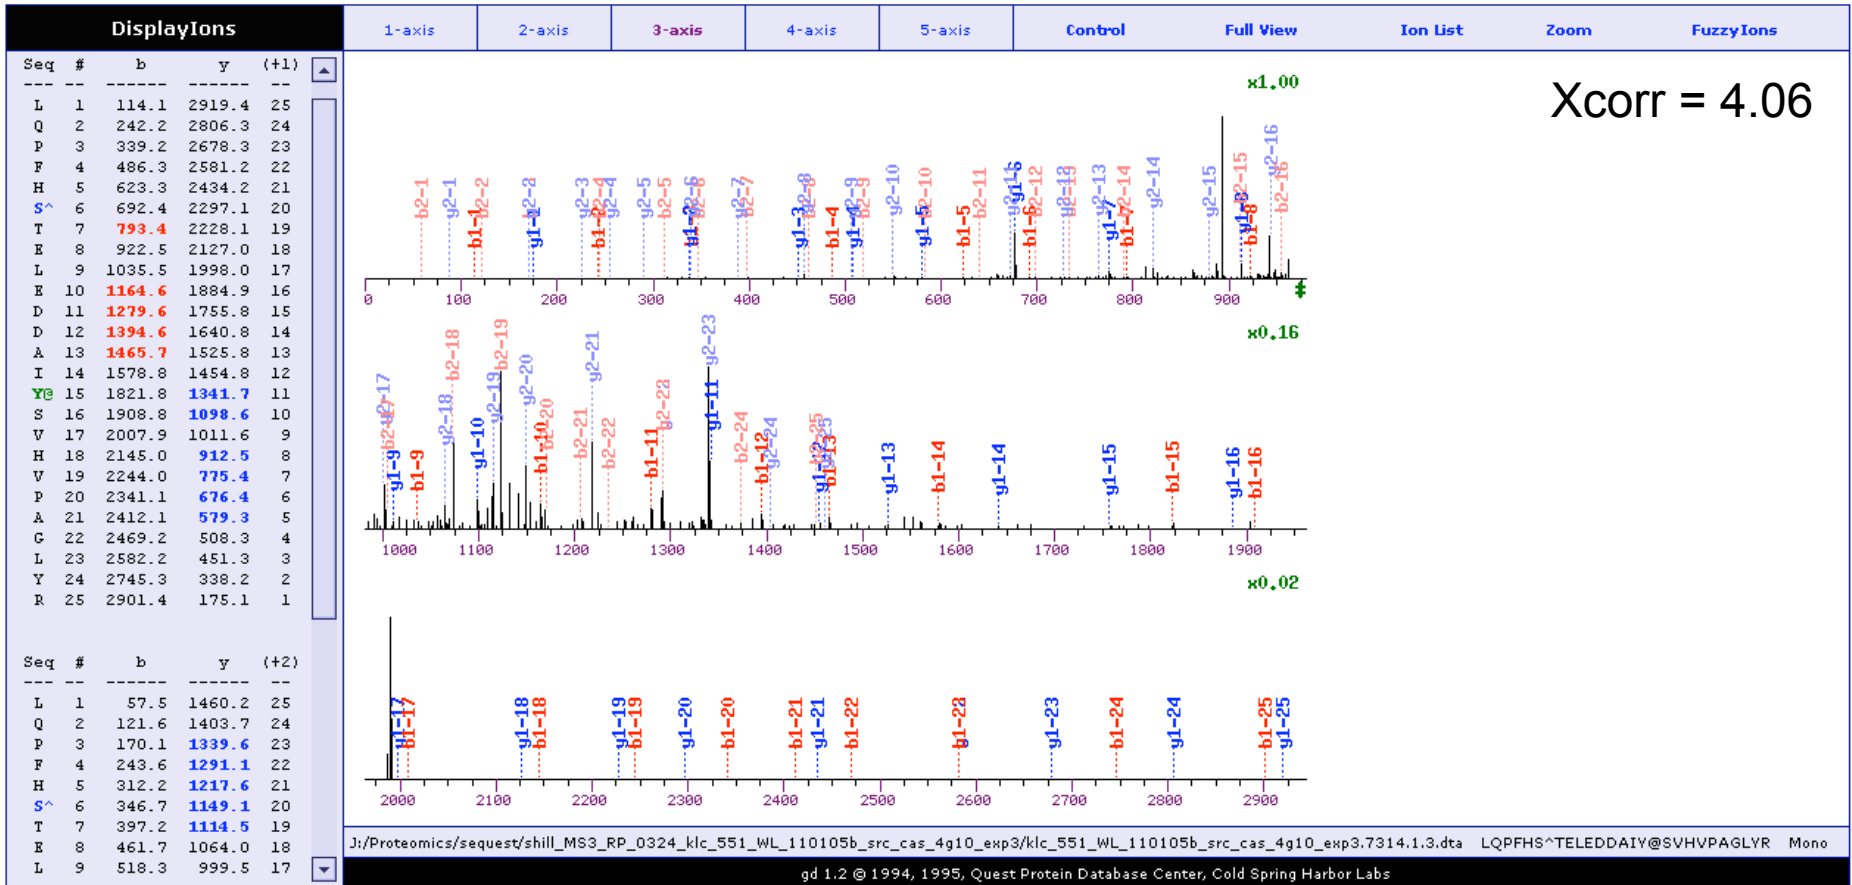

GIT1 pY554

R.LQPFHS@TELEDDAIY@SVHVPAAGLYR.I

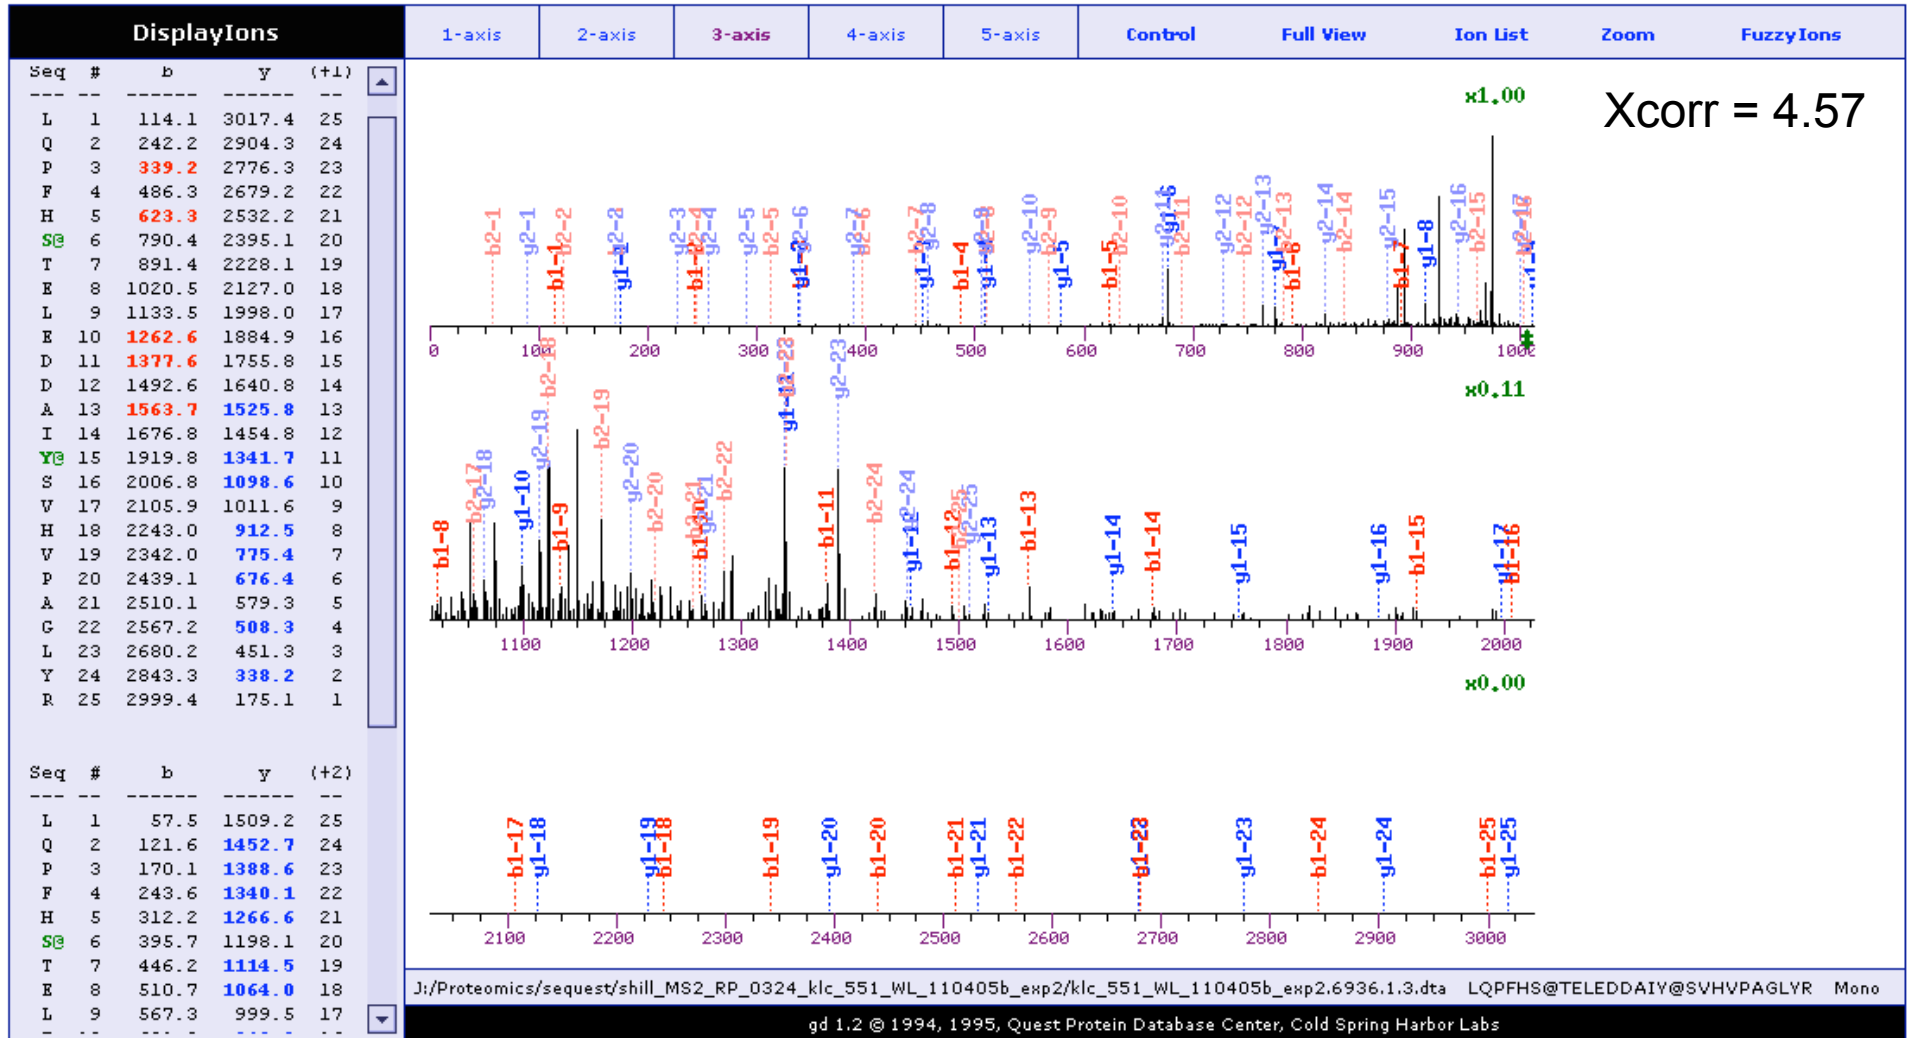

GIT1 pY554

F.HSTELEDDAIY@SVHVPAGLY.R

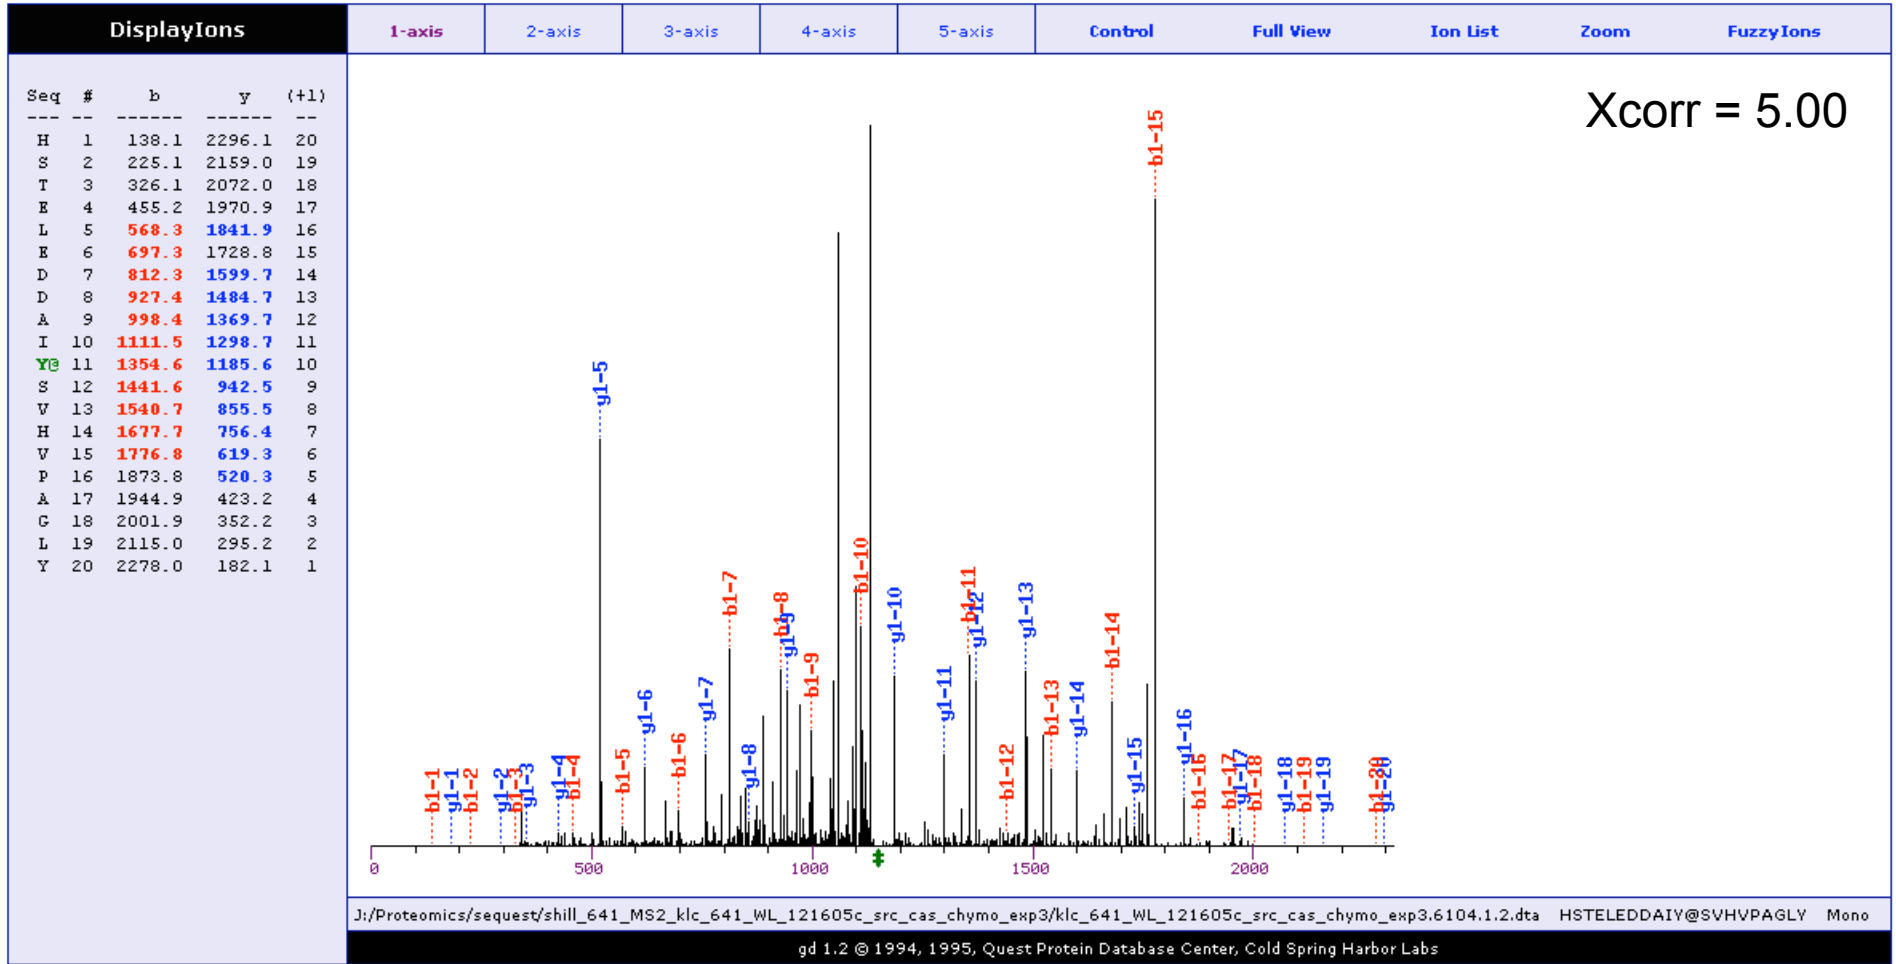



p190RhoGAP pY943 R.NEEENIY@SVPHDSTQGK.I

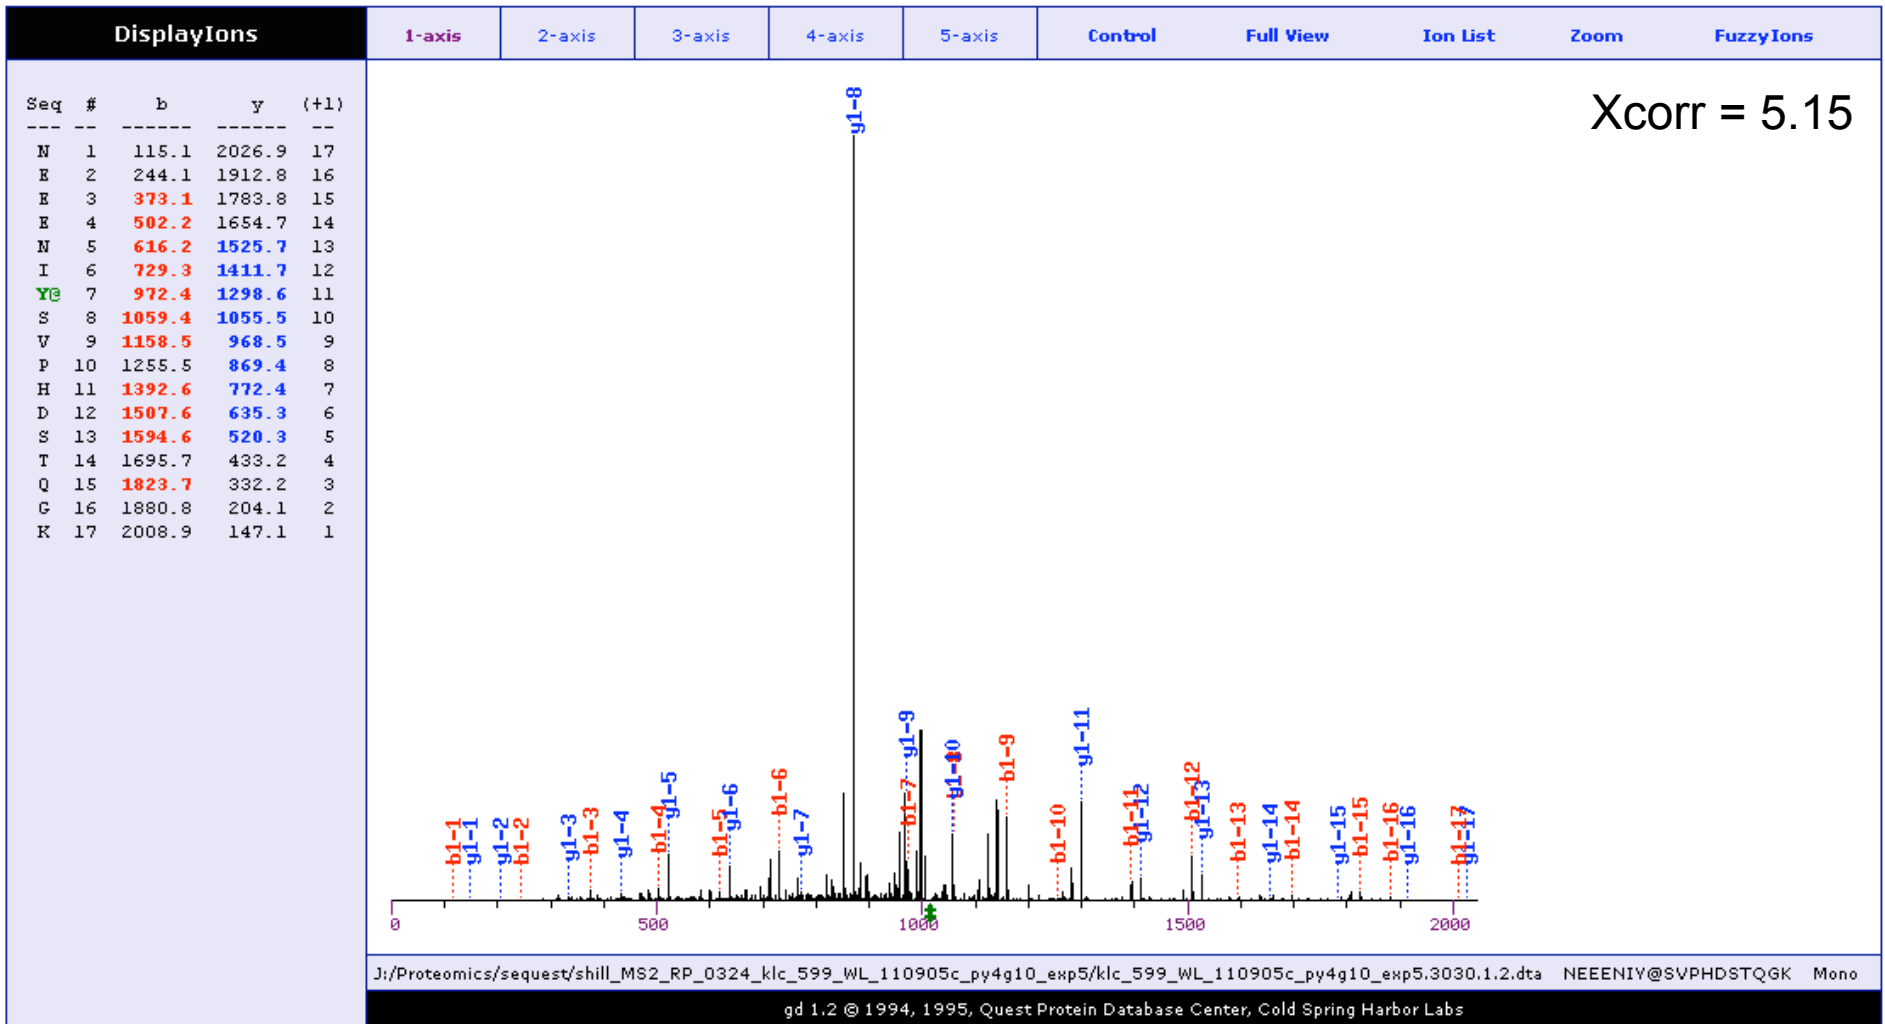

p190RhoGAP pY943 R.NEEENIY@SVPHDSTQGK.I

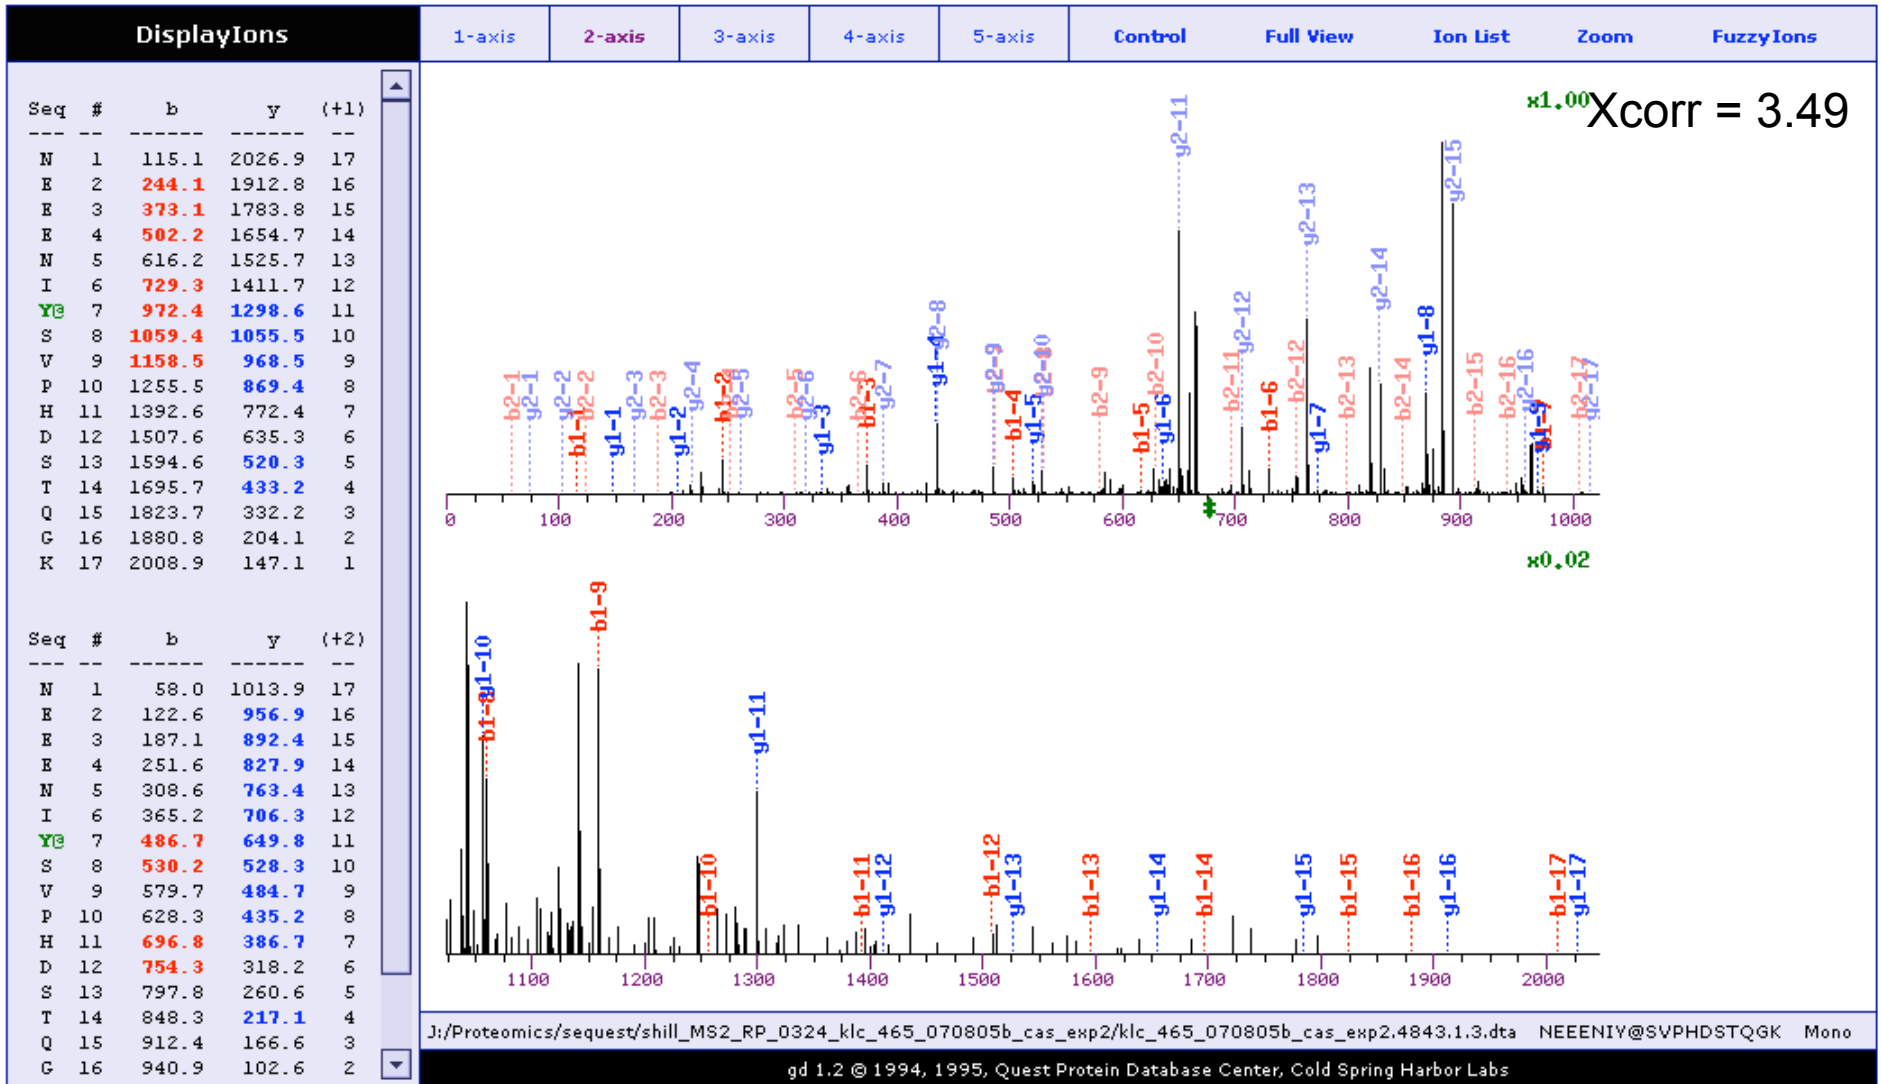

RIN1 pY35

K.EKPSTDPLY@DTPDTR.G

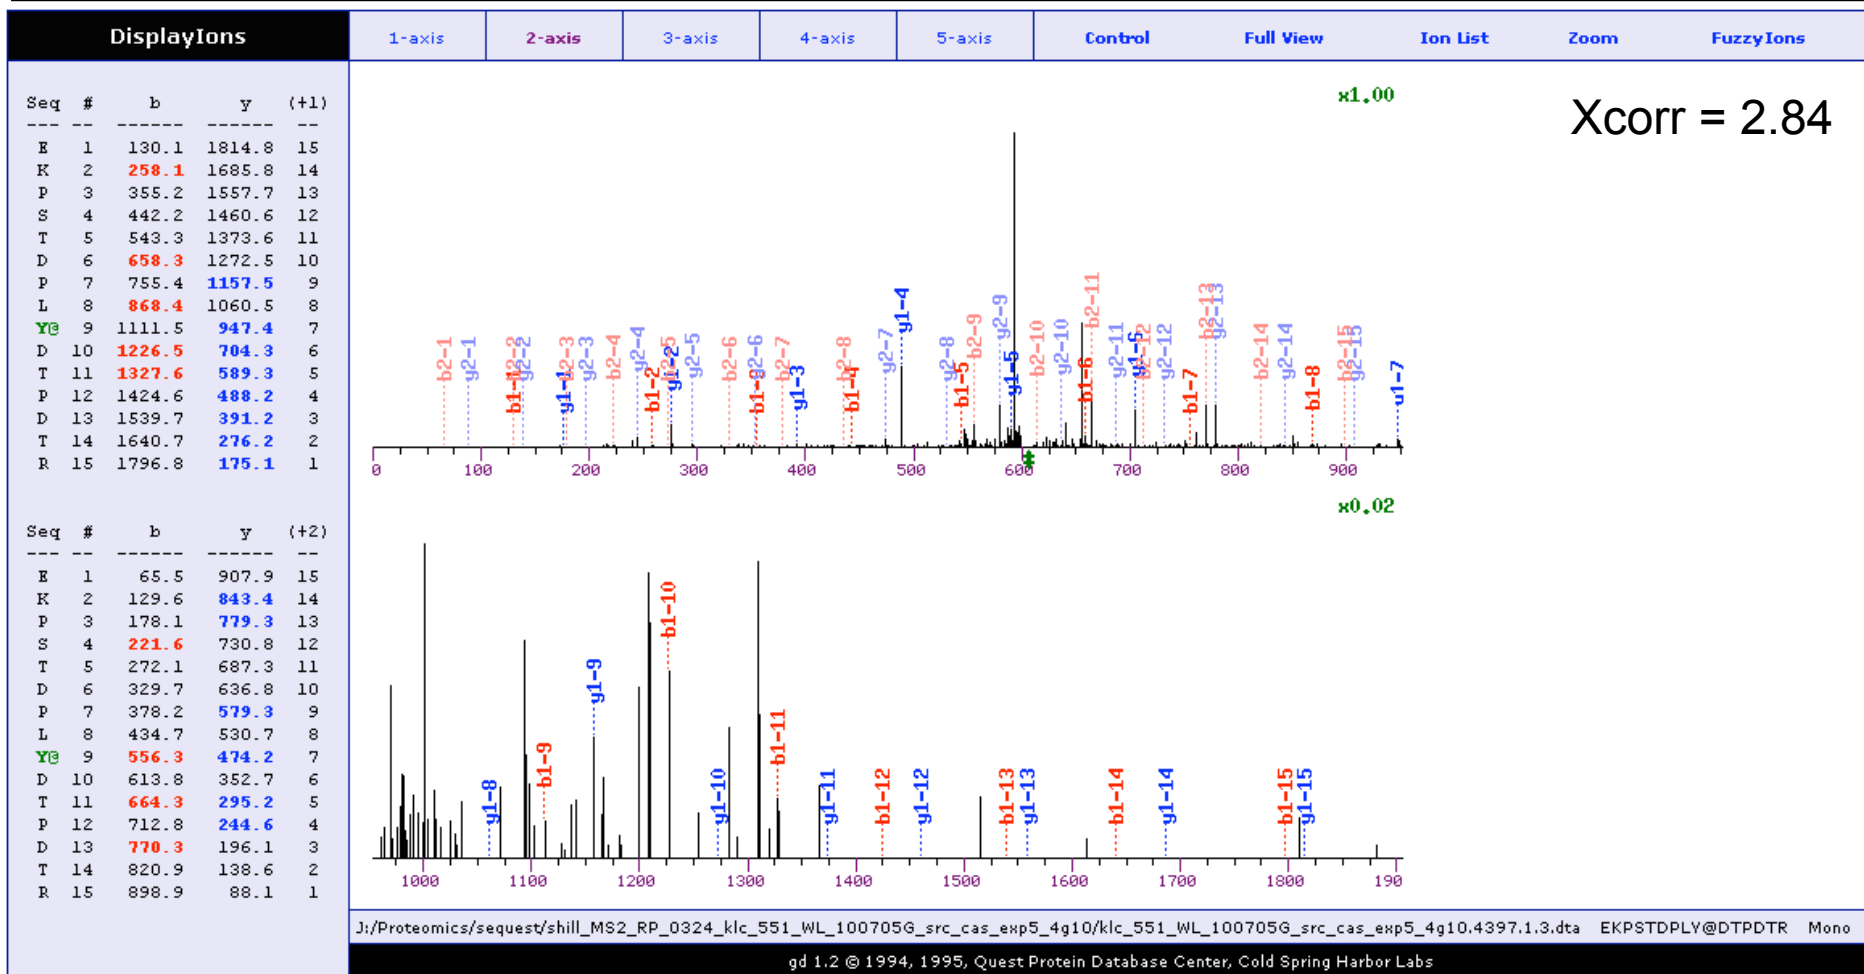

# RIN1 pY35 K.EKPSTDPLY@DTPDTR.G

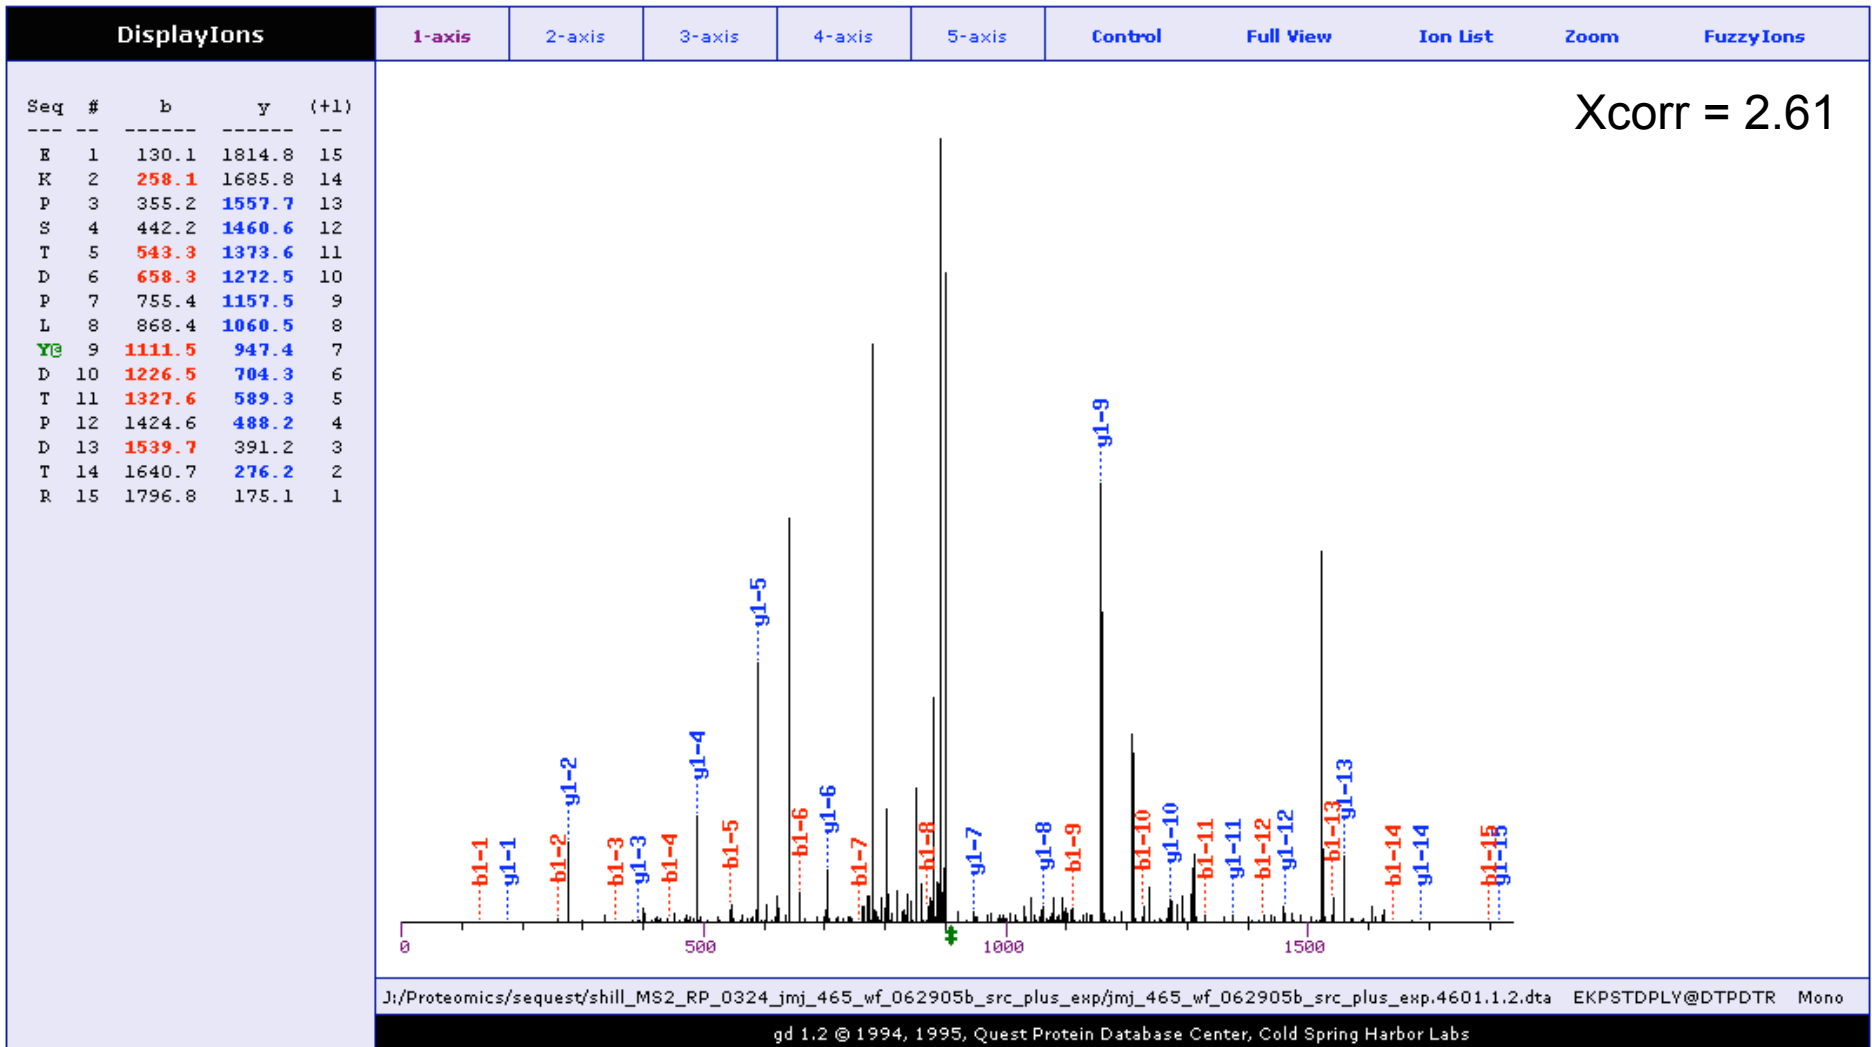

# Annexin A2 pY23 L.SLEGDHSTPPSAY@GSVKPY.T

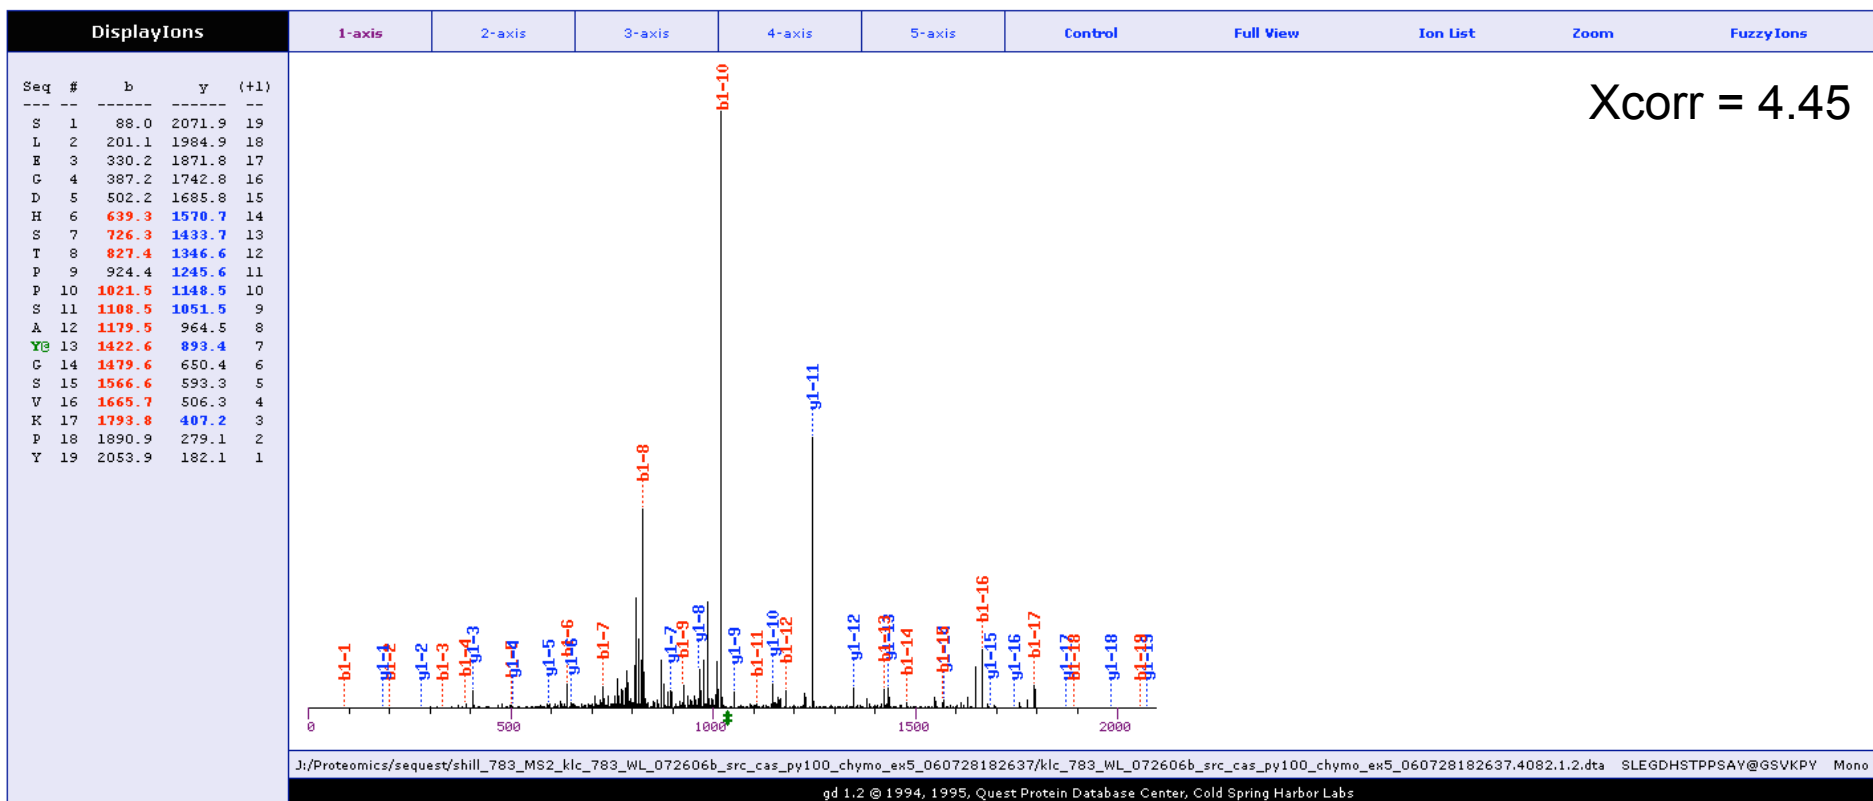

# Annexin A2 pY23

L.SLEGDHSTPPSAY@GSVKPY.T

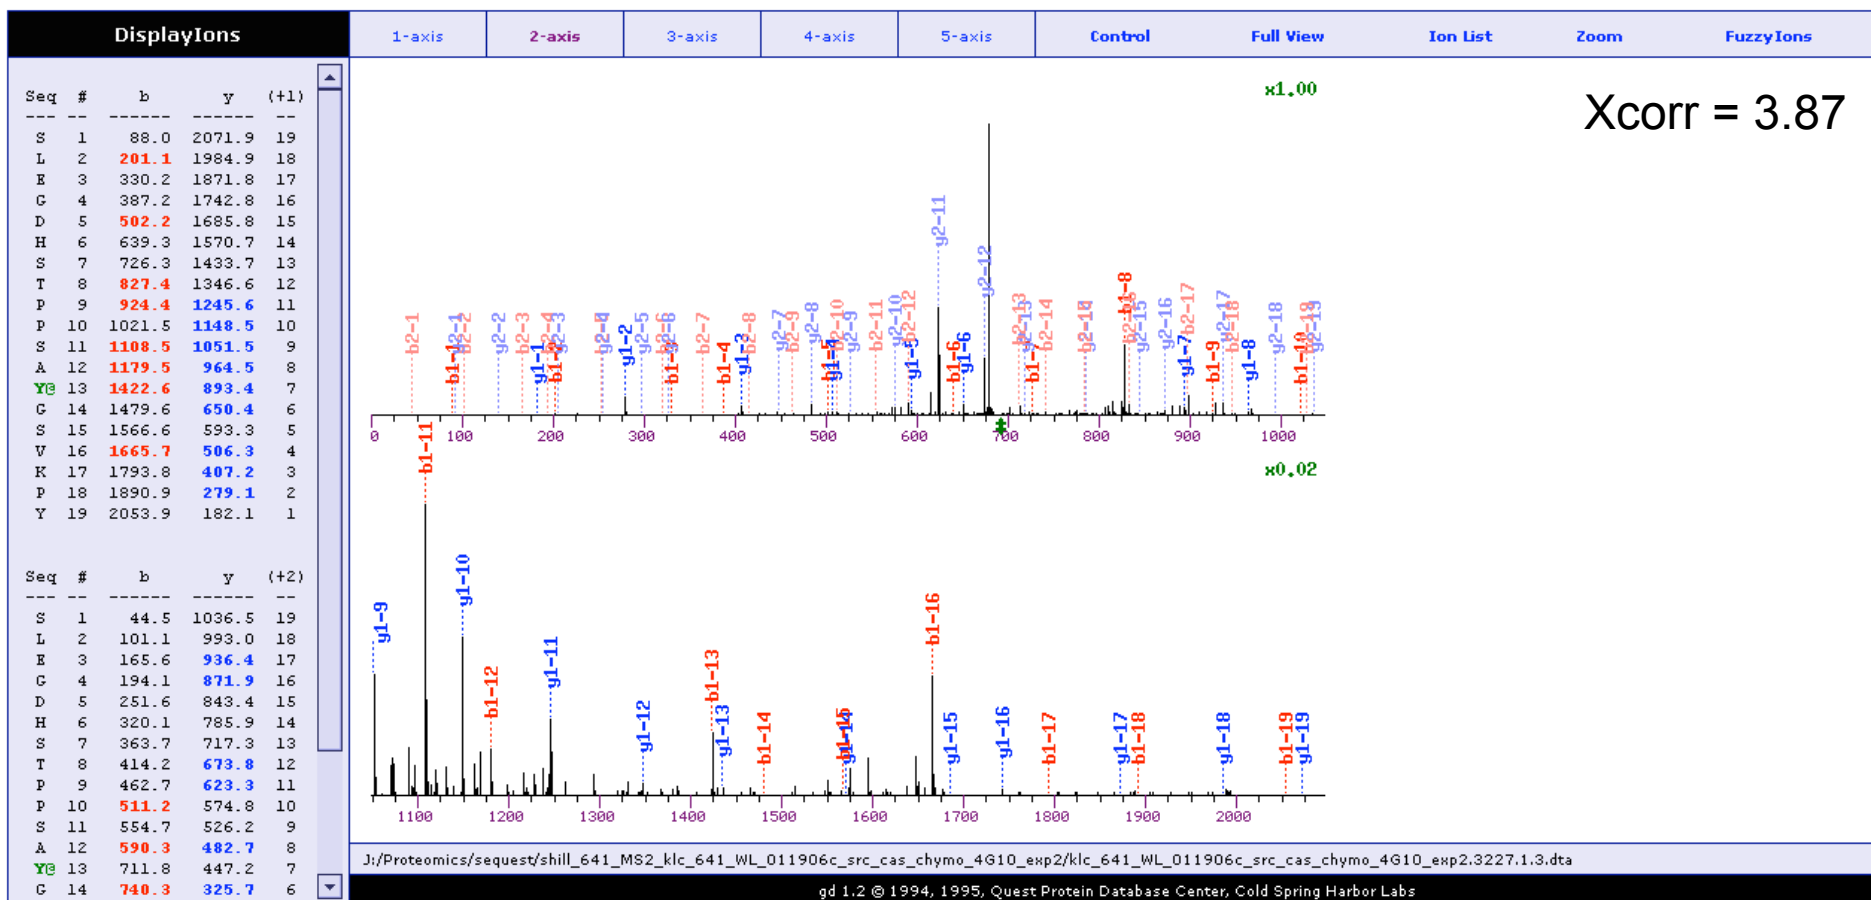

# Annexin A2 pY23

K.LSLEGDHSTPPSAY@GSVKPYTNFDAER.D

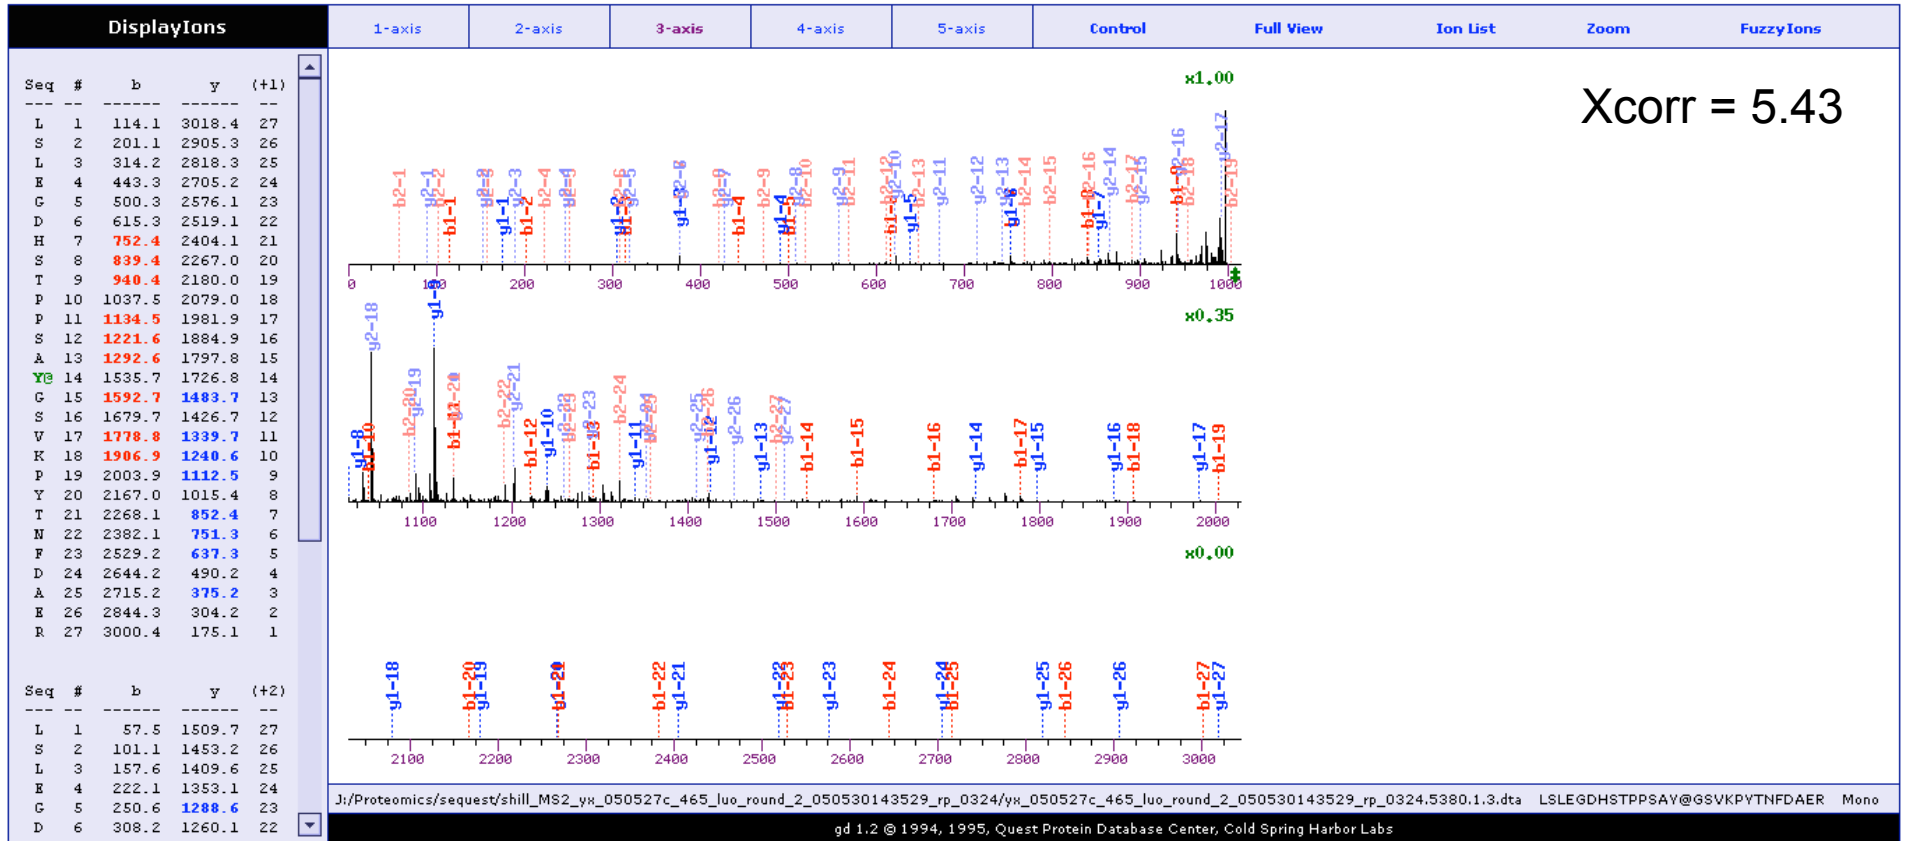

# ANKS1/Odin pY471 R.IQSSAPQEEEEHPY@ELLLTAETKK.L

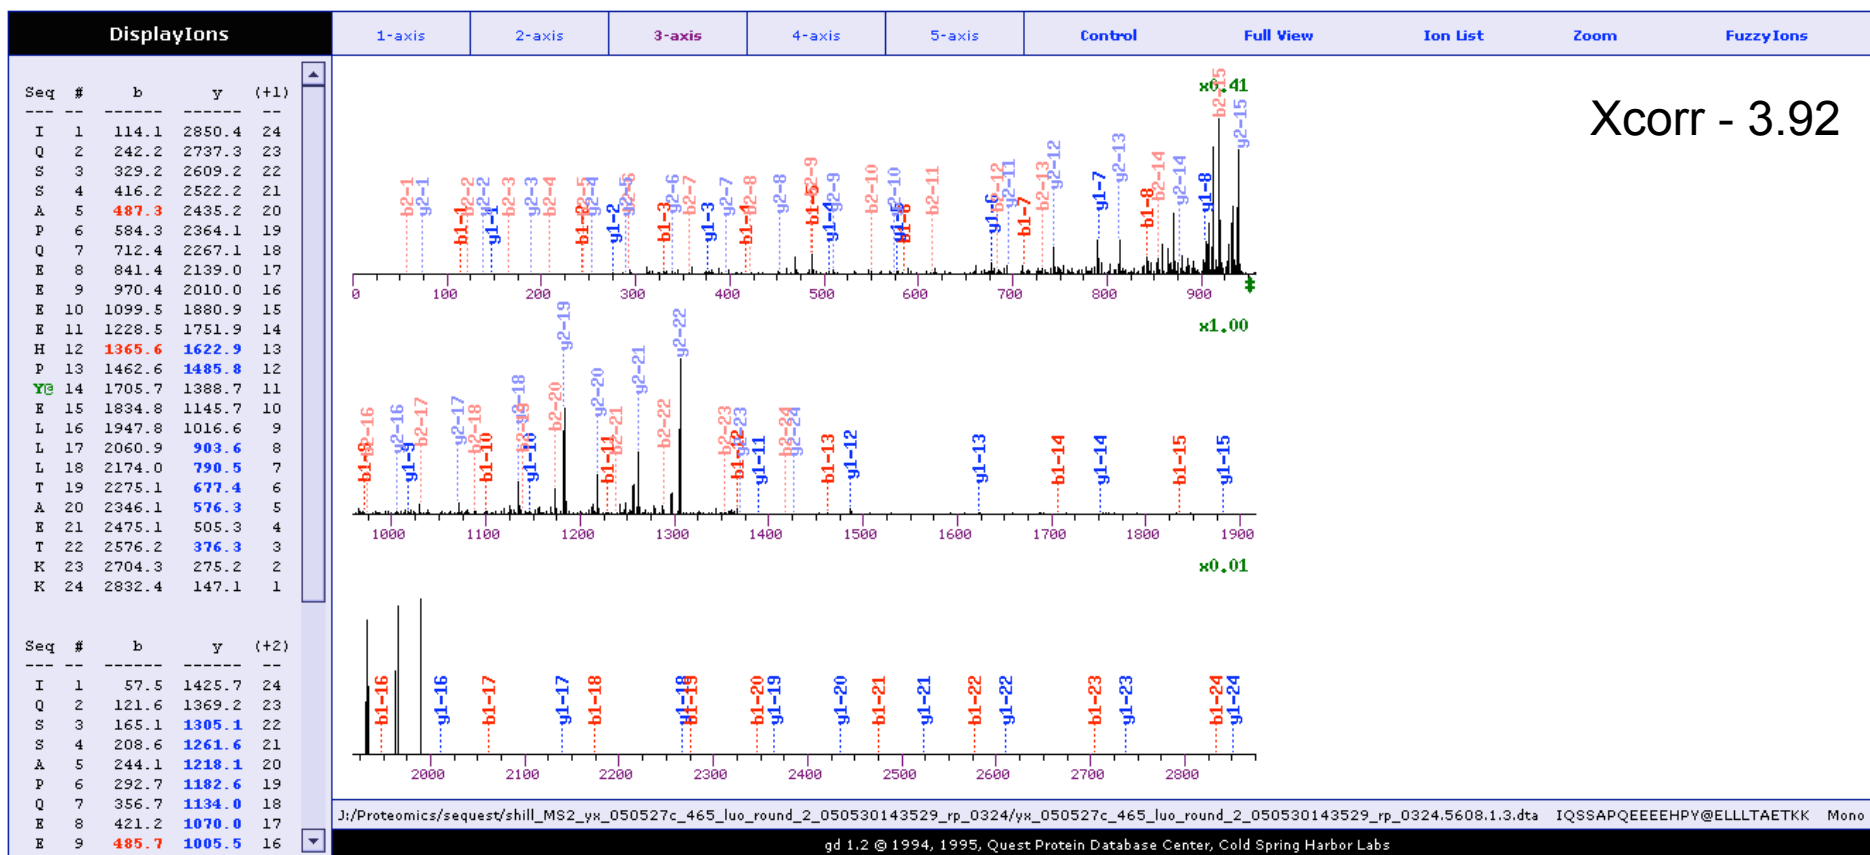



# ANKS1/Odin pY471 R.IQSSAPQEEEEHPY@ELLLTAETK.K

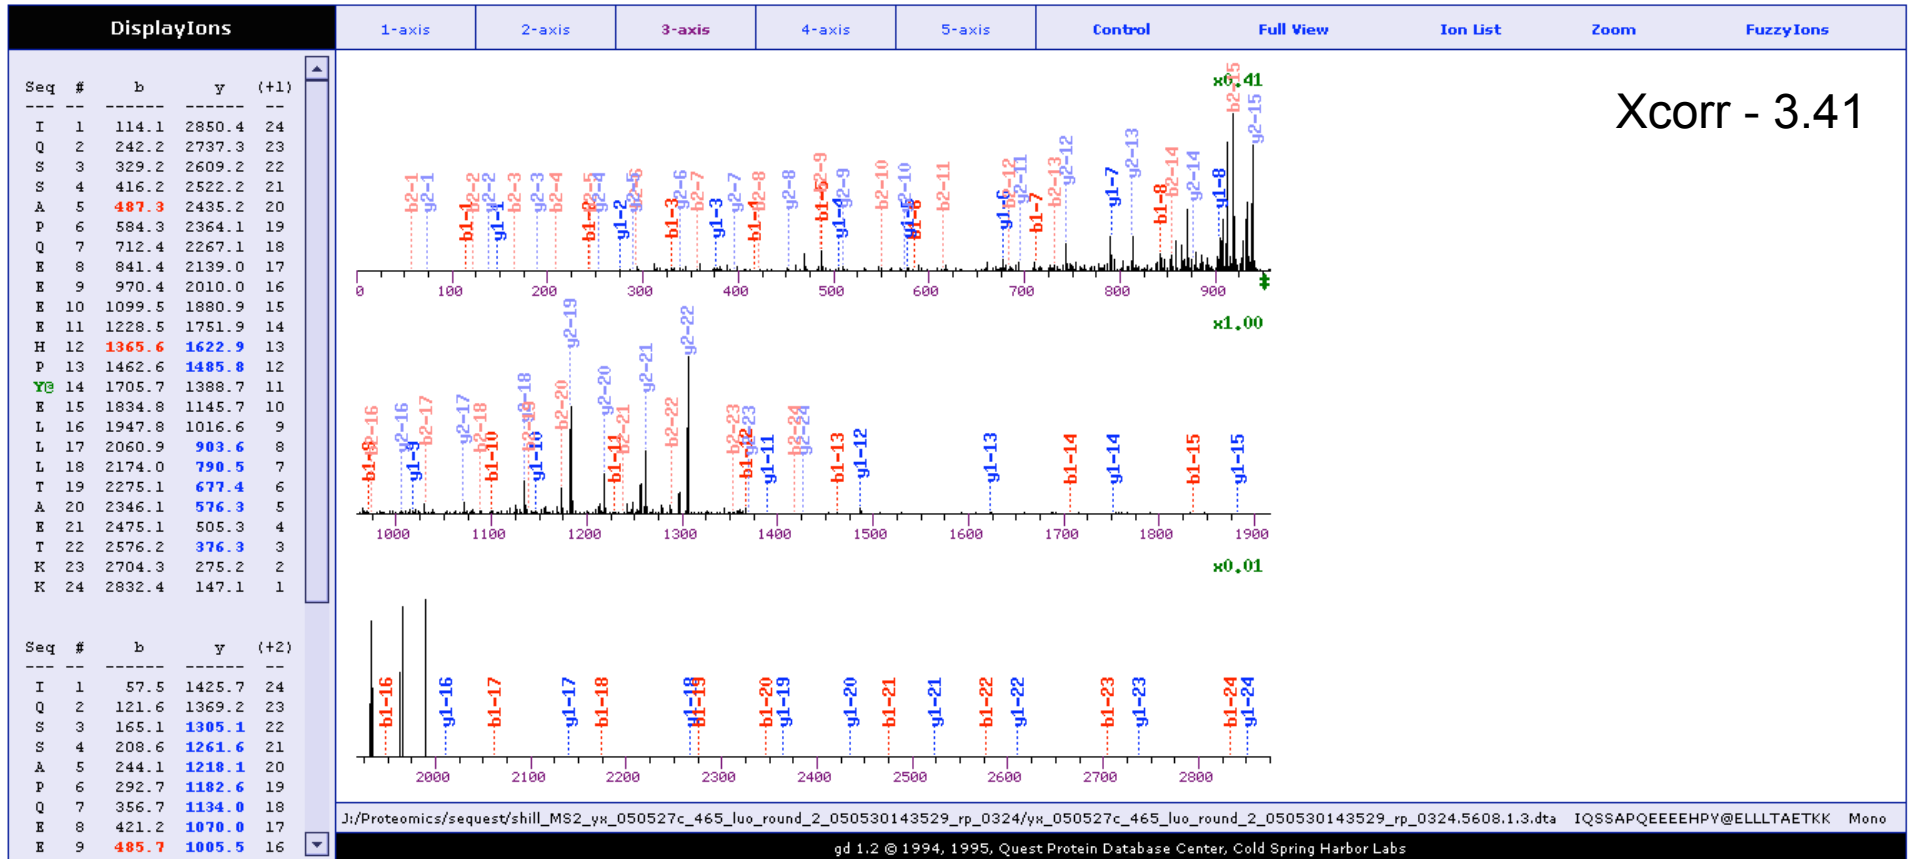

# ANKS1/Odin pY471 L.AVRPRIQSSAPQEEEEHPY@ELL.L.T

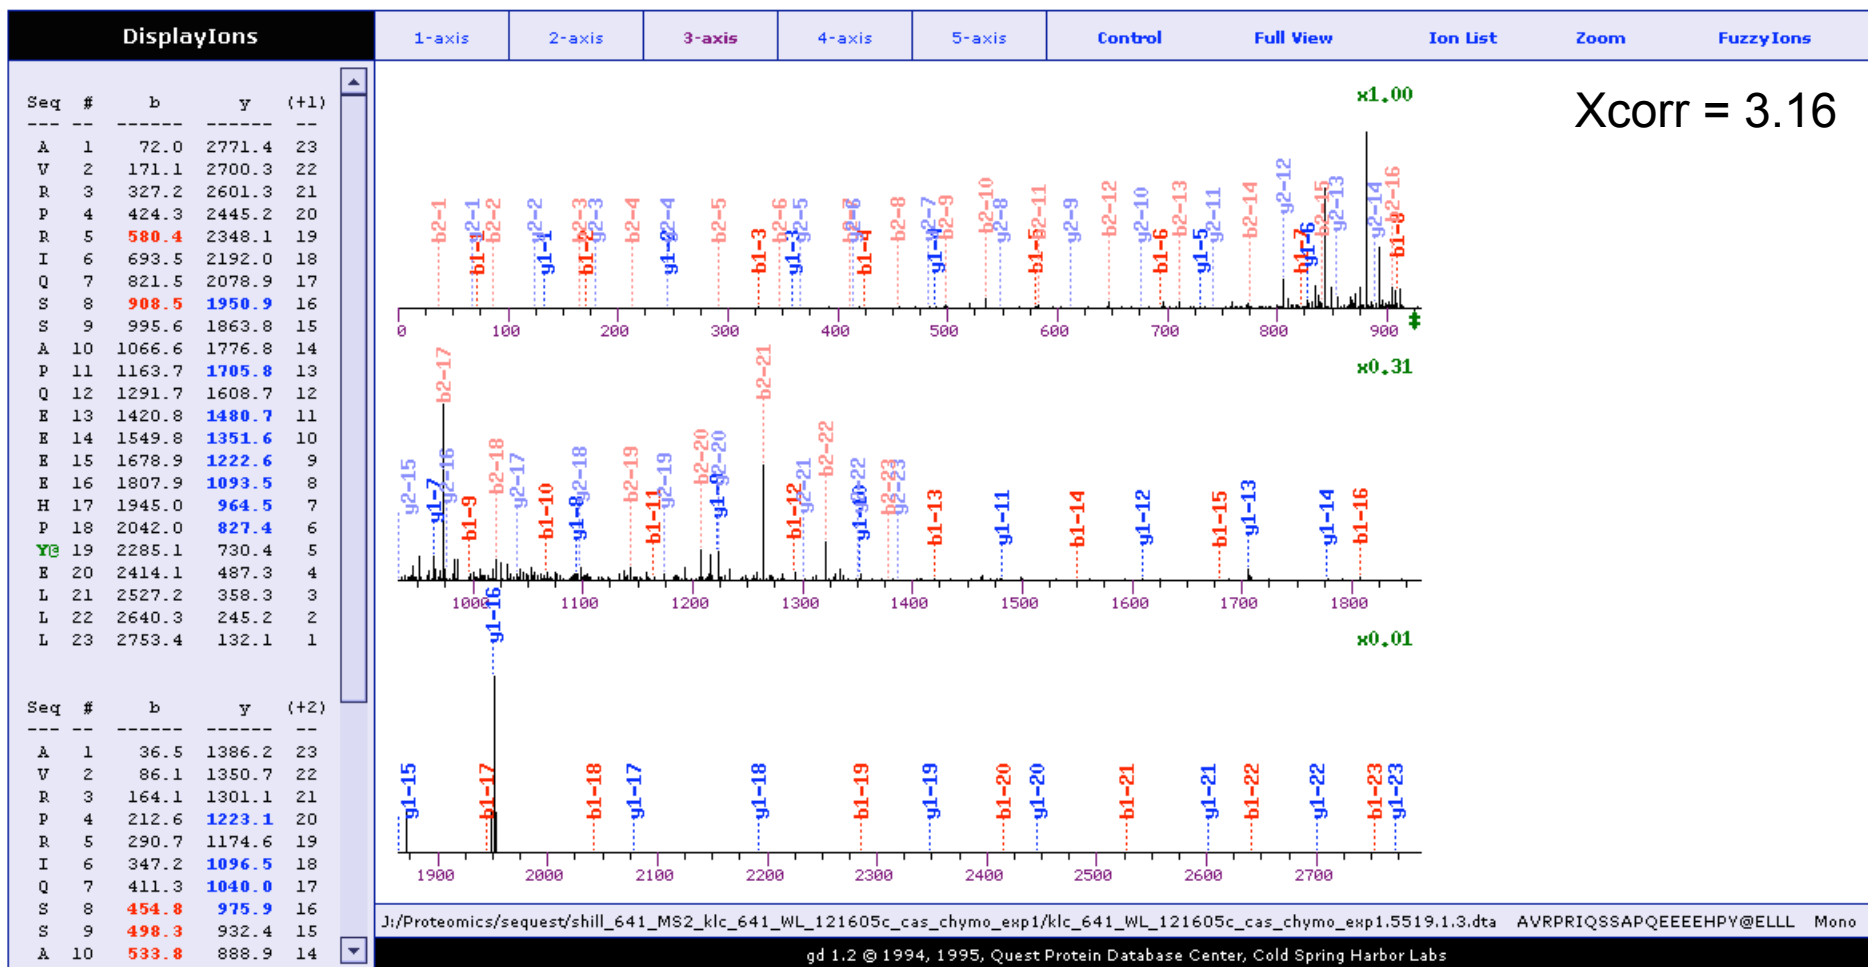

# ANKS1/Odin pY471 L.AVRPRIQSSAPQEEEEHPY@ELL.L

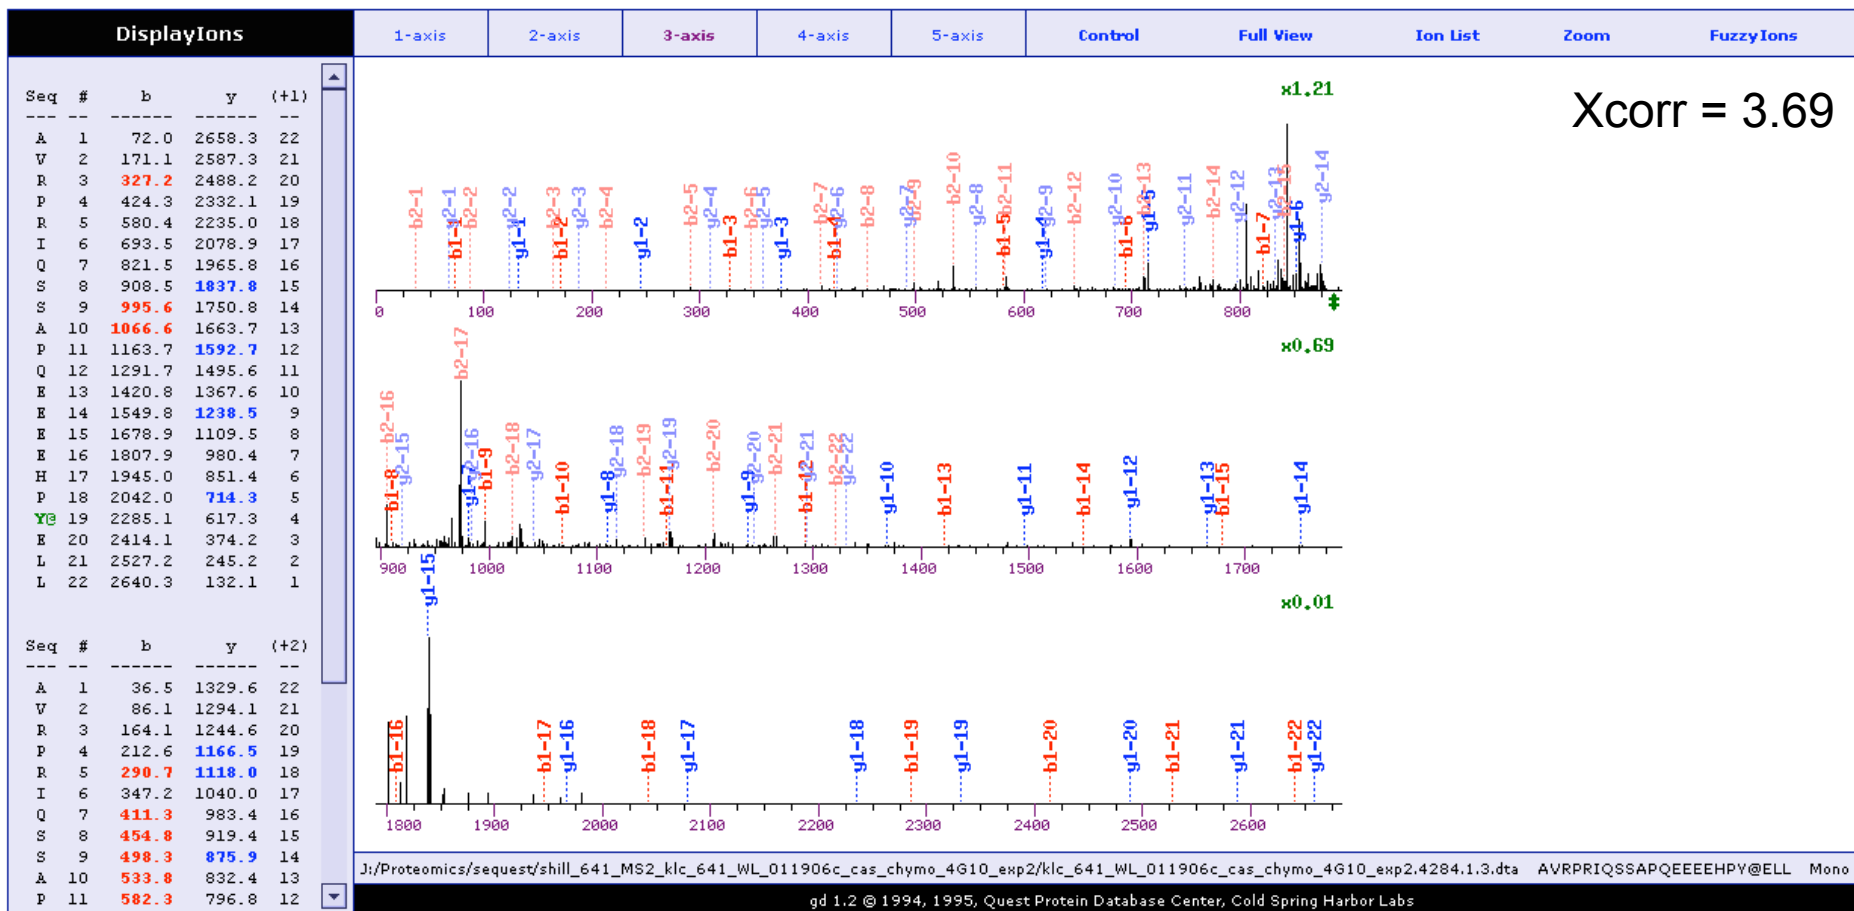

ANKS1/Odin pY471

L.AVRPRIQSSAPQEEEEHPY@EL.L

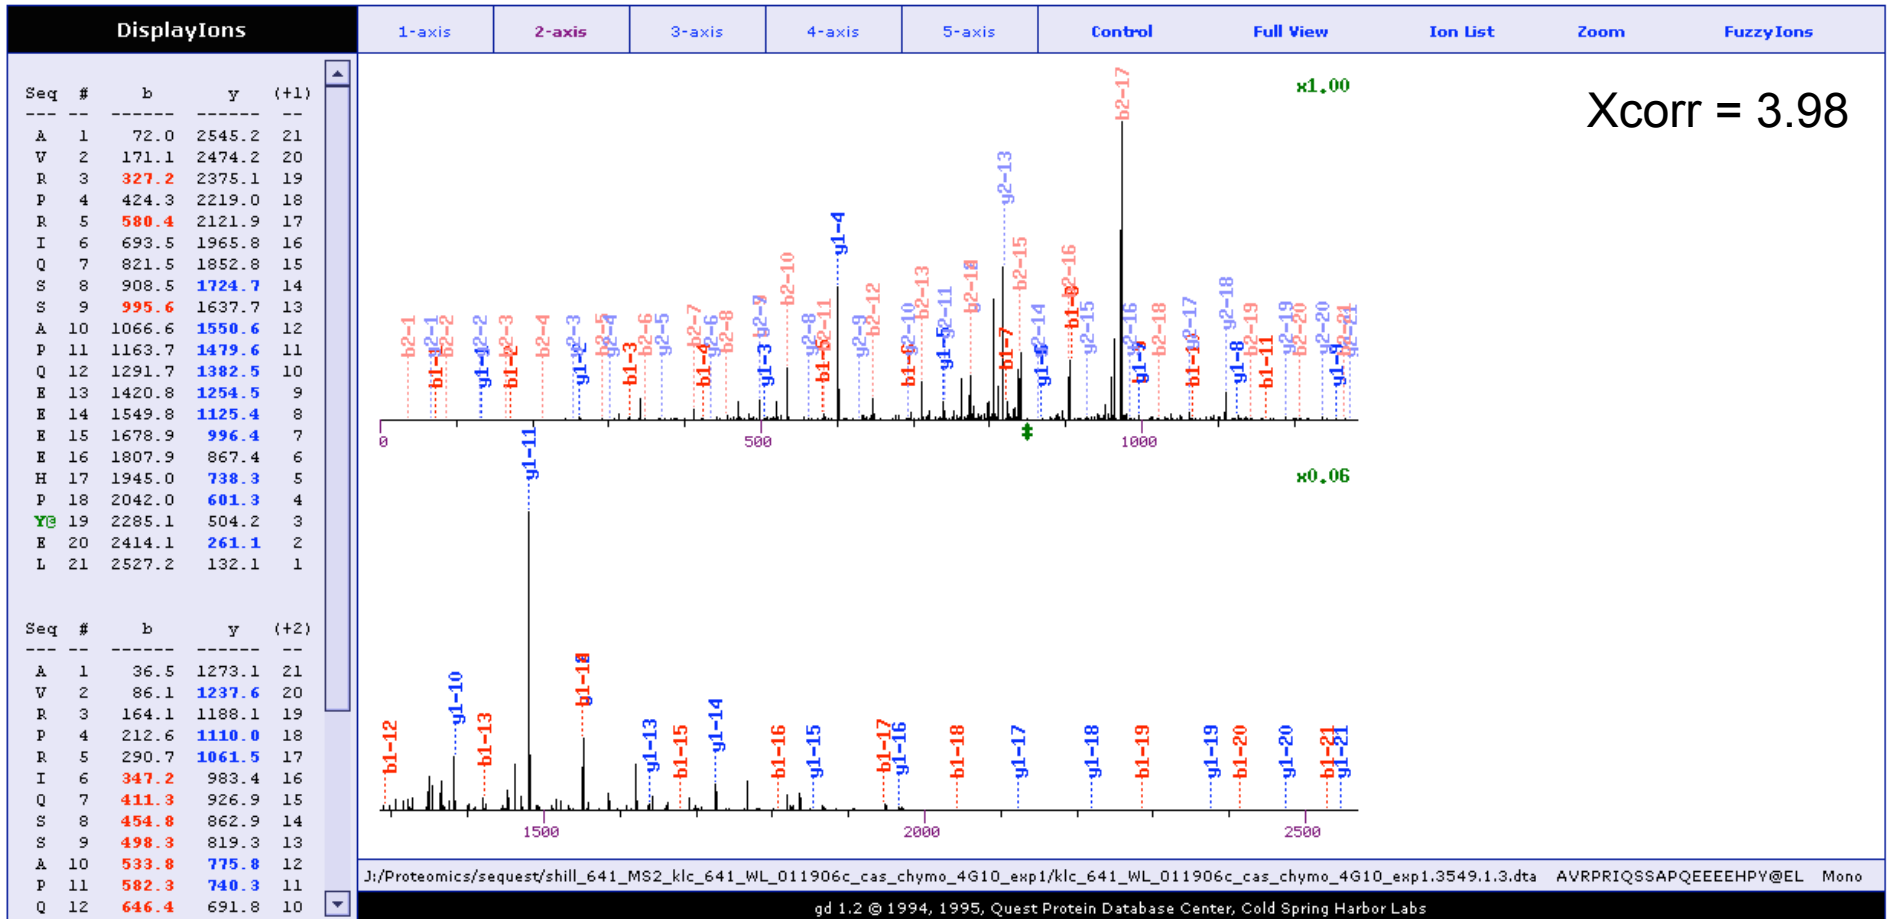

# ANKS1/Odin pY471 L.AVRPRIQS@SAPQEEEEHPY@ELL.L

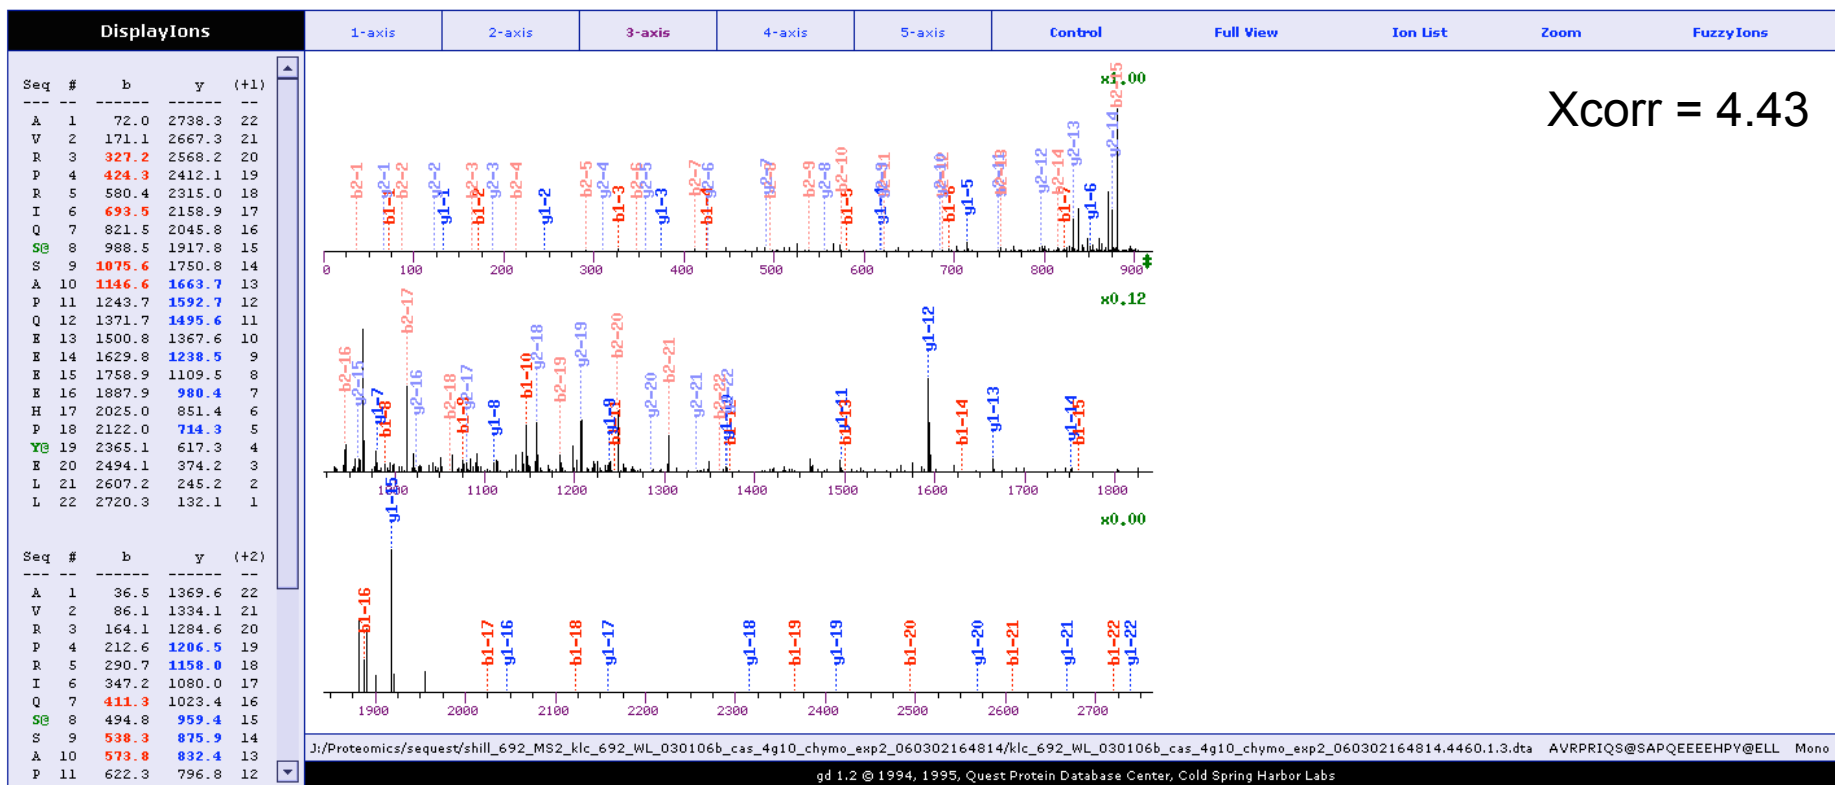

# ANKS1/Odin pY471 L.AVRPRIQS@SAPQEEEEHPY@EL.L

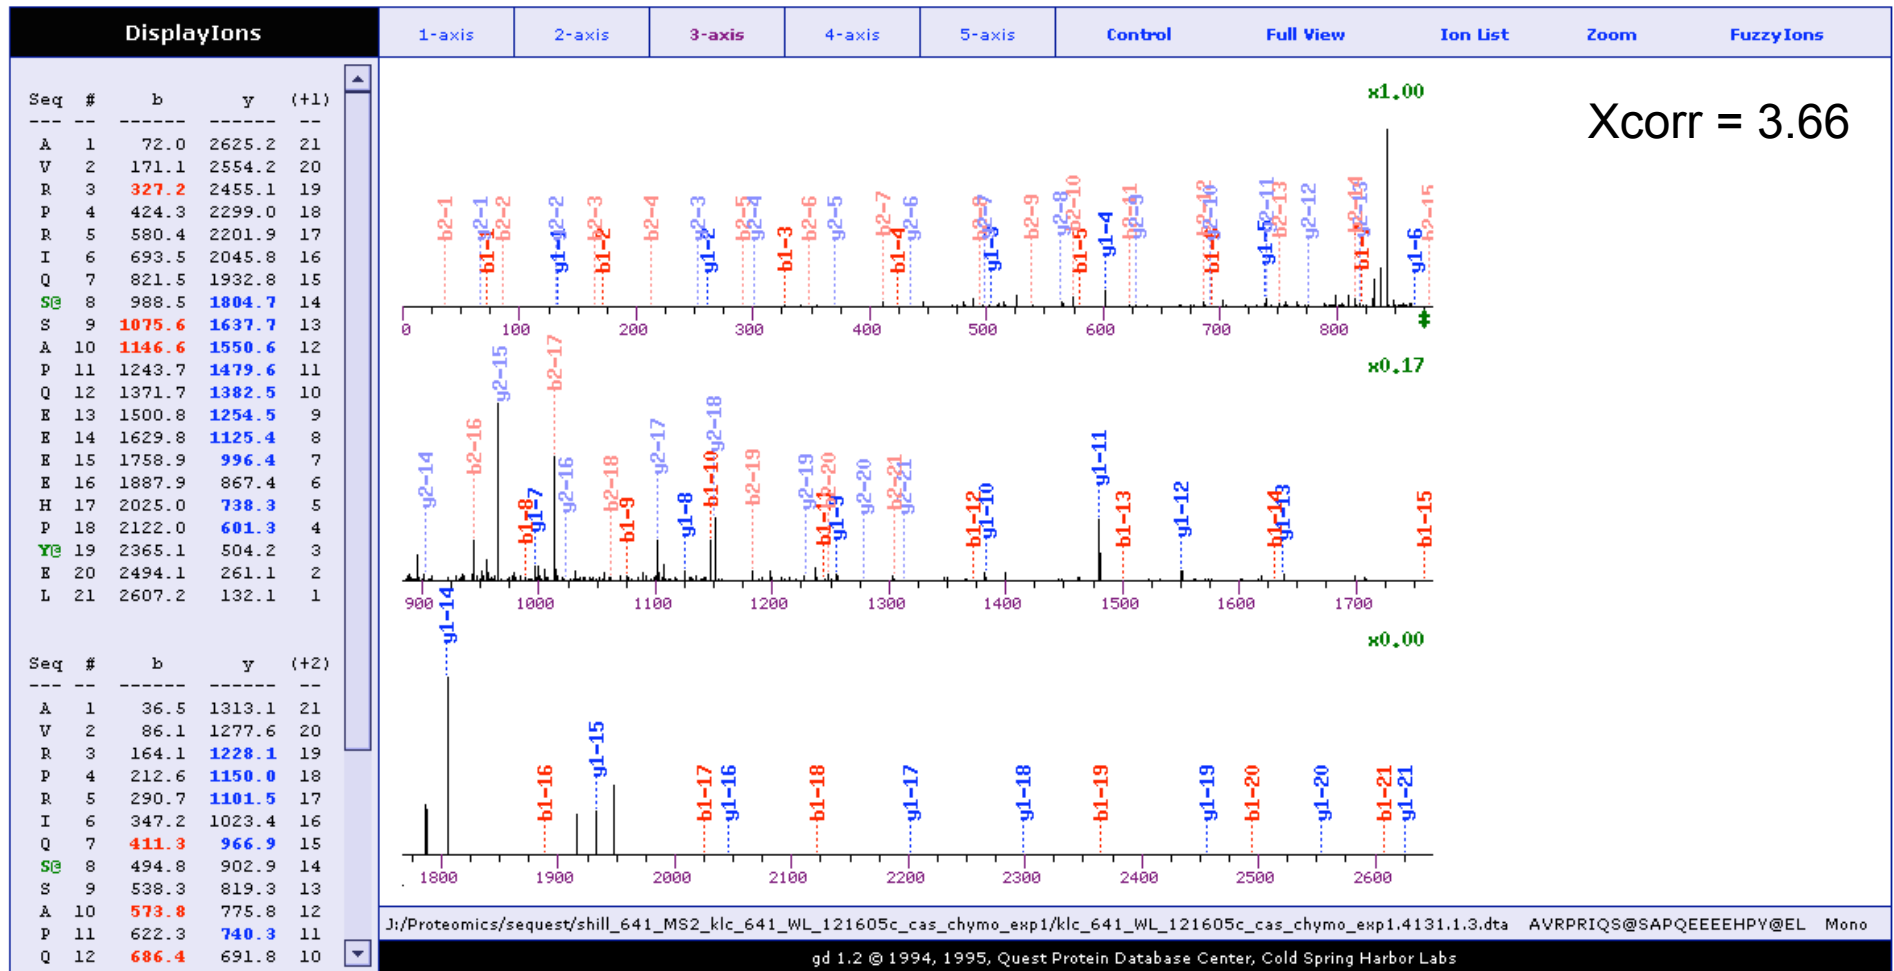

# Caveolin-1 pY14

K.YVDSEGHLY@TVPIR.E

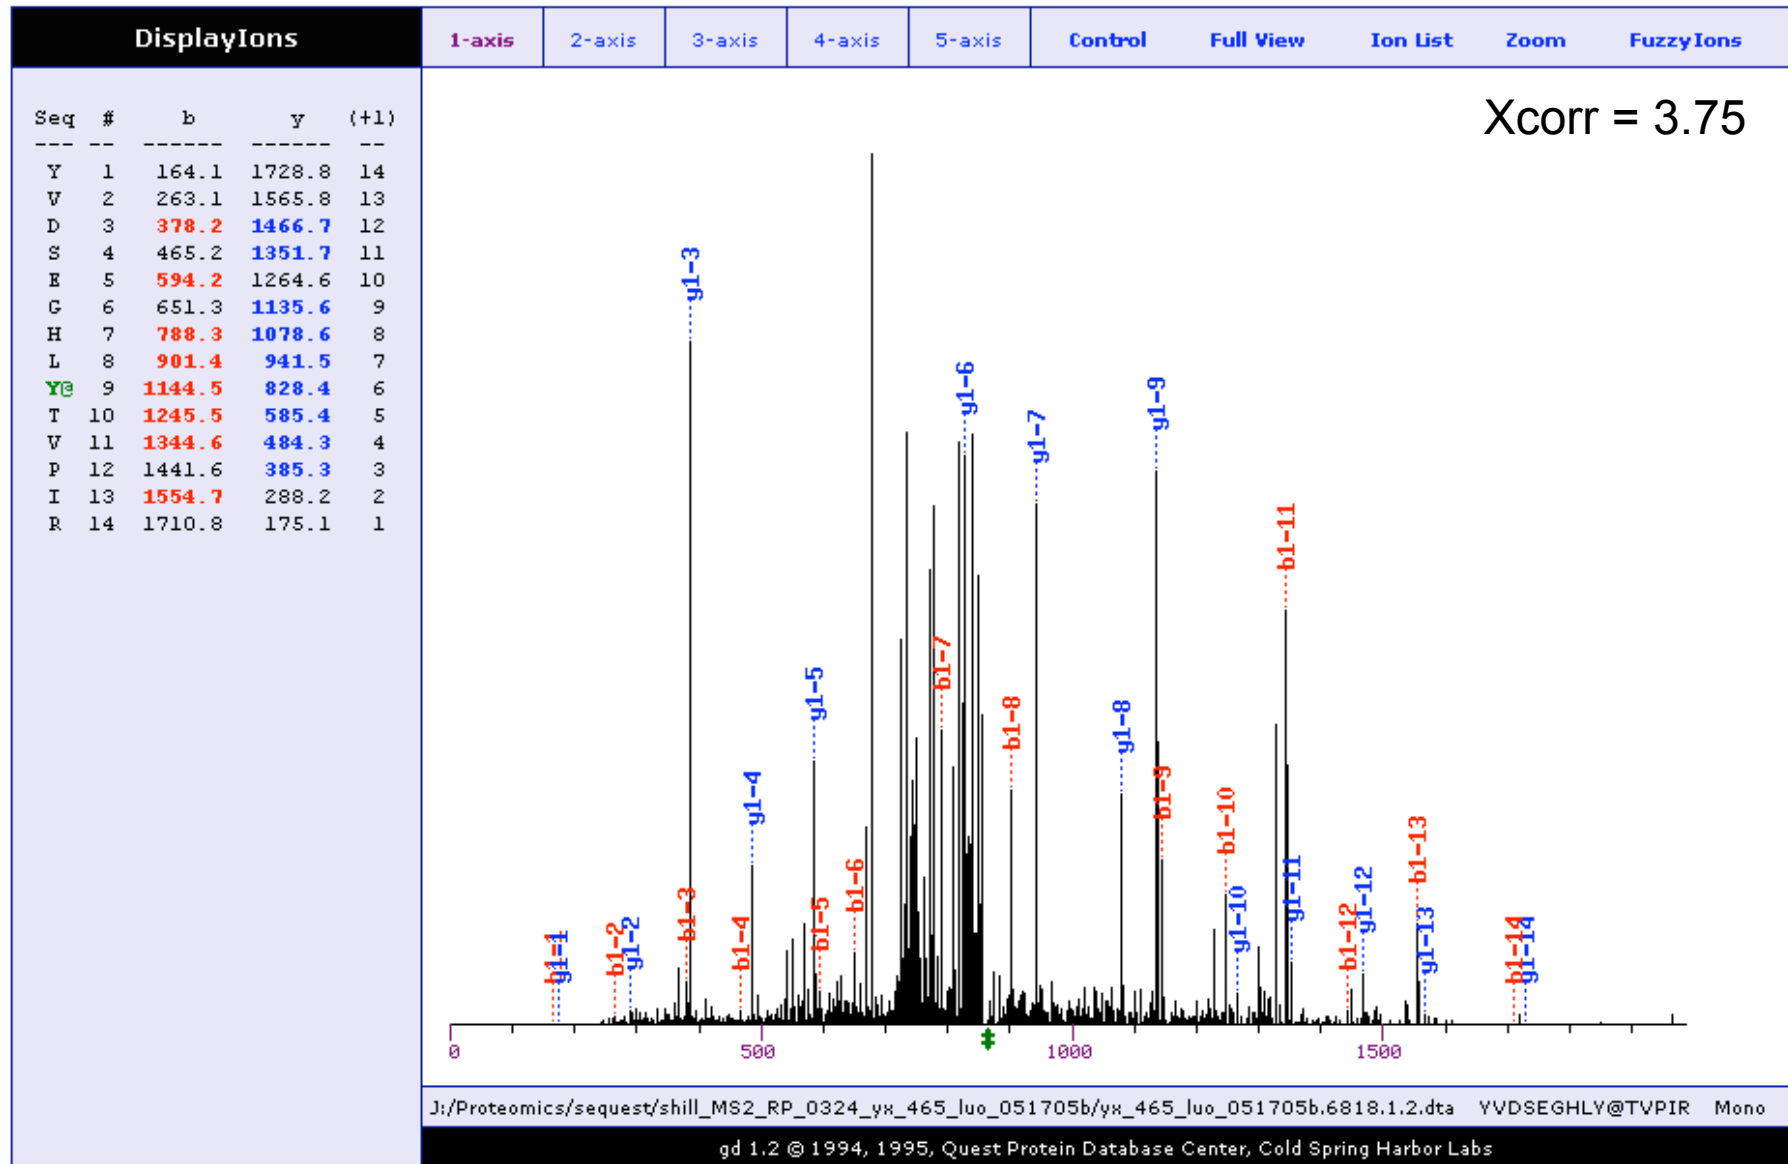

Dok1 pY314

R.IPPGPSQDSVY@SDPLGSTPAGAGEGVHSK.K

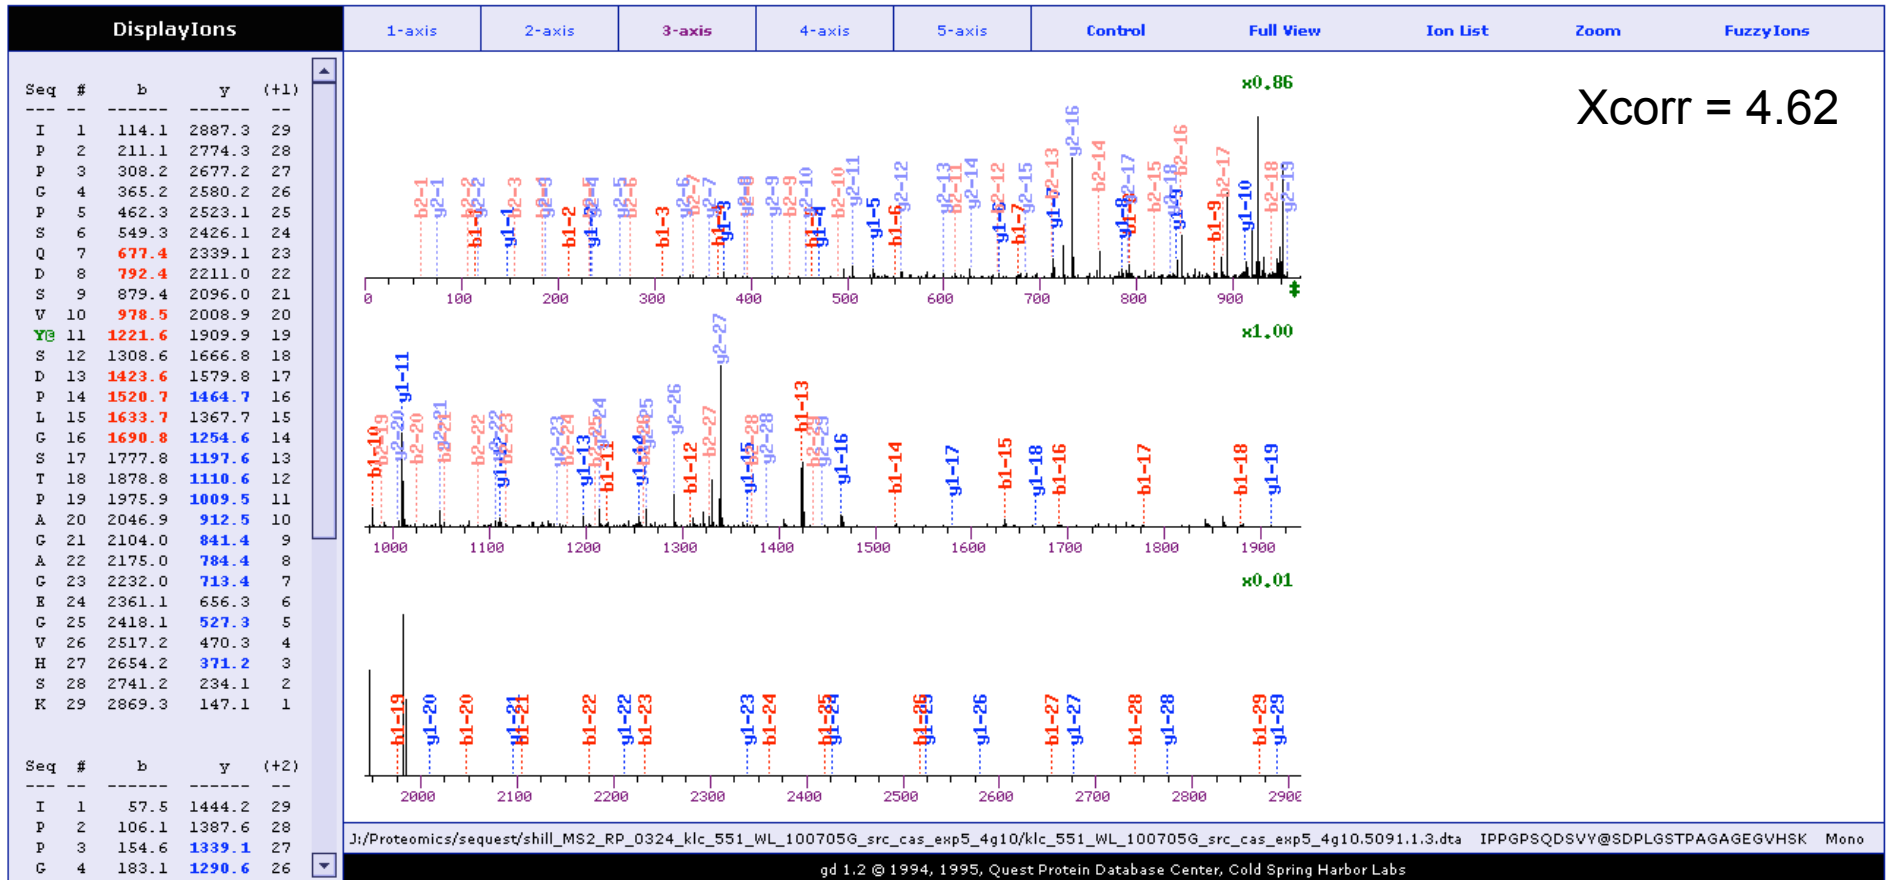



Dok1 pY361

L.LKTKLTDSDKEDPIY@DEPEGLAPAPRGLY.D

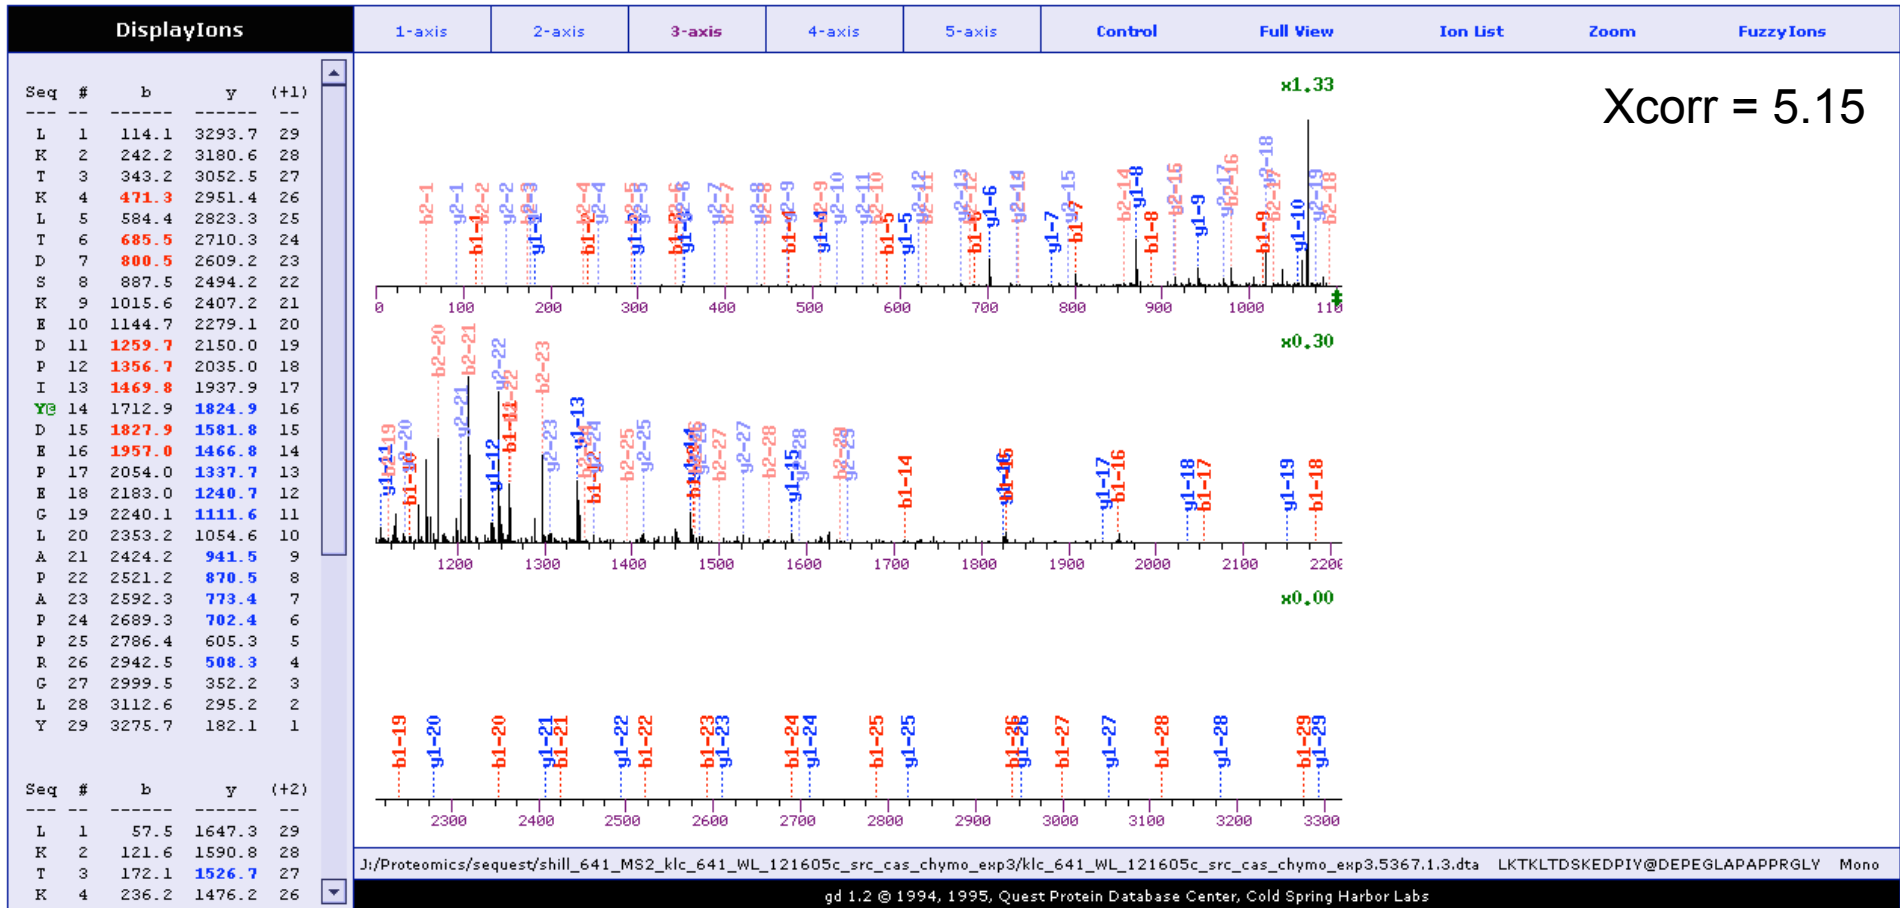

Dok1 pY361

K.TKLTDSKEDIY@DEPEGLAPAPP.R.G

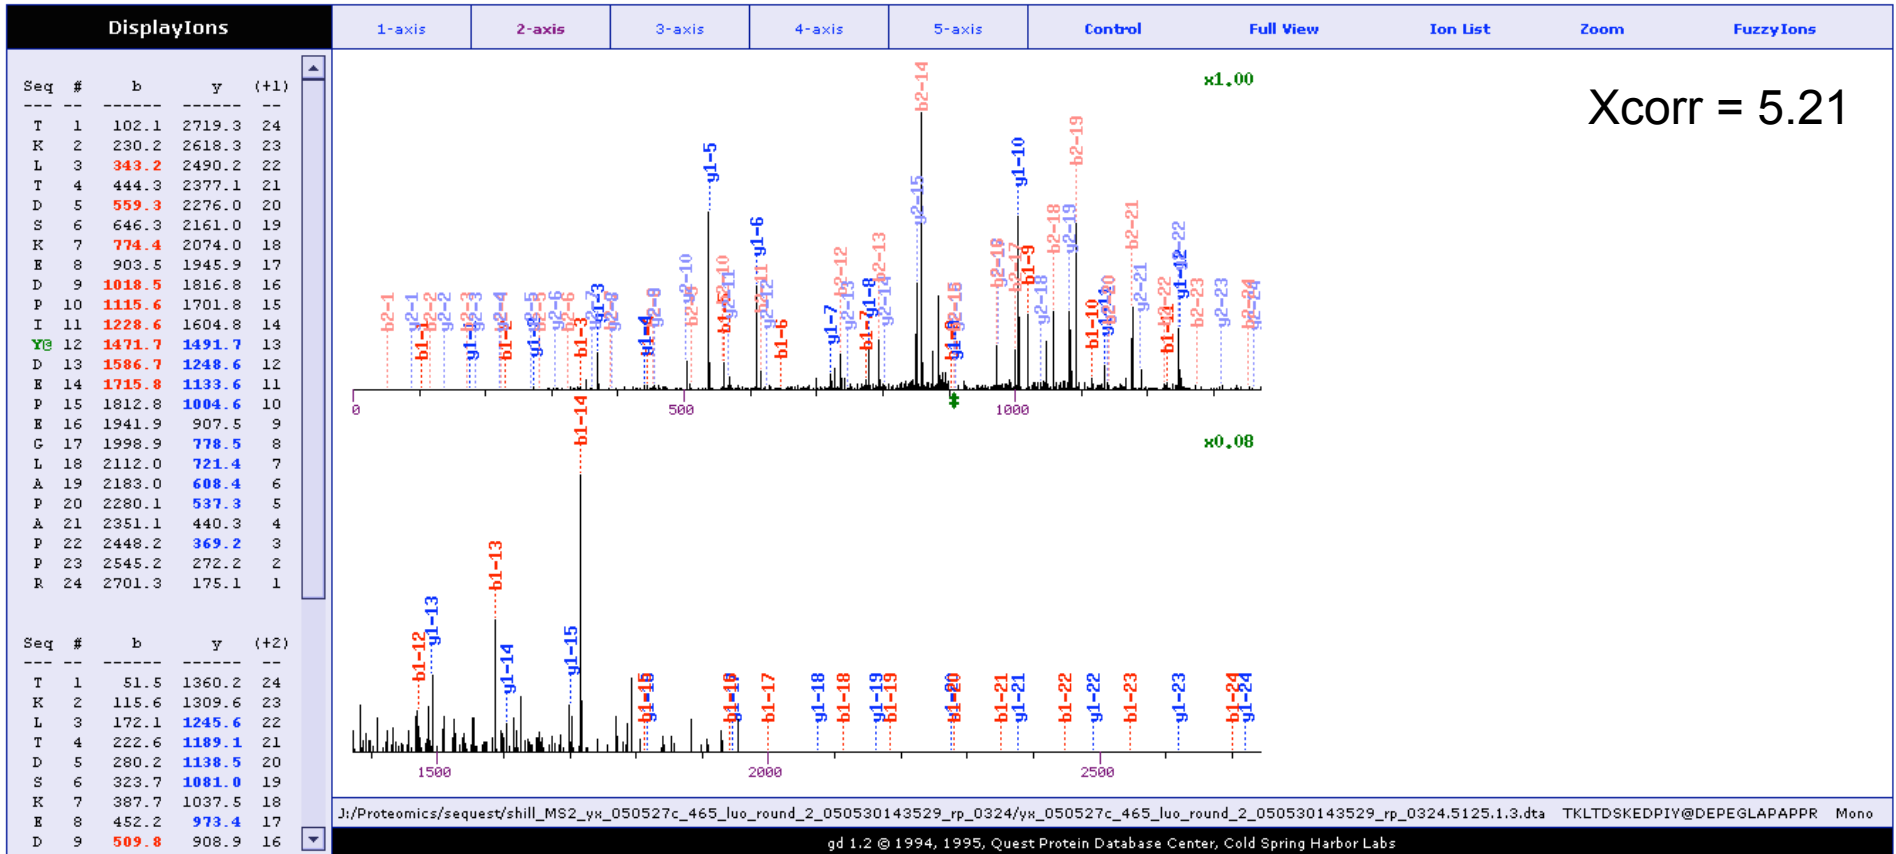

Dok1 pY361

K.LTDSKEDIY@DEPEGLAPAPRGLY@DLPQEPR.D

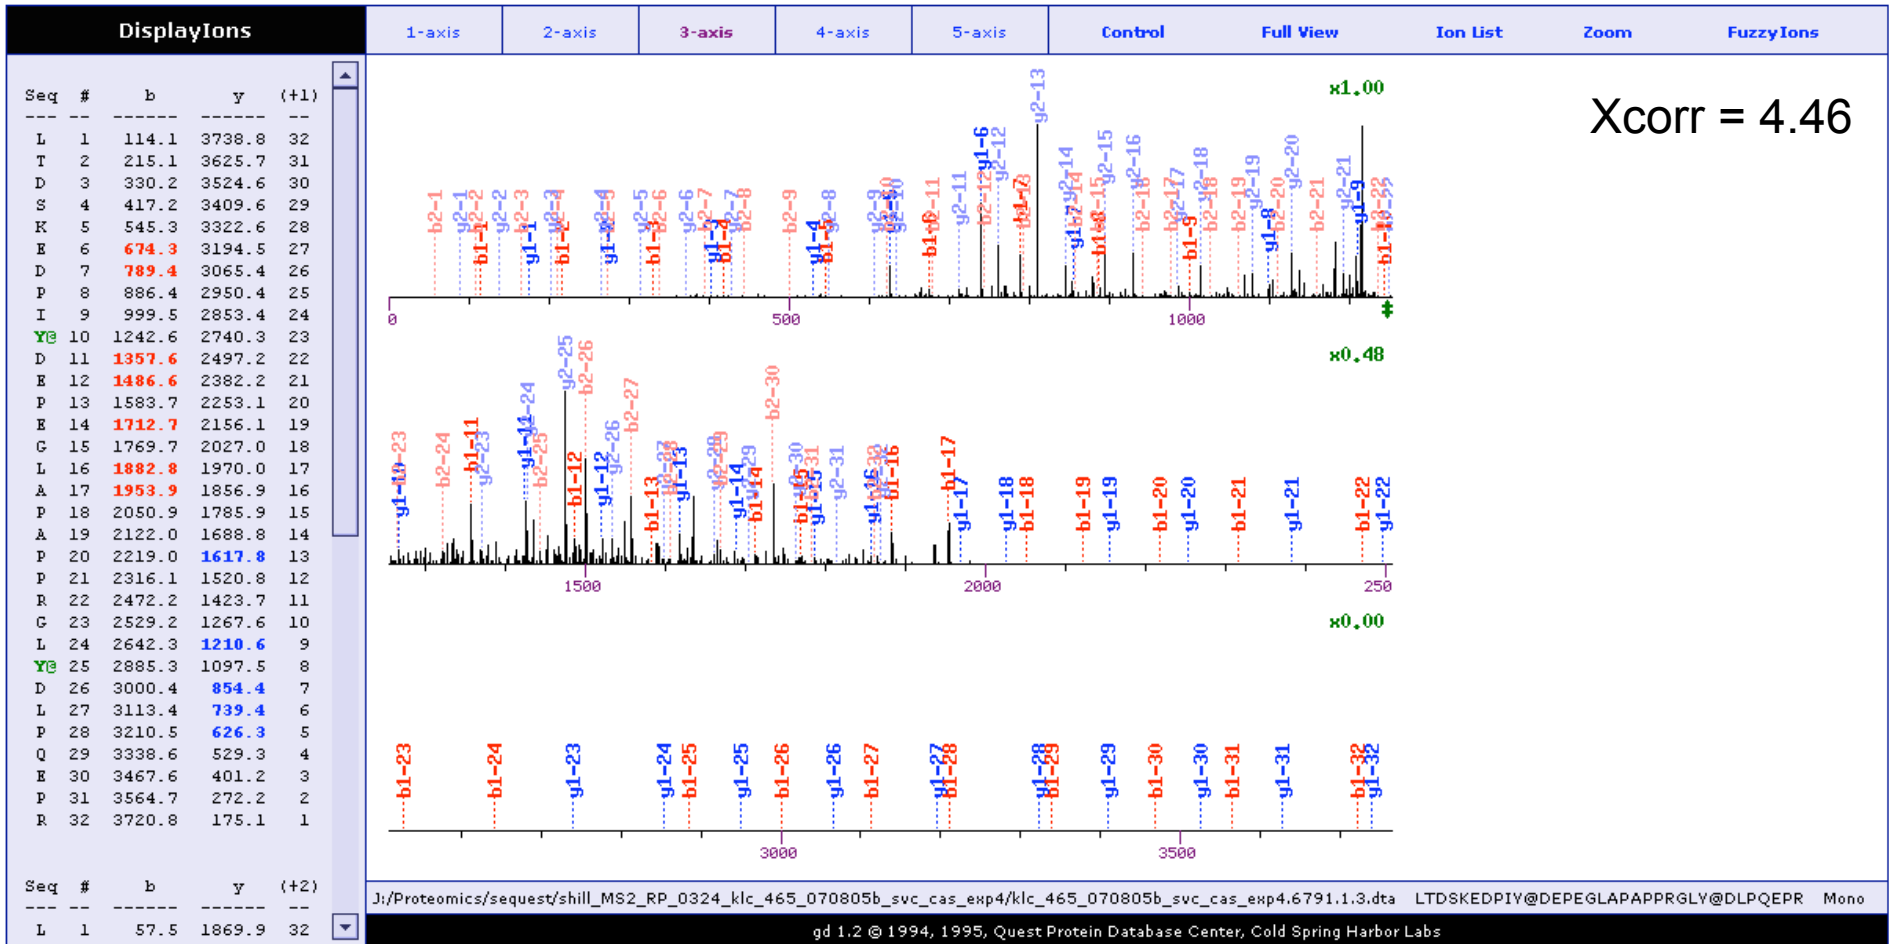

Dok1 pY361

K.LTDSKEDIY@DEPEGLAPAPR.G

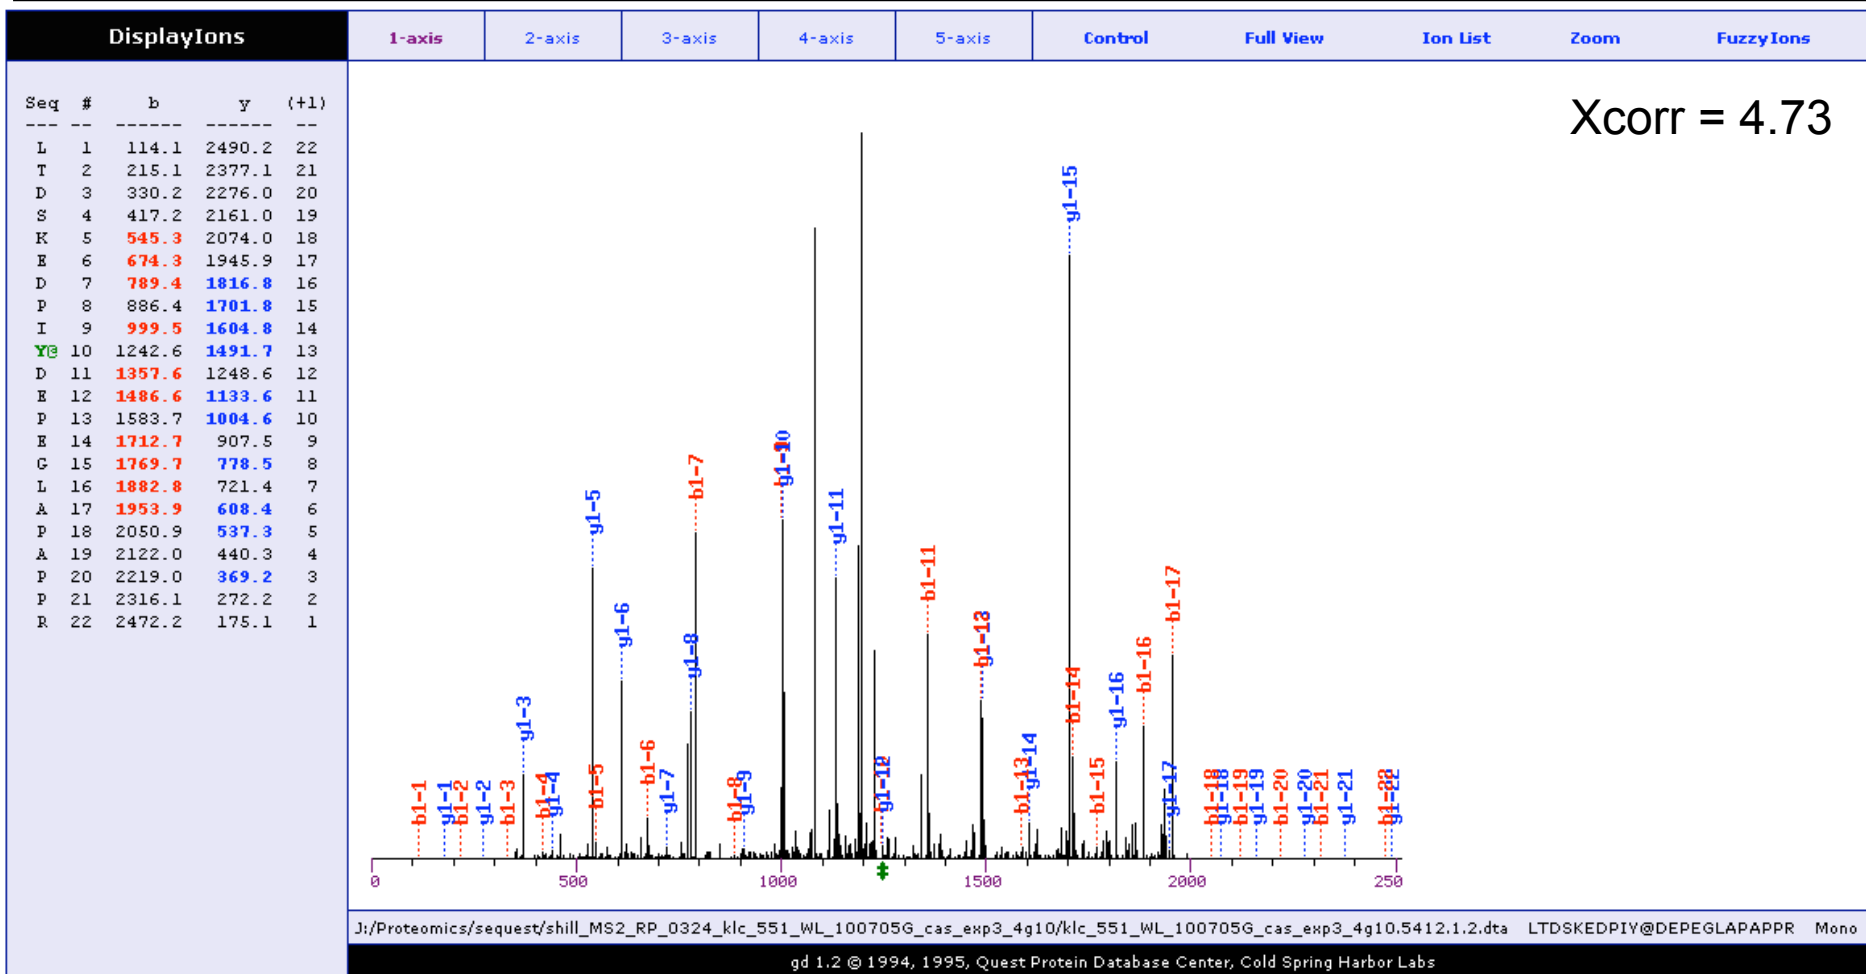

Dok1 pY361

K.LTDSKEDIY@DEPEGLAPAPR.G

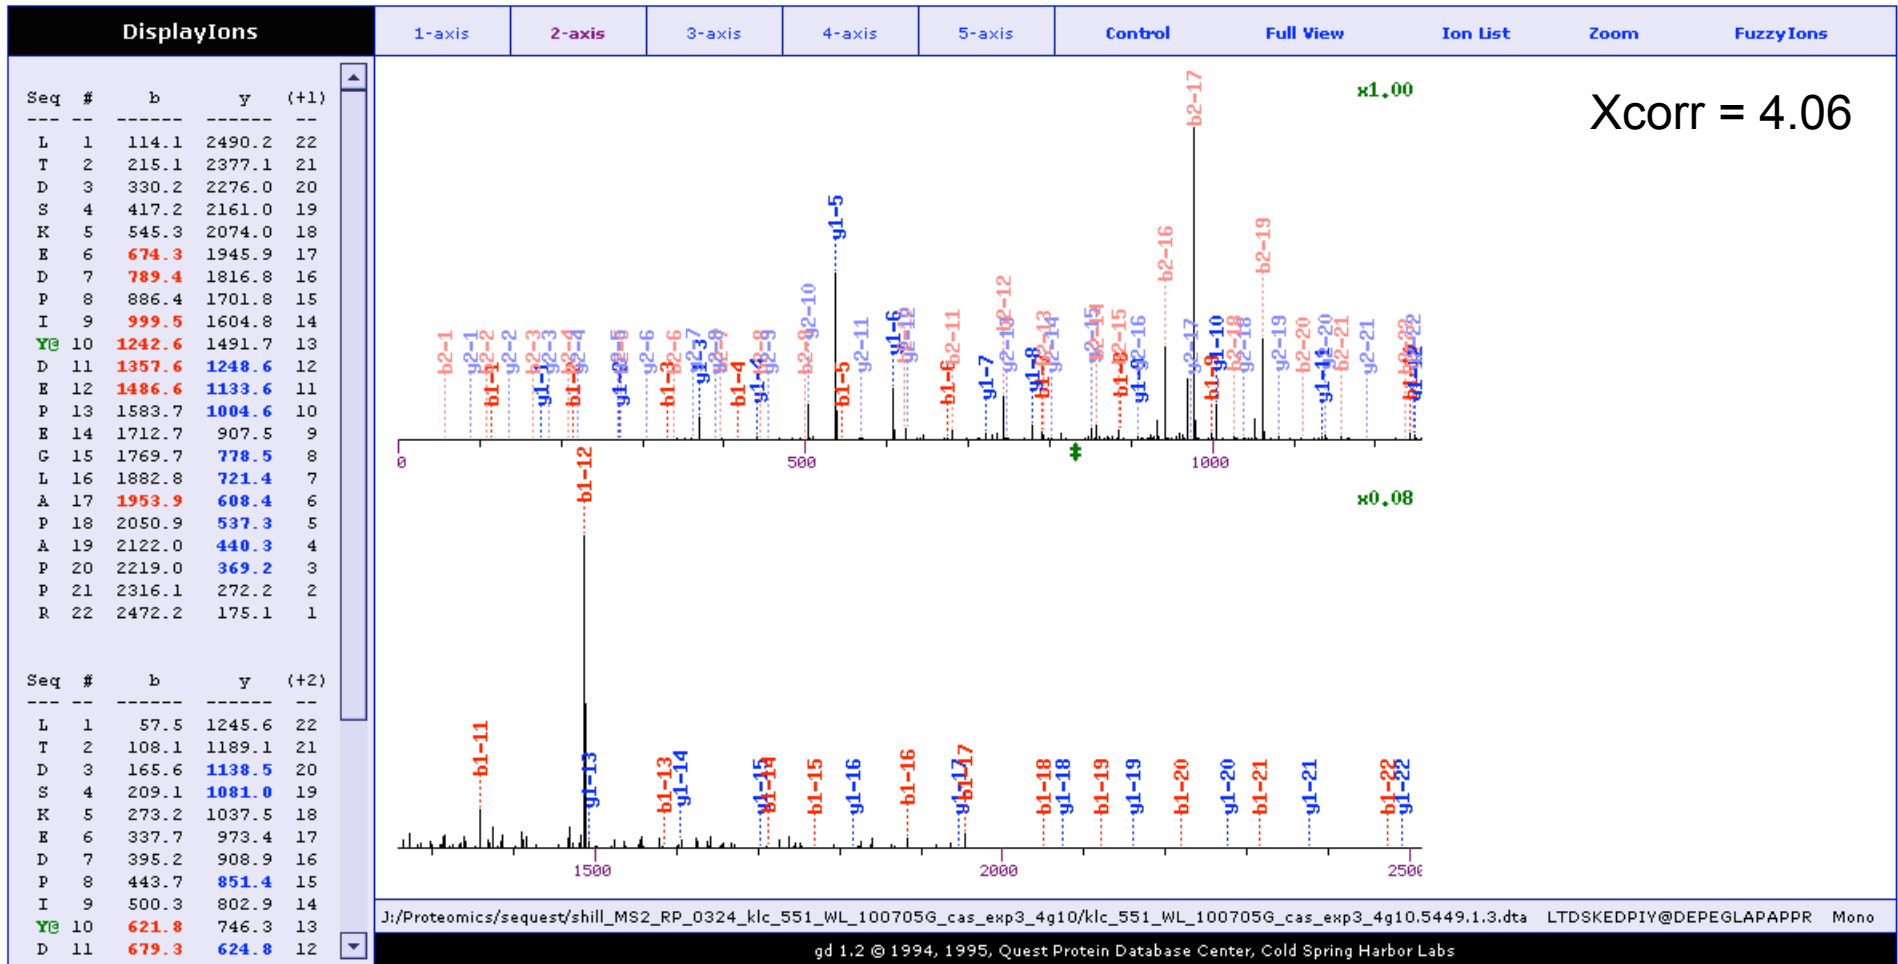

Dok1 pY408

R.LKEEGYELPYNPATDDY@AVPPPR.S

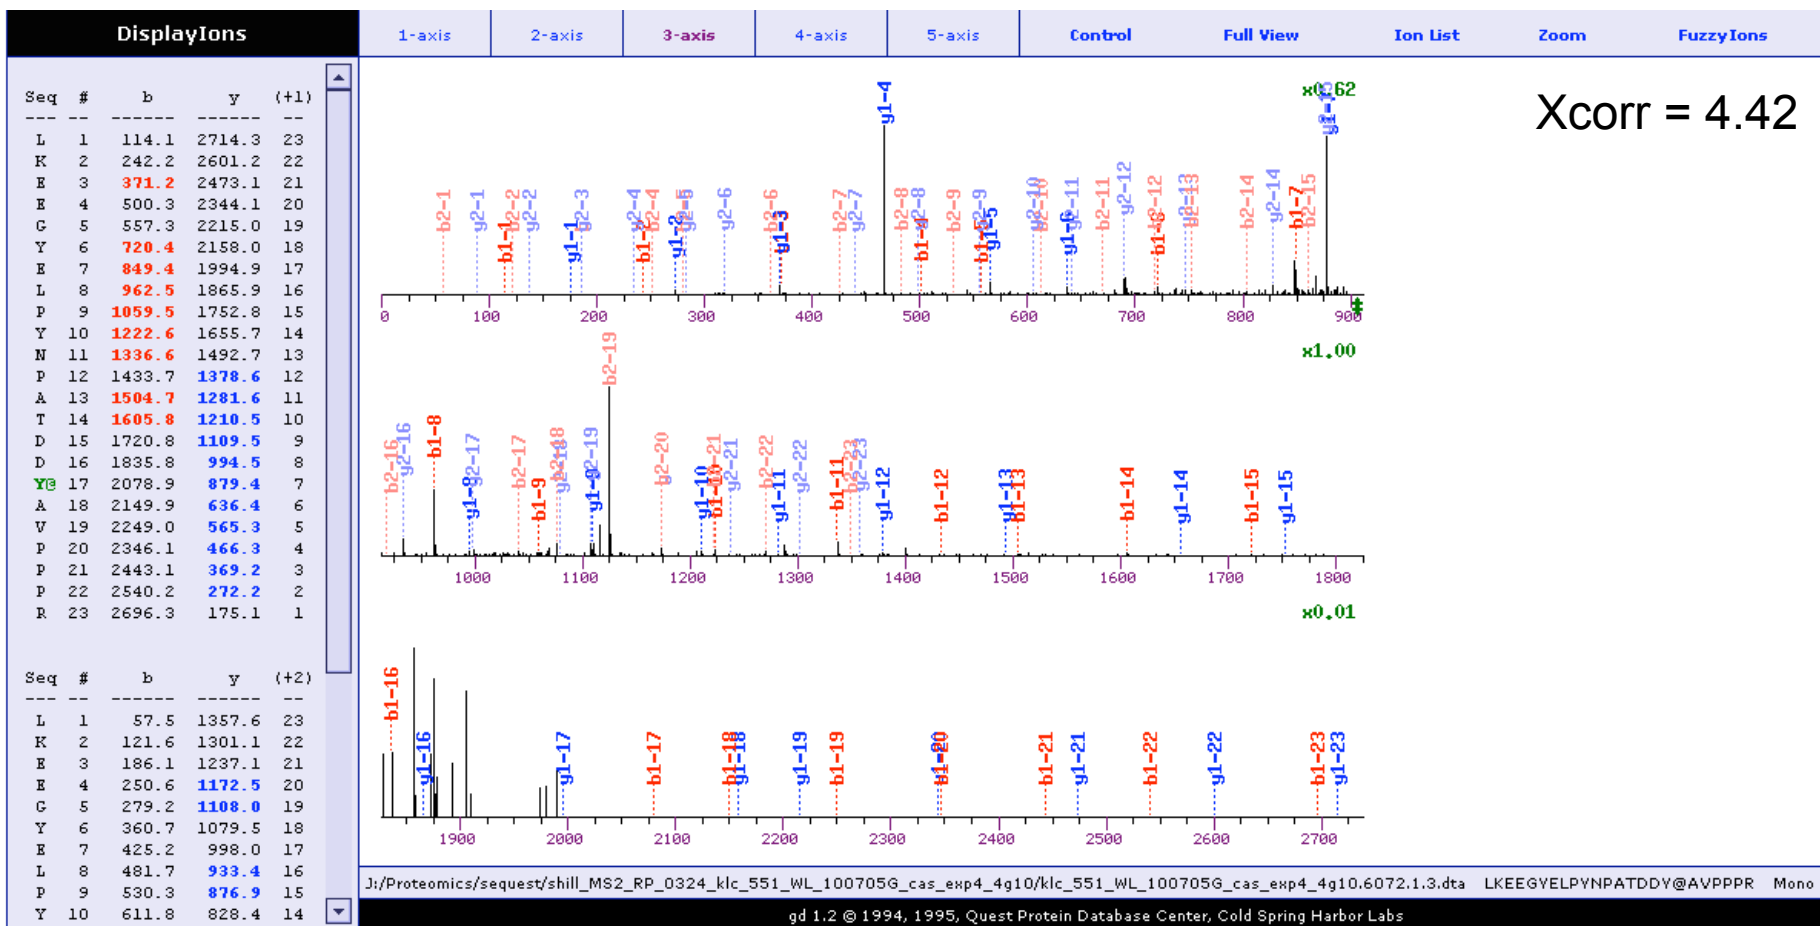

# Dok1 pY408 R.LKEEGYELPY@NPATDDY@AVPPRS@PK.P

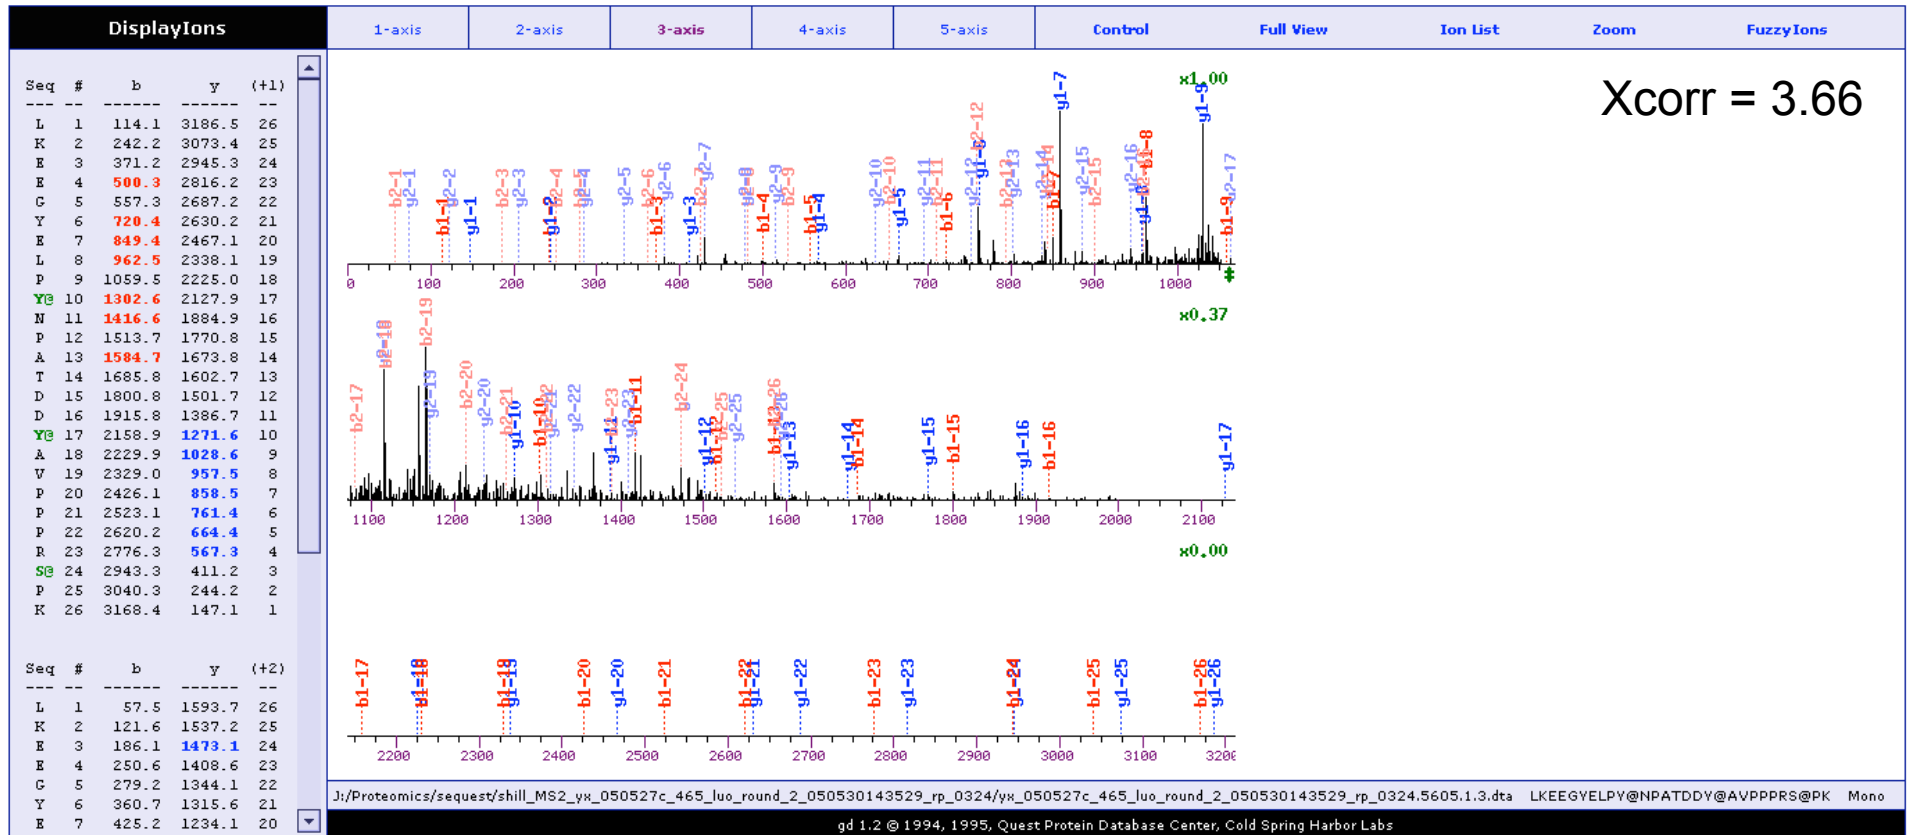

Dok1 pY408

R.LKEEGYELPY@NPATDDY@AVPPPR.S

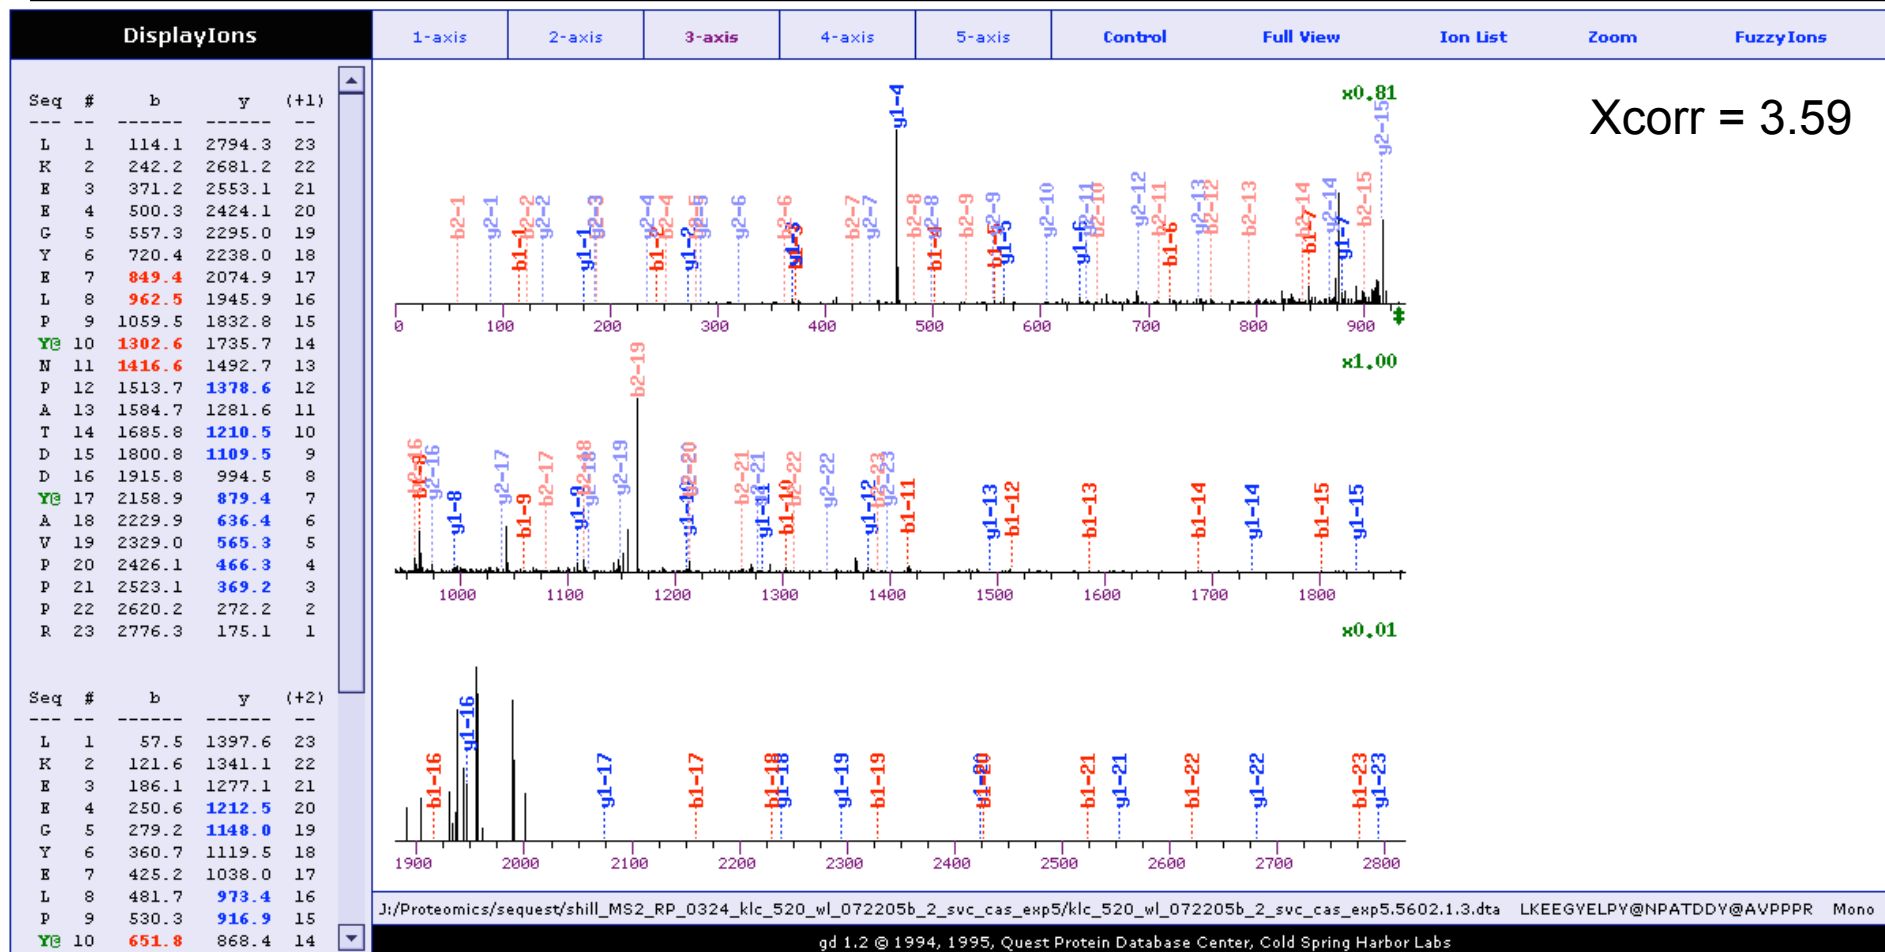



NCK1 pY105

R.KPSVPDTASPADDSFVDPGERLY@DLNMPAFVK.F

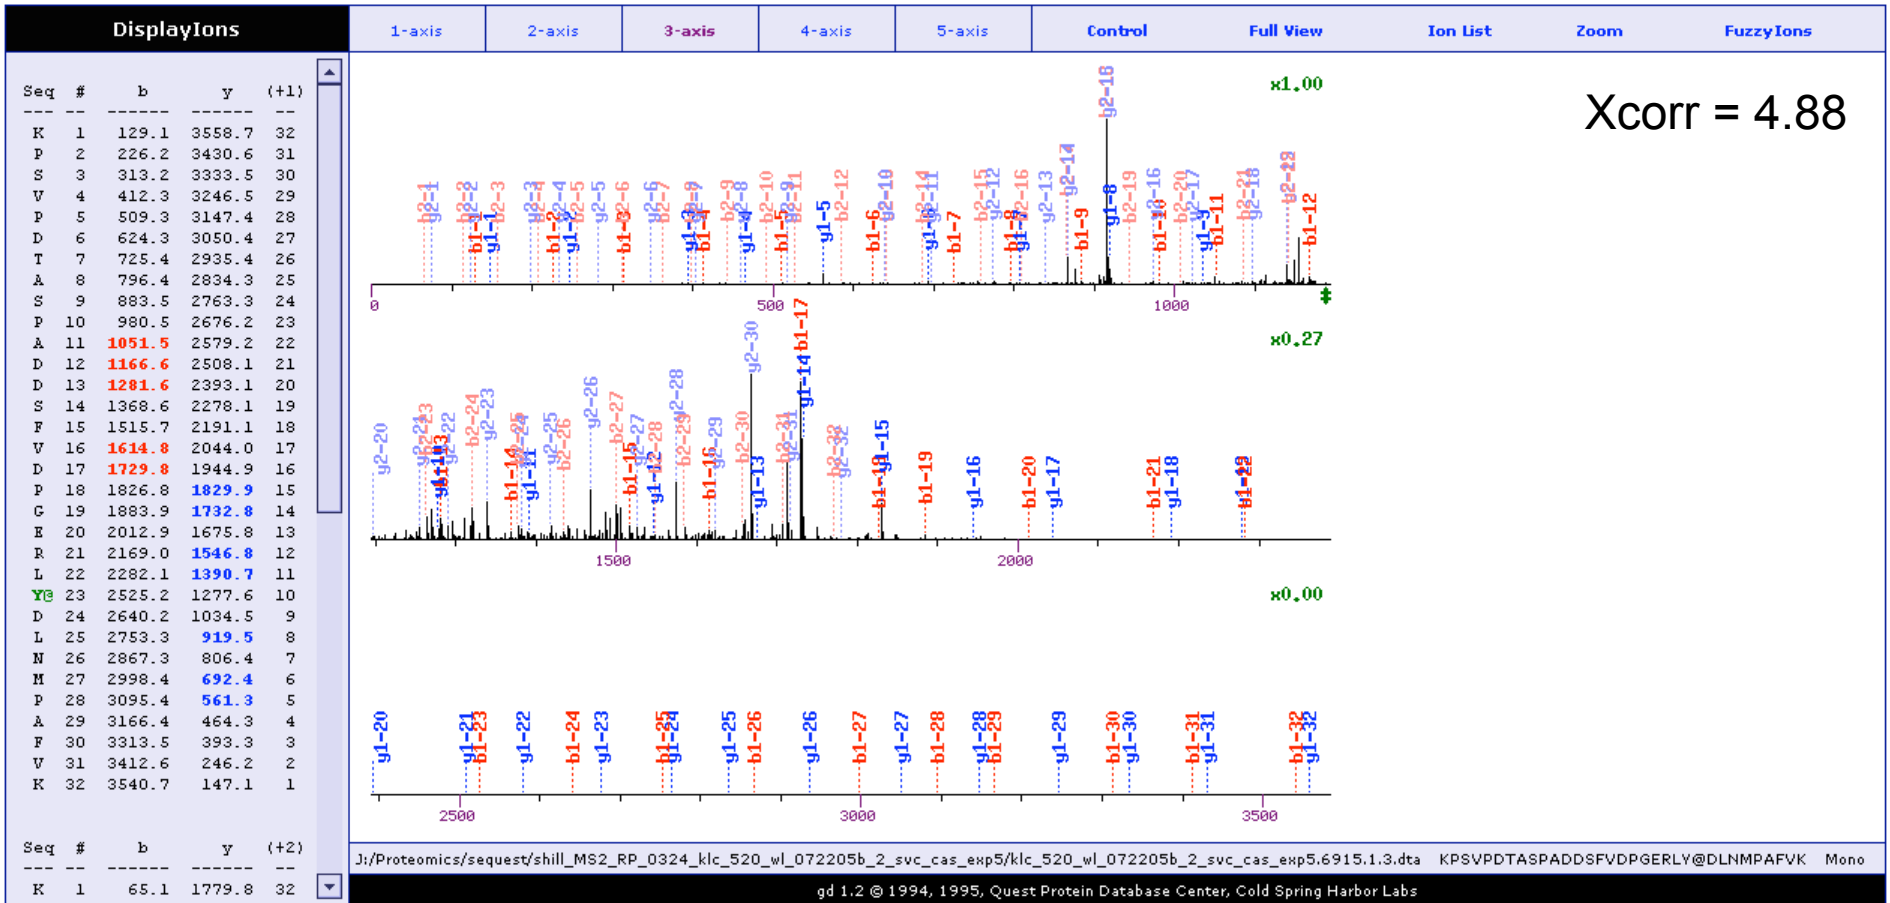

Xcorr = 4.88

NCK1 pY105

K.RKPSVPDTASPADDSFVDPGERLY@DLNMPAFVK.F

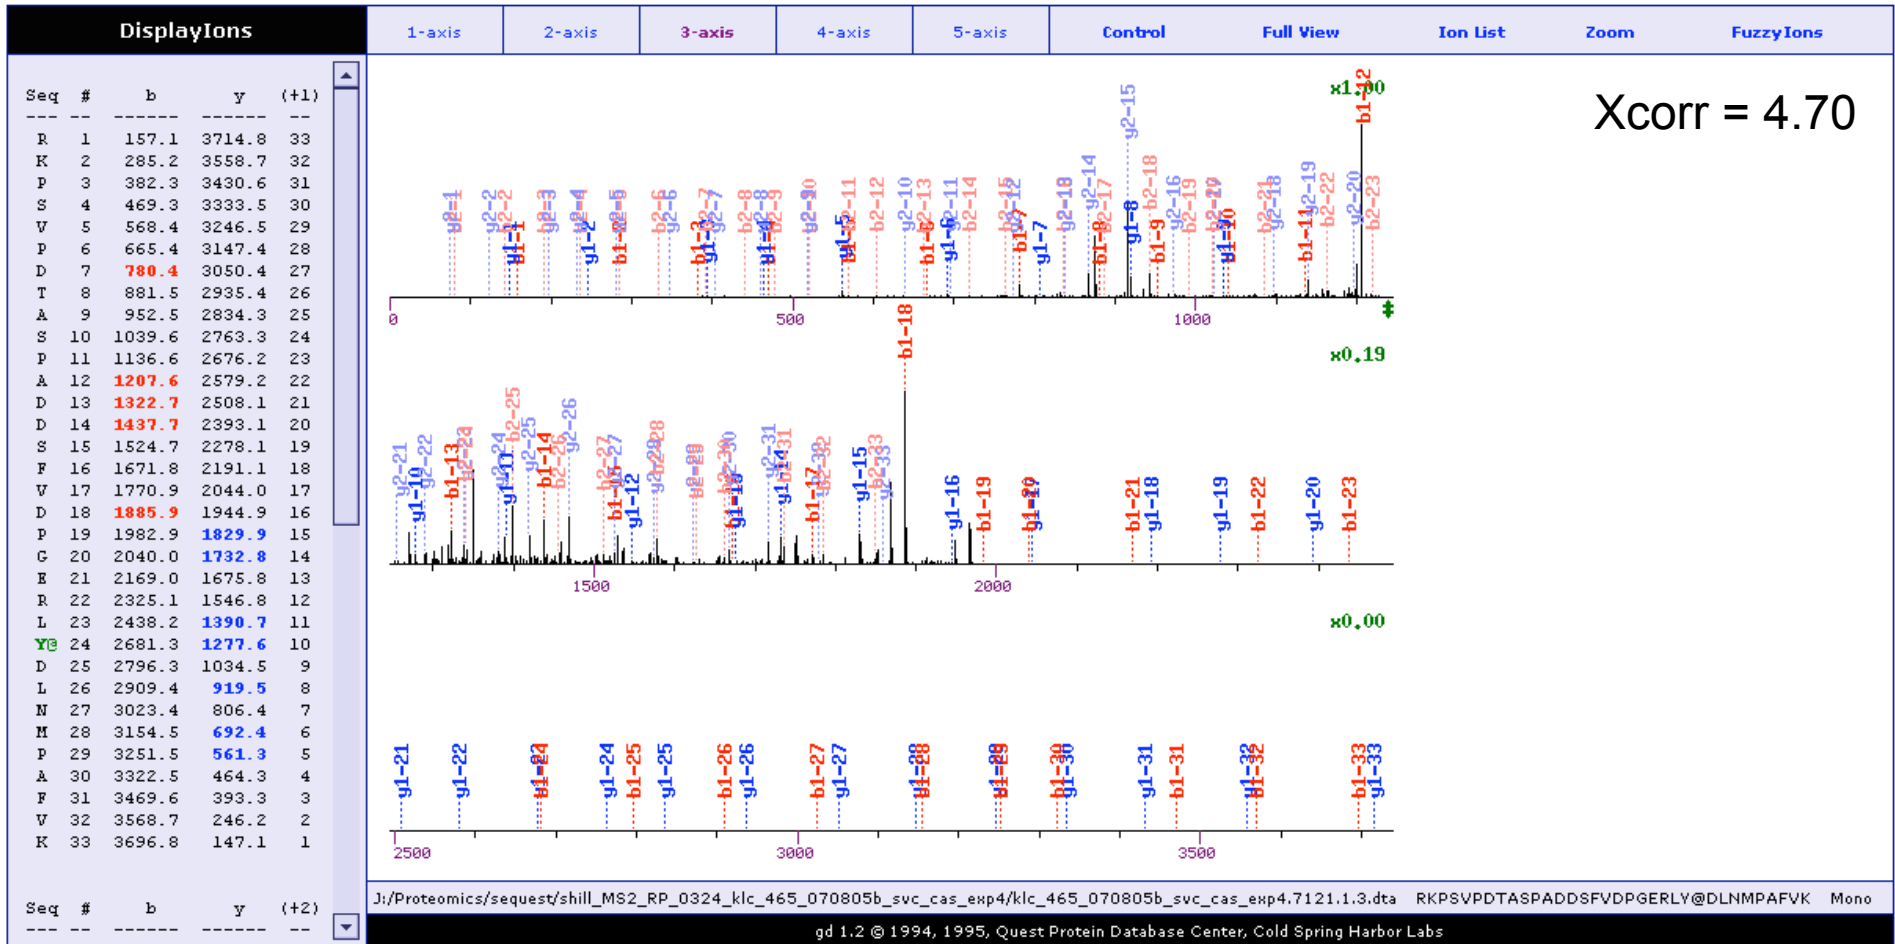

Xcorr = 4.70

NCK1 pY105

K.RKPS@VPDTASPADDSFVDPGERLY@DLNMPAFVK.F

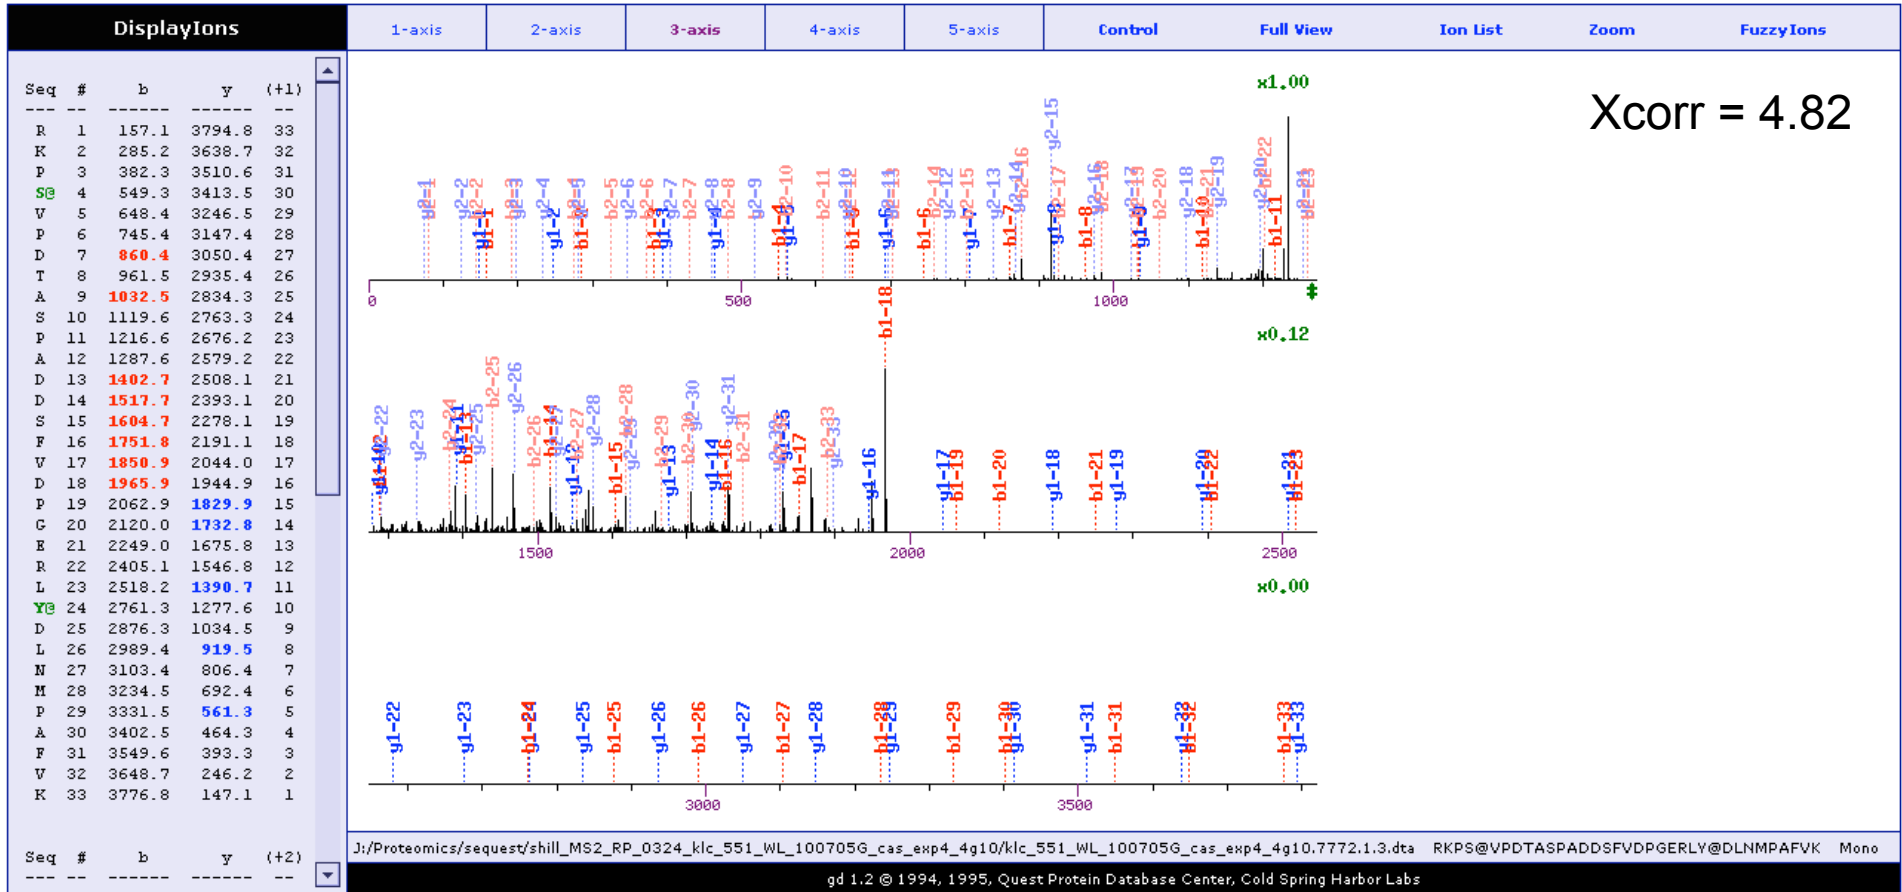

NCK1 pY105

K.PSVPDTASPADDSFVDPGERLY@DLNMPAFVK.F

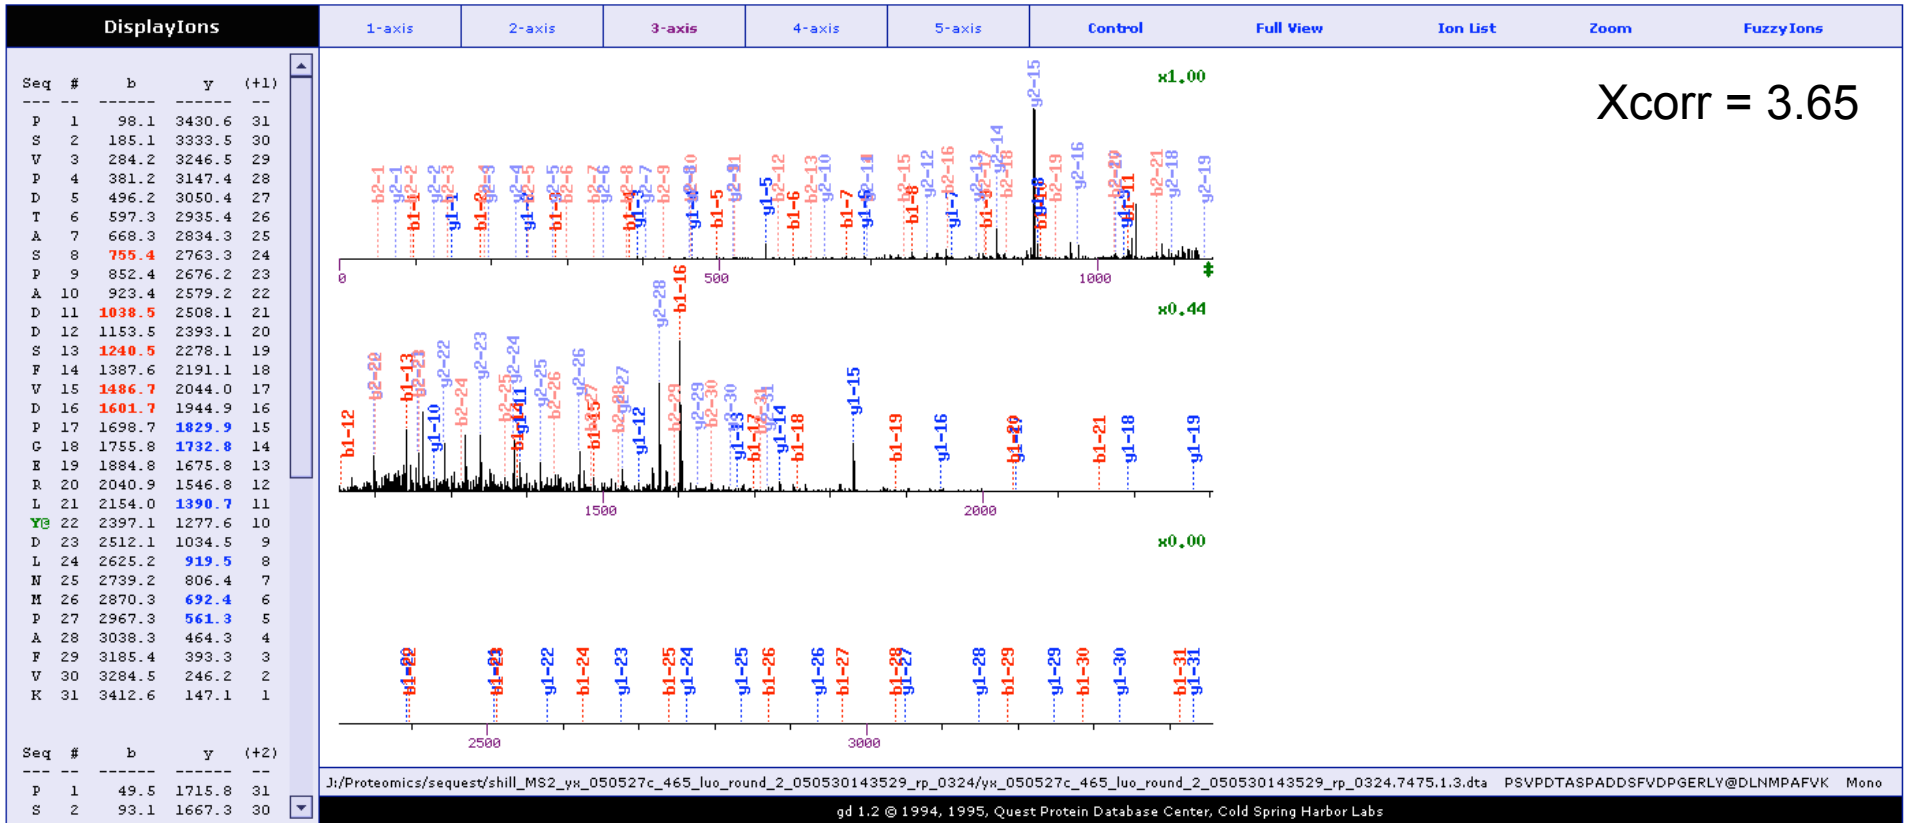

SHC1 pY423

R.KQMLPPRCPGRELFDDPSY@VNIQNLDK.A

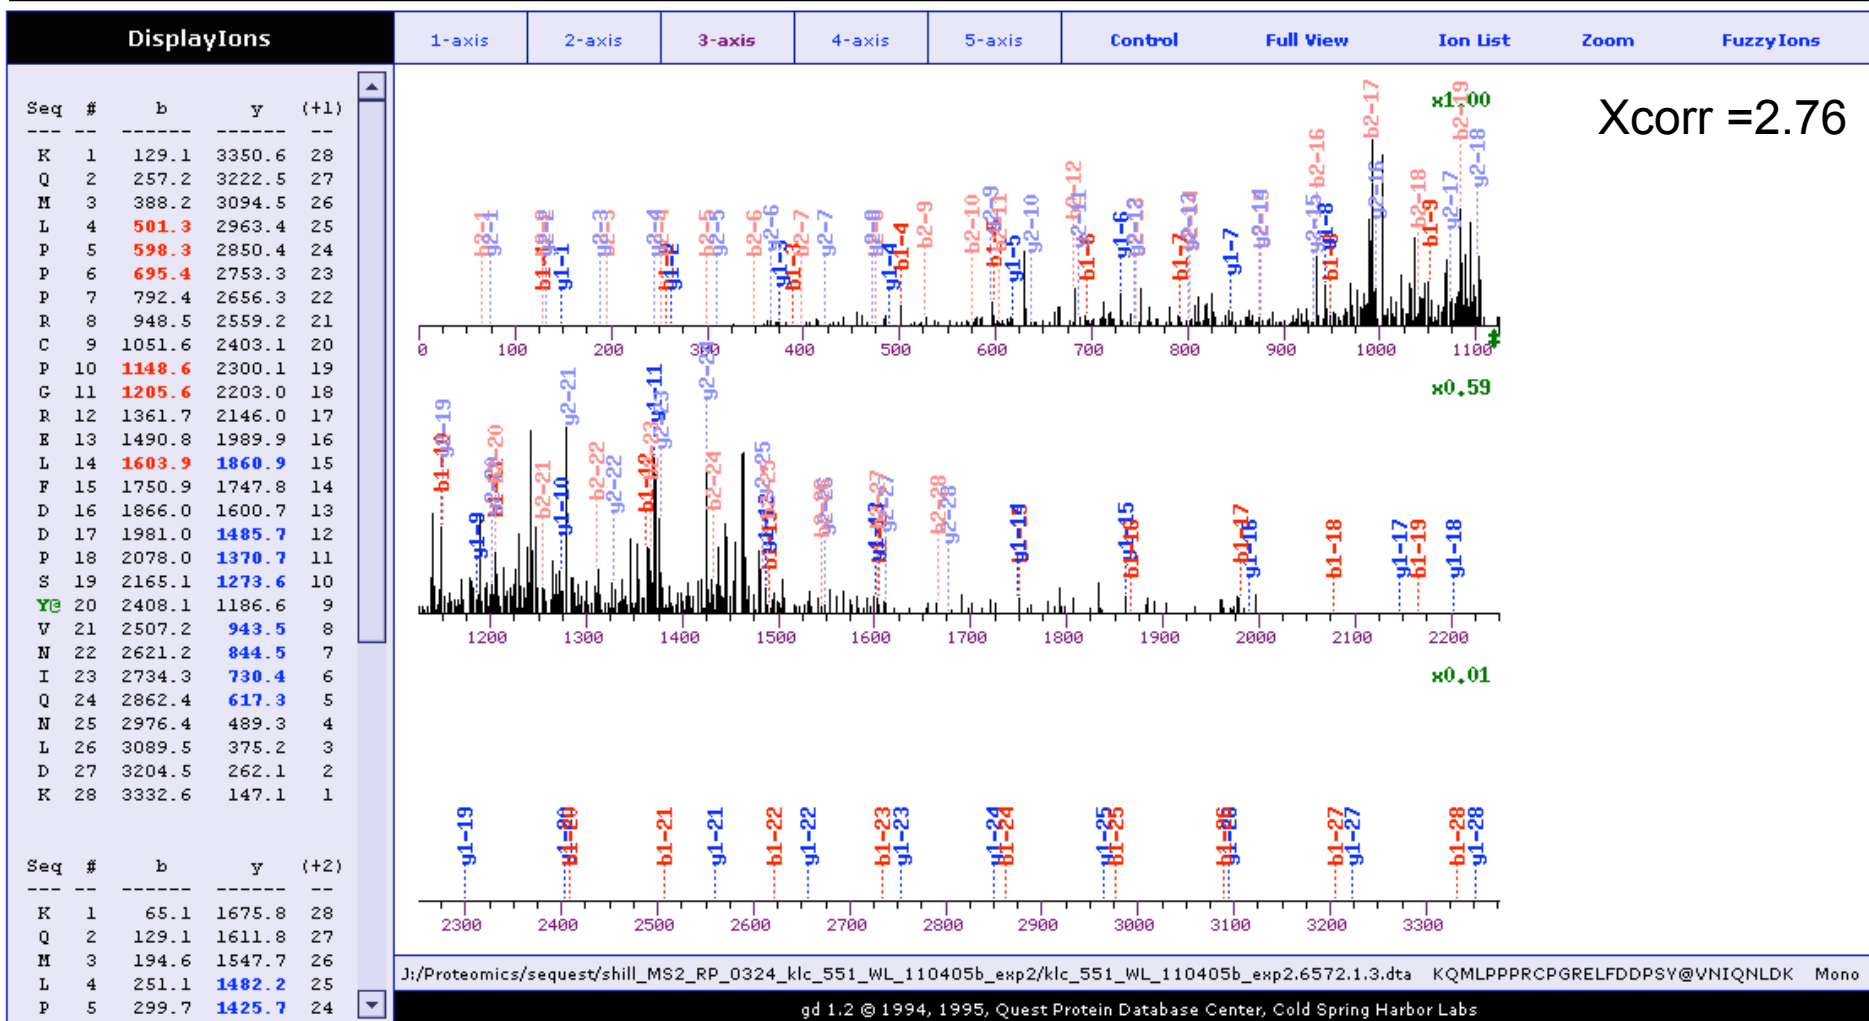

# SHC1 pY423 R.ELFDDPSY@VNIQNLDK.A

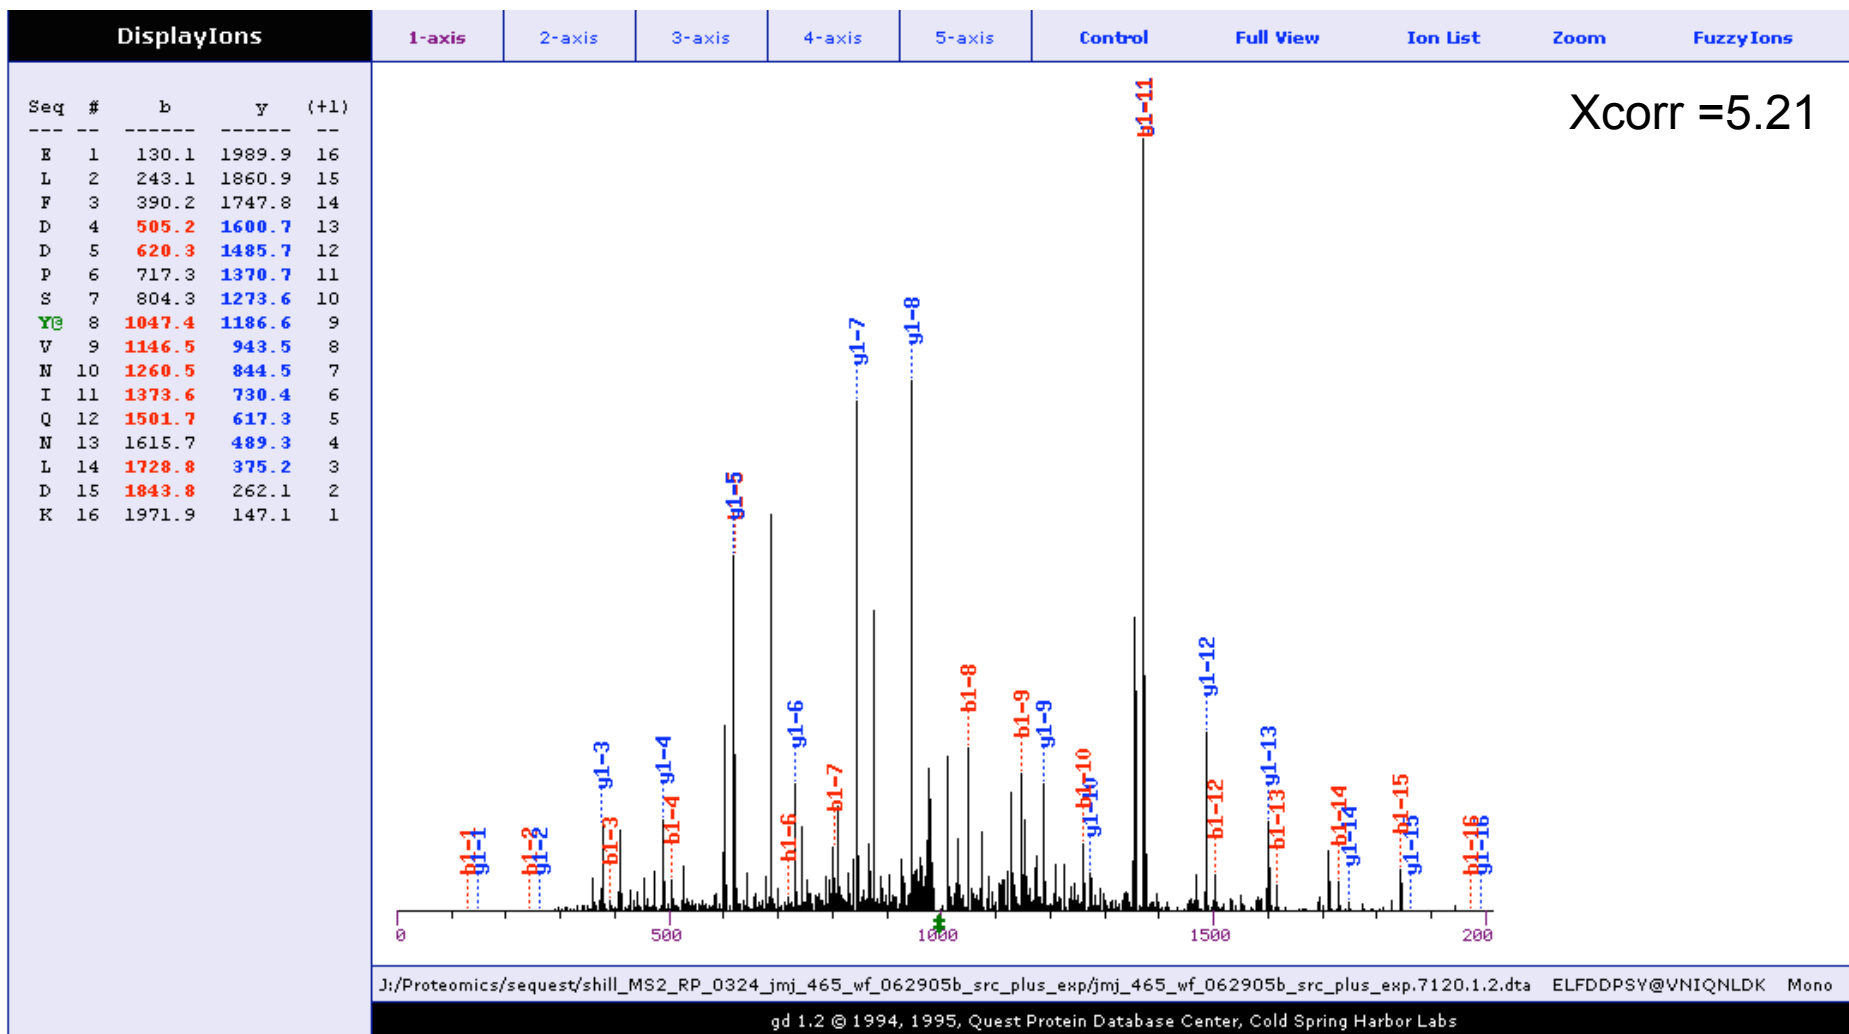

SHC1 pY423

K.QMLPPPRCPGRELFDPSY@VNIQNLDK.A

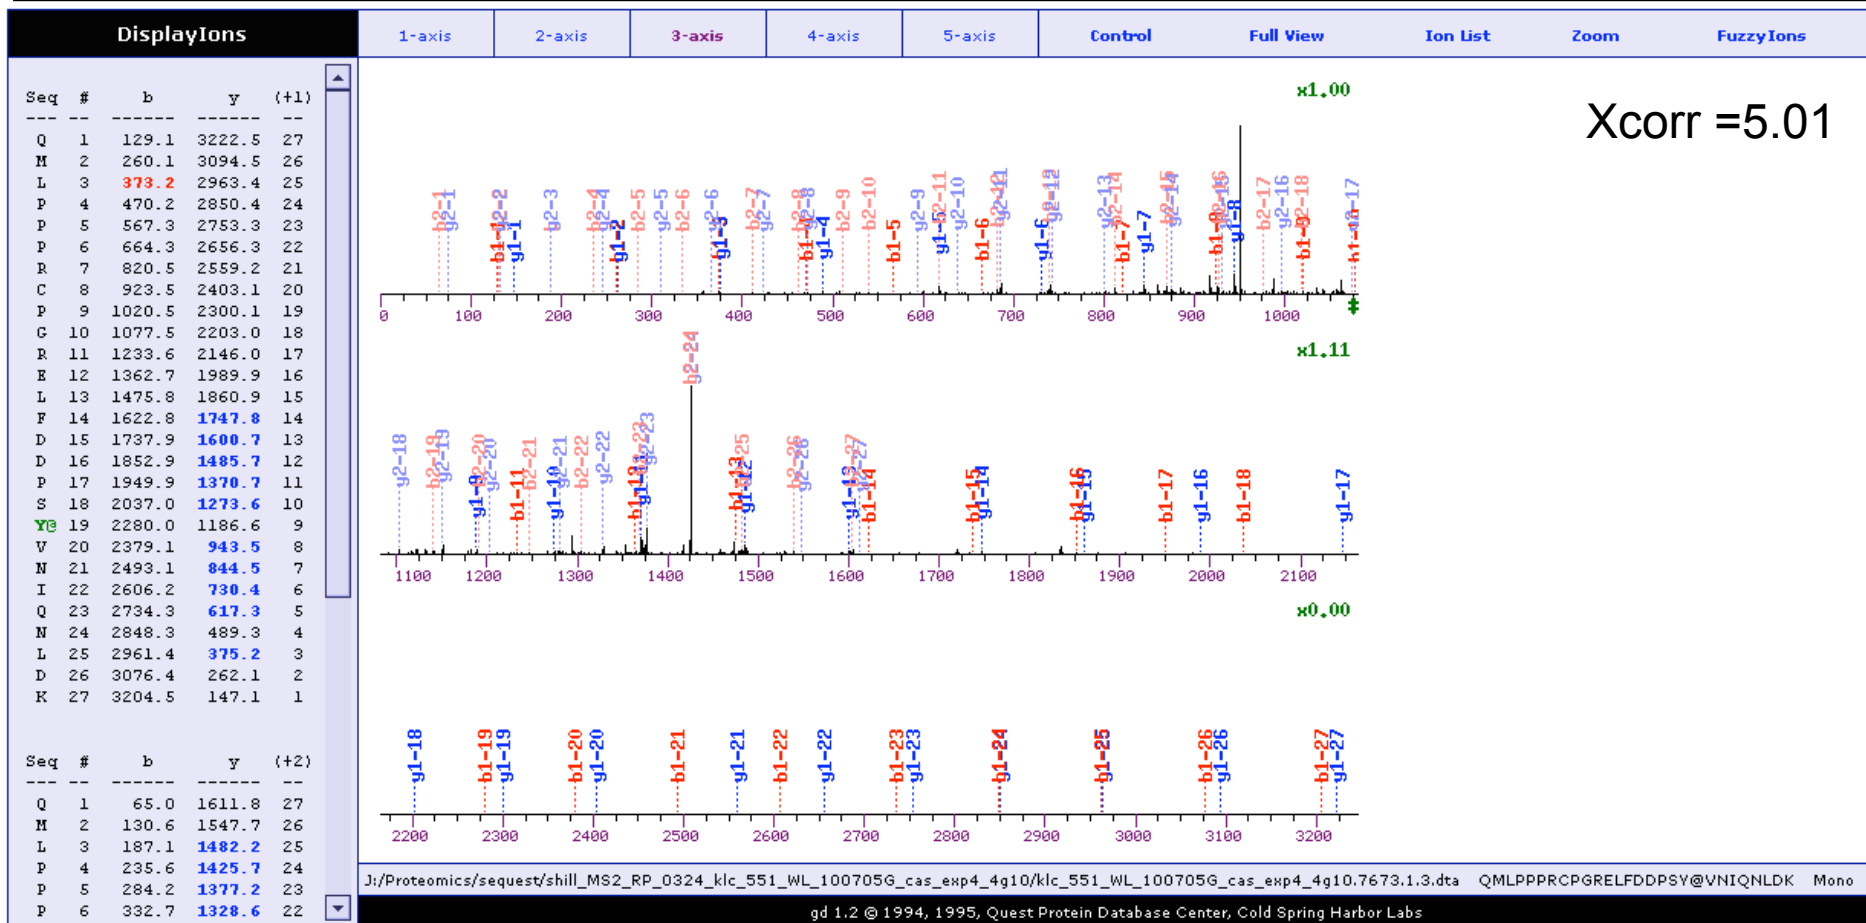

SHC1 pY423

K.QM#LPPPPC\*PGRELFDDPSY@VNIQNLDK.A

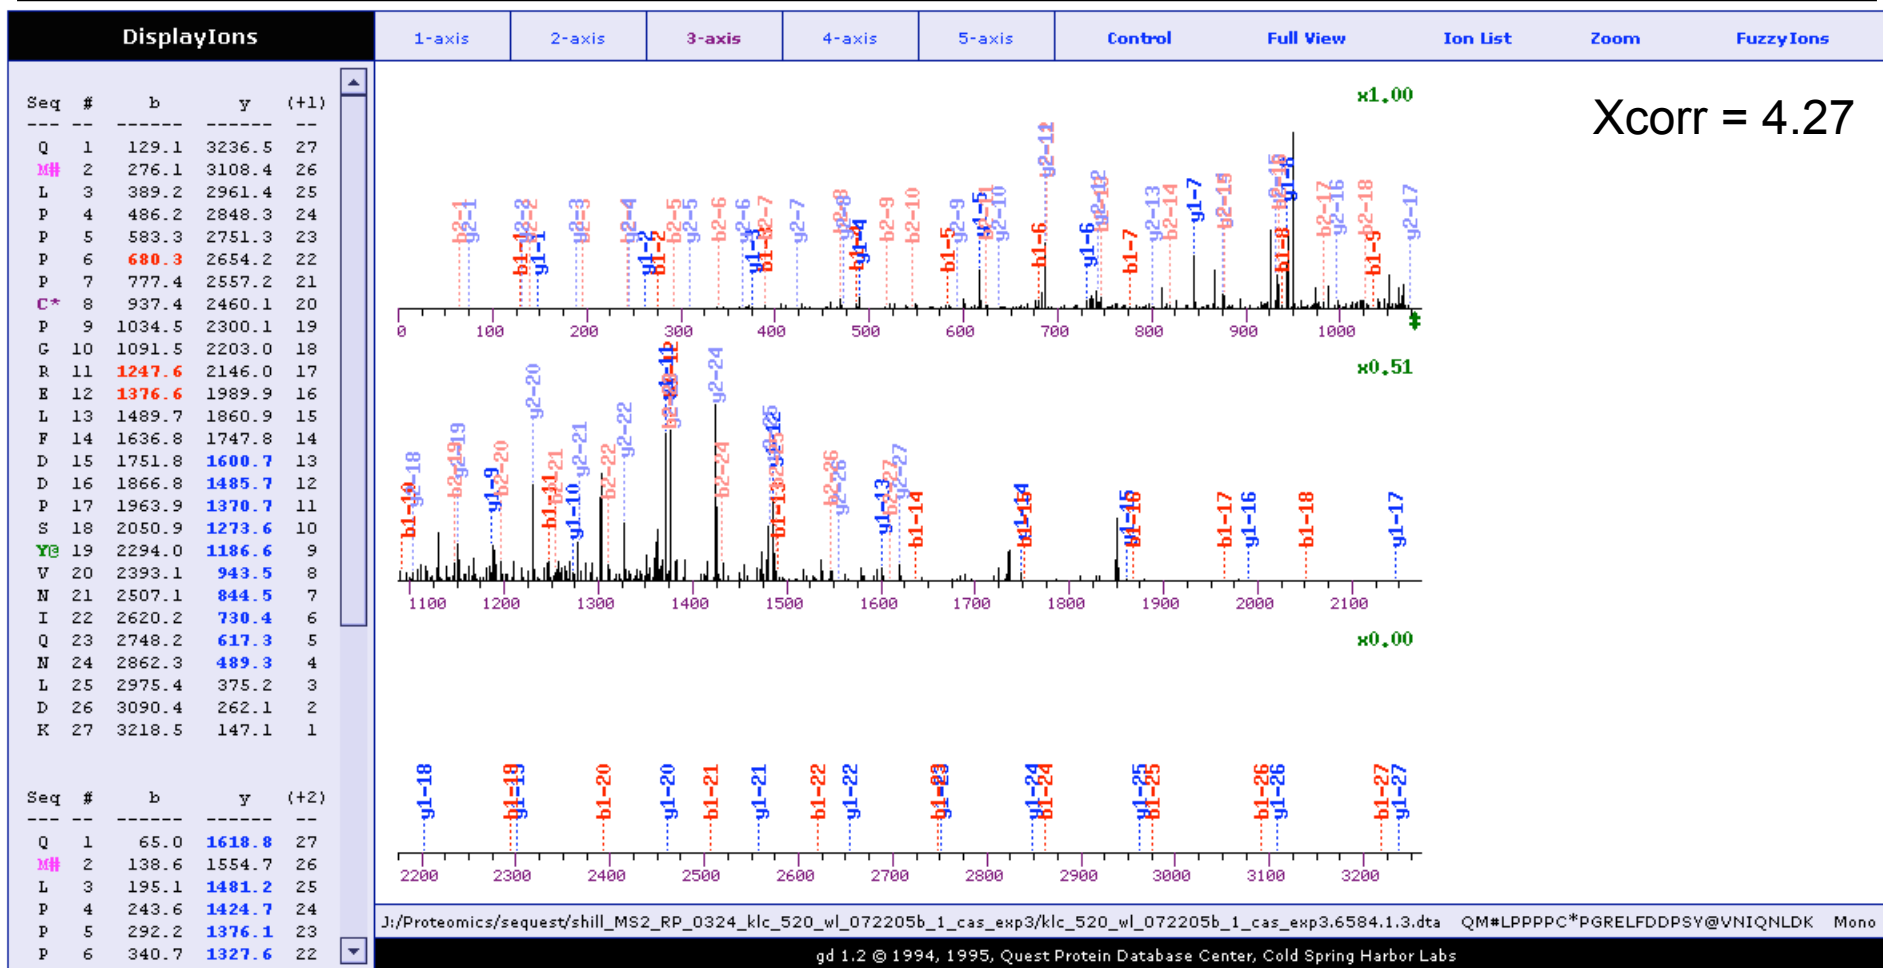



p130cas pY253 R.HLLAPGPQDIY@DVPPVR.G

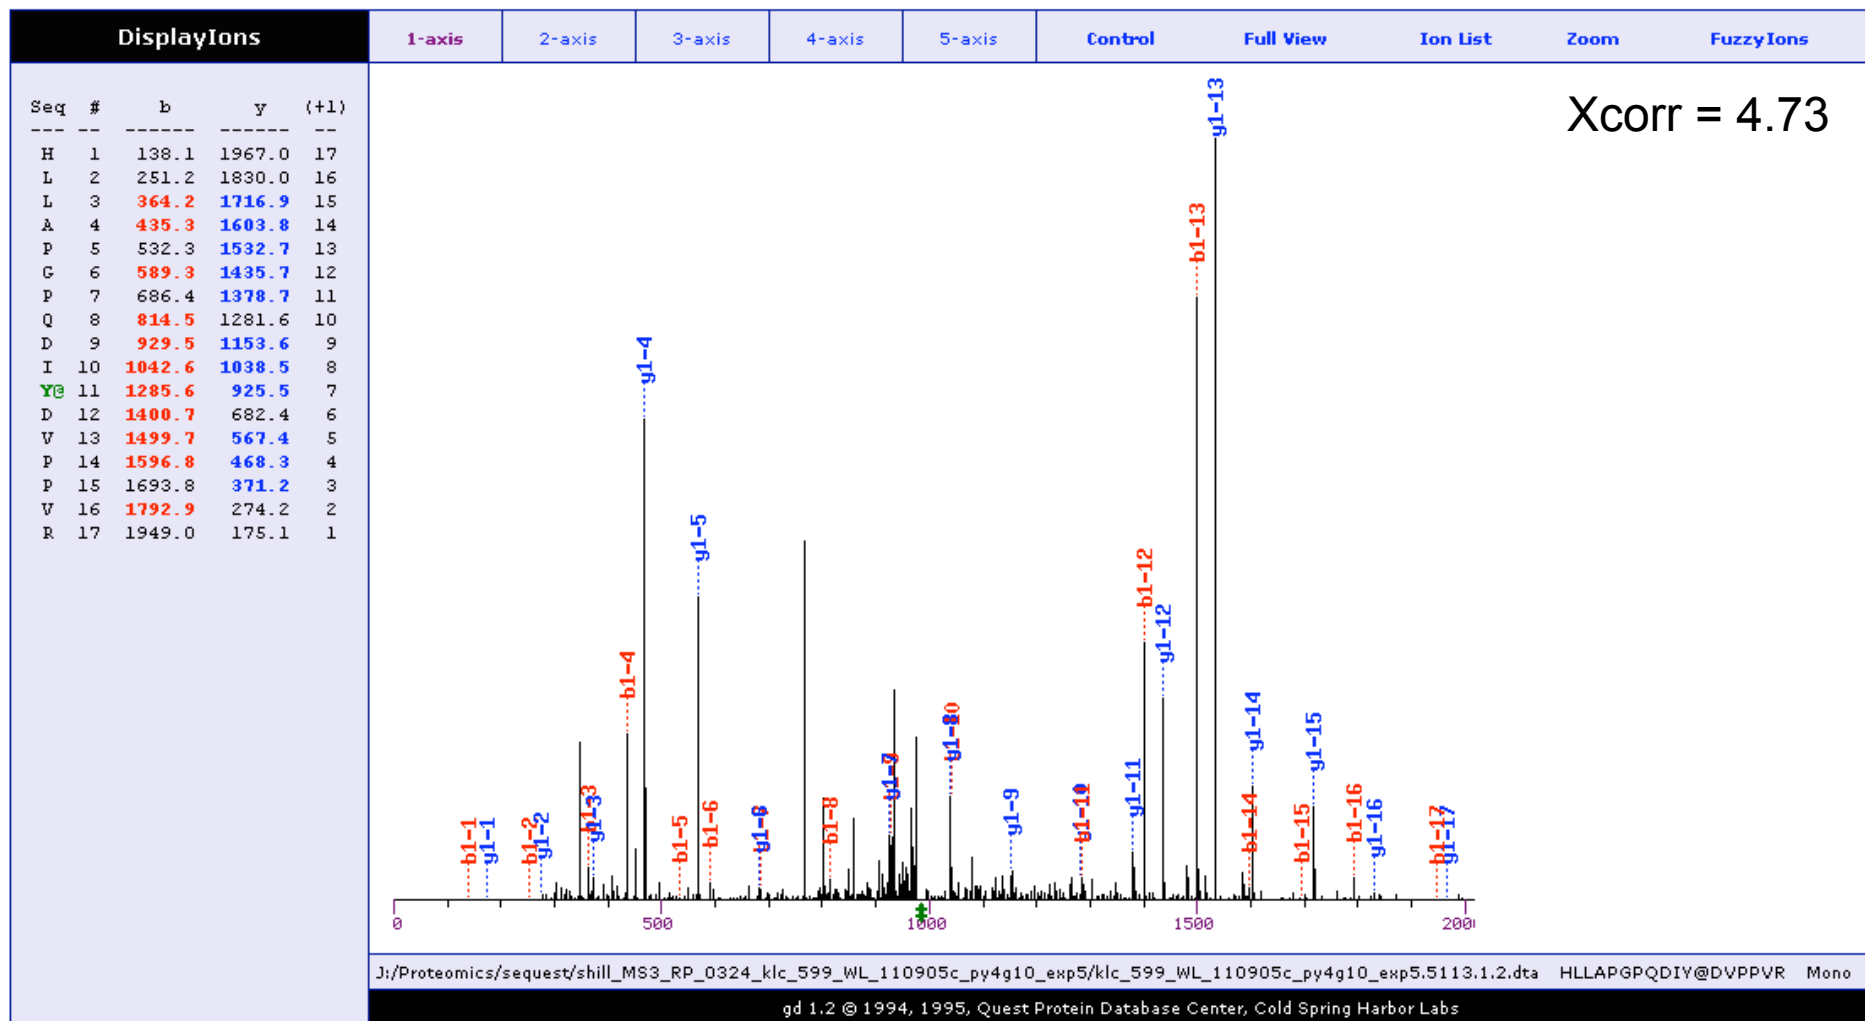

p130cas pY253

R.HLLAPGPQDIY@DVPPVR.G

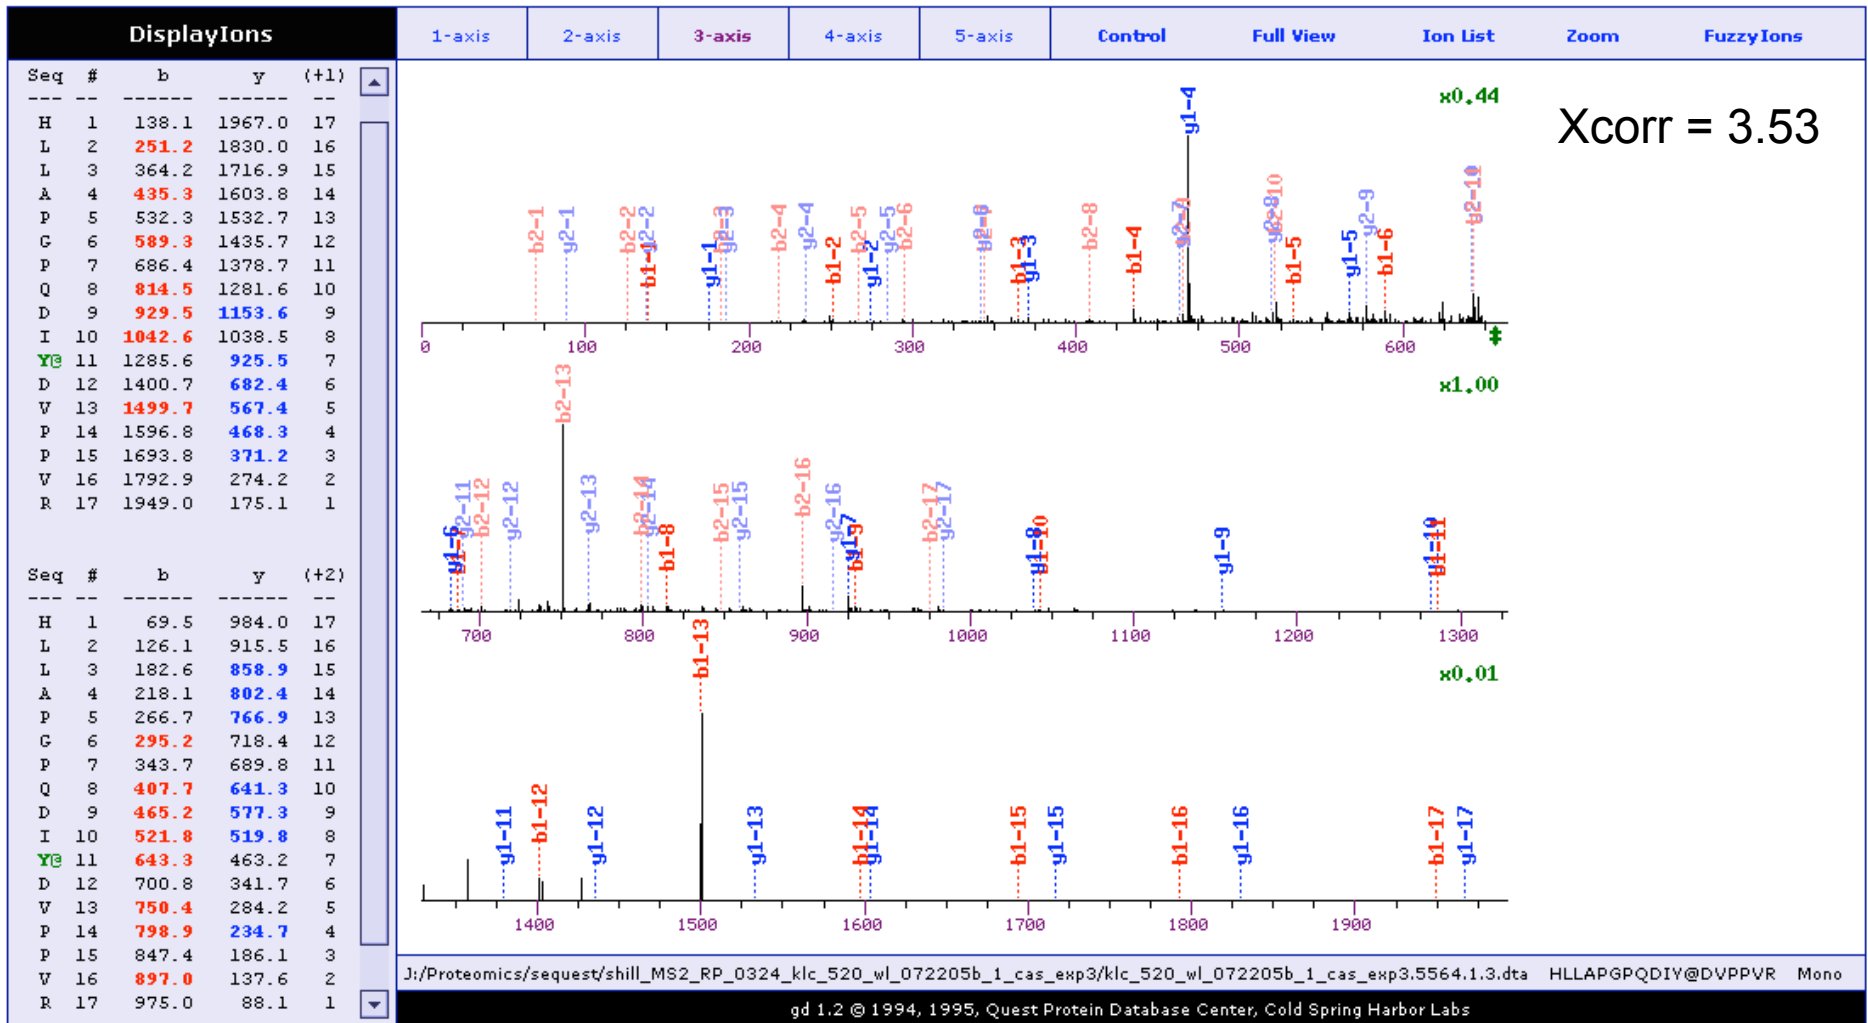

p130cas pY271 R.GLLPNQYGQEVY@DTPPMVK.G

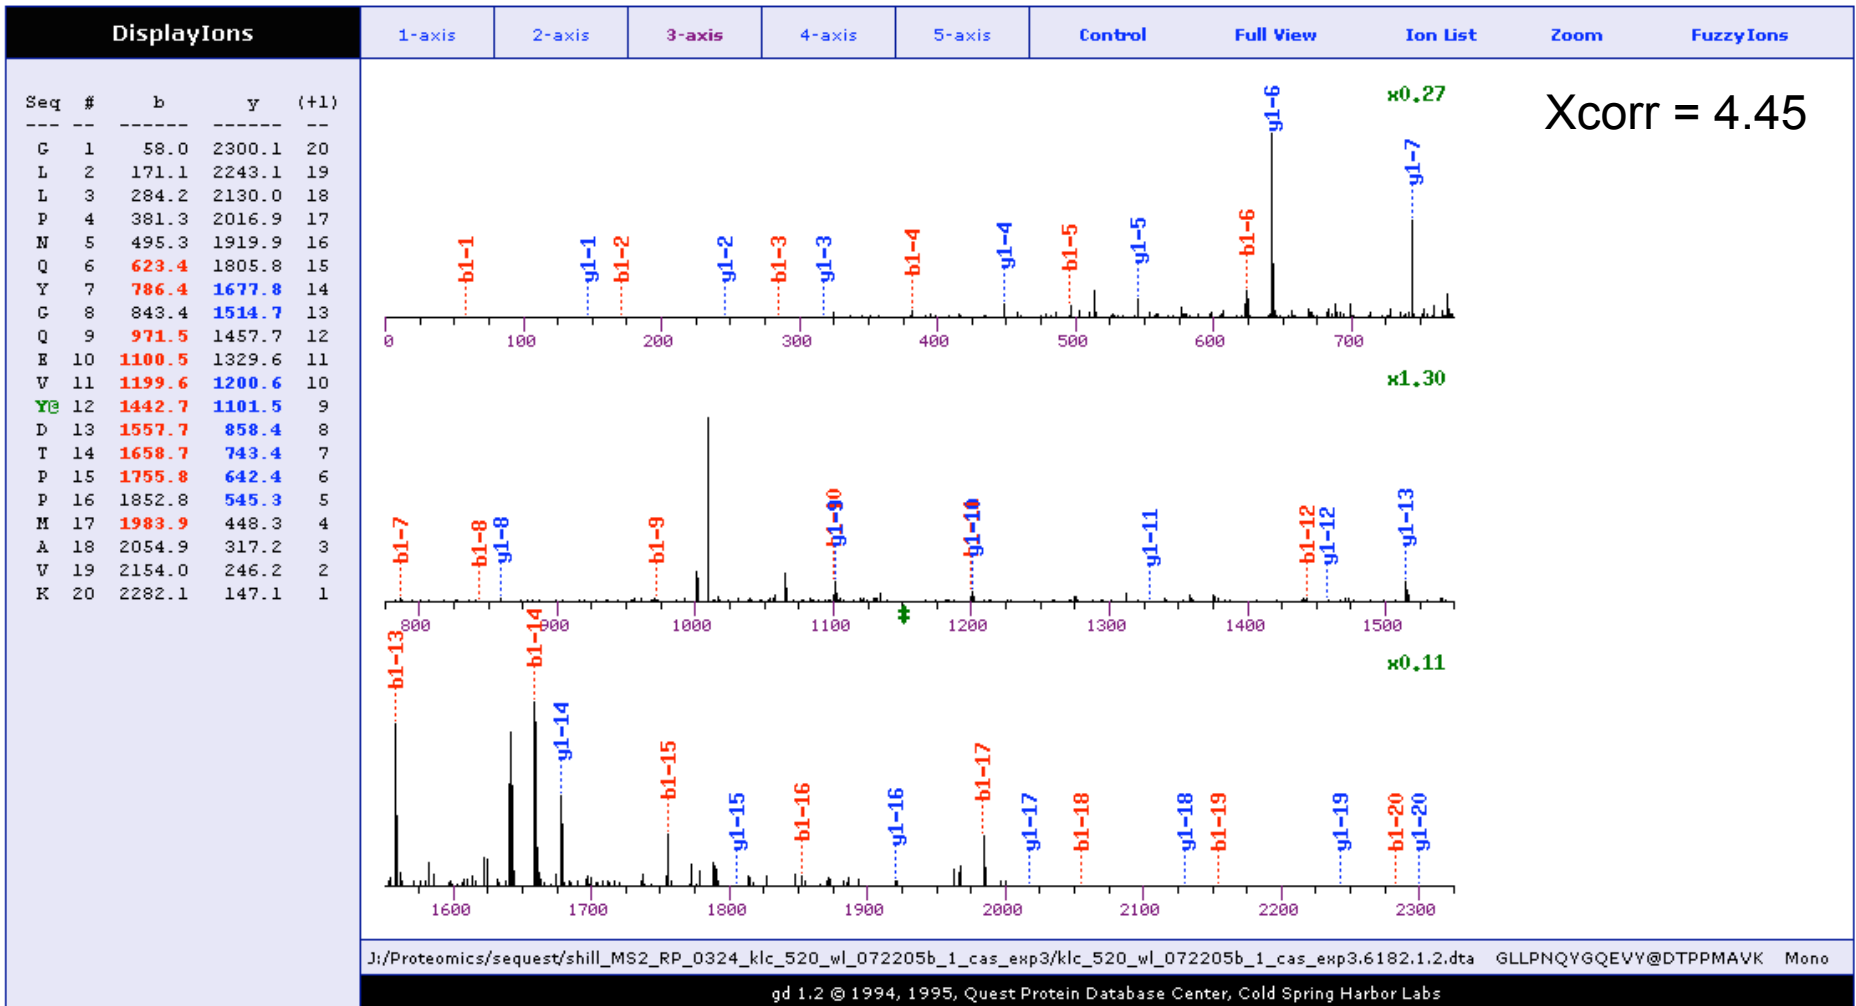

p130cas pY271 R.GLLPNQYGQEVY@DTPPMVK.G

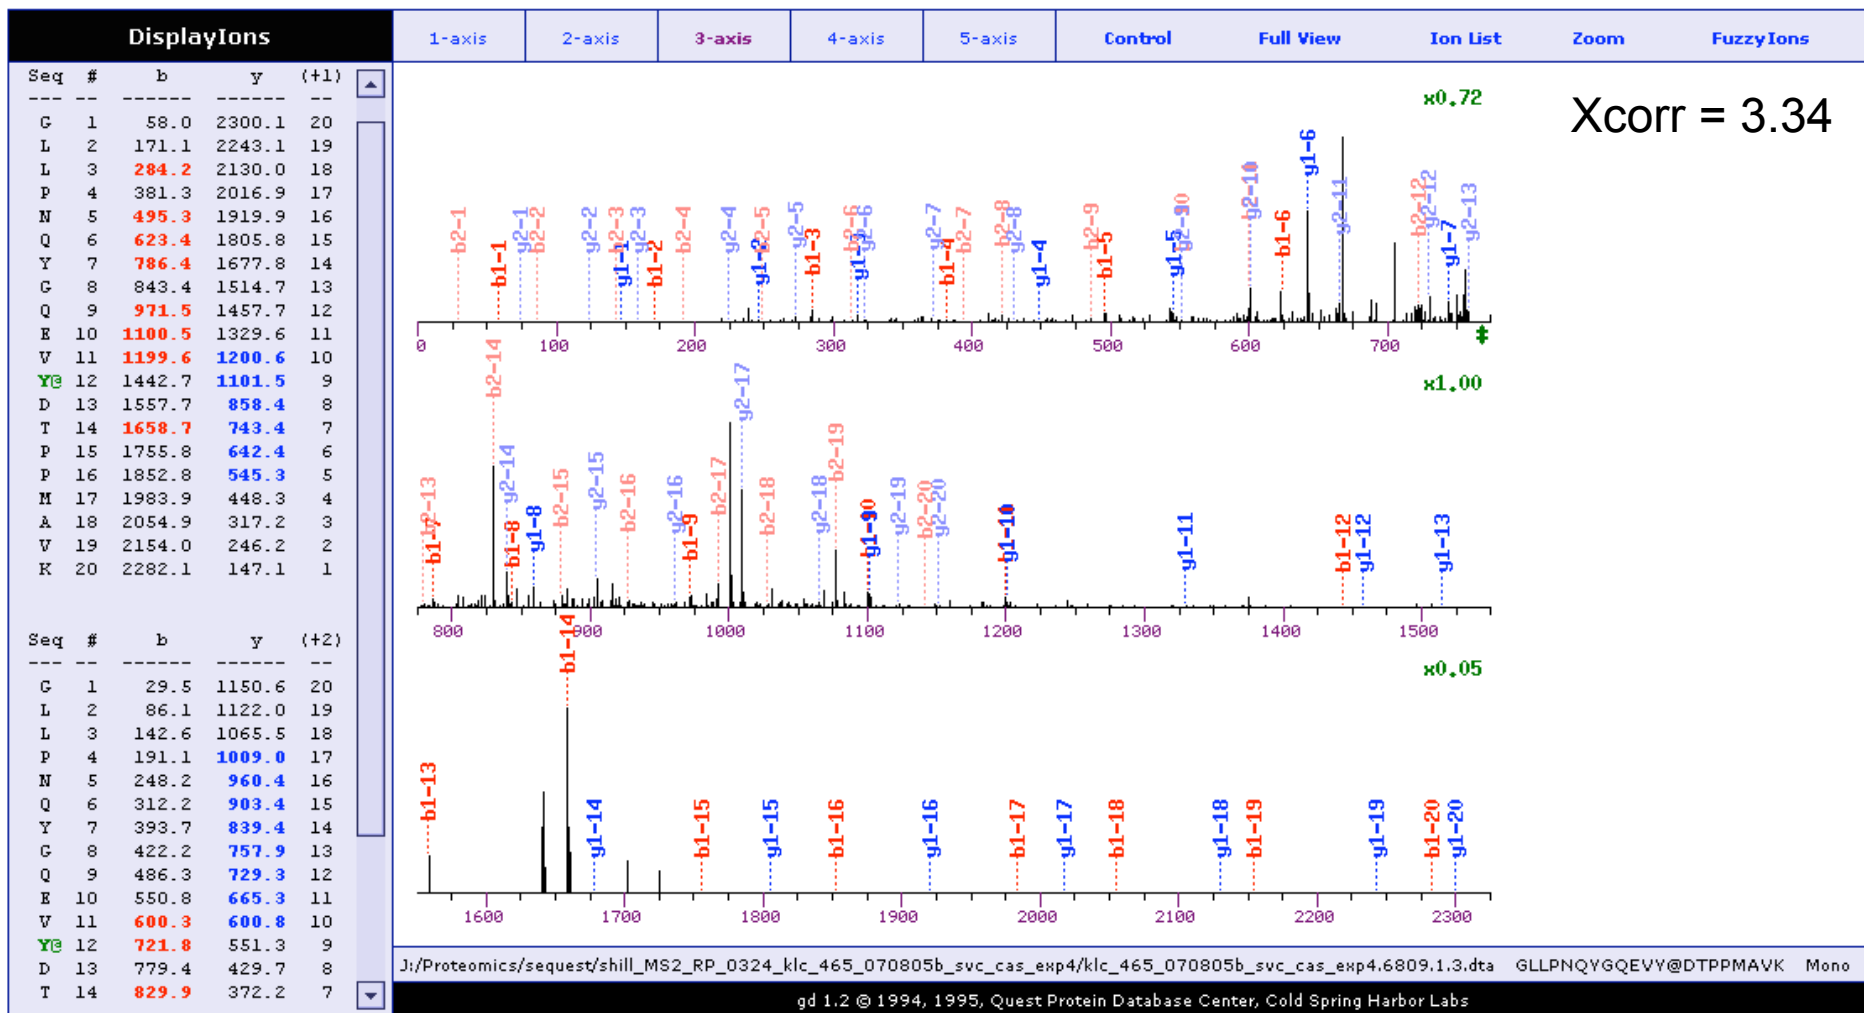

p130cas pY414 R.VLPPEVADGSVDDGVY@AVPPPAER.E

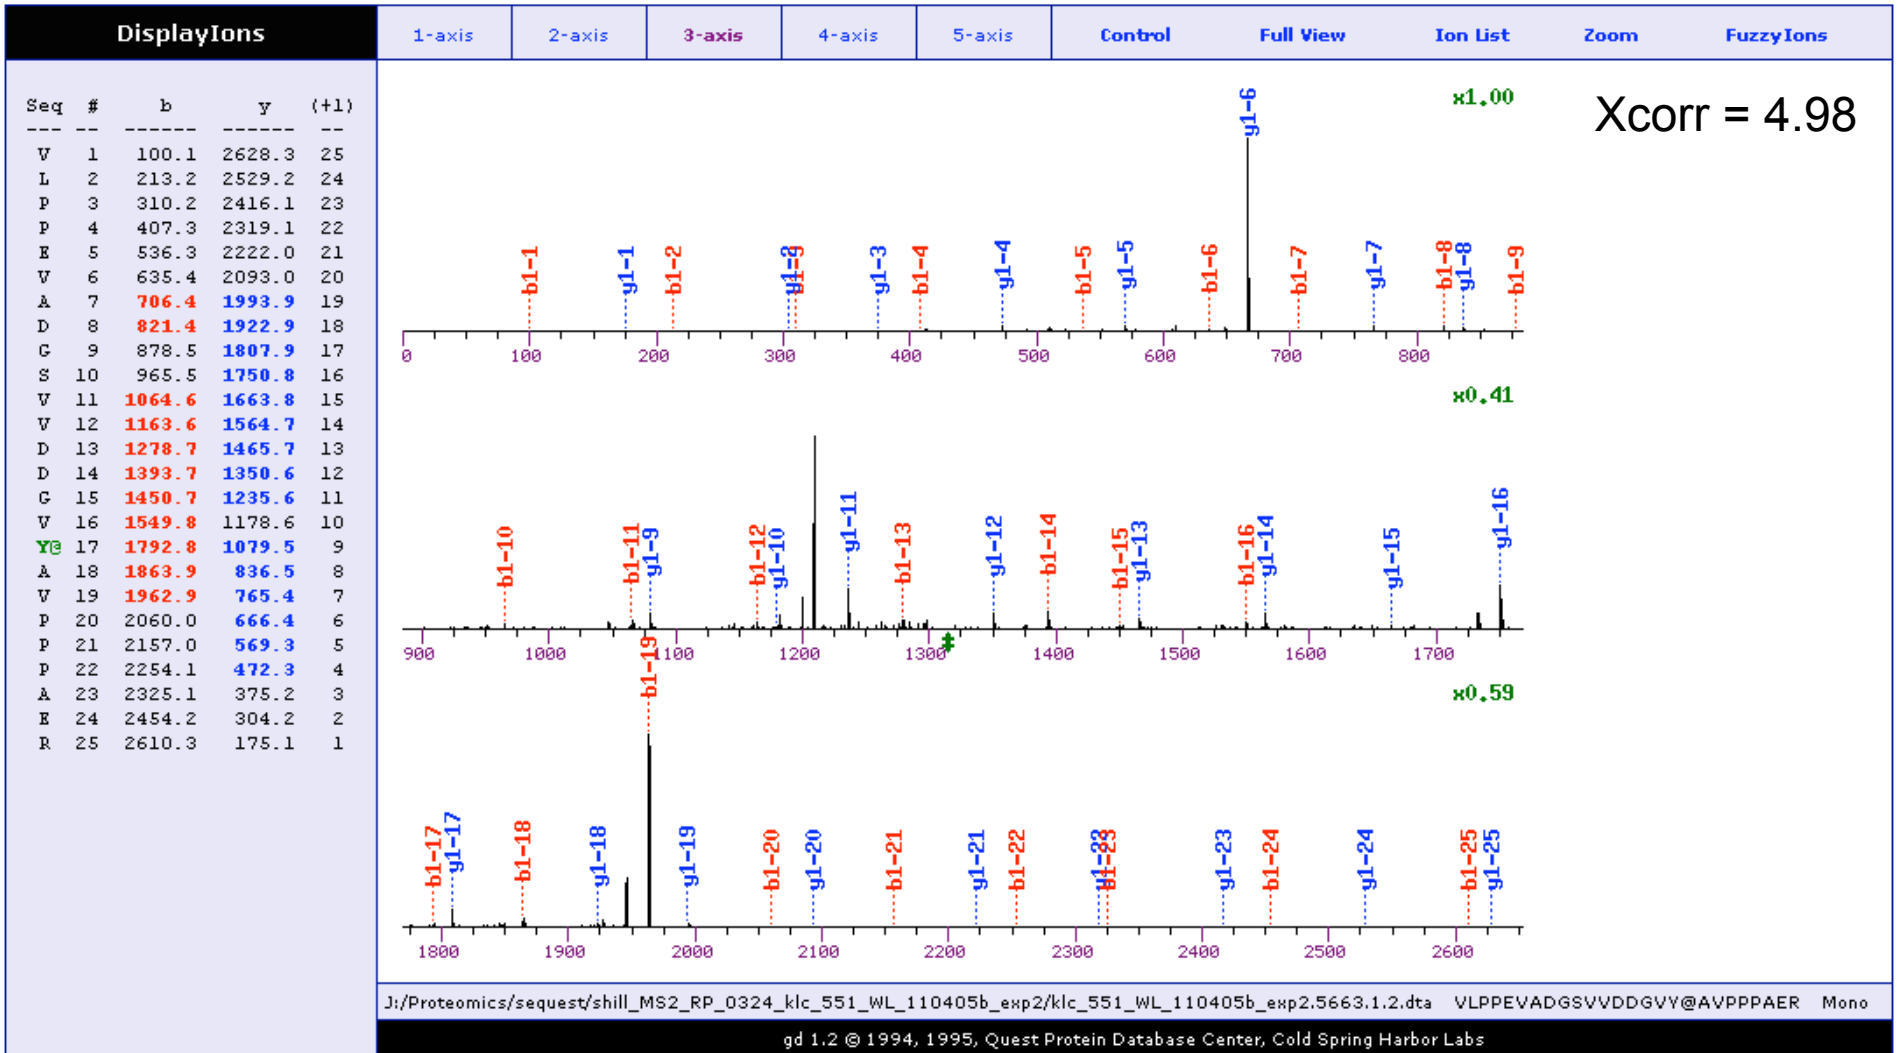

LPP pY245

Y.MAGPSSGQIY@GPGPRGY.N

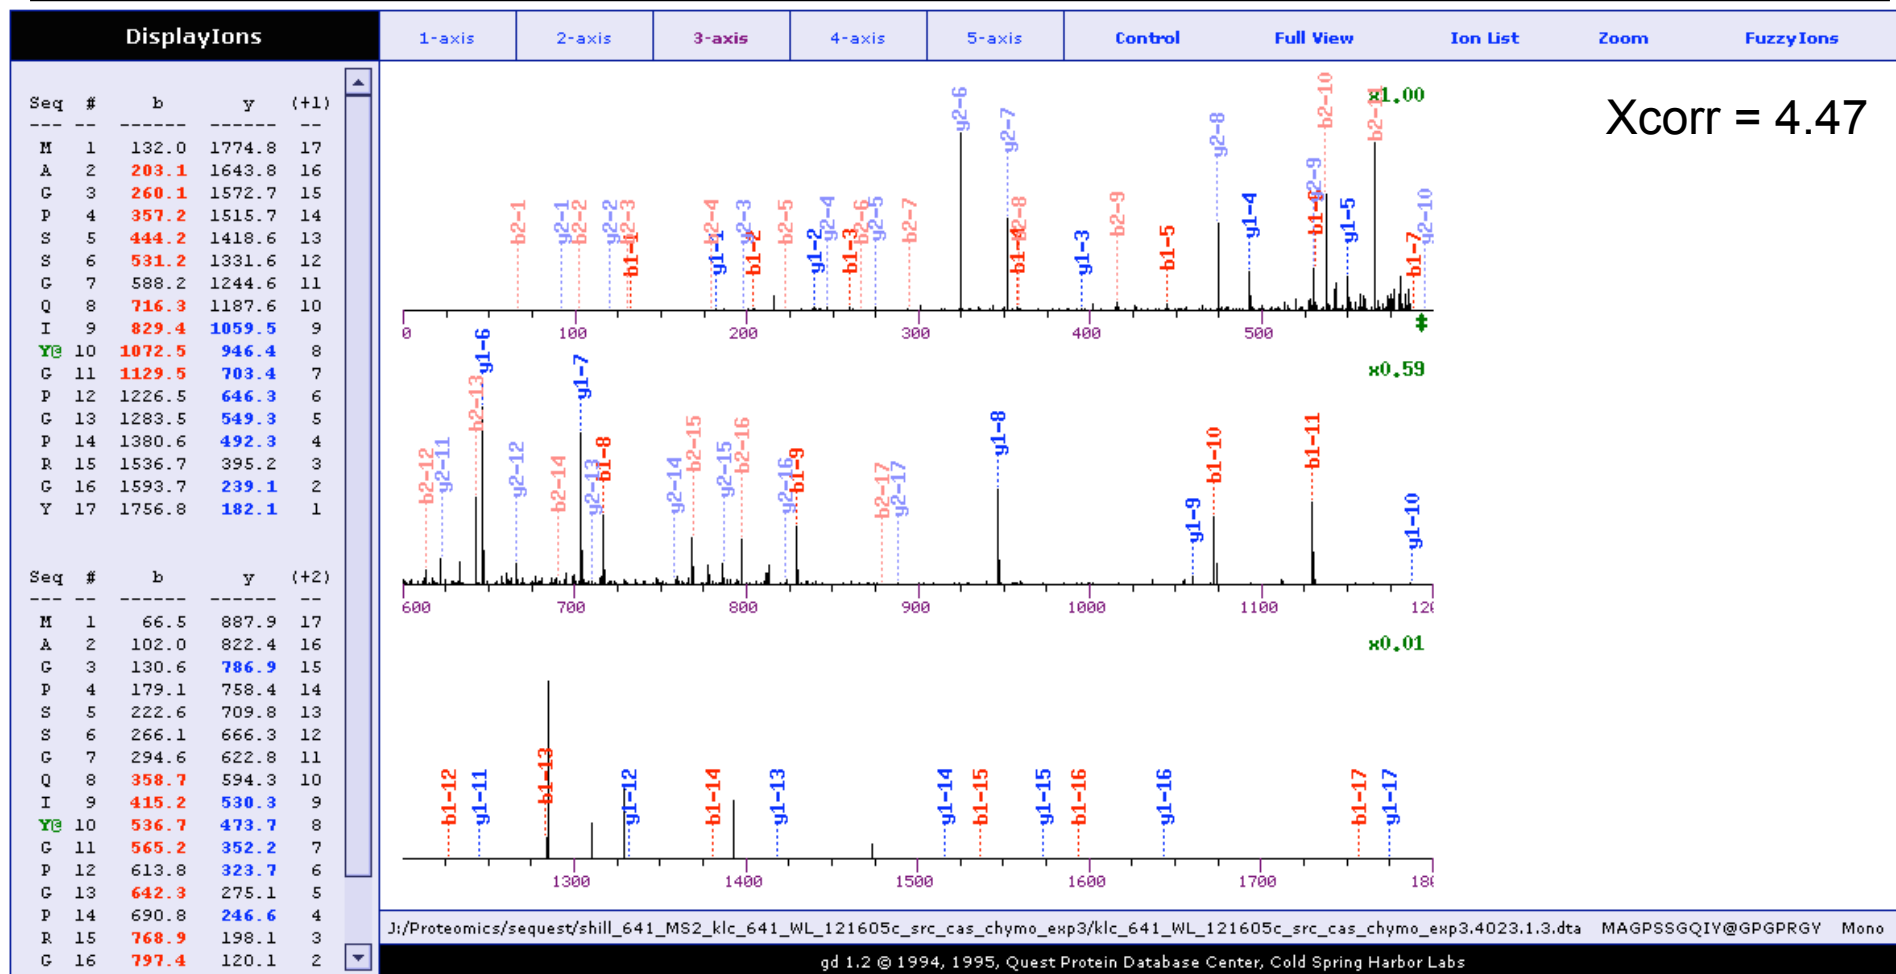

LPP pY245

Y.MAGPSSGQIY@GPGPRGY.N

DisplayIons

| Seq # | b      | y (+1)    |
|-------|--------|-----------|
| M 1   | 132.0  | 1774.8 17 |
| A 2   | 203.1  | 1643.8 16 |
| G 3   | 260.1  | 1572.7 15 |
| P 4   | 357.2  | 1515.7 14 |
| S 5   | 444.2  | 1418.6 13 |
| S 6   | 531.2  | 1331.6 12 |
| G 7   | 588.2  | 1244.6 11 |
| Q 8   | 716.3  | 1187.6 10 |
| I 9   | 829.4  | 1059.5 9  |
| Y 10  | 1072.5 | 946.4 8   |
| G 11  | 1129.5 | 703.4 7   |
| P 12  | 1226.5 | 646.3 6   |
| G 13  | 1283.5 | 549.3 5   |
| P 14  | 1380.6 | 492.3 4   |
| R 15  | 1536.7 | 395.2 3   |
| G 16  | 1593.7 | 239.1 2   |
| Y 17  | 1756.8 | 182.1 1   |

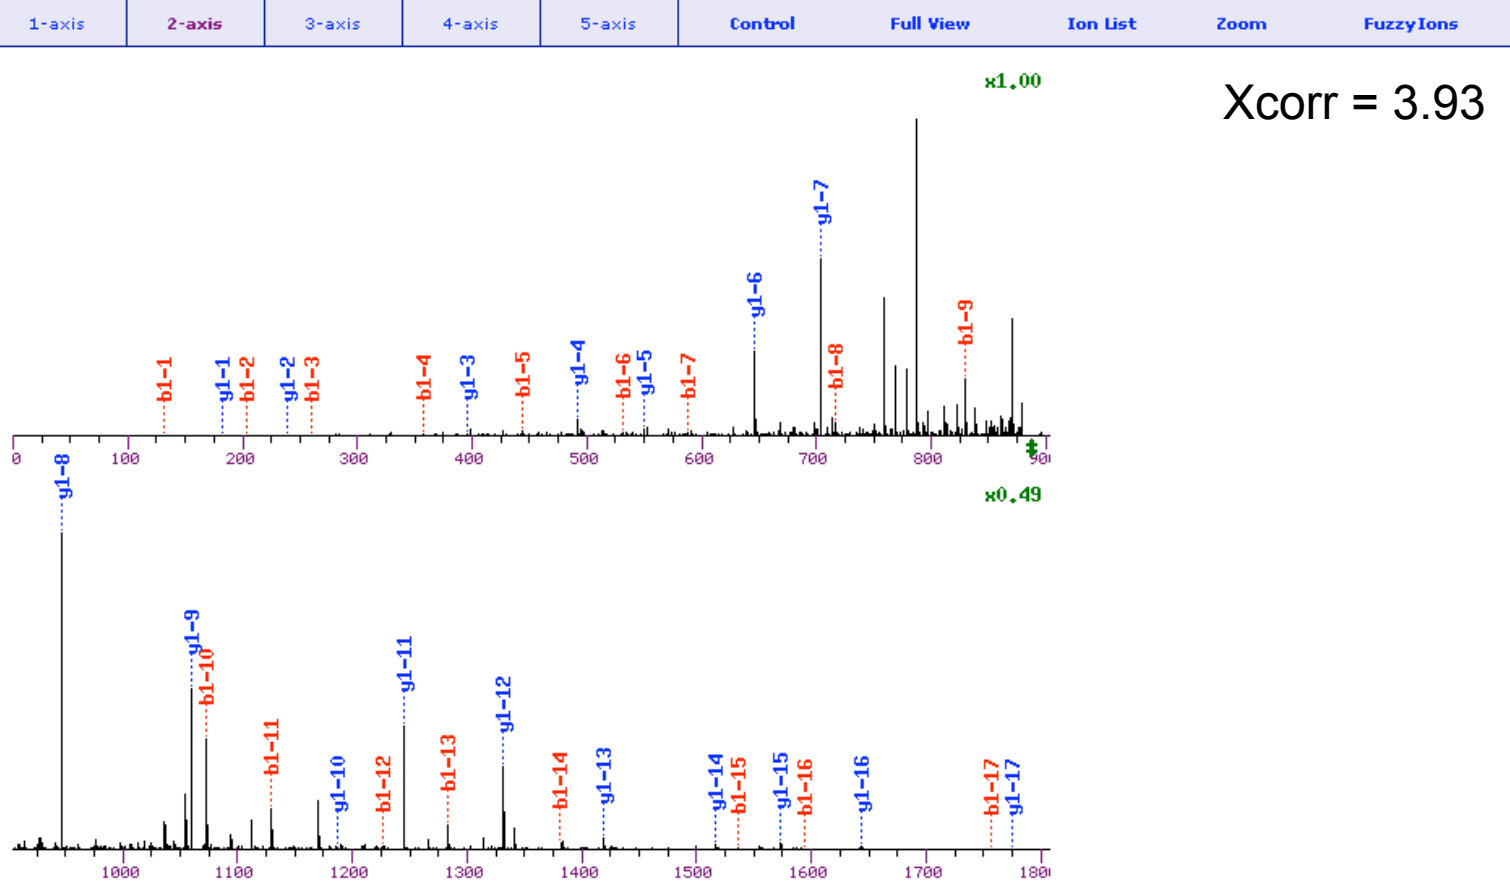

J:/Proteomics/sequest/shill\_641\_MS2\_klc\_641\_WL\_121605c\_src\_cas\_chymo\_exp3/klc\_641\_WL\_121605c\_src\_cas\_chymo\_exp3.4012.1.2.dta MAGPSSGQIY@GPGPRGY Mono

LPP pY245

M.AGPSSGQIY@GPGPRGY.N

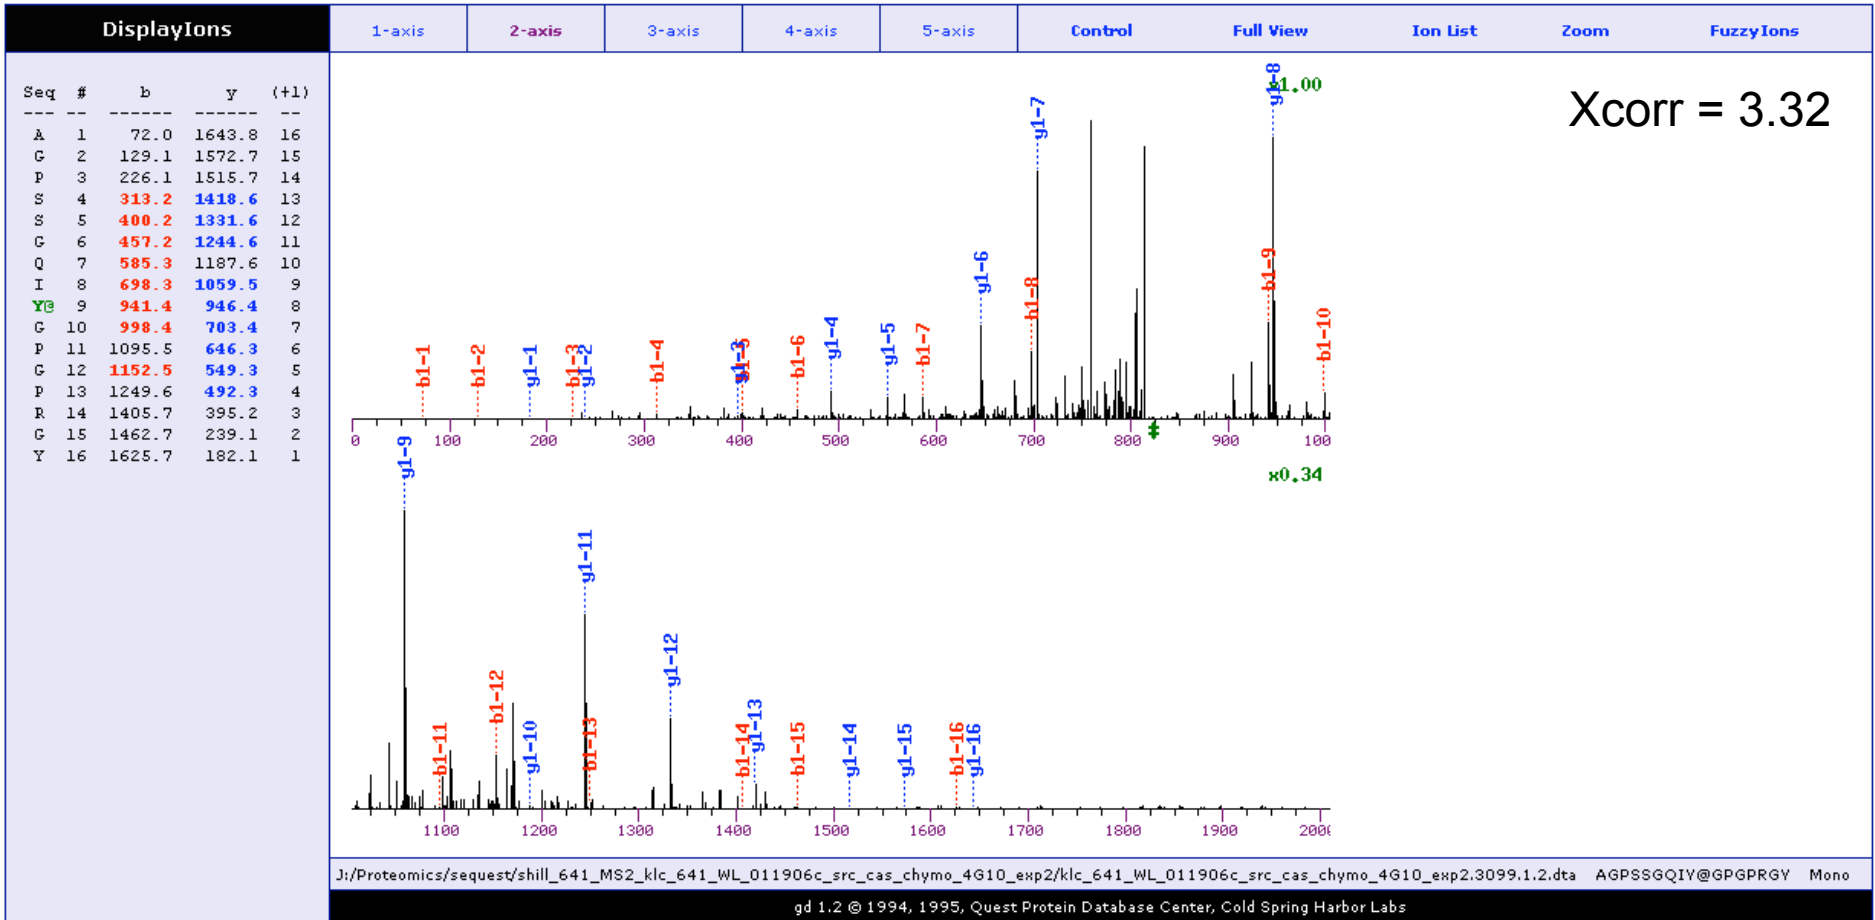



LPP pY245

H.YMAGPSSGQIY@GPGPRGY.N

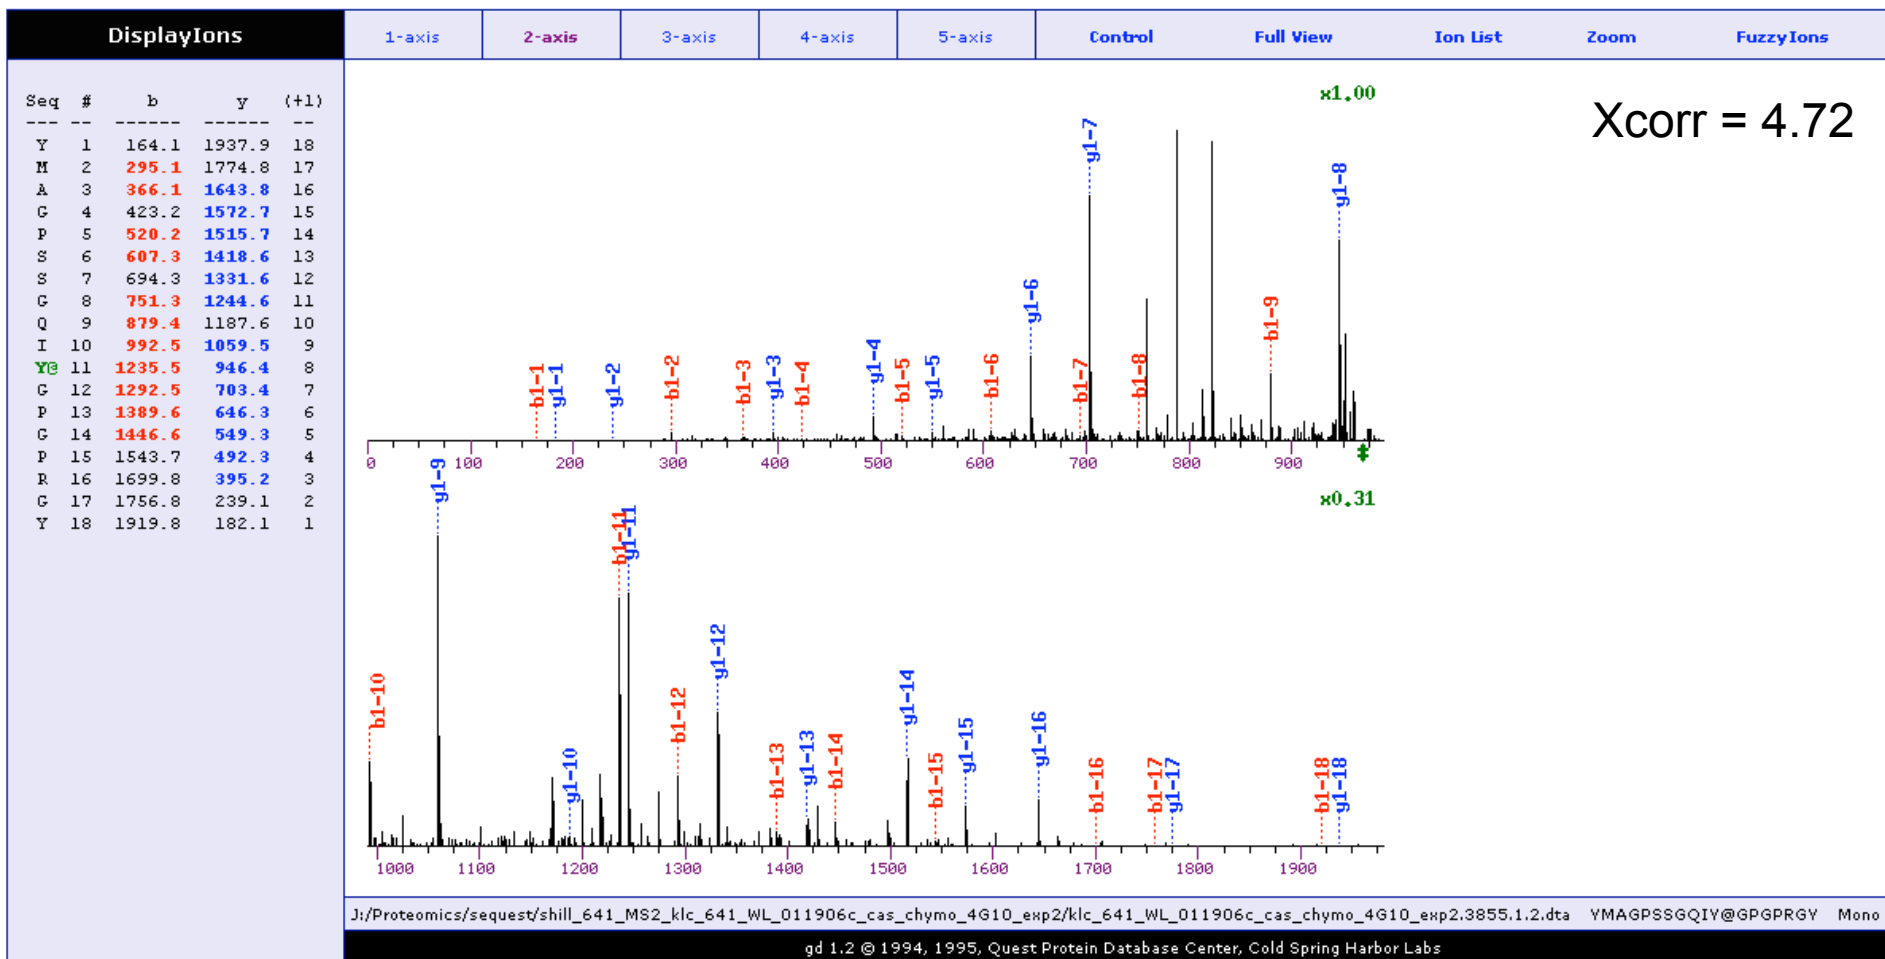

LPP pY245

H.YMAGPSSGQIY@GPGPRGY.N

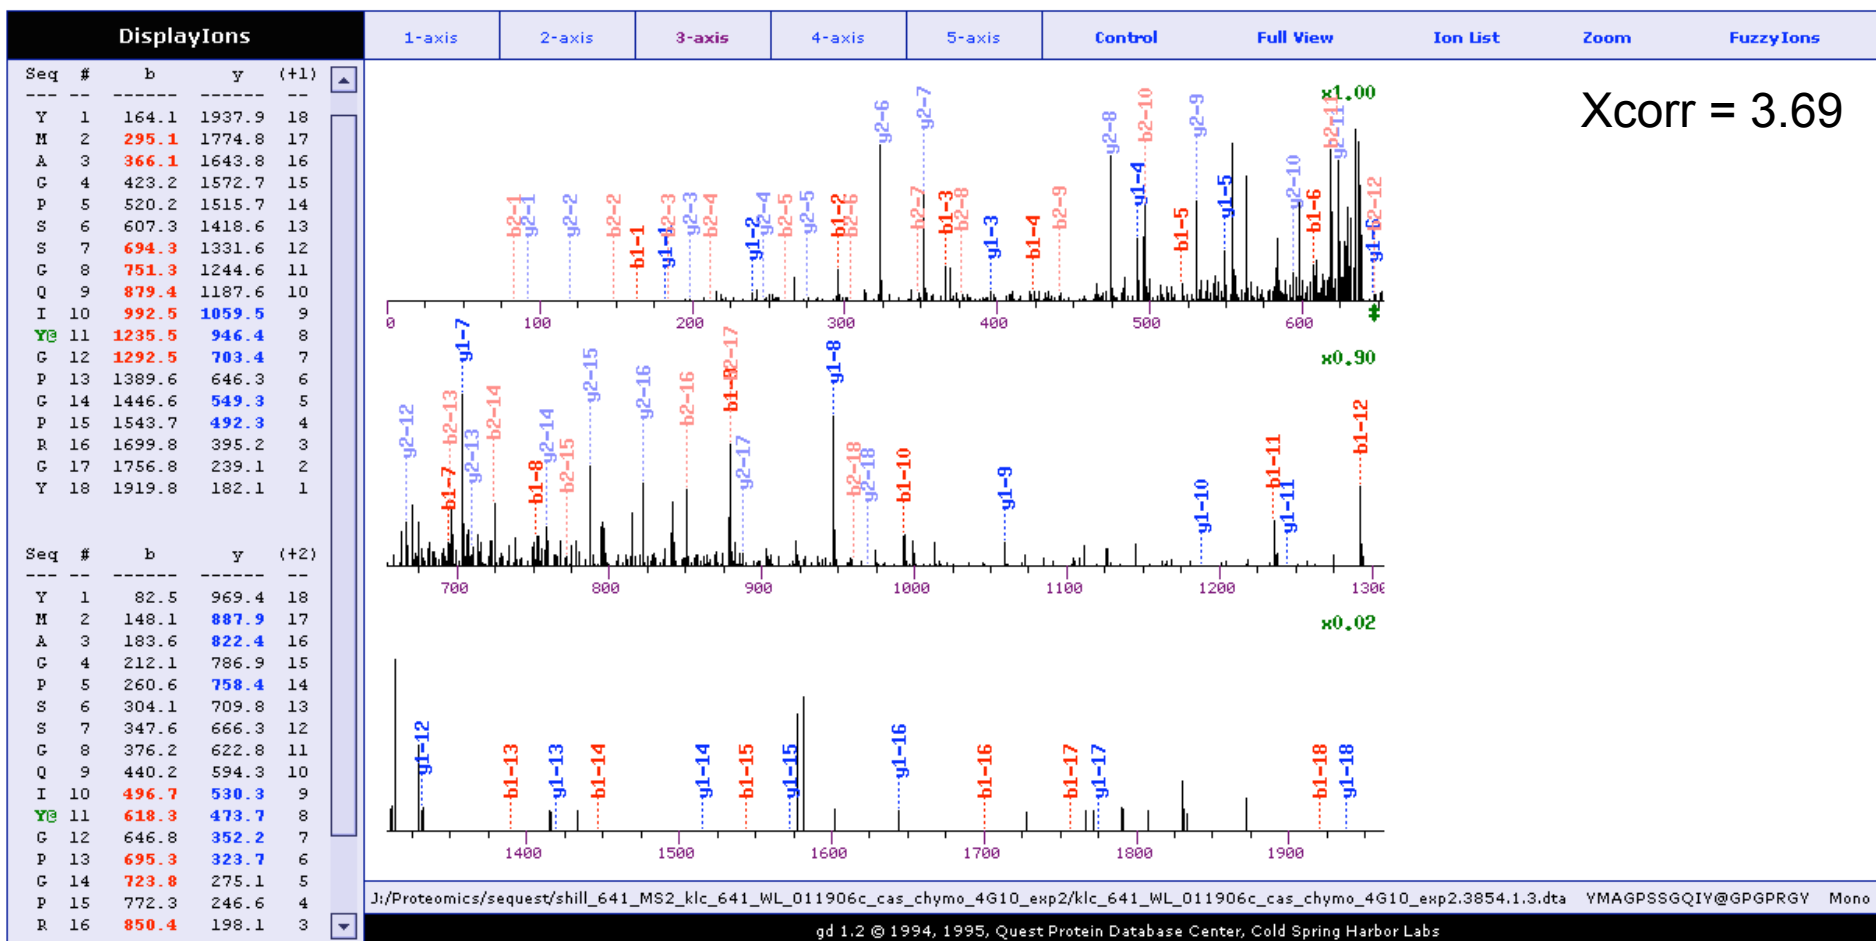

# LPP pY301 R.YYEPY@YAAGPSYGGR.S

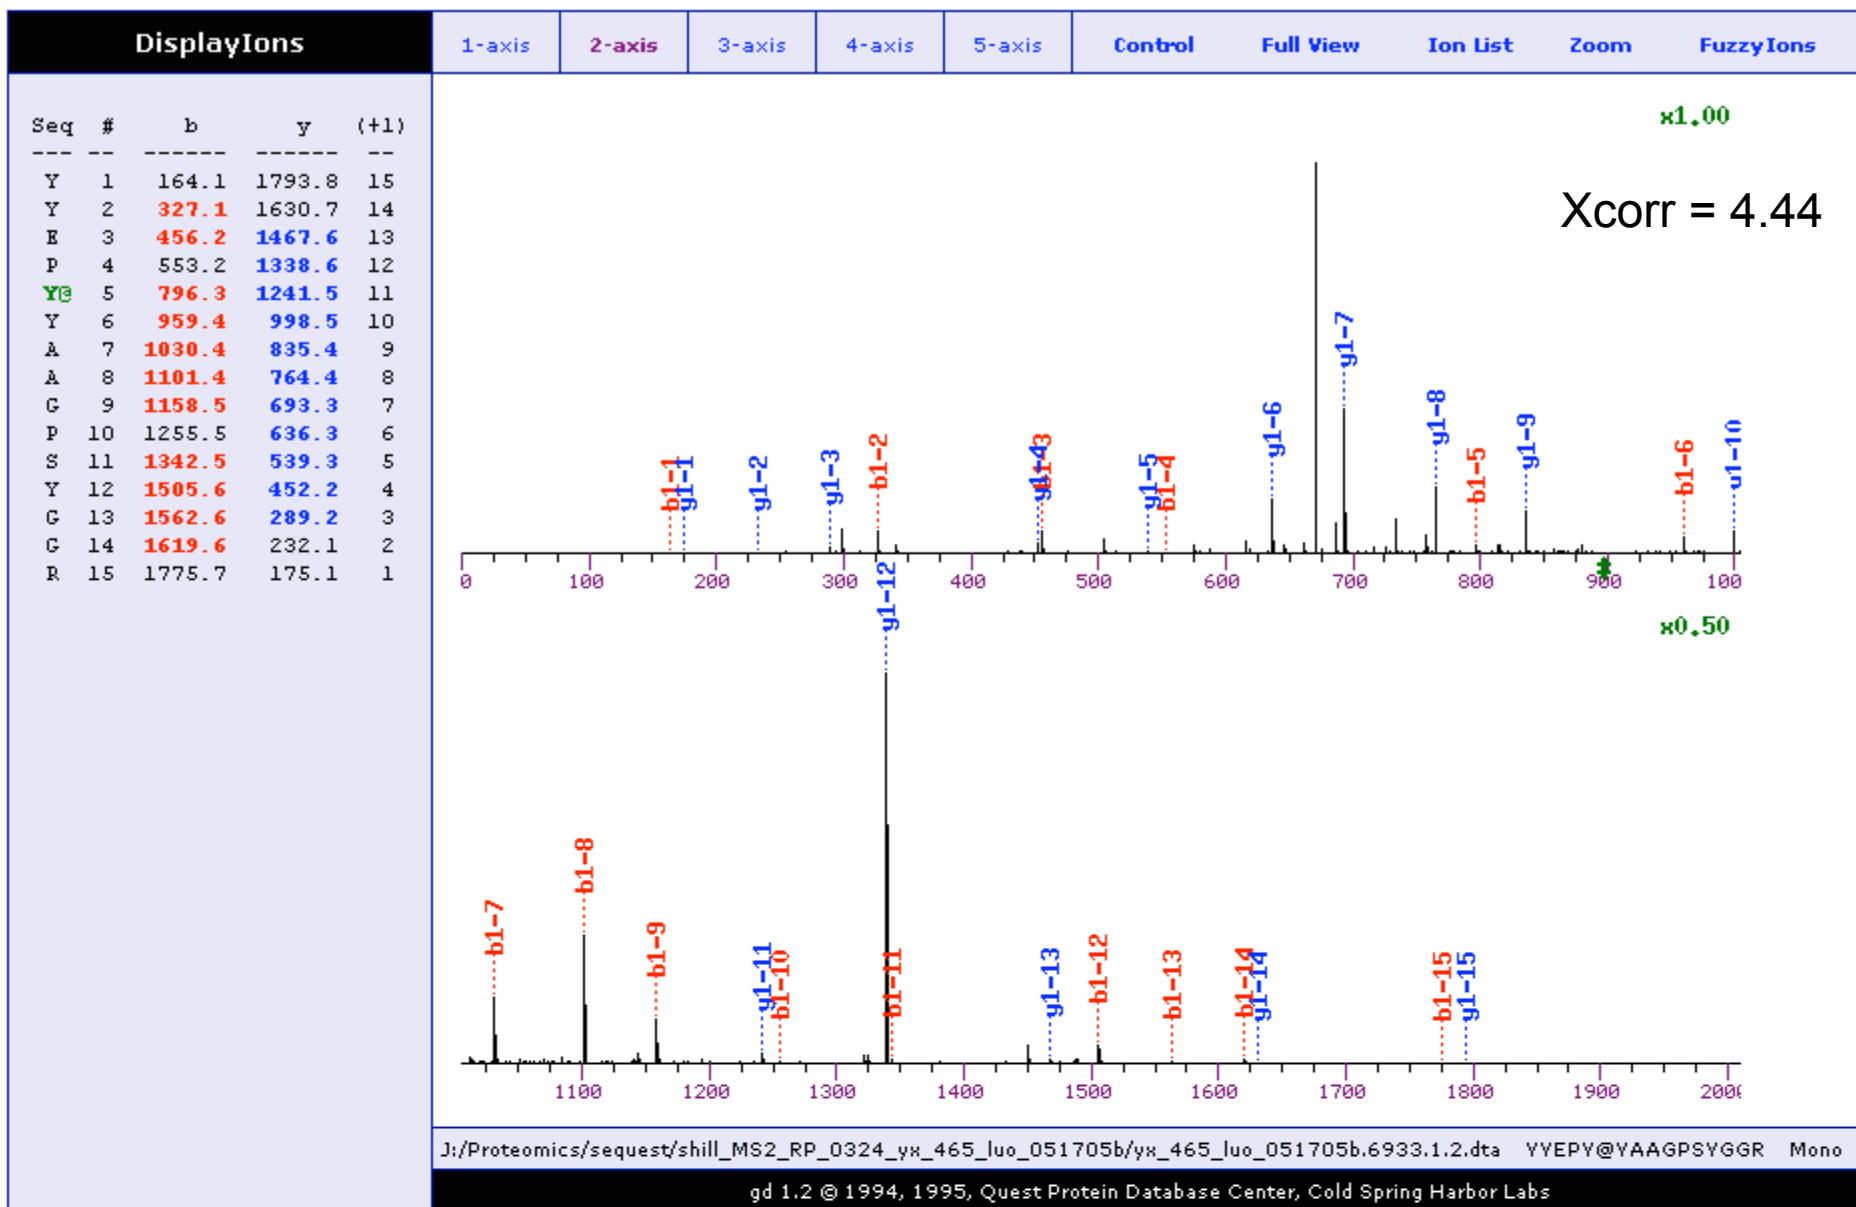

# LPP pY302 R.YYEPYY@AAGPSYGGR.S

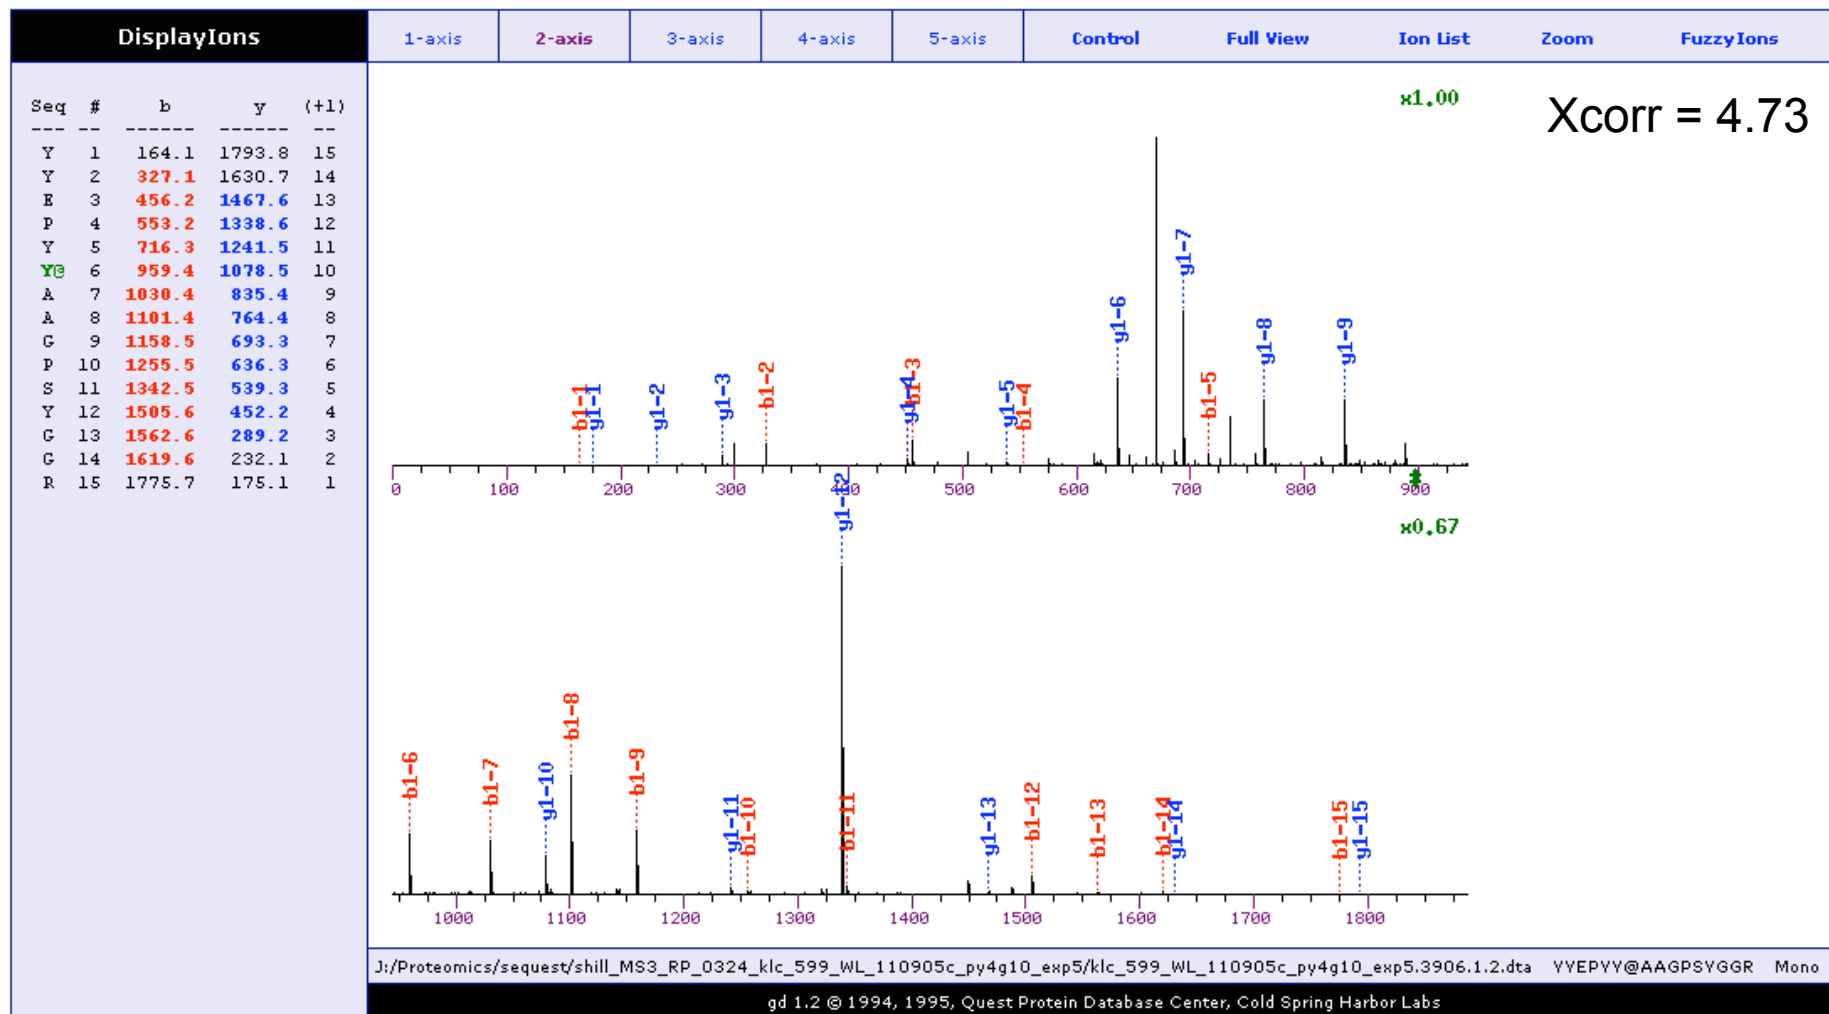

# LPP pY302 R.YYEPYY@AAGPSYGGR.S

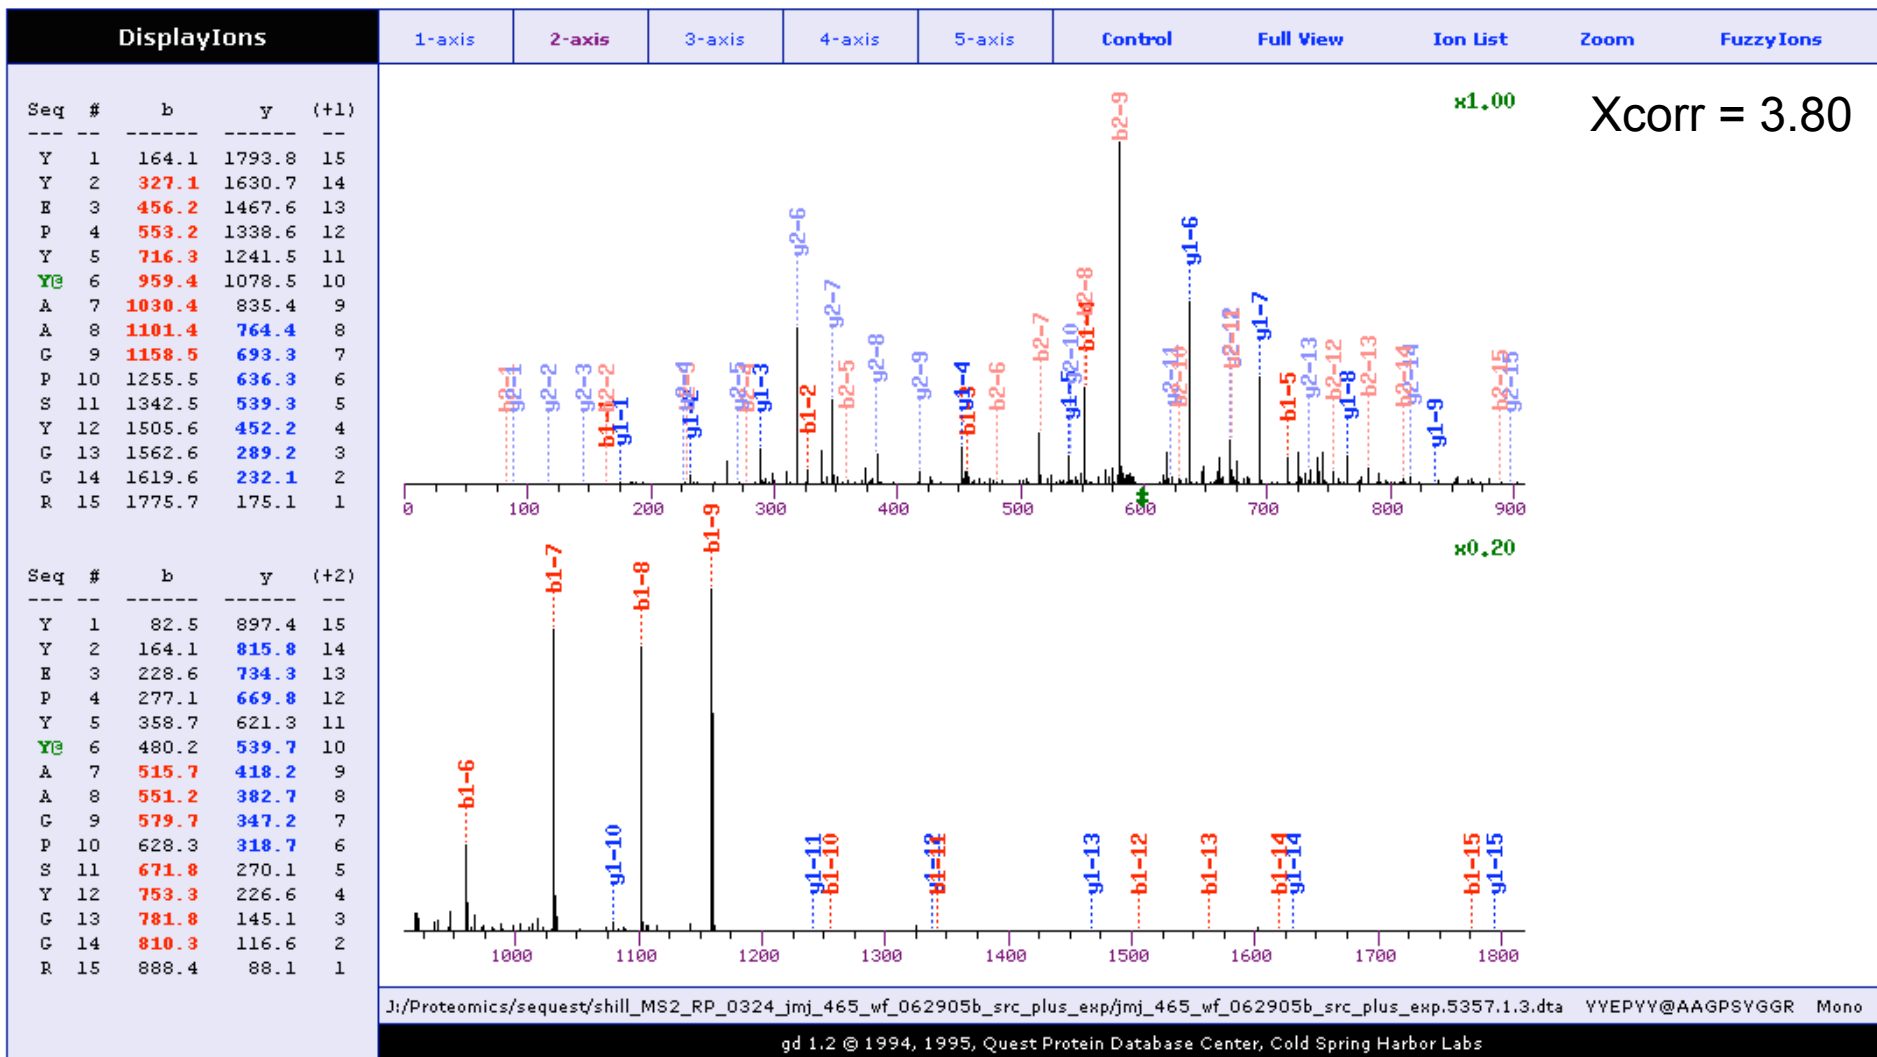

# LPP pY301/pY302 R.YYEPY@Y@AAGPSYGGR.S

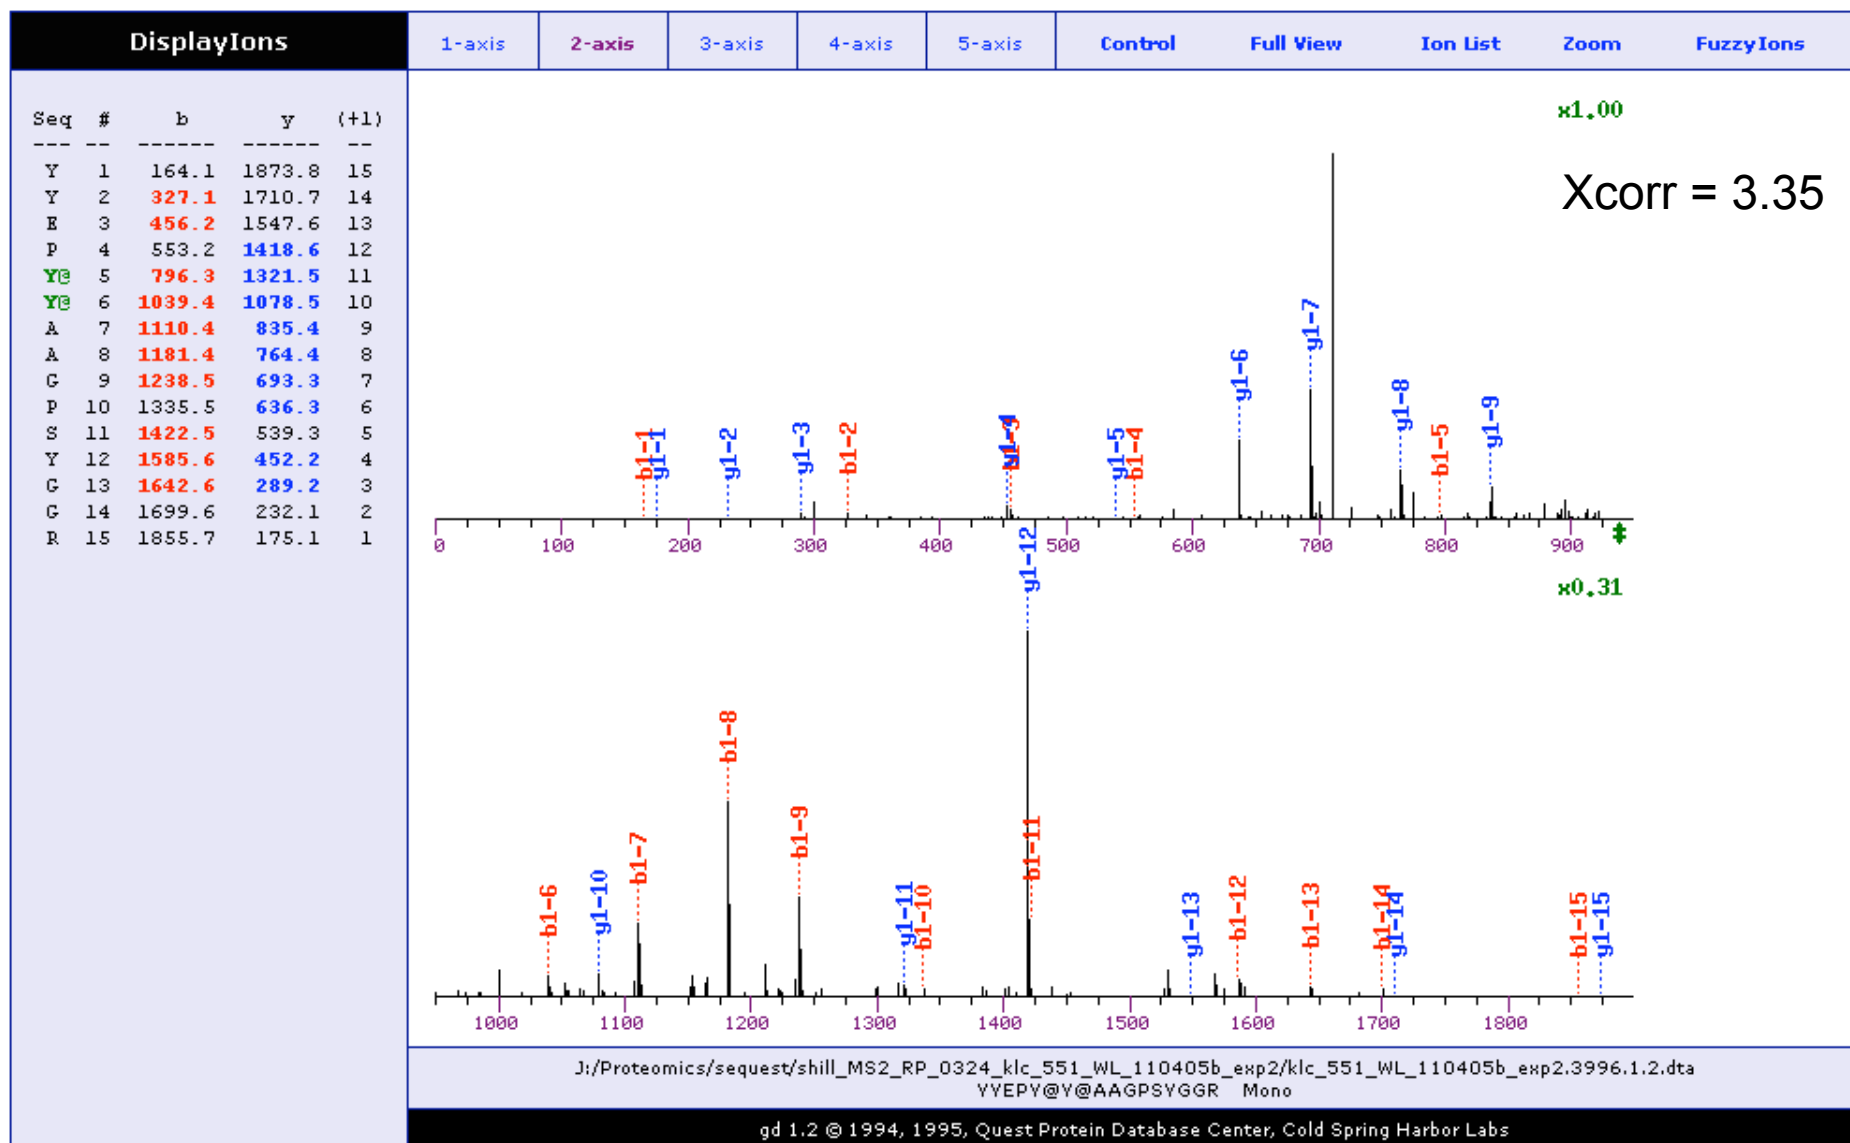

# Paxillin pY118 R.AGEEEHVY@SFPNKQK.S

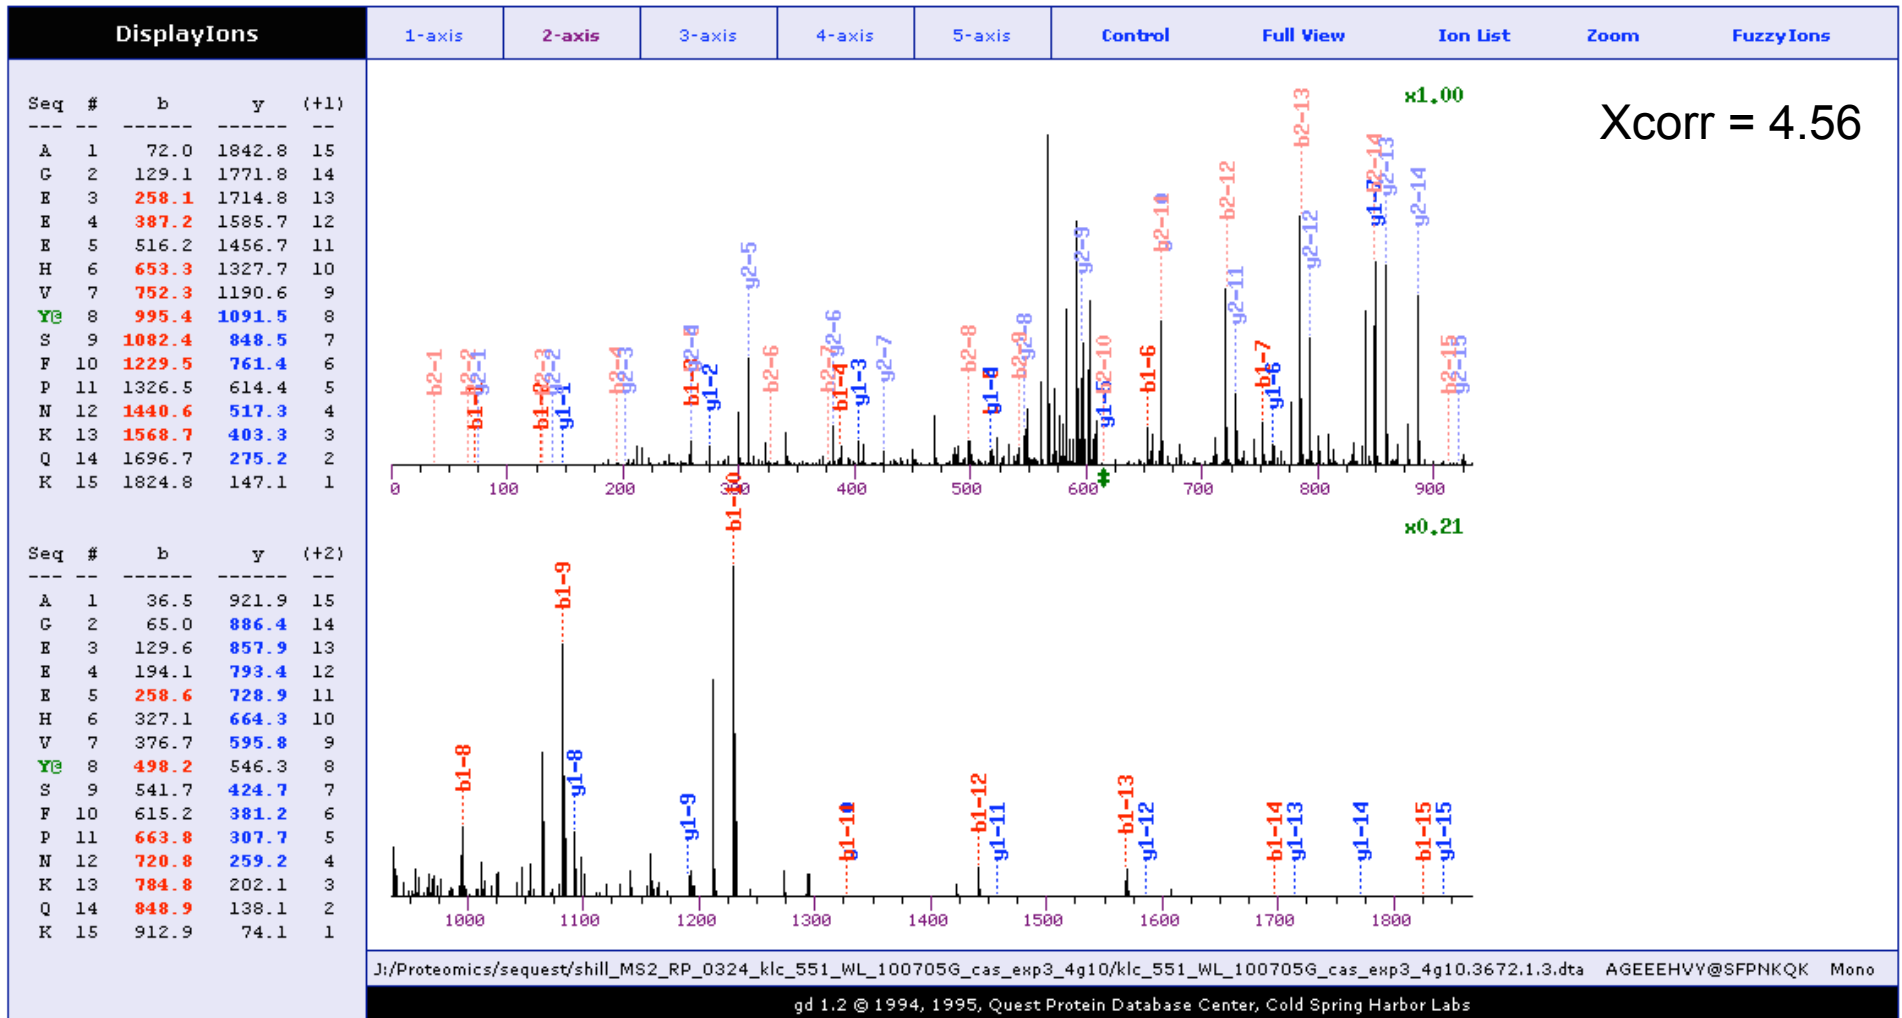

# Paxillin pY118 R.AGEEEHVY@SFPNK.Q

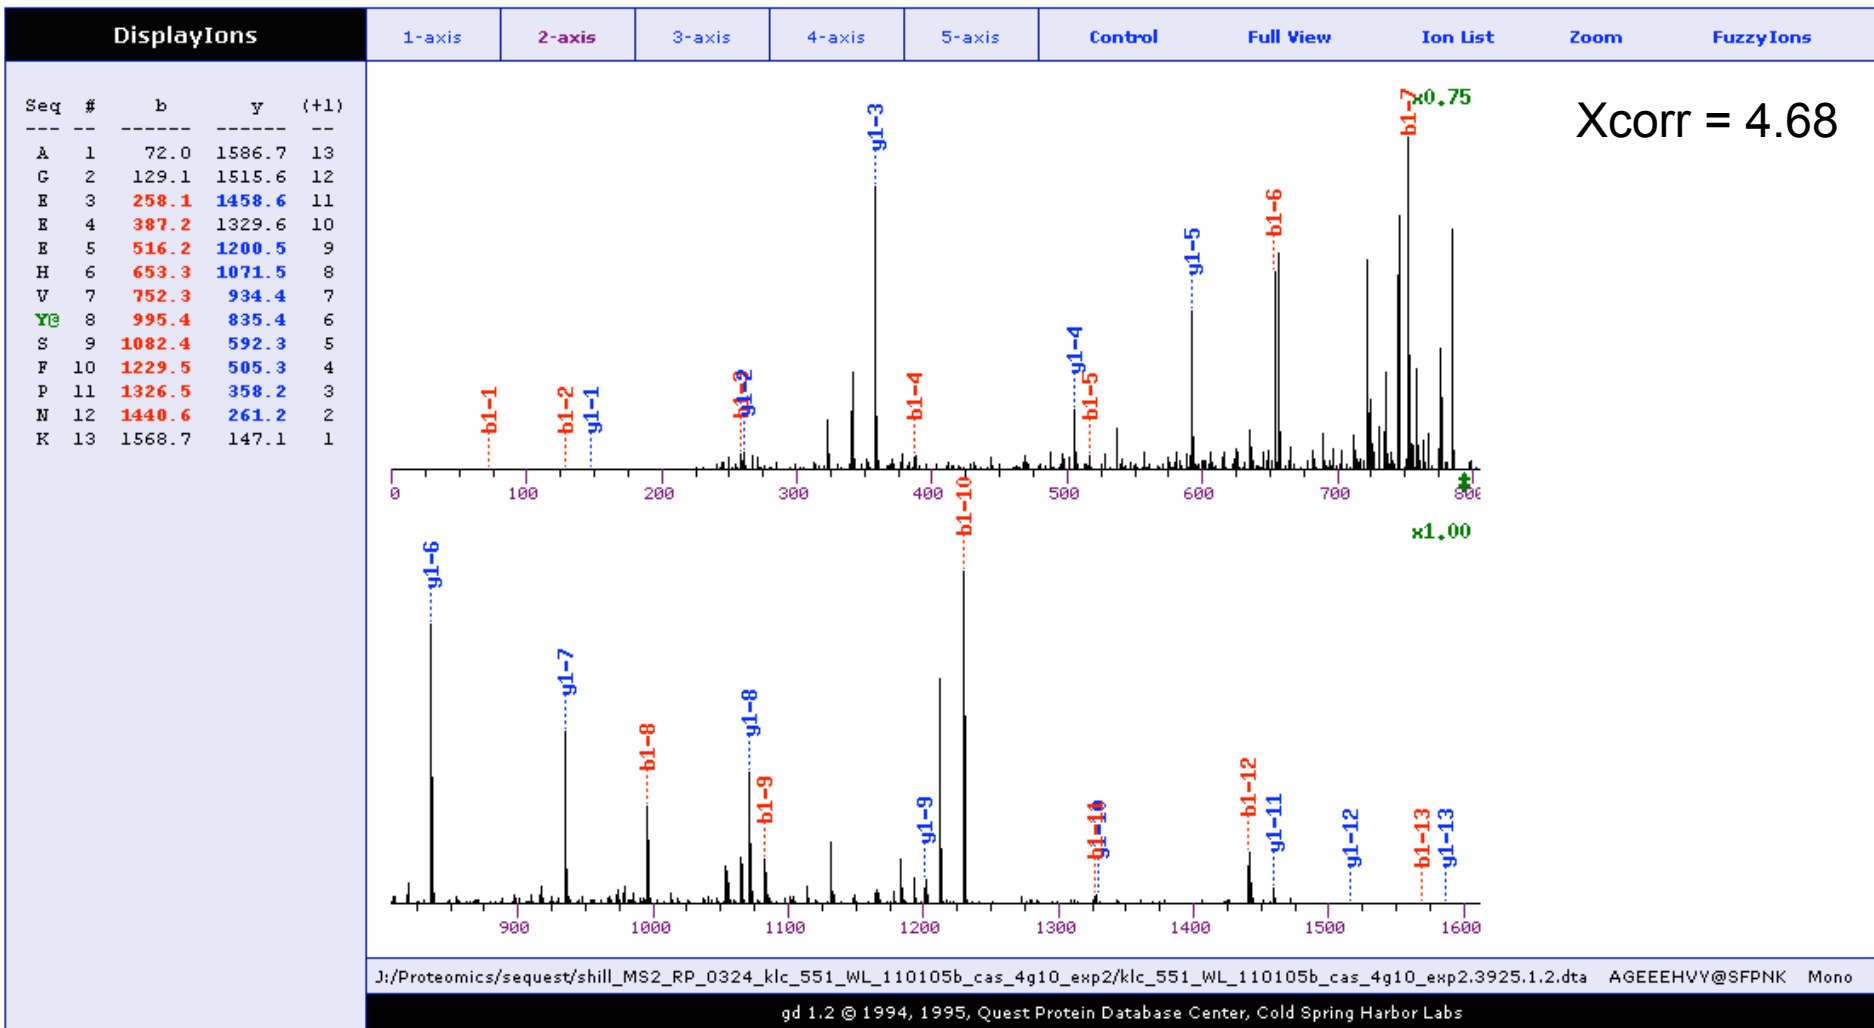



# Talin 1 pY26

K.TMQFEPSTMVY@DAC\*R.M

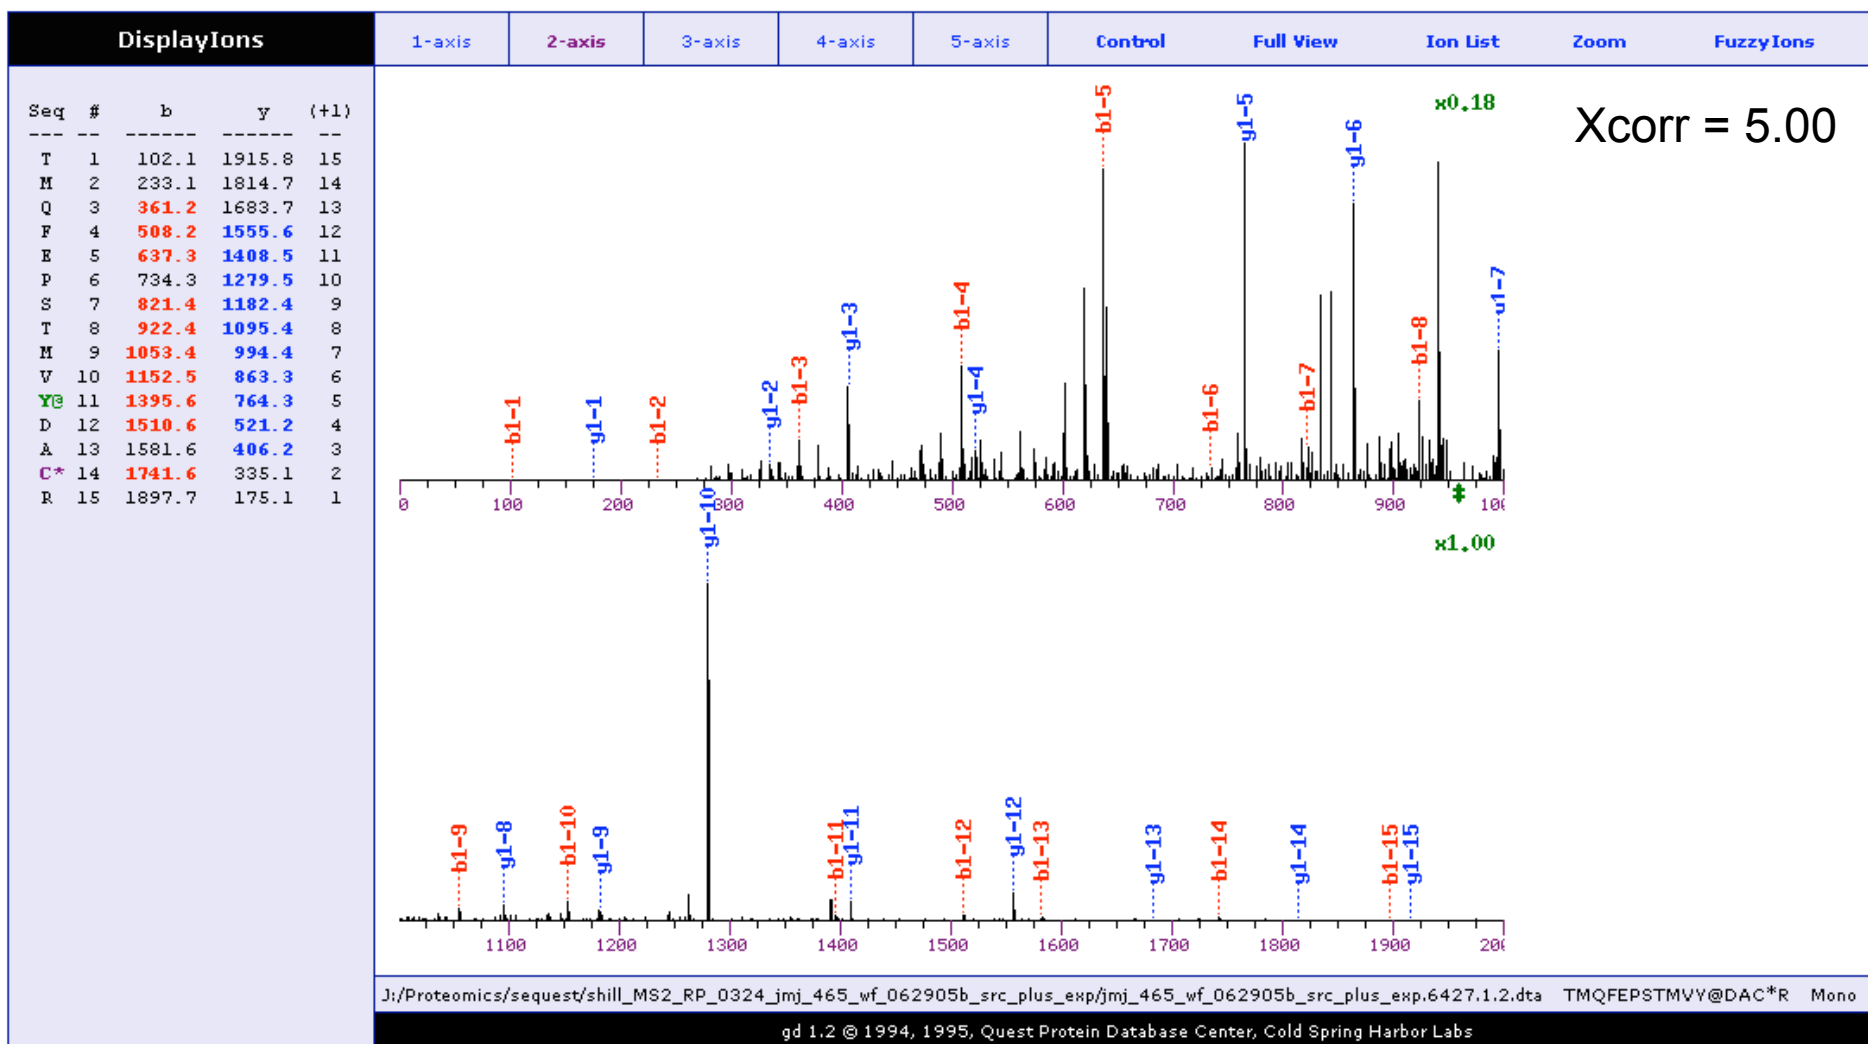

# Talin 1 pY26

K.TMQFEPSTMVY@DAC\*R.M

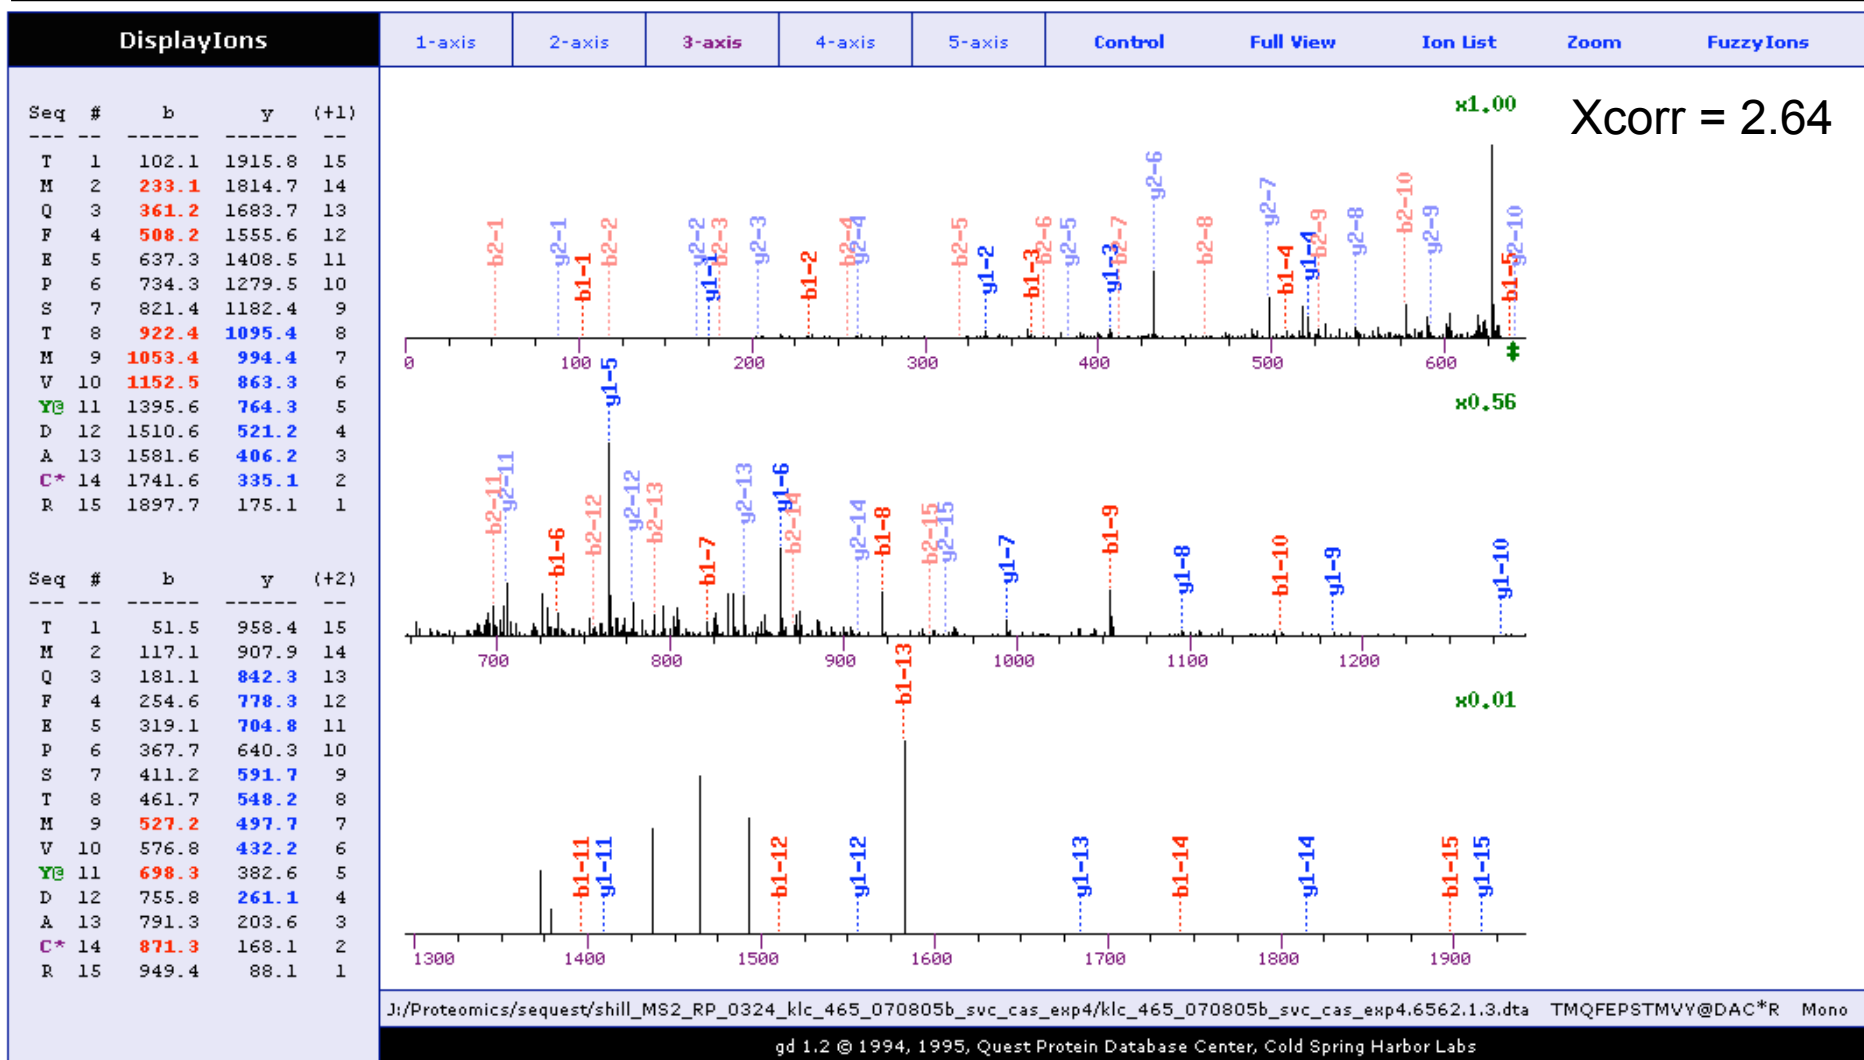

# Talin 1 pY26

K.TM#QFEPSTMVY@DAC\*R.M

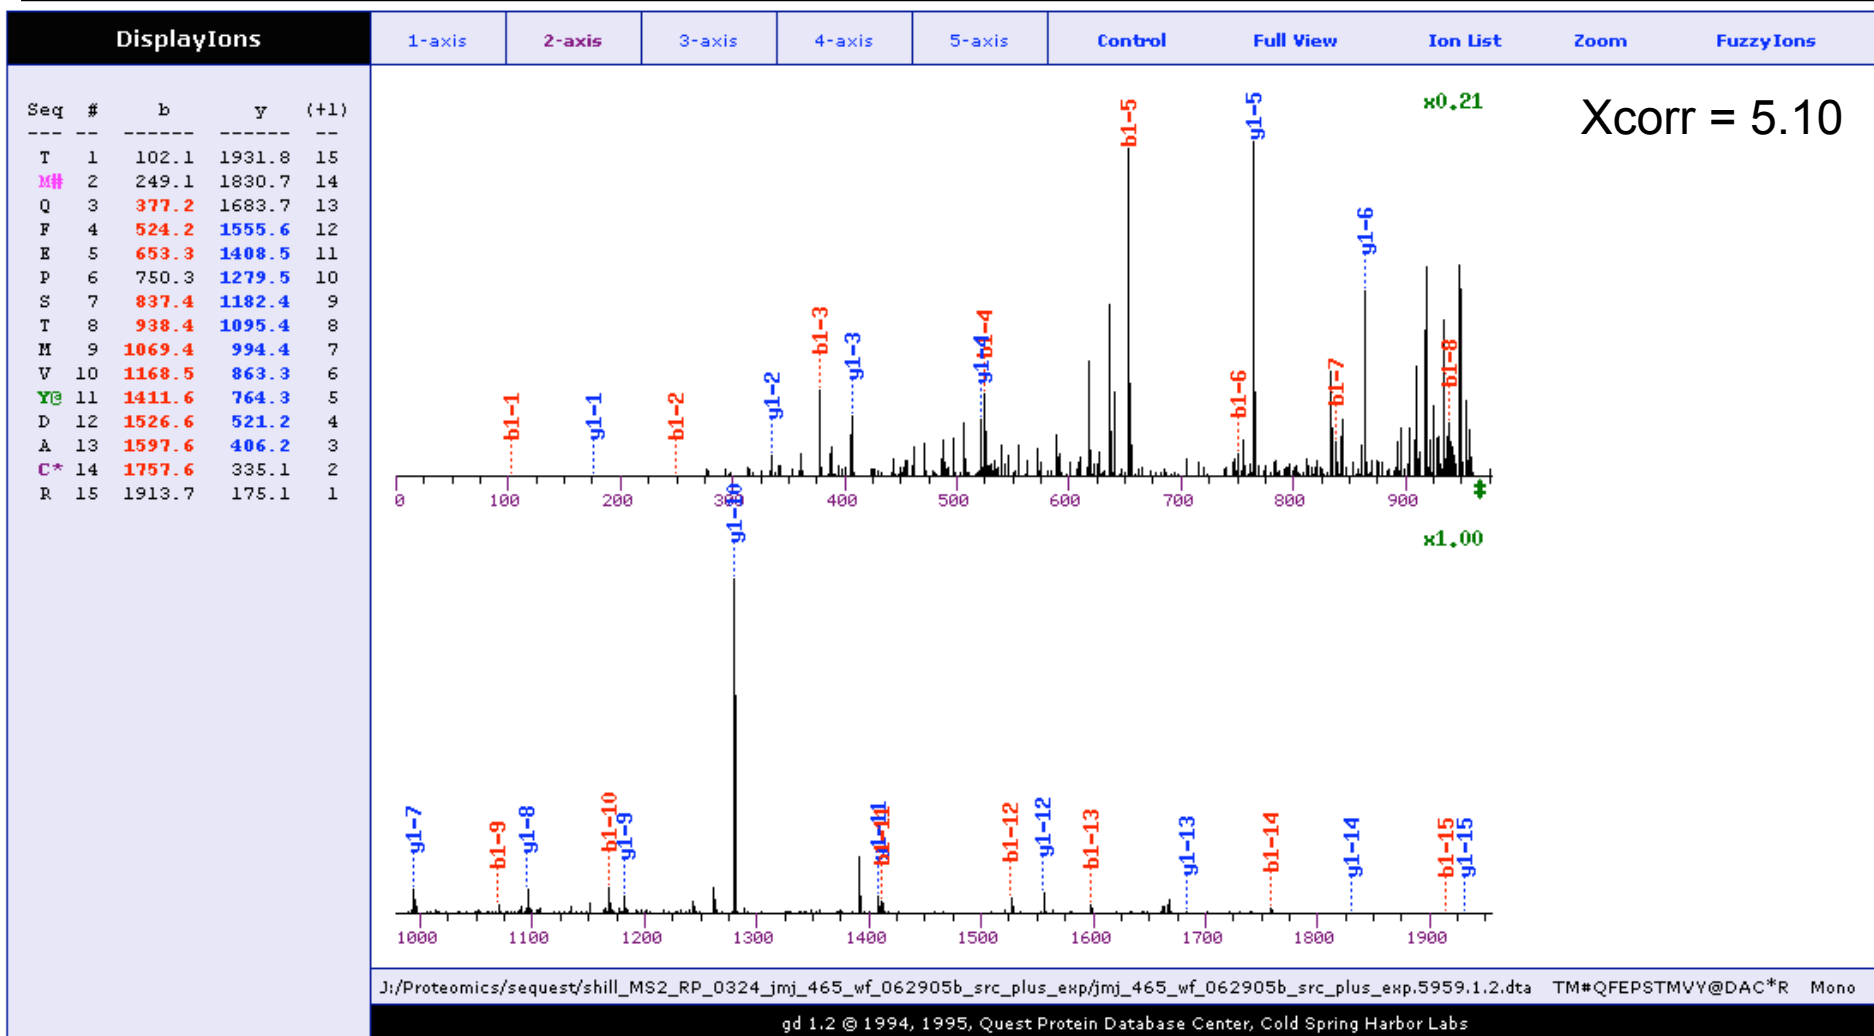

# Talin 1 pY70

K.ALDY@YMLR.N

## DisplayIons

| Seq #       | b      | y      | (+1) |
|-------------|--------|--------|------|
| A 1         | 72.0   | 1124.5 | 8    |
| L 2         | 185.1  | 1053.5 | 7    |
| D 3         | 300.2  | 940.4  | 6    |
| <b>Y@</b> 4 | 543.2  | 825.4  | 5    |
| Y 5         | 706.3  | 582.3  | 4    |
| M 6         | 837.3  | 419.2  | 3    |
| L 7         | 950.4  | 288.2  | 2    |
| R 8         | 1106.5 | 175.1  | 1    |

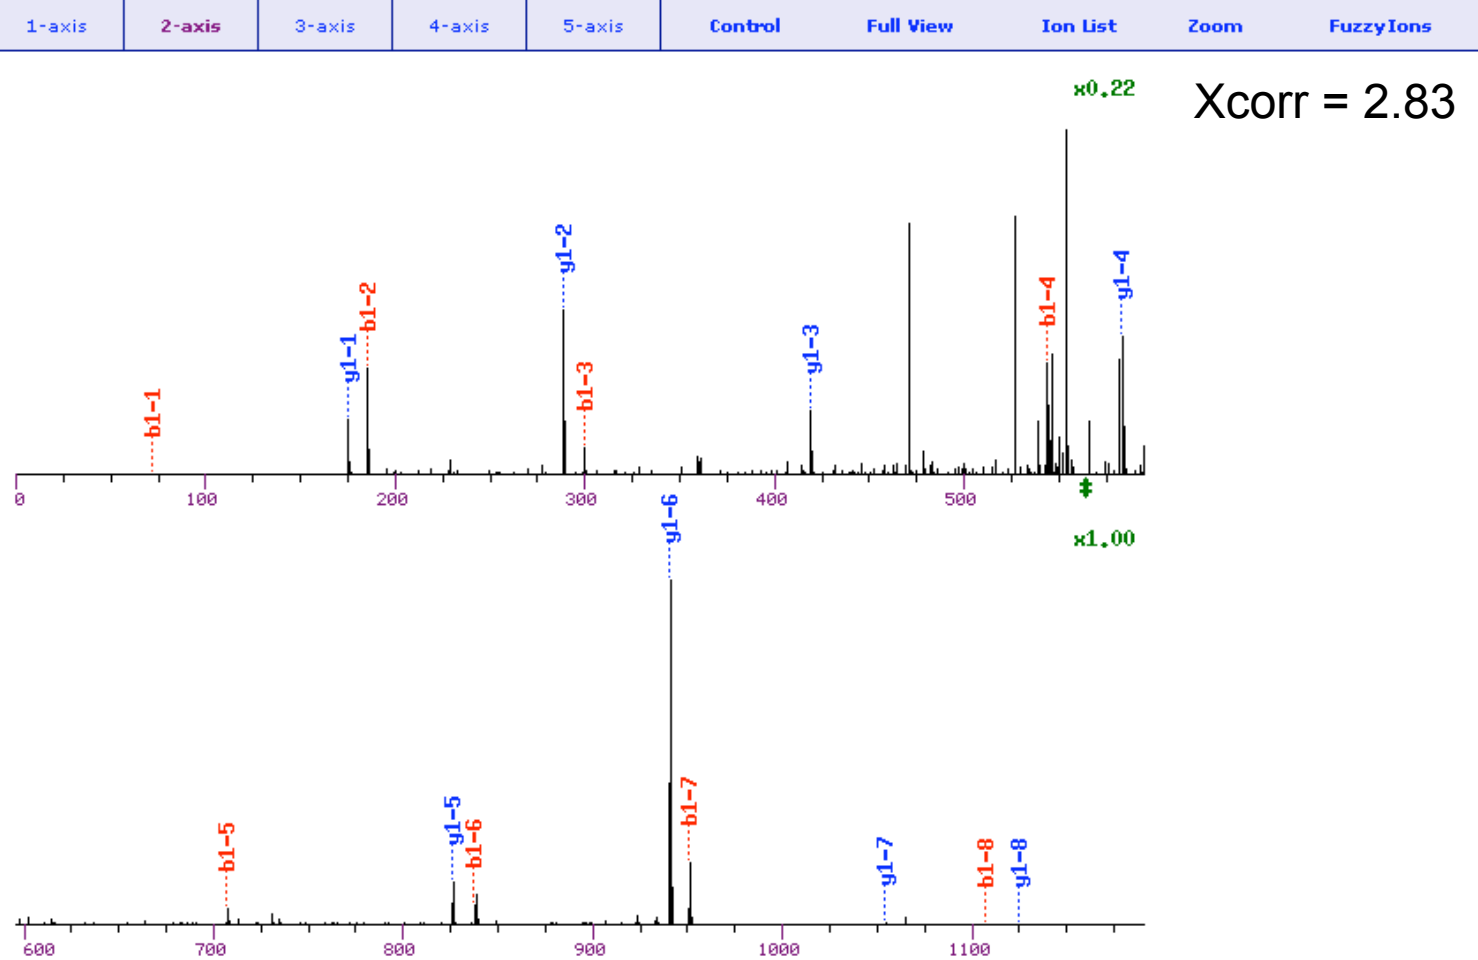

Xcorr = 2.83

J:/Proteomics/sequest/shill\_MS2\_RP\_0324\_klc\_551\_WL\_100705G\_cas\_exp3\_4g10/klc\_551\_WL\_100705G\_cas\_exp3\_4g10.5815.1.2.dta ALDY@YMLR Mono

# p120 catenin pY96 K.LNGPQDHNHLLY@STIPR.M

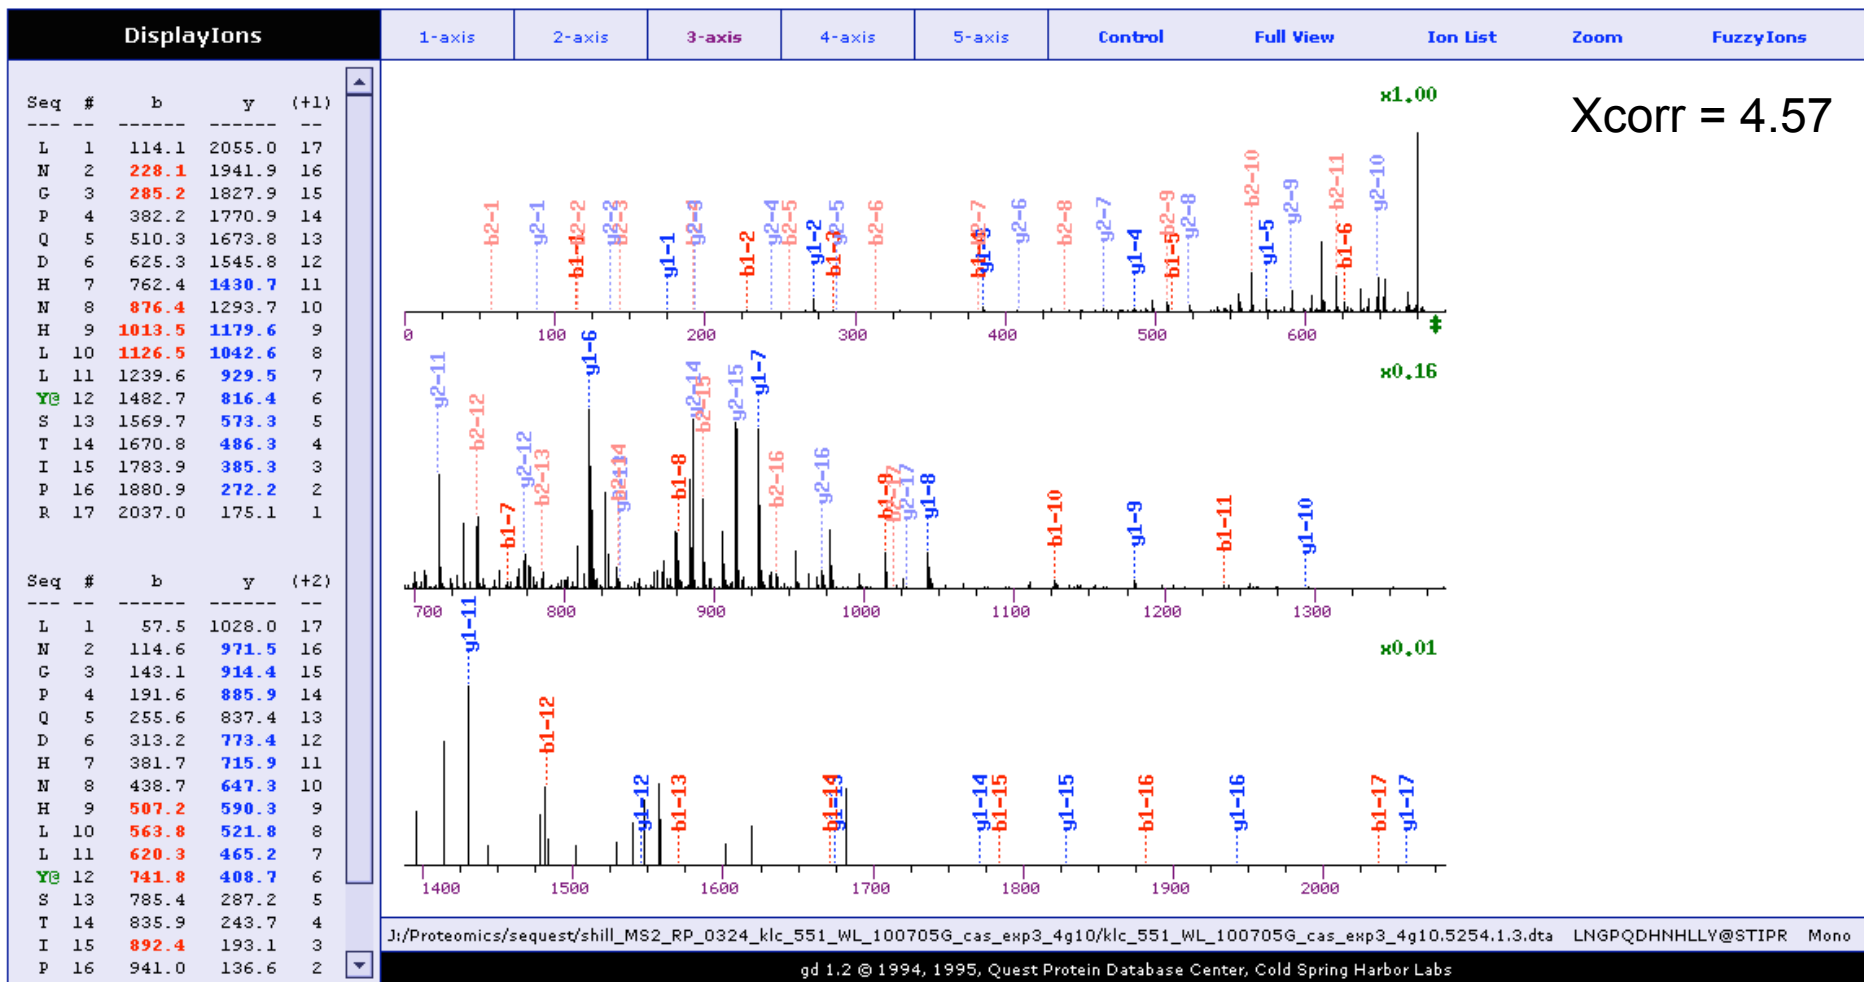

p120 catenin pY96 K.LNGPQDHNHLLY@STIPR.M

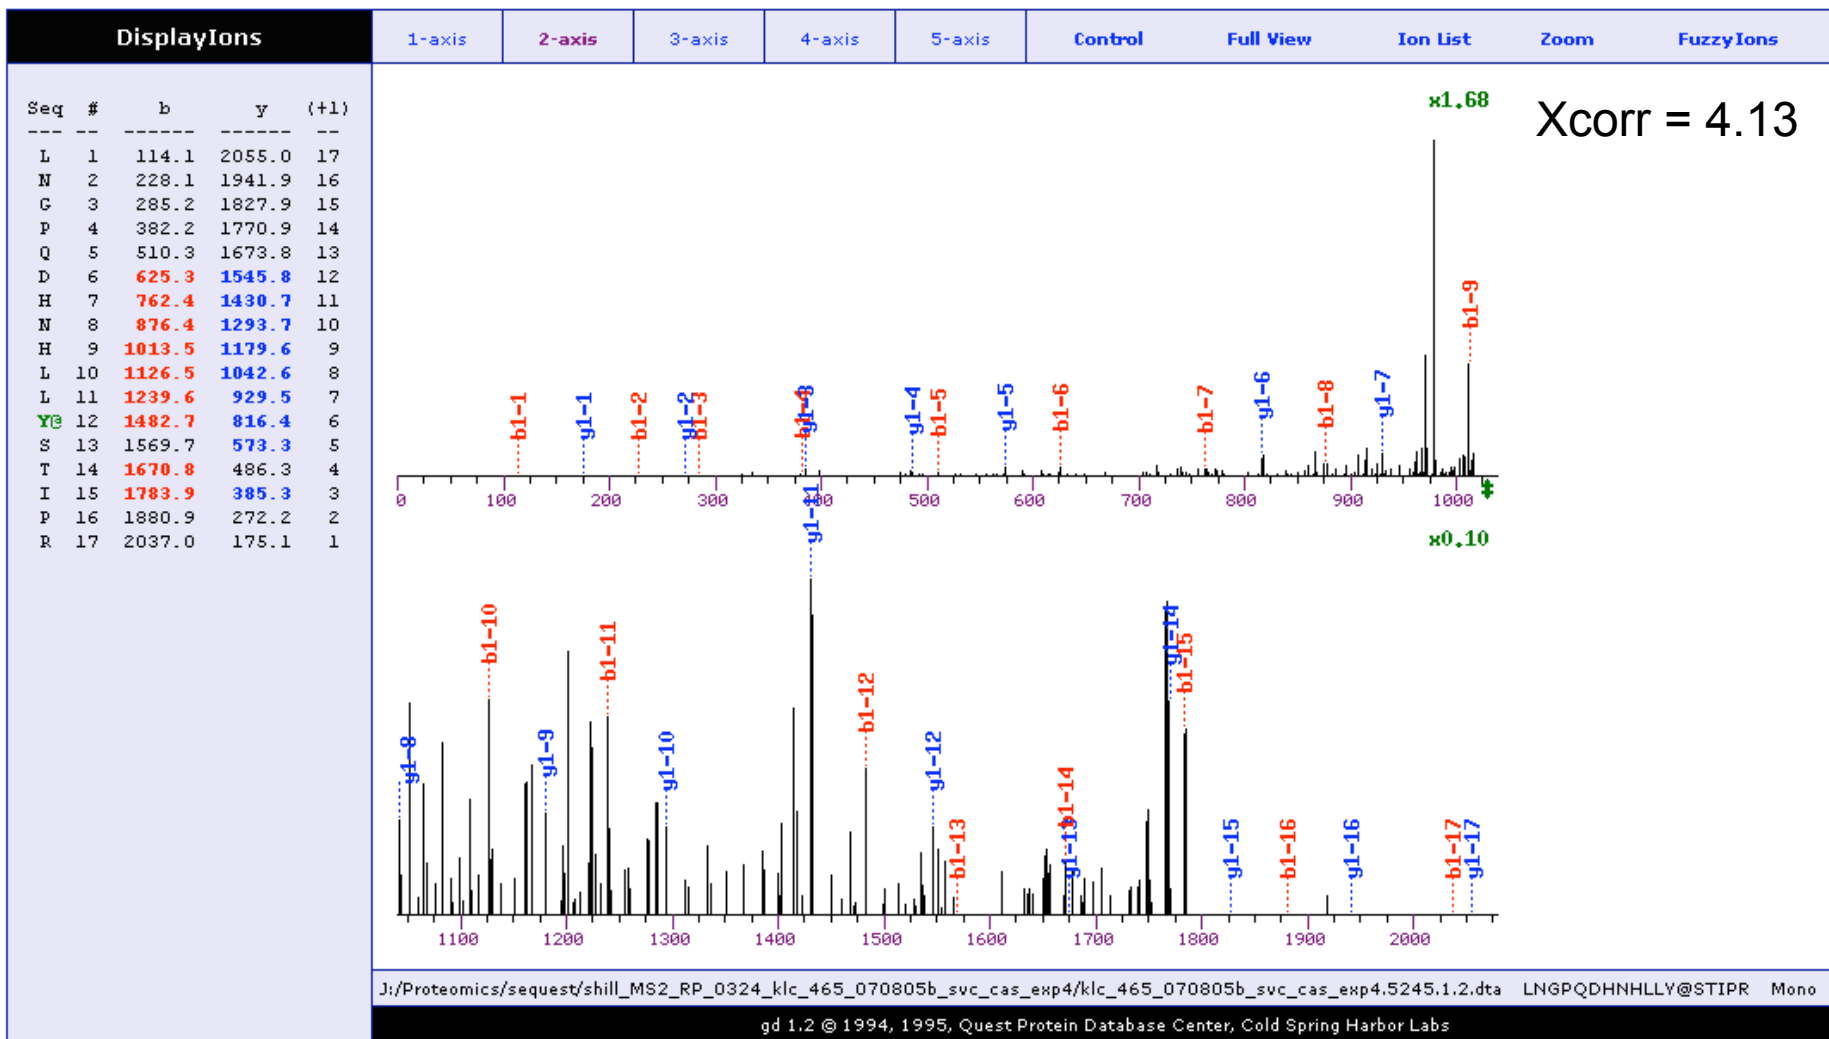

p120 catenin pY228

R.HYEDGYPGSDNY@GSLSR.V

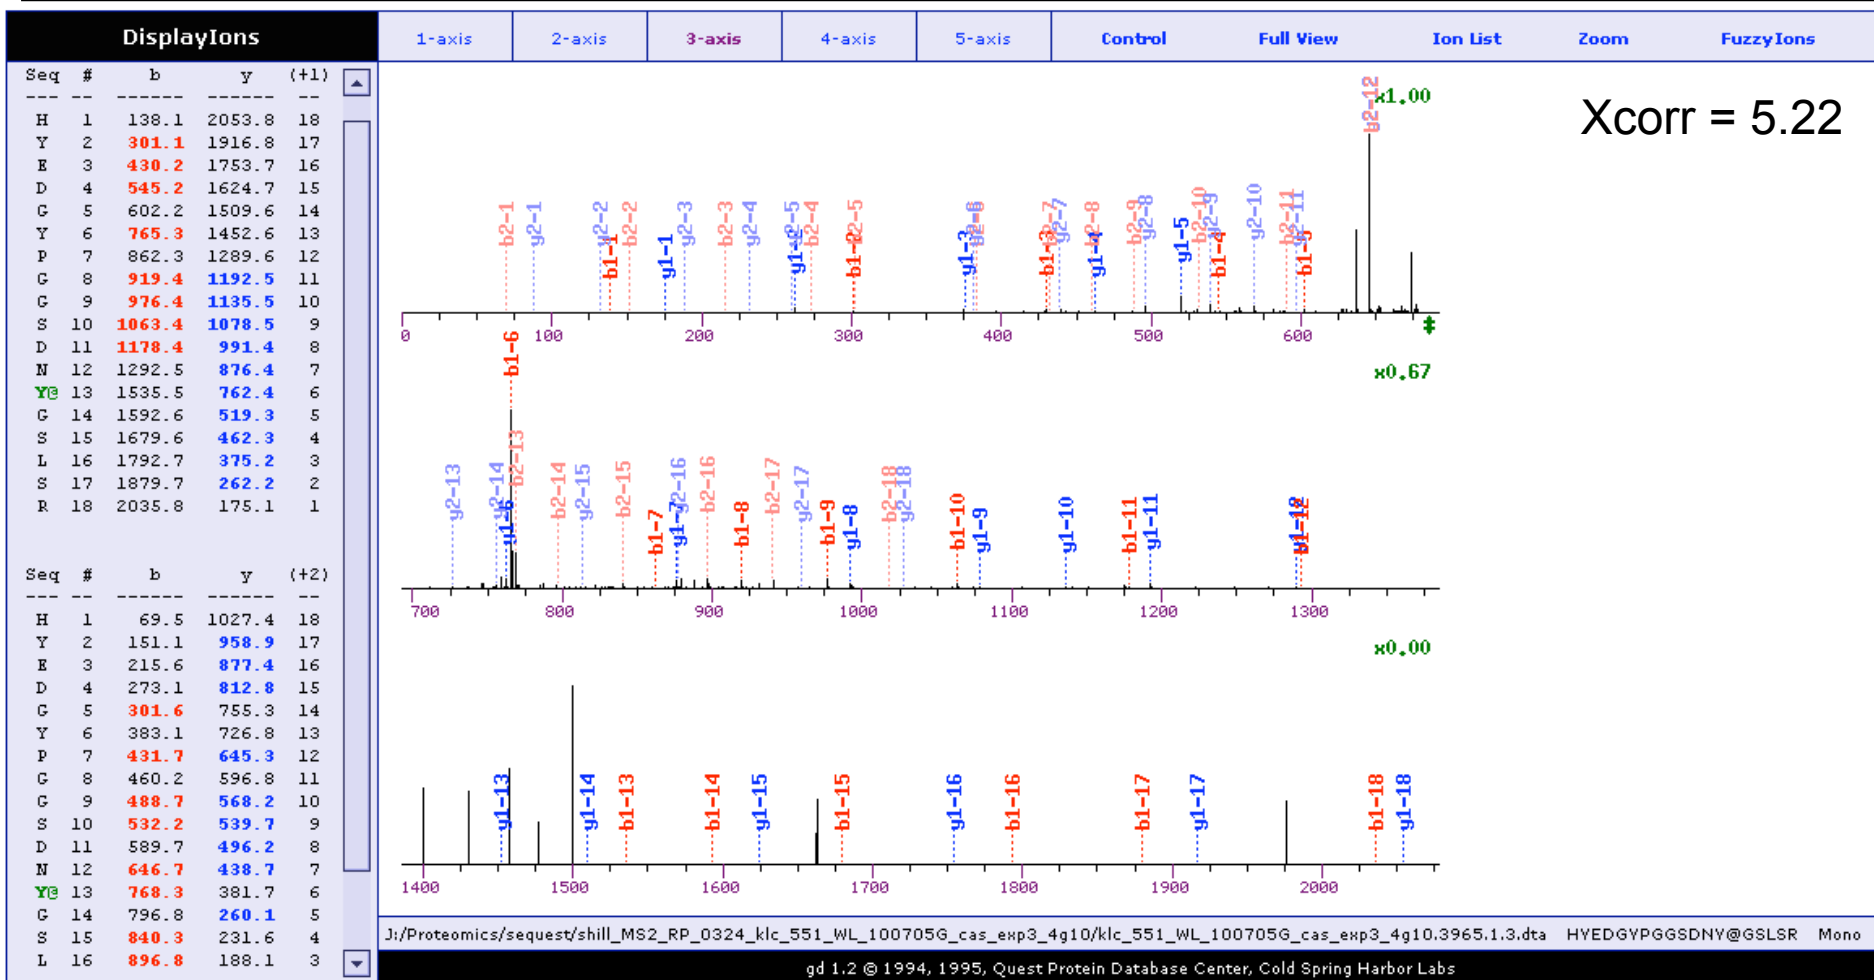

p120 catenin pY228

R.HYEDGYPGGSDNY@GSLSR.V

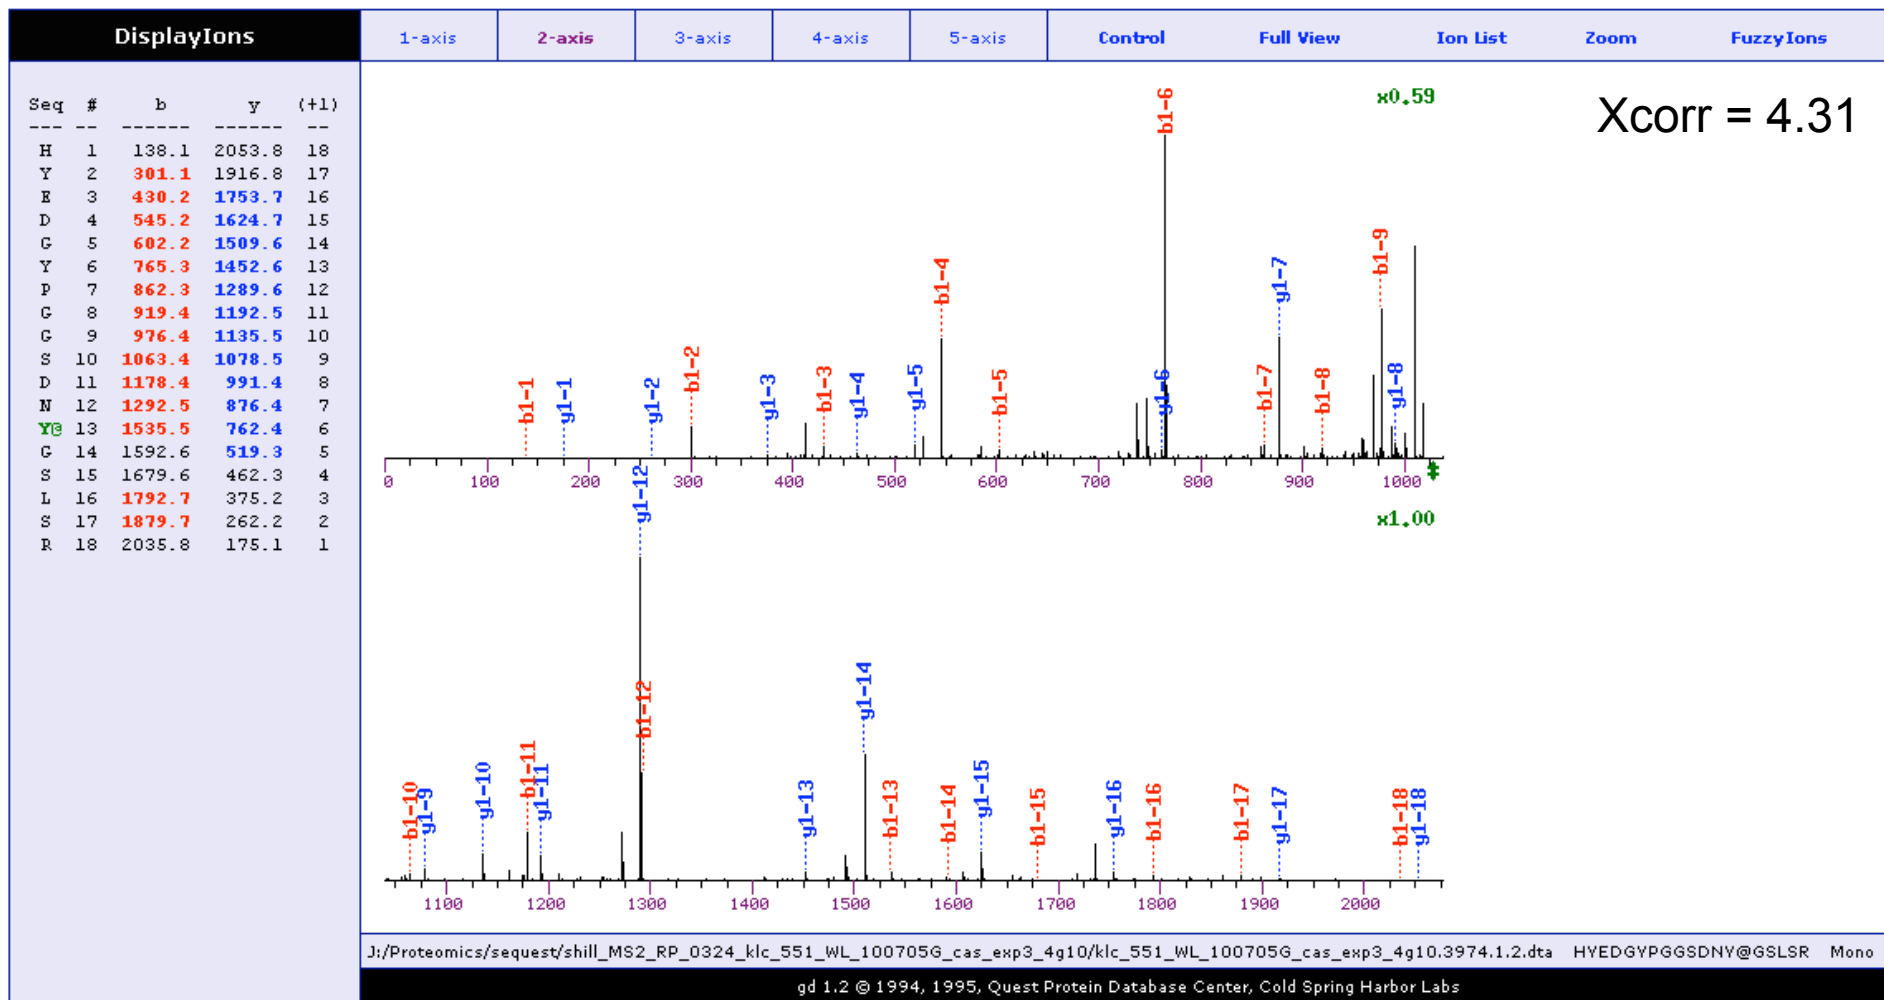



p120 catenin pY228

R.HYEDGYPGGSDNY@GS^LSR.V

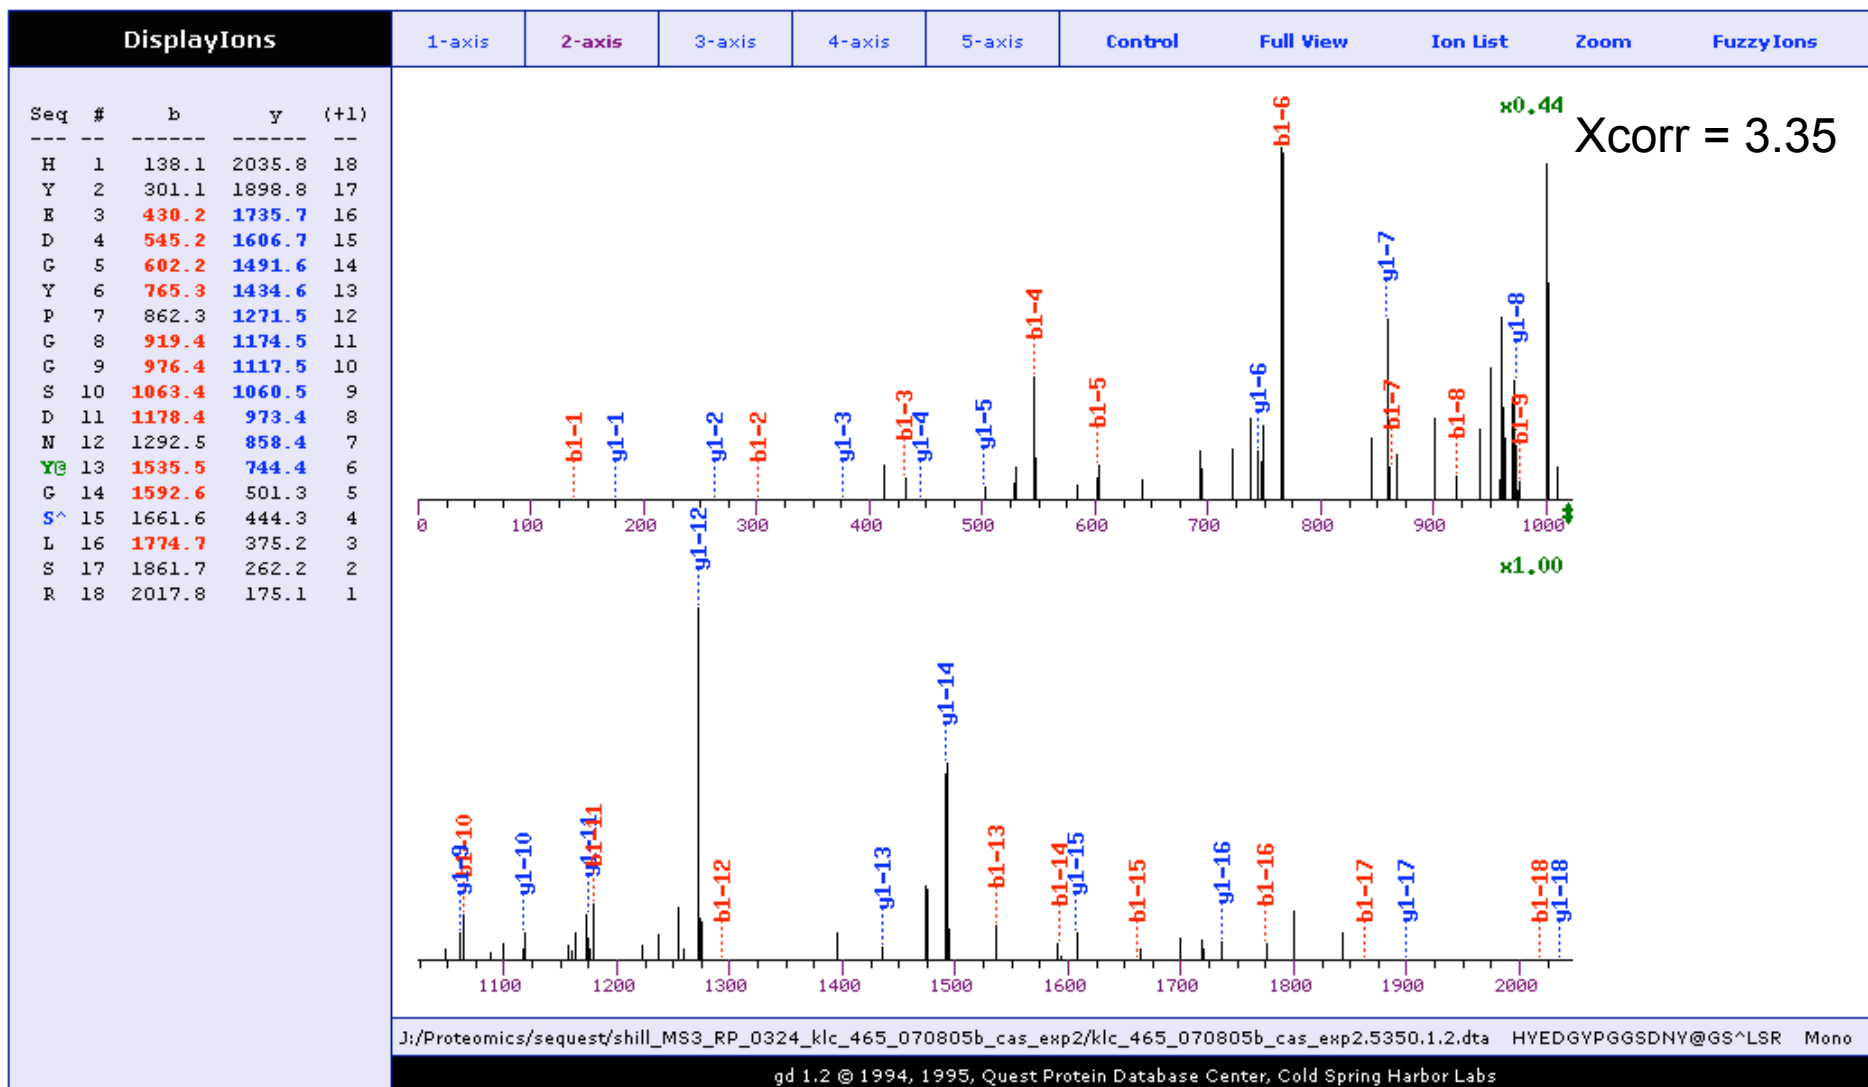

ZO-1 pY1164

R.HEEQPAPAY@EVHNR.Y

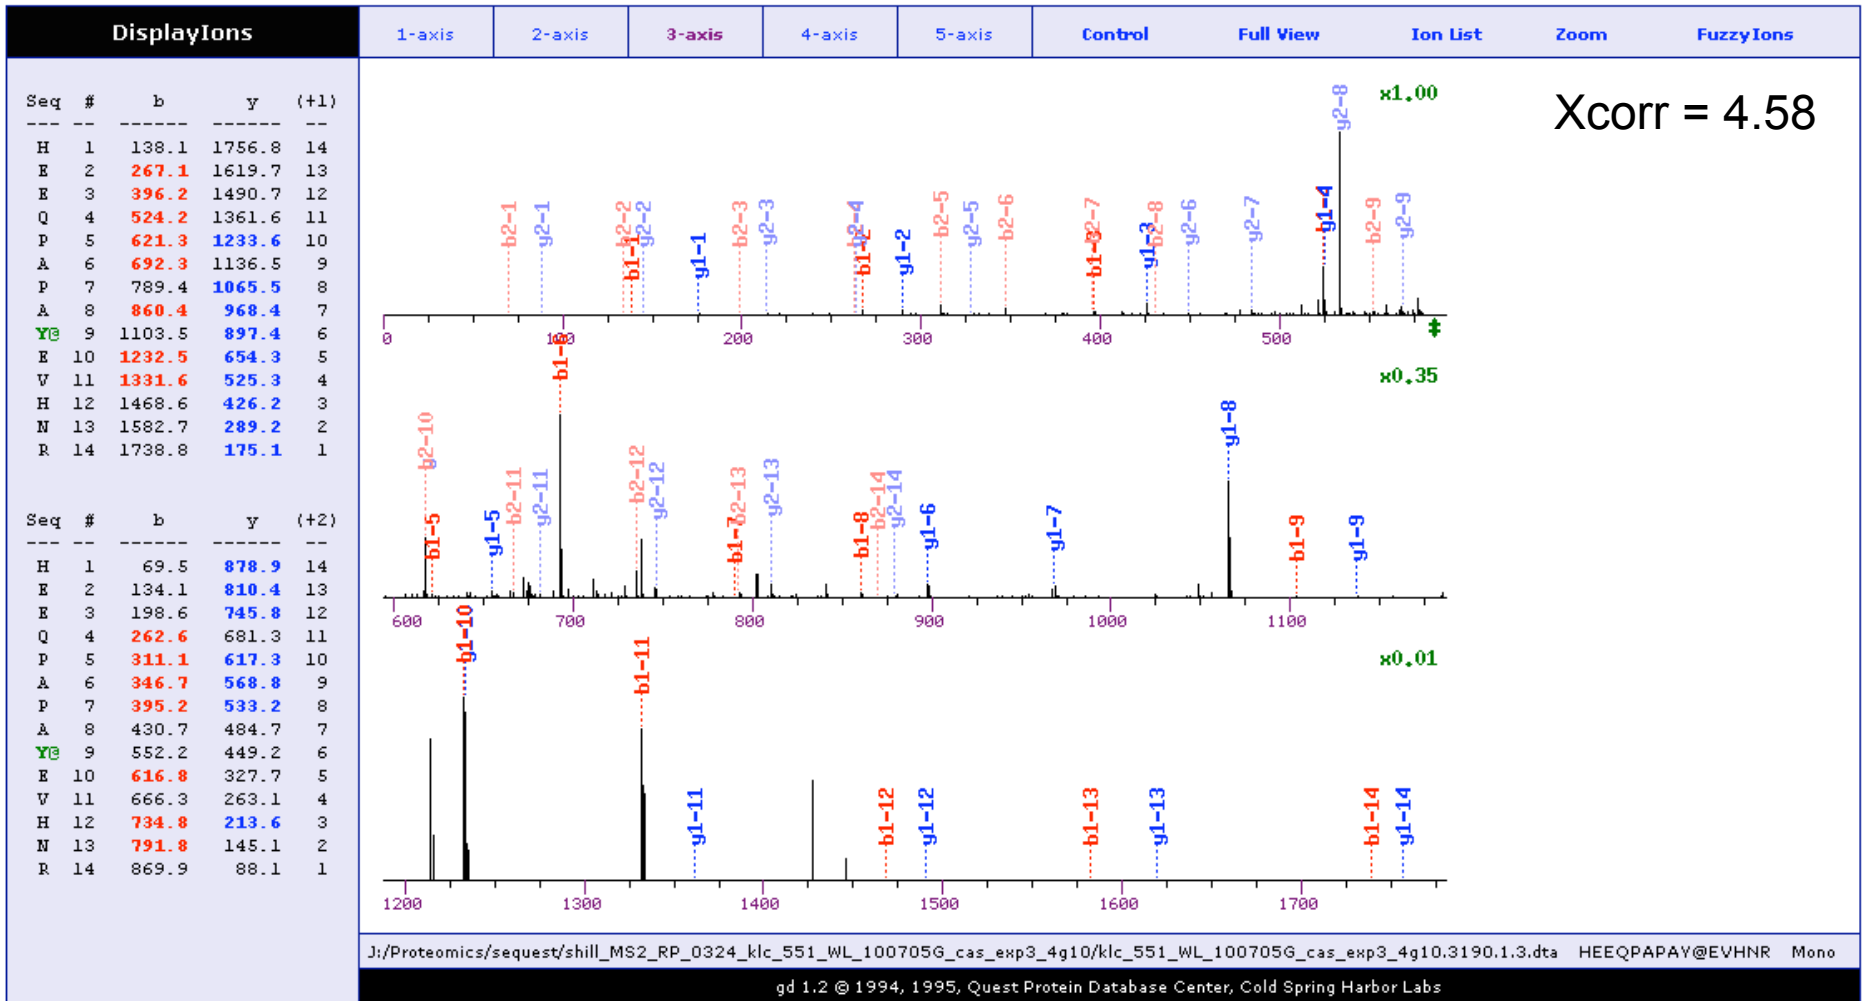

ZO-1 pY1164

L.RHEEQPAPAY@EVHNR.Y.R

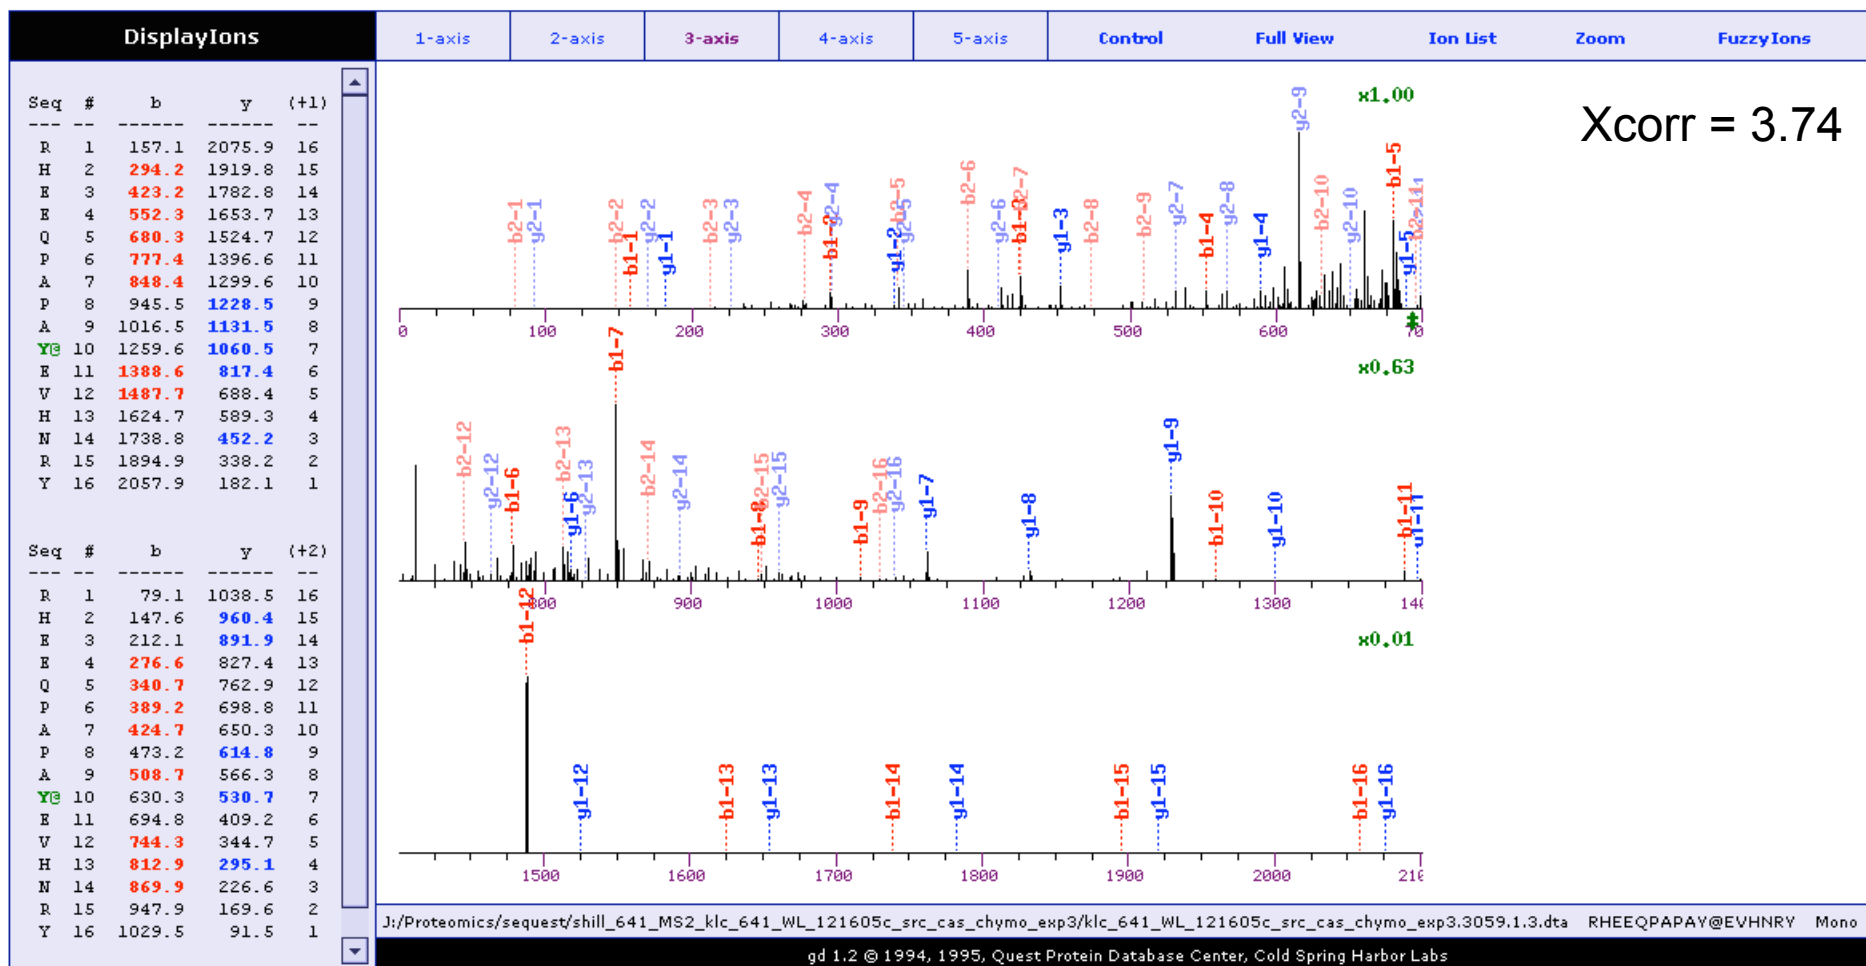

# Cofilin-1 pY139 K.HELQANC\*Y@EEVKDR.C

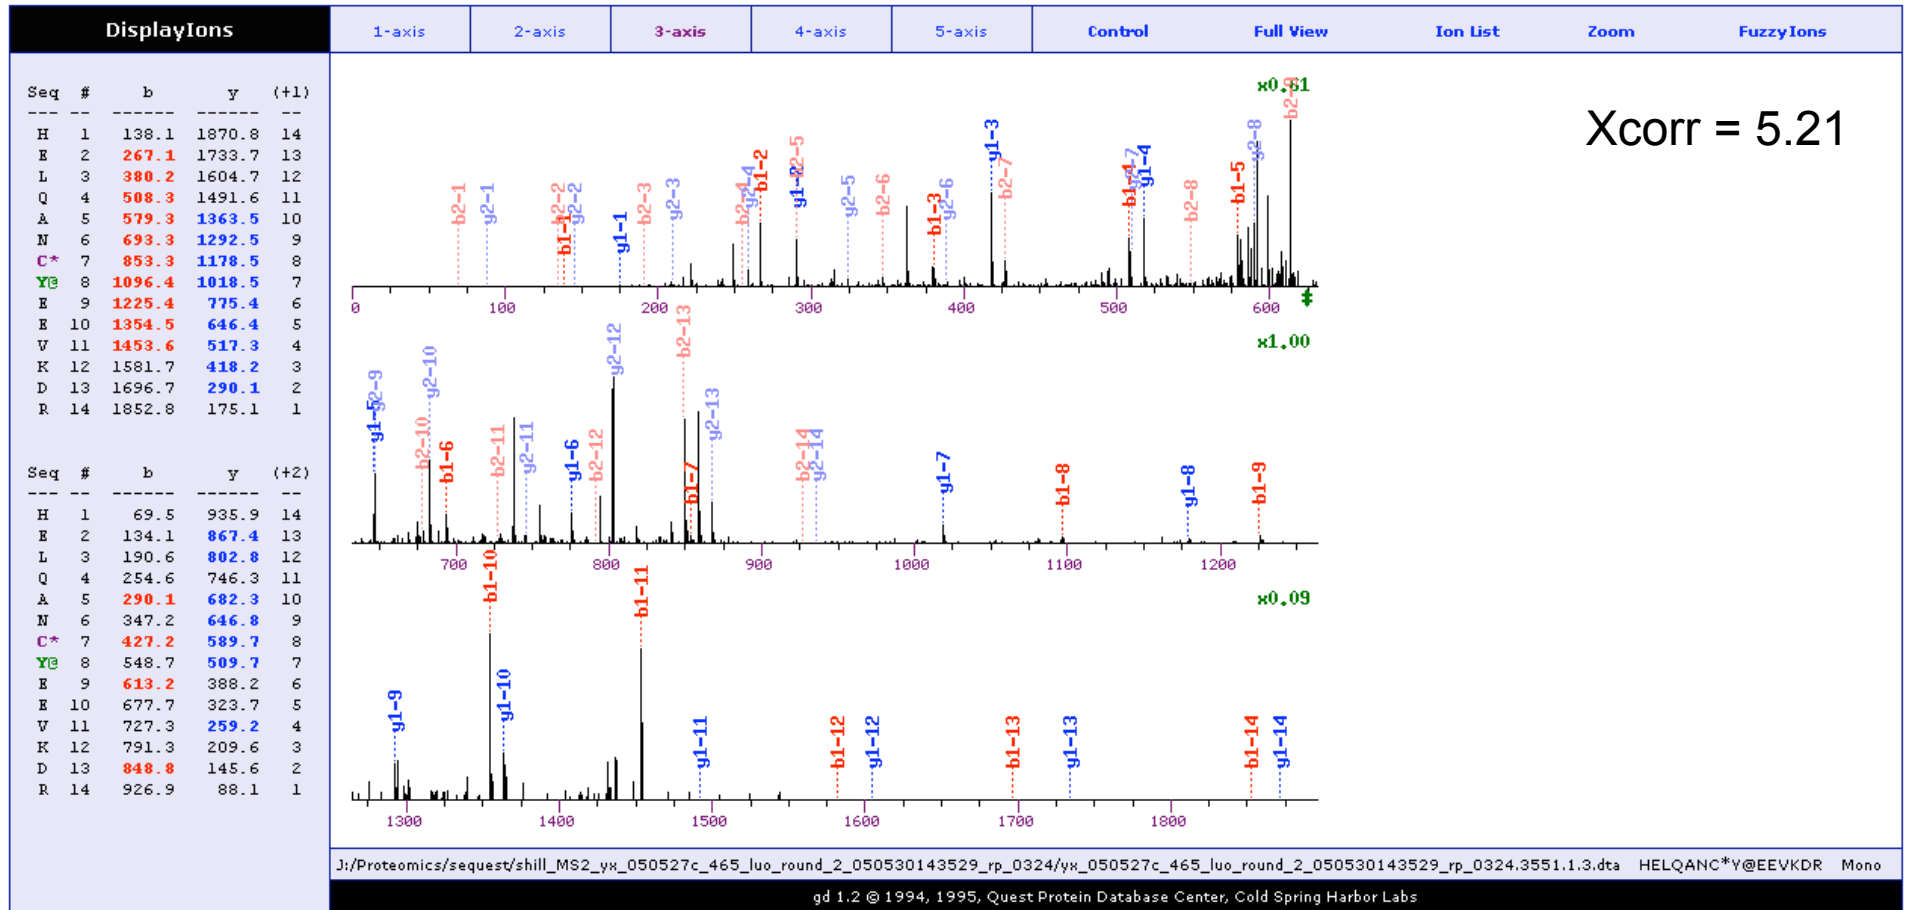

# Cortactin pY466

Y.TSEPVY@ETTEAPGHY.Q

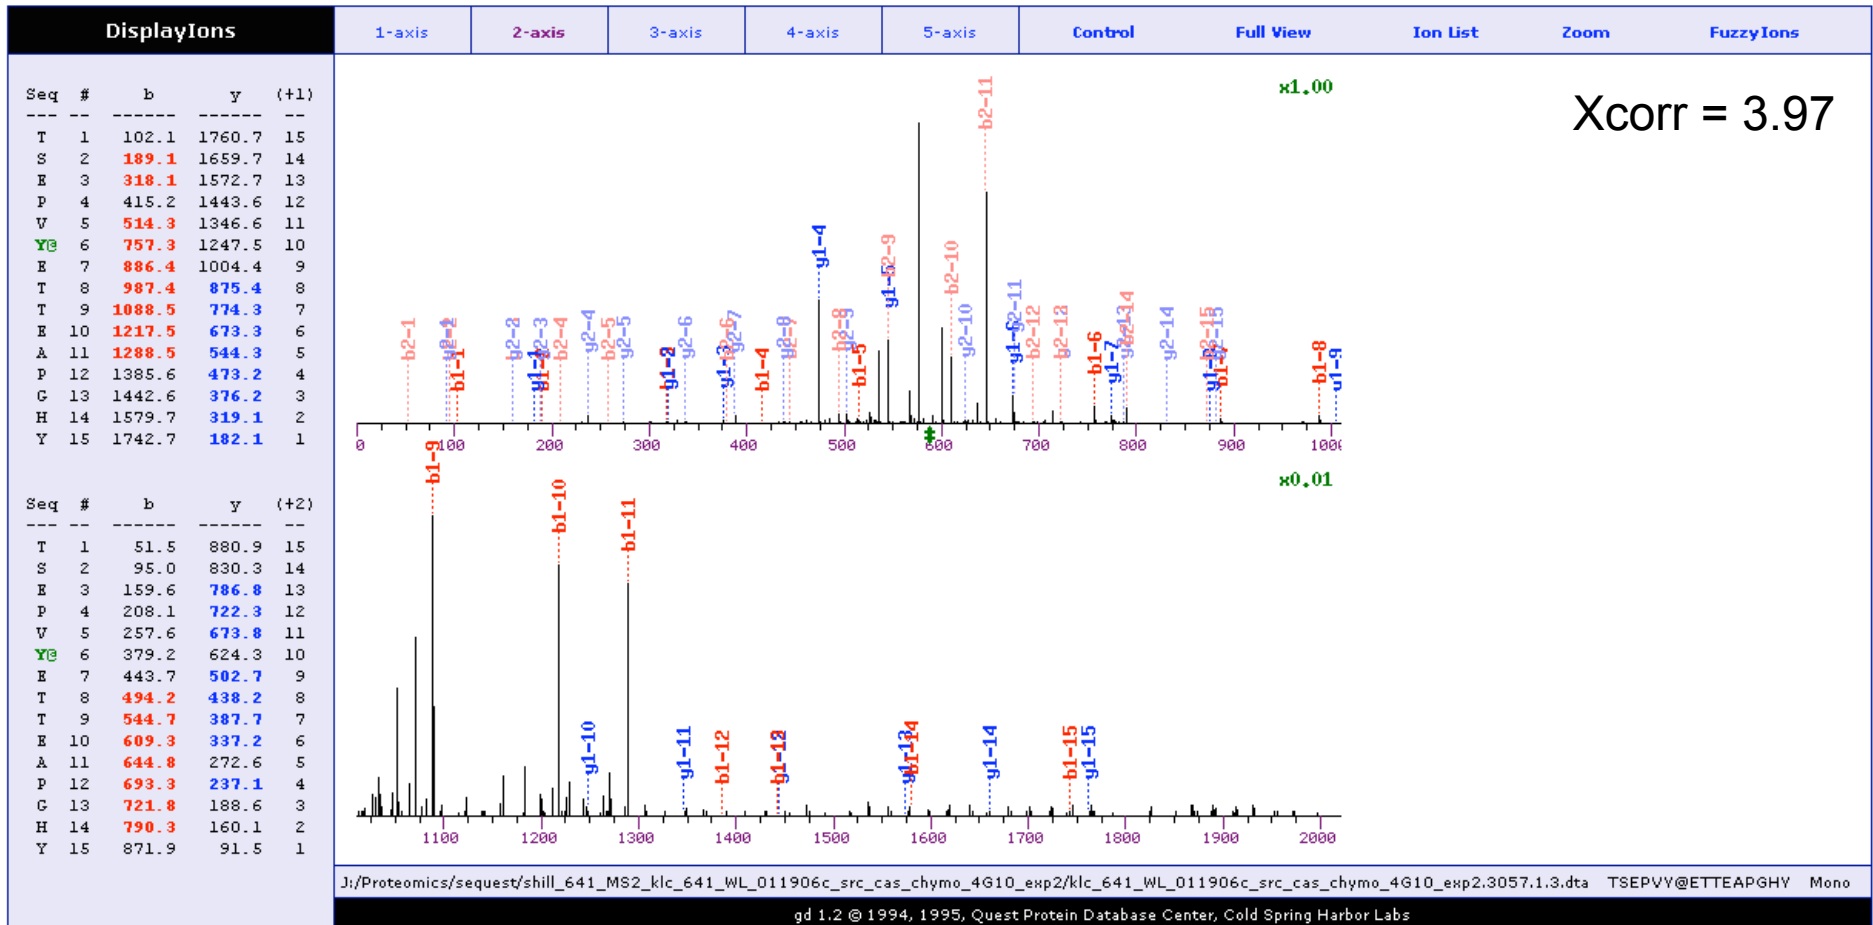

# Cortactin pY466

Y.TSEPVIY@ETTEAPGHY.Q

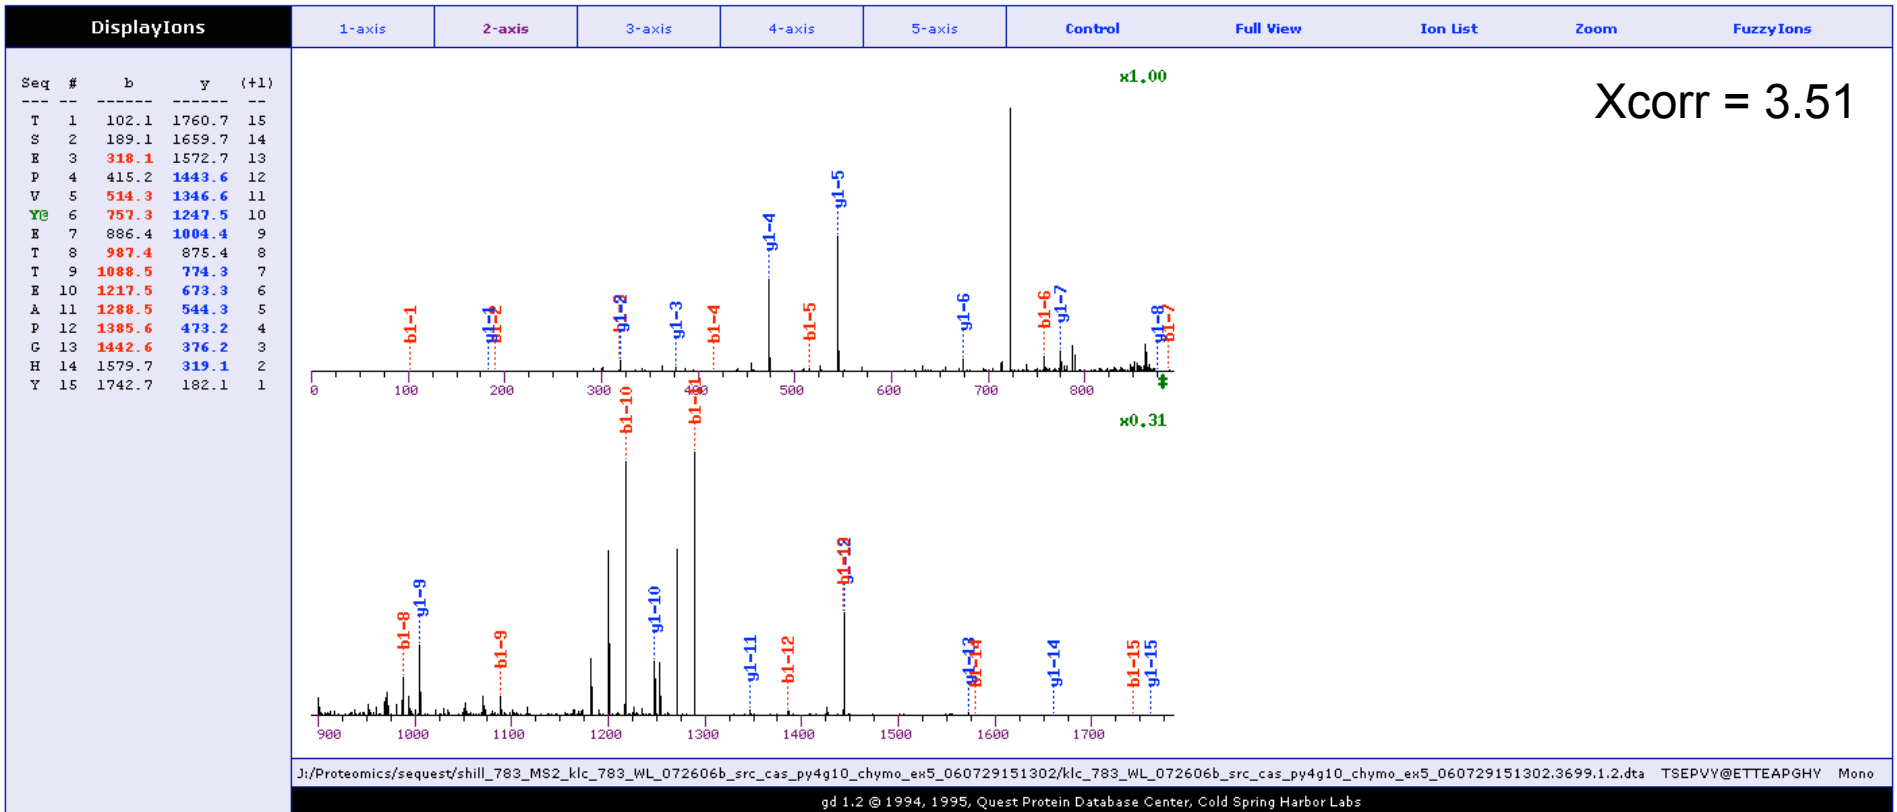

# Cortactin pY466

L.TYTSEPVY@ETTEAPGHY.Q

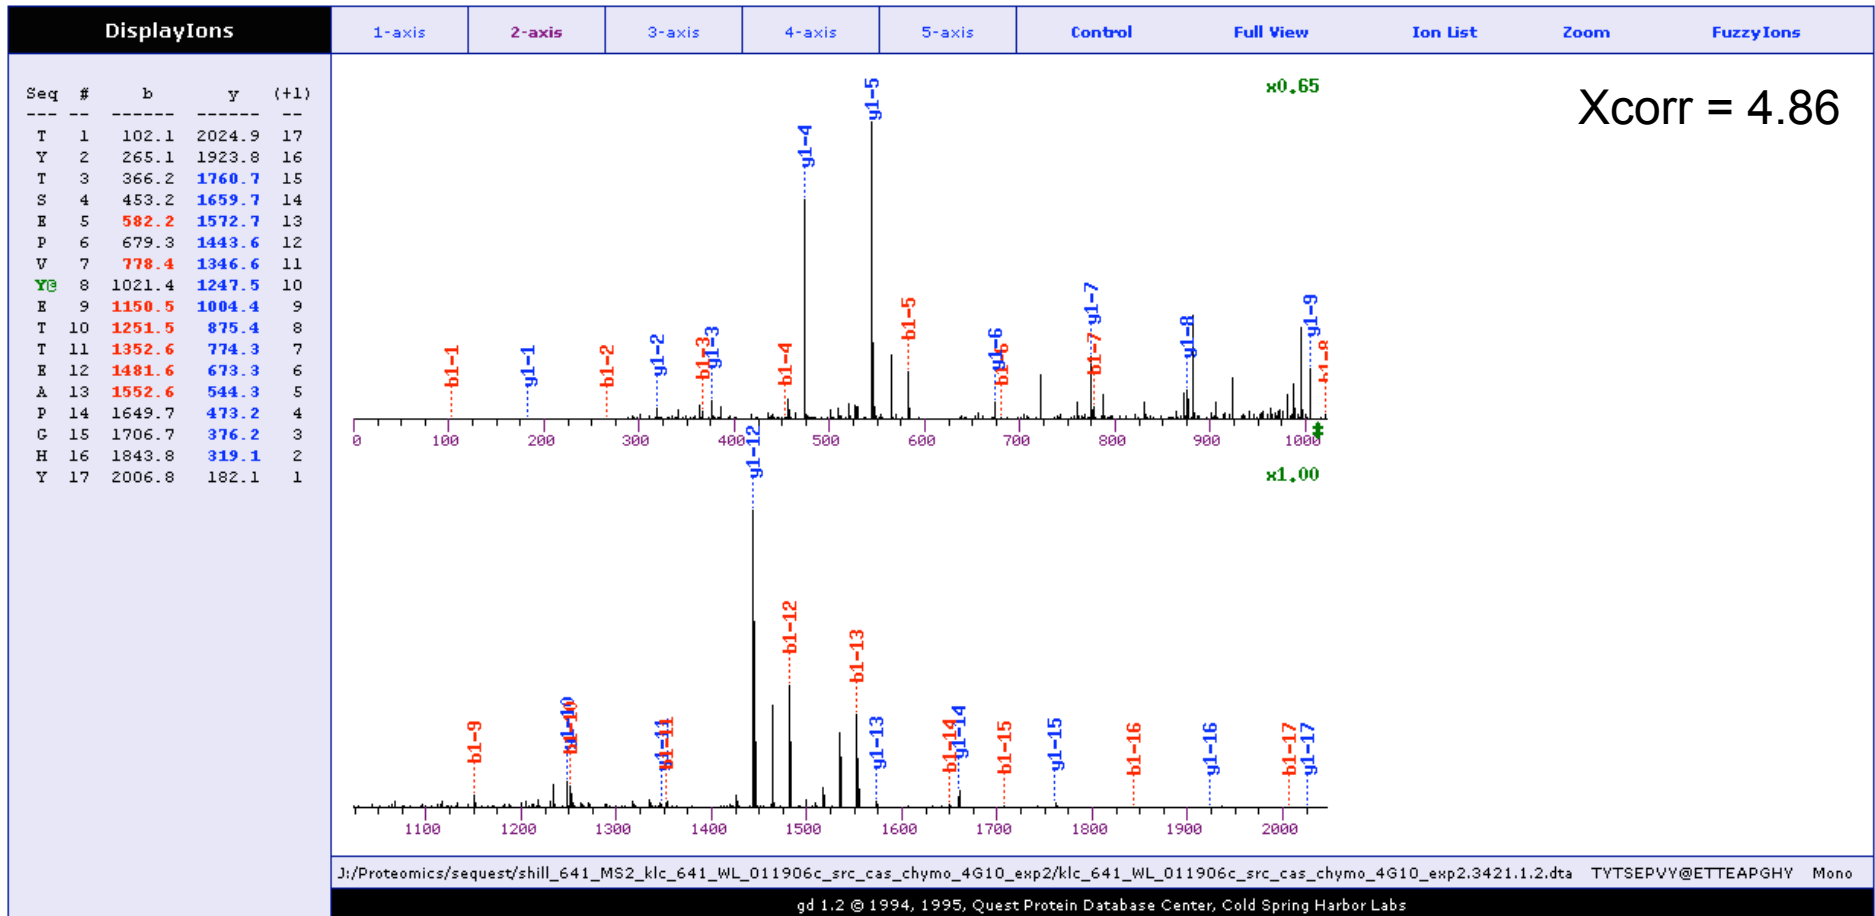

# Cortactin pY466

L.TYTSEPVY@ETTEAPGHY.Q

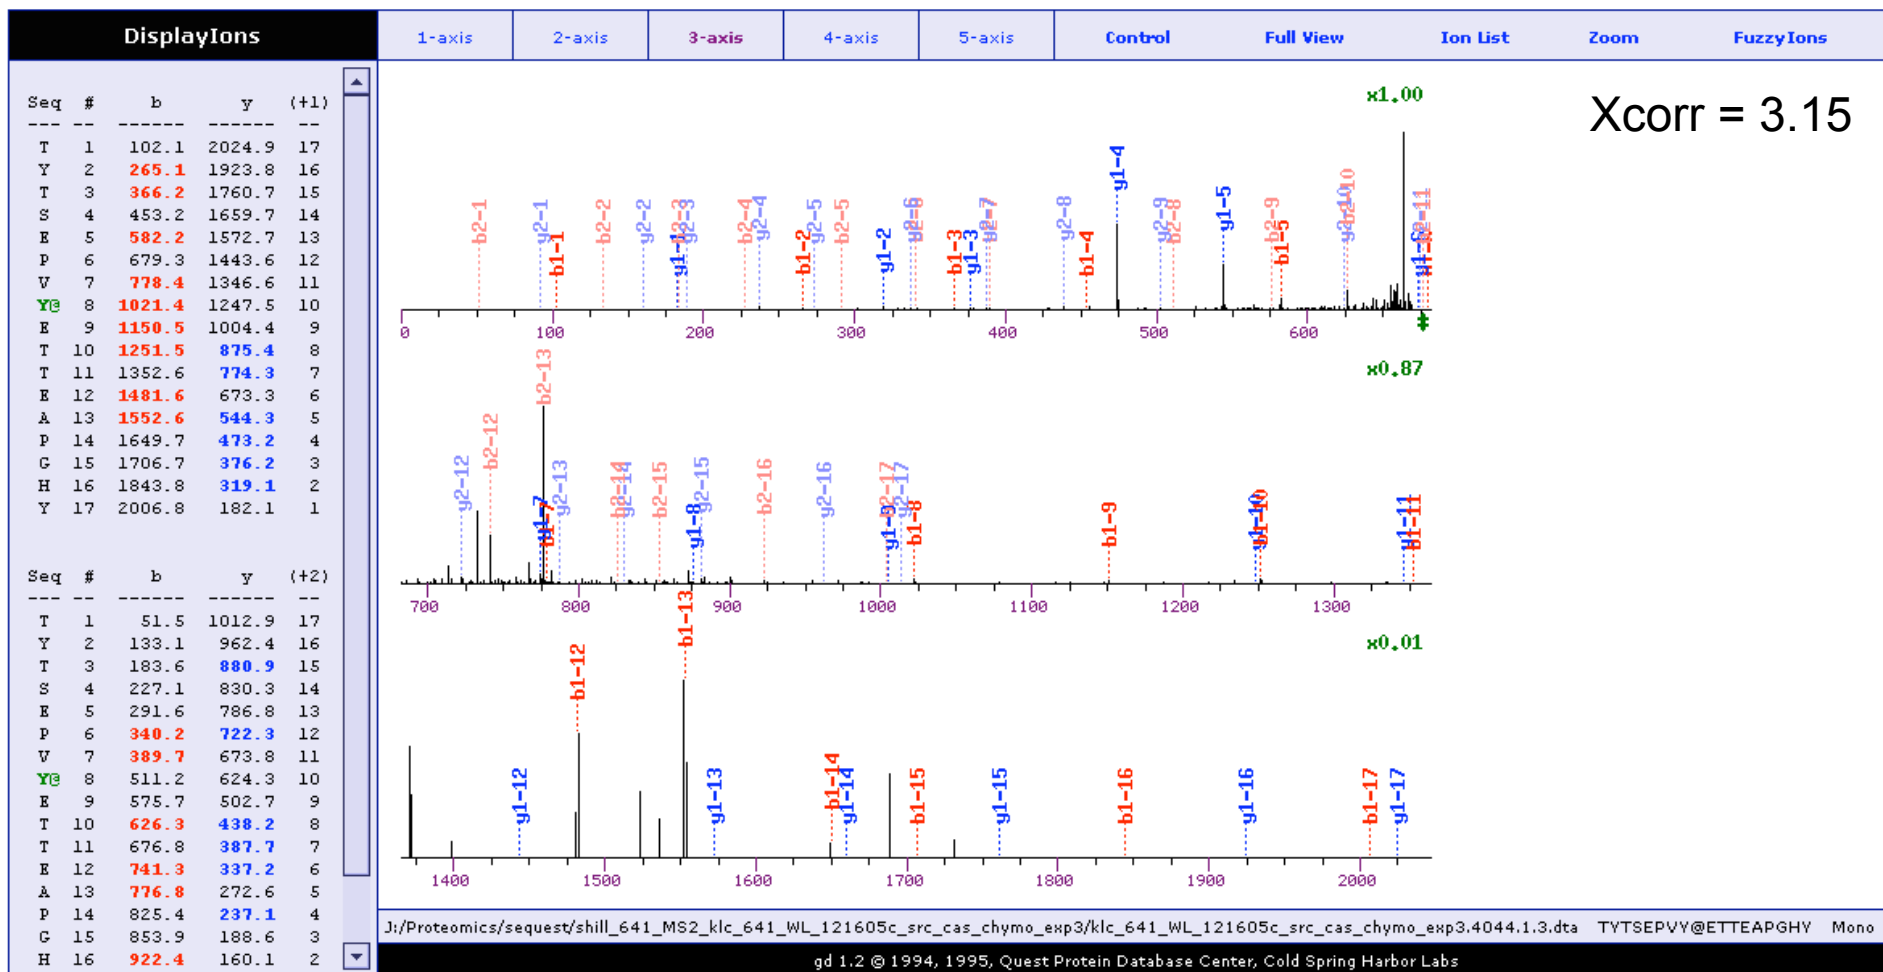



# Septin-2 pY17

K.QQPTQFINPETPGY@VGFANLPNQVHR.K

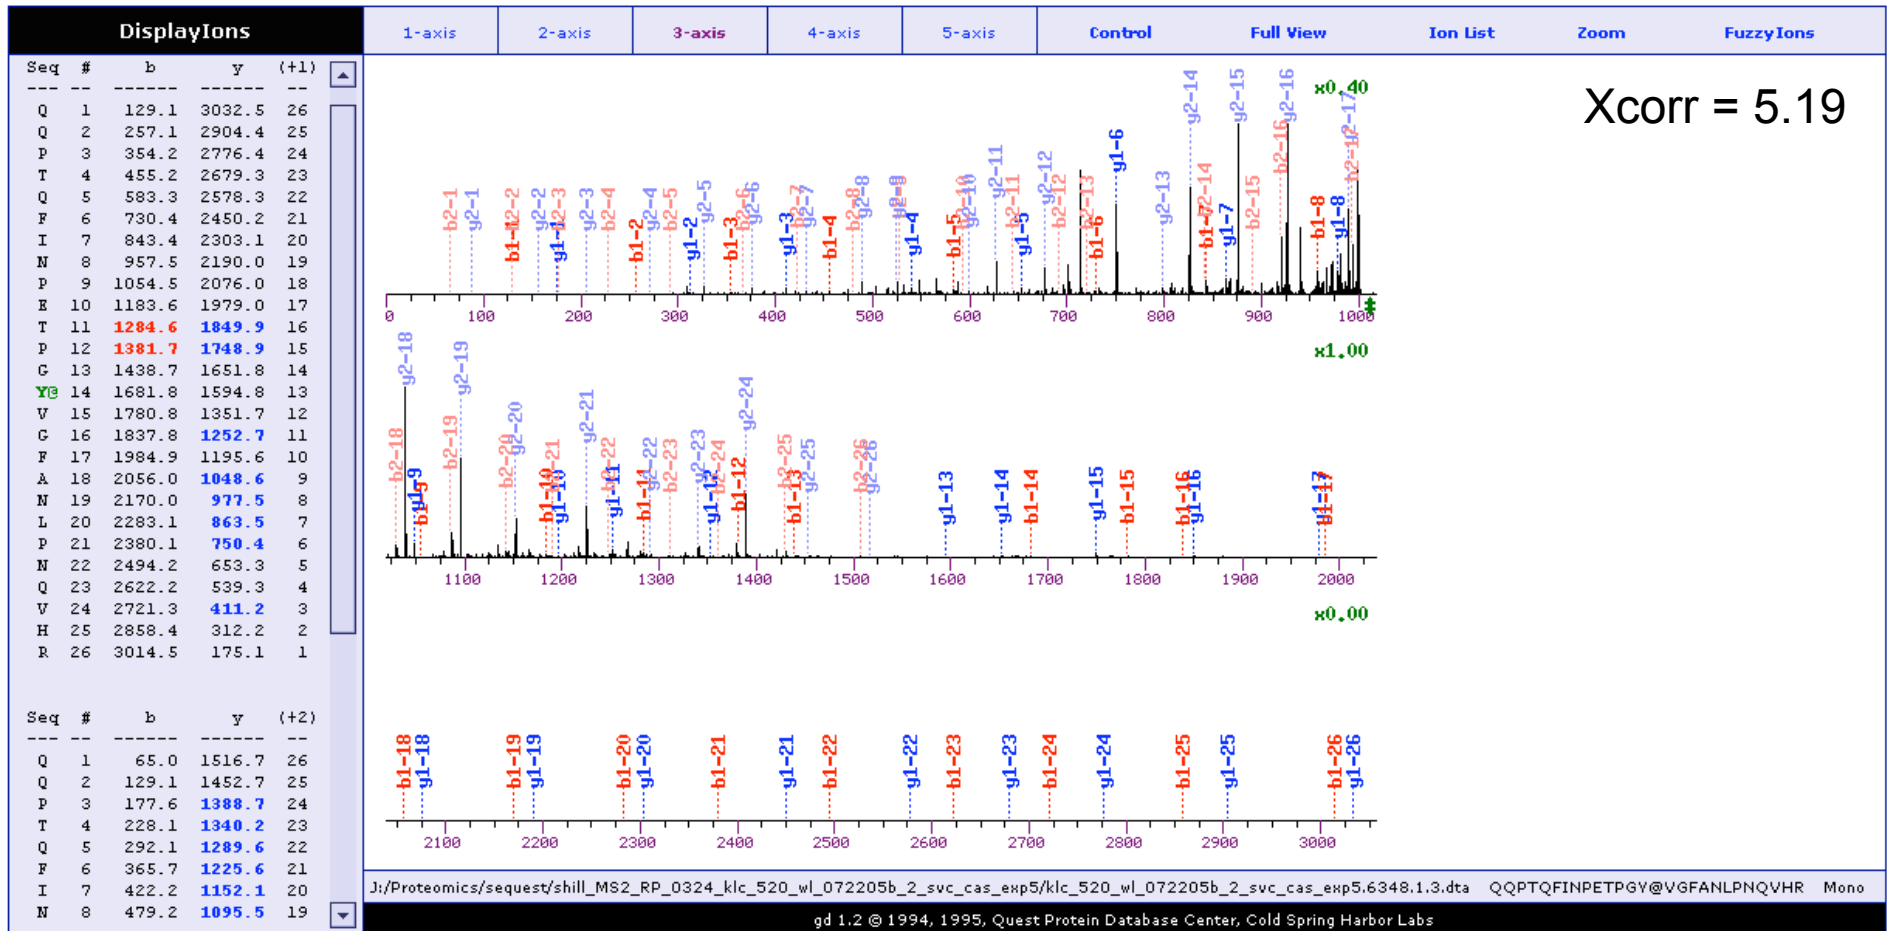

# Septin-2 pY17

K.QQPTQFINPETPGY@VGFANLPNQVHRK.S

Xcorr 2.82

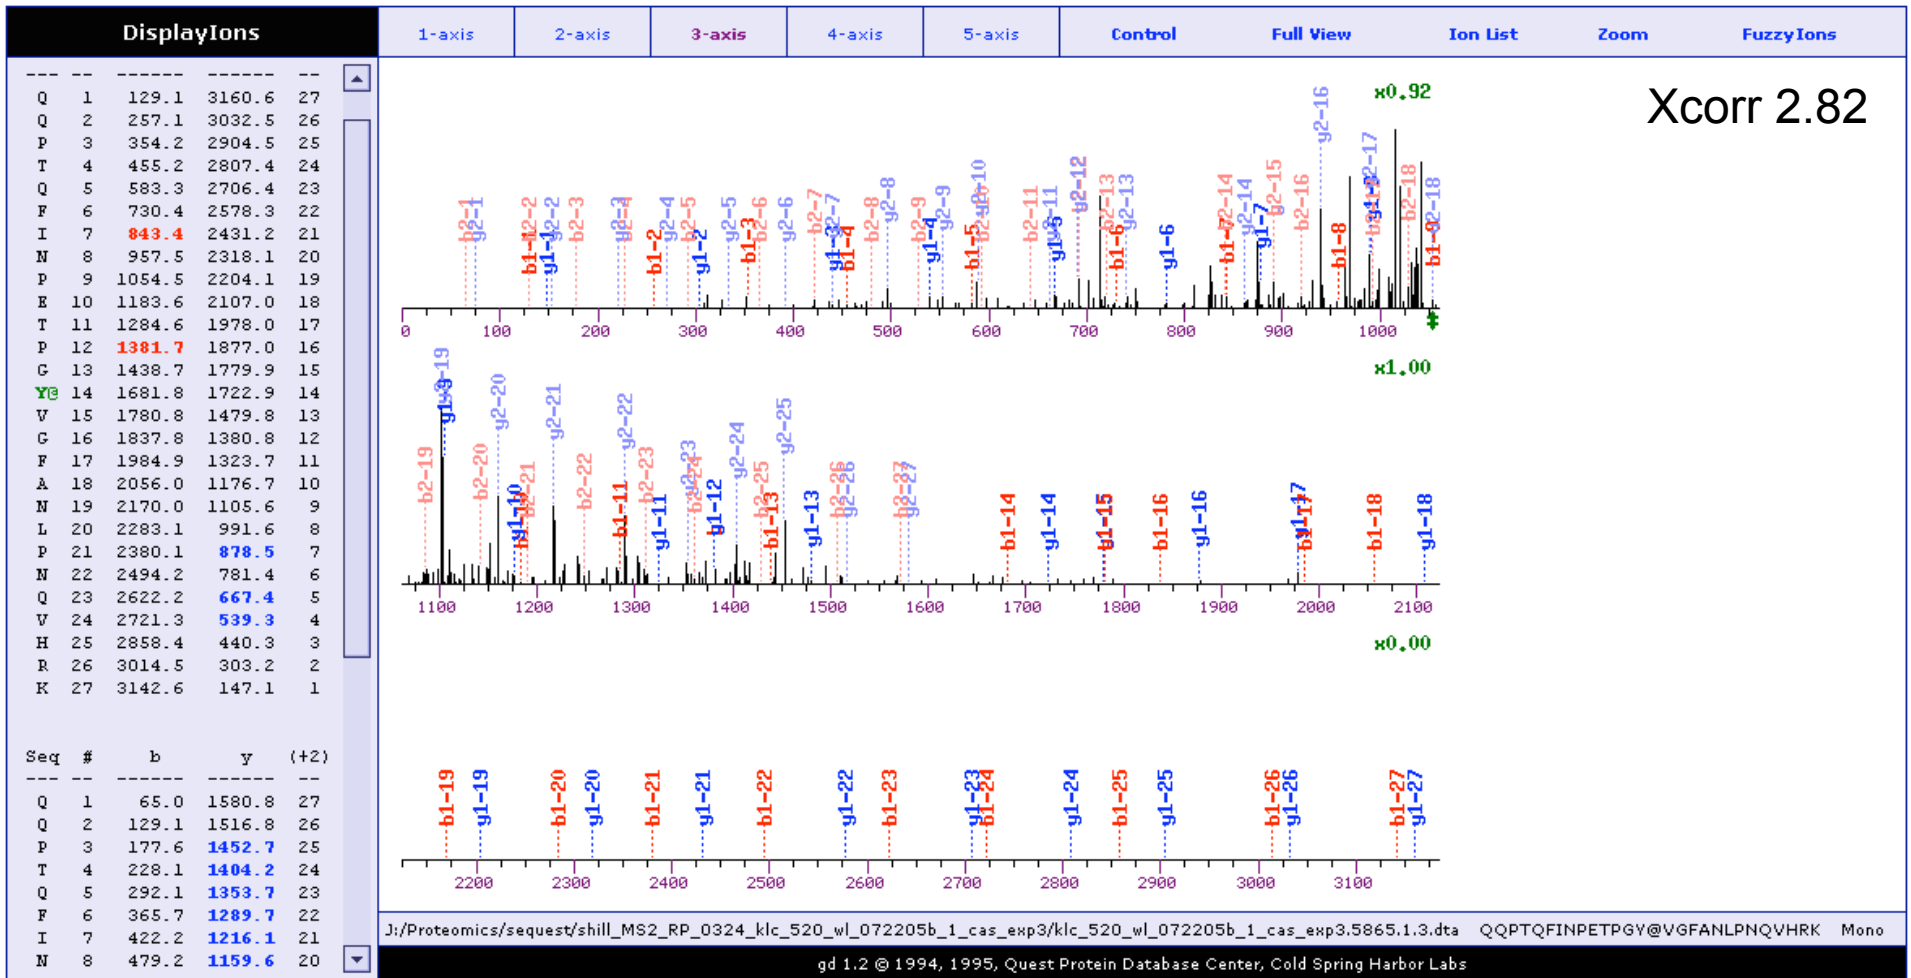

# VASP pY39 R.VQIY@HNPTANSFR.V

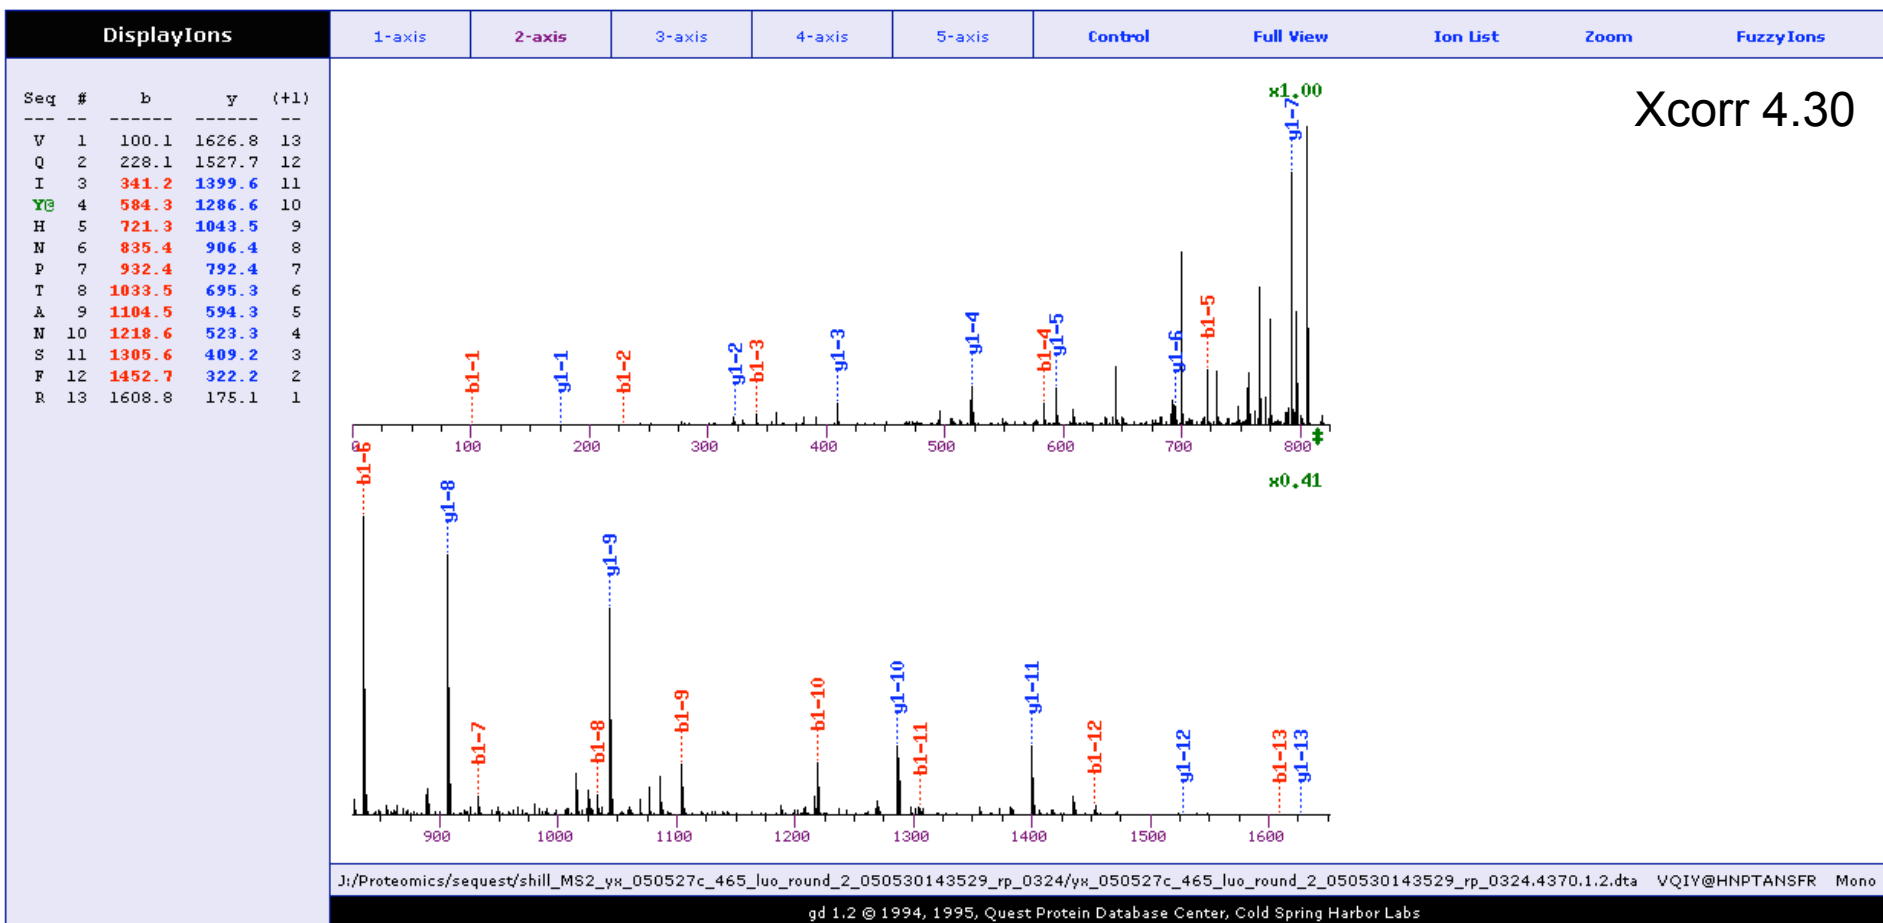

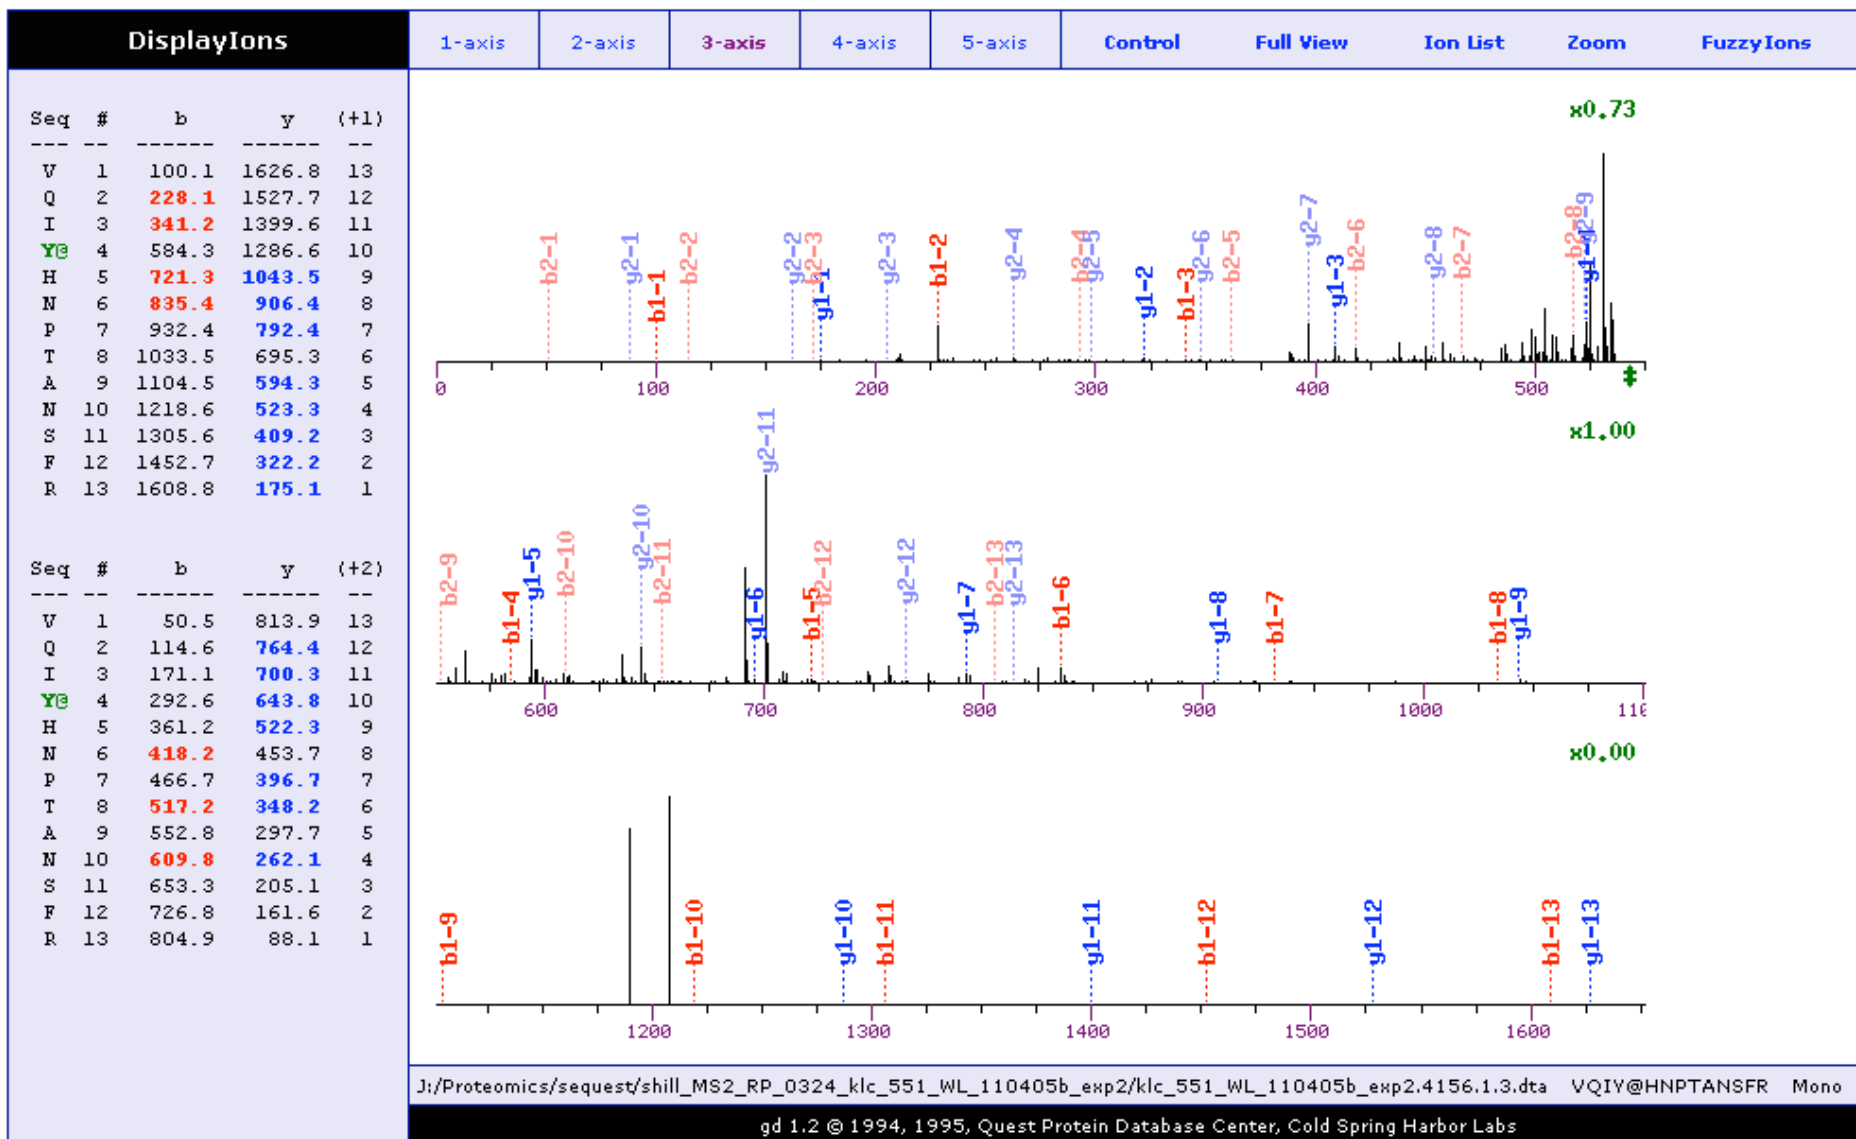

VASP pY39

F.SRVQIY@HNPTANSF.R

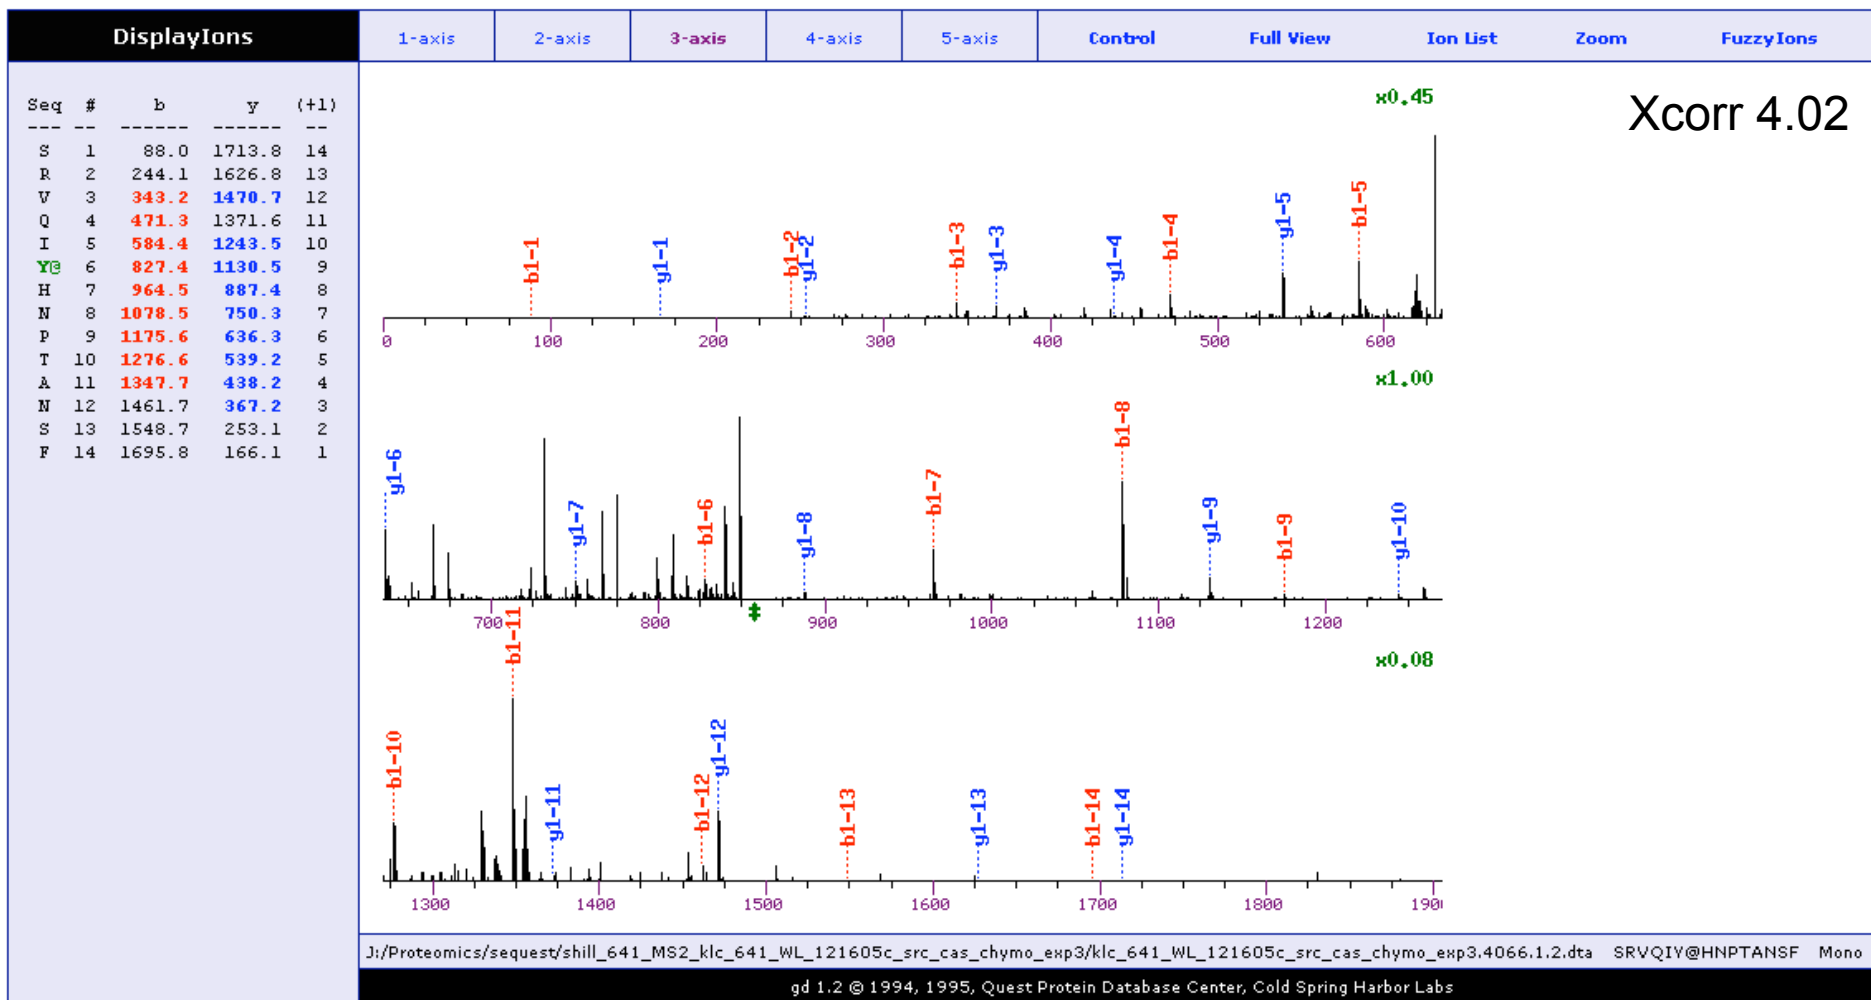

# Enolase alpha pY43 R.AAVPSGASTGIY@EALELR.D

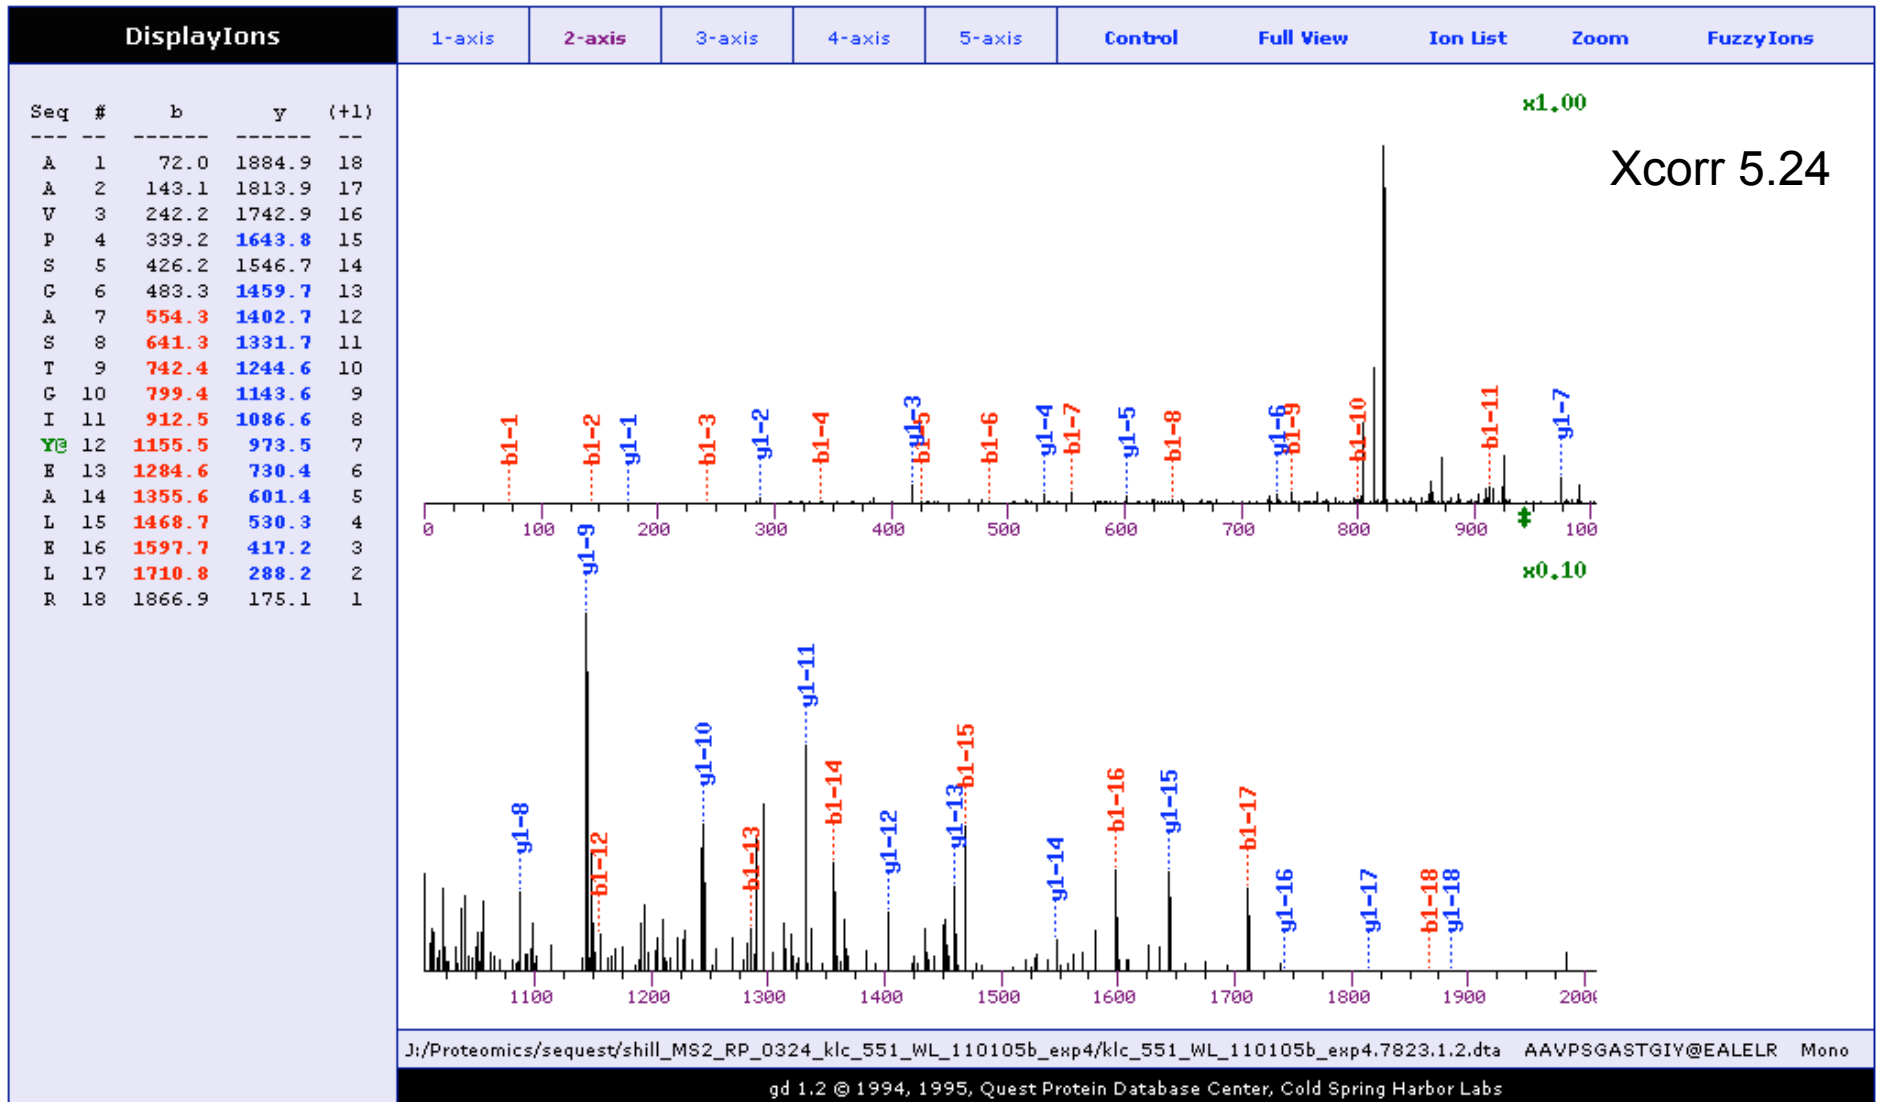

# Enolase alpha pY43 R.AAVPSGASTGIY@EALELR.D

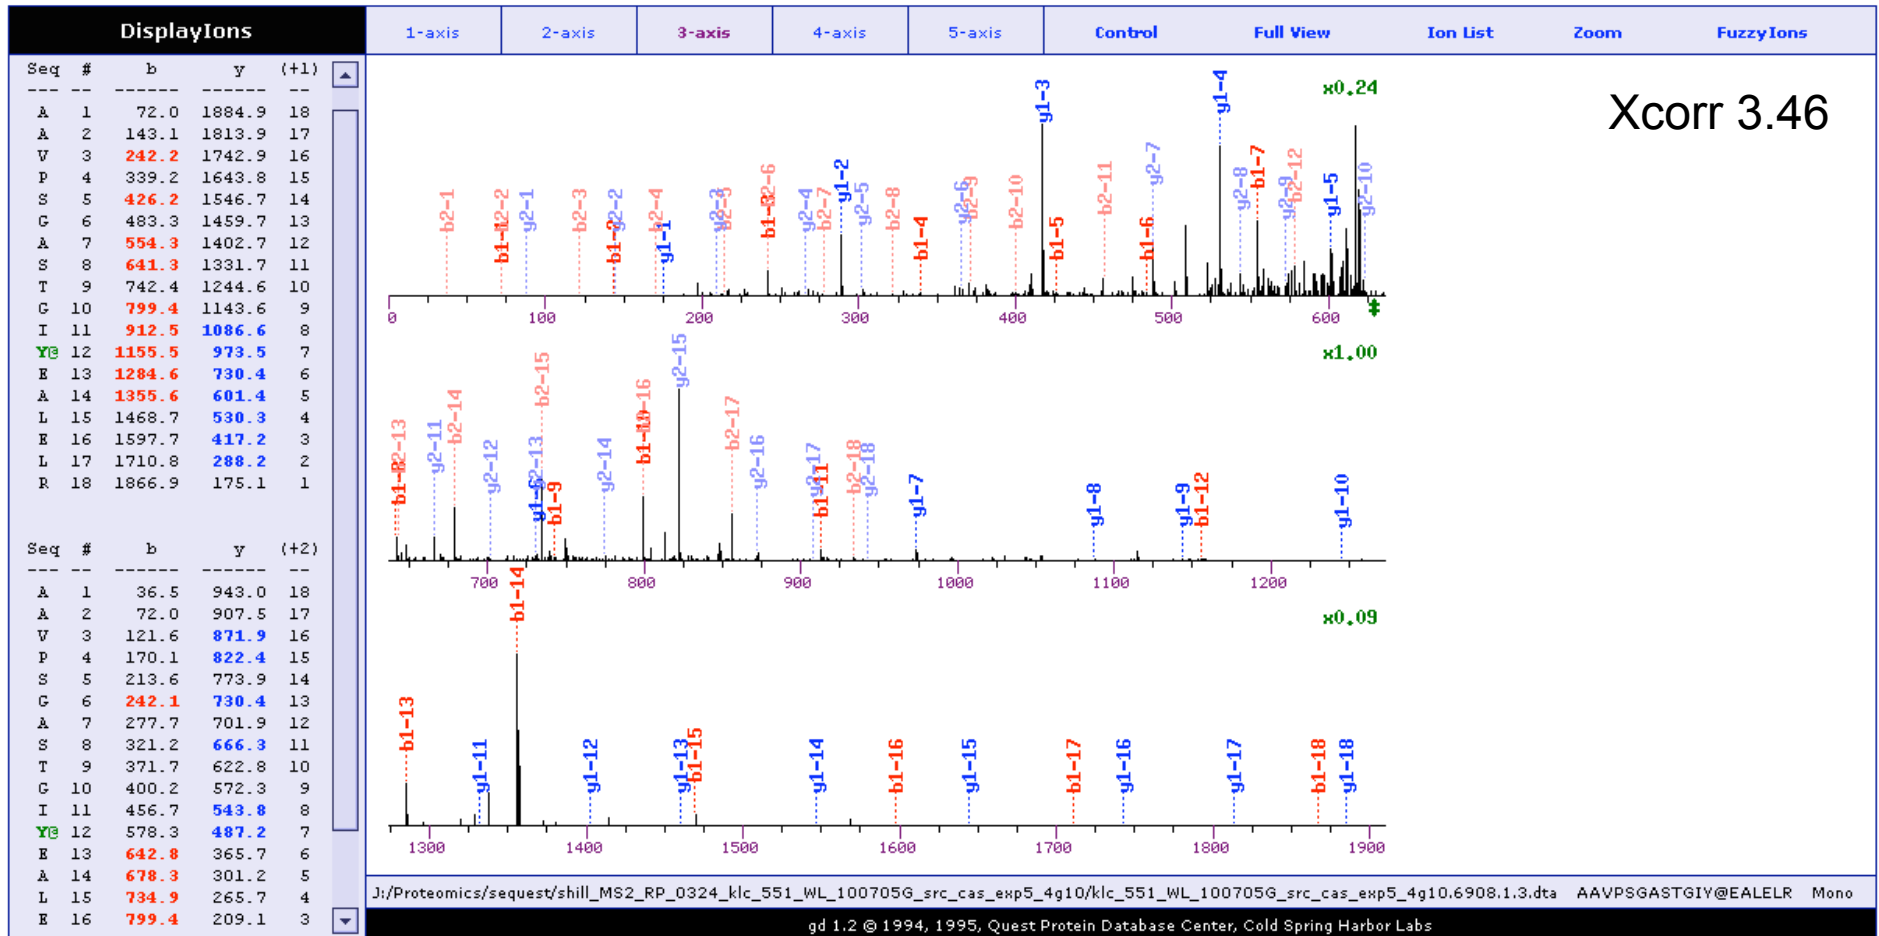

# Enolase alpha pY43 F.RAAVPSGASTGIY@EALEL.R

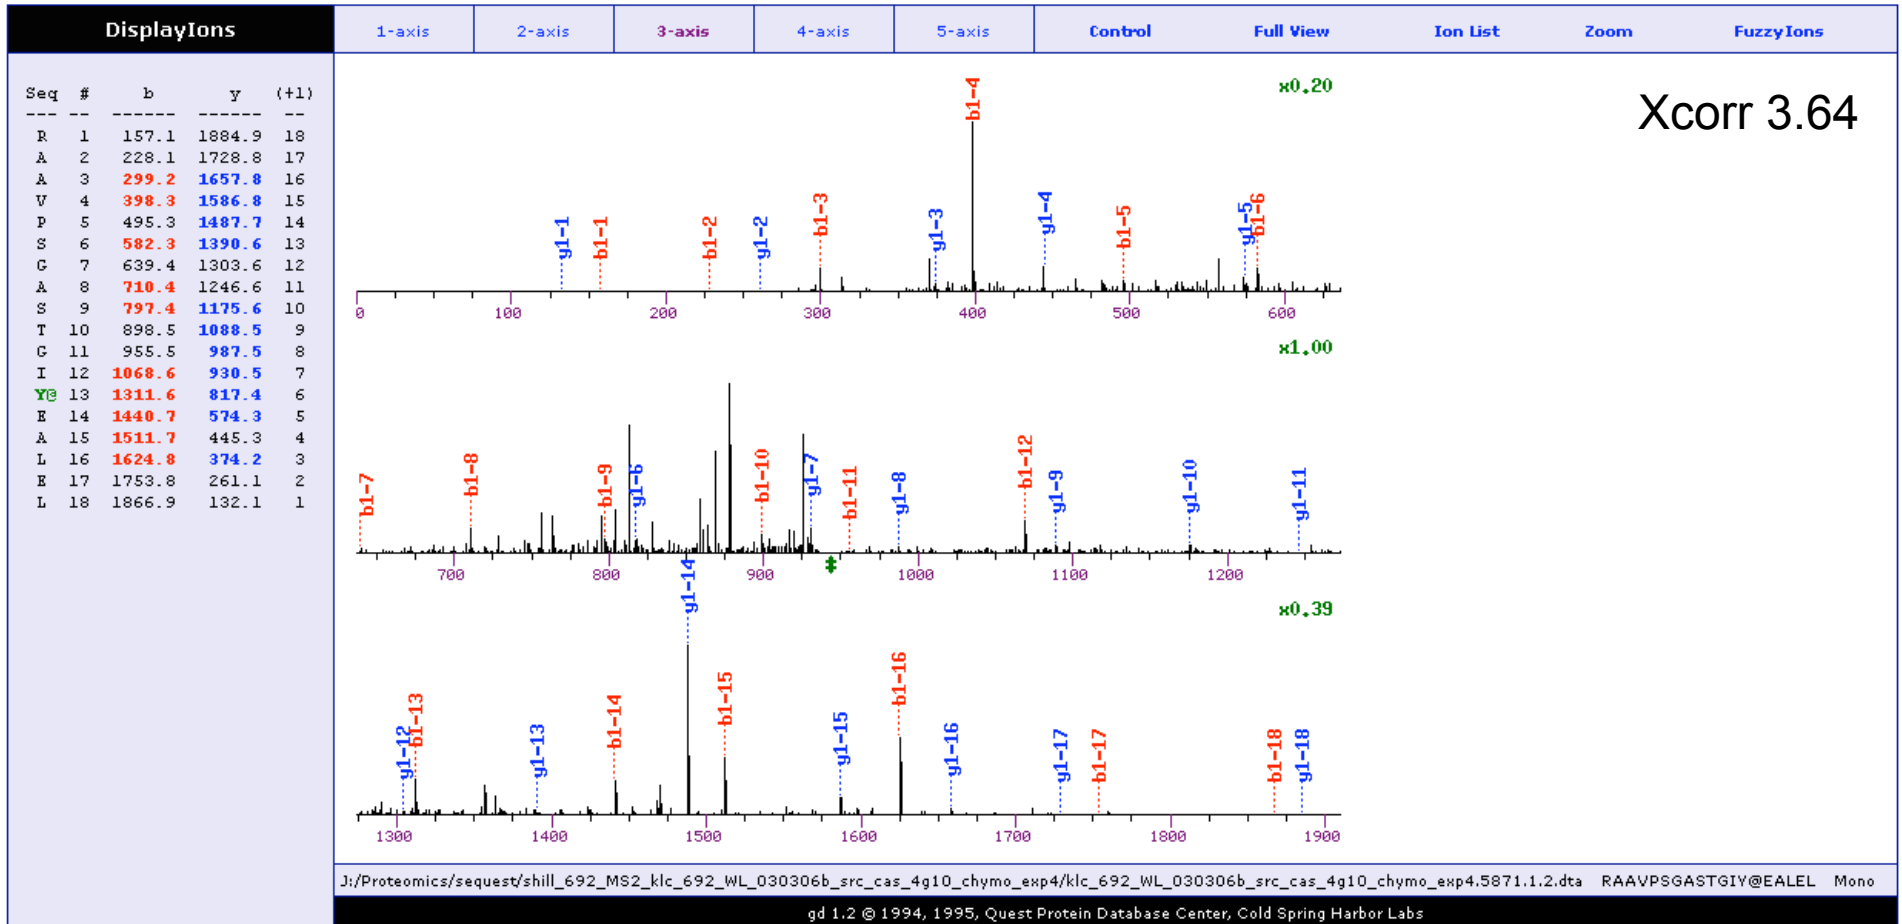



# Enolase alpha pY43 F.RAAVPSGASTGIY@EAL.E

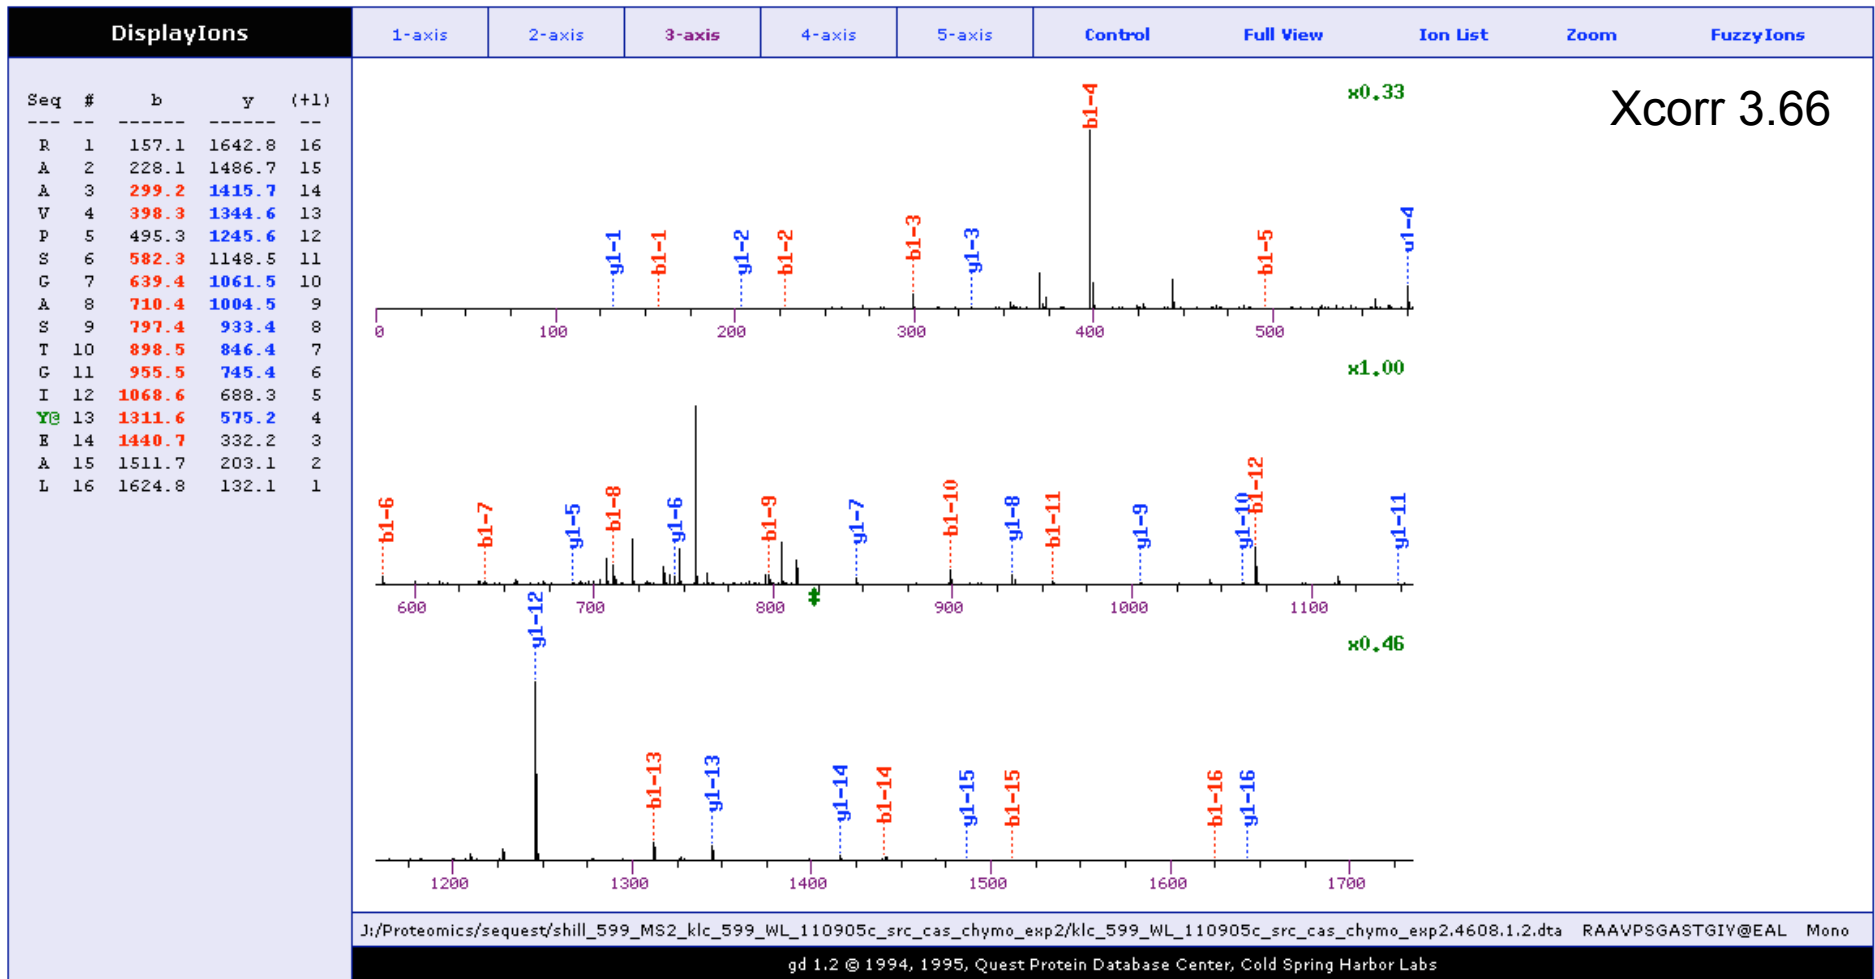

GAPDH pY315

L.ISWYDNEY@GYSNRVVDL.M

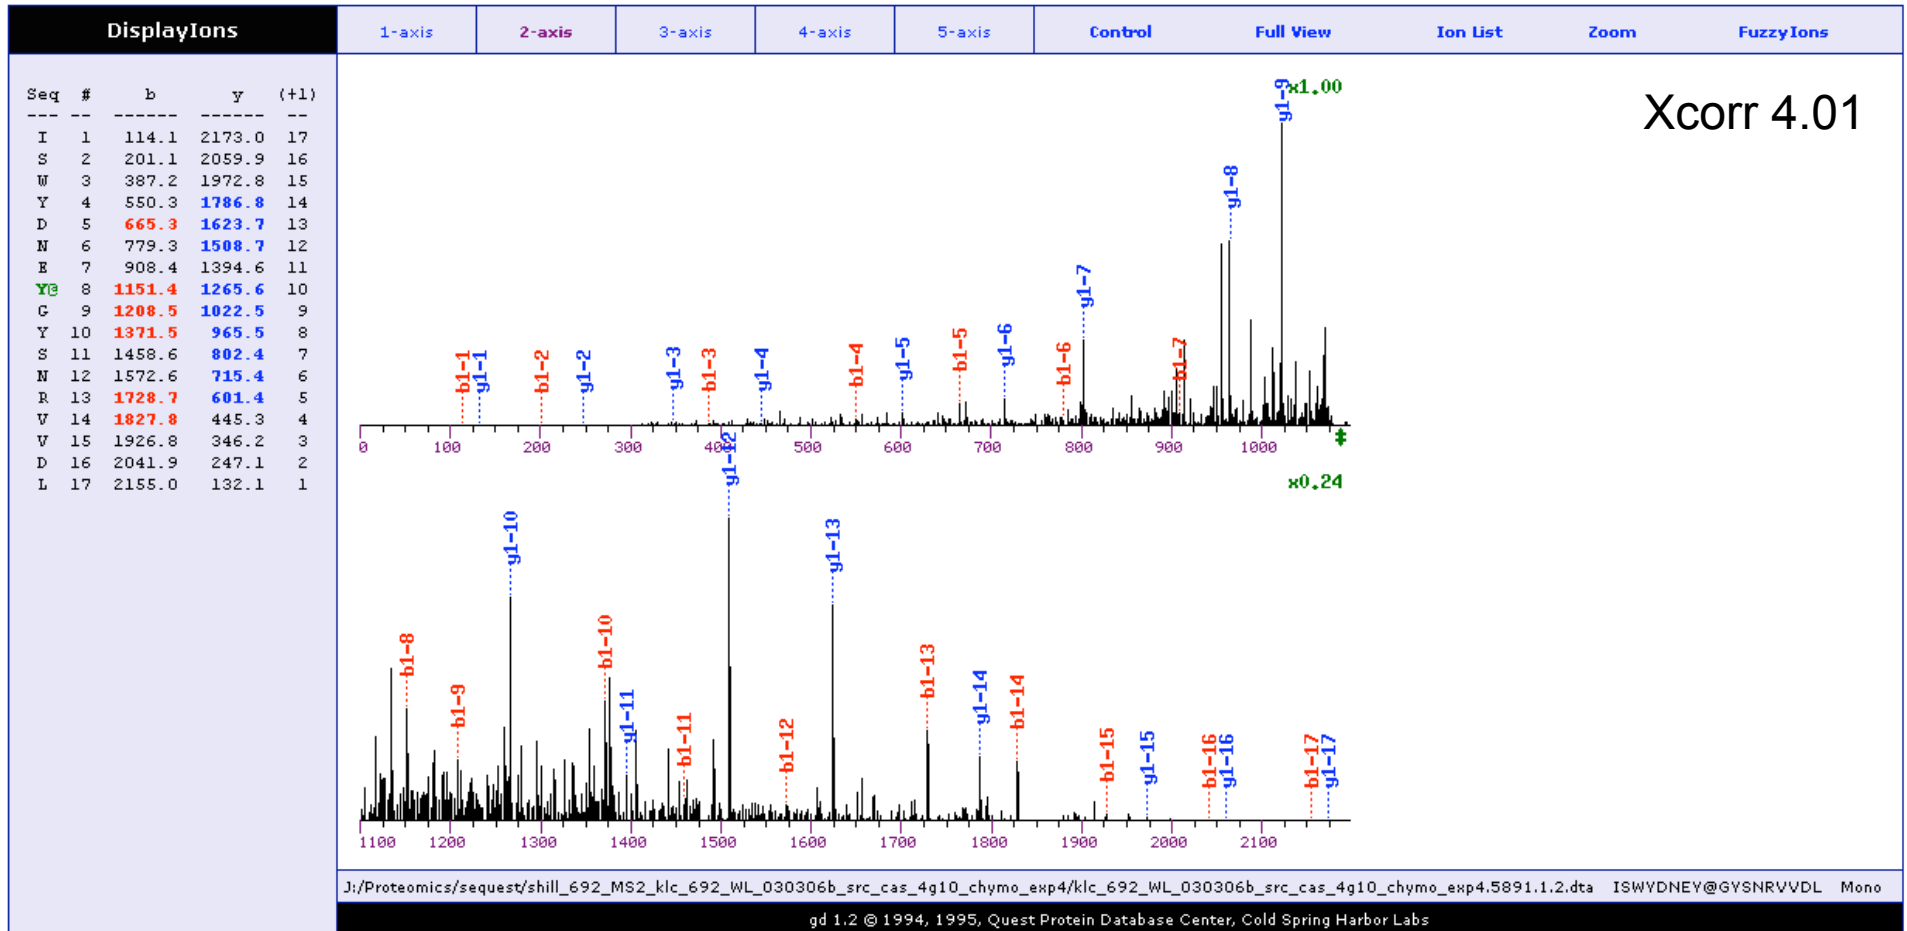

# GAPDH pY315 L.ISWYDNEY@GY.S

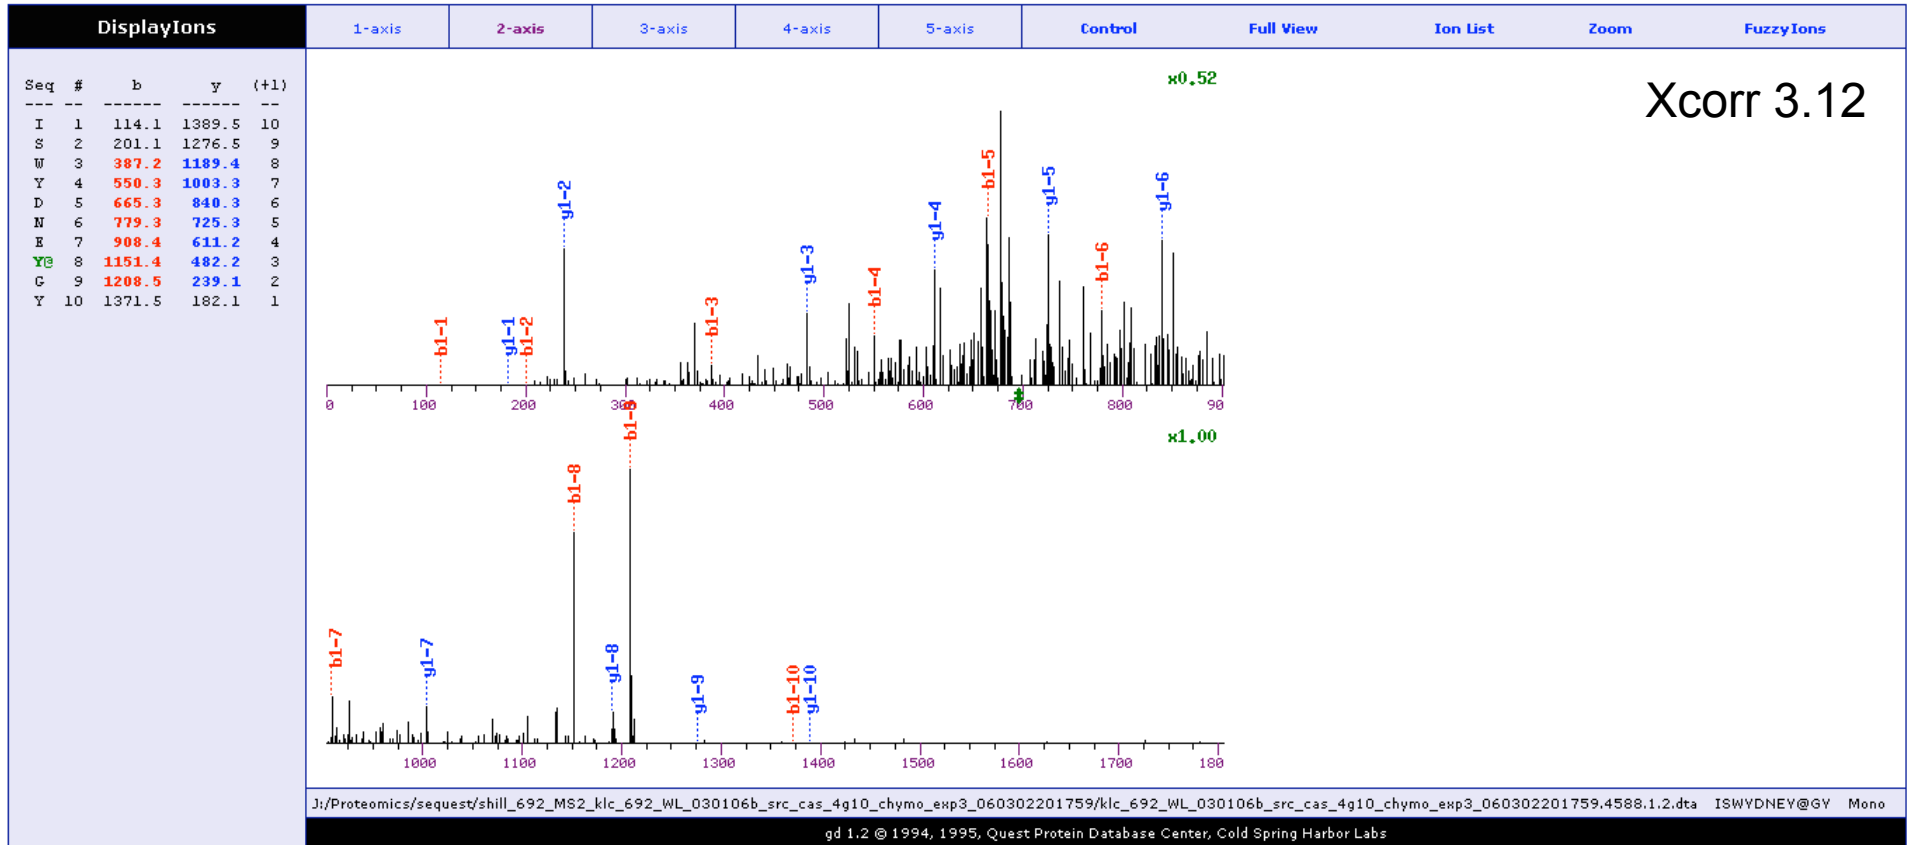

# GAPDH pY315 K.LISWYDNEY@GYSNR.V

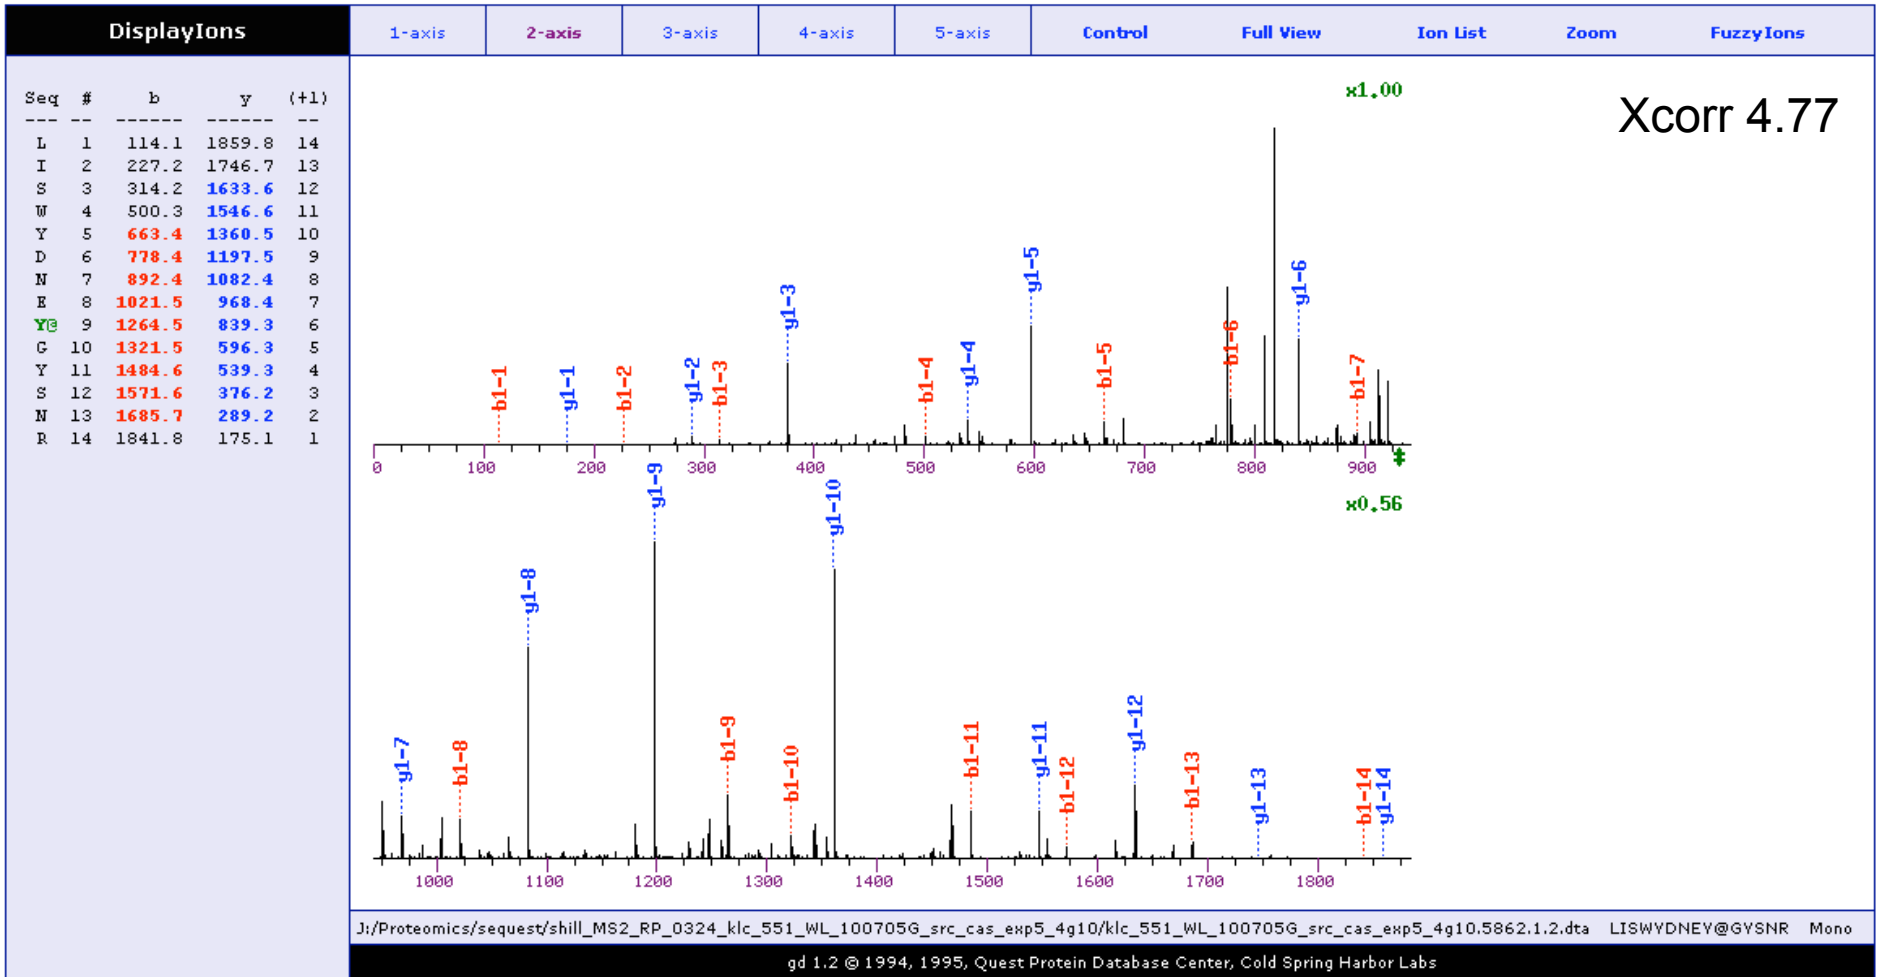

# GAPDH pY315 K.LISWYDNEY@GYSNR.V

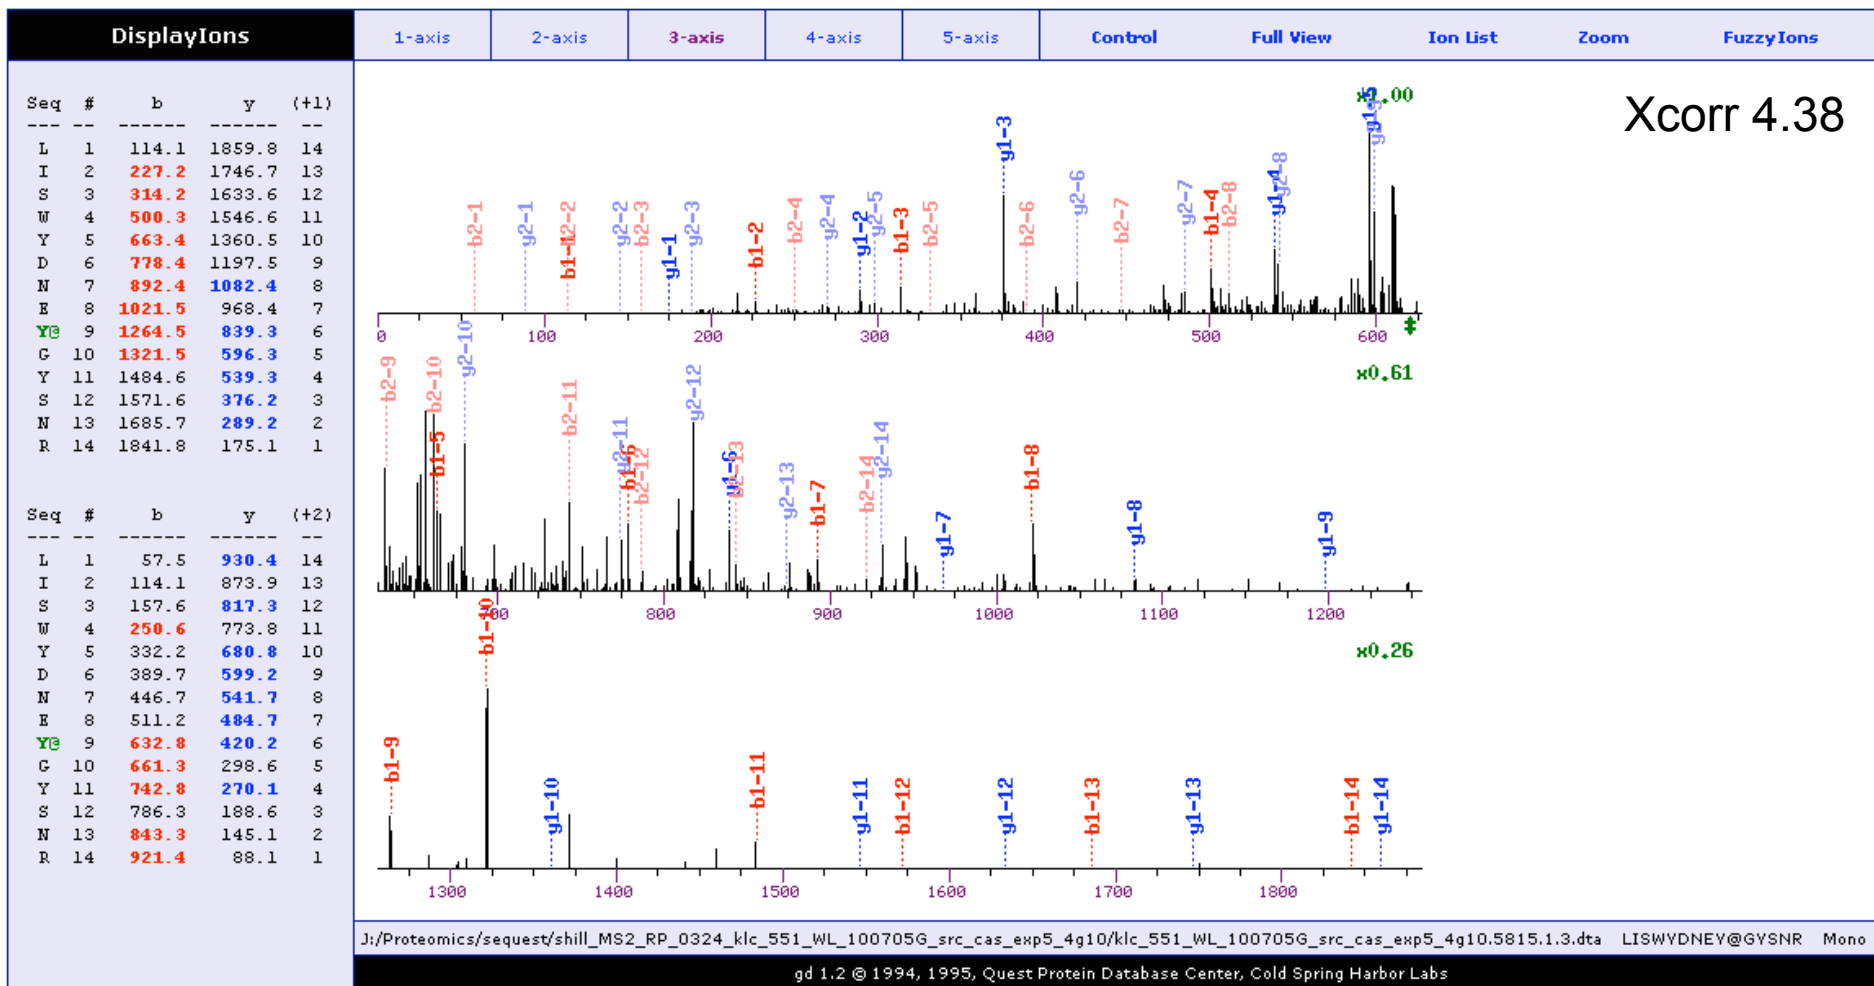

# GAPDH pY315 F.VKLISWYDNEY@GY.S

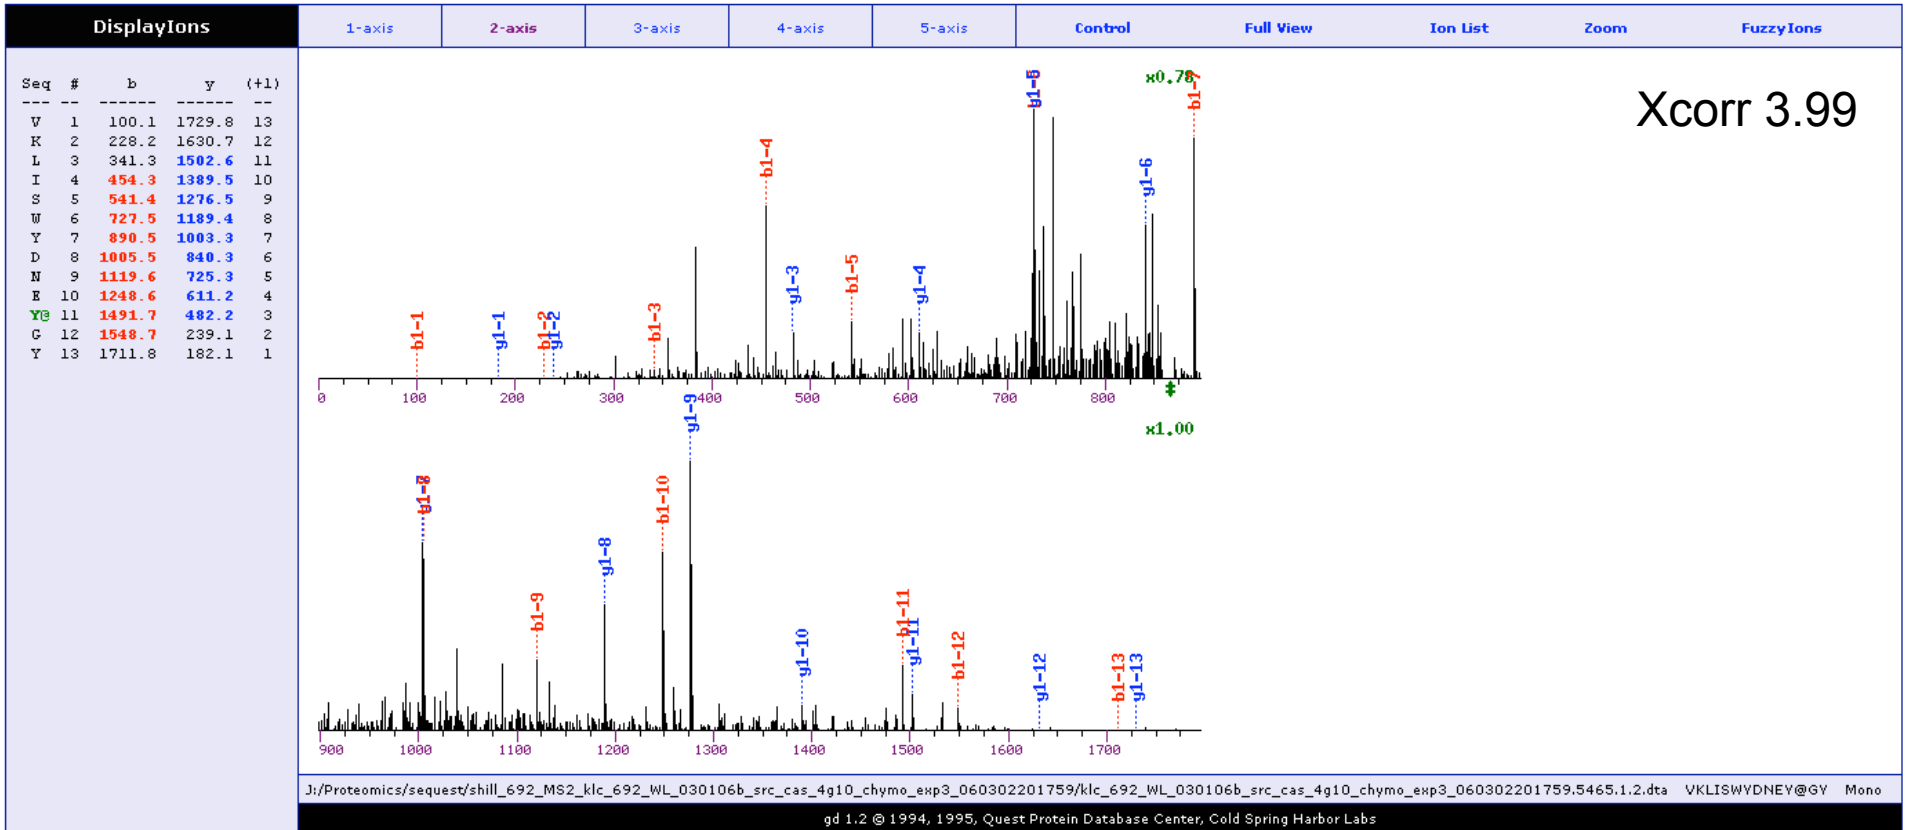

eEF1A-1 pY29 K.STTTGHLIY@K.C

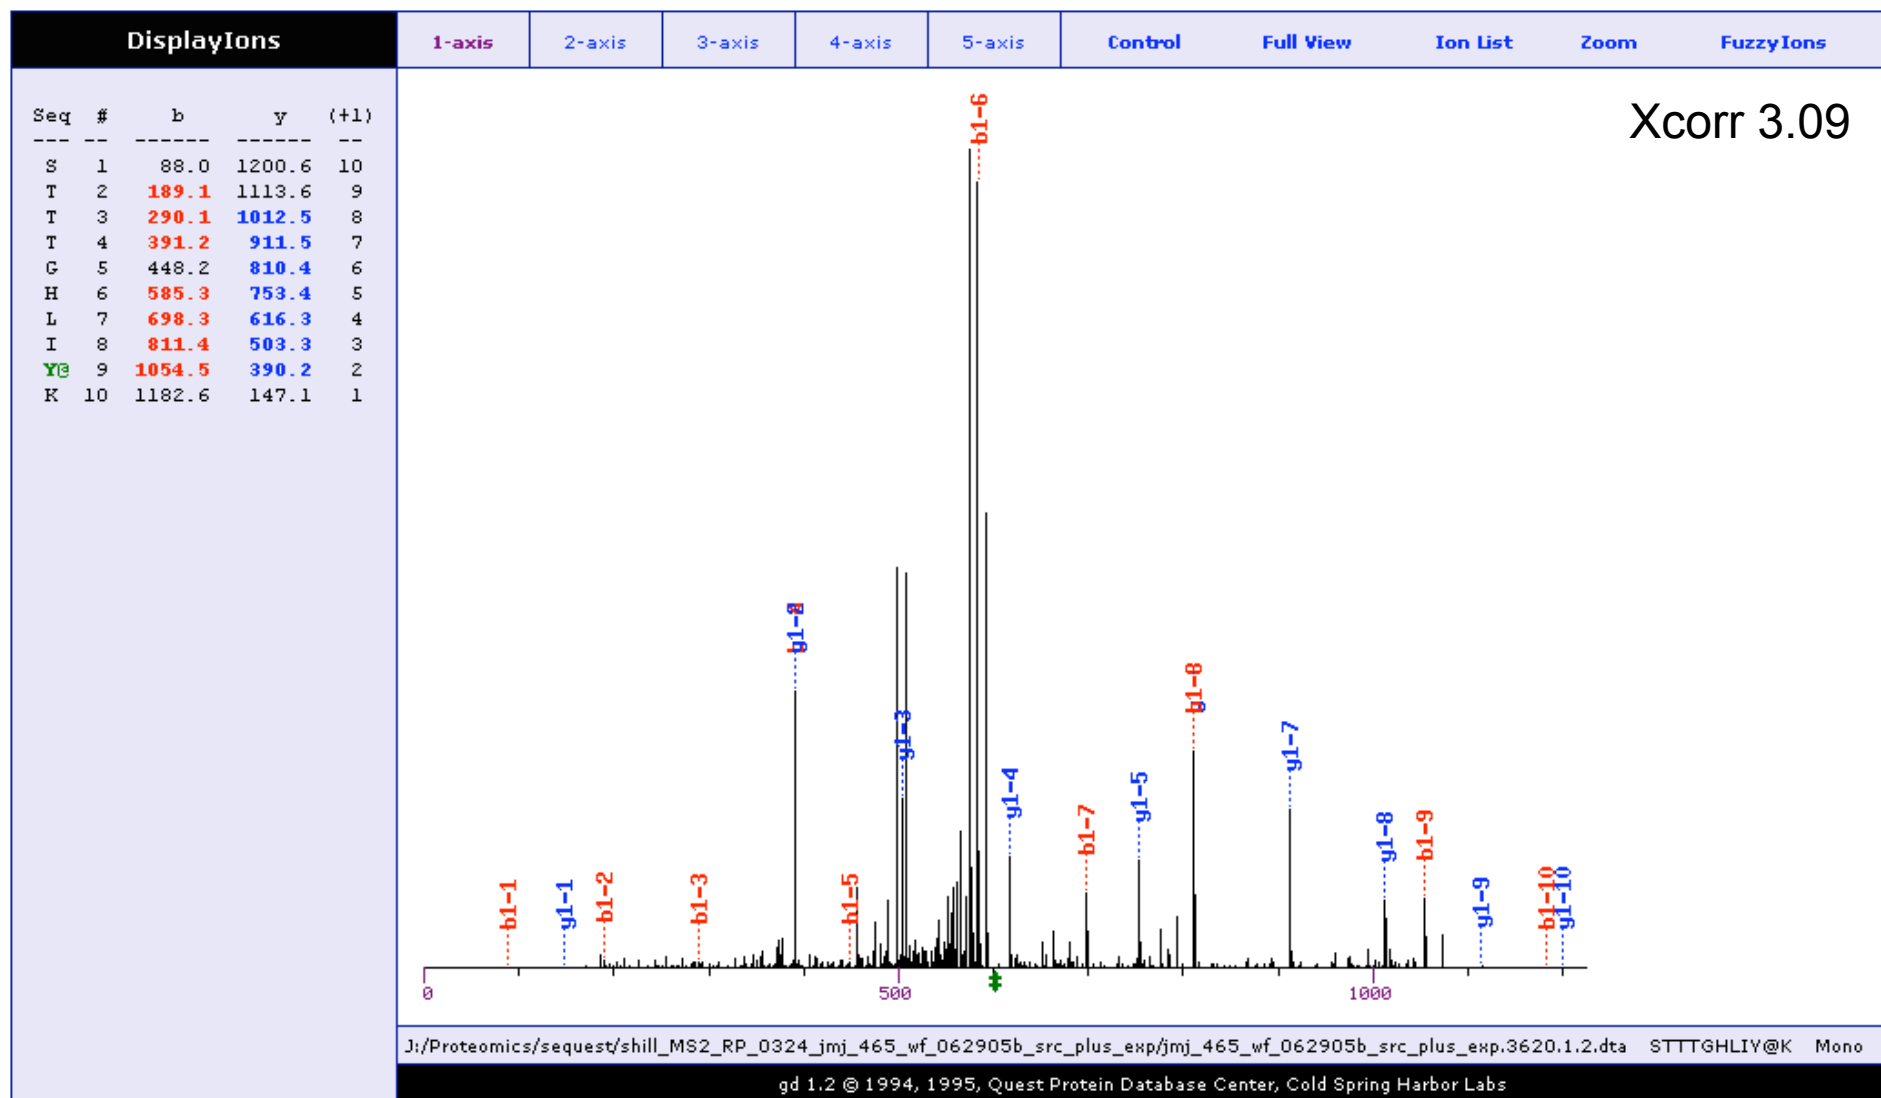

eEF1A-1 pY141 R.EHALLAY@TLGVK.Q

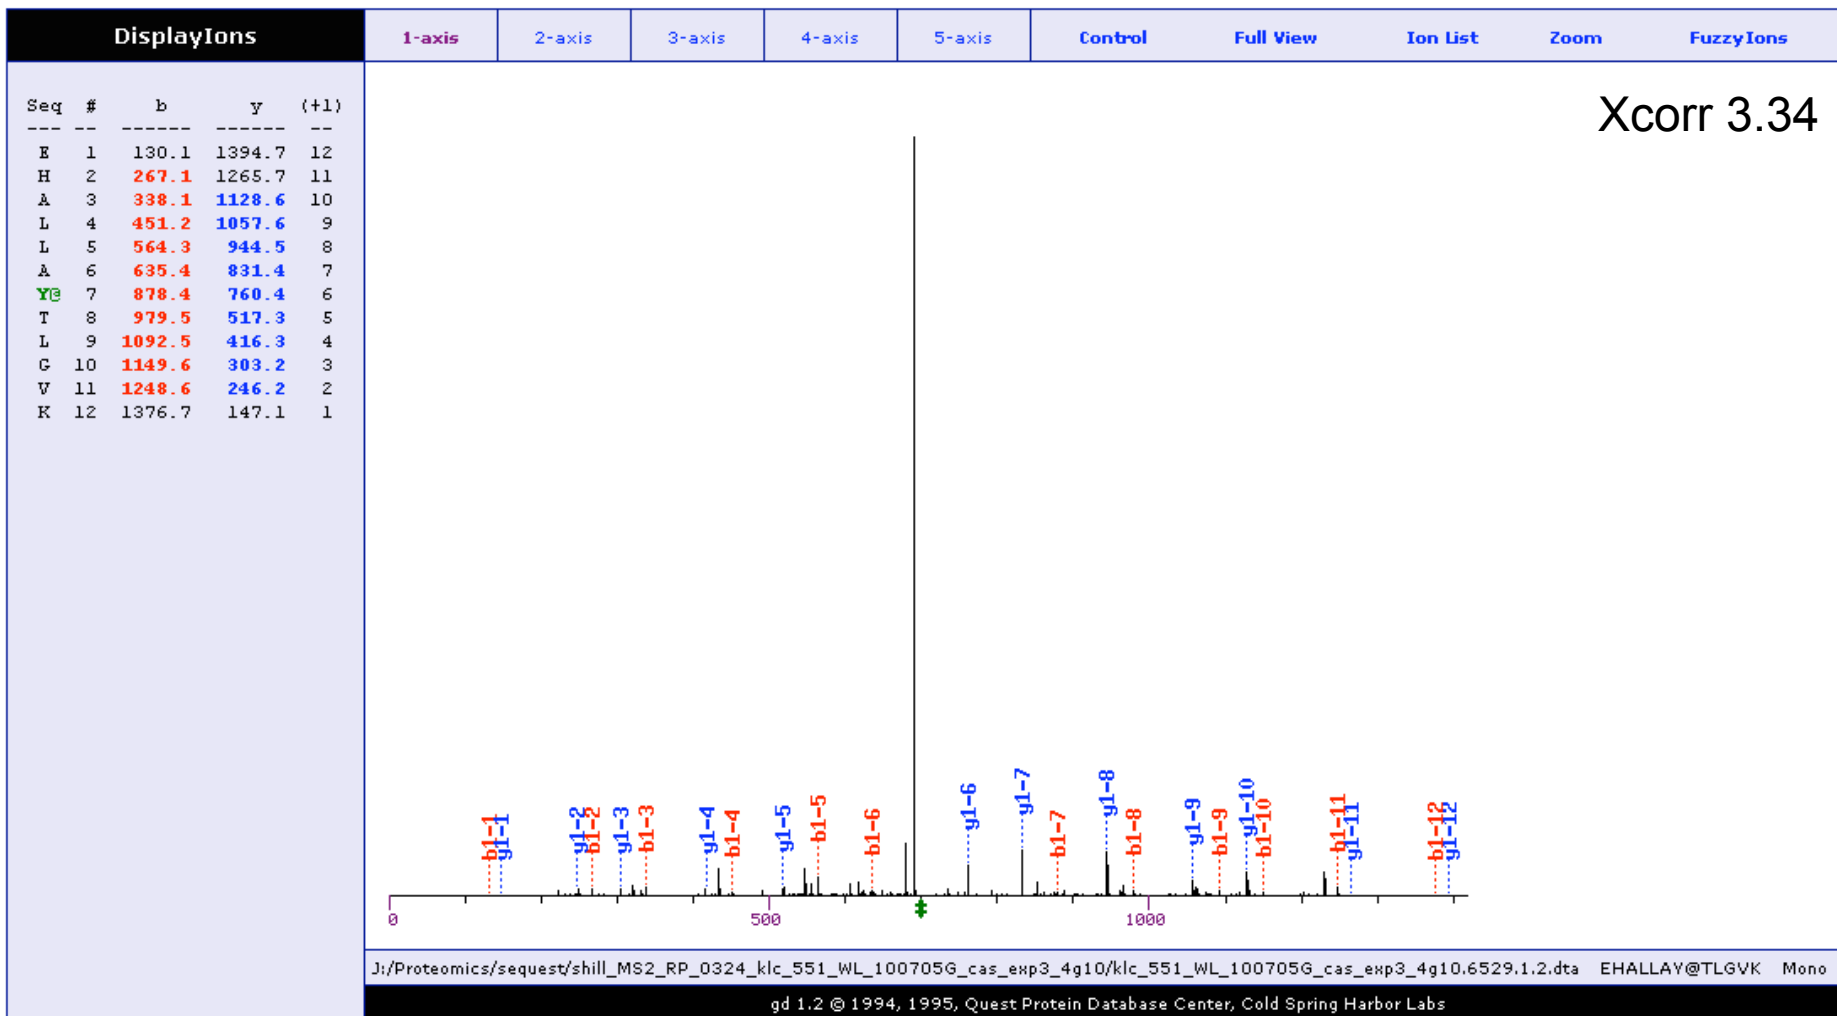



Cbl pY672

K.PSSSANAIY@SLAARPLMPK.L

Xcorr 4.45

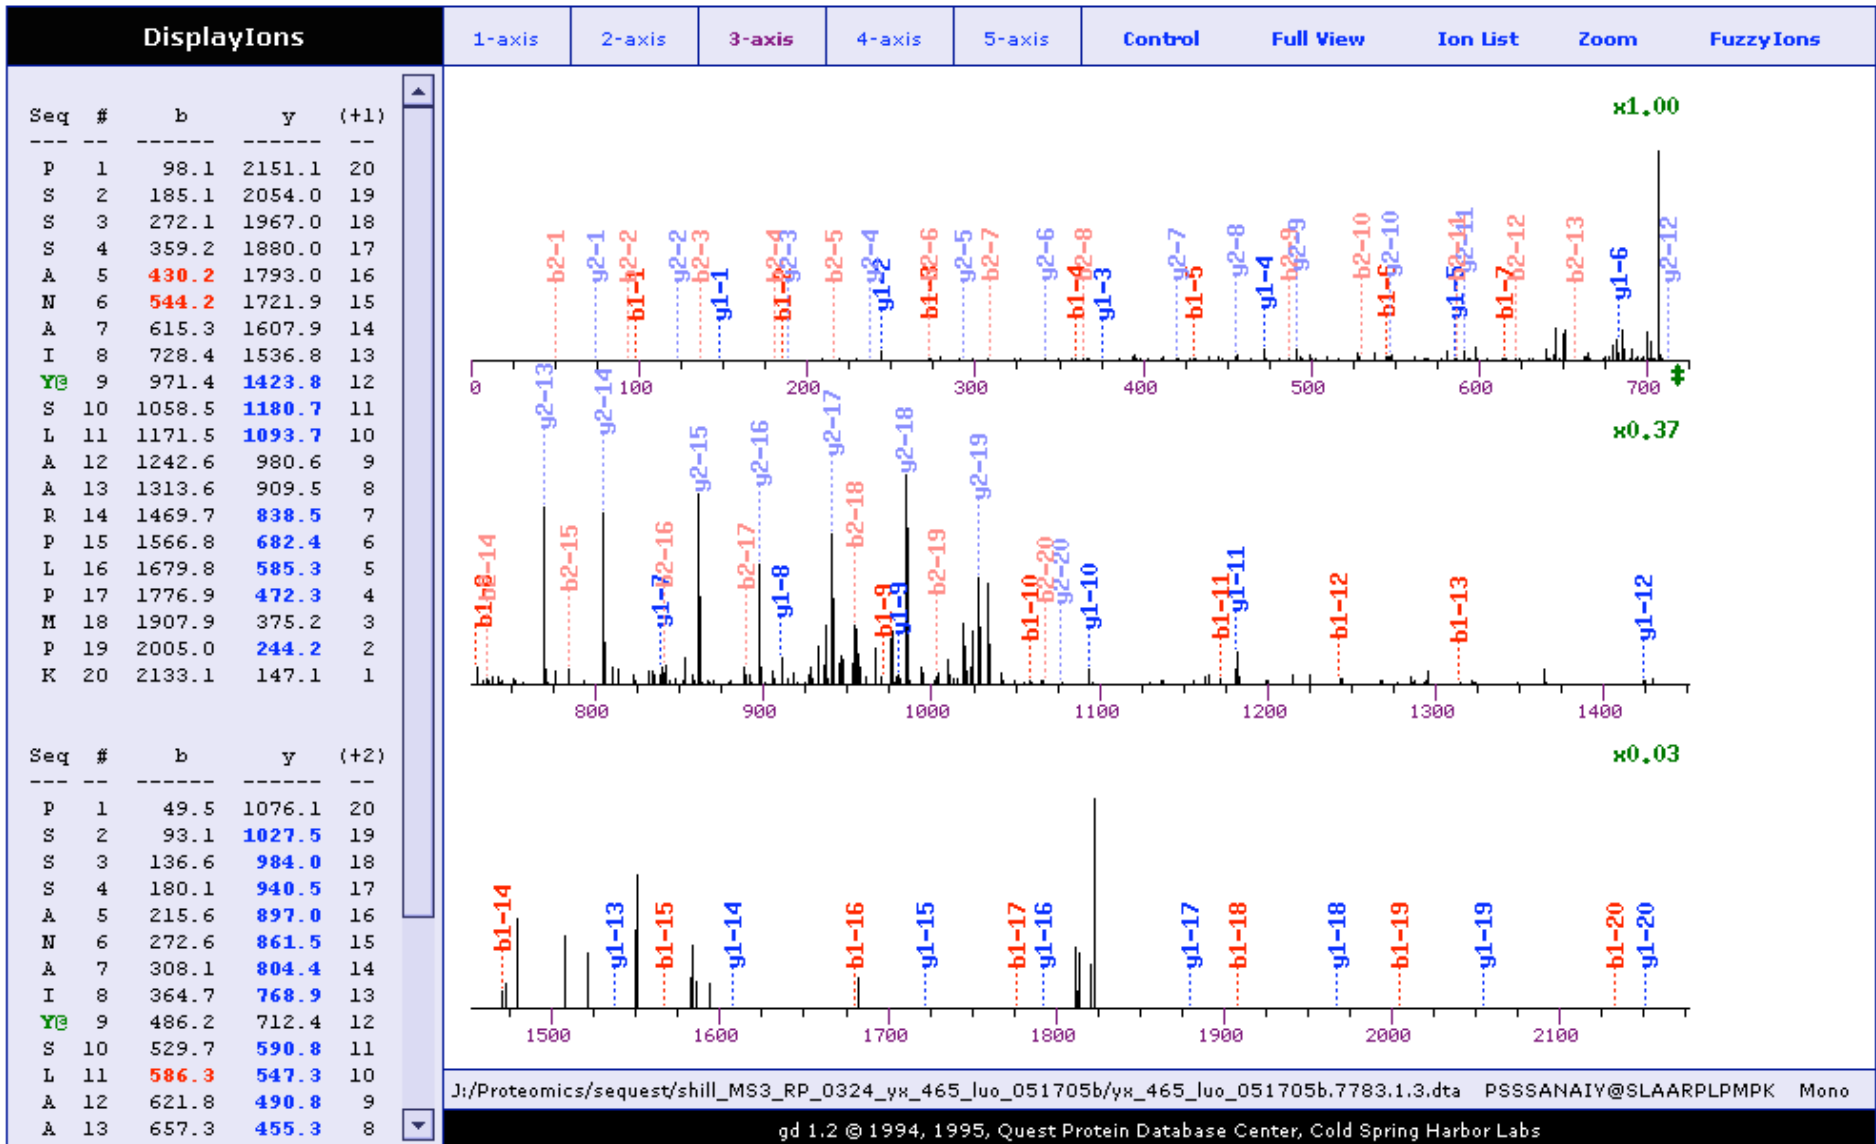

Cbl pY672

K.IKPSSSANAIY@SLAARPLMPK.L

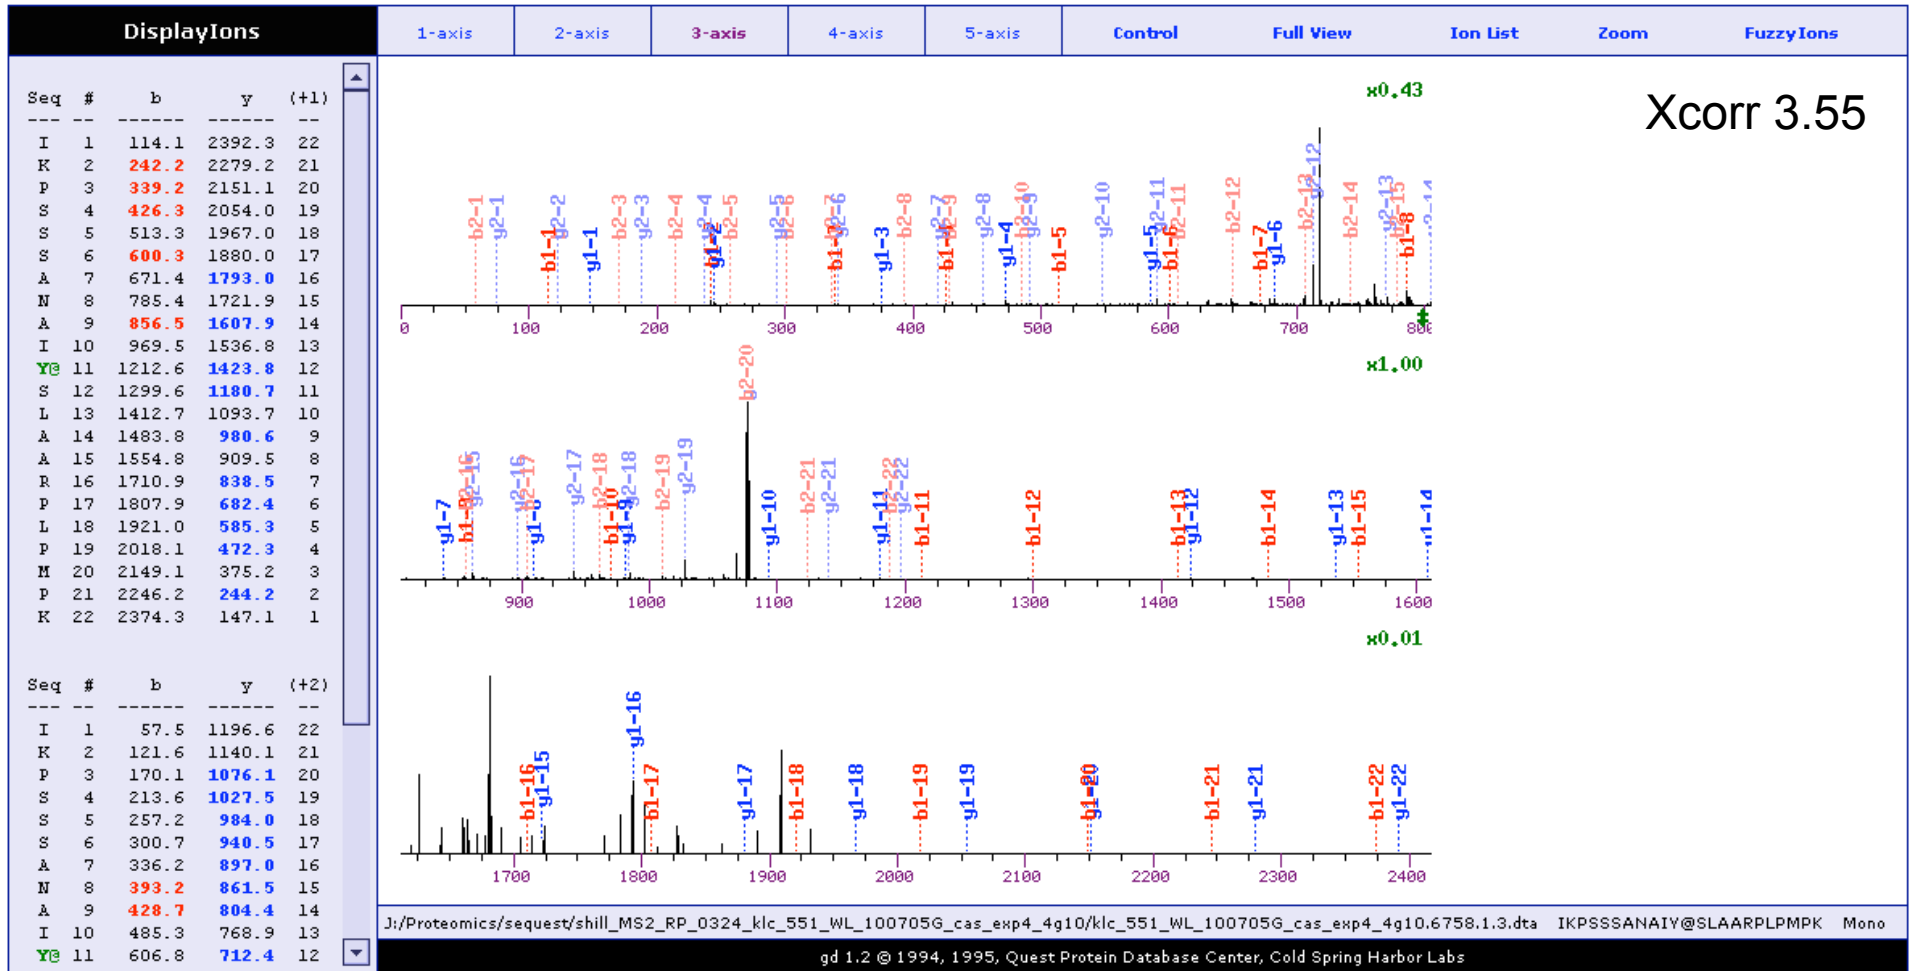

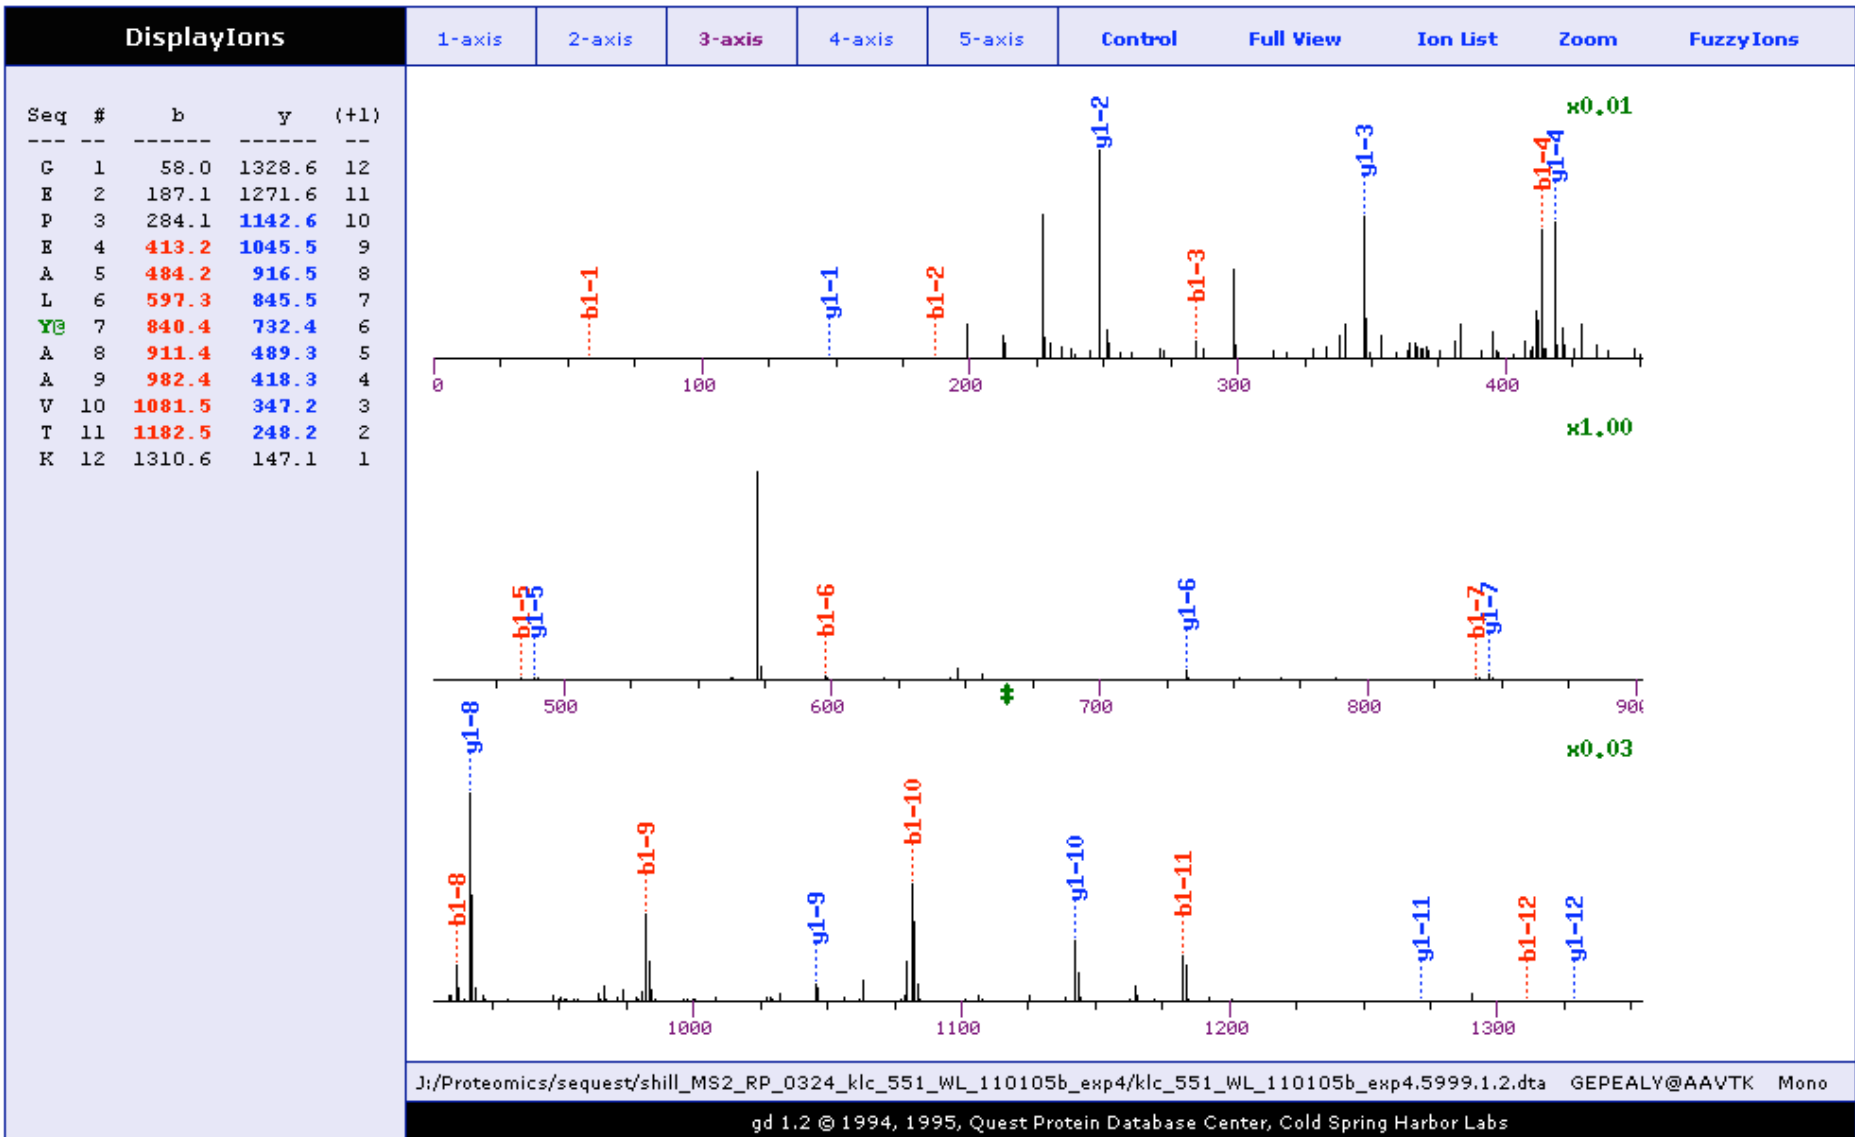

CDV3A pY213

R.KTPQGPPEIY@SDTQFPSLQSTAK.H

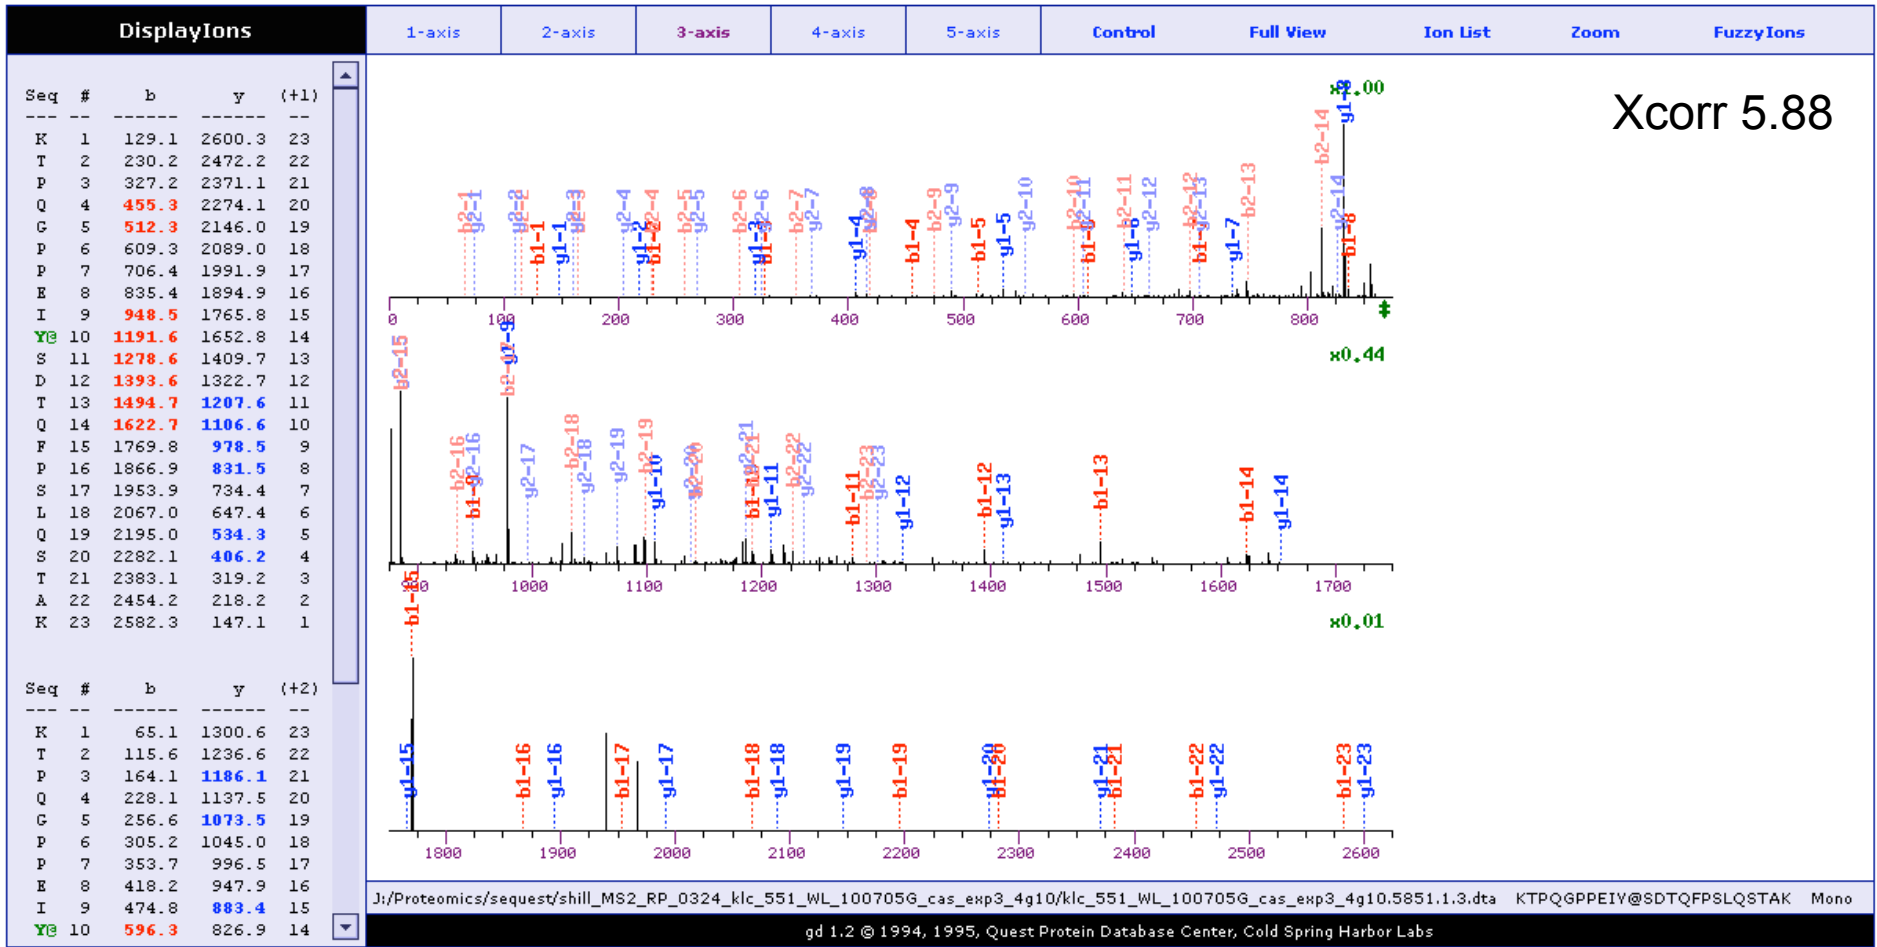

CDV3A pY213

R.KTPQGPPEIY@SDTQFPSLQSTAK.H

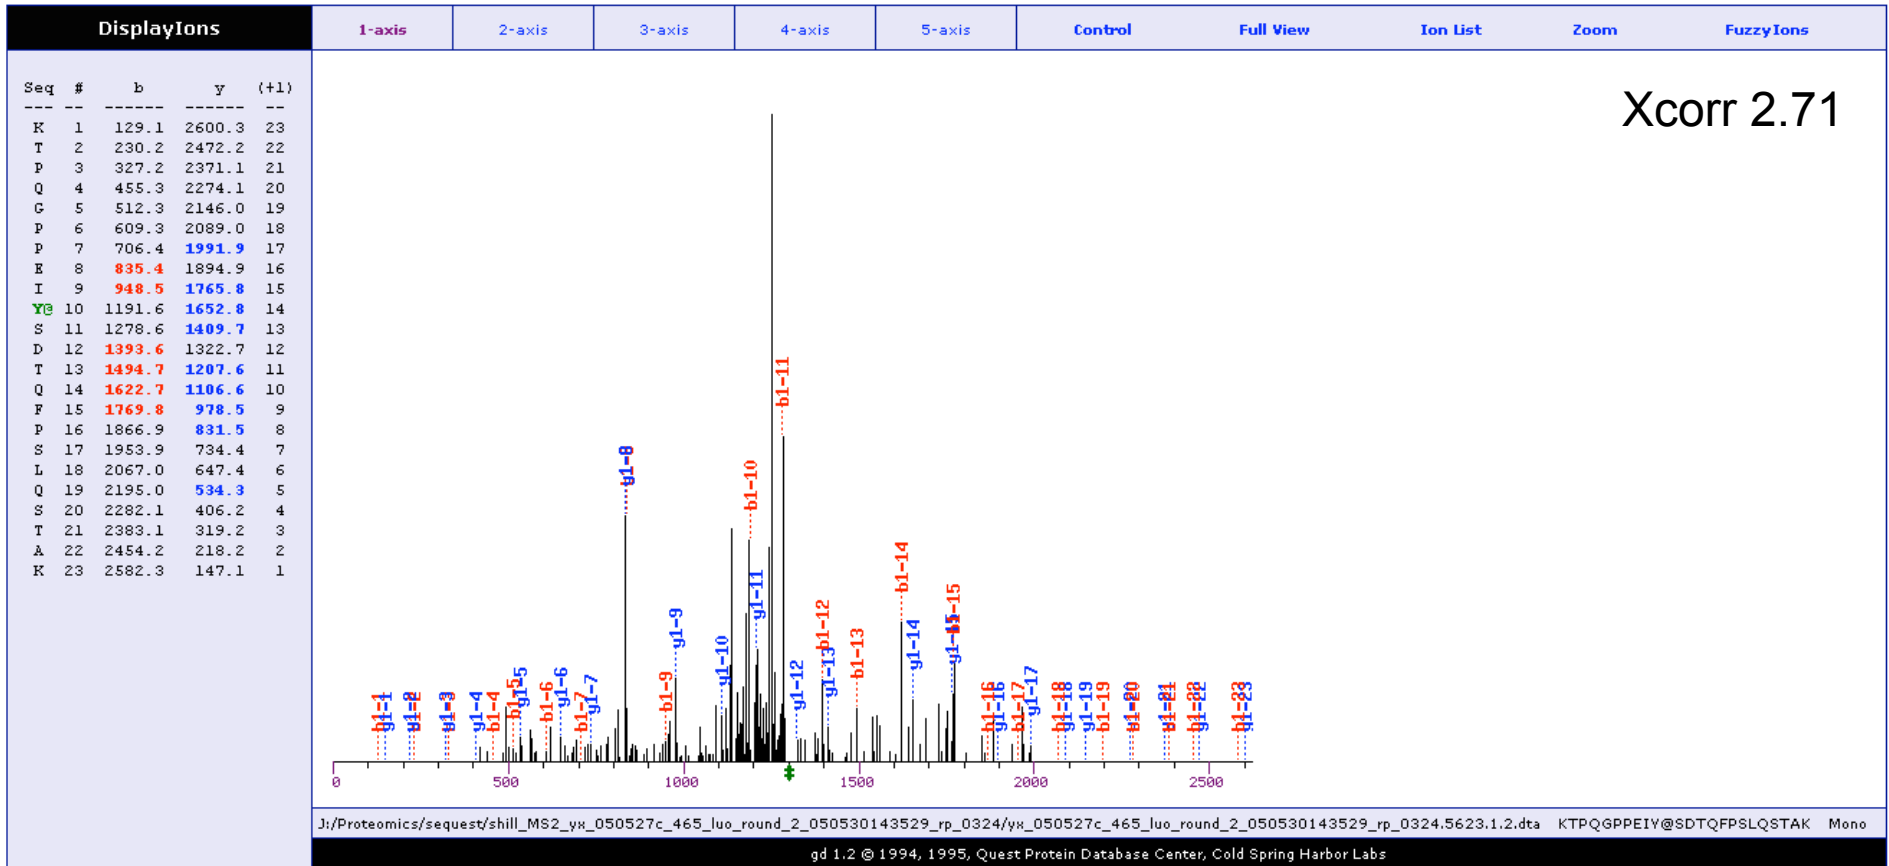

# CDV3A pY213 L.TTTRKTPQGPPEIY@SDTQFPSLQ.S

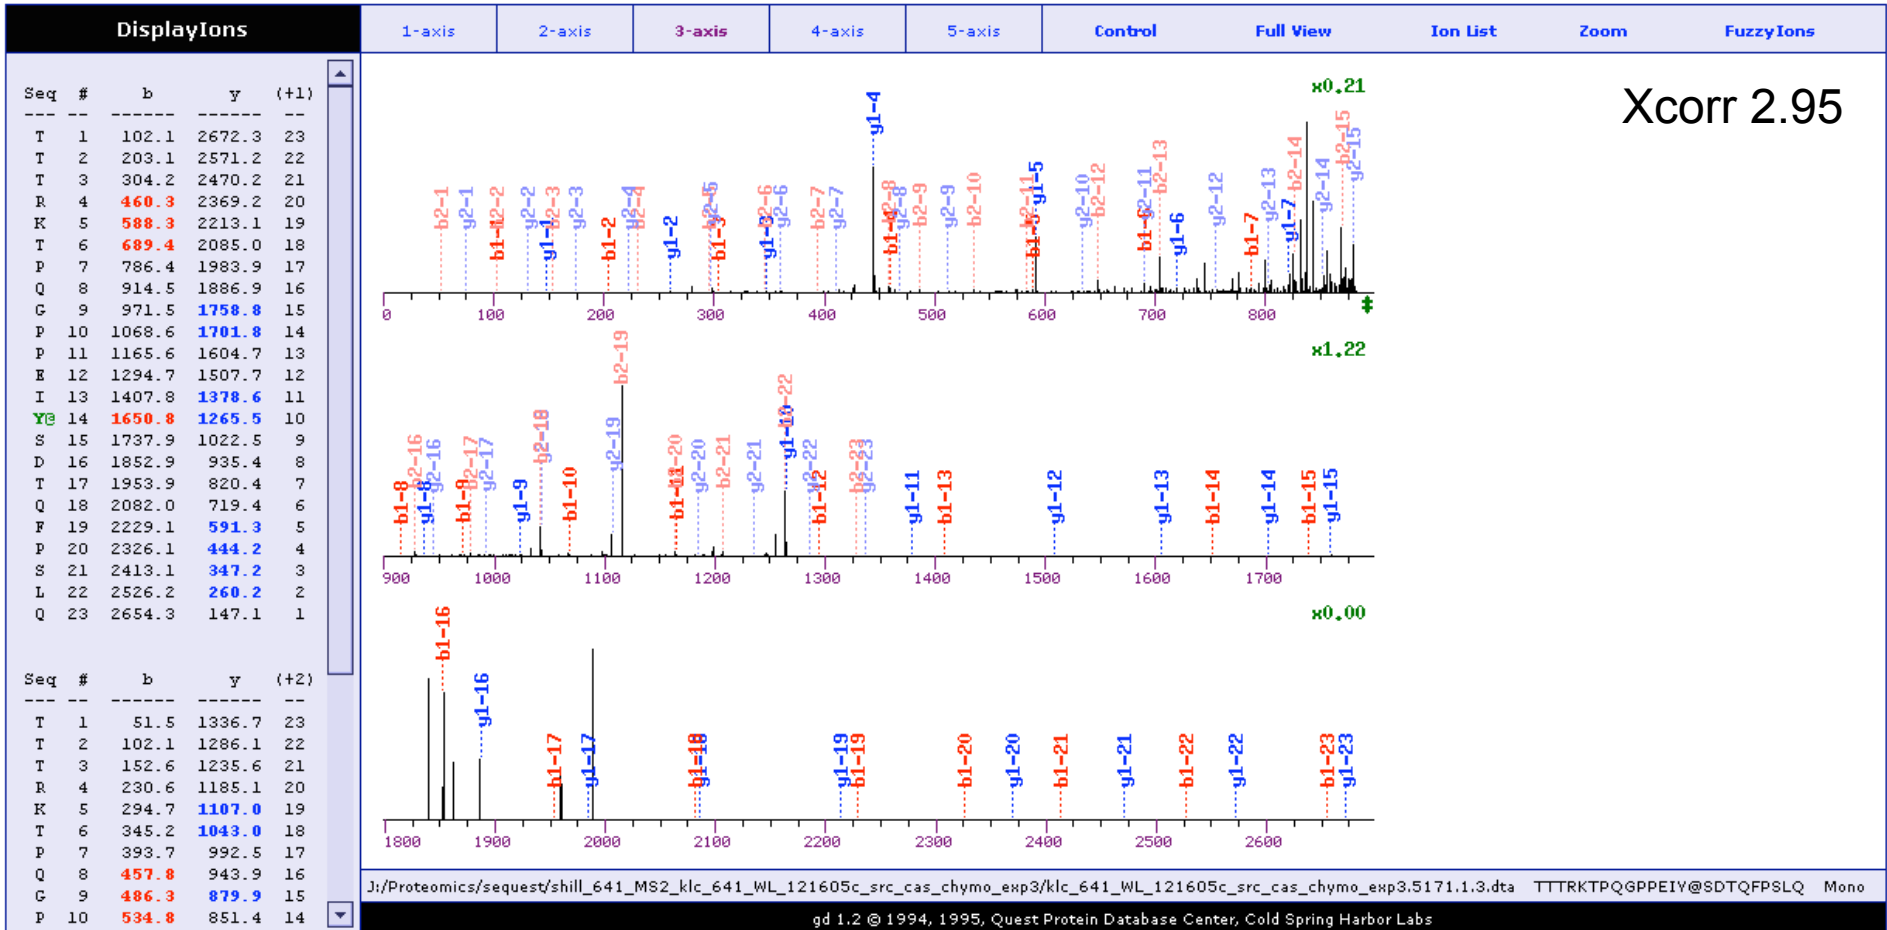

sim. Oligophrenin-1 pY371

R.KLWLEAMDGKEPIY@TLPALISK.K

Xcorr 4.65

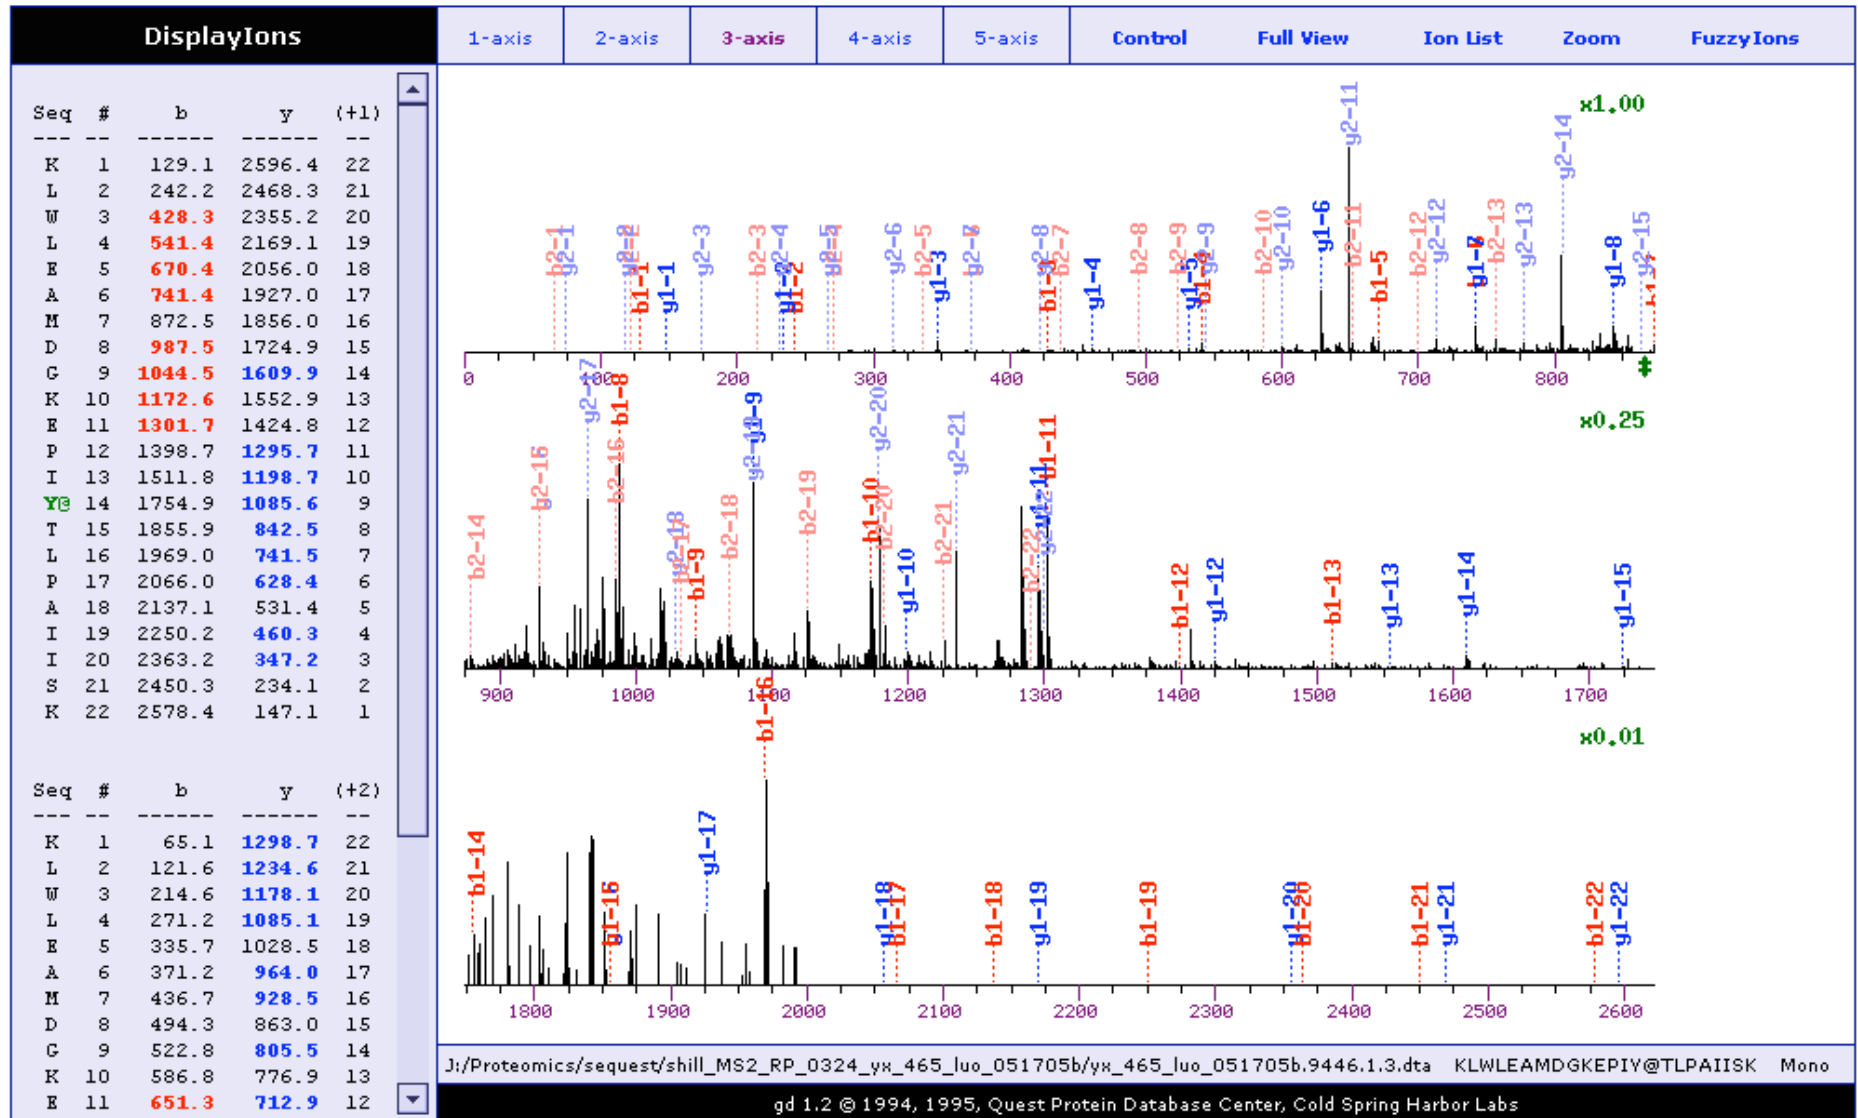

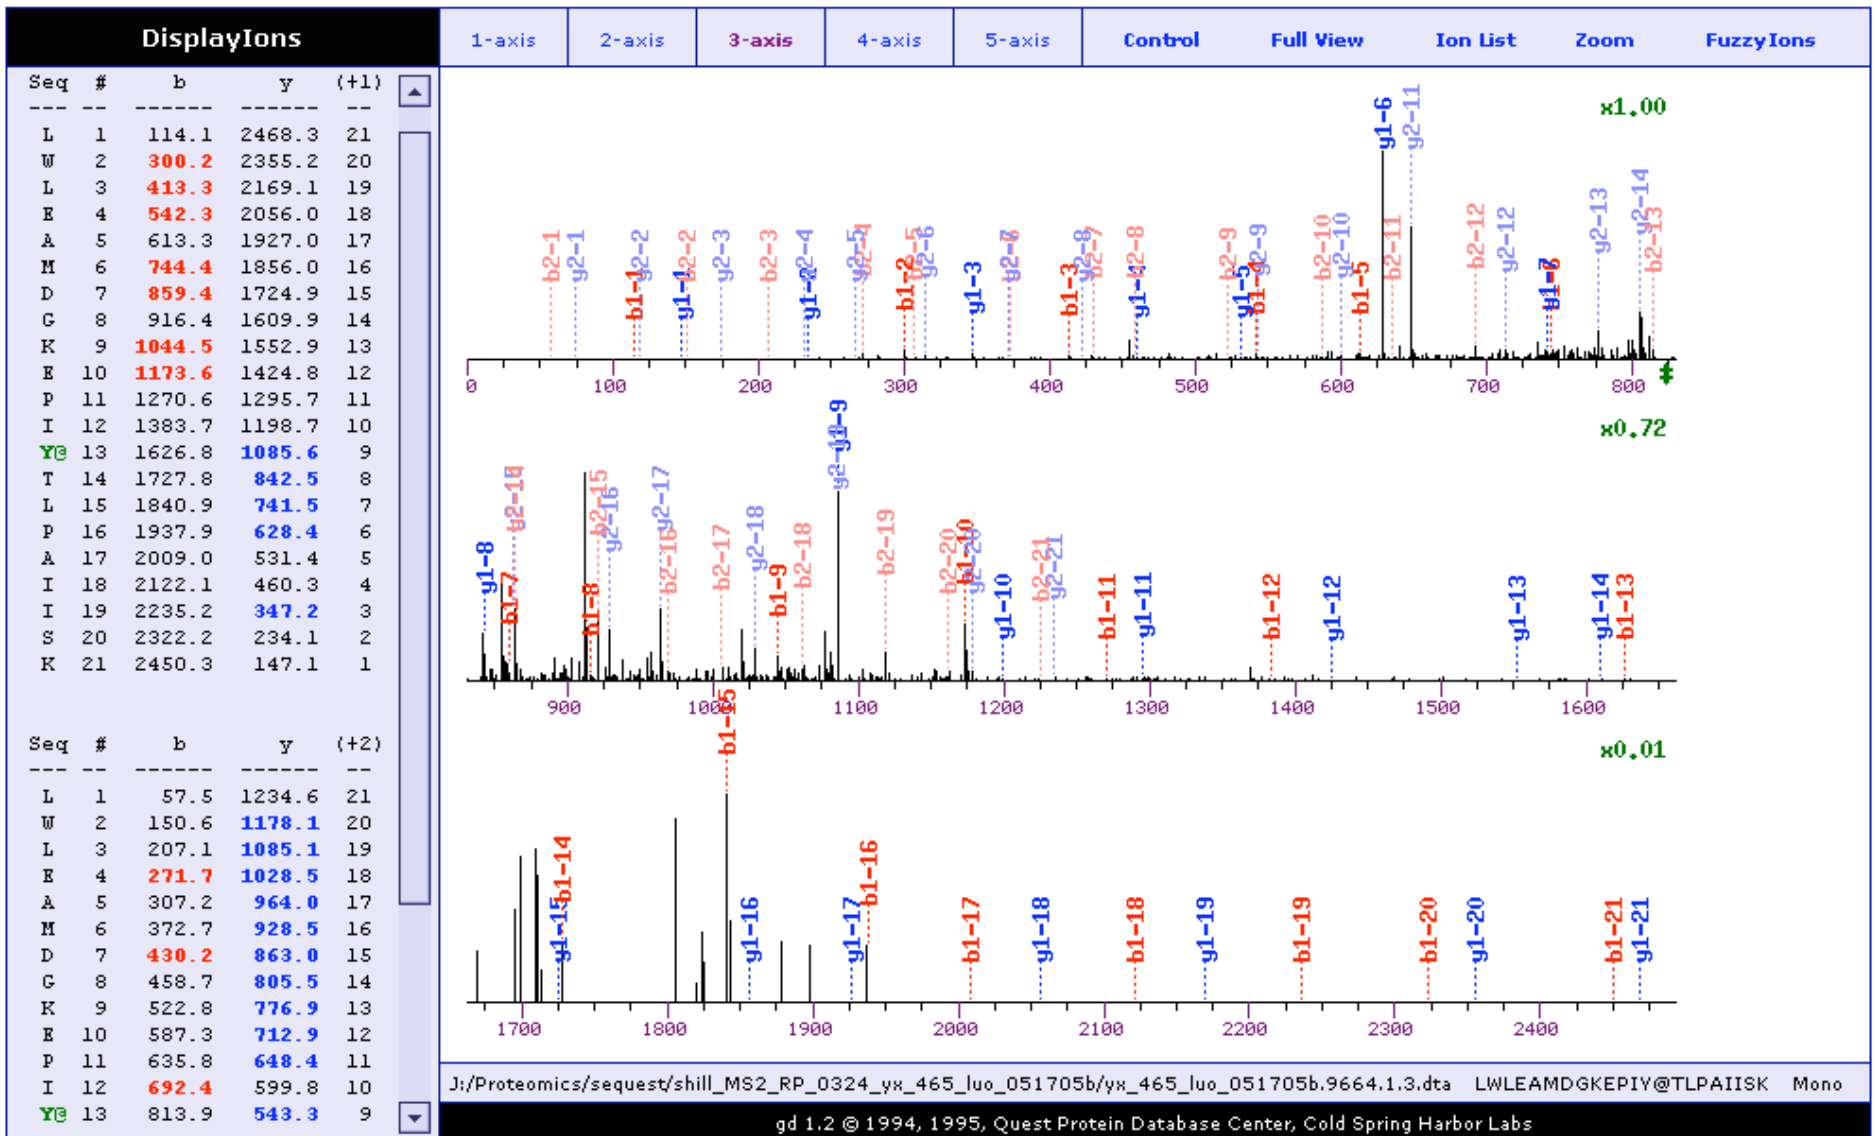

Supplement: NIHMS60500-supplement-Fig__S1.pdf [file NIHMS60500-supplement-Fig__S1.pdf]
