# Supplementary material
Source: PubMed Central journal article supplement (PMC2579752)

**Supplemental Figure S2. Representative spectra showing quantitation of pTyr peptides using SILAC.** The MS spectra show the fold change in the level of heavy labeled pTyr peptide (Src-transformed) versus light peptide (nontransformed). The MS/MS spectra show the annotation of fragment ions (b and y ions) confirming the sequence and phosphorylation sites (*pY*). Asterix (\*) represents the  $^{13}\text{C}_6$  labeled amino acid (R/K). MS and MS/MS spectra of following peptides are shown in the panels below. Twenty-one peptides are shown on the following pages.

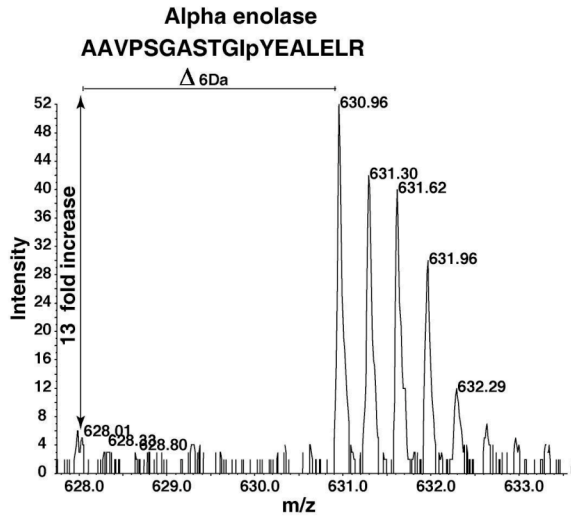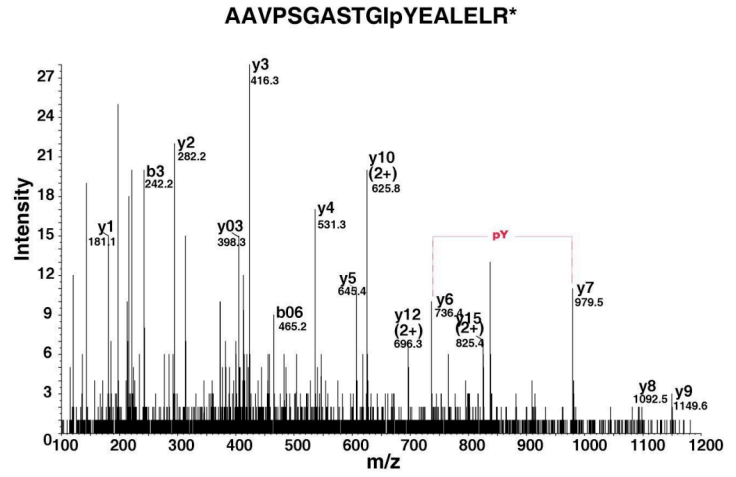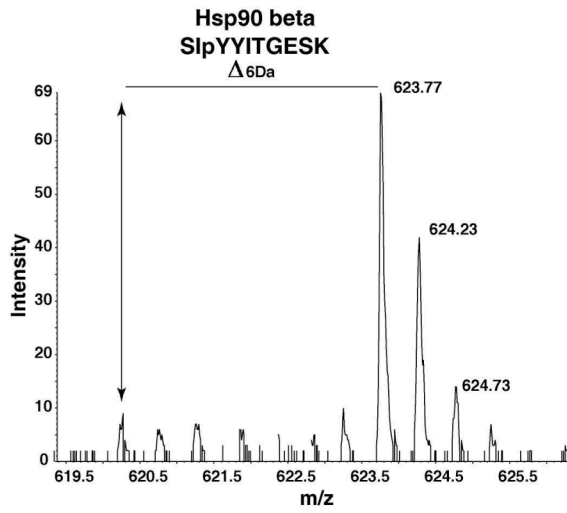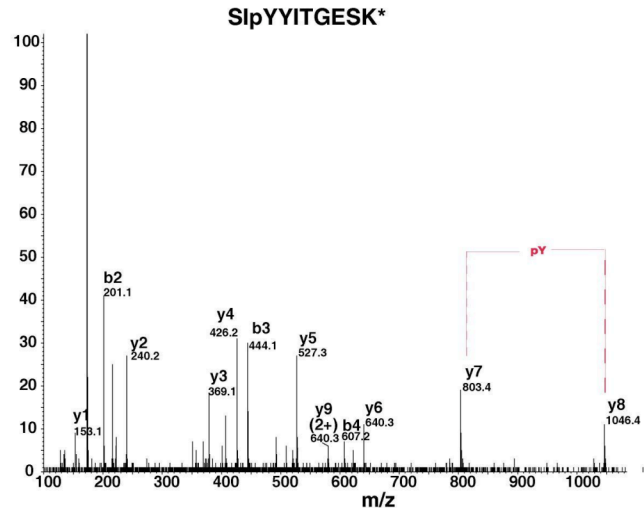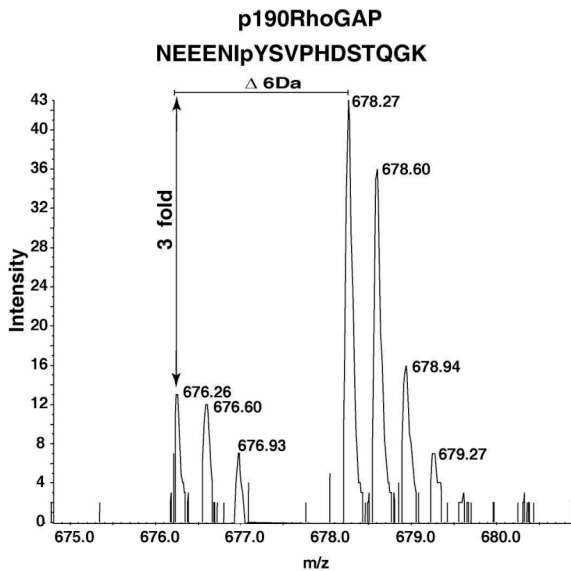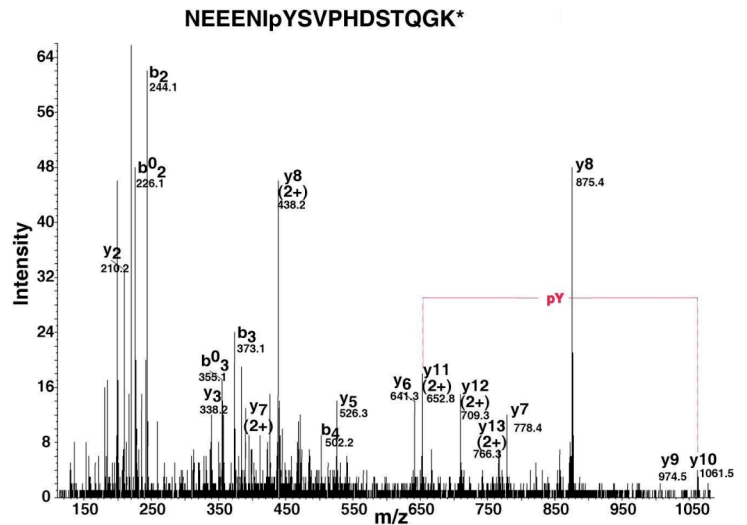

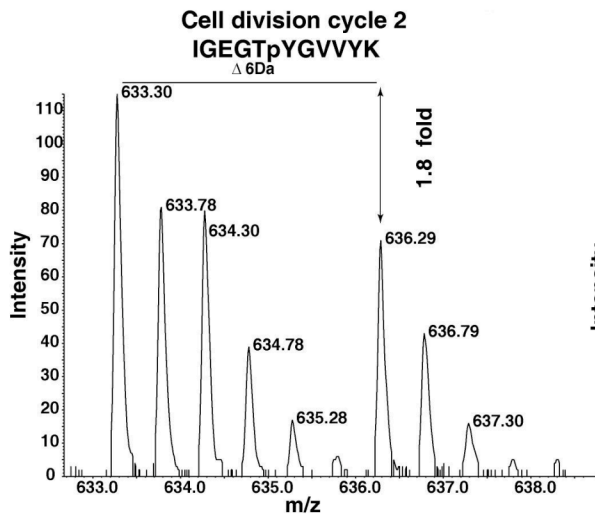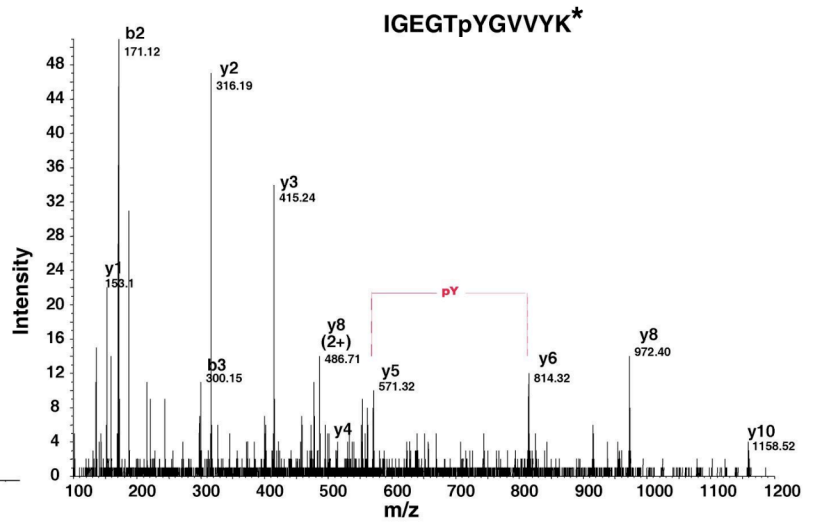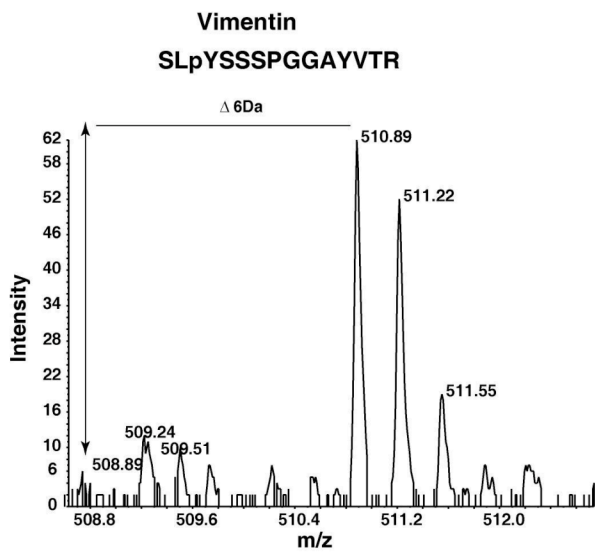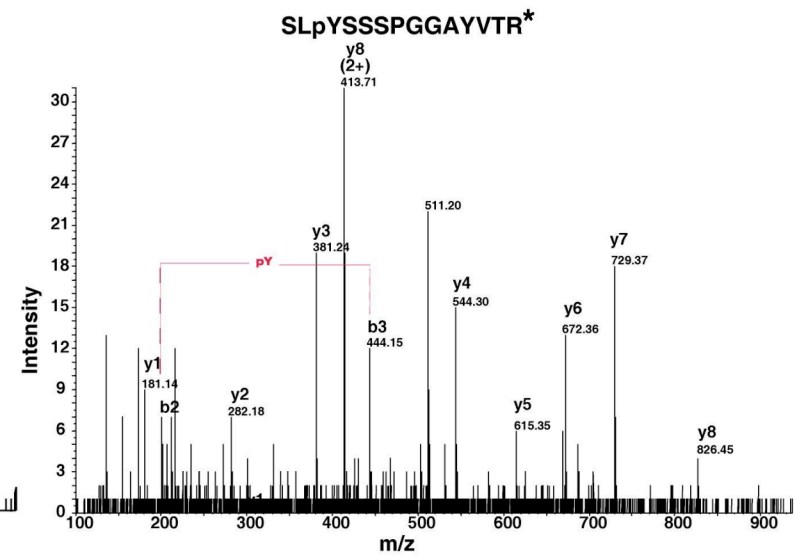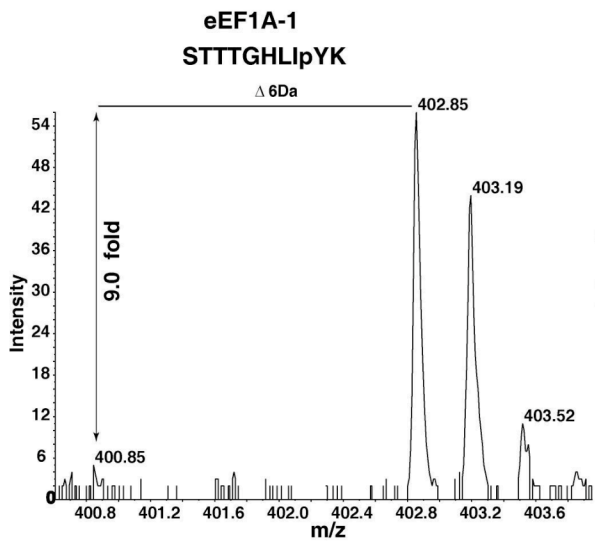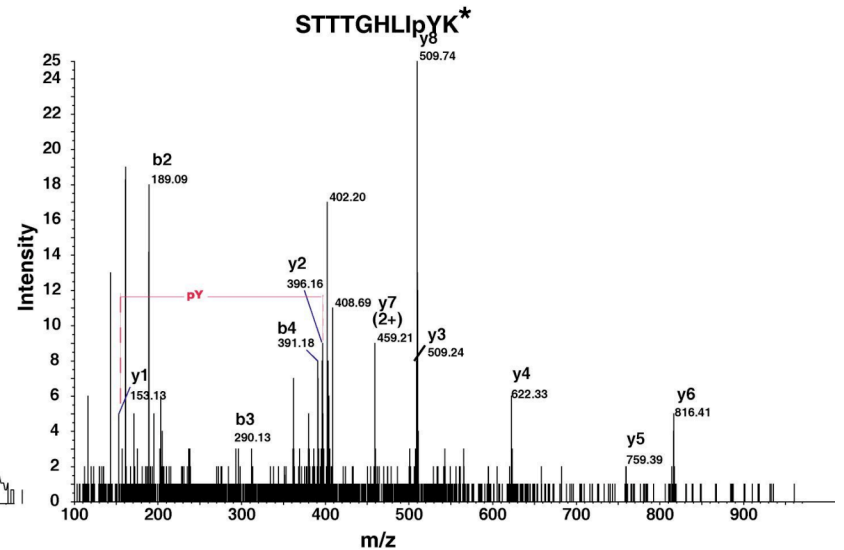

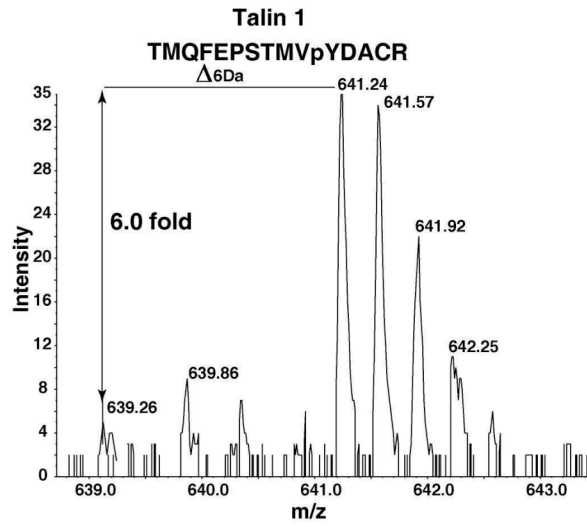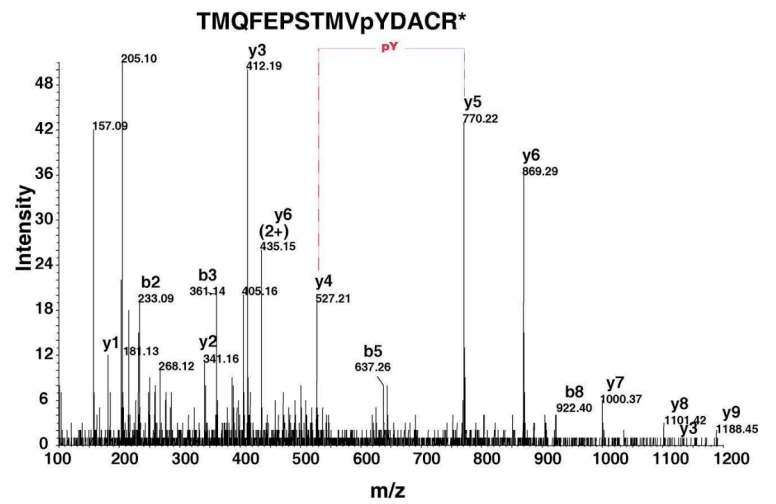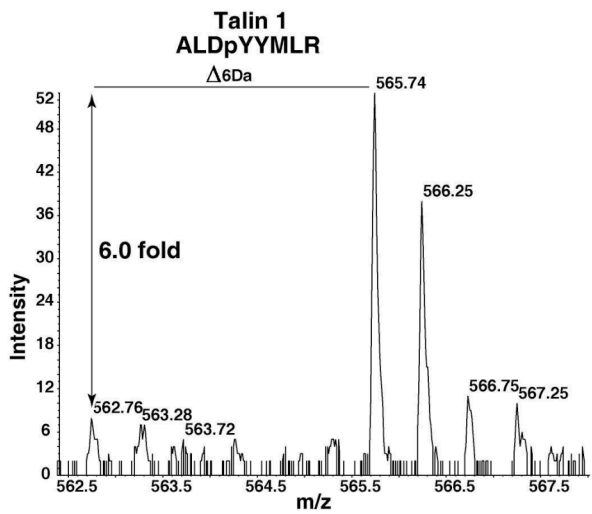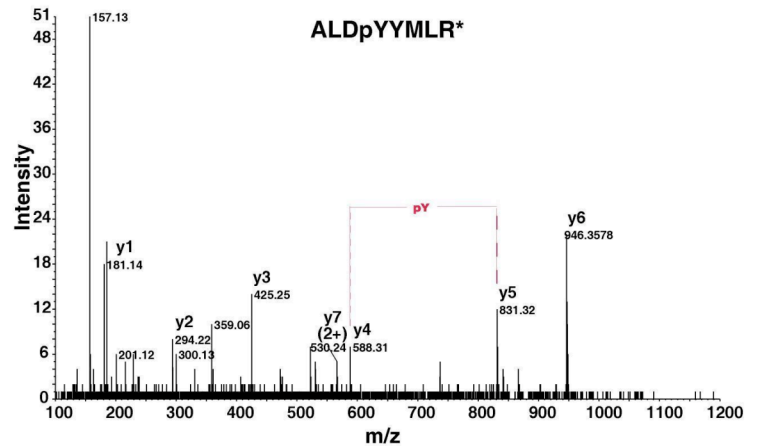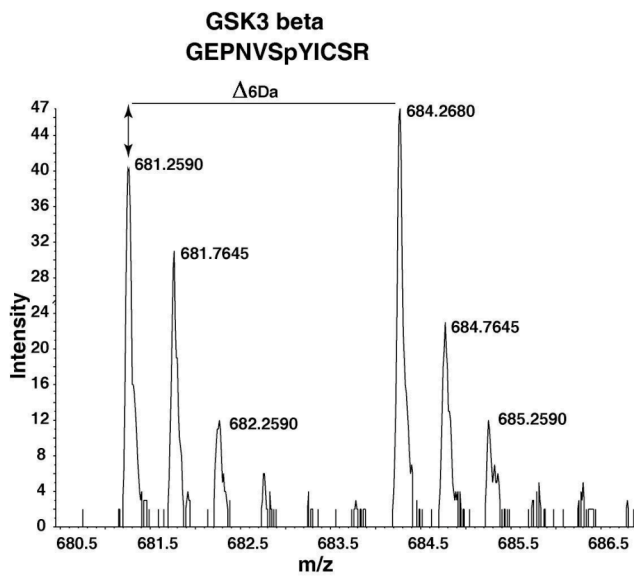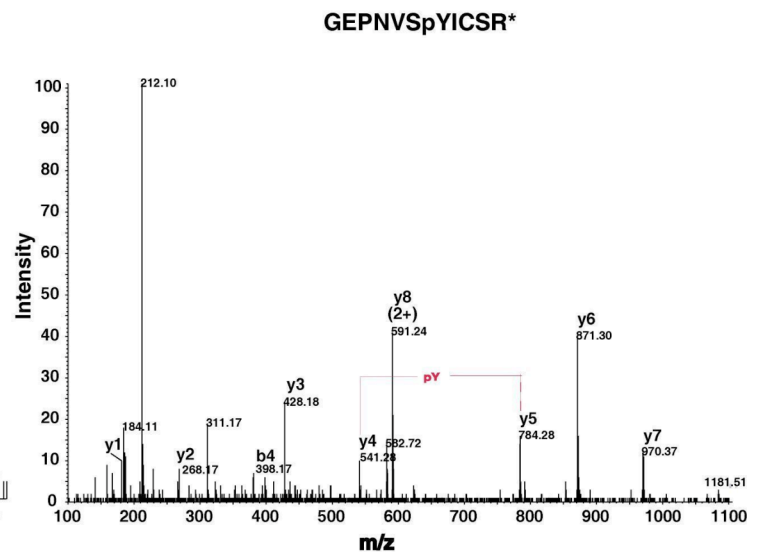

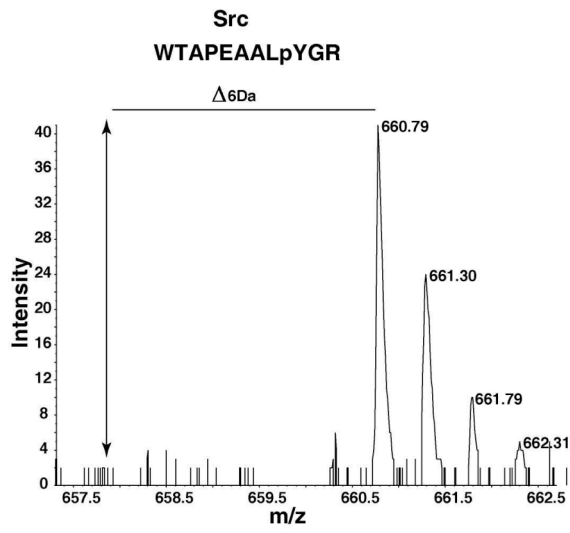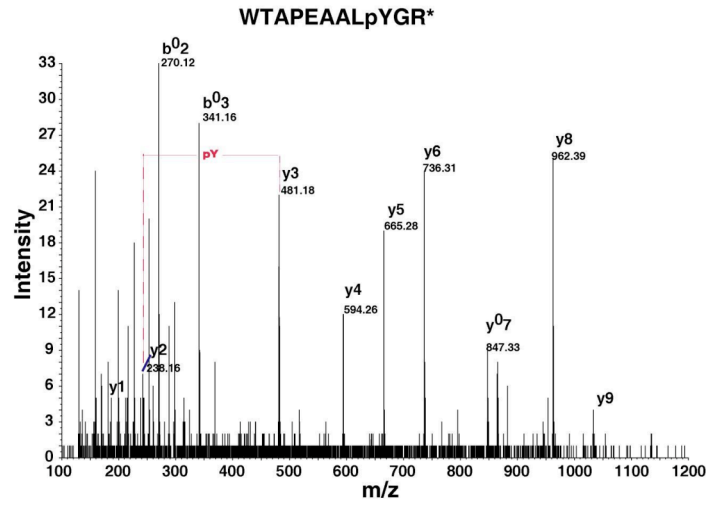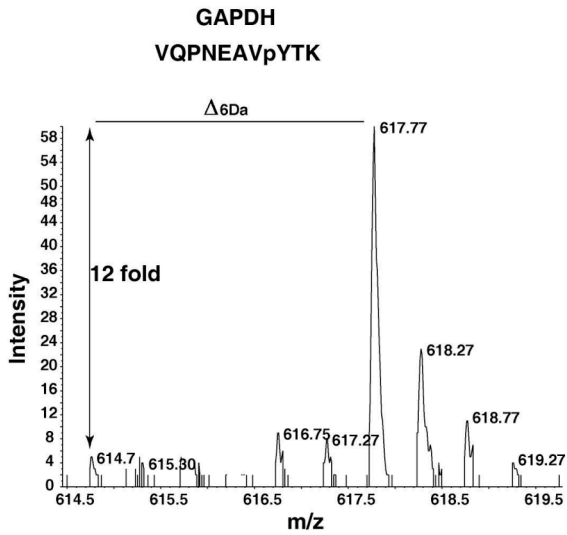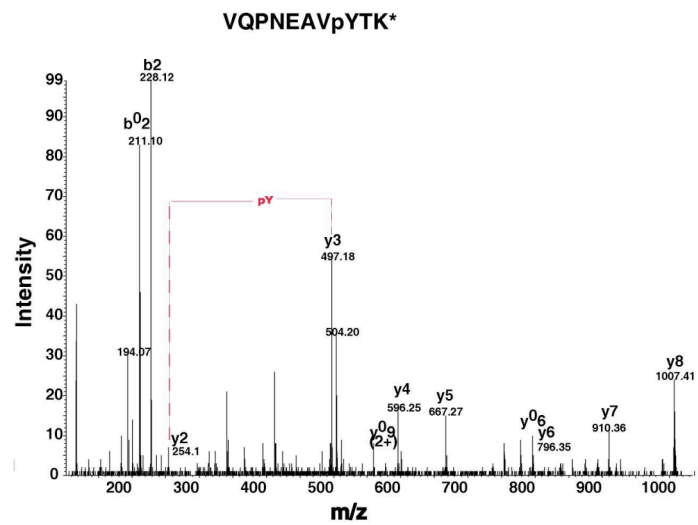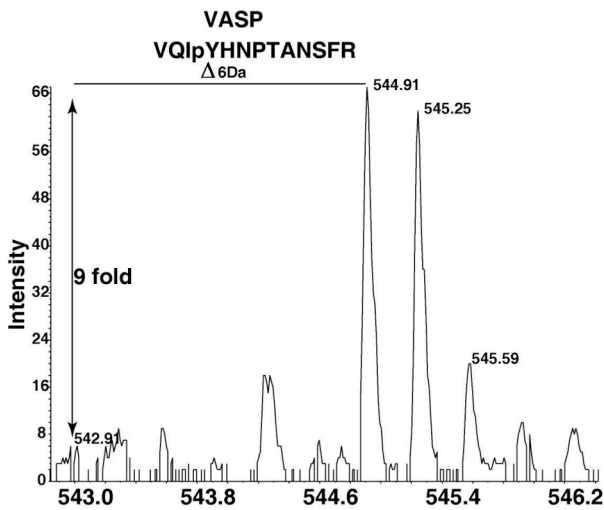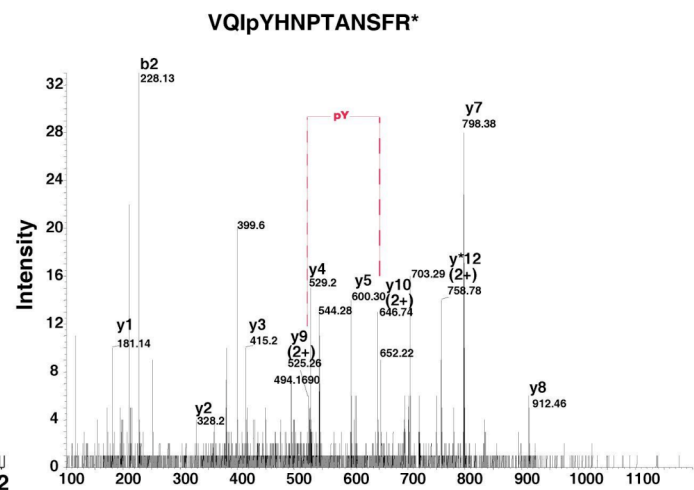

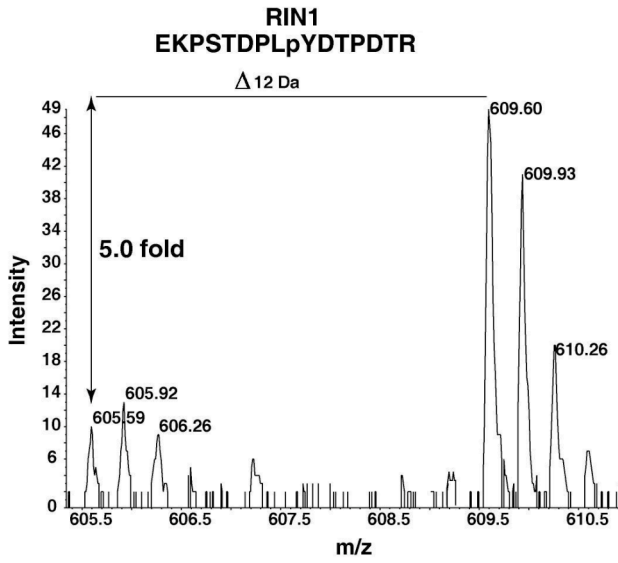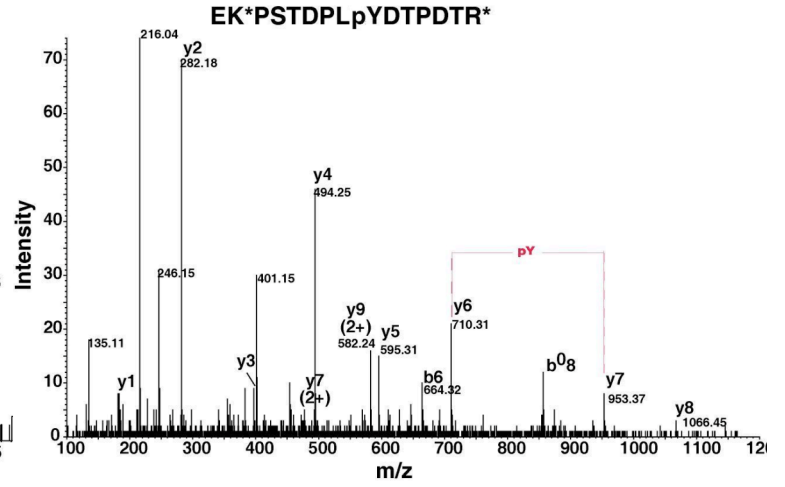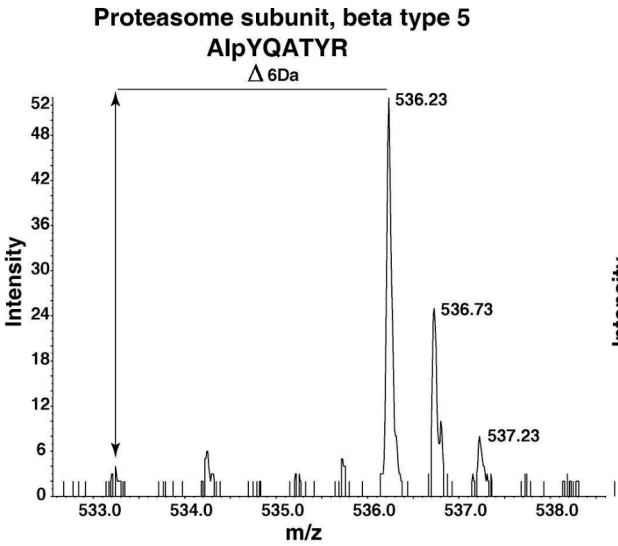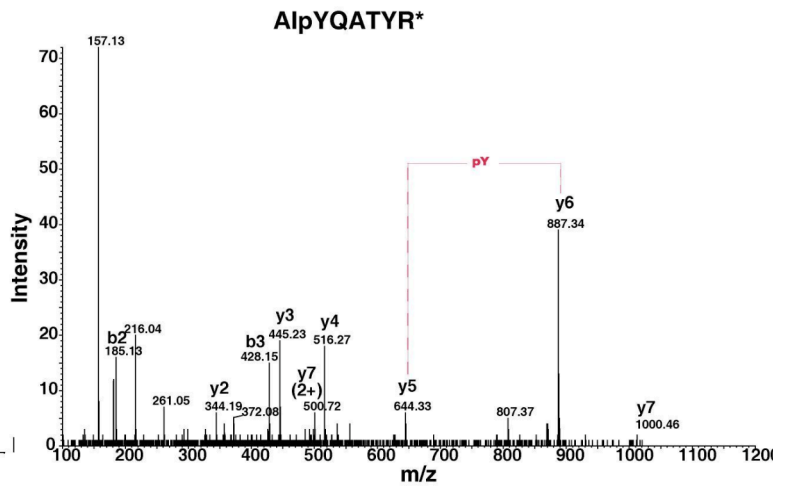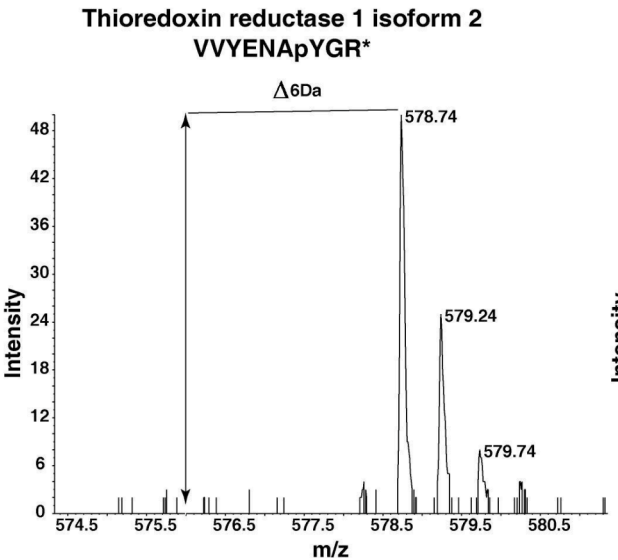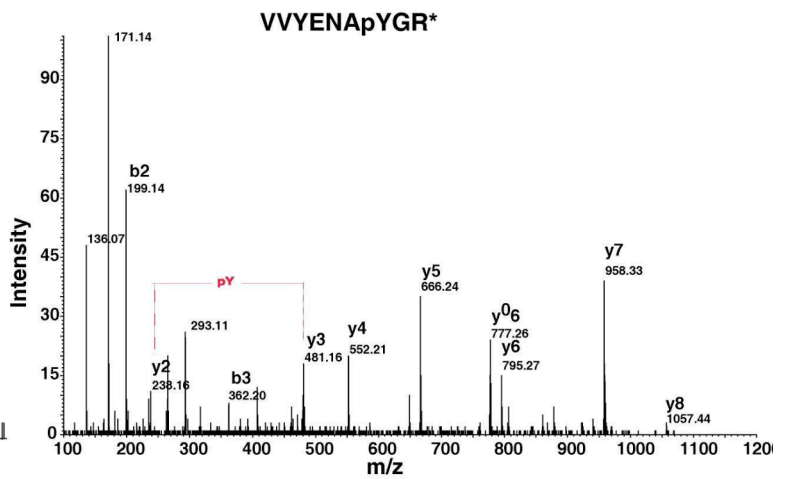

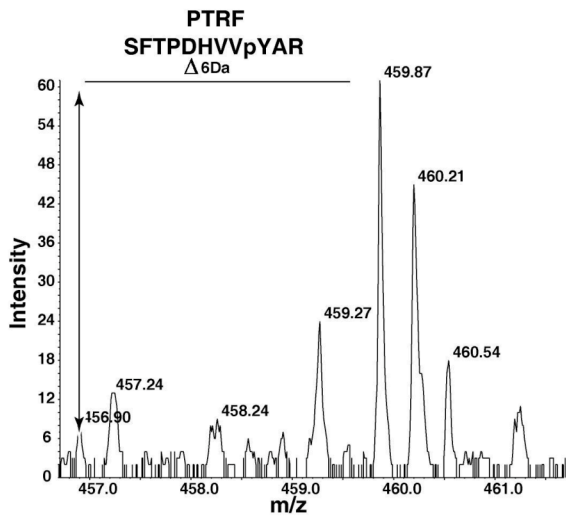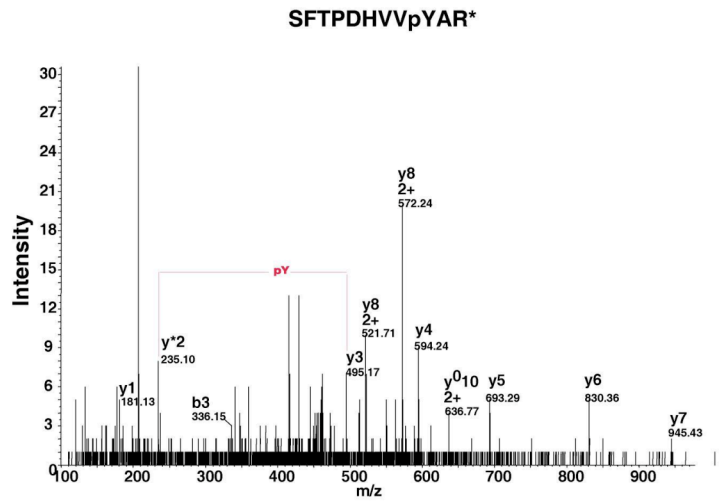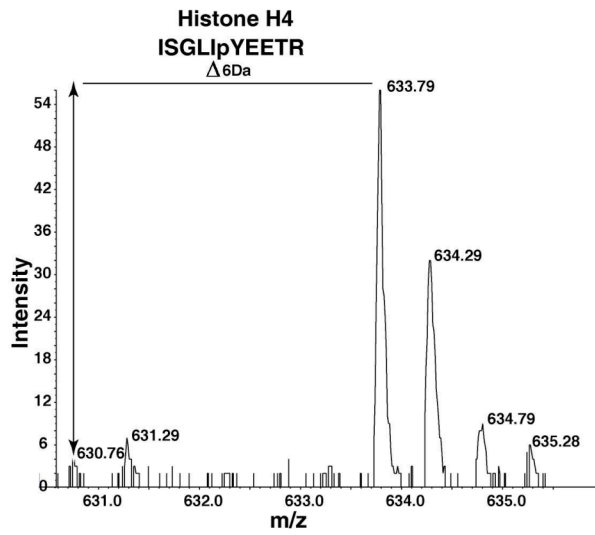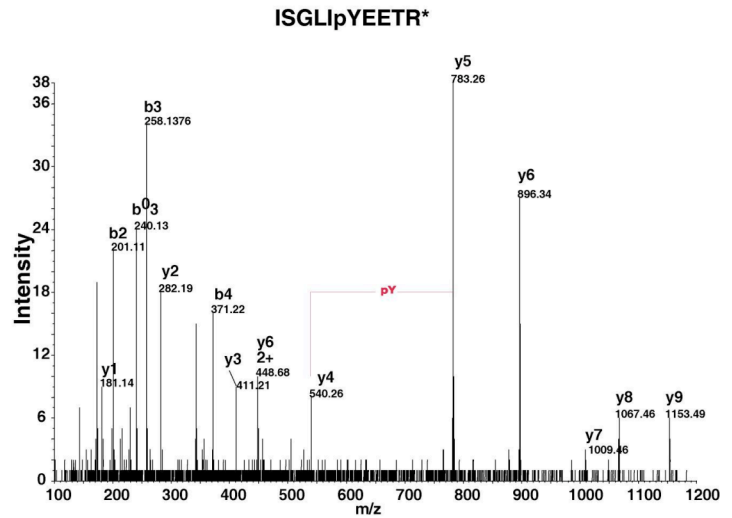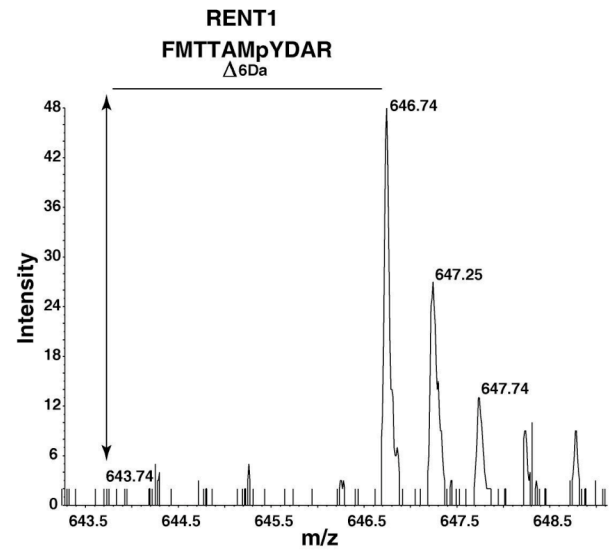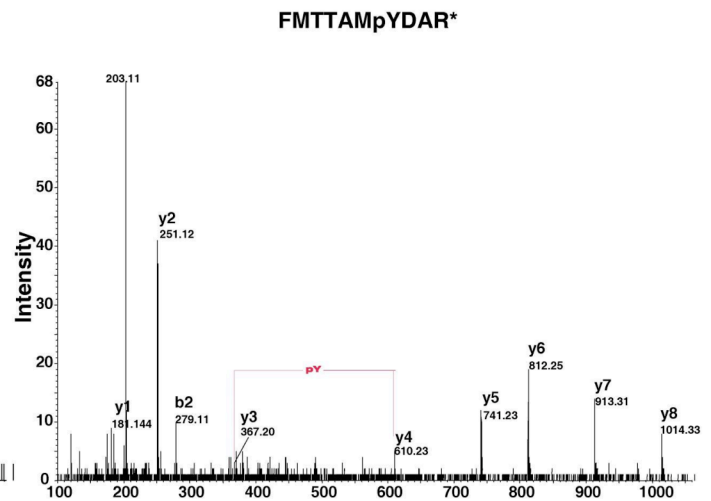

**Eukaryotic translation initiation factor 3**  
**QGTpYGGYFR**

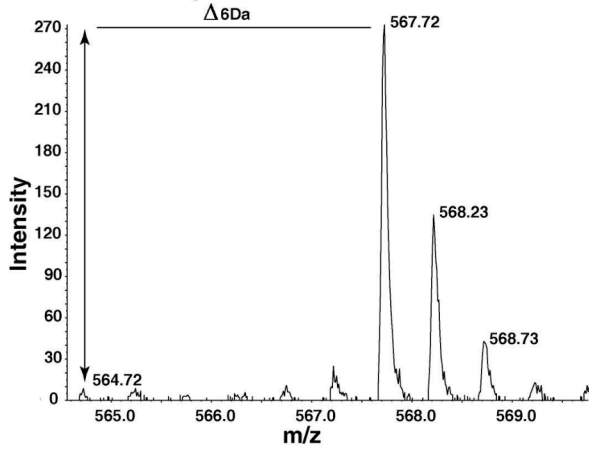

**QGTpYGGYFR\***

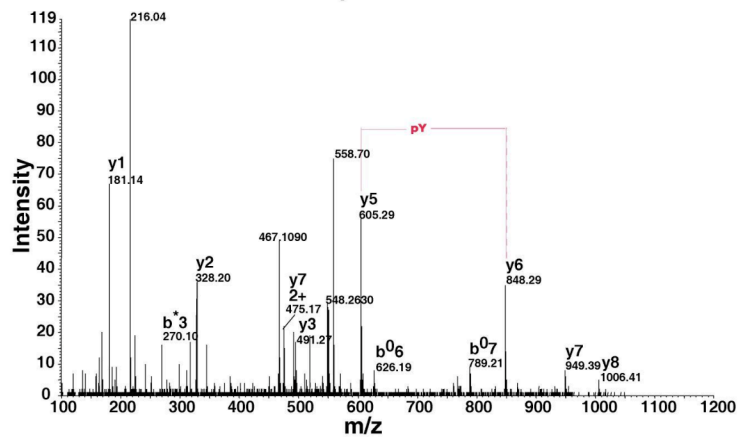

**Clathrin heavy chain**  
**FLRENpYYDSR**

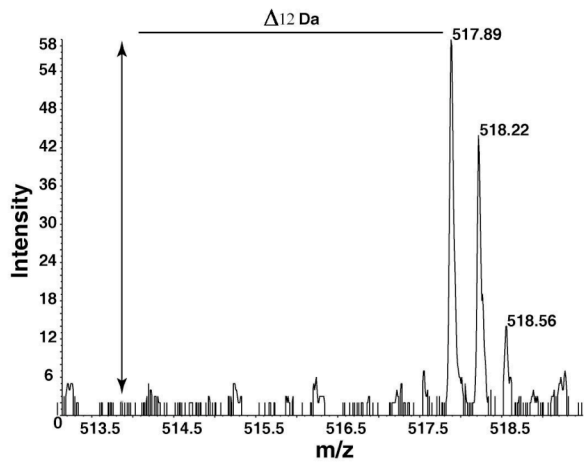

**FLRENpYYDSR\***

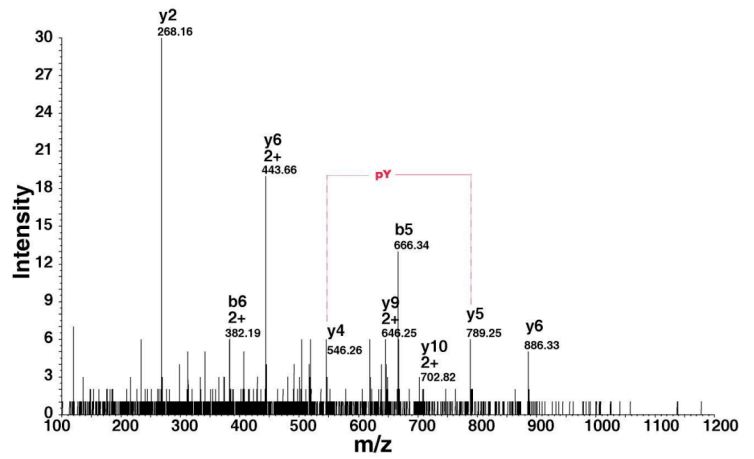

**DNA damage - binding protein 1**  
**TVPLpYESPR**

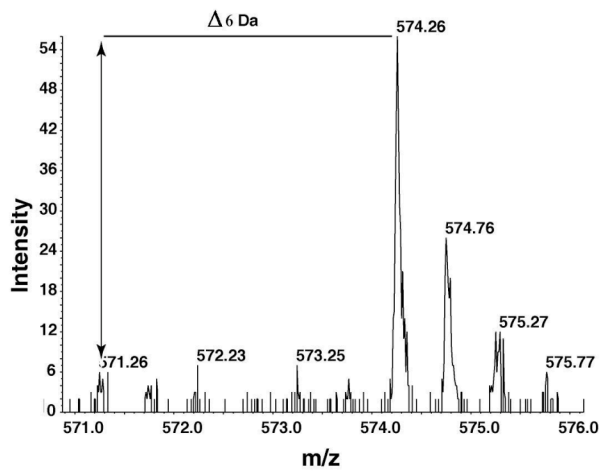

**TVPLpYESPR\***

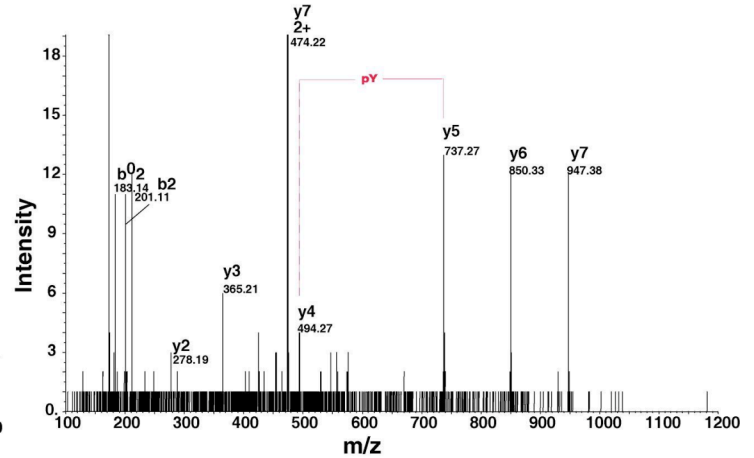

Supplement: NIHMS60500-supplement-Fig__S2.pdf [file NIHMS60500-supplement-Fig__S2.pdf]
