# Supplementary material
Source: PubMed Central journal article supplement (PMC2579752)
Supplement: NIHMS60500-supplement-Table_S1.pdf [file NIHMS60500-supplement-Table_S1.pdf]

|                                                                 |        |                                                                                                                                                                                                                                                                                                                 |                                                                                                                                        |                     |                  |                                                                                                                                                                                                                                    |                                                                                       |                  |                                                                                                                                      |                                                                                   |
|-----------------------------------------------------------------|--------|-----------------------------------------------------------------------------------------------------------------------------------------------------------------------------------------------------------------------------------------------------------------------------------------------------------------|----------------------------------------------------------------------------------------------------------------------------------------|---------------------|------------------|------------------------------------------------------------------------------------------------------------------------------------------------------------------------------------------------------------------------------------|---------------------------------------------------------------------------------------|------------------|--------------------------------------------------------------------------------------------------------------------------------------|-----------------------------------------------------------------------------------|
|                                                                 |        | L.KTY@VDPHTYEDPNQAVL.K<br>L.KTY@VDPHT@YEDPNQAVL.K<br>K.SEQLKPLKT@YVDPHTY@EDPNQAVL.K.F<br>K.TYVDPHTY@EDPNQAVL.K.F                                                                                                                                                                                                | Y589<br>Y589<br>Y595<br>Y595                                                                                                           | N                   | C                | 12<br>13<br>1,2,4,7,8,9,10<br>1,2,3,4,5,6,7,8,9,10                                                                                                                                                                                 | 1<br>1<br>8<br>2<br>8                                                                 | 26               | 3.14<br>2.90<br>4.21<br>3.13<br>3.77                                                                                                 | 2<br>2<br>3<br>3<br>2                                                             |
|                                                                 |        | L.KTYVDPHTY@EDPNQAVL.K<br>L.KTY@VDPHTY@EDPNQAVL.K<br>F.GLSRVLEDDPEATY@TTSGGKIPIR.W.T<br>L.SRVLEDDPEATY@TTSGGKIPIR.W.T<br>R.VLEDDPEATY@TTSGGK.I<br>R.VLEDDPEATY@TTSGGKIPIR.W                                                                                                                                     | Y595<br>Y589,Y595<br>Y773<br>Y773<br>Y773                                                                                              | N                   | C                | 11,13,15<br>12,14,16<br>12,13,14,15,16,18<br>11,12<br>2,3,4,6,8,10<br>1,2,3,4,6,7,8,9                                                                                                                                              | 3<br>3<br>6<br>2<br>6<br>9                                                            | 23               | 3.68<br>3.20<br>5.64<br>5.33<br>5.24<br>4.03                                                                                         | 2<br>2<br>3<br>3<br>2<br>2                                                        |
| Ephrin type-A receptor 3 precursor -- EphA3 (EphA4, EphA5)      | P29319 | R.VLEDDPEAAY@TTR.G                                                                                                                                                                                                                                                                                              | Y779                                                                                                                                   | N                   | U                | 2,3,4                                                                                                                                                                                                                              | 3                                                                                     | 3                | 3.33                                                                                                                                 | 2                                                                                 |
| Ephrin type-A receptor 4 precursor -- EphA4                     | Q03137 | Y.VDPFTY@EDPNQAVREF.A                                                                                                                                                                                                                                                                                           | Y602                                                                                                                                   | N                   | U                | 12,15                                                                                                                                                                                                                              | 2                                                                                     | 2                | 3.85                                                                                                                                 | 2                                                                                 |
| Ephrin type-A receptor 5 precursor -- EphA5                     | Q60629 | R.TY@IDPHTY@EDPNQAVHEFAK.E                                                                                                                                                                                                                                                                                      | Y489,Y495                                                                                                                              | N,N                 | U,U              | 2,3,4                                                                                                                                                                                                                              | 3                                                                                     | 3,3              | 3.83                                                                                                                                 | 3                                                                                 |
| Ephrin type-B receptor 2 precursor -- EphB2 (EphB1)             | P54763 | K.IY@IDPFTY@EDPNEAVR.E<br>Y.IDPFTY@EDPNEAVREF.A                                                                                                                                                                                                                                                                 | Y604,Y610<br>Y610                                                                                                                      | N,N                 | U,U              | 3<br>15,16,18                                                                                                                                                                                                                      | 1<br>3                                                                                | 1,4              | 2.32<br>4.59                                                                                                                         | 2<br>2                                                                            |
| Ephrin type-B receptor 3 precursor -- EphB3 (EphB4)             | P54754 | K.VY@IDPFTY@EDPNEAVR.E<br>K.VYIDPFTY@EDPNEAVR.E<br>R.FLEDDPSDPTY@TSSLGGKIPIR.W                                                                                                                                                                                                                                  | Y603,Y609<br>Y609<br>Y787                                                                                                              | N<br>N<br>N         | U<br>U<br>U      | 5<br>2,4,6,7,8,9,10<br>4,7                                                                                                                                                                                                         | 5<br>7<br>2                                                                           | 5<br>12<br>2     | 5.28<br>4.61<br>3.40                                                                                                                 | 2<br>2<br>3                                                                       |
| Eph receptor B4 -- EphB4                                        | Q91YM0 | K.HGQYLIGHGKTVY@IDPFTY@EDPNEAVR.E<br>K.HGQYLIGHGT*KVYIDPFTY@EDPNEAVR.E<br>Y.LIGHGKTVY@IDPFTY@EDPNEAVREF.A<br>R.FLEENSS@DPTY@TSSLGGKIPIR.W<br>R.FLEENSSDPTY@TSSLGGKIPIR.W                                                                                                                                        | Y590,Y596<br>Y596<br>Y590,Y596<br>Y774<br>Y774                                                                                         | N*<br>N*<br>N*<br>N | C<br>C<br>U<br>U | 2,3,4<br>3,4<br>11,12<br>4<br>1,3,4                                                                                                                                                                                                | 3<br>2<br>2<br>1<br>3                                                                 | 5<br>7<br>4<br>4 | 4.81<br>3.61<br>5.85<br>2.86<br>4.11                                                                                                 | 3<br>3<br>3<br>3<br>3                                                             |
| Hepatocyte growth factor receptor precursor -- MET              | P16056 | F.GLARDMYDKEY@Y.S<br>F.GLARDMYDKEY@Y.S<br>R.DM#YDKEY@Y@SVHNK.T<br>R.DM#YDKEY@YS@VHNK.T<br>R.DM#YDKEY@YSVHNK.T<br>R.DMYDKEY@Y@SVHNK.T<br><br>R.DMYDKEY@Y@SVHNKTGAK.L<br>R.DMYDKEY@YSVHNK.T<br><br>R.DMYDKEY@YSVHNKT*GAK.L<br>R.DMYDKEY@YS*VHNK.T<br>R.DMYDKEY@SVHNK.T<br><br>R.DMYDKEY@SVHNKT*GAK.L              | Y1232<br>Y1233<br>Y1232,Y1233<br>Y1232<br>Y1232<br>Y1232,Y1233<br><br>Y1232,Y1233<br>Y1232<br><br>Y1232<br>Y1232<br>Y1233<br><br>Y1233 | N<br>N              | U<br>U           | 15<br>12,18<br>3,8,10<br>6<br>8,10<br>1,3,8,9<br><br>9<br>1,2,3,4,5,6,7,8,9<br><br>9<br>8<br>3,7<br><br>8                                                                                                                          | 1<br>2<br>3<br>1<br>2<br>3<br><br>2<br>1<br>10<br><br>1<br>1<br>1<br>1<br>1<br>1      | 26<br>14         | 2.96<br>2.55<br>3.84<br>2.83<br>3.85<br>3.51<br>3.31<br>3.30<br>4.00<br>3.34<br>3.30<br>3.28<br>2.71<br>2.96<br>2.89                 | 3<br>2<br>3<br>3<br>3<br>3<br><br>2<br>3<br>3<br>3<br>2<br>3<br>2<br>3<br>2<br>3  |
| Insulin-like growth factor 1 receptor precursor -- IGF1R (InsR) | Q60751 | R.DIY@ETDY@Y@RK.G<br>R.DIY@ETDY@YRK.G<br>R.DIYETDY@YR.K<br>R.DIYETDY@YRK.G                                                                                                                                                                                                                                      | Y1163,<br>Y1167,Y1168<br>Y1163, Y1167<br>Y1167<br>Y1168                                                                                | N<br>N              | U<br>U           | 8<br>8<br>2,3,6,8,10<br>8                                                                                                                                                                                                          | 1<br>1<br>5<br>1                                                                      | 2<br>7<br>2      | 2.45<br>2.74<br>2.27<br>2.42                                                                                                         | 2<br>2<br>2<br>2                                                                  |
| Proto-oncogene tyrosine-protein kinase -- MER                   | Q60805 | K.KIY@SGDY@YR.Q<br>K.KIYSGDY@YR.Q                                                                                                                                                                                                                                                                               | Y744,Y748<br>Y748                                                                                                                      | N<br>N              | U<br>U           | 3<br>3                                                                                                                                                                                                                             | 1<br>1                                                                                | 1<br>2           | 2.41<br>2.52                                                                                                                         | 2<br>2                                                                            |
| Tyrosine-protein kinase receptor UFO precursor -- Axl           | Q00993 | F.GLSKKIYNGDY@YR<br>K.KIYNGDY@YR.Q<br>K.IYNGDY@YR.Q<br>K.IYNGDY@YR.Q<br>F.GLSKKIYNGDY@YR                                                                                                                                                                                                                        | Y696<br>Y696<br>Y696<br>Y697<br>Y697                                                                                                   | N*<br>N             | C<br>U           | 11,12<br>1,2,3,4,5,6,7,8,9,10<br>1,3,4,5,6,7,8,9,10<br>4<br>13                                                                                                                                                                     | 2<br>11<br>11<br>1<br>1                                                               | 24<br>2          | 3.57<br>2.94<br>2.83<br>2.08<br>3.21                                                                                                 | 2<br>2<br>2<br>2<br>2                                                             |
| <b>Other protein kinases</b>                                    |        |                                                                                                                                                                                                                                                                                                                 |                                                                                                                                        |                     |                  |                                                                                                                                                                                                                                    |                                                                                       |                  |                                                                                                                                      |                                                                                   |
| CDC2: Cell division control protein 2 homolog - CDK1 (CDK2)     | P11440 | K.IEKIGEGT@Y@GVVYK.G<br><br>K.IEKIGEGTY@GVVYK<br>K.IEKIGEGTY@GVVYK.G<br><br>K.IEKIGEGT*Y@GVVYK.G<br><br>K.IGEGT@Y@GVVYK.G<br>K.IGEGTY@GVVYK.G<br><br>K.IGEGTY@GVVYKGR.H<br>K.IGEGT*Y@GVVYK.G<br>K.IGEGT*Y@GVVYKGR.H<br>Y.IKIEKIGEGTY@GVVYK<br>Y.IKIEKIGEGT*Y@GVVYK<br>-.DYIKIEKIGEGTY@GVVYK<br>K.IGEGTYGVVY@K.G | Y15<br><br>Y15<br>Y15<br><br>Y15<br>Y15<br><br>Y15<br>Y15<br><br>Y15<br>Y15<br>Y15<br>Y15<br>Y15<br>Y15<br>Y19                         | N                   | C                | 1,3,4,6,8,9,10<br><br>11,16<br>1,2,3,4,5,7,8,9<br><br>3,5,6,7,8,9,10<br><br>1,2,3,4,5,6,7,10<br>1,2,3,4,5,6,7,8,9,10<br><br>1,2,3,4,5,6,8<br>1,2,3,4,5,6,7,8,9,10<br>2,3,4<br>11,12,13,15,16,18<br>11<br>11,12,13,14,15,16,18<br>9 | 3<br>7<br>2<br>7<br>11<br>3<br>4<br>10<br>38<br>1<br>9<br>20<br>3<br>6<br>1<br>7<br>1 | 132              | 3.31<br>4.05<br>3.21<br>4.35<br>4.12<br>3.96<br>3.69<br>3.05<br>3.45<br>1.85<br>3.99<br>3.34<br>2.93<br>3.96<br>2.76<br>4.13<br>2.76 | 3<br>2<br>2<br>3<br>2<br>3<br>2<br>2<br>2<br>1<br>2<br>2<br>2<br>2<br>2<br>2<br>2 |
| Cell division protein kinase 2 -- CDK2                          | P97377 | K.VEKIGEGTY@GVVYK.A                                                                                                                                                                                                                                                                                             | Y15                                                                                                                                    | N                   | U                | 1,4,6                                                                                                                                                                                                                              | 2<br>1                                                                                | 3                | 3.37<br>3.39                                                                                                                         | 3<br>2                                                                            |



|                                                                                                    |        |                                                                                                                                                                                                                                                                       |                                                                          |         |   |                                                                                                          |                                                  |    |                                                                              |                                                |
|----------------------------------------------------------------------------------------------------|--------|-----------------------------------------------------------------------------------------------------------------------------------------------------------------------------------------------------------------------------------------------------------------------|--------------------------------------------------------------------------|---------|---|----------------------------------------------------------------------------------------------------------|--------------------------------------------------|----|------------------------------------------------------------------------------|------------------------------------------------|
| Serine/threonine-protein kinase PAK 2                                                              | Q8CIN4 | K.LRTIVSIGDPKKYTRY@EK.I                                                                                                                                                                                                                                               | Y252                                                                     | N*      | U | 5                                                                                                        | 1                                                | 1  | 2.50                                                                         | 3                                              |
| Serine/threonine-protein kinase -- PFTAIRE-1                                                       | Q35495 | K.LEKLEGGES@Y@ATVYK.G                                                                                                                                                                                                                                                 | Y146                                                                     | N*      | U | 4                                                                                                        | 1                                                | 1  | 3.89                                                                         | 2                                              |
| Serine/threonine-protein kinase -- PCTAIRE-3                                                       | Q04899 | K.LDKLGEPTY@ATVFK.G                                                                                                                                                                                                                                                   | Y132                                                                     | N*      | U | 2                                                                                                        | 1                                                | 1  | 2.78                                                                         | 3                                              |
| Serine/threonine-protein kinase -- PRP4                                                            | Q61136 | C.DFGS@AS@HVADNDITPY@LVSRFY.R<br>F.GSASHVADNDITPY@LVSRFY.R<br>F.GSASHVADNDITPY@LVSRFY.R<br>H.VADNDITPY@LVSRFY.R<br>H.VADNDITPY@LVSRFY.R<br>K.LC*DFGSASHVADNDITPY@LVSR.F<br><br>K.LCDFGSAS@HVADNDITPY@LVSR.F<br>L.C*DFGSASHVADNDITPY@LVSRFY.R<br>S.HVADNDITPY@LVSRFY.R | Y849<br>Y849<br>Y849<br>Y849<br>Y849<br>Y849<br><br>Y849<br>Y849<br>Y849 | N       | C | 16<br>13,14<br>14<br>11,12,13,15,16,18<br>11,12,15,16,18<br>1,2,3,4,5,6,7,8,9,10<br><br>1<br>13,15<br>16 | 1<br>2<br>1<br>6<br>6<br>16<br>10<br>1<br>2<br>1 | 46 | 3.25<br>4.38<br>4.78<br>4.14<br>4.78<br>6.43<br>5.41<br>4.60<br>4.11<br>2.85 | 3<br>2<br>2<br>2<br>2<br>3<br>2<br>3<br>3<br>2 |
| RIKEN CDNA C230081A13: hypothetical Protein kinase A anchoring domain containing protein -- SgK269 | Q8BX56 | K.FNSYNNAGM#PPFPIIHDEPSY@AR.S<br>K.NAIKVPIVINPNAY@DNLAIK.S<br>K.NAIKVPIVINPNAY@DNLAIK.S<br><br>K.NAIKVPIVINPNAYDNLAIK.S<br>K.VPIVINPNAY@DNLAIK.S                                                                                                                      | Y613<br>Y632,Y638<br>Y632<br><br>Y638<br>Y632                            | N*      | U | 10<br>1,2,3,4<br>1,2,3,4<br><br>3<br>1,3,4                                                               | 1<br>4<br>3<br>3<br>1<br>3                       | 1  | 3.40<br>4.89<br>5.59<br>4.64<br>4.79<br>5.03                                 | 3<br>3<br>3<br>2<br>3<br>2                     |
| <b>Protein phosphatases</b>                                                                        |        |                                                                                                                                                                                                                                                                       |                                                                          |         |   |                                                                                                          |                                                  |    |                                                                              |                                                |
| Protein phosphatase 2 regulatory subunit B56 delta isoform                                         | Q99PC9 | R.KSELPOQVY@T*IK.A                                                                                                                                                                                                                                                    | Y572                                                                     | N*      | C | 4,8,10                                                                                                   | 4                                                | 4  | 3.10                                                                         | 2                                              |
| Receptor-type tyrosine-protein phosphatase alpha -- R-PTP-alpha                                    | P18052 | K.VVQEYIDAFSDY@ANFK.-<br><br>Y.IDAFSDY@ANFK.-<br>Y.KVVQEYIDAFSDY@ANFK<br>Y.KVVQEYIDAFSDY@ANFK.-                                                                                                                                                                       | Y825<br><br>Y825<br>Y825<br>Y825                                         | N       | U | 1,2,3,4,5,7,9,10<br><br>11<br>11<br>11,12,13,15,16,18                                                    | 4<br>12<br>1<br>2<br>5<br>4                      | 28 | 3.79<br>6.22<br>2.65<br>4.57<br>5.88<br>4.55                                 | 3<br>2<br>2<br>2<br>2<br>3                     |
| Tyrosine-protein phosphatase, non-receptor type 11 -- SHP-2                                        | P35235 | H.IKIQNTGDY@YDLY.G<br>K.IQNTGDY@YDLYGGEK.F<br>R.EDSARVY@ENVGLMQQR.S<br>R.VY@ENVGLMQQR.S                                                                                                                                                                               | Y62<br>Y62<br>Y584<br>Y584                                               | N       | C | 11,16<br>3,4,6,7,8,10<br>3<br>4                                                                          | 2<br>7<br>1<br>1                                 | 9  | 3.20<br>4.29<br>3.30<br>3.02                                                 | 2<br>2<br>3<br>2                               |
| <b>SIGNALING: SMALL G PROTEINS AND REGULATORS</b>                                                  |        |                                                                                                                                                                                                                                                                       |                                                                          |         |   |                                                                                                          |                                                  |    |                                                                              |                                                |
| Glucocorticoid receptor DNA binding factor 1 [fragment] -- p190RhoGAP                              | Q91YM2 | R.NEEENIY@SVPHDSTQK.I<br><br>W.MPOQDGFDPDSY@AEPMDAVKPRNEENIY.S                                                                                                                                                                                                        | Y943<br><br>Y925                                                         | N       | C | 1,2,3,4,5,6,7,8,9,10<br><br>11                                                                           | 14<br>14<br>1                                    | 28 | 3.49<br>5.15<br>4.11                                                         | 3<br>2<br>3                                    |
| Breast cancer anti-estrogen resistance protein 3 -- BCAR3                                          | Q9QZK2 | F.IFRDPY@LLDPTLEY.V<br>F.IFRDPY@LLDPTLEYVKF.S<br>Y.LLDPTLEY@VKF.S<br>R.KGENFIFRDPY@LLDPTLEY@VK.F<br>R.KGENFIFRDPY@LLDPTLEYVK.F<br>L.RLSEAY@SRVQY.Q                                                                                                                    | Y103<br>Y103<br>Y111<br>Y103,Y111<br>Y103<br>Y206                        | Y<br>N* | U | 11<br>11<br>11<br>4<br>2,4,5,7<br>11,12,13                                                               | 1<br>1<br>1<br>1<br>4<br>3                       | 7  | 3.51<br>3.60<br>3.16<br>2.80<br>4.09<br>3.27                                 | 2<br>2<br>2<br>3<br>3<br>2                     |
| ARF GTPase-activating protein -- GIT1                                                              | Q68FF6 | R.SQSELDDQHDY@DS@VAS@DEDTDQEPLPSAG<br>ATR.N<br><br>R.SQSELDDQHDY@DS@VAS*DEDTDQEPLPSAG<br>TR.N<br>F.HSTELEDDAIY@SVHVPAGLYR<br>R.LQPFHS@TELEDDAIY@SVHVPAGLYR.I<br>R.LQPFHSTELEDDAIY@SVHVPAGLYR.I<br>R.LQPFHSTELEDDAIY@SVHVPAGLYR.I                                      | Y392<br><br>Y392<br>Y554<br>Y554<br>Y554                                 | Y       | U | 8,9<br><br>8,9<br>11,12,13,15,16,18<br>7<br>1,2,3,4,5,7,9,10<br>7                                        | 2<br><br>2<br>6<br>1<br>9<br>1                   | 4  | 4.87<br><br>5.47<br>5.28<br>3.89<br>6.25<br>3.60                             | 3<br><br>3<br>3<br>3<br>3<br>3                 |
| ARF GTPase-activating protein -- GIT2                                                              | Q9JLQ2 | K.QNSTPESDY@DNTAC*DPEPDDTGSTR.K<br>K.QNSTPESDY@DNTAC*DPEPDDTGSTR.K                                                                                                                                                                                                    | Y541<br>Y541                                                             | N       | U | 2,4,6<br>3                                                                                               | 3<br>1                                           | 4  | 4.92<br>3.17                                                                 | 3<br>3                                         |
| Ras GTPase-activating-like protein -- IQGAP1                                                       | Q9JKF1 | K.LQQTY@SALNSK.A                                                                                                                                                                                                                                                      | Y1510                                                                    | N       | C | 3                                                                                                        | 1                                                | 1  | 2.29                                                                         | 2                                              |
| Ras and Rab interactor 1 -- Rin1                                                                   | Q921Q7 | K.EKPSTDPLY@DTPDTR.G                                                                                                                                                                                                                                                  | Y35                                                                      | N       | C | 4,7,9                                                                                                    | 4                                                | 4  | 2.61                                                                         | 2                                              |
| Rho-GTPase-activating protein 12                                                                   | Q8C0D4 | M.RATT@PPNQGRPDS@PVY@ANLQEL.K<br>M.RATT@PPNQGRPDS@PVY@ANLQEL.K<br>R.AT@TPPNQGRPDS@PVY@ANLQEL.K<br>R.AT@TPPNQGRPDS@PVY@ANLQEL.K<br>R.ATT@PPNQGRPDS@PVY@ANLQEL.K                                                                                                        | Y241<br>Y241<br>Y241<br>Y241<br>Y241                                     | N       | C | 15,16<br>13<br>4<br>4<br>2,3,4,6,7,8,9,10                                                                | 2<br>1<br>1<br>1<br>9                            | 14 | 3.39<br>3.16<br>3.86<br>2.70<br>4.44                                         | 3<br>3<br>3<br>3<br>3                          |
| <b>SIGNALING: OTHER</b>                                                                            |        |                                                                                                                                                                                                                                                                       |                                                                          |         |   |                                                                                                          |                                                  |    |                                                                              |                                                |
| Abl interactor 1 -- Abi-1                                                                          | Q8CBW3 | K.TLEPVKPTVPNDY@MTSPAR.L                                                                                                                                                                                                                                              | Y212                                                                     | N       | U | 4                                                                                                        | 1                                                | 7  | 2.82                                                                         | 3                                              |

|                                                               |        |                                                                                                                                                                                                                                                                                      |                                                                      |                                      |                                      |                                                                                                                                          |                                                   |                                                                      |                                           |
|---------------------------------------------------------------|--------|--------------------------------------------------------------------------------------------------------------------------------------------------------------------------------------------------------------------------------------------------------------------------------------|----------------------------------------------------------------------|--------------------------------------|--------------------------------------|------------------------------------------------------------------------------------------------------------------------------------------|---------------------------------------------------|----------------------------------------------------------------------|-------------------------------------------|
|                                                               |        | R.NTPY@KTLEPVKPTVPNDY@MTSPAR.L<br>R.NTPYKT@LEPVKPTVPNDY@MTSPAR.L<br>Y.KTLEPVKPTVPNDY@MTSPAR.L.G                                                                                                                                                                                      | Y212<br>Y212<br>Y212                                                 |                                      |                                      | 4,7<br>2<br>12,13                                                                                                                        | 1<br>2<br>1<br>2                                  | 4.25<br>3.70<br>3.12<br>4.57                                         | 2<br>3<br>3<br>3                          |
| Annexin A2                                                    | P07356 | K.LSLEGDHSTPPSAY@GSVKPYTNFDAER.D<br>K.LSLEGDHSTPPSAY@GSVKPYTNFDAERDALNIET<br>AVK.T<br>C.KLSLEGDHSTPPSAY@GSVKPY.T<br>L.SLEGDHSTPPSAY@GSVKPY.T<br>K.RKY@GKSLYYIQQDTK.G                                                                                                                 | Y23<br>Y23<br>Y23<br>Y310                                            | N<br>N<br>N<br>N*                    | C<br>C<br>C<br>U                     | 1,3,4<br>4<br>12,13<br>11,12,13,16<br>4,10                                                                                               | 3<br>1<br>2<br>2<br>2                             | 13<br>4.73<br>3.66<br>4.45<br>4.27<br>2.62                           | 3<br>3<br>3<br>2<br>3                     |
| Ankyrin repeat and SAM domain-containing protein 1 -- ANKS1   | P59672 | L.AVRPRIQS@SAPQEEEEHPY@ELL.L<br>L.AVRPRIQS@SAPQEEEEHPY@ELL.L<br>L.AVRPRIQSSAPQEEEEHPY@ELL.L<br>L.AVRPRIQSSAPQEEEEHPY@ELL.L<br>L.AVRPRIQSSAPQEEEEHPY@ELL.L                                                                                                                            | Y471<br>Y471<br>Y471<br>Y471<br>Y471                                 | N*                                   | C                                    | 11<br>16<br>11,13,15<br>12<br>11                                                                                                         | 1<br>1<br>3<br>1<br>1                             | 7<br>3.66<br>4.43<br>3.98<br>3.69<br>3.16                            | 3<br>3<br>3<br>3<br>3                     |
| Calmodulin                                                    | P62204 | R.VFDKDGNGY@ISAAELR.H<br>F.RVFDKDGNGY@ISAAELR                                                                                                                                                                                                                                        | Y99<br>Y99                                                           | N                                    | U                                    | 2,3,4<br>11                                                                                                                              | 5<br>1                                            | 6<br>5.06<br>3.65                                                    | 2<br>2                                    |
| Caveolin-1                                                    | P49817 | K.YVDSEGHLY@TVPIR.E                                                                                                                                                                                                                                                                  | Y14                                                                  | N                                    | C                                    | 1,2,3,4,6,8,9                                                                                                                            | 7                                                 | 7<br>3.91                                                            | 2                                         |
| Caveolin-2                                                    | Q9WVC3 | F.MADDAYS@HHS@GVDY@ADPEKY.V<br>F.MADDAYS@HHS*GVDY@ADPEKY.V<br>F.MADDAYSHHS@GVDY@ADPEKY.V<br>F.MADDAYSHHS@GVDY@ADPEKY.V<br>F.MADDAYS*HHS@GVDY@ADPEKY.V<br>Y.SHHS@GVDY@ADPEKY.V                                                                                                        | Y27<br>Y27<br>Y27<br>Y27<br>Y27<br>Y27                               | N<br>N<br>N<br>N<br>N                | U<br>U<br>U<br>U<br>U                | 11,12,15<br>11<br>11,12,16<br>11<br>12<br>11                                                                                             | 3<br>1<br>3<br>1<br>1<br>1                        | 10<br>4.14<br>3.23<br>3.62<br>3.60<br>4.00<br>4.16                   | 3<br>3<br>3<br>3<br>3<br>3                |
| Proto-oncogene c-Crk                                          | Q64010 | L.IGNGEQSHQPQLGGPEPGPY@AQPSVN.T<br>Y.AQPSVNTPLPNLQNGPIY@ARVIQ.K<br>K.RVFNAY@DKTALALEVGLVK.V<br>Q.KRVFNAY@DKTALA                                                                                                                                                                      | Y221<br>Y239<br>Y251<br>Y251                                         | N<br>N<br>N*                         | U<br>U<br>C                          | 11,12<br>11,13,18<br>3<br>11                                                                                                             | 2<br>3<br>1<br>1                                  | 2<br>3<br>2<br>2.56                                                  | 3<br>3<br>3<br>3                          |
| Crk-like protein                                              | P47941 | Y.VRTLY@DFPGNDAEDLPF.K<br>H.GKHGNRNS@NSY@GIPEPAHAY.A<br>H.GNRNS@NSY@GIPEPAHAY.A<br>H.GNRNSNSY@GIPEPAHAY.A<br>R.NSNSY@GIPEPAHAYAQPTTTPLPTVASTPGAAL<br>NPLPSTQNGPVFAK.A<br>R.NSNSYGIPEPAHAY@AQPTTTPLPTVASTPGAAL<br>NPLPSTQNGPVFAK.A                                                    | Y132<br>Y198<br>Y198<br>Y198<br>Y198<br>Y207                         | N*<br>N*<br>N<br>N<br>N              | U<br>U<br>U<br>U<br>U                | 16<br>11<br>11,12,13<br>13<br>3,4,7<br>1,2,5,9                                                                                           | 1<br>1<br>3<br>1<br>3<br>5                        | 1<br>8<br>3.40<br>3.26<br>5.00<br>5.30                               | 2<br>3<br>2<br>2<br>3<br>3                |
| Docking protein 1 (Dok1)                                      | P97465 | R.IPPGPSQDSVY@SDPLGSTPAGAGEGVHSK.K<br>K.KPLYWDLY@GHVQQQLL.T<br>K.LTDSKEDIY@DEPEGLAPAPPR.G<br>K.TKLTDSKEDIY@DEPEGLAPAPPR.G<br>L.KTKLTDSKEDIY@DEPEGLAPAPPRGLY.D<br>L.LKTKLTDSKEDIY@DEPEGLAPAPPRGLY.D<br>R.LKEEGYELPYNPATDDY@AVPPR.S<br>F.SSDTALY@SQVQKSGTSGAW.D<br>K.GFSSDTALY@SQVQK.S | Y314<br>Y340<br>Y361<br>Y361<br>Y361<br>Y361<br>Y408<br>Y450<br>Y450 | N<br>N<br>N<br>N<br>N<br>N<br>N<br>N | C<br>C<br>C<br>C<br>C<br>C<br>C<br>C | 2,4,7<br>2,3,4<br>1,2,3,4,5,6,7,8,9,10<br>1,2,3,4,5,6,7,8,9,10<br>11,13,15<br>11,12,13,14,15,16,17,18<br>1,2,3,4,6,7,8,9,10<br>12<br>3,4 | 4<br>3<br>17<br>7<br>18<br>4<br>8<br>12<br>1<br>2 | 4<br>3<br>54<br>4.73<br>5.71<br>5.13<br>5.23<br>4.42<br>4.91<br>4.42 | 3<br>3<br>3<br>2<br>3<br>3<br>3<br>2<br>2 |
| Ephrin-B2 precursor (Ephrin-B1)                               | P52800 | R.TADSVFC*PHY@EK.V<br>K.VSGDY@GHPVYIVQEMPPQSPANIYYKV.-<br>K.VSGDYGHPVY@IVQEMPPQSPANIY@YKV.-<br>K.VSGDYGHPVYIVQEM#PPQSPANIY@YKV.-<br>K.VSGDYGHPVYIVQEMPPQSPANIY@YKV.-                                                                                                                 | Y307<br>Y314<br>Y319,Y333<br>Y333<br>Y333                            | N<br>N<br>N<br>N                     | U<br>U<br>U<br>U                     | 2,3,4,8<br>2<br>4<br>3,4,10<br>1,2,3,4,7,9                                                                                               | 4<br>1<br>2<br>3<br>9                             | 4<br>1<br>2<br>14<br>5.09                                            | 2<br>3<br>3<br>3<br>3                     |
| Fibroblast growth factor receptor substrate 2 -- FRS2         | Q8C180 | K.LVY@ENINGLSIPSASGVR.R<br>R.RPALLNY@ENLPSLPPWEAR.K                                                                                                                                                                                                                                  | Y306<br>Y349                                                         | N<br>N                               | U<br>U                               | 3<br>2                                                                                                                                   | 1<br>1                                            | 1<br>2<br>3.94<br>3.09                                               | 2<br>3                                    |
| Fish protein -- TKS5                                          | O89032 | K.VKYEEPEY@DVPAFGDFDSEPEMNEEPSGDR.G                                                                                                                                                                                                                                                  | Y557                                                                 | N*                                   | U                                    | 9                                                                                                                                        | 1                                                 | 1<br>4.99                                                            | 3                                         |
| GRB2-associated binding protein 1 -- Gab1                     | Q9QYY0 | K.HGMNGFFQQQMMY@DC*PPSR.L<br>K.DASSQDC*Y@DIPR.T<br>L.RKDASSQDC*Y@DIPR.T.F<br>N.KLRKDASSQDC*Y@DIPR.T.F<br>R.KDASSQDC*Y@DIPR.T                                                                                                                                                         | Y242<br>Y407<br>Y407<br>Y407<br>Y407                                 | N<br>N<br>N<br>N                     | U<br>U<br>U<br>U                     | 1,3<br>1,2,3,4,5,6,8,9<br>11,13<br>11<br>1,2,3                                                                                           | 2<br>10<br>2<br>1<br>2<br>2                       | 2<br>17<br>4.09<br>2.80<br>3.66<br>3.56                              | 3<br>2<br>3<br>3<br>3<br>2                |
| Insulin receptor substrate 2 -- IRS-2                         | P81122 | K.SSSNLGADDGY@MPM#TPGAALR.S<br>K.SSSNLGADDGY@MPMTPGAALR.S<br>K.SDDY@MPMSPTSVSAPK.Q                                                                                                                                                                                                   | Y649<br>Y649<br>Y671                                                 | N<br>N<br>N                          | U<br>U<br>U                          | 3<br>2,3,8<br>2                                                                                                                          | 1<br>3<br>1                                       | 4<br>5.04<br>3.12                                                    | 2<br>2<br>2                               |
| Insulin receptor substrate-2 (IRS-2) (4PS) homolog [Fragment] | Q3U2I0 | R.SYKAPC*SC*SGDDDDQY@VLMSSPVGR.I                                                                                                                                                                                                                                                     | Y754                                                                 | Y                                    | U                                    | 1,2,3,4,6,7                                                                                                                              | 6                                                 | 6<br>5.28                                                            | 3                                         |
| Kin of IRRE-like protein 1 precursor                          | Q80W68 | K.AIY@SSFKDDVDLK.Q<br>K.AIY@SSFKDDVDLKQDLR.C                                                                                                                                                                                                                                         | Y604<br>Y604                                                         | N*                                   | U                                    | 3,4<br>3                                                                                                                                 | 2<br>1                                            | 3<br>4.07<br>3.54                                                    | 2<br>3                                    |

|                                                                             |          |                                                                                                                                                                                                                                                                                                                                                                                                                                                                                                                                                      |                                                                                                                                                      |                                                                  |                                                                 |                                                                                                                                                              |                                                                                             |                                                                                                                 |                                                                                                                                                              |                                                                                                  |
|-----------------------------------------------------------------------------|----------|------------------------------------------------------------------------------------------------------------------------------------------------------------------------------------------------------------------------------------------------------------------------------------------------------------------------------------------------------------------------------------------------------------------------------------------------------------------------------------------------------------------------------------------------------|------------------------------------------------------------------------------------------------------------------------------------------------------|------------------------------------------------------------------|-----------------------------------------------------------------|--------------------------------------------------------------------------------------------------------------------------------------------------------------|---------------------------------------------------------------------------------------------|-----------------------------------------------------------------------------------------------------------------|--------------------------------------------------------------------------------------------------------------------------------------------------------------|--------------------------------------------------------------------------------------------------|
|                                                                             |          | R.EEYEMKDPNTNGY@YNNR.A<br>R.AVLY@ADY@RAPGPTR.F<br>Y.NVRAHEDRPSSRAVLY@ADY.R<br>R.TPY@EAYDPIGK.Y<br>Y.RLGYPOAPPSSLERTPY@EAYDPIGKY.A<br>R.TPYEAY@DPIGK.Y                                                                                                                                                                                                                                                                                                                                                                                                | Y637<br>Y654,Y657<br>Y654<br>Y753<br>Y753<br>Y756                                                                                                    | N*<br>N<br>N<br>N*<br>N<br>N                                     | C<br>U<br>U<br>C<br>C<br>C                                      | 8<br>3<br>11<br>4<br>11<br>1,2,3,4,6,7,8                                                                                                                     | 1<br>2<br>1<br>1<br>1<br>8                                                                  | 1<br>2<br>3<br>2<br>2<br>8                                                                                      | 3.65<br>2.76<br>2.73<br>2.57<br>4.26<br>3.31                                                                                                                 | 3<br>3<br>3<br>2<br>3<br>2                                                                       |
| myelin protein zero-like 1 -- PZR                                           | Q3TEW6   | K.SPSSAGSHQGPVIV@AQLDHSGGHSHGK.I<br>K.INKSESVVY@ADIR.K<br><br>K.INKSESVVY@ADIRK.D-<br>K.SESVVY@ADIR.K<br>N.KSESVVY@ADIRK.D-<br>H.SGKINKSESVVY@ADIRK.D-                                                                                                                                                                                                                                                                                                                                                                                               | Y242<br>Y264<br><br>Y264<br>Y264<br>Y264<br>Y264                                                                                                     | N<br>N<br><br>N<br>N<br>N                                        | U<br>U<br><br>U<br>U<br>U                                       | 3<br>2,3,4<br><br>3<br>2,3<br>11,12<br>11                                                                                                                    | 1<br>1<br>3<br>1<br>3<br>2<br>1                                                             | 1<br>11<br><br>1<br>2<br>2<br>1                                                                                 | 2.84<br>3.20<br>3.74<br>3.66<br>2.39<br>3.13<br>4.99                                                                                                         | 3<br>3<br>2<br>3<br>2<br>3<br>3                                                                  |
| Non-catalytic region of tyrosine kinase adaptor protein 1 -- NCK1           | Q99M51   | K.RKPS@VPDTASPADDSFVDPGERLY@DLNM#PAF.VK.F<br>K.RKPS@VPDTASPADDSFVDPGERLY@DLNMPAF.VK.F<br>K.RKPSVPDTASPADDSFVDPGERLY@DLNMPAF.VK.F                                                                                                                                                                                                                                                                                                                                                                                                                     | Y105<br>Y105<br>Y105                                                                                                                                 | N<br><br>N                                                       | C<br><br>C                                                      | 10<br>9<br>7,9                                                                                                                                               | 1<br>1<br>2                                                                                 | 4<br><br>2                                                                                                      | 4.25<br>4.82<br>4.10                                                                                                                                         | 3<br>3<br>3                                                                                      |
| PDZ and LIM domain protein 5                                                | Q8CI51   | R.NTEFY@HIPHSDASK.K                                                                                                                                                                                                                                                                                                                                                                                                                                                                                                                                  | Y251                                                                                                                                                 | N                                                                | U                                                               | 8                                                                                                                                                            | 1                                                                                           | 1                                                                                                               | 2.61                                                                                                                                                         | 3                                                                                                |
| Phosphatidylinositol 3-kinase regulatory alpha subunit -- p85alpha          | P26450   | K.SREYDRLY@EEYTR.T<br>R.DOY@LMWLTQK.G<br>K.LNEWLGNENTEDQY@SLVEDDEDLPHHDEK.T                                                                                                                                                                                                                                                                                                                                                                                                                                                                          | Y467<br>Y580<br>Y607                                                                                                                                 | N<br>N<br>N                                                      | C<br>U<br>C                                                     | 3,4,8,9<br>4<br>4                                                                                                                                            | 4<br>1<br>1                                                                                 | 4<br>1<br>1                                                                                                     | 3.69<br>2.14<br>5.07                                                                                                                                         | 3<br>2<br>3                                                                                      |
| Phosphatidylinositol 3-kinase, regulatory subunit, polypeptide 2 -- p85beta | O08908   | R.EYDQLY@EEYTR.T                                                                                                                                                                                                                                                                                                                                                                                                                                                                                                                                     | Y458                                                                                                                                                 | N                                                                | C                                                               | 7,8                                                                                                                                                          | 2                                                                                           | 2                                                                                                               | 3.14                                                                                                                                                         | 2                                                                                                |
| Protein LAP2                                                                | Q80TH2   | R.RTEGDY@LSYR.E<br>R.TEGDY@LSYR.E                                                                                                                                                                                                                                                                                                                                                                                                                                                                                                                    | Y1097<br>Y1097                                                                                                                                       | N                                                                | U                                                               | 1,2,3,4,5,6,8,9<br>2,3,6,9                                                                                                                                   | 9<br>4                                                                                      | 13                                                                                                              | 3.28<br>2.56                                                                                                                                                 | 2<br>2                                                                                           |
| SH2 domain-containing adapter protein B -- Shb                              | Q6PD21   | C.RLDY@C*GGGGGGDPGGGQRAF.T<br>L.RAMC*RLDY@C*GGGGGGDPGGGQRAF.T<br>M.C*RLDY@C*GGGGGGDPGGGQRAF.T<br>R.LDY@C*GGGGGGDPGGGQRAF.T<br>K.C*SAEETGAGQDKVTIADDDY@SDPFDAK.S<br>K.DKVTIADDDY@SDPFDAK.S<br><br>K.VTIADDDY@SDPFDAK.S<br>L.LNKC*SAEETGAGQDKVTIADDDY@SDPF.D<br>F.DAKSDLKSKAGKGESAGY@MEPYE<br>F.DAKSDLKSKAGKGESAGY@MEPYE<br>K.AGKGESAGY@MEPYEAQR.I<br>K.AGKGESAGY@MEPYEAQR.I<br><br>K.GESAGY@MEPYEAQR.I<br>K.SKAGKGESAGY@MEPYEAQR.I<br>L.KSKAGKGESAGY@MEPYE<br>K.LPQDDDRPADEY@DQPWEWNR.V<br>L.RLRESKLPQDDDRPADEY@DQPWE<br>R.ESKLPQDDDRPADEY@DQPWEWNR.V | Y113<br>Y113<br>Y113<br>Y113<br>Y240<br>Y240<br><br>Y240<br>Y240<br>Y262<br>Y262<br>Y262<br>Y262<br><br>Y262<br>Y262<br>Y262<br>Y330<br>Y330<br>Y330 | N<br><br><br><br>N<br><br><br><br><br><br><br><br><br><br><br>N* | U<br><br><br><br>U<br><br><br><br><br><br><br><br><br><br><br>U | 11,12,15<br>12<br>11,12,15<br>5,6,8,9<br>4,6,9<br>3,4,6,7,8<br><br>3,4,8<br>11,16,18<br>11<br>11<br>8,10<br>1,2,3,4,8<br><br>2,3,4<br>3<br>11<br>2,3,4<br>11 | 3<br>1<br>3<br>4<br>3<br>3<br>4<br>3<br>3<br>1<br>2<br>1<br>5<br>3<br>1<br>1<br>3<br>1<br>5 | 11<br><br><br><br>16<br><br><br><br><br><br><br><br><br><br><br>15<br><br><br><br><br><br><br><br><br><br><br>9 | 4.74<br>3.07<br>5.18<br>5.16<br>4.50<br>4.69<br>4.96<br>4.12<br>3.30<br>3.28<br>2.86<br>4.11<br>3.89<br>4.83<br>3.97<br>2.85<br>3.22<br>5.05<br>3.70<br>3.99 | 3<br>3<br>3<br>2<br>3<br>3<br>3<br>2<br>3<br>3<br>3<br>3<br>2<br>3<br>3<br>2<br>3<br>3<br>3<br>3 |
| SHC transforming protein 1 -- SHC1                                          | P98083   | K.QM#LPPPPC*PGRELFDDPSY@VNIQNLDK.A<br>R.ELFDDPSY@VNIQNLDK.A<br>K.QMLPPPRCPGRELFDDPSY@VNIQNLDK.A<br>R.KQMLPPPRCPGRELFDDPSY@VNIQNLDK.A<br>R.MAGFDGSAWDEEEEEPPDHQY@Y@NDFPGKEP.PLGGVDMR.L<br>R.MAGFDGSAWDEEEEEPPDHQY@Y@NDFPGKEP.PLGGVDMR.L                                                                                                                                                                                                                                                                                                               | Y423<br>Y423<br>Y423<br>Y423<br>Y349,Y350<br>Y350                                                                                                    | N<br><br><br><br>N<br>N                                          | C<br><br><br><br>C<br>C                                         | 3<br>1,2,3,4,5,6,7,8,9,10<br>1,3,9<br>1<br>1<br>1                                                                                                            | 1<br>15<br>3<br>1<br>1<br>1                                                                 | 20<br><br><br><br>1<br>2                                                                                        | 4.27<br>5.46<br>5.01<br>4.34<br>4.64<br>3.95                                                                                                                 | 3<br>2<br>3<br>3<br>3<br>3                                                                       |
| SH2-containing inositol 5-phosphatase 2 -- SHIP2                            | Q9JLL7   | K.NSFNNPAY@YVLEGVPHQLLPLEPPSLAR.A                                                                                                                                                                                                                                                                                                                                                                                                                                                                                                                    | Y987                                                                                                                                                 | N                                                                | C                                                               | 1,2,3,4,7                                                                                                                                                    | 8                                                                                           | 8                                                                                                               | 5.12                                                                                                                                                         | 3                                                                                                |
| Tyrosine-protein phosphatase non-receptor type substrate 1 - SHPS1          | P97797   | Y.ASIETGKVPREDTLTY@ADLDMVHL.S                                                                                                                                                                                                                                                                                                                                                                                                                                                                                                                        | Y481                                                                                                                                                 | N                                                                | U                                                               | 15                                                                                                                                                           | 1                                                                                           | 1                                                                                                               | 3.82                                                                                                                                                         | 3                                                                                                |
| Signal transducer and activator of transcription 3 -- STAT3                 | P42227   | K.YC*RPESQEHPEADPGSAAPY@LK.T                                                                                                                                                                                                                                                                                                                                                                                                                                                                                                                         | Y705                                                                                                                                                 | N                                                                | C                                                               | 1,2,3,4,6,7,8,9                                                                                                                                              | 9                                                                                           | 9                                                                                                               | 4.10                                                                                                                                                         | 3                                                                                                |
| STAT3 splice isoform Del-701                                                | P42227-3 | K.YC*RPESQEHPEADPGSAAPY@LK.T                                                                                                                                                                                                                                                                                                                                                                                                                                                                                                                         | Y704                                                                                                                                                 | N                                                                | U                                                               | 2,3,4,6,8                                                                                                                                                    | 5                                                                                           | 5                                                                                                               | 3.62                                                                                                                                                         | 3                                                                                                |
| Signal transducer and activator of transcription 5B -- STAT5B               | P42232   | K.AADGY@VKPQIK.Q                                                                                                                                                                                                                                                                                                                                                                                                                                                                                                                                     | Y699                                                                                                                                                 | N                                                                | U                                                               | 3                                                                                                                                                            | 1                                                                                           | 1                                                                                                               | 2.15                                                                                                                                                         | 2                                                                                                |
| <b>ADHESION: CELL/ECM</b>                                                   |          |                                                                                                                                                                                                                                                                                                                                                                                                                                                                                                                                                      |                                                                                                                                                      |                                                                  |                                                                 |                                                                                                                                                              |                                                                                             |                                                                                                                 |                                                                                                                                                              |                                                                                                  |
| CRK-associated substrate -- p130cas                                         | Q61140   | K.TQQGLY@QAPGNPQFQSPPAK.Q<br>R.VGGYVYEAQTEQDEY@DTPR.H<br><br>Y.VYEAQTEQDEY@DTPRHLL<br><br>R.HLLAPGPQDIY@DVPPVR.G                                                                                                                                                                                                                                                                                                                                                                                                                                     | Y132<br>Y238<br><br>Y238<br>Y253                                                                                                                     | N<br>N<br><br>N<br>N                                             | U<br>C<br><br>U<br>C                                            | 4,8<br>2,3,4,6,7,9<br><br>11,12,13,15,16,18<br>1,2,3,4,5,6,7,8,10                                                                                            | 2<br>5<br>5<br>5<br>3<br>15                                                                 | 2<br>18<br><br>32                                                                                               | 3.71<br>5.69<br>5.31<br>4.66<br>4.33<br>3.63                                                                                                                 | 3<br>3<br>2<br>3<br>2<br>3                                                                       |

|                                                         |        |                                                                                                                                                                                                                  |                                                                |    |   |                                                                                                      |                                                   |                                                                                   |                                                |        |
|---------------------------------------------------------|--------|------------------------------------------------------------------------------------------------------------------------------------------------------------------------------------------------------------------|----------------------------------------------------------------|----|---|------------------------------------------------------------------------------------------------------|---------------------------------------------------|-----------------------------------------------------------------------------------|------------------------------------------------|--------|
|                                                         |        | L.LAPGQDIY@DVPPVRGLLPNQY.G<br>R.GLLPNQYGQEVY@DTPPMAVK.G                                                                                                                                                          | Y253<br>Y271                                                   | N* | C | 11<br>1,2,3,4,9                                                                                      | 16<br>1<br>5                                      | 4.73<br>3.18<br>4.45                                                              | 2<br>2<br>2                                    |        |
|                                                         |        | K.GPNGRDPLLDVY@DVPPSVEK.G<br>K.GLLSSSHSVY@DVPPSVSK.D<br>K.DVPDGPLLREETY@DVPPAFAPK.P<br>R.RPGGTLY@DVPR.E<br>R.ERVLPEVADGSSVDDGVY@AVPPPAER.E<br>R.VLPPEVADGSSVDDGVY@AVPPPAER.E<br>L.SRQLQKMEDVY@QTL.V              | Y291<br>Y310<br>Y331<br>Y391<br>Y414<br>Y414<br>Y556           | N* | C | 1,2<br>1,2,3,4<br>4<br>8,10<br>3<br>1,4,7,9<br>11                                                    | 2<br>7<br>1<br>2<br>1<br>5<br>1                   | 2.76<br>4.30<br>4.09<br>4.32<br>2.43<br>4.17<br>4.75<br>2.82                      | 3<br>3<br>3<br>2<br>3<br>2<br>2                |        |
| Enhancer of filamentation 1 -- HEF1                     | O35177 | R.TGHGVYVY@EYPSR.Y<br>K.ANPEERDGVY@DVPLHNPADAK.G                                                                                                                                                                 | Y165<br>Y344                                                   | N  | U | 3<br>4,8                                                                                             | 1<br>2                                            | 3.15<br>4.49                                                                      | 2<br>3                                         |        |
| Integrin beta-1 precursor                               | P09055 | K.WDTGENPIY@K.S                                                                                                                                                                                                  | Y783                                                           | N  | U | 4                                                                                                    | 1                                                 | 2.09                                                                              | 2                                              |        |
| Lipoma-preferred partner homolog - LPP                  | Q8BFW7 | H.YMAGPSSGQIY@GPGPRGY.N<br>M.AGPSSGQIY@GPGPRGY.N<br>Y.MAGPSSGQIY@GPGPRGY.N<br><br>R.GYNNQVPVSGQC*PPPPTC*VGTDY@AYIPSSG<br>HPPESGYGYTSNQGR.Y<br>R.YYEPY@YAAGPSYGG.R.S<br>R.YYEPY@AAGPSYGG.R.S                      | Y245<br>Y245<br>Y245<br><br>Y276<br>Y301<br>Y302               | N  | C | 11,12,13<br>11,12,13<br>11,12,13,15,18<br><br>4<br>2,3,4,6,7,8,9,10<br>1,2,3,4,6,8,9,10              | 2<br>3<br>3<br>5<br>1<br><br>1<br>8<br>8          | 14<br>3.69<br>4.72<br>3.88<br>3.87<br>4.33<br><br>4.26<br>4.36<br>4.73            | 3<br>2<br>2<br>2<br>3<br><br>3<br>2<br>2       |        |
| Paxillin                                                | Q8VI36 | F.LSEEPY@SYPTGNHTY.Q<br>L.SEEPY@SYPTGNHTY.Q<br>S.KRPVFLSEEPY@SYPTGNHTY.Q<br>R.YAHQQPPS@PLPVY@SSSAK.N<br>R.YAHQQPPS@PLPVY@SSSAK.N<br>R.YAHQQPPS@PLPVY@SSSAK.N<br>R.AGEEHVY@SFPNK.Q<br><br>R.AGEEHVY@SFPNKQK.S     | Y31<br>Y31<br>Y31<br>Y88<br>Y88<br>Y88<br>Y118<br>Y118         | N  | C | 11,15,16,18<br>11,13<br>11<br>2,3,4<br>1,4,6<br>9,10<br>1,2,3,4,5,6,7,8,9,10<br>1,2,3,4,5,6,7,8,9,10 | 4<br>2<br>1<br>4<br>3<br>2<br>11<br>20<br>18<br>1 | 7<br>2.51<br>3.41<br>3.60<br>3.06<br>3.27<br>50<br>4.08<br>4.68<br>4.56<br>3.39   | 2<br>2<br>3<br>2<br>3<br>3<br>3<br>2<br>3<br>2 |        |
| Pleckstrin homology domain containing family C member 1 | Q8CIB5 | L.LIMPSSGSIY@SSPGLY.S                                                                                                                                                                                            | Y179                                                           | N* | U | 11                                                                                                   | 1                                                 | 2.86                                                                              | 2                                              |        |
| Syndecan-4 precursor                                    | O35988 | K.KAPTNEFY@A.-<br>Y.KKAPTNEFY@A.-                                                                                                                                                                                | Y197<br>Y197                                                   | N* | C | 3<br>12,13,15                                                                                        | 1<br>3                                            | 1.85<br>2.95                                                                      | 2<br>2                                         |        |
| Talin 1                                                 | P26039 | K.TM#QFEPSTMVY@DAC*R.M<br>K.TM#QFEPSTMVY@DAC*R.M<br>M.QFEPSTMVY@DAC*RM.I<br>F.LSDDDPKGIWLEAGKALDY@Y.M<br>K.ALDY@YM#LR.N<br>K.ALDY@YMLR.N<br>W.LEAGKALDY@Y.M<br>R.IGITNHDEY@SLVR.E<br><br>K.LLGEIAQGNENY@AGIAAR.D | Y26<br>Y26<br>Y26<br>Y70<br>Y70<br>Y70<br>Y70<br>Y127<br>Y1116 | N* | C | 3<br>1,2,3,6<br>11,12,15<br>11,12,15,18<br>3,10<br>2,3,8<br>12,15,16<br>3<br>3<br>2,3,4,6            | 1<br>4<br>3<br>4<br>2<br>3<br>3<br>1<br>1<br>4    | 8<br>4.07<br>4.88<br>3.24<br>4.32<br>2.70<br>2.83<br>3.14<br>2.52<br>3.22<br>5.20 | 2<br>2<br>2<br>3<br>2<br>2<br>2<br>2<br>3<br>2 |        |
| Tensin                                                  | Q9DBT6 | R.HAAY@GGY@STPEDR.R<br>R.HAAY@GGYSTPEDR.R<br>R.HAAYGGY@STPEDR.R<br>R.HAAYGGY@STPEDRRPT*LSR.Q                                                                                                                     | Y213,Y216<br>Y213<br>Y216<br>Y216                              | N  | U | 10<br>1,6<br>2,3,8,9,10<br>8                                                                         | 1<br>2<br>5<br>1                                  | 3.22<br>3.04<br>4.14<br>2.72                                                      | 2<br>2<br>2<br>3                               |        |
| Tensin 2                                                | Q8CJ95 | H.TRGPLDGSPY@AQVQ.R<br>L.AHTRGPLDGSPY@AQVQ.R<br>R.GPLDGSPY@AQVQ.R.V<br>K.VGEEGHEGC*SY@AVC*SEGR.Y                                                                                                                 | Y460<br>Y460<br>Y460<br>Y747                                   | N  | U | 11<br>11<br>1,2,3,4,5,6,8<br>2,3                                                                     | 1<br>1<br>9<br>2                                  | 11<br>2.77<br>3.56<br>3.57<br>3.73                                                | 2<br>2<br>2<br>3                               |        |
| Tensin 3                                                | Q5SSZ5 | L.HTQGPVDGSLY@AKVR.K<br>R.KPSAPTPVQAYGQSNY@STQTWVR.Q                                                                                                                                                             | Y354<br>Y584                                                   | N  | C | 12<br>3,4                                                                                            | 1<br>2                                            | 3.65<br>5.12                                                                      | 3<br>3                                         |        |
| Vinculin                                                | Q64727 | R.ILLRNPNQAAY@EHFETMK.N<br>K.SFLDSGY@R.I                                                                                                                                                                         | Y691<br>Y821                                                   | N* | C | 1,3,4<br>1,2,3,4,6,7,8,9,10                                                                          | 3<br>15                                           | 3<br>15                                                                           | 6.55<br>2.69                                   | 3<br>2 |
| <b>ADHESION: CELL/CELL</b>                              |        |                                                                                                                                                                                                                  |                                                                |    |   |                                                                                                      |                                                   |                                                                                   |                                                |        |
| Catenin delta-1 -- p120 catenin                         | P30999 | K.LNGPQDHNHLLY@STIPR.M<br>R.HYEDGYPGSDNY@GSLSR.V<br>R.HYEDGYPGSDNY@GS*LSR.V<br>R.FHPEPYGLEDDQRSMGY@DDLTY@GMMSDYGT<br>AR.R<br>K.SDNINY@STLNER.G                                                                   | Y96<br>Y228<br>Y228<br>Y291,Y296<br>Y877                       | N  | C | 3,4,5,6,8,9,10<br>3,4,6,7,8,9,10<br>2<br>9<br>2,5                                                    | 2<br>10<br>7<br>4<br>1<br>1<br>2                  | 12<br>12<br>3.82<br>4.57<br>5.22<br>4.31<br>3.35<br>1,1<br>3.07                   | 2<br>3<br>3<br>2<br>2<br>3<br>2                |        |
| Ctnnd1 protein -- p120 catenin, isoform                 | Q80XQ4 | K.SLDNNY@STLNER.G                                                                                                                                                                                                | Y904                                                           | Y  | U | 1,2,3,4,6,8                                                                                          | 6                                                 | 6                                                                                 | 3.78                                           | 2      |



|                                                                        |        |                                                                                                                                                                                                             |                                                             |                               |                            |                                                     |                                 |                                  |                                                              |                                 |
|------------------------------------------------------------------------|--------|-------------------------------------------------------------------------------------------------------------------------------------------------------------------------------------------------------------|-------------------------------------------------------------|-------------------------------|----------------------------|-----------------------------------------------------|---------------------------------|----------------------------------|--------------------------------------------------------------|---------------------------------|
| Discs large homolog 3                                                  | P70175 | R.RDNEVDGQDY@HFVWSR.E                                                                                                                                                                                       | Y705                                                        | N*                            | U                          | 2,3,4                                               | 3                               | 3                                | 4.34                                                         | 3                               |
| Fath protein [fragment]                                                | Q497H5 | K.NIY@SDIPPQVVPVRISYTPSIFSDSR.N                                                                                                                                                                             | Y952                                                        | N*                            | U                          | 2,3,4                                               | 3                               | 3                                | 3.77                                                         | 3                               |
| Partitioning-defective 3 homolog -- PARD3                              | Q99NH2 | R.ISHSLY@SGIEGLDESPTR.N<br>R.RIS@HSLY@SGIEGLDESPTR.N<br>R.RISHS@LY@SGIEGLDESPTR.N<br>R.RISHSLY@SGIEGLDESPTR.N<br>R.ERDY@AEIQDFHR.T<br>R.EGHLMDTLY@AQVK.K<br>R.KNASSISQDSWEQNY@APGEGFQSAK.E                  | Y719<br>Y719<br>Y719<br>Y719<br>Y1076<br>Y1123<br>Y1238     | Y<br>N*<br>N<br>N*            | U<br>U<br>U<br>U           | 3,4<br>2<br>4<br>1<br>4<br>3<br>2,3,4,8             | 1<br>2<br>1<br>1<br>1<br>1<br>4 | 6<br>1<br>1<br>1<br>1<br>1<br>4  | 4.16<br>5.37<br>3.50<br>4.25<br>3.02<br>2.77<br>3.41<br>4.96 | 3<br>2<br>3<br>3<br>3<br>2<br>3 |
| Plakophilin-4; Armadillo related protein                               | Q68FH0 | R.TVHMDQFGQQYDIY@ER.M<br>L.RSAVSPDLHITPIY@EGRTY.Y<br>R.NNY@ALNTAATY@AEPYRPVQYR.V<br>R.NNYALNTAATY@AEPYRPVQYR.V<br>Y.ALNTAATY@AEPYR<br>R.SY@EDPYC*DDRVHFPAST@DYSTQYGLK.S<br>R.SY@EDPYC*DDRVHFPASTDYSTQYGLK.S | Y371<br>Y414<br>Y469,Y477<br>Y477<br>Y477<br>Y1137<br>Y1137 | N*<br>N<br>Y<br>N<br>N*<br>N* | C<br>C<br>U<br>U<br>U<br>U | 4<br>11<br>2,3,4<br>3,5,7,8,9,10<br>11,15<br>2<br>3 | 1<br>1<br>3<br>6<br>2<br>1<br>1 | 1<br>1<br>3<br>11<br>2<br>2<br>4 | 3.34<br>4.07<br>4.49<br>3.50<br>2.89<br>4.65<br>5.23         | 3<br>3<br>3<br>3<br>2<br>3<br>3 |
| Scavenger receptor class F member 2 precursor                          | P59222 | R.SASSVEGPGALY@AR.V                                                                                                                                                                                         | Y615                                                        | N                             | C                          | 3                                                   | 1                               | 1                                | 2.21                                                         | 2                               |
| Tight junction protein ZO-1                                            | P39447 | Y.LSAPGSEY@SMY.S<br>R.HEEQPAPAY@EVHNR.Y                                                                                                                                                                     | Y830<br>Y1164                                               | N*<br>N                       | C<br>C                     | 11<br>1,2,3,6,8,10                                  | 1<br>6                          | 1<br>6                           | 2.30<br>4.58                                                 | 2<br>3                          |
| Tight junction protein ZO-2                                            | Q9Z0U1 | R.JEIAQKHPDIY@AVPIK.A                                                                                                                                                                                       | Y1095                                                       | N                             | C                          | 3,4,5                                               | 3                               | 3                                | 2.99                                                         | 3                               |
| <b>CYTOSKELETON: ACTIN-ASSOCIATED</b>                                  |        |                                                                                                                                                                                                             |                                                             |                               |                            |                                                     |                                 |                                  |                                                              |                                 |
| <b>Actins and actin-related proteins; Regulators of actin assembly</b> |        |                                                                                                                                                                                                             |                                                             |                               |                            |                                                     |                                 |                                  |                                                              |                                 |
| Actin, alpha skeletal muscle (Beta-actin) (Gamma-actin)                | P68134 | K.IWHHTFY@NELR.V<br>M.VMGQKQDSY@VGDEAQSKRGIL.T                                                                                                                                                              | Y93<br>Y55                                                  | N<br>N                        | C<br>C                     | 2,8,9<br>11                                         | 3<br>1                          | 3<br>1                           | 2.86<br>5.32                                                 | 3<br>3                          |
| Cofilin-1, non-muscle isoform                                          | P18760 | K.HELQANC*Y@EEVKDR.C<br>K.LTGIKHELQANC*Y@EEVKDR.C<br>L.TGIKHELQANC*Y@EEVKDR*TLA                                                                                                                             | Y139<br>Y139<br>Y139                                        | N<br>Y<br>N                   | C<br>C<br>C                | 1,2,3,4,5,6,7,8<br>4<br>11,13                       | 8<br>1<br>2                     | 11<br>3<br>3                     | 4.82<br>4.41<br>3.61                                         | 3<br>3<br>3                     |
| Src substrate cortactin                                                | Q60598 | Y.TSEPVY@ETTEAPGHY.Q                                                                                                                                                                                        | Y466                                                        | N                             | C                          | 11,12,13,14,15,16,17,18                             | 1<br>8                          | 9<br>3                           | 3.87<br>3.47                                                 | 3<br>2                          |
| Vasodilator-stimulated phosphoprotein -- VASP                          | P70460 | F.SRVQIY@HNPTANSF.R<br>R.VQIY@HNPTANSF.R                                                                                                                                                                    | Y39<br>Y39                                                  | N                             | C                          | 11<br>2,3,4                                         | 1<br>1<br>3                     | 5<br>3<br>3                      | 3.52<br>2.80<br>3.96                                         | 2<br>3<br>2                     |
| N-WASP: Neural Wiskott-Aldrich syndrome protein                        | Q91YD9 | K.DRETSKVIY@DFIEK.T<br>K.VIY@DFIEK.T                                                                                                                                                                        | Y253                                                        | N                             | C                          | 1,2,3<br>1,2,3,4,6,7                                | 3<br>6                          | 9<br>3                           | 3.37<br>3.08                                                 | 3<br>2                          |
| WD-repeat protein 1; Actin interacting protein 1 -- AIP1               | O88342 | K.AHDGGIY@AISWSPDSTHLLSASGDK.T                                                                                                                                                                              | Y237                                                        | N                             | C                          | 9                                                   | 1                               | 1                                | 5.53                                                         | 3                               |
| <b>Other actin-associated proteins</b>                                 |        |                                                                                                                                                                                                             |                                                             |                               |                            |                                                     |                                 |                                  |                                                              |                                 |
| Band 4.1-like protein 2                                                | O70318 | N.TLRVDGDNII@VRHSNL.M<br>R.VDGDNIY@VR.H                                                                                                                                                                     | Y606<br>Y606                                                | N                             | U                          | 11,12<br>3,5                                        | 2<br>2                          | 4<br>3                           | 4.28<br>2.73                                                 | 3<br>2                          |
| Calponin-2                                                             | Q08093 | K.CASQSGMTAY@GT@RR.H                                                                                                                                                                                        | Y184                                                        | N*                            | U                          | 1                                                   | 1                               | 1                                | 2.64                                                         | 3                               |
| Calponin-3                                                             | Q9DAW9 | Y.HGEYPPDY@PREY.Q                                                                                                                                                                                           | Y316                                                        | Y                             | C                          | 11                                                  | 1                               | 1                                | 2.26                                                         | 2                               |
| LIM and SH3 domain protein 1 -- LASP-1                                 | Q61792 | H.HIPTSAPVY@QQPQQQM.T                                                                                                                                                                                       | Y173                                                        | N                             | C                          | 11,12                                               | 2<br>1                          | 3<br>3                           | 3.77<br>4.28                                                 | 3<br>2                          |
| Septin-2                                                               | P42208 | K.QQPTQFINPETPGY@VGFANLPNQVHR.K<br>K.QQPTQFINPETPGY@VGFANLPNQVHR.K                                                                                                                                          | Y17<br>Y17                                                  | N                             | C                          | 2,3,4,6<br>3                                        | 4<br>1                          | 5<br>3                           | 4.35<br>2.82                                                 | 3<br>3                          |
| Sickle tail-b (Sickle tail-a)                                          | Q75UV8 | R.NVY@YELNDVR.N<br>R.NEGFY@ADPYLYHEGR.M                                                                                                                                                                     | Y244<br>Y393                                                | Y<br>Y                        | U<br>U                     | 1,2,3,4,8<br>3,6,8,9                                | 5<br>3<br>2                     | 5<br>5<br>3                      | 3.47<br>3.56<br>3.29                                         | 2<br>3<br>2                     |
| <b>CYTOSKELETON: MICROTUBULE-ASSOCIATED</b>                            |        |                                                                                                                                                                                                             |                                                             |                               |                            |                                                     |                                 |                                  |                                                              |                                 |
| none                                                                   |        |                                                                                                                                                                                                             |                                                             |                               |                            |                                                     |                                 |                                  |                                                              |                                 |
| <b>CYTOSKELETON: OTHER</b>                                             |        |                                                                                                                                                                                                             |                                                             |                               |                            |                                                     |                                 |                                  |                                                              |                                 |
| Vimentin                                                               | P20152 | R.FANY@IDKVR.F                                                                                                                                                                                              | Y116                                                        | N*                            | U                          | 3,4,5                                               | 3                               | 3                                | 2.74                                                         | 2                               |



|                                                        |        |                                                                                                            |                                      |         |        |                                     |                       |        |                                      |                       |
|--------------------------------------------------------|--------|------------------------------------------------------------------------------------------------------------|--------------------------------------|---------|--------|-------------------------------------|-----------------------|--------|--------------------------------------|-----------------------|
|                                                        |        | R.SLY@SSSPGGAYVTR.S                                                                                        | Y52                                  | N       | C      | 2,3                                 | 2                     | 2      | 3.68                                 | 2                     |
| <b>TRAFFICKING/TRANSPORT</b>                           |        |                                                                                                            |                                      |         |        |                                     |                       |        |                                      |                       |
| <b>Vesicle transport</b>                               |        |                                                                                                            |                                      |         |        |                                     |                       |        |                                      |                       |
| Double C2-like domain containing protein beta          | P70169 | K.TY@LKPVDVKKSK.H<br>K.TY@LKPVDVKKS*K.H                                                                    | Y309<br>Y309                         | Y       | U      | 4<br>6                              | 1<br>1                | 2      | 2.33<br>2.99                         | 2<br>2                |
| Intersectin 2                                          | Q9Z0R6 | R.GEPEALY@AAVTK.K                                                                                          | Y 921                                | N       | C      | 1,2,3,4,5,6,7,8,9,10                | 15                    | 15     | 3.76                                 | 2                     |
| Low-density lipoprotein receptor precursor             | P35951 | F.DNPVY@QKTTEDELHIC*RSQDGY.T                                                                               | Y832                                 | N*      | U      | 11                                  | 1                     | 1      | 3.74                                 | 3                     |
| Nucleoporin-like protein RIP                           | Q8K2K6 | K.AGLQTADKY@AALANLDNIFSAGQGGDQSGGFG<br>TTGK.A                                                              | Y327                                 | N*      | U      | 4                                   | 1                     | 1      | 6.08                                 | 3                     |
| Transferrin receptor protein 1 - TFR                   | Q62351 | F.SNLFGGEPLSY@TRF.S<br>R.SAFSNLFGGEPLSY@TR.F                                                               | Y20<br>Y20                           | N       | U      | 12,15,16,18<br>4,6,7                | 4<br>3                | 7      | 3.99<br>4.36                         | 2<br>2                |
| <b>Nucleocytoplasmic transport</b>                     |        |                                                                                                            |                                      |         |        |                                     |                       |        |                                      |                       |
| None                                                   |        |                                                                                                            |                                      |         |        |                                     |                       |        |                                      |                       |
| <b>Other transport</b>                                 |        |                                                                                                            |                                      |         |        |                                     |                       |        |                                      |                       |
| Gap junction alpha-1 protein -- Connexin 43            | P23242 | K.QASEQNWANY@SAEQNR.M                                                                                      | Y312                                 | N*      | U      | 2,3                                 | 1<br>1                | 2      | 2.94<br>3.68                         | 2<br>3                |
| Lysosomal-associated transmembrane protein 4A          | Q60961 | K.IPEKEPPPPY@LPA.-                                                                                         | Y230                                 | N*      | U      | 3,4                                 | 3                     | 3      | 2.56                                 | 2                     |
| Sodium bicarbonate cotransporter 2B homolog [fragment] | Q8BTY2 | K.DKSDSKEDGRES@PSY@DTPSQR.V<br>K.DKDS*DKEDGRES@DTPSQR.V                                                    | Y92<br>Y92                           | Y       | U      | 8<br>8                              | 1<br>1                | 2      | 3.62<br>2.50                         | 3<br>3                |
| Solute carrier family 38, member 2                     | Q8CFE6 | K.SHY@ADVDPENQNFLLESNLGK.K<br>K.SHY@ADVDPENQNFLLESNLGK.K<br>L.KSHY@ADVDPENQNFL                             | Y41<br>Y41<br>Y41                    | N*      | U      | 2,4<br>2,3,4<br>11,12               | 2<br>3<br>2           | 7      | 4.98<br>5.04<br>4.14                 | 3<br>3<br>2           |
| <b>METABOLIC AND BIOSYNTHETIC ENZYMES</b>              |        |                                                                                                            |                                      |         |        |                                     |                       |        |                                      |                       |
| <b>Glycolytic enzymes</b>                              |        |                                                                                                            |                                      |         |        |                                     |                       |        |                                      |                       |
| Alpha enolase (beta-enolase) (gamma enolase)           | P17182 | R.GNPTVEVDLY@TAK.G<br>R.AAVPSGASTGIY@EALELR.D                                                              | Y24<br>Y43                           | N<br>N  | C<br>C | 9<br>1,2,3,4,9                      | 1<br>6                | 1<br>6 | 3.83<br>5.24                         | 2<br>2                |
| Glyceraldehyde-3-phosphate dehydrogenase -- GAPDH      | P16858 | K.LISWYDNEY@GYSNR.V                                                                                        | Y315                                 | N       | C      | 1,2,3,4,6,9                         | 8                     | 8      | 4.40                                 | 2                     |
| Phosphoglycerate mutase 1                              | Q9DBJ1 | R.FSGWY@DADLSPAGHEEAKR.G                                                                                   | Y25                                  | N       | C      | 4,9                                 | 2                     | 2      | 3.93                                 | 3                     |
| Pyruvate kinase, isozyme M2                            | P52480 | R.EAEAAIY@HLQLFEELRR.L                                                                                     | Y389                                 | N       | C      | 9                                   | 1                     | 1      | 2.56                                 | 3                     |
| <b>Other metabolic/biosynthetic enzymes</b>            |        |                                                                                                            |                                      |         |        |                                     |                       |        |                                      |                       |
| Bifunctional purine biosynthesis protein PURH          | Q9CJW9 | R.VC*VMY@DLYPTLPLAVAYAR.A                                                                                  | Y290                                 | N*      | C      | 9                                   | 1                     | 1      | 4.21                                 | 3                     |
| Serine hydroxymethyltransferase, cytosolic             | P50431 | K.MLSQPLKSDAEVY@SIKK.E                                                                                     | Y28                                  | N*      | C      | 9                                   | 1                     | 1      | 4.18                                 | 3                     |
| TK: Transketolase                                      | P40142 | K.NMAEQIIQEIY@SQVQSK.K                                                                                     | Y275                                 | N       | C      | 5                                   | 1                     | 1      | 3.39                                 | 3                     |
| <b>RNA SYNTHESIS AND PROCESSING</b>                    |        |                                                                                                            |                                      |         |        |                                     |                       |        |                                      |                       |
| <b>Transcription machinery and regulation</b>          |        |                                                                                                            |                                      |         |        |                                     |                       |        |                                      |                       |
| Polymerase I and transcript release factor             | O54724 | F.KVMIIY@QDEVKLPKAL.S<br>K.VMIY@QDEVKLPKAL.L<br>F.TPDHVY@ARSKTAVY.K<br>K.SFTPDHVY@AR.S<br>R.KSFTPDHVY@AR.S | Y158<br>Y158<br>Y310<br>Y310<br>Y310 | N*<br>N | C<br>C | 12,13<br>4<br>11,12<br>3,4,8<br>3,5 | 2<br>1<br>2<br>3<br>2 | 3<br>7 | 5.14<br>3.05<br>2.68<br>3.00<br>2.99 | 3<br>2<br>3<br>2<br>3 |
| <b>DEAD(DEAH)-box helicases</b>                        |        |                                                                                                            |                                      |         |        |                                     |                       |        |                                      |                       |
| ATP-dependent RNA helicase DDX3X                       | Q62167 | R.GRGDY@DGIGGR.G<br>R.GRGDY@DGIGGRGDR.S                                                                    | Y103<br>Y103                         | N       | C      | 3<br>1,2                            | 1<br>2                | 3      | 3.08<br>3.00                         | 2<br>3                |
| <b>hnRNPs and snRNPs</b>                               |        |                                                                                                            |                                      |         |        |                                     |                       |        |                                      |                       |
| none                                                   |        |                                                                                                            |                                      |         |        |                                     |                       |        |                                      |                       |
| <b>Splicing factors</b>                                |        |                                                                                                            |                                      |         |        |                                     |                       |        |                                      |                       |

|                                                                                                                                 |        |                                                    |      |    |   |                      |    |    |      |   |
|---------------------------------------------------------------------------------------------------------------------------------|--------|----------------------------------------------------|------|----|---|----------------------|----|----|------|---|
| none                                                                                                                            |        |                                                    |      |    |   |                      |    |    |      |   |
| <b>Other RNA binding and processing</b>                                                                                         |        |                                                    |      |    |   |                      |    |    |      |   |
| Poly(rC)-binding protein 2                                                                                                      | Q61990 | Y.TIQGQY@AIPQPDCLKLHQLAM.Q                         | Y232 | Y  | C | 11                   | 1  | 1  | 2.85 | 3 |
| Putative RNA-binding protein 3                                                                                                  | O89086 | R.YDSRPGGYGY@GYGR.S                                | Y124 | N* | C | 2,4,8                | 3  | 4  | 4.19 | 3 |
|                                                                                                                                 |        | Y.DSRPGGYGY@GY.G                                   | Y124 |    |   | 11                   | 1  |    | 1.98 | 2 |
|                                                                                                                                 |        | R.YDSRPGGYGY@GR.S                                  | Y126 | N  | C | 10                   | 1  | 1  | 2.63 | 3 |
|                                                                                                                                 |        | R.YSGGNYRDNY@DN.-                                  | Y151 | N  | U | 5                    | 1  | 1  | 2.54 | 2 |
| RNA-binding protein 14                                                                                                          | Q8C2Q3 | R.LPDAHSDY@AR.Y                                    | Y645 | N* | U | 7                    | 1  | 1  | 2.00 | 2 |
| <b>PROTEIN SYNTHESIS AND PROCESSING</b>                                                                                         |        |                                                    |      |    |   |                      |    |    |      |   |
| <b>tRNA synthetases</b>                                                                                                         |        |                                                    |      |    |   |                      |    |    |      |   |
| None                                                                                                                            |        |                                                    |      |    |   |                      |    |    |      |   |
| <b>Translation machinery</b>                                                                                                    |        |                                                    |      |    |   |                      |    |    |      |   |
| 40S ribosomal protein S10                                                                                                       | P63325 | R.IAIY@ELLFK.E                                     | Y12  | N  | C | 7,9                  | 2  | 2  | 2.96 | 2 |
| 60S acidic ribosomal protein P0                                                                                                 | P14869 | K.IQLLDDY@PK.C                                     | Y24  | N  | U | 2,3,4,7,10           | 5  | 5  | 3.41 | 2 |
| 67 kDa polymerase-associated factor PAF67; Eukaryotic translation initiation factor 3 subunit 6-interacting protein -- Eif3s6ip | Q91YE4 | K.GDPQVYEELFSY@AC*PK.F                             | Y415 | N* | C | 9                    | 1  | 1  | 4.00 | 2 |
| Eukaryotic initiation factor 4A-I                                                                                               | P60843 | R.GFKDQIY@DIFQK.L                                  | Y197 | N* | C | 9                    | 1  | 1  | 3.51 | 2 |
| Elongation factor 1-alpha 1 -- eEF1A-1 (eEF1A-2)                                                                                | P10126 | K.STTTGHLIY@K.C                                    | Y29  | N  | C | 1,2,3,4,5,6,7,8,9,10 | 11 | 11 | 3.08 | 2 |
|                                                                                                                                 |        | R.EHALLAY@TLGVK.Q                                  | Y141 | N  | C | 3,4,8,9              | 4  | 4  | 3.34 | 2 |
| Laminin receptor 1 (ribosomal protein SA)                                                                                       | Q8BNL2 | R.ADHQLTEASY@VNLPTIALC*NTDSPLR.Y                   | Y139 | N  | C | 1,2,4                | 3  | 3  | 5.52 | 3 |
| G1 to phase transition 2 -- GSPT2                                                                                               | Q9CY91 | K.Y@LIVLINK.M                                      | Y347 | Y  | C | 5                    | 1  | 1  | 2.08 | 2 |
| <b>Post-translational modifiers</b>                                                                                             |        |                                                    |      |    |   |                      |    |    |      |   |
| Probable palmitoyltransferase ZDHHC5                                                                                            | Q8VDZ4 | R.EPS@PVRY@DNLSR.H                                 | Y533 | Y  | U | 6                    | 1  | 2  | 2.55 | 3 |
|                                                                                                                                 |        | R.LLPTGPPHREPS@PVRY@DNLSR.H                        | Y533 |    |   | 3                    | 1  |    | 3.00 | 3 |
| Probable palmitoyltransferase ZDHHC8                                                                                            | Q5Y5T5 | F.SPVLGPRPREPS*PVRY@DNLS                           | Y538 | Y  | U | 13                   | 1  | 3  | 2.51 | 3 |
|                                                                                                                                 |        | R.PREPS*PVRY@DNLSR.T                               | Y538 |    |   | 5,8                  | 2  |    | 3.18 | 3 |
|                                                                                                                                 |        | L.RSQDLSLFGDSGVY@DTPSSY.S                          | Y576 | N* | C | 12,13,15,16,18       | 5  | 5  | 5.17 | 2 |
| <b>Chaperones and associated proteins</b>                                                                                       |        |                                                    |      |    |   |                      |    |    |      |   |
| BAG-family molecular chaperone regulator-3                                                                                      | Q9JLV1 | K.THYPAAQQGEY@QPQQPVYHK.I                          | Y246 | N  | C | 4                    | 1  | 1  | 2.59 | 3 |
| Heat shock 70 kDa protein 4                                                                                                     | Q61316 | K.LKKEDIY@AVEIVGGATR.I                             | Y336 | N  | C | 9                    | 1  | 1  | 2.71 | 3 |
| Heat shock protein HSP 90-beta                                                                                                  | P11499 | K.SIY@YITGESK.E                                    | Y483 | N  | C | 3,4                  | 2  | 2  | 2.62 | 2 |
| <b>PROTEIN DEGRADATION</b>                                                                                                      |        |                                                    |      |    |   |                      |    |    |      |   |
| <b>Ubiquitin conjugation regulators</b>                                                                                         |        |                                                    |      |    |   |                      |    |    |      |   |
| E3 ubiquitin protein ligase CBL                                                                                                 | P22682 | K.IKPSSSANAIY@SLAARPLMPK.L                         | Y672 | N  | C | 2,5,7,9              | 4  | 4  | 3.55 | 3 |
| E3 ubiquitin-protein ligase CBL-B                                                                                               | Q3TTA7 | R.ASQDY@DQLPSSSDGSOAPARPPKPR.P                     | Y889 | N  | U | 3,4                  | 2  | 2  | 3.97 | 3 |
| Probable E3 ubiquitin-protein ligase MGRN1                                                                                      | Q9D074 | L.RAVSPAIPSAPLY@EEITY.S                            | Y389 | N  | U | 12                   | 1  | 1  | 4.07 | 2 |
| <b>Proteasome components</b>                                                                                                    |        |                                                    |      |    |   |                      |    |    |      |   |
| Proteasome subunit alpha type 2 -- PSMA2                                                                                        | P49722 | K.HIGLVY@SGMGPDYR.V                                | Y75  | N* | C | 9                    | 1  | 1  | 4.72 | 2 |
| <b>Other proteases and endopeptidases</b>                                                                                       |        |                                                    |      |    |   |                      |    |    |      |   |
| ADAM 9 precursor                                                                                                                | Q61072 | K.ISSQGNLIPARPAPPLY@SSLT.-<br>N.LIPARPAPPLY@SSLT.- | Y841 | N* | U | 3                    | 1  | 2  | 3.11 | 2 |
|                                                                                                                                 |        |                                                    | Y841 |    |   | 11                   | 1  |    | 3.06 | 2 |
| Prolyl endopeptidase                                                                                                            | Q9QUR6 | R.MTELY@DYPK.Y                                     | Y71  | N* | C | 3                    | 1  | 1  | 2.31 | 2 |

| NUCLEAR PROTEINS                                                                                                               |               |                                                                                           |                      |     |     |                   |             |     |                      |             |
|--------------------------------------------------------------------------------------------------------------------------------|---------------|-------------------------------------------------------------------------------------------|----------------------|-----|-----|-------------------|-------------|-----|----------------------|-------------|
| Histone H2B type 1-B                                                                                                           | Q64475        | R.KESYSVY@VYK.V                                                                           | Y41                  | N*  | U   | 8                 | 1           | 1   | 3.14                 | 2           |
| MISCELLANEOUS                                                                                                                  |               |                                                                                           |                      |     |     |                   |             |     |                      |             |
| Microfibril-associated glycoprotein 3 precursor                                                                                | Q922T2        | R.IKERPALDAQSGIY@VINPELGR.S                                                               | Y277                 | N*  | U   | 3                 | 1           | 1   | 3.28                 | 3           |
| Psychosine receptor                                                                                                            | Q61038        | R.Y@LAVVYPLK.F                                                                            | Y115                 | N*  | U   | 2,6               | 2           | 2   | 2.24                 | 2           |
| FUNCTION UNKNOWN OR UNCERTAIN                                                                                                  |               |                                                                                           |                      |     |     |                   |             |     |                      |             |
| Named proteins of unknown/uncertain function                                                                                   |               |                                                                                           |                      |     |     |                   |             |     |                      |             |
| Carnitine deficiency-associated protein CDV3A (CDV3B)                                                                          | Q920I4        | R.KTPQGPEIY@SDTQFPLQSTAK.H                                                                | Y213                 | N   | C   | 3,4,5,7,8         | 6           | 6   | 5.88                 | 3           |
| Brain-specific angiogenesis inhibitor 1-associated protein 2-like protein 1                                                    | Q9DBJ3        | K.MIGKDY@DTLSK.Y<br>M.IGKDY@DTLSKY.S                                                      | Y274<br>Y274         | N*  | U   | 2,3<br>11         | 2<br>1      | 3   | 3.31<br>3.13         | 2<br>2      |
| Suppression of tumorigenicity 5                                                                                                | Q924W7        | K.STLEENAYEDIVGGLPKENPY@EDVDLKN                                                           | Y498                 | N*  | C   | 3                 | 1           | 1   | 3.90                 | 3           |
| Pituitary tumor-transforming gene 1 protein-interacting protein precursor                                                      | Q8R143        | F.KEQNPY@EKF.-<br>K.EQNPY@EKF.-                                                           | Y171<br>Y171         | N*  | U   | 11,13,14<br>2,3   | 3<br>2      | 5   | 2.88<br>2.18         | 2<br>2      |
| WW domain binding protein 4                                                                                                    | Q3TWW5        | K.FGDY@C*K.C<br>K.S*QPKKFGDY@C*K.C                                                        | Y15<br>Y15           | Y   | U   | 4,5,10<br>10      | 3<br>1      | 4   | 2.90<br>3.05         | 2<br>3      |
| Unnamed proteins of unknown/uncertain function                                                                                 |               |                                                                                           |                      |     |     |                   |             |     |                      |             |
| hypothetical protein -- Cdc105                                                                                                 | Q9D4K7        | K.FNQEM#Y@VTRGIK.G                                                                        | Y372                 | Y   | U   | 5,7,8             | 2<br>1      | 3   | 2.66<br>2.61         | 2<br>3      |
| hypothetical HAT dimerisation/BED finger/Bipartite nuclear localization signal/Zinc finger BED-type profile containing protein | Q3UMD3        | W.HFFHVDPQY@TW.R                                                                          | Y145                 | Y   | U   | 12,15             | 2           | 2   | 3.42                 | 2           |
| hypothetical Intradiol ring-cleavage dioxygenase/WD40-like containing protein                                                  | Q3UHA3        | R.YNEMTY@IFDLLHQK.H                                                                       | Y2161                | N   | U   | 10                | 1           | 1   | 2.51                 | 2           |
| MKIAA1686 protein [fragment]                                                                                                   | Q6ZPK1        | K.ERPISMINEASNY@NMASDY@AVHPMSPVGR.T                                                       | Y65,Y71              | Y,Y | U,U | 2,3               | 2           | 2,2 | 3.77                 | 3           |
| PREDICTED: similar to Oligophrenin 1                                                                                           | UPI00005125B7 | K.LWLEAMDGKEPIY@TLP AISK.K<br>R.KLWLEAM#DGKEPIY@TLP AISK.K<br>R.KLWLEAMDGKEPIY@TLP AISK.K | Y371<br>Y371<br>Y371 | Y   | C   | 2,3<br>4<br>2,4,5 | 2<br>1<br>3 | 6   | 4.05<br>4.81<br>4.28 | 3<br>3<br>3 |
| PREDICTED: similar to zinc finger CCCH type containing 11A isoform 1                                                           | UPI00001C484B | R.IPFS@KTY@SKTEK.V                                                                        | Y399                 | Y   | U   | 1,2               | 2           | 2   | 4.02                 | 2           |
| Protein KIAA1914                                                                                                               | Q5DTU0        | K.VAQQLSLVGC*DVLDPDPSDHLI@SFR.I                                                           | Y413                 | Y   | U   | 1,3               | 2           | 2   | 3.96                 | 3           |
| Similar to RIKEN cDNA 4930527D15 gene [fragment]                                                                               | Q922B5        | K.EKLLLC*HGPS@LSPALSGVRY@NAEK.K                                                           | Y39                  | Y   | C   | 6                 | 1           | 1   | 3.23                 | 3           |

**END**

**Table S1. Phosphotyrosine sites from the nontransformed mouse embryo fibroblast population**

| Protein Name(s) <sup>a</sup>                                  | UniProt # <sup>a</sup> | Peptide <sup>b</sup>                                                                                                                                                                                                                                                                                                                                                                                                                                                                                                               | pY site(s) <sup>b</sup>                                                                                                                                                                                                                                                                                         | MH <sup>h</sup>                                                                                                                                                                                                                                                      | dM <sup>h</sup>                                                                                                                                                                                   | dCn 2nd ranked peptide <sup>i</sup>                                                                                                                                                                                                                                                                                                                                                                                                                                                                                                                                                                                                                                          |
|---------------------------------------------------------------|------------------------|------------------------------------------------------------------------------------------------------------------------------------------------------------------------------------------------------------------------------------------------------------------------------------------------------------------------------------------------------------------------------------------------------------------------------------------------------------------------------------------------------------------------------------|-----------------------------------------------------------------------------------------------------------------------------------------------------------------------------------------------------------------------------------------------------------------------------------------------------------------|----------------------------------------------------------------------------------------------------------------------------------------------------------------------------------------------------------------------------------------------------------------------|---------------------------------------------------------------------------------------------------------------------------------------------------------------------------------------------------|------------------------------------------------------------------------------------------------------------------------------------------------------------------------------------------------------------------------------------------------------------------------------------------------------------------------------------------------------------------------------------------------------------------------------------------------------------------------------------------------------------------------------------------------------------------------------------------------------------------------------------------------------------------------------|
| <b>SIGNALING: PROTEIN KINASES AND PHOSPHATASES</b>            |                        |                                                                                                                                                                                                                                                                                                                                                                                                                                                                                                                                    |                                                                                                                                                                                                                                                                                                                 |                                                                                                                                                                                                                                                                      |                                                                                                                                                                                                   |                                                                                                                                                                                                                                                                                                                                                                                                                                                                                                                                                                                                                                                                              |
| <b>Tyrosine kinases (nonreceptor)</b>                         |                        |                                                                                                                                                                                                                                                                                                                                                                                                                                                                                                                                    |                                                                                                                                                                                                                                                                                                                 |                                                                                                                                                                                                                                                                      |                                                                                                                                                                                                   |                                                                                                                                                                                                                                                                                                                                                                                                                                                                                                                                                                                                                                                                              |
| Proto-oncogene tyrosine-protein kinase -- Src (Yes, Fyn, Hck) | Q80XU2                 | R.LIEDNEY@TAR.Q<br>F.LEDYFTSTEPQY@QPGENL.-<br>Y.FTSTEPQY@QPGENL.-                                                                                                                                                                                                                                                                                                                                                                                                                                                                  | Y418<br>Y529<br>Y529                                                                                                                                                                                                                                                                                            | 1304.00<br>2211.47<br>1692.24                                                                                                                                                                                                                                        | 0.41<br>0.52<br>1.50                                                                                                                                                                              | 0.0714 R.LIEDNEY@TAR.Q<br>none<br>none                                                                                                                                                                                                                                                                                                                                                                                                                                                                                                                                                                                                                                       |
| Proto-oncogene tyrosine-protein kinase -- Fyn (Yes)           | P39688                 | R.KLDNGGYY@ITTR.A<br>F.LEDYFTATEPQY@QPGENL.-<br>F.TATEPQY@QPGENL.-<br>Y.FTATEPQY@QPGENL.-                                                                                                                                                                                                                                                                                                                                                                                                                                          | Y213<br>Y527<br>Y527<br>Y527                                                                                                                                                                                                                                                                                    | 1481.13<br>2196.52<br>1528.09<br>1676.10                                                                                                                                                                                                                             | 0.40<br>1.56<br>0.42<br>1.36                                                                                                                                                                      | 0.0107 R.KLDNGGYY@ITTR.A<br>none<br>none<br>none                                                                                                                                                                                                                                                                                                                                                                                                                                                                                                                                                                                                                             |
| Fyn-related kinase -- Frk                                     | Q922K9                 | F.C*PPEAPRSQEPERSHGQY@F.V<br>R.SQEPERSHGQY@FVALFDYQAR.T<br>K.LEDYFETDC*SY@SDTNNFIN.-<br>W.KLEDYFETDC*SY@SDTNNFIN.-<br>W.KLEDYFETDCS@Y@SDTNNFIN.-                                                                                                                                                                                                                                                                                                                                                                                   | Y53<br>Y53<br>Y504<br>Y504<br>Y504                                                                                                                                                                                                                                                                              | 2352.86<br>2608.70<br>2426.95<br>2555.44<br>2557.37<br>2578.11                                                                                                                                                                                                       | 0.86<br>0.50<br>0.04<br>0.43<br>2.35<br>0.10                                                                                                                                                      | 0.1624 F.C*PPEAPRSQEPERS@HGQYF.V<br>0.1015 R.SQEPERS@HGQYFVALFDYQAR.T<br>0.0522 K.LEDYFETDC*S@SDTNNFIN.-<br>0.0306 W.KLEDYFETDC*S@SDTNNFIN.-<br>0.0340 W.KLEDYFETDC*S@SDTNNFIN.-<br>0.0670 W.KLEDYFETDCS@YS@DTNNFIN.-                                                                                                                                                                                                                                                                                                                                                                                                                                                        |
| Fer                                                           | P70451                 | K.VQENDGKEPPVNY@EEDAR.S<br>F.GMSRQEDGGVY@SSGL.K                                                                                                                                                                                                                                                                                                                                                                                                                                                                                    | Y402<br>Y715                                                                                                                                                                                                                                                                                                    | 2366.97<br>1710.37                                                                                                                                                                                                                                                   | 1.90<br>0.65                                                                                                                                                                                      | none<br>0.1358 F.GMSRQEDGGVY@SSGL.K                                                                                                                                                                                                                                                                                                                                                                                                                                                                                                                                                                                                                                          |
| Proto-oncogene tyrosine-protein kinase ABL1                   | P00520                 | M.TGDTY@TAHAGAKFPIKW.T<br>R.LMTGDTY@TAHAGAK.F                                                                                                                                                                                                                                                                                                                                                                                                                                                                                      | Y393<br>Y393                                                                                                                                                                                                                                                                                                    | 1944.63<br>1517.51                                                                                                                                                                                                                                                   | 0.69<br>0.83                                                                                                                                                                                      | 0.0372 M.TGDTY@AHAGAKFPIKW.T<br>0.1036 R.LMTGDTY@TAHAGAK.F                                                                                                                                                                                                                                                                                                                                                                                                                                                                                                                                                                                                                   |
| Activated CDC42 kinase 1 -- ACK                               | O54967                 | M.RALPQNDHY@VMQEH.R<br><br>W.DARLPPPPAY@DDVAQEDDFE<br>F.ASDPKY@ATPQVIQAPGRAGPC*.I<br>K.VSSTHY@YLLPERPPYLER.Y<br>R.KVSSTHY@YLLPERPPYLER.Y<br>R.KVSS@THYY@LLPERPPYLER.Y                                                                                                                                                                                                                                                                                                                                                              | Y284<br><br>Y650<br>Y842<br>Y874<br>Y874<br>Y875                                                                                                                                                                                                                                                                | 1933.78<br>1933.29<br>2425.38<br>2362.09<br>2301.01<br>2429.74<br>2509.73                                                                                                                                                                                            | 0.94<br>0.45<br>2.34<br>0.97<br>0.87<br>1.50<br>1.49                                                                                                                                              | none<br>none<br>0.0254 F.AS@DPKYATPQVIQAPGRAGPC*.I<br>0.0723 K.VSSTHY@LLPERPPYLER.Y<br>0.0733 R.KVSST@HYLLPERPPYLER.Y<br>0.0046 R.KVSSTHY@Y@LLPERPPYLER.Y                                                                                                                                                                                                                                                                                                                                                                                                                                                                                                                    |
| Activated CDC42 kinase 1 -- ACK, isoforms 2 and 3             | O54967-2               | H.LGRVKKPTY@DPVSEDPDPLSSDF.K<br>K.KPTY@DPVSEDPDPLSSDFK.R.L<br>L.GRVKKPTY@DPVSEDPDPLSSDF.K<br>R.VKKPTY@DPVSEDPDPLSSDFK.R<br>R.VKKPTY@DPVSEDPDPLSSDFK.R.L                                                                                                                                                                                                                                                                                                                                                                            | Y518<br>Y518<br>Y518<br>Y518<br>Y518                                                                                                                                                                                                                                                                            | 2642.93<br>2374.59<br>2529.88<br>2446.27<br>2601.34                                                                                                                                                                                                                  | 0.66<br>1.49<br>0.69<br>2.11<br>1.08                                                                                                                                                              | 0.0150 H.LGRVKKPT@YDPVSEDPDPLSSDF.K<br>0.0228 K.KPT@YDPVSEDPDPLSSDFK.R.L<br>0.0319 L.GRVKKPT@YDPVSEDPDPLSSDF.K<br>0.0007 R.VKKPT@YDPVSEDPDPLSSDFK.R<br>0.0025 R.VKKPT@YDPVSEDPDPLSSDFK.R.L                                                                                                                                                                                                                                                                                                                                                                                                                                                                                   |
| Focal adhesion kinase, isoform 3 -- FAK                       | P34152-3               | M.RTHAVSVSETDDY@AEIIDEEDTY.T<br><br>R.THAVSVSETDDY@AEIIDEEDTYTMPSTR.D<br>R.Y@MEDSTY@YK.A<br>R.Y@MEDSTY@YKASK.G<br>R.Y@MEDSTY@Y@KASK.G<br>F.GLSRYM#EDSTY@Y.K<br>F.GLSRYM#EDSTY@Y.K<br>L.GDFGLSRYM#EDSTY@Y.K<br>L.GDFGLSRYM#EDSTY@Y.K<br>R.YM#EDST@YY@KASK.G<br>R.YM#EDSTY@Y@K.A<br>R.YM#EDSTY@Y@KASK.G<br>R.YM#EDSTY@YK.A<br>R.YM#EDSTY@YKASK.G<br>R.YM#EDSTY@Y@K.A<br>R.YMEDSTY@Y@K.A<br>R.YMEDSTY@Y@KASK.G<br>R.YMEDSTY@YK.A<br><br>R.YMEDSTY@YKASK.G<br>R.YMEDSTY@Y@K.A<br>Y.M#EDSTY@Y@KASKGKLIPIK.W<br>Y.MEDSTY@Y@KASKGKLIPIK.W | Y397<br><br>Y397<br>Y570,Y576<br>Y570,Y576<br>Y570,Y576,Y577<br>Y576<br>Y576<br>Y576<br>Y576<br>Y576<br>Y577<br>Y576,Y577<br>Y576,Y577<br>Y576<br>Y576<br>Y577<br>Y576,Y577<br>Y576<br>Y576<br>Y577<br>Y576,Y577<br>Y576,Y577<br>Y576<br>Y576<br>Y577<br>Y576,Y577<br>Y576<br>Y576<br>Y577<br>Y576,Y577<br>Y576 | 2738.87<br>2739.94<br>3256.66<br>1359.75<br>1645.52<br>1725.34<br>1581.12<br>1565.84<br>1900.27<br>1883.90<br>1661.93<br>1375.66<br>1662.03<br>1296.10<br>1581.58<br>1296.09<br>1359.28<br>1646.24<br>1279.92<br>1280.38<br>1566.08<br>1279.12<br>2322.87<br>2305.61 | 0.70<br>1.76<br>1.27<br>0.26<br>-0.14<br>-0.32<br>0.48<br>1.20<br>0.52<br>0.14<br>0.26<br>0.17<br>0.37<br>0.61<br>-0.08<br>0.60<br>-0.21<br>0.58<br>0.43<br>0.89<br>0.42<br>-0.37<br>1.77<br>0.51 | none<br>none<br>0.0605 R.THAVSVSET@DDYAEIIDEEDTYTMPSTR.D<br>0.1144 R.Y@MEDST@YK.A<br>0.0743 R.Y@MEDST@YKASK.G<br>0.0530 R.Y@MEDST@Y@KASK.G<br>0.1391 F.GLSRYM#EDST@YK.K<br>0.1660 F.GLSRYM#EDST@YK.K<br>0.0740 L.GDFGLSRYM#EDST@YK.K<br>0.1288 L.GDFGLSRYM#EDST@YK.K<br>0.0032 R.YM#EDSTY@Y@KASK.G<br>0.0687 R.YM#EDST@Y@K.A<br>0.0785 R.YM#EDST@Y@KASK.G<br>0.0660 R.YM#EDSTY@Y@K.A<br>0.0059 R.YM#EDST@YKASK.G<br>0.0690 R.YM#EDSTY@YK.A<br>0.0628 R.YMEDST@Y@K.A<br>0.1020 R.YMEDST@Y@KASK.G<br>0.0734 R.YMEDSTY@Y@K.A<br>0.0088 R.YMEDSTY@Y@K.A<br>0.0447 R.YMEDST@YKASK.G<br>0.0949 R.YMEDSTY@YK.A<br>0.0124 Y.M#EDST@Y@KASKGKLIPIK.W<br>0.0572 Y.MEDST@Y@KASKGKLIPIK.W |
| Tyrosine-protein kinase JAK1                                  | P52332                 | K.AIETDKEY@Y@TVKDDR.D                                                                                                                                                                                                                                                                                                                                                                                                                                                                                                              | Y1033,Y1034                                                                                                                                                                                                                                                                                                     | 2006.36                                                                                                                                                                                                                                                              | 0.47                                                                                                                                                                                              | 0.1350 K.AIETDKEY@Y@TVKDDR.D                                                                                                                                                                                                                                                                                                                                                                                                                                                                                                                                                                                                                                                 |
| <b>Tyrosine kinases (receptor)</b>                            |                        |                                                                                                                                                                                                                                                                                                                                                                                                                                                                                                                                    |                                                                                                                                                                                                                                                                                                                 |                                                                                                                                                                                                                                                                      |                                                                                                                                                                                                   |                                                                                                                                                                                                                                                                                                                                                                                                                                                                                                                                                                                                                                                                              |
| Discoidin domain receptor 2 precursor -- DDR2                 | Q62371                 | R.IFPLRPDY@QEPSR.L<br>Y.DRIFPLRPDY@QEPSRL.I<br>R.NLY@SGDY@YR.I                                                                                                                                                                                                                                                                                                                                                                                                                                                                     | Y481<br>Y481<br>Y735,Y739                                                                                                                                                                                                                                                                                       | 1698.03<br>2082.93<br>1310.97                                                                                                                                                                                                                                        | 0.19<br>0.88<br>0.44                                                                                                                                                                              | none<br>0.1556 Y.DRIFPLRPDYQEPS@RL.I<br>0.1549 R.NLY@SGDY@YR.I                                                                                                                                                                                                                                                                                                                                                                                                                                                                                                                                                                                                               |
| Ephrin type-A receptor 2 precursor -- EphA2                   | Q03145                 | K.SEQLKPLKTY@VDPHTYEDPNQAVLK.F                                                                                                                                                                                                                                                                                                                                                                                                                                                                                                     | Y589                                                                                                                                                                                                                                                                                                            | 2995.38                                                                                                                                                                                                                                                              | 1.88                                                                                                                                                                                              | 0.0360 K.SEQLKPLKT@YVDPHTYEDPNQAVLK.F                                                                                                                                                                                                                                                                                                                                                                                                                                                                                                                                                                                                                                        |

|                                                                 |        |                                                                                                                                                                                                                                                                                                                 |                                                                                                                   |                                                                                                                                                                                         |                                                                                                                                        |                                                                                                                                                                                                                                                                                                                                                                                                                                     |
|-----------------------------------------------------------------|--------|-----------------------------------------------------------------------------------------------------------------------------------------------------------------------------------------------------------------------------------------------------------------------------------------------------------------|-------------------------------------------------------------------------------------------------------------------|-----------------------------------------------------------------------------------------------------------------------------------------------------------------------------------------|----------------------------------------------------------------------------------------------------------------------------------------|-------------------------------------------------------------------------------------------------------------------------------------------------------------------------------------------------------------------------------------------------------------------------------------------------------------------------------------------------------------------------------------------------------------------------------------|
|                                                                 |        | L.KTY@VDPHTYEDPNQAVL.K<br>L.KTY@VDPHT@YEDPNQAVL.K<br>K.SEQLKPLKT@YVDPHTY@EDPNQAVL.K.F<br>K.TYVDPHTY@EDPNQAVL.K.F                                                                                                                                                                                                | Y589<br>Y589<br>Y595<br>Y595                                                                                      | 2070.37<br>2150.60<br>3073.16<br>2071.96                                                                                                                                                | 0.40<br>0.64<br>-0.34<br>2.00                                                                                                          | 0.0405 L.KT@YVDPHTYEDPNQAVL.K<br>0.0001 L.KTY@VDPHTY@EDPNQAVL.K<br>0.0182 K.SEQLKPLKT@YVDPHT@YEDPNQAVL.K.F<br>0.0577 K.TYVDPHT@YEDPNQAVL.K.F                                                                                                                                                                                                                                                                                        |
|                                                                 |        | L.KTYVDPHTY@EDPNQAVL.K<br>L.KTY@VDPHTY@EDPNQAVL.K<br>F.GLSRVLEDDPEATY@TSSGGKPIRW.T<br>L.SRVLEDDPEATY@TSSGGKPIRW.T<br>R.VLEDDPEATY@TSSGGK.I<br>R.VLEDDPEATY@TSSGGKPIRW.W                                                                                                                                         | Y595<br>Y589,Y595<br>Y773<br>Y773<br>Y773                                                                         | 2070.45<br>2150.41<br>2842.81<br>2672.86<br>1763.39<br>2243.67                                                                                                                          | 0.49<br>0.45<br>1.39<br>1.55<br>0.61<br>1.57                                                                                           | 0.0406 K.TYVDPHT@YEDPNQAVL.K.F<br>0.0514 L.KTYVDPHT@YEDPNQAVL.K<br>0.0115 L.KTY@VDPHT@YEDPNQAVL.K<br>0.1130 F.GLSRVLEDDPEAT@YTSSGGKPIRW.T<br>0.0979 L.SRVLEDDPEAT@YTSSGGKPIRW.T<br>0.0487 R.VLEDDPEATY@TSSGGK.I<br>0.0574 R.VLEDDPEAT@YTSSGGKPIRW.W                                                                                                                                                                                 |
| Ephrin type-A receptor 3 precursor -- EphA3 (EphA4, EphA5)      | P29319 | R.VLEDDPEAAY@TTR.G                                                                                                                                                                                                                                                                                              | Y779                                                                                                              | 1560.19                                                                                                                                                                                 | 0.49                                                                                                                                   | 0.1136 R.VLEDDPEAAY@TR.G                                                                                                                                                                                                                                                                                                                                                                                                            |
| Ephrin type-A receptor 4 precursor -- EphA4                     | Q03137 | Y.VDPFTY@EDPNQAVREF.A                                                                                                                                                                                                                                                                                           | Y602                                                                                                              | 2007.98                                                                                                                                                                                 | 1.09                                                                                                                                   | 0.0647 Y.VDPFT@YEDPNQAVREF.A                                                                                                                                                                                                                                                                                                                                                                                                        |
| Ephrin type-A receptor 5 precursor -- EphA5                     | Q60629 | R.TY@IDPHTY@EDPNQAVHEFAK.E                                                                                                                                                                                                                                                                                      | Y489,Y495                                                                                                         | 2537.07                                                                                                                                                                                 | 1.98                                                                                                                                   | 0.0004 R.T@YIDPHTY@EDPNQAVHEFAK.E                                                                                                                                                                                                                                                                                                                                                                                                   |
| Ephrin type-B receptor 2 precursor -- EphB2 (EphB1)             | P54763 | K.IY@IDPFTY@EDPNEAVR.E<br>Y.IDPFTY@EDPNEAVREF.A                                                                                                                                                                                                                                                                 | Y604,Y610<br>Y610                                                                                                 | 2102.82<br>2023.15                                                                                                                                                                      | 0.90<br>1.26                                                                                                                           | 0.0742 K.IY@IDPFT@YEDPNEAVR.E<br>0.0643 Y.IDPFT@YEDPNEAVREF.A                                                                                                                                                                                                                                                                                                                                                                       |
| Ephrin type-B receptor 3 precursor -- EphB3 (EphB4)             | P54754 | K.VY@IDPFTY@EDPNEAVR.E<br>K.VYIDPFTY@EDPNEAVR.E<br>R.FLEDDPSDPTY@TSSGGKPIRW.W                                                                                                                                                                                                                                   | Y603,Y609<br>Y609<br>Y787                                                                                         | 2088.96<br>2008.83<br>2490.03                                                                                                                                                           | 1.05<br>0.91<br>1.83                                                                                                                   | 0.0718 K.VY@IDPFT@YEDPNEAVR.E<br>0.0715 K.VYIDPFT@YEDPNEAVR.E<br>0.0162 R.FLEDDPSDPT@YTSSGGKPIRW.W                                                                                                                                                                                                                                                                                                                                  |
| Eph receptor B4 -- EphB4                                        | Q91YM0 | K.HGQYLIGHGTVKY@IDPFTY@EDPNEAVR.E<br>K.HGQYLIGHGT*KVYIDPFTY@EDPNEAVR.E<br>Y.LIGHGTVKY@IDPFTY@EDPNEAVREF.A<br>R.FLEENSS@DPTY@TSSGGKPIRW.W<br>R.FLEENSSDPTY@TSSGGKPIRW.W                                                                                                                                          | Y590,Y596<br>Y596<br>Y590,Y596<br>Y774<br>Y774                                                                    | 3281.88<br>3182.37<br>3072.78<br>2572.64<br>2492.06                                                                                                                                     | 2.36<br>0.84<br>2.35<br>1.43<br>0.85                                                                                                   | 0.0441 K.HGQYLIGHGTVKY@IDPFT@YEDPNEAVR.E<br>0.0078 K.HGQYLIGHGT*KVYIDPFT@YEDPNEAVR.E<br>0.0265 Y.LIGHGT@KVYIDPFTY@EDPNEAVREF.A<br>0.0545 R.FLEENSS@DPTY@TSSGGKPIRW.W<br>0.0189 R.FLEENSSDPT@YTSSGGKPIRW.W                                                                                                                                                                                                                           |
| Hepatocyte growth factor receptor precursor -- MET              | P16056 | F.GLARDMYDKEY@Y.S<br>F.GLARDMYDKEY@Y.S<br>R.DM#YDKEY@Y@SVHNK.T<br>R.DM#YDKEY@YS@VHNK.T<br>R.DM#YDKEY@YSVHNK.T<br>R.DMYDKEY@Y@SVHNK.T<br><br>R.DMYDKEY@Y@SVHNKTGAK.L<br>R.DMYDKEY@YSVHNK.T<br><br>R.DMYDKEY@YSVHNKT*GAK.L<br>R.DMYDKEY@YS^VHNK.T<br>R.DMYDKEY@SVHNK.T<br><br>R.DMYDKEY@SVHNKT*GAK.L              | Y1232<br>Y1233<br>Y1232,Y1233<br>Y1232<br>Y1232<br>Y1232,Y1233<br>Y1232,Y1233<br>Y1232<br>Y1232<br>Y1233<br>Y1233 | 1603.92<br>1604.02<br>1869.85<br>1869.06<br>1789.90<br>1852.08<br>1851.99<br>2209.76<br>1772.51<br>1772.16<br>2111.19<br>1753.71<br>1772.24<br>1772.72<br>2111.23                       | 0.24<br>0.34<br>2.11<br>1.32<br>2.16<br>0.34<br>0.25<br>0.82<br>0.77<br>0.42<br>0.24<br>-0.03<br>0.50<br>0.98<br>0.29                  | 0.1510 F.GLARDMYDKEY@Y.S<br>0.0089 F.GLARDMYDKEY@Y.S<br>0.1228 R.DM#YDKEY@YS@VHNK.T<br>0.0804 R.DM#YDKEY@Y@SVHNK.T<br>0.1726 R.DM#YDKEY@YSVHNK.T<br>0.1298 R.DMYDKEY@YS@VHNK.T<br>0.0430 R.DMYDKEY@YS@VHNK.T<br>0.1138 R.DMYDKEY@YS@VHNKTGAK.L<br>0.1319 R.DMYDKEY@SVHNK.T<br>0.1225 R.DMYDKEY@SVHNK.T<br>0.0297 R.DMYDKEY@SVHNKT*GAK.L<br>0.0180 R.DMYDKEY@YSVHNK.T<br>0.0029 R.DMYDKEY@YSVHNK.T<br>0.0008 R.DMYDKEY@YSVHNKT*GAK.L |
| Insulin-like growth factor 1 receptor precursor -- IGF1R (InsR) | Q60751 | R.DIY@ETDY@Y@RK.G<br>R.DIY@ETDY@YRK.G<br>R.DIYETDY@YR.K<br>R.DIYETDY@YRK.G                                                                                                                                                                                                                                      | Y1163,<br>Y1167,Y1168<br>Y1163, Y1167<br>Y1167<br>Y1168                                                           | 1605.90<br>1525.89<br>1318.97<br>1445.90                                                                                                                                                | 0.27<br>0.26<br>1.43<br>0.27                                                                                                           | none<br>0.0862 R.DIY@ETDYY@RK.G<br>0.1814 R.DIYET@DYR.K<br>0.0426 R.DIYETDY@YRK.G                                                                                                                                                                                                                                                                                                                                                   |
| Proto-oncogene tyrosine-protein kinase -- MER                   | Q60805 | K.KIY@SGDY@YR.Q<br>K.KIYSGDY@YR.Q                                                                                                                                                                                                                                                                               | Y744,Y748<br>Y748                                                                                                 | 1324.91<br>1245.94                                                                                                                                                                      | 0.34<br>1.37                                                                                                                           | 0.1269 K.KIY@SGDYY@R.Q<br>0.0651 K.KIYSGDYY@R.Q                                                                                                                                                                                                                                                                                                                                                                                     |
| Tyrosine-protein kinase receptor UFO precursor -- Axl           | Q00993 | F.GLSKKIYNGDY@YR<br>K.KIYNGDY@YR.Q<br>K.IYNGDY@YR.Q<br>K.IYNGDYY@R.Q<br>F.GLSKKIYNGDYY@R                                                                                                                                                                                                                        | Y696<br>Y696<br>Y696<br>Y697<br>Y697                                                                              | 1500.39<br>1272.10<br>1144.07<br>1144.49<br>1501.45                                                                                                                                     | -0.32<br>0.52<br>0.59<br>1.01<br>0.74                                                                                                  | 0.0505 F.GLSKKIYNGDYY@R<br>0.1473 K.KIYNGDYY@R.Q<br>0.0634 K.IYNGDYY@R.Q<br>0.0051 K.IYNGDY@YR.Q<br>0.0489 F.GLSKKIYNGDY@YR                                                                                                                                                                                                                                                                                                         |
| <b>Other protein kinases</b>                                    |        |                                                                                                                                                                                                                                                                                                                 |                                                                                                                   |                                                                                                                                                                                         |                                                                                                                                        |                                                                                                                                                                                                                                                                                                                                                                                                                                     |
| CDC2: Cell division control protein 2 homolog - CDK1 (CDK2)     | P11440 | K.IEKIGEGT@Y@GVVYK.G<br><br>K.IEKIGEGTY@GVVYK<br>K.IEKIGEGTY@GVVYK.G<br><br>K.IEKIGEGT*Y@GVVYK.G<br><br>K.IGEGT@Y@GVVYK.G<br>K.IGEGTY@GVVYK.G<br><br>K.IGEGTY@GVVYKGR.H<br>K.IGEGT*Y@GVVYK.G<br>K.IGEGT*Y@GVVYKGR.H<br>Y.IKIEKIGEGTY@GVVYK<br>Y.IKIEKIGEGT*Y@GVVYK<br>-.DYIKIEKIGEGTY@GVVYK<br>K.IGEGTYGVVY@K.G | Y15<br><br>Y15<br>Y15<br><br>Y15<br>Y15<br><br>Y15<br>Y15<br>Y15<br>Y15<br>Y15<br>Y15<br>Y15<br>Y15<br>Y19        | 1717.27<br>1715.77<br>1508.18<br>1636.64<br>1635.95<br>1619.00<br>1618.12<br>1346.16<br>1267.13<br>1265.57<br>1479.08<br>1248.01<br>1462.31<br>1749.38<br>1730.66<br>2027.54<br>1266.15 | 1.43<br>-0.07<br>0.44<br>0.80<br>0.11<br>1.16<br>0.28<br>0.54<br>1.51<br>-0.05<br>0.34<br>0.39<br>1.57<br>0.46<br>0.26<br>0.53<br>0.53 | none<br>none<br>0.0734 K.IEKIGEGT@YGVVYK<br>0.0541 K.IEKIGEGT@YGVVYK.G<br>0.0489 K.IEKIGEGT@YGVVYK.G<br>none<br>none<br>0.0888 K.IGEGT@YGVVYK.G<br>0.1021 K.IGEGT@YGVVYK.G<br>0.0572 K.IGEGT@YGVVYKGR.H<br>none<br>none<br>0.0942 Y.IKIEKIGEGT@YGVVYK<br>none<br>0.0803 -.DYIKIEKIGEGT@YGVVYK<br>0.1207 K.IGEGTY@YGVVYK.G                                                                                                           |
| Cell division protein kinase 2 -- CDK2                          | P97377 | K.VEKIGEGTY@GVVYK.A                                                                                                                                                                                                                                                                                             | Y15                                                                                                               | 1622.96<br>1622.35                                                                                                                                                                      | 1.14<br>0.53                                                                                                                           | 0.0922 K.VEKIGEGT@YGVVYK.A<br>0.0411 K.VEKIGEGT@YGVVYK.A                                                                                                                                                                                                                                                                                                                                                                            |

|                                                                                   |        |                                                                                                                                                                                                                                                                                                                                                                                                                                                                 |                                                                                                                  |                                                                                                                                                                              |                                                                                                                              |                                                                                                                                                                                                                                                                                                                                                                                                                                                                 |
|-----------------------------------------------------------------------------------|--------|-----------------------------------------------------------------------------------------------------------------------------------------------------------------------------------------------------------------------------------------------------------------------------------------------------------------------------------------------------------------------------------------------------------------------------------------------------------------|------------------------------------------------------------------------------------------------------------------|------------------------------------------------------------------------------------------------------------------------------------------------------------------------------|------------------------------------------------------------------------------------------------------------------------------|-----------------------------------------------------------------------------------------------------------------------------------------------------------------------------------------------------------------------------------------------------------------------------------------------------------------------------------------------------------------------------------------------------------------------------------------------------------------|
| Dual-specificity tyrosine-phosphorylation regulated kinase 1A -- DYRK1A (DYRK1B)  | Q61214 | K.VYNDGYDDDN@DYIVK.N<br>R.KVYNDGYDDDN@DYIVK.N<br><br>R.KVYNDGYDDDN@DYIVKNGEK.W<br>Y.NDGYDDDN@DYIVKNGEK.W.M<br><br>R.IYQY@IQSR.F<br>Y.QY@IQSRFY.R                                                                                                                                                                                                                                                                                                                | Y145<br>Y145<br><br>Y145<br>Y145<br><br>Y321<br>Y321                                                             | 2052.45<br>2180.67<br>2180.63<br>2609.03<br>2404.62<br>2403.40<br><br>1151.37<br>1186.05                                                                                     | 1.62<br>1.75<br>1.71<br>1.90<br>1.64<br>0.42<br><br>0.81<br>1.50                                                             | none<br>0.1039 R.KVYNDGYDDDN@DYIVK.N<br>0.1337 R.KVYNDGYDDDN@DYIVK.N<br>none<br>0.1351 Y.NDGY@DDDN@DYIVKNGEK.W.M<br>0.1520 Y.NDGYDDDN@DYIVKNGEK.W.M<br><br>none<br>none                                                                                                                                                                                                                                                                                         |
| Glycogen synthase kinase-3 beta -- GSK-3beta (GSK3alpha)                          | Q9WV60 | K.QLVRGEPNVS@IC*SR.Y<br>K.QLVRGEPNVS@IC*SR.Y.R<br>L.VRGEPNVS@IC*.S<br>L.VRGEPNVS@IC*S@RYY.R<br>L.VRGEPNVS@IC*SR.Y<br><br>L.VRGEPNVS@IC*SR.Y.R<br><br>L.VRGEPNVS@IC*S*RY.Y<br>N.VSY@IC*SR.Y<br>N.VSY@IC*SR.Y.R<br>Q.LVRGEPNVS@IC*SR.Y<br><br>Q.LVRGEPNVS@IC*SR.Y.R<br>R.GEPNVS@IC*SR.Y<br>R.GEPNVS@IC*SR.Y.R                                                                                                                                                     | Y216<br>Y216<br>Y216<br>Y216<br>Y216<br><br>Y216<br><br>Y216<br>Y216<br>Y216<br>Y216<br><br>Y216<br>Y216<br>Y216 | 2021.36<br>2184.56<br>1374.19<br>2023.70<br>1781.23<br>1780.21<br>1944.89<br>1943.20<br>1762.02<br>1129.07<br>1291.21<br>1894.43<br>1893.13<br>2056.41<br>1363.40<br>1688.41 | 0.42<br>0.55<br>0.59<br>0.84<br>1.43<br>0.41<br>2.03<br>0.34<br>0.22<br>1.60<br>0.68<br>1.55<br>0.25<br>0.46<br>1.83<br>0.72 | 0.1148 K.QLVRGEPNVS@YIC*SR.Y<br>0.0356 K.QLVRGEPNVS@YIC*SR.Y.R<br>0.1286 L.VRGEPNVS@YIC*.S<br>0.0640 L.VRGEPNVS@YIC*SR.Y.R<br>0.1098 L.VRGEPNVS@YIC*SR.Y<br>0.0264 L.VRGEPNVS@YIC*SR.Y<br>0.1177 L.VRGEPNVS@YIC*SR.Y.R<br>0.0594 L.VRGEPNVS@YIC*SR.Y.R<br>0.1013 L.VRGEPNVS@YIC*S*RY.Y<br>none<br>none<br>0.1234 Q.LVRGEPNVS@YIC*SR.Y<br>0.0042 Q.LVRGEPNVS@YIC*SR.Y<br>0.1617 Q.LVRGEPNVS@YIC*SR.Y.R<br>0.0889 R.GEPNVS@YIC*SR.Y<br>0.0826 R.GEPNVS@YIC*SR.Y.R |
| Homeodomain-interacting protein kinase 1 -- HIPK1 (HIPK2)                         | O88904 | H.VSKAVC*STY@LQSR.Y<br><br>K.AVC*STY@LQSR.Y<br>S.KAVC*STY@LQSR.Y                                                                                                                                                                                                                                                                                                                                                                                                | Y352<br><br>Y352<br>Y352                                                                                         | 1742.55<br>1742.42<br>1264.64<br>1557.06                                                                                                                                     | 0.74<br>0.61<br>0.09<br>1.35                                                                                                 | 0.1304 H.VSKAVC*ST@YLQSR.Y<br>0.0391 H.VSKAVC*ST@YLQSR.Y<br>0.1095 K.AVC*ST@YLQSR.Y<br>0.0866 S.KAVC*ST@YLQSR.Y                                                                                                                                                                                                                                                                                                                                                 |
| Homeodomain-interacting protein kinase 3 -- HIPK3                                 | Q9ERH7 | H.VSKTVC*STY@L.Q<br>H.VSKTVC*STY@LQSR.Y<br><br>K.TVC*STY@LQSR.Y                                                                                                                                                                                                                                                                                                                                                                                                 | Y359<br>Y359<br><br>Y359                                                                                         | 1237.96<br>1773.71<br>1772.23<br>1294.81                                                                                                                                     | 0.39<br>1.89<br>0.41<br>0.25                                                                                                 | 0.1771 H.VSKTVC*ST@YL.Q<br>0.0008 H.VSKTVC*STY@LQSR.Y<br>0.1302 H.VSKTVC*ST@YLQSR.Y<br>0.0907 K.TVC*ST@YLQSR.Y                                                                                                                                                                                                                                                                                                                                                  |
| Hypothetical Protein kinase-like (PK-like) structure containing protein -- Sgk223 | Q8CB68 | K.C*VGQAAELQPASLLRDPVQPEPIY@AESAK.R<br>K.C*VGQAAELQPASLLRDPVQPEPIY@AESAK.R                                                                                                                                                                                                                                                                                                                                                                                      | Y196<br>Y196                                                                                                     | 3219.49<br>3375.94                                                                                                                                                           | 1.92<br>2.27                                                                                                                 | 0.0171 K.C*VGQAAELQPASLLRDPVQPEPIY@AESAK.R<br>0.0315 K.C*VGQAAELQPASLLRDPVQPEPIY@AESAK.R                                                                                                                                                                                                                                                                                                                                                                        |
| Mitogen-activated protein kinase 3 -- ERK1                                        | Q63844 | F.GLARIADPEHDHTGFLT@EY@VATRW.Y<br>F.GLARIADPEHDHTGFLT@EY@VATRW.Y<br>F.GLARIADPEHDHTGFLT*EY@VATRW.Y<br>F.GLARIADPEHDHTGFLT*EY@VATRW.Y<br>F.GLARIADPEHDHTGFLT*EY@VATRW.Y<br>F.LTEY@VATRW.Y<br>R.IADPEHDHTGFLT@EY@VATR.W<br>R.IADPEHDHTGFLT@EY@VATR.W<br>R.IADPEHDHTGFLT*EY@VATR.W                                                                                                                                                                                 | Y205<br>Y205<br>Y205<br>Y205<br>Y205<br>Y205<br>Y205<br>Y205<br>Y205                                             | 2916.59<br>2836.39<br>2818.73<br>2981.12<br>1219.17<br>2333.65<br>2253.54<br>2234.94                                                                                         | 1.22<br>1.03<br>1.37<br>0.70<br>0.58<br>1.61<br>1.50<br>0.90                                                                 | 0.0618 F.GLARIADPEHDHT@GFLT@EY@VATRW.Y<br>0.0116 F.GLARIADPEHDHT@GFLT@EY@VATRW.Y<br>0.1112 F.GLARIADPEHDHT*GFLT@EY@VATRW.Y<br>0.0131 F.GLARIADPEHDHT@EY@VAT*RWY.R<br>none<br>none<br>0.1192 R.IADPEHDHTGFLT@EY@VATR.W<br>0.1243 R.IADPEHDHTGFLT*EY@VATR.W                                                                                                                                                                                                       |
| Mitogen-activated protein kinase 1 -- ERK2                                        | P63085 | F.GLARVADPDHDHTGFLT@EY@VATRW.Y<br>F.GLARVADPDHDHTGFLT@EY@VATRW.Y<br>F.GLARVADPDHDHTGFLT@EY@VATRW.Y<br>F.GLARVADPDHDHTGFLT*EY@VATRW.Y<br>F.GLARVADPDHDHTGFLT*EY@VATRW.Y<br>F.GLARVADPDHDHT*GFLT@EY@VATRW.Y<br>F.GLARVADPDHDHT*GFLT@EY@VATRW.Y<br>R.VADPDHDHTGFLT@EY@VATR.W<br>R.VADPDHDHTGFLT@EY@VATR.W<br><br>R.VADPDHDHTGFLT@EY@VATR.W<br>R.VADPDHDHTGFLT@EY@VATR.W<br>R.VADPDHDHTGFLT*EY@VATR.W<br>R.VADPDHDHTGFLT*EY@VATR.W<br><br>R.VADPDHDHTGFLT*EY@VATR.W | Y185<br>Y185<br>Y185<br>Y185<br>Y185<br>Y185<br>Y185<br>Y185<br>Y185<br><br>Y185<br>Y185<br>Y185<br>Y185<br>Y185 | 2889.63<br>3052.12<br>2971.42<br>2790.58<br>2953.38<br>2790.47<br>2304.29<br>2224.33<br>2224.83<br>2410.91<br>2207.28<br>2207.04<br>2207.45<br>2393.29                       | 2.30<br>1.73<br>1.03<br>1.25<br>0.99<br>1.14<br>0.28<br>0.33<br>0.83<br>0.83<br>1.28<br>1.03<br>1.45<br>1.21                 | none<br>0.0666 F.GLARVADPDHDHT@EY@VATR.W<br>0.0031 F.GLARVADPDHDHT@EY@VATRW.Y<br>0.1059 F.GLARVADPDHDHT@EY@VAT*RWY.Y<br>0.0290 F.GLARVADPDHDHT*EY@VATR.W<br>0.0231 F.GLARVADPDHDHT*GFLT@EY@VATR.W<br>none<br>0.1191 R.VADPDHDHT@EY@VATR.W<br>0.0759 R.VADPDHDHT@EY@VATR.W<br>0.1239 R.VADPDHDHT@EY@VATR.W<br>0.0626 R.VADPDHDHT*EY@VATR.W<br>0.1505 R.VADPDHDHT*EY@VATR.W<br>0.0809 R.VADPDHDHT*GFLT@EY@VATR.W<br>0.1412 R.VADPDHDHT@EY@VATR.W                  |
| Mitogen-activated protein kinase 7 -- ERK5                                        | Q9WVS8 | R.GLC*TSPEHQYFM#TEY@VATR.W<br>R.GLC*TSPEHQYFMTEY@VATR.W                                                                                                                                                                                                                                                                                                                                                                                                         | Y221<br>Y221                                                                                                     | 2457.69<br>2442.75                                                                                                                                                           | 0.65<br>1.71                                                                                                                 | 0.0721 R.GLC*TSPEHQYFM#T@EY@VATR.W<br>0.0449 R.GLC*TSPEHQYFMTEY@VATR.W                                                                                                                                                                                                                                                                                                                                                                                          |
| Mitogen-activated protein kinase 8 -- JNK1                                        | Q91Y86 | R.TAGTSFMMPY@VVTR.Y                                                                                                                                                                                                                                                                                                                                                                                                                                             | Y185                                                                                                             | 1743.49                                                                                                                                                                      | 1.69                                                                                                                         | 0.0662 R.TAGTSFMMPY@VVTR.Y                                                                                                                                                                                                                                                                                                                                                                                                                                      |
| Mitogen-activated protein kinase 9 -- JNK2                                        | Q9WTU6 | R.TAC*TNFMMPY@VVTR.Y                                                                                                                                                                                                                                                                                                                                                                                                                                            | Y185                                                                                                             | 1873.63                                                                                                                                                                      | 1.83                                                                                                                         | none                                                                                                                                                                                                                                                                                                                                                                                                                                                            |
| Mitogen-activated protein kinase 14 -- MAP kinase p38 alpha                       | P47811 | F.GLARHTDDEM#TG@VATRW.Y<br>F.GLARHTDDEMTGY@VATRW.Y<br><br>F.GLARHTDDEMTGY@VATRW.Y<br>L.ARHTDDEMTGY@VATRW.Y<br>L.DFGLARHTDDEMTGY@VATRW.Y<br>R.HTDDEM#TG@VATR.W<br>R.HTDDEMTGY@VATR.W                                                                                                                                                                                                                                                                             | Y181<br>Y181<br><br>Y181<br>Y181<br>Y181<br>Y181<br>Y181                                                         | 2175.50<br>2159.40<br>2160.64<br>2323.53<br>1990.25<br>2422.09<br>1592.19<br>1576.90<br>1575.91                                                                              | 0.53<br>0.43<br>1.67<br>1.50<br>1.38<br>1.02<br>0.54<br>1.25<br>0.26                                                         | 0.1347 F.GLARHTDDEM#T@GYVATRW.Y<br>0.0954 F.GLARHTDDEMT@GYVATRW.Y<br>0.1691 F.GLARHTDDEMT@GYVATRW.Y<br>0.0947 F.GLARHTDDEMT@GYVATRW.Y<br>0.1864 L.ARHTDDEMT@GYVATRW.Y<br>0.0849 L.DFGLARHTDDEMT@GYVATRW.Y<br>0.0807 R.HTDDEM#T@GYVATR.W<br>none<br>0.0886 R.HTDDEMT@GYVATR.W                                                                                                                                                                                    |



|                                                                                                    |        |                                                                                                                                                                                                                                                                 |                                                                              |                                                                                                            |                                                                              |                                                                                                                                                                                                                                                                                                                                                                   |
|----------------------------------------------------------------------------------------------------|--------|-----------------------------------------------------------------------------------------------------------------------------------------------------------------------------------------------------------------------------------------------------------------|------------------------------------------------------------------------------|------------------------------------------------------------------------------------------------------------|------------------------------------------------------------------------------|-------------------------------------------------------------------------------------------------------------------------------------------------------------------------------------------------------------------------------------------------------------------------------------------------------------------------------------------------------------------|
| Serine/threonine-protein kinase PAK 2                                                              | Q8CIN4 | K.LRTIVSIGDPKKKYTRY@EK.I                                                                                                                                                                                                                                        | Y252                                                                         | 2376.11                                                                                                    | 0.79                                                                         | 0.0793 K.LRTIVSIGDPKKKYTRY@RYEK.I                                                                                                                                                                                                                                                                                                                                 |
| Serine/threonine-protein kinase -- PFTAIRE-1                                                       | O35495 | K.LEKLGEGS@Y@ATVYK.G                                                                                                                                                                                                                                            | Y146                                                                         | 1718.66                                                                                                    | 0.84                                                                         | 0.0483 K.LEKLGEGS@YAT@VYK.G                                                                                                                                                                                                                                                                                                                                       |
| Serine/threonine-protein kinase -- PCTAIRE-3                                                       | Q04899 | K.LDKLGEGTY@ATVFK.G                                                                                                                                                                                                                                             | Y132                                                                         | 1623.36                                                                                                    | 1.54                                                                         | 0.1410 K.LDKLGEGTYAT@VFK.G                                                                                                                                                                                                                                                                                                                                        |
| Serine/threonine-protein kinase -- PRP4                                                            | Q61136 | C.DFGS@AS@HVADNDITPY@LVSRFY.R<br>F.GSASHVADNDITPY@LVSRFY<br>F.GSASHVADNDITPY@LVSRFY.R<br>H.VADNDITPY@LVSRFY<br>H.VADNDITPY@LVSRFY.R<br>K.LC*DFGSASHVADNDITPY@LVSR.F<br><br>K.LCDFGSAS@HVADNDITPY@LVSR.F<br>L.C*DFGSASHVADNDITPY@LVSRFY<br>S.HVADNDITPY@LVSRFY.R | Y849<br>Y849<br>Y849<br>Y849<br>Y849<br>Y849<br>Y849<br>Y849<br>Y849<br>Y849 | 2716.16<br>2129.80<br>2294.39<br>1691.52<br>1853.23<br>2518.48<br>2518.24<br>2540.29<br>2552.41<br>1991.45 | 2.00<br>0.80<br>2.32<br>1.70<br>0.34<br>1.36<br>1.12<br>0.17<br>1.30<br>1.50 | 0.0791 C.DFGS@AS@HVADNDITPY@LVSRFY.R<br>0.1221 F.GSASHVADNDIT@PVLVSRFY<br>0.0608 F.GSASHVADNDIT@PVLVSRFY.R<br>0.1790 H.VADNDIT@PVLVSRFY<br>0.0895 H.VADNDIT@PVLVSRFY.R<br>0.0690 K.LC*DFGSASHVADNDITPY@LVSR.F<br>0.0031 K.LC*DFGSASHVADNDITPY@LVSR.F<br>0.0305 K.LCDFGSAS@HVADNDITPY@LVSR.F<br>0.0112 L.C*DFGSASHVADNDIT@PVLVSRFY<br>0.1081 S.HVADNDIT@PVLVSRFY.R |
| RIKEN CDNA C230081A13: hypothetical Protein kinase A anchoring domain containing protein -- SgK269 | Q8BX56 | K.FNSYNNAGM#PPFPIIHDEPSY@AR.S<br>K.NAIKVPIVINPNAY@DNLAIK.S<br>K.NAIKVPIVINPNAY@DNLAIK.S<br><br>K.NAIKVPIVINPNAY@DNLAIK.S<br>K.VPIVINPNAY@DNLAIK.S                                                                                                               | Y613<br>Y632,Y638<br>Y632<br><br>Y638<br>Y632                                | 2847.87<br>2503.86<br>2425.00<br>2424.81<br>2424.31<br>1998.75                                             | 1.56<br>0.55<br>1.69<br>1.50<br>0.99<br>1.70                                 | 0.0304 K.FNSYNNAGM#PPFPIIHDEPS@YAR.S<br>none<br>none<br>none<br>none<br>none                                                                                                                                                                                                                                                                                      |
| <b>Protein phosphatases</b>                                                                        |        |                                                                                                                                                                                                                                                                 |                                                                              |                                                                                                            |                                                                              |                                                                                                                                                                                                                                                                                                                                                                   |
| Protein phosphatase 2 regulatory subunit B56 delta isoform                                         | Q99PC9 | R.KSELPOQDVY@T*IK.A                                                                                                                                                                                                                                             | Y572                                                                         | 1483.33                                                                                                    | 0.56                                                                         | none                                                                                                                                                                                                                                                                                                                                                              |
| Receptor-type tyrosine-protein phosphatase alpha -- R-PTP-alpha                                    | P18052 | K.VVQEYIDAFSDY@ANFK.-<br><br>Y.IDAFSDY@ANFK.-<br>Y.KVVQEYIDAFSDY@ANFK<br>Y.KVVQEYIDAFSDY@ANFK.-                                                                                                                                                                 | Y825<br><br>Y825<br>Y825<br>Y825                                             | 1990.73<br>1989.39<br>1371.08<br>1990.24<br>2117.46<br>2117.96                                             | 1.83<br>0.49<br>0.48<br>1.34<br>0.46<br>0.95                                 | 0.1360 K.VVQEYIDAFS@DYANFK.-<br>0.1321 K.VVQEYIDAFS@DYANFK.-<br>0.1983 Y.IDAFS@DYANFK.-<br>0.1699 Y.KVVQEYIDAFS@DYANFK<br>0.1423 Y.KVVQEYIDAFS@DYANFK.-<br>0.1172 Y.KVVQEYIDAFS@DYANFK.-                                                                                                                                                                          |
| Tyrosine-protein phosphatase, non-receptor type 11 -- SHP-2                                        | P35235 | H.IKIQNTGDY@YDLY.G<br>K.IQNTGDY@YDLYGGEK.F<br>R.EDSARVY@ENVGLMQQQR.S<br>R.VY@ENVGLMQQQR.S                                                                                                                                                                       | Y62<br>Y62<br>Y584<br>Y584                                                   | 1687.55<br>1816.64<br>2103.27<br>1546.68                                                                   | 1.77<br>0.86<br>0.30<br>1.95                                                 | 0.0825 H.IKIQNT@GDYDLY.G<br>0.0608 K.IQNTGDY@DLYGGEK.F<br>0.0252 R.EDS@ARVYENVGLMQQQR.S<br>none                                                                                                                                                                                                                                                                   |
| <b>SIGNALING: SMALL G PROTEINS AND REGULATORS</b>                                                  |        |                                                                                                                                                                                                                                                                 |                                                                              |                                                                                                            |                                                                              |                                                                                                                                                                                                                                                                                                                                                                   |
| Glucocorticoid receptor DNA binding factor 1 [fragment] -- p190RhoGAP                              | Q91YM2 | R.NEEENIY@SVPHDSTQGK.I<br><br>W.MPOQDGFDPDSY@AEPMDAVVKPRNEENIY.S                                                                                                                                                                                                | Y943<br><br>Y925                                                             | 2028.37<br>2027.38<br>3437.09                                                                              | 1.50<br>0.51<br>0.62                                                         | 0.1129 R.NEEENIY@VPHDSTQGK.I<br>0.0347 R.NEEENIY@VPHDSTQGK.I<br>0.0641 W.MPOQDGFDPDS@DYAEPMDAVVKPRNEENIY.S                                                                                                                                                                                                                                                        |
| Breast cancer anti-estrogen resistance protein 3 -- BCAR3                                          | Q9QZK2 | F.IFRDPY@LLDPTLEY.V<br>F.IFRDPY@LLDPTLEYVKF.S<br>Y.LLDPTLEY@VKF.S<br>R.KGENIFIRDPY@LLDPTLEY@VK.F<br>R.KGENIFIRDPY@LLDPTLEYVK.F<br>L.RLSEAY@SRVQY.Q                                                                                                              | Y103<br>Y103<br>Y111<br>Y103,Y111<br>Y103<br>Y206                            | 1836.11<br>2211.16<br>1418.86<br>2717.86<br>2638.73<br>1451.76                                             | 1.20<br>2.03<br>1.12<br>0.53<br>1.40<br>0.06                                 | none<br>0.1678 F.IFRDPY@LLDPT@LEYVKF.S<br>none<br>0.0895 R.KGENIFIRDPY@LLDPT@LEYVK.F<br>none<br>0.1168 L.RLSEAYS@RVQY.Q                                                                                                                                                                                                                                           |
| ARF GTPase-activating protein -- GIT1                                                              | Q68FF6 | R.SQSELDDQHDY@DS@VAS@DEDTDQEPLPSAG<br>ATR.N<br><br>R.SQSELDDQHDY@DS@VAS*DEDTDQEPLPSAG<br>TR.N<br>F.HSTELEDDAIY@SVHVPAGLYR<br>R.LQPFHS@TELEDDAIY@SVHVPAGLYR.I<br>R.LQPFHSTELEDDAIY@SVHVPAGLYR.I<br>R.LQPFHSTELEDDAIY@SVHVPAGLYR.I                                | Y392<br><br>Y392<br>Y554<br>Y554<br>Y554                                     | 3719.62<br><br>3621.05<br>2296.44<br>3019.56<br>2936.69<br>2921.29                                         | 1.16<br><br>0.59<br>0.39<br>2.14<br>-0.74<br>1.87                            | 0.0607 R.SQS@ELDDQHDY@DS@VAS@DEDTDQEPLPSAGATR.N<br><br>0.1120 R.SQS@ELDDQHDY@DS@VAS*DEDTDQEPLPSAGATR.N<br>0.0911 F.HSTELEDDAIY@SVHVPAGLYR<br>0.0239 R.LQPFHST@ELEDDAIY@SVHVPAGLYR.I<br>0.1052 R.LQPFHSTELEDDAIY@SVHVPAGLYR.I<br>0.0118 R.LQPFHSTELEDDAIY@SVHVPAGLYR.I                                                                                             |
| ARF GTPase-activating protein -- GIT2                                                              | Q9JLQ2 | K.QNSTPESDY@DNTAC*DPEPDDTGSTR.K<br>K.QNSTPESDY@DNTAC*DPEPDDTGSTR.K                                                                                                                                                                                              | Y541<br>Y541                                                                 | 2854.17<br>2982.55                                                                                         | 2.11<br>2.40                                                                 | 0.0570 K.QNSTPESDY@DNTAC*DPEPDDTGSTR.K<br>0.0951 K.QNSTPESDY@DNTAC*DPEPDDTGSTR.K                                                                                                                                                                                                                                                                                  |
| Ras GTPase-activating-like protein -- IQGAP1                                                       | Q9JKF1 | K.LQQTY@ALNSK.A                                                                                                                                                                                                                                                 | Y1510                                                                        | 1333.04                                                                                                    | 0.38                                                                         | 0.0103 K.LQQTY@ALNSK.A                                                                                                                                                                                                                                                                                                                                            |
| Ras and Rab interactor 1 -- Rin1                                                                   | Q921Q7 | K.EKPSTDPLY@DTPDTR.G                                                                                                                                                                                                                                            | Y35                                                                          | 1816.51                                                                                                    | 1.69                                                                         | 0.1779 K.EKPST@DPLYDTPDTR.G                                                                                                                                                                                                                                                                                                                                       |
| Rho-GTPase-activating protein 12                                                                   | Q8C0D4 | M.RATT@PPNQGRPDS@PVY@ANLQEL.K<br>M.RATT@PPNQGRPDS@PVY@ANLQEL.K<br>R.AT@TPNQGRPDS@PVY@ANLQELK.I<br>R.AT@TPNQGRPDS@PVY@ANLQELK.I<br>R.ATT@PPNQGRPDS@PVY@ANLQELK.I                                                                                                 | Y241<br>Y241<br>Y241<br>Y241<br>Y241                                         | 2665.38<br>2584.73<br>2637.23<br>2539.23<br>2637.05                                                        | 1.15<br>0.50<br>1.01<br>1.01<br>0.83                                         | 0.0400 M.RAT@TPNQGRPDS@PVY@ANLQEL.K<br>none<br>0.0093 R.ATT@PPNQGRPDS@PVY@ANLQELK.I<br>0.0100 R.ATT@PPNQGRPDS@PVY@ANLQELK.I<br>0.0040 R.ATT@TPNQGRPDS@PVY@ANLQELK.I                                                                                                                                                                                               |
| <b>SIGNALING: OTHER</b>                                                                            |        |                                                                                                                                                                                                                                                                 |                                                                              |                                                                                                            |                                                                              |                                                                                                                                                                                                                                                                                                                                                                   |
| Abl interactor 1 -- Abi-1                                                                          | Q8CBW3 | K.TLEPVKPTVPNDY@MTSPAR.L                                                                                                                                                                                                                                        | Y212                                                                         | 2295.33                                                                                                    | 2.20                                                                         | 0.0690 K.TLEPVKPTVPNDY@MTSPAR.L                                                                                                                                                                                                                                                                                                                                   |



|                                                               |        |                                                                                                                                                                                                                                                                                      |                                                                      |                                                                                                            |                                                                              |                                                                                                                                                                                                                                                                                                      |
|---------------------------------------------------------------|--------|--------------------------------------------------------------------------------------------------------------------------------------------------------------------------------------------------------------------------------------------------------------------------------------|----------------------------------------------------------------------|------------------------------------------------------------------------------------------------------------|------------------------------------------------------------------------------|------------------------------------------------------------------------------------------------------------------------------------------------------------------------------------------------------------------------------------------------------------------------------------------------------|
|                                                               |        | R.NTPY@KTLEPVKPTVPNDY@MTSPAR.L<br>R.NTPYKT@LEPVKPTVPNDY@MTSPAR.L<br>Y.KTLEPVKPTVPNDY@MTSPAR.L.G                                                                                                                                                                                      | Y212<br>Y212<br>Y212                                                 | 2293.83<br>2978.21<br>2977.76<br>2536.20                                                                   | 0.70<br>1.78<br>1.33<br>1.89                                                 | 0.1074 K.TLEPVKPTVPNDYMT@SPAR.L<br>0.0601 R.NT@PYKTLEPVKPTVPNDY@MTSPAR.L<br>0.0027 R.NTPY@KTLEPVKPTVPNDY@MTSPAR.L<br>0.0795 Y.KTLEPVKPTVPNDYMT@SPAR.L.G                                                                                                                                              |
| Annexin A2                                                    | P07356 | K.LSLEGDHSTPPSAY@GSVKPYTNFDAER.D<br>K.LSLEGDHSTPPSAY@GSVKPYTNFDAERDALNIETAVK.T<br>C.KLSLEGDHSTPPSAY@GSVKPY.T<br>L.SLEGDHSTPPSAY@GSVKPY.T<br>K.RKY@GKSLYYIQDQTK.G                                                                                                                     | Y23<br>Y23<br>Y23<br>Y310                                            | 3019.60<br>4074.03<br>2314.18<br>2072.37<br>2072.20<br>2133.59                                             | 1.21<br>1.08<br>1.07<br>0.44<br>0.27<br>-0.48                                | 0.1039 K.LSLEGDHSTPPS@AYGSVKPYTNFDAER.D<br>0.0831 K.LSLEGDHSTPPS@AYGSVKPYTNFDAERDALNIETAVK.T<br>0.0405 C.KLSLEGDHSTPPS@AYGSVKPY.T<br>0.0611 L.SLEGDHSTPPS@AYGSVKPY.T<br>none                                                                                                                         |
| Ankyrin repeat and SAM domain-containing protein 1 -- ANKS1   | P59672 | L.AVRPRIQS@SAPQEEEEHPY@ELL.L<br>L.AVRPRIQS@SAPQEEEEHPY@ELL.L<br>L.AVRPRIQSSAPQEEEEHPY@ELL.L<br>L.AVRPRIQSSAPQEEEEHPY@ELL.L<br>L.AVRPRIQSSAPQEEEEHPY@ELL.L                                                                                                                            | Y471<br>Y471<br>Y471<br>Y471<br>Y471                                 | 2625.39<br>2739.27<br>2545.60<br>2660.04<br>2771.51                                                        | 0.18<br>0.98<br>0.39<br>1.75<br>0.14                                         | 0.0703 L.AVRPRIQSS@APQEEEEHPY@ELL.L<br>0.0426 L.AVRPRIQSS@APQEEEEHPY@ELL.L<br>none<br>none<br>none                                                                                                                                                                                                   |
| Calmodulin                                                    | P62204 | R.VFDKDGNGY@ISAAELR.H<br>F.RVFDKDGNGY@ISAAELR                                                                                                                                                                                                                                        | Y99<br>Y99                                                           | 1835.70<br>1835.25                                                                                         | 0.83<br>0.38                                                                 | 0.1715 R.VFDKDGNGYIS@AAELR.H<br>0.1911 F.RVFDKDGNGYIS@AAELR                                                                                                                                                                                                                                          |
| Caveolin-1                                                    | P49817 | K.YVDSEGHLY@TVPIR.E                                                                                                                                                                                                                                                                  | Y14                                                                  | 1729.56                                                                                                    | 0.73                                                                         | 0.1046 K.YVDSEGHLYT@VPIR.E                                                                                                                                                                                                                                                                           |
| Caveolin-2                                                    | Q9WVC3 | F.MADDAYS@HHS@GVDY@ADPEKY.V<br>F.MADDAYS@HHS*GVDY@ADPEKY.V<br>F.MADDAYSHHS@GVDY@ADPEKY.V<br>F.MADDAYSHHS@GVDY@ADPEKY.V<br>F.MADDAYS*HHS@GVDY@ADPEKY.V<br>Y.SHHS@GVDY@ADPEKY.V                                                                                                        | Y27<br>Y27<br>Y27<br>Y27<br>Y27<br>Y27                               | 2511.77<br>2413.36<br>2431.75<br>2352.07<br>2413.77<br>1686.41                                             | 0.84<br>0.43<br>0.82<br>1.14<br>0.84<br>1.71                                 | 0.0208 F.MADDAY@SHHS@GVDY@ADPEKY.V<br>0.0294 F.MADDAYS*HHS@GVDY@ADPEKY.V<br>0.0532 F.MADDAYS@HHS@GVDY@ADPEKY.V<br>0.1833 F.MADDAYSHHS@GVDY@ADPEKY.V<br>0.0476 F.MADDAYS@HHS*GVDY@ADPEKY.V<br>none                                                                                                    |
| Proto-oncogene c-Crk                                          | Q64010 | L.IGGNQECSHPQPLGGPEPGPY@AQPSVN.T<br>Y.AQPSVNTPLNQLNGPIY@ARVIQ.K<br>K.RVFNAY@DKTALALEVELVK.V<br>Q.KRVFNAY@DKTALA                                                                                                                                                                      | Y221<br>Y239<br>Y251<br>Y251                                         | 2765.21<br>2571.23<br>2267.51<br>1456.62                                                                   | 0.94<br>0.88<br>1.29<br>0.85                                                 | 0.1614 L.IGGNQECSHPQPLGGPEPGPYAQPS@VN.T<br>none<br>0.1337 K.RVFNAYDKT@ALALEVELVK.V<br>none                                                                                                                                                                                                           |
| Crk-like protein                                              | P47941 | Y.VRTLY@DFPGNDAEDLPF.K<br>H.GKHGNRNS@NSY@GIPEPAHAY.A<br>H.GNRNS@NSY@GIPEPAHAY.A<br>H.GNRNSNSY@GIPEPAHAY.A<br>R.NSNSY@GIPEPAHAYAQPTTTPLPTVASTPGAALNPLPSTQNGPVFAK.A<br>R.NSNSYGIPEPAHAY@AQPTTTPLPTVASTPGAALNPLPSTQNGPVFAK.A                                                            | Y132<br>Y198<br>Y198<br>Y198<br>Y198<br>Y207                         | 2049.94<br>2329.96<br>2007.22<br>1926.66<br>4954.83<br>4953.06                                             | 1.01<br>0.94<br>0.37<br>-0.19<br>1.39<br>-0.38                               | 0.0171 Y.VRT@LYDFPGNDAEDLPF.K<br>0.0533 H.GKHGNRNS@NS@YGIPEPAHAY.A<br>0.0145 H.GNRNS@NS@YGIPEPAHAY.A<br>0.0455 H.GNRNSNS@YGIPEPAHAY.A<br>0.0067 R.NSNS@YGIPEPAHAYAQPTTTPLPTVASTPGAALNPLPSTQNGPVFAK.A<br>0.0482 R.NSNSYGIPEPAHAYAQPT@TTPLPTVASTPGAALNPLPSTQNGPVFAK.A                                  |
| Docking protein 1 (Dok1)                                      | P97465 | R.IPPGPSQDSVY@SDPLGSTPAGAGEGVHSK.K<br>K.KPLYWDLY@GHVQQQLL.K<br>K.LTDSKEDIY@DEPEGLAPAPPR.G<br>K.TKLTDSKEDIY@DEPEGLAPAPPR.G<br>L.KTKLTDSKEDIY@DEPEGLAPAPPRGLY.D<br>L.LKTKLTDSKEDIY@DEPEGLAPAPPRGLY.D<br>R.LKEEGYELPYNPATDDY@AVPPR.S<br>F.SSDTALY@SQVQKSGTSGAW.D<br>K.GFSSDTALY@SQVQK.S | Y314<br>Y340<br>Y361<br>Y361<br>Y361<br>Y361<br>Y408<br>Y450<br>Y450 | 2888.77<br>2210.90<br>2490.85<br>2491.80<br>2720.84<br>3181.70<br>3295.51<br>2715.69<br>2054.41<br>1611.29 | 1.42<br>1.75<br>0.67<br>1.62<br>1.52<br>1.12<br>1.84<br>1.42<br>1.49<br>0.55 | 0.0507 R.IPPGPSQDS@VYSDPLGSTPAGAGEGVHSK.K<br>none<br>0.0169 K.LTDS@KEDIYDEPEGLAPAPPR.G<br>none<br>none<br>0.1003 L.KTKLTDS@KEDIYDEPEGLAPAPPRGLY.D<br>0.0090 L.LKTKLTDS@KEDIYDEPEGLAPAPPRGLY.D<br>0.1685 R.LKEEGYELPYNPAT@DDYAVPPR.S<br>0.0872 F.SSDTALYS@QVQKSGTSGAW.D<br>0.1228 K.GFSSDTALYS@QVQK.S |
| Ephrin-B2 precursor (Ephrin-B1)                               | P52800 | R.TADSVFC*PHY@EK.V<br>K.VSGDY@GHPVYIVQEMPPQSPANIYK.V.-<br>K.VSGDYGHPVY@IVQEMPPQSPANIY@YK.V.-<br>K.VSGDYGHPVYIVQEM#PPQSPANIY@YK.V.-<br>K.VSGDYGHPVYIVQEMPPQSPANIY@YK.V.-                                                                                                              | Y307<br>Y314<br>Y319,Y333<br>Y333<br>Y333                            | 1533.58<br>3133.25<br>3213.54<br>3148.50<br>3132.93                                                        | -0.04<br>1.76<br>2.05<br>1.01<br>1.44                                        | none<br>0.0505 K.VSGDYGHPVY@IVQEMPPQSPANIYK.V.-<br>0.0037 K.VSGDY@GHPVYIVQEMPPQSPANIY@YK.V.-<br>0.0827 K.VSGDYGHPVYIVQEM#PPQSPANIY@YK.V.-<br>none                                                                                                                                                    |
| Fibroblast growth factor receptor substrate 2 -- FRS2         | Q8C180 | K.LVY@ENINGLSIPSASGVR.R<br>R.RPALLNY@ENLPSLPPVWEAR.K                                                                                                                                                                                                                                 | Y306<br>Y349                                                         | 1969.34<br>2416.51                                                                                         | 0.33<br>1.25                                                                 | none<br>none                                                                                                                                                                                                                                                                                         |
| Fish protein -- TKS5                                          | O89032 | K.VKYEEPEY@DVPAFGDFSEPEMNEEPSGDR.G                                                                                                                                                                                                                                                   | Y557                                                                 | 3443.91                                                                                                    | 1.48                                                                         | 0.0364 K.VKY@EEPEYDVPAFGDFSEPEMNEEPSGDR.G                                                                                                                                                                                                                                                            |
| GRB2-associated binding protein 1 -- Gab1                     | Q9QYY0 | K.HGMNGFFQQMMY@DC*PPSR.L<br>K.DASSQDC*Y@DIPR.T<br>L.RKDASSQDC*Y@DIPR.T.F<br>N.KLRKDASSQDC*Y@DIPR.T.F<br>R.KDASSQDC*Y@DIPR.T                                                                                                                                                          | Y242<br>Y407<br>Y407<br>Y407<br>Y407                                 | 2412.02<br>1506.85<br>2039.52<br>2280.55<br>1635.93<br>1635.28                                             | 1.09<br>0.28<br>0.64<br>0.49<br>1.27<br>0.62                                 | none<br>none<br>none<br>0.1319 N.KLRKDASSQDC*YDIPR.T@F.P<br>none<br>none                                                                                                                                                                                                                             |
| Insulin receptor substrate 2 -- IRS-2                         | P81122 | K.SSSSNLGAADDGY@MPM#TPGAALR.S<br>K.SSSSNLGAADDGY@MPMTPGAALR.S<br>K.SDDY@MPMSPTSVSAPK.Q                                                                                                                                                                                               | Y649<br>Y649<br>Y671                                                 | 2293.62<br>2279.62<br>1793.58                                                                              | -0.38<br>1.63<br>0.83                                                        | none<br>none<br>0.0249 K.S@DDYMPMSPTSVSAPK.Q                                                                                                                                                                                                                                                         |
| Insulin receptor substrate-2 (IRS-2) (4PS) homolog [Fragment] | Q3U2I0 | R.SYKAPC*SC*SGDDDDQY@VLMSSPVGR.I                                                                                                                                                                                                                                                     | Y754                                                                 | 2759.44                                                                                                    | 0.33                                                                         | none                                                                                                                                                                                                                                                                                                 |
| Kin of IRRE-like protein 1 precursor                          | Q80W68 | K.AIY@SSFKDDVDLK.Q<br>K.AIY@SSFKDDVDLKQDLR.C                                                                                                                                                                                                                                         | Y604<br>Y604                                                         | 1581.16<br>2093.01                                                                                         | 0.40<br>-0.02                                                                | 0.1327 K.AIYS@SFKDDVDLK.Q<br>0.1376 K.AIYS@SFKDDVDLKQDLR.C                                                                                                                                                                                                                                           |

|                                                                             |          |                                                                                                                                                                                                                                                                                                                                                                                                                                                                                                                                                    |                                                                                                                                      |                                                                                                                                                                                                                          |                                                                                                                                                              |                                                                                                                                                                                                                                                                                                                                                                                                                                                                        |
|-----------------------------------------------------------------------------|----------|----------------------------------------------------------------------------------------------------------------------------------------------------------------------------------------------------------------------------------------------------------------------------------------------------------------------------------------------------------------------------------------------------------------------------------------------------------------------------------------------------------------------------------------------------|--------------------------------------------------------------------------------------------------------------------------------------|--------------------------------------------------------------------------------------------------------------------------------------------------------------------------------------------------------------------------|--------------------------------------------------------------------------------------------------------------------------------------------------------------|------------------------------------------------------------------------------------------------------------------------------------------------------------------------------------------------------------------------------------------------------------------------------------------------------------------------------------------------------------------------------------------------------------------------------------------------------------------------|
|                                                                             |          | R.EEYEMKDPTNGY@YVNR.A<br>R.AVLY@ADY@RAPGPTR.F<br>Y.NVRAHEDRPSSRAVLY@ADY.R<br>R.TPY@EAYDPIGK.Y<br>Y.RLGYPOAPPSGLERTPY@EAYDPIGKY.A<br>R.TPYEAY@DPIGK.Y                                                                                                                                                                                                                                                                                                                                                                                               | Y637<br>Y654, Y657<br>Y654<br>Y753<br>Y753<br>Y756                                                                                   | 2088.84<br>1710.06<br>2299.69<br>1334.35<br>3020.61<br>1333.93                                                                                                                                                           | 0.95<br>0.25<br>0.59<br>0.75<br>2.14<br>0.33                                                                                                                 | 0.0102 R.EEYEMKDPTNGY@NVR.A<br>none<br>0.1088 Y.NVRAHEDRPSS@RAVLYADY.R<br>0.1201 R.T@PYEAYDPIGK.Y<br>0.1308 Y.RLGYPOAPPSGLERTPYEAY@DPIGKY.A<br>none                                                                                                                                                                                                                                                                                                                    |
| myelin protein zero-like 1 -- PZR                                           | Q3TEW6   | K.SPSSAGSHQGPVIV@AQLDHSGGHSHGK.I<br>K.INKSESVVY@ADIR.K<br><br>K.INKSESVVY@ADIRK.D-<br>K.SESVVY@ADIR.K<br>N.KSESVVY@ADIRK.D-<br>H.SGKINKSESVVY@ADIRK.D-                                                                                                                                                                                                                                                                                                                                                                                             | Y242<br>Y264<br><br>Y264<br>Y264<br>Y264<br>Y264                                                                                     | 2788.83<br>1574.44<br>1574.04<br>1817.67<br>1219.29<br>1590.69<br>2090.06                                                                                                                                                | 0.54<br>0.64<br>0.24<br>0.75<br>0.72<br>0.90<br>0.99                                                                                                         | none<br>none<br>none<br>none<br>0.1964 K.SES@VVYADIR.K<br>none<br>none                                                                                                                                                                                                                                                                                                                                                                                                 |
| Non-catalytic region of tyrosine kinase adaptor protein 1 -- NCK1           | Q99M51   | K.RKPS@VPDTASPADDSFVDPGERLY@DLNM#PAFVK.F<br><br>K.RKPS@VPDTASPADDSFVDPGERLY@DLNMPAFVK.F<br><br>K.RKPSVPDTASPADDSFVDPGERLY@DLNMPAFVK.F                                                                                                                                                                                                                                                                                                                                                                                                              | Y105<br><br>Y105<br><br>Y105                                                                                                         | 3812.62<br><br>3796.70<br><br>3716.28                                                                                                                                                                                    | 1.84<br><br>1.92<br><br>1.50                                                                                                                                 | 0.1535 K.RKPSVPDT@ASPADDSFVDPGERLY@DLNM#PAFVK.F<br><br>0.0441 K.RKPSVPDT@ASPADDSFVDPGERLY@DLNMPAFVK.F<br><br>0.1820 K.RKPSVPDTASPADDS@FVDPGERLY@DLNMPAFVK.F                                                                                                                                                                                                                                                                                                            |
| PDZ and LIM domain protein 5                                                | Q8CI51   | R.NTEFY@HIPHSDASK.K                                                                                                                                                                                                                                                                                                                                                                                                                                                                                                                                | Y251                                                                                                                                 | 1829.28                                                                                                                                                                                                                  | 2.47                                                                                                                                                         | none                                                                                                                                                                                                                                                                                                                                                                                                                                                                   |
| Phosphatidylinositol 3-kinase regulatory alpha subunit -- p85alpha          | P26450   | K.SREYDRLY@EEYTR.T<br>R.DQY@LMWLTQK.G<br>K.LNEWLGNENTEDQY@SLVEDDEDLPHHDEK.T                                                                                                                                                                                                                                                                                                                                                                                                                                                                        | Y467<br>Y580<br>Y607                                                                                                                 | 1860.48<br>1407.45<br>3565.69                                                                                                                                                                                            | 0.65<br>1.79<br>2.17                                                                                                                                         | none<br>none<br>0.0197 K.LNEWLGNENTEDQYS@LVEDDEDLPHHDEK.T                                                                                                                                                                                                                                                                                                                                                                                                              |
| Phosphatidylinositol 3-kinase, regulatory subunit, polypeptide 2 -- p85beta | O08908   | R.EYDQLY@EEYTR.T                                                                                                                                                                                                                                                                                                                                                                                                                                                                                                                                   | Y458                                                                                                                                 | 1589.19                                                                                                                                                                                                                  | 0.54                                                                                                                                                         | 0.1826 R.EYDQLYEEY@TR.T                                                                                                                                                                                                                                                                                                                                                                                                                                                |
| Protein LAP2                                                                | Q80TH2   | R.RTEGDY@LSYR.E<br>R.TEGDY@LSYR.E                                                                                                                                                                                                                                                                                                                                                                                                                                                                                                                  | Y1097<br>Y1097                                                                                                                       | 1340.40<br>1183.37                                                                                                                                                                                                       | 0.80<br>-0.13                                                                                                                                                | 0.0788 R.RTEGDYLS@YR.E<br>0.1618 R.TEGDYLS@YR.E                                                                                                                                                                                                                                                                                                                                                                                                                        |
| SH2 domain-containing adapter protein B -- Shb                              | Q6PD21   | C.RLDY@C*GGGGGGDPGGGQRAF.T<br>L.RAMC*RLDY@C*GGGGGGDPGGGQRAF.T<br>M.C*RLDY@C*GGGGGGDPGGGQRAF.T<br>R.LDY@C*GGGGGGDPGGGQRAF.T<br>K.C*SAEETGAGQKDKVTIADDY@SDPFDAK.S<br>K.DKVTIADDY@SDPFDAK.S<br><br>K.VTIADDY@SDPFDAK.S<br>L.LNKC*SAEETGAGQKDKVTIADDY@SDPF.D<br>F.DAKSDLKSKAGKGESAGY@MEPYE<br>F.DAKSDLKSKAGKGESAGY@MEPYE<br>K.AGKGESAGY@MEPYEAQR.I<br>K.AGKGESAGY@MEPYEAQR.I<br><br>K.GESAGY@MEPYEAQR.I<br>K.SKAGKGESAGY@MEPYEAQR.I<br>L.KSKAGKGESAGY@MEPYE<br>K.LPQDDDRPADEY@DQPWEWNR.V<br>L.RLRESKLPQDDDRPADEY@DQPWE<br>R.ESKLPQDDDRPADEY@DQPWEWNR.V | Y113<br>Y113<br>Y113<br>Y113<br>Y240<br>Y240<br><br>Y240<br>Y262<br>Y262<br>Y262<br><br>Y262<br>Y262<br>Y262<br>Y330<br>Y330<br>Y330 | 2034.85<br>2553.43<br>2194.54<br>1660.02<br>2999.08<br>1880.27<br>1881.05<br>1637.43<br>3039.87<br>2429.15<br>2412.85<br>1940.45<br>1925.54<br>1924.60<br>1667.98<br>2139.90<br>1782.91<br>2626.86<br>2810.06<br>2969.85 | 1.01<br>1.40<br>0.69<br>0.39<br>0.80<br>0.44<br>1.22<br>0.72<br>0.53<br>1.04<br>0.74<br>0.62<br>1.71<br>0.77<br>0.31<br>0.95<br>0.10<br>1.76<br>0.77<br>0.58 | none<br>none<br>none<br>none<br>0.0223 K.C*SAEETGAGQKDKVTIADDYS@DPFPAK.S<br>0.1276 K.DKVTIADDYS@DPFPAK.S<br>0.0685 K.DKVTIADDYS@DPFPAK.S<br>0.0466 K.VTIADDYS@DPFPAK.S<br>0.0139 L.LNKC*SAEETGAGQKDKVTIADDYS@DPF.D<br>0.0830 F.DAKSDLKSKAGKGES@AGYM#EPY.E<br>0.0262 F.DAKSDLKSKAGKGES@AGYMEPYE<br>0.0601 K.AGKGES@AGYM#EPYEAQR.I<br>0.0898 K.AGKGES@AGYMEPYEAQR.I<br>none<br>0.1536 K.GES@AGYMEPYEAQR.I<br>none<br>0.0766 L.KSKAGKGES@AGYMEPYE<br>none<br>none<br>none |
| SHC transforming protein 1 -- SHC1                                          | P98083   | K.QM#LPPPPC*PGRELFDDPSY@VNIQNLDK.A<br>R.ELFDDPSY@VNIQNLDK.A<br>K.QMLPPPRCPGRELFDDPSY@VNIQNLDK.A<br>R.KQMLPPPRCPGRELFDDPSY@VNIQNLDK.A<br>R.MAGFDGSAWDEEEEEPPDHQY@Y@NDFPGKEPPLGGVDMR.L<br>R.MAGFDGSAWDEEEEEPPDHQY@Y@NDFPGKEPPLGGVDMR.L                                                                                                                                                                                                                                                                                                               | Y423<br>Y423<br>Y423<br>Y423<br>Y349, Y350<br>Y350                                                                                   | 3237.45<br>1990.62<br>3222.94<br>3351.93<br>4572.10<br>4493.24                                                                                                                                                           | 0.95<br>0.70<br>0.40<br>1.29<br>1.21<br>2.35                                                                                                                 | 0.0085 K.QM#LPPPPC*PGRELFDDPSY@VNIQNLDK.A<br>0.0530 R.ELFDDPSY@VNIQNLDK.A<br>0.0076 K.QMLPPPRCPGRELFDDPSY@VNIQNLDK.A<br>0.0313 R.KQMLPPPRCPGRELFDDPSY@VNIQNLDK.A<br>none<br>0.0258<br>R.MAGFDGSAWDEEEEEPPDHQY@Y@NDFPGKEPPLGGVDMR.L                                                                                                                                                                                                                                     |
| SH2-containing inositol 5-phosphatase 2 -- SHIP2                            | Q9JLL7   | K.NSFNNPAY@VLEGVPHQLLPLEPPSLAR.A                                                                                                                                                                                                                                                                                                                                                                                                                                                                                                                   | Y987                                                                                                                                 | 3217.81                                                                                                                                                                                                                  | 2.18                                                                                                                                                         | 0.0380 K.NSFNNPAY@VLEGVPHQLLPLEPPSLAR.A                                                                                                                                                                                                                                                                                                                                                                                                                                |
| Tyrosine-protein phosphatase non-receptor type substrate 1 - SHPS1          | P97797   | Y.ASIETGKVPREPDLTY@ADLDMVHL.S                                                                                                                                                                                                                                                                                                                                                                                                                                                                                                                      | Y481                                                                                                                                 | 2852.91                                                                                                                                                                                                                  | 1.52                                                                                                                                                         | 0.0159 Y.ASIETGKVPREPDLTY@ADLDMVHL.S                                                                                                                                                                                                                                                                                                                                                                                                                                   |
| Signal transducer and activator of transcription 3 -- STAT3                 | P42227   | K.YC*RPESQEHPEADPGSAAPY@LK.T                                                                                                                                                                                                                                                                                                                                                                                                                                                                                                                       | Y705                                                                                                                                 | 2584.06                                                                                                                                                                                                                  | 1.95                                                                                                                                                         | 0.0759 K.YC*RPESQEHPEADPGS@AAPYLK.T                                                                                                                                                                                                                                                                                                                                                                                                                                    |
| STAT3 splice isoform Del-701                                                | P42227-3 | K.YC*RPESQEHPEADPGSAAPY@LK.T                                                                                                                                                                                                                                                                                                                                                                                                                                                                                                                       | Y704                                                                                                                                 | 2496.75                                                                                                                                                                                                                  | 1.67                                                                                                                                                         | none                                                                                                                                                                                                                                                                                                                                                                                                                                                                   |
| Signal transducer and activator of transcription 5B -- STAT5B               | P42232   | K.AADGY@VKPQIK.Q                                                                                                                                                                                                                                                                                                                                                                                                                                                                                                                                   | Y699                                                                                                                                 | 1271.08                                                                                                                                                                                                                  | 1.43                                                                                                                                                         | none                                                                                                                                                                                                                                                                                                                                                                                                                                                                   |
| <b>ADHESION: CELL/ECM</b>                                                   |          |                                                                                                                                                                                                                                                                                                                                                                                                                                                                                                                                                    |                                                                                                                                      |                                                                                                                                                                                                                          |                                                                                                                                                              |                                                                                                                                                                                                                                                                                                                                                                                                                                                                        |
| CRK-associated substrate -- p130cas                                         | Q61140   | K.TQQGLY@QAPGNPQFQSPPAK.Q<br>R.VGGQYVYEAQTEQDEY@DTPR.H<br><br>Y.VYEAQTEQDEY@DTPRHLL<br><br>R.HLLAPGPQDIY@DVPPVR.G                                                                                                                                                                                                                                                                                                                                                                                                                                  | Y132<br>Y238<br><br>Y238<br><br>Y253                                                                                                 | 2334.53<br>2500.90<br>2500.30<br>2245.97<br>2246.15<br>1968.31                                                                                                                                                           | 0.40<br>1.83<br>1.23<br>0.99<br>1.17<br>1.30                                                                                                                 | 0.1231 K.T@QQGLYQAPGNPQFQSPPAK.Q<br>0.0268 R.VGGQYVYEAQTEQDEY@DTPR.H<br>0.1051 R.VGGQYVYEAQTEQDEY@DTPR.H<br>0.1402 Y.VYEAQTEQDEY@DTPRHLL<br>none<br>none                                                                                                                                                                                                                                                                                                               |

|                                                         |        |                                                                                                                                                                                                               |                                                                |                                                                                                                       |                                                                                       |                                                                                                                                                                                                                                                                                                                            |
|---------------------------------------------------------|--------|---------------------------------------------------------------------------------------------------------------------------------------------------------------------------------------------------------------|----------------------------------------------------------------|-----------------------------------------------------------------------------------------------------------------------|---------------------------------------------------------------------------------------|----------------------------------------------------------------------------------------------------------------------------------------------------------------------------------------------------------------------------------------------------------------------------------------------------------------------------|
|                                                         |        | L.LAPGQDIY@DVPPVRGLLPNQY.G<br>R.GLLPNQYQEVY@DTPPMVAVK.G                                                                                                                                                       | Y253<br>Y271                                                   | 1967.35<br>2502.60<br>2301.33<br>2301.61<br>2248.94<br>2076.35<br>2636.66<br>1407.80<br>2914.03<br>2629.75<br>1818.84 | 0.34<br>0.32<br>1.23<br>1.51<br>1.84<br>0.34<br>2.34<br>0.09<br>0.59<br>1.46<br>-0.04 | none<br>none<br>none<br>none<br>none<br>none<br>0.0884 K.DVPDGPLLREET@YDVPPAFAPK.P<br>0.0443 R.RPGPGT@LYDVPR.E<br>none<br>none<br>0.1534 L.SRQLQKMEDVYQT@L.V                                                                                                                                                               |
| Enhancer of filamentation 1 -- HEF1                     | O35177 | R.TGHGYVY@EYPSR.Y<br>K.ANPEERDGVY@DVPLHNPADAK.G                                                                                                                                                               | Y165<br>Y344                                                   | 1510.24<br>2387.12                                                                                                    | 1.59<br>0.02                                                                          | none<br>none                                                                                                                                                                                                                                                                                                               |
| Integrin beta-1 precursor                               | P09055 | K.WDTGENPIY@K.S                                                                                                                                                                                               | Y783                                                           | 1303.91                                                                                                               | 1.34                                                                                  | none                                                                                                                                                                                                                                                                                                                       |
| Lipoma-preferred partner homolog - LPP                  | Q8BFW7 | H.YMAGPSSGQIY@GPGPRGY.N<br>M.AGPSSGQIY@GPGPRGY.N<br>Y.MAGPSSGQIY@GPGPRGY.N<br><br>R.GYNNQPVVSGQC*PPPPT*VGTDY@AYIPPSG<br>HPPESGYGTSNQGR.Y<br>R.YYEPY@YAAGPSYGGR.S<br>R.YYEPY@YAAGPSYGGR.S                      | Y245<br>Y245<br>Y245<br>Y276<br>Y301<br>Y302                   | 1938.33<br>1938.43<br>1644.21<br>1775.96<br>1776.09<br>5002.32<br>1794.43<br>1794.15                                  | 0.47<br>0.57<br>0.45<br>1.16<br>1.29<br>2.16<br>0.68<br>0.40                          | none<br>none<br>none<br>none<br>none<br>0.0858<br>R.GYNNQPVVSGQC*PPPPT*C*VGTDYAYIPPSGHPPESGYGT<br>SNQGR.Y<br>0.0190 R.YYEPY@YAAGPSYGGR.S<br>0.0399 R.YYEPY@YAAGPSYGGR.S                                                                                                                                                    |
| Paxillin                                                | Q8VI36 | F.LSEEPY@SYPTGNHTY.Q<br>L.SEEPY@SYPTGNHTY.Q<br>S.KRPVFLSEEPY@SYPTGNHTY.Q<br>R.YAHQQPPS@PLPVY@SSSAK.N<br>R.YAHQQPPS@PLPVY@SSSAK.N<br>R.YAHQQPPS@PLPVY@SSSAK.N<br>R.AGEEHVY@SFPNK.Q<br><br>R.AGEEHVY@SFPNKQK.S  | Y31<br>Y31<br>Y31<br>Y88<br>Y88<br>Y88<br>Y118<br>Y118         | 1935.30<br>1822.11<br>2562.44<br>2117.57<br>2038.11<br>2020.40<br>1587.51<br>1587.54<br>1843.79<br>1843.66            | 0.48<br>0.38<br>0.24<br>0.59<br>1.13<br>1.42<br>0.82<br>0.85<br>0.95<br>0.82          | 0.1599 F.LSEEPY@SYPTGNHTY.Q<br>0.1081 L.SEEPY@SYPTGNHTY.Q<br>0.0155 S.KRPVFLSEEPY@SYPTGNHTY.Q<br>0.0680 R.YAHQQPPS@PLPVY@SSSAK.N<br>0.0227 R.YAHQQPPS@PLPVY@SSSAK.N<br>0.0065 R.YAHQQPPS@PLPVY@SSSAK.N<br>0.1862 R.AGEEHVY@SFPNK.Q<br>0.1021 R.AGEEHVY@SFPNK.Q<br>0.0905 R.AGEEHVY@SFPNKQK.S<br>0.0656 R.AGEEHVY@SFPNKQK.S |
| Pleckstrin homology domain containing family C member 1 | Q8CIB5 | L.IMP GSGSIY@SSPGLY.S                                                                                                                                                                                         | Y179                                                           | 1610.20                                                                                                               | 1.45                                                                                  | 0.0345 L.IMP GSGSIY@SSPGLY.S                                                                                                                                                                                                                                                                                               |
| Syndecan-4 precursor                                    | O35988 | K.KAPTNEFY@A.-<br>Y.KAPTNEFY@A.-                                                                                                                                                                              | Y197<br>Y197                                                   | 1120.70<br>1249.15                                                                                                    | 0.19<br>0.55                                                                          | none<br>none                                                                                                                                                                                                                                                                                                               |
| Talin 1                                                 | P26039 | K.TM#QFEPSTMVY@DAC*R.M<br>K.TM#QFEPSTMVY@DAC*R.M<br>M.QFEPSTMVY@DAC*RM.I<br>F.LSDDDPKGIWLEAGKALDY@Y.M<br>K.ALDY@YM#LR.N<br>K.ALDY@YMLR.N<br>W.LEAGKALDY@Y.M<br>R.IGITNHDEY@SLVR.E<br><br>K.LLGEIAQGNY@AGIAR.D | Y26<br>Y26<br>Y26<br>Y70<br>Y70<br>Y70<br>Y70<br>Y127<br>Y1116 | 1931.70<br>1917.52<br>1815.37<br>2477.47<br>1142.35<br>1126.77<br>1222.98<br>1597.61<br>1597.19<br>1940.75            | -0.05<br>1.77<br>0.66<br>0.27<br>1.83<br>2.25<br>0.41<br>0.83<br>0.41<br>0.79         | none<br>none<br>none<br>0.0283 F.LSDDDPKGIWLEAGKALDY@Y.M<br>0.1561 K.ALDY@YM#LR.N<br>0.1423 K.ALDY@YMLR.N<br>0.1351 W.LEAGKALDY@Y.M<br>0.1460 R.IGITNHDEYS@LVR.E<br>0.1268 R.IGITNHDEYS@LVR.E<br>none                                                                                                                      |
| Tensin                                                  | Q9DBT6 | R.HAAY@GGY@STPEDR.R<br>R.HAAY@GGYSTPEDR.R<br>R.HAAYGGY@STPEDR.R<br>R.HAAYGGY@STPEDRRPT*LSR.Q                                                                                                                  | Y213,Y216<br>Y213<br>Y216<br>Y216                              | 1584.27<br>1504.50<br>1503.84<br>2197.12                                                                              | 0.65<br>0.88<br>0.22<br>1.08                                                          | 0.0415 R.HAAY@GGYS@TPEDR.R<br>none<br>0.0381 R.HAAYGGYS@TPEDR.R<br>0.0284 R.HAAYGGYST@PEDRRPT*LSR.Q                                                                                                                                                                                                                        |
| Tensin 2                                                | Q8CJ95 | H.TRGPLDGSPIY@AQVQ.R<br>L.AHTRGPLDGSPIY@AQVQ.R<br>R.GPLDGSPIY@AQVQ.R.V<br>K.VGEEGHEGC*SY@AVC*SEGR.Y                                                                                                           | Y460<br>Y460<br>Y460<br>Y747                                   | 1568.33<br>1777.10<br>1468.33<br>2064.20                                                                              | -0.41<br>0.26<br>0.63<br>1.45                                                         | 0.0563 H.TRGPLDGS@PYAQVQ.R<br>0.1306 L.AHTRGPLDGS@PYAQVQ.R<br>none<br>0.0532 K.VGEEGHEGC*SY@AVC*SEGR.Y                                                                                                                                                                                                                     |
| Tensin 3                                                | Q5SSZ5 | L.HTQGPVVDGSLY@AKVR.K<br>R.KPSAPTPVQAYGQSNY@STQTWVR.Q                                                                                                                                                         | Y354<br>Y584                                                   | 1709.58<br>2647.84                                                                                                    | 1.72<br>1.57                                                                          | none<br>0.0899 R.KPSAPTPVQAYGQSNY@STQTWVR.Q                                                                                                                                                                                                                                                                                |
| Vinculin                                                | Q64727 | R.ILLRNPNGQAAY@EHFETMK.N<br>K.SFLDSGY@R.I                                                                                                                                                                     | Y691<br>Y821                                                   | 2312.45<br>1025.39                                                                                                    | 0.33<br>0.93                                                                          | none<br>0.1505 K.SFLDS@GYR.I                                                                                                                                                                                                                                                                                               |
| <b>ADHESION: CELL/CELL</b>                              |        |                                                                                                                                                                                                               |                                                                |                                                                                                                       |                                                                                       |                                                                                                                                                                                                                                                                                                                            |
| Catenin delta-1 -- p120 catenin                         | P30999 | K.LNGPQDHNHLLY@STIPR.M<br>R.HYEDGYPGGSDNY@GSLSR.V<br>R.HYEDGYPGGSDNY@GS*LSR.V<br>R.FHPEPYGLEDDQRSMGY@DDLTY@GMMSDYGT<br>AR.R<br>K.SDNNY@STLNER.G                                                               | Y96<br>Y228<br>Y228<br>Y291,Y296<br>Y877                       | 2054.94<br>2057.00<br>2054.01<br>2054.34<br>2036.37<br>3893.08<br>1392.42                                             | -0.07<br>1.98<br>0.18<br>0.51<br>0.54<br>1.54<br>-0.16                                | 0.0532 K.LNGPQDHNHLLYS@TIPR.M<br>0.0202 K.LNGPQDHNHLLYS@TIPR.M<br>0.0958 R.HYEDGYPGGSDNYGS@LSR.V<br>0.0534 R.HYEDGYPGGSDNYGS@LSR.V<br>0.1906 R.HYEDGYPGGSDNYGS@LSR.V<br>0.0094 R.FHPEPYGLEDDQRS@MGYDDLTY@GMMSDYGTAR.R<br>0.1096 K.SDNNYS@TLNER.G                                                                           |
| Ctnnd1 protein -- p120 catenin, isoform                 | Q80XQ4 | K.SLDNNY@STLNER.G                                                                                                                                                                                             | Y904                                                           | 1505.93                                                                                                               | 0.27                                                                                  | 0.1639 K.SLDNNYS@TLNER.G                                                                                                                                                                                                                                                                                                   |

|                                                                        |        |                                                                                                                                                                                                               |                                                             |                                                                                      |                                                              |                                                                                                                                                                                                                                                            |
|------------------------------------------------------------------------|--------|---------------------------------------------------------------------------------------------------------------------------------------------------------------------------------------------------------------|-------------------------------------------------------------|--------------------------------------------------------------------------------------|--------------------------------------------------------------|------------------------------------------------------------------------------------------------------------------------------------------------------------------------------------------------------------------------------------------------------------|
| Discs large homolog 3                                                  | P70175 | R.RDNEVDGQDY@HFVWSR.E                                                                                                                                                                                         | Y705                                                        | 2017.09                                                                              | 1.20                                                         | none                                                                                                                                                                                                                                                       |
| Fath protein [fragment]                                                | Q497H5 | K.NIY@SDIPPQVPRVIRISYTPSIPSDSR.N                                                                                                                                                                              | Y952                                                        | 2979.37                                                                              | 0.87                                                         | 0.0523 K.NIYS@DIPPQVPRVIRISYTPSIPSDSR.N                                                                                                                                                                                                                    |
| Partitioning-defective 3 homolog -- PARD3                              | Q99NH2 | R.ISHSLY@SGIEGLDESPTR.N<br>R.RIS@HSLY@SGIEGLDESPTR.N<br>R.RISHS@LY@SGIEGLDESPTR.N<br>R.RISHSLY@SGIEGLDESPTR.N<br>R.ERDY@AEIQDFHR.T<br>R.EGHLMDTLY@AQVK.K<br>R.KNASSISQDSWEQNY@APGEGFQSAK.E                    | Y719<br>Y719<br>Y719<br>Y719<br>Y1076<br>Y1123<br>Y1238     | 2041.58<br>2041.22<br>2278.02<br>2278.89<br>2197.76<br>1660.64<br>1585.31<br>2810.61 | 0.62<br>0.26<br>0.96<br>1.83<br>0.70<br>1.91<br>0.56<br>1.37 | 0.0075 R.ISHSLY@SGIEGLDESPTR.N<br>0.0823 R.ISHSLY@SGIEGLDESPTR.N<br>0.0016 R.RIS@HSLY@SGIEGLDESPTR.N<br>0.0184 R.RIS@HSLY@SGIEGLDESPTR.N<br>0.0938 R.RISHS@LYSGIEGLDESPTR.N<br>none<br>none<br>none                                                        |
| Plakophilin-4; Armadillo related protein                               | Q68FH0 | R.TVHMDQFGQQYDIY@ER.M<br>L.RSAVSPDLHITPIY@EGRTY.Y<br>R.NNY@ALNTAATY@AEPYRPVQYR.V<br>R.NNYALNTAATY@AEPYRPVQYR.V<br>Y.ALNTAATY@AEPYR<br>R.SY@EDPYC*DDRHFVHPAST@DYSTQYGLK.S<br>R.SY@EDPYC*DDRHFVHPASTDYSTQYGLK.S | Y371<br>Y414<br>Y469,Y477<br>Y477<br>Y477<br>Y1137<br>Y1137 | 2354.86<br>2256.00<br>2636.51<br>2556.47<br>1365.33<br>3276.05<br>3195.28            | 1.87<br>0.88<br>1.30<br>1.26<br>0.72<br>1.73<br>0.96         | 0.0523 R.TVHMDQFGQQY@DIYER.M<br>0.1258 L.RSAVSPDLHITPIYEGRT@YY<br>0.0795 R.NNY@ALNTAAT@AEPYRPVQYR.V<br>0.0820 R.NNYALNTAAT@AEPYRPVQYR.V<br>0.0377 Y.ALNTAAT@AEPYR<br>0.0055 R.S@YEDPYC*DDRHFVHPAST@DYSTQYGLK.S<br>0.0004 R.S@YEDPYC*DDRHFVHPASTDYSTQYGLK.S |
| Scavenger receptor class F member 2 precursor                          | P59222 | R.SASSVEGPGALY@AR.V                                                                                                                                                                                           | Y615                                                        | 1532.14                                                                              | 0.43                                                         | none                                                                                                                                                                                                                                                       |
| Tight junction protein ZO-1                                            | P39447 | Y.LSAPGSEY@SMY.S<br>R.HEEQPAPAY@EVHNR.Y                                                                                                                                                                       | Y830<br>Y1164                                               | 1284.76<br>1756.95                                                                   | 0.77<br>0.17                                                 | 0.1283 Y.LSAPGSEYS@MY.S<br>none                                                                                                                                                                                                                            |
| Tight junction protein ZO-2                                            | Q9Z0U1 | R.JEIAQKHPDIY@AVPIK.A                                                                                                                                                                                         | Y1095                                                       | 1915.07                                                                              | 0.03                                                         | none                                                                                                                                                                                                                                                       |
| <b>CYTOSKELETON: ACTIN-ASSOCIATED</b>                                  |        |                                                                                                                                                                                                               |                                                             |                                                                                      |                                                              |                                                                                                                                                                                                                                                            |
| <b>Actins and actin-related proteins; Regulators of actin assembly</b> |        |                                                                                                                                                                                                               |                                                             |                                                                                      |                                                              |                                                                                                                                                                                                                                                            |
| Actin, alpha skeletal muscle (Beta-actin) (Gamma-actin)                | P68134 | K.IWHHTFY@NELR.V<br>M.VGMGQKDSY@VGDEAQSKRGIL.T                                                                                                                                                                | Y93<br>Y55                                                  | 1597.18<br>2319.05                                                                   | 1.43<br>0.93                                                 | none<br>0.0078 M.VGMGQKDS@YVGDEAQSKRGIL.T                                                                                                                                                                                                                  |
| Cofilin-1, non-muscle isoform                                          | P18760 | K.HELQANC*Y@EEVKDR.C<br>K.LTGIKHELQANC*Y@EEVKDR.C<br>L.TGIKHELQANC*Y@EEVKDR.C*TLA                                                                                                                             | Y139<br>Y139<br>Y139                                        | 1872.14<br>2384.74<br>2645.71                                                        | 1.35<br>1.62<br>1.53                                         | none<br>none<br>none                                                                                                                                                                                                                                       |
| Src substrate cortactin                                                | Q60598 | Y.TSEPVY@ETTEAPGHY.Q                                                                                                                                                                                          | Y466                                                        | 1762.41<br>1761.47                                                                   | 1.67<br>0.73                                                 | 0.0743 Y.T@SEPVYETTEAPGHY.Q<br>0.1176 Y.TSEPVYET@TEAPGHY.Q                                                                                                                                                                                                 |
| Vasodilator-stimulated phosphoprotein -- VASP                          | P70460 | F.SRVQIY@HNPTANSFR<br>R.VQIY@HNPTANSFR.V                                                                                                                                                                      | Y39<br>Y39                                                  | 1714.48<br>1627.93<br>1627.16                                                        | 0.67<br>1.15<br>0.38                                         | none<br>none<br>none                                                                                                                                                                                                                                       |
| N-WASP; Neural Wiskott-Aldrich syndrome protein                        | Q91YD9 | K.DRETSKVIY@DFIEK.T<br>K.VIY@DFIEK.T                                                                                                                                                                          | Y253                                                        | 1825.26<br>1106.98                                                                   | 2.36<br>0.43                                                 | none<br>none                                                                                                                                                                                                                                               |
| WD-repeat protein 1; Actin interacting protein 1 -- AIP1               | O88342 | K.AHDGGIY@AISWSPDSTHLLSASGDK.T                                                                                                                                                                                | Y237                                                        | 2665.90                                                                              | 0.67                                                         | 0.1286 K.AHDGGIY@AISWSPDSTHLLSASGDK.T                                                                                                                                                                                                                      |
| <b>Other actin-associated proteins</b>                                 |        |                                                                                                                                                                                                               |                                                             |                                                                                      |                                                              |                                                                                                                                                                                                                                                            |
| Band 4.1-like protein 2                                                | O70318 | N.TLRVDGDNII@VRHSNL.M<br>R.VDGDNIY@VR.H                                                                                                                                                                       | Y606<br>Y606                                                | 1953.32<br>1131.00                                                                   | 1.35<br>0.48                                                 | none<br>none                                                                                                                                                                                                                                               |
| Calponin-2                                                             | Q08093 | K.CASQSGMTAY@GT@RR.H                                                                                                                                                                                          | Y184                                                        | 1647.70                                                                              | -0.07                                                        | none                                                                                                                                                                                                                                                       |
| Calponin-3                                                             | Q9DAW9 | Y.HGEYPDDY@PREY.Q                                                                                                                                                                                             | Y316                                                        | 1621.87                                                                              | 1.24                                                         | 0.1644 Y.HGEYPDDY@PREY.Q                                                                                                                                                                                                                                   |
| LIM and SH3 domain protein 1 -- LASP-1                                 | Q61792 | H.HIPTSAPVY@QQPQQQM.T                                                                                                                                                                                         | Y173                                                        | 2061.91<br>2062.13                                                                   | 0.95<br>1.17                                                 | none<br>none                                                                                                                                                                                                                                               |
| Septin-2                                                               | P42208 | K.QQPTQFINPETPGY@VGFANLPNQVHR.K<br>K.QQPTQFINPETPGY@VGFANLPNQVHR.K.S                                                                                                                                          | Y17<br>Y17                                                  | 3033.49<br>3161.57                                                                   | 1.01<br>0.98                                                 | none<br>0.1711 K.QQPTQFINPET@PGYVGFANLPNQVHR.K.S                                                                                                                                                                                                           |
| Sickle tail-b (Sickle tail-a)                                          | Q75UV8 | R.NVY@YELNDVR.N<br>R.NEGFY@ADPYLYHEGR.M                                                                                                                                                                       | Y244<br>Y393                                                | 1365.69<br>1911.53<br>1911.11                                                        | 1.07<br>0.72<br>0.30                                         | 0.1787 R.NVY@YELNDVR.N<br>0.1910 R.NEGFYADPY@LYHEGR.M<br>none                                                                                                                                                                                              |
| <b>CYTOSKELETON: MICROTUBULE-ASSOCIATED</b>                            |        |                                                                                                                                                                                                               |                                                             |                                                                                      |                                                              |                                                                                                                                                                                                                                                            |
| none                                                                   |        |                                                                                                                                                                                                               |                                                             |                                                                                      |                                                              |                                                                                                                                                                                                                                                            |
| <b>CYTOSKELETON: OTHER</b>                                             |        |                                                                                                                                                                                                               |                                                             |                                                                                      |                                                              |                                                                                                                                                                                                                                                            |
| Vimentin                                                               | P20152 | R.FANY@IDKVR.F                                                                                                                                                                                                | Y116                                                        | 1205.86                                                                              | 0.25                                                         | none                                                                                                                                                                                                                                                       |

|                                                        |        |                                                                                                            |                                      |                                                     |                                      |                                                                                                |
|--------------------------------------------------------|--------|------------------------------------------------------------------------------------------------------------|--------------------------------------|-----------------------------------------------------|--------------------------------------|------------------------------------------------------------------------------------------------|
|                                                        |        | R.SLY@SSSPGGAYVTR.S                                                                                        | Y52                                  | 1525.08                                             | 0.37                                 | 0.0791 R.S@LYSSSPGGAYVTR.S                                                                     |
| <b>TRAFFICKING/TRANSPORT</b>                           |        |                                                                                                            |                                      |                                                     |                                      |                                                                                                |
| <b>Vesicle transport</b>                               |        |                                                                                                            |                                      |                                                     |                                      |                                                                                                |
| Double C2-like domain containing protein beta          | P70169 | K.TY@LKPVDVKKSK.H<br>K.TY@LKPVDVKKS*K.H                                                                    | Y309<br>Y309                         | 1501.15<br>1485.35                                  | -0.65<br>1.55                        | 0.0137 K.T@YLKPDVDKKS.H<br>0.0102 K.T@YLKPDVDKKS*K.H                                           |
| Intersectin 2                                          | Q9Z0R6 | R.GEPEALY@AAVTK.K                                                                                          | Y 921                                | 1330.16                                             | 1.51                                 | none                                                                                           |
| Low-density lipoprotein receptor precursor             | P35951 | F.DNPVY@QKTTEDELHIC*RSQDGY.T                                                                               | Y832                                 | 2748.60                                             | 0.42                                 | 0.1674 F.DNPVYQKT@TEDELHIC*RSQDGY.T                                                            |
| Nucleoporin-like protein RIP                           | Q8K2K6 | K.AGLQTADKY@AALANLDNIFSAGQGGDQSGFG<br>TTGKA                                                                | Y327                                 | 3583.60                                             | 1.91                                 | 0.0361 K.AGLQT@ADKYAALANLDNIFSAGQGGDQSGFGTTGKA                                                 |
| Transferrin receptor protein 1 - TFR                   | Q62351 | F.SNLFGEPLSY@TRF.S<br>R.SAFSNLFGEPLSY@TR.F                                                                 | Y20<br>Y20                           | 1668.43<br>1827.76                                  | 0.64<br>1.91                         | 0.0854 F.SNLFGEPLSY@TRF.S<br>0.1348 R.SAFSNLFGEPLS@YTR.F                                       |
| <b>Nucleocytoplasmic transport</b>                     |        |                                                                                                            |                                      |                                                     |                                      |                                                                                                |
| None                                                   |        |                                                                                                            |                                      |                                                     |                                      |                                                                                                |
| <b>Other transport</b>                                 |        |                                                                                                            |                                      |                                                     |                                      |                                                                                                |
| Gap junction alpha-1 protein -- Connexin 43            | P23242 | K.QASEQNWANY@SAEQNR.M                                                                                      | Y312                                 | 1976.23<br>1977.21                                  | 0.40<br>1.38                         | 0.1144 K.QASEQNWANY@AEQNR.M<br>0.0819 K.QASEQNWANY@AEQNR.M                                     |
| Lysosomal-associated transmembrane protein 4A          | Q60961 | K.IPEKEPPPY@LPA.-                                                                                          | Y230                                 | 1528.10                                             | 0.32                                 | none                                                                                           |
| Sodium bicarbonate cotransporter 2B homolog [fragment] | Q8BTY2 | K.DKDSKEDGRES@PSY@DTPSQR.V<br>K.DKDS*DKEDGRES@DTPSQR.V                                                     | Y92<br>Y92                           | 2574.16<br>2474.89                                  | 2.11<br>0.84                         | 0.0283 K.DKDSKEDGRES@PS@YDTPSQR.V<br>0.0490 K.DKDS*DKEDGRES@YDTPSQR.V                          |
| Solute carrier family 38, member 2                     | Q8CFE6 | K.SHY@ADVDPENQNFLESNLGK.K<br>K.SHY@ADVDPENQNFLESNLGK.K<br>L.KSHY@ADVDPENQNFL                               | Y41<br>Y41<br>Y41                    | 2471.70<br>2600.03<br>1744.38                       | 1.57<br>1.81<br>0.65                 | 0.0111 K.S@HYADVPENQNFLESNLGK.K<br>0.0594 K.S@HYADVPENQNFLESNLGK.K<br>0.0915 L.KS@HYADVPENQNFL |
| <b>METABOLIC AND BIOSYNTHETIC ENZYMES</b>              |        |                                                                                                            |                                      |                                                     |                                      |                                                                                                |
| <b>Glycolytic enzymes</b>                              |        |                                                                                                            |                                      |                                                     |                                      |                                                                                                |
| Alpha enolase (beta-enolase) (gamma enolase)           | P17182 | R.GNPTVEVDLY@TAK.G<br>R.AAVPSGASTGIY@EALELR.D                                                              | Y24<br>Y43                           | 1486.86<br>1885.67                                  | 0.14<br>0.73                         | 0.1715 R.GNPTVEVDLY@AK.G<br>0.0866 R.AAVPSGAST@GIYEALELR.D                                     |
| Glyceraldehyde-3-phosphate dehydrogenase -- GAPDH      | P16858 | K.LISWYDNEY@GYSNR.V                                                                                        | Y315                                 | 1861.30                                             | 1.50                                 | 0.1579 K.LISWYDNEYGY@SNR.V                                                                     |
| Phosphoglycerate mutase 1                              | Q9DBJ1 | R.FSGWY@DADLSPAGHEEAKR.G                                                                                   | Y25                                  | 2217.88                                             | 1.89                                 | none                                                                                           |
| Pyruvate kinase, isozyme M2                            | P52480 | R.EAEAIY@HLQLFEELRR.L                                                                                      | Y389                                 | 2168.61                                             | 0.52                                 | none                                                                                           |
| <b>Other metabolic/biosynthetic enzymes</b>            |        |                                                                                                            |                                      |                                                     |                                      |                                                                                                |
| Bifunctional purine biosynthesis protein PURH          | Q9CJW9 | R.VC*MVY@DLYPTLPLAVAYAR.A                                                                                  | Y290                                 | 2398.26                                             | 2.10                                 | 0.0520 R.VC*MVYDLY@PTLPLAVAYAR.A                                                               |
| Serine hydroxymethyltransferase, cytosolic             | P50431 | K.MLSQPLKDSDAEVY@SIKK.E                                                                                    | Y28                                  | 2246.33                                             | 1.18                                 | 0.0277 K.MLSQPLKDSDAEVYS@IIKK.E                                                                |
| TK: Transketolase                                      | P40142 | K.NMAEQIIQEIY@SQVQSK.K                                                                                     | Y275                                 | 2091.24                                             | 2.24                                 | 0.1724 K.NMAEQIIQEYS@QVQSK.K                                                                   |
| <b>RNA SYNTHESIS AND PROCESSING</b>                    |        |                                                                                                            |                                      |                                                     |                                      |                                                                                                |
| <b>Transcription machinery and regulation</b>          |        |                                                                                                            |                                      |                                                     |                                      |                                                                                                |
| Polymerase I and transcript release factor             | O54724 | F.KVMIIY@QDEVKLPKAL.S<br>K.VMIY@QDEVKLPKAL.L<br>F.TPDHVY@ARSKTAVY.K<br>K.SFTPDHVY@AR.S<br>R.KSFTPDHVY@AR.S | Y158<br>Y158<br>Y310<br>Y310<br>Y310 | 1856.39<br>1615.09<br>1788.15<br>1373.76<br>1500.74 | 1.38<br>1.26<br>1.26<br>2.12<br>1.00 | none<br>none<br>0.0051 F.TPDHVYARS@KTAVY.K<br>none<br>none                                     |
| <b>DEAD(DEAH)-box helicases</b>                        |        |                                                                                                            |                                      |                                                     |                                      |                                                                                                |
| ATP-dependent RNA helicase DDX3X                       | Q62167 | R.GRGDY@DGIGGR.G<br>R.GRGDY@DGIGGRGDR.S                                                                    | Y103<br>Y103                         | 1202.89<br>1531.65                                  | 0.36<br>0.97                         | none<br>none                                                                                   |
| <b>hnRNPs and snRNPs</b>                               |        |                                                                                                            |                                      |                                                     |                                      |                                                                                                |
| none                                                   |        |                                                                                                            |                                      |                                                     |                                      |                                                                                                |
| <b>Splicing factors</b>                                |        |                                                                                                            |                                      |                                                     |                                      |                                                                                                |

|                                                                                                                                 |        |                                                                                   |                              |                                          |                              |                                                                                          |
|---------------------------------------------------------------------------------------------------------------------------------|--------|-----------------------------------------------------------------------------------|------------------------------|------------------------------------------|------------------------------|------------------------------------------------------------------------------------------|
| none                                                                                                                            |        |                                                                                   |                              |                                          |                              |                                                                                          |
| <b>Other RNA binding and processing</b>                                                                                         |        |                                                                                   |                              |                                          |                              |                                                                                          |
| Poly(rC)-binding protein 2                                                                                                      | Q61990 | Y.TIQGQY@AIPQPDCLKHLQLAM.Q                                                        | Y232                         | 2447.26                                  | 1.01                         | 0.1333 Y.T@IQGQYAIQPDCLKHLQLAM.Q                                                         |
| Putative RNA-binding protein 3                                                                                                  | O89086 | R.YDSRPGGYGY@GYGR.S<br>Y.DSRPGGYGY@GY.G<br>R.YDSRPGGYGY@GR.S<br>R.YSGGNYRDNY@DN.- | Y124<br>Y124<br>Y126<br>Y151 | 1648.90<br>1272.00<br>1648.92<br>1517.93 | 1.21<br>0.49<br>1.23<br>0.36 | 0.0356 R.YDSRPGGYGY@GR.S<br>0.1976 Y.DSRPGGY@GYGY.G<br>0.0531 R.YDSRPGGYGY@GYGR.<br>none |
| RNA-binding protein 14                                                                                                          | Q8C2Q3 | R.LPDAHSDY@AR.Y                                                                   | Y645                         | 1224.48                                  | -0.06                        | none                                                                                     |
| <b>PROTEIN SYNTHESIS AND PROCESSING</b>                                                                                         |        |                                                                                   |                              |                                          |                              |                                                                                          |
| <b>tRNA synthetases</b>                                                                                                         |        |                                                                                   |                              |                                          |                              |                                                                                          |
| None                                                                                                                            |        |                                                                                   |                              |                                          |                              |                                                                                          |
| <b>Translation machinery</b>                                                                                                    |        |                                                                                   |                              |                                          |                              |                                                                                          |
| 40S ribosomal protein S10                                                                                                       | P63325 | R.IAIY@ELLFK.E                                                                    | Y12                          | 1190.22                                  | 0.56                         | none                                                                                     |
| 60S acidic ribosomal protein P0                                                                                                 | P14869 | K.IIQLDDY@PK.C                                                                    | Y24                          | 1299.35                                  | 1.67                         | none                                                                                     |
| 67 kDa polymerase-associated factor PAF67; Eukaryotic translation initiation factor 3 subunit 6-interacting protein -- Eif3s6ip | Q91YE4 | K.GDPQVYEELFSY@AC*PK.F                                                            | Y415                         | 1982.78                                  | -0.06                        | 0.1087 K.GDPQVYEELFS@YAC*PK.F                                                            |
| Eukaryotic initiation factor 4A-I                                                                                               | P60843 | R.GFKDQIY@DIFQK.L                                                                 | Y197                         | 1582.11                                  | 0.34                         | none                                                                                     |
| Elongation factor 1-alpha 1 -- eEF1A-1 (eEF1A-2)                                                                                | P10126 | K.STTTGHLIY@K.C<br>R.EHALLAY@TLGVK.Q                                              | Y29<br>Y141                  | 1201.02<br>1395.43                       | 0.42<br>0.69                 | none<br>0.0479 R.EHALLAY@TLGVK.Q                                                         |
| Laminin receptor 1 (ribosomal protein SA)                                                                                       | Q8BNL2 | R.ADHQPLTEASY@VNLPTIALC*NTDSPLR.Y                                                 | Y139                         | 3077.58                                  | 1.12                         | 0.0142 R.ADHQPLTEAS@YVNLPTIALC*NTDSPLR.Y                                                 |
| G1 to phase transition 2 -- GSPT2                                                                                               | Q9CY91 | K.Y@LIVLINK.M                                                                     | Y347                         | 1056.15                                  | 0.53                         | none                                                                                     |
| <b>Post-translational modifiers</b>                                                                                             |        |                                                                                   |                              |                                          |                              |                                                                                          |
| Probable palmitoyltransferase ZDHHC5                                                                                            | Q8VDZ4 | R.EPS@PVRY@DNLSR.H<br>R.LLPTGPPHREPS@PVRY@DNLSR.H                                 | Y533<br>Y533                 | 1593.84<br>2562.09                       | 1.12<br>0.82                 | none<br>0.1950 R.LLPTGPPHREPS@PVRY@DNLS@R.H                                              |
| Probable palmitoyltransferase ZDHHC8                                                                                            | Q5Y5T5 | F.SPVLGPRPREPS*PVRY@DNLS<br>R.PREPS*PVRY@DNLSR.T<br>L.RSQDLSLFGDSGVY@DTPSSY.S     | Y538<br>Y538<br>Y576         | 2211.91<br>1748.69<br>2262.51            | 0.76<br>0.82<br>0.55         | none<br>none<br>0.1555 L.RSQDLSLFGDS@GVYDTPSSY.S                                         |
| <b>Chaperones and associated proteins</b>                                                                                       |        |                                                                                   |                              |                                          |                              |                                                                                          |
| BAG-family molecular chaperone regulator-3                                                                                      | Q9JLV1 | K.THYPAAQQGEY@QPQQPVYHK.I                                                         | Y246                         | 2381.14                                  | 2.05                         | 0.1751 K.THYPAAQQGEY@QPQQPVY@HK.I                                                        |
| Heat shock 70 kDa protein 4                                                                                                     | Q61316 | K.LKKEDIY@AVEIVGGATR.I                                                            | Y336                         | 1944.08                                  | 2.04                         | none                                                                                     |
| Heat shock protein HSP 90-beta                                                                                                  | P11499 | K.SIY@YITGESK.E                                                                   | Y483                         | 1240.45                                  | -0.13                        | 0.1861 K.SIY@YITGESK.E                                                                   |
| <b>PROTEIN DEGRADATION</b>                                                                                                      |        |                                                                                   |                              |                                          |                              |                                                                                          |
| <b>Ubiquitin conjugation regulators</b>                                                                                         |        |                                                                                   |                              |                                          |                              |                                                                                          |
| E3 ubiquitin protein ligase CBL                                                                                                 | P22682 | K.IKPSSSANAIY@SLAARPLMPK.L                                                        | Y672                         | 2393.32                                  | 1.04                         | 0.0886 K.IKPSSSANAIY@LAARPLMPK.L                                                         |
| E3 ubiquitin-protein ligase CBL-B                                                                                               | Q3TTA7 | R.ASQDY@DQLPSSSDGSOAPARPPKPR.P                                                    | Y889                         | 2736.24                                  | 0.96                         | 0.0634 R.AS@QDYDQLPSSSDGSOAPARPPKPR.P                                                    |
| Probable E3 ubiquitin-protein ligase MGRN1                                                                                      | Q9D074 | L.RAVSPAIPSAPLY@EEITY.S                                                           | Y389                         | 2057.51                                  | 0.47                         | none                                                                                     |
| <b>Proteasome components</b>                                                                                                    |        |                                                                                   |                              |                                          |                              |                                                                                          |
| Proteasome subunit alpha type 2 -- PSMA2                                                                                        | P49722 | K.HIGLVY@SGMGPDYR.V                                                               | Y75                          | 1645.35                                  | 0.59                         | 0.0713 K.HIGLVYS@GMGPDYR.V                                                               |
| <b>Other proteases and endopeptidases</b>                                                                                       |        |                                                                                   |                              |                                          |                              |                                                                                          |
| ADAM 9 precursor                                                                                                                | Q61072 | K.ISSQGNLIPARPAPPLY@SSLT.-<br>N.LIPARPAPPLY@SSLT.-                                | Y841<br>Y841                 | 2430.83<br>1844.08                       | 0.55<br>0.07                 | 0.0069 K.ISSQGNLIPARPAPPLY@SSLT.-<br>0.1111 N.LIPARPAPPLY@SSLT.-                         |
| Prolyl endopeptidase                                                                                                            | Q9QUR6 | R.MTELY@DYPK.Y                                                                    | Y71                          | 1239.31                                  | -0.22                        | 0.1597 R.MTELYDY@PK.Y                                                                    |

| NUCLEAR PROTEINS                                                                                                               |               |                                                                                        |                      |                               |                      |                                                                                                             |
|--------------------------------------------------------------------------------------------------------------------------------|---------------|----------------------------------------------------------------------------------------|----------------------|-------------------------------|----------------------|-------------------------------------------------------------------------------------------------------------|
| Histone H2B type 1-B                                                                                                           | Q64475        | R.KESYSVY@VYK.V                                                                        | Y41                  | 1346.13                       | 0.48                 | 0.1132 R.KESYS@VYVYK.V                                                                                      |
| MISCELLANEOUS                                                                                                                  |               |                                                                                        |                      |                               |                      |                                                                                                             |
| Microfibril-associated glycoprotein 3 precursor                                                                                | Q922T2        | R.IKERPALDAQSGIY@VINPELGR.S                                                            | Y277                 | 2520.18                       | 0.84                 | 0.1937 R.IKERPALDAQS@GIYVINPELGR.S                                                                          |
| Psychosine receptor                                                                                                            | Q61038        | R.Y@LAVVYPLK.F                                                                         | Y115                 | 1145.67                       | 0.04                 | none                                                                                                        |
| FUNCTION UNKNOWN OR UNCERTAIN                                                                                                  |               |                                                                                        |                      |                               |                      |                                                                                                             |
| Named proteins of unknown/uncertain function                                                                                   |               |                                                                                        |                      |                               |                      |                                                                                                             |
| Carnitine deficiency-associated protein CDV3A (CDV3B)                                                                          | Q920I4        | R.KTPQGPEIY@SDTQFPQLQSTAK.H                                                            | Y213                 | 2601.76                       | 1.50                 | 0.0207 R.KTPQGPEIYS@DTQFPQLQSTAK.H                                                                          |
| Brain-specific angiogenesis inhibitor 1-associated protein 2-like protein 1                                                    | Q9DBJ3        | K.MIGKDY@DTLSK.Y<br>M.IGKDY@DTLSKY.S                                                   | Y274<br>Y274         | 1350.97<br>1383.30            | 0.34<br>0.64         | none<br>none                                                                                                |
| Suppression of tumorigenicity 5                                                                                                | Q924W7        | K.STLEENAYEDIVGGLPKENPY@EDVDLK.N                                                       | Y498                 | 3118.71                       | 1.26                 | none                                                                                                        |
| Pituitary tumor-transforming gene 1 protein-interacting protein precursor                                                      | Q8R143        | F.KEQNPY@EKF.-<br>K.EQNPY@EKF.-                                                        | Y171<br>Y171         | 1262.96<br>1134.80            | 0.38<br>0.32         | none<br>none                                                                                                |
| WW domain binding protein 4                                                                                                    | Q3TWW5        | K.FGDY@C*K.C<br>K.S*QPCKFGDY@C*K.C                                                     | Y15<br>Y15           | 870.85<br>1420.64             | 1.55<br>1.00         | none<br>none                                                                                                |
| Unnamed proteins of unknown/uncertain function                                                                                 |               |                                                                                        |                      |                               |                      |                                                                                                             |
| hypothetical protein -- Cdc105                                                                                                 | Q9D4K7        | K.FNQEM#Y@VTRGIK.G                                                                     | Y372                 | 1695.48<br>1696.16            | 0.63<br>1.32         | 0.0596 K.FNQEM#YVT@RGIK.G<br>none                                                                           |
| hypothetical HAT dimerisation/BED finger/Bipartite nuclear localization signal/Zinc finger BED-type profile containing protein | Q3UMD3        | W.HFFHVDPQY@TW.R                                                                       | Y145                 | 1558.04                       | 1.37                 | 0.1748 W.HFFHVDPQYT@W.R                                                                                     |
| hypothetical Intradiol ring-cleavage dioxygenase/WD40-like containing protein                                                  | Q3UHA3        | R.YNEMTY@IFDLLHQK.H                                                                    | Y2161                | 1895.60                       | 0.72                 | 0.0984 R.YNEMT@YIFDLLHQK.H                                                                                  |
| MKIAA1686 protein [fragment]                                                                                                   | Q6ZPK1        | K.ERPISMINEASNY@NMASDY@AVHPMSPVGR.T                                                    | Y65.Y71              | 3397.58                       | 1.09                 | 0.0204 K.ERPISMINEAS@NYNMASDY@AVHPMSPVGR.T                                                                  |
| PREDICTED: similar to Oligophrenin 1                                                                                           | UPI00005125B7 | K.LWLEAMDGKEPIY@TLPAISK.K<br>R.KLWLEAM#DGKEPIY@TLPAISK.K<br>R.KLWLEAMDGKEPIY@TLPAISK.K | Y371<br>Y371<br>Y371 | 2469.33<br>2612.99<br>2597.30 | 1.04<br>0.61<br>0.92 | 0.0264 K.LWLEAMDGKEPIYT@LPAISK.K<br>0.0171 R.KLWLEAM#DGKEPIYT@LPAISK.K<br>0.0221 R.KLWLEAMDGKEPIYT@LPAISK.K |
| PREDICTED: similar to zinc finger CCCH type containing 11A isoform 1                                                           | UPI00001C484B | R.IPFS@KTY@SKTEK.V                                                                     | Y399                 | 1588.48                       | -0.29                | 0.0722 R.IPFS@KTY@KTEK.V                                                                                    |
| Protein KIAA1914                                                                                                               | Q5DTU0        | K.VAQQLSLVGC*DVLDPDPSDHL@SFR.I                                                         | Y413                 | 2992.13                       | 1.71                 | 0.0033 K.VAQQLSLVGC*DVLDPDPSDHL@SFR.I                                                                       |
| Similar to RIKEN cDNA 4930527D15 gene [fragment]                                                                               | Q922B5        | K.EKLLLC*HGPS@LSPALSGVRY@NAEK.K                                                        | Y39                  | 2910.62                       | -1.84                | 0.0491 K.EKLLLC*HGPS@LSPALSGVRY@NAEK.K                                                                      |

**END**



**Table S1. Phosphotyrosine sites from the nontransformed mouse embryo fibroblast population**

| Protein Name(s) <sup>a</sup>                                  | UniProt # <sup>a</sup> | Peptide <sup>b</sup>                                                                                                                                                                                                                                                                                                                                                                                                                                                                                                         | pY site(s) <sup>b</sup>                                                                                                                                                                                                                | Comments <sup>i</sup>                                                                                                                                                                                                                |
|---------------------------------------------------------------|------------------------|------------------------------------------------------------------------------------------------------------------------------------------------------------------------------------------------------------------------------------------------------------------------------------------------------------------------------------------------------------------------------------------------------------------------------------------------------------------------------------------------------------------------------|----------------------------------------------------------------------------------------------------------------------------------------------------------------------------------------------------------------------------------------|--------------------------------------------------------------------------------------------------------------------------------------------------------------------------------------------------------------------------------------|
| <b>SIGNALING: PROTEIN KINASES AND PHOSPHATASES</b>            |                        |                                                                                                                                                                                                                                                                                                                                                                                                                                                                                                                              |                                                                                                                                                                                                                                        |                                                                                                                                                                                                                                      |
| <b>Tyrosine kinases (nonreceptor)</b>                         |                        |                                                                                                                                                                                                                                                                                                                                                                                                                                                                                                                              |                                                                                                                                                                                                                                        |                                                                                                                                                                                                                                      |
| Proto-oncogene tyrosine-protein kinase -- Src (Yes, Fyn, Hck) | Q80XU2                 | R.LIEDNEY@TAR.Q<br>F.LEDYFTSTEPQY@QPGENL.-<br>Y.FTSTEPQY@QPGENL.-                                                                                                                                                                                                                                                                                                                                                                                                                                                            | Y418<br>Y529<br>Y529                                                                                                                                                                                                                   | Kinase domain activation loop site; peptide identical in Fyn (P39688) and Yes (Q04736). Equivalent Hck (P08103) peptide (IIEDNEY@TAR) also not distinguishable by MS.<br>C-terminal negative regulatory site. Peptide unique to Src. |
| Proto-oncogene tyrosine-protein kinase -- Fyn (Yes)           | P39688                 | R.KLDNGGYY@ITTR.A<br>F.LEDYFTATEPQY@QPGENL.-<br>F.TATEPQY@QPGENL.-<br>Y.FTATEPQY@QPGENL.-                                                                                                                                                                                                                                                                                                                                                                                                                                    | Y213<br>Y527<br>Y527<br>Y527                                                                                                                                                                                                           | Site in SH2 domain. Peptide identical in Yes (Q04736)<br>C-terminal negative regulatory site; peptide identical in Yes (Q04736)                                                                                                      |
| Fyn-related kinase -- Frk                                     | Q922K9                 | F.C*PPEAPRSQEPERSHGQY@F.V<br>R.SQEPERSHGQY@FVALFDYQAR.T<br>K.LEDYFETDC*SY@SDTNNFIN.-<br>W.KLEDYFETDC*SY@SDTNNFIN.-<br>W.KLEDYFETDCS@Y@SDTNNFIN.-                                                                                                                                                                                                                                                                                                                                                                             | Y53<br>Y53<br>Y504<br>Y504                                                                                                                                                                                                             | Site in SH3 domain.<br>C-terminal negative regulatory site.                                                                                                                                                                          |
| Fer                                                           | P70451                 | K.VQENDGKEPPPVVNY@EEDAR.S<br>F.GMSRQEDGGVY@SSSGL.K                                                                                                                                                                                                                                                                                                                                                                                                                                                                           | Y402<br>Y715                                                                                                                                                                                                                           | Kinase domain activation loop site.                                                                                                                                                                                                  |
| Proto-oncogene tyrosine-protein kinase ABL1                   | P00520                 | M.TGDTY@TAHAGAKFPIKW.T<br>R.LMTGDTY@TAHAGAK.F                                                                                                                                                                                                                                                                                                                                                                                                                                                                                | Y393<br>Y393                                                                                                                                                                                                                           | Kinase domain activation loop site.                                                                                                                                                                                                  |
| Activated CDC42 kinase 1 -- ACK                               | O54967                 | M.RALPQNDHY@VMQEH.R<br><br>W.DARPLPPPAY@DDVAQEDDFE<br>F.ASDPKY@ATPQVIQAPGPRAGPC*.I<br>K.VSSTHY@YLLPERPPYLER.Y<br>R.KVSSSTHY@YLLPERPPYLER.Y<br>R.KVSS@THYY@LLPERPPYLER.Y                                                                                                                                                                                                                                                                                                                                                      | Y284<br><br>Y650<br>Y842<br>Y874<br>Y874<br>Y875                                                                                                                                                                                       | Kinase domain activation loop site.<br><br>The alanine residue preceding the Y-site is only found in ACK entry UPI0000D6355E                                                                                                         |
| Activated CDC42 kinase 1 -- ACK, isoforms 2 and 3             | O54967-2               | H.LGRVKKPTY@DPVSEDPDPLSSDF.K<br>K.KPTY@DPVSEDPDPLSSDFK.R.L<br>L.GRVKKPTY@DPVSEDPDPLSSDF.K<br>R.VKKPTY@DPVSEDPDPLSSDFK.R<br>R.VKKPTY@DPVSEDPDPLSSDFK.R.L                                                                                                                                                                                                                                                                                                                                                                      | Y518<br>Y518<br>Y518<br>Y518<br>Y518                                                                                                                                                                                                   | These peptides are unique to ACK isoforms 2 (O54967-2) and 3 (O54967-3).                                                                                                                                                             |
| Focal adhesion kinase, isoform 3 -- FAK                       | P34152-3               | M.RTHAVSVSETDDY@AEIIDEEDTY.T<br><br>R.THAVSVSETDDY@AEIIDEEDTYTMPSTR.D<br>R.Y@MEDSTY@YK.A<br>R.Y@MEDSTY@YKASK.G<br>R.Y@MEDSTY@Y@KASK.G<br>F.GLSRYM#EDSTY@Y.K<br>F.GLSRYMEDSTY@Y.K<br>L.GDFGLSRYM#EDSTY@Y.K<br>L.GDFGLSRYMEDSTY@Y.K<br>R.YM#EDST@YY@KASK.G<br>R.YM#EDSTY@Y@K.A<br>R.YM#EDSTY@Y@KASK.G<br>R.YM#EDSTY@YK.A<br>R.YM#EDSTY@YKASK.G<br>R.YM#EDSTYY@K.A<br>R.YMEDSTY@Y@K.A<br>R.YMEDSTY@Y@KASK.G<br>R.YMEDSTY@YK.A<br><br>R.YMEDSTY@YKASK.G<br>R.YMEDSTYY@K.A<br>Y.M#EDSTY@Y@KASKGKLPKW.M<br>Y.MEDSTY@Y@KASKGKLPKW.M | Y397<br>Y397<br>Y570,Y576<br>Y570,Y576<br>Y570,Y576,Y577<br>Y576<br>Y576<br>Y576<br>Y576<br>Y577<br>Y576,Y577<br>Y576,Y577<br>Y576<br>Y576<br>Y577<br>Y576,Y577<br>Y576,Y577<br>Y576<br>Y576<br>Y577<br>Y576,Y577<br>Y576,Y577<br>Y576 | Autophosphorylation site.<br><br>Kinase domain activation loop sites.                                                                                                                                                                |
| Tyrosine-protein kinase JAK1                                  | P52332                 | K.AIETDKEY@Y@TVKDDR.D                                                                                                                                                                                                                                                                                                                                                                                                                                                                                                        | Y1033,Y1034                                                                                                                                                                                                                            | Kinase domain activation loop sites.                                                                                                                                                                                                 |
| <b>Tyrosine kinases (receptor)</b>                            |                        |                                                                                                                                                                                                                                                                                                                                                                                                                                                                                                                              |                                                                                                                                                                                                                                        |                                                                                                                                                                                                                                      |
| Discoidin domain receptor 2 precursor -- DDR2                 | Q62371                 | R.IFPLRPDY@QEPSR.L<br>Y.DRIFPLRPDY@QEPSRL.I<br>R.NLY@SGDY@YR.I                                                                                                                                                                                                                                                                                                                                                                                                                                                               | Y481<br>Y481<br>Y735,Y739                                                                                                                                                                                                              | Kinase domain activation loop sites.                                                                                                                                                                                                 |
| Ephrin type-A receptor 2 precursor -- EphA2                   | Q03145                 | K.SEQLKPLKTY@VDPHTYEDPNQAVLK.F                                                                                                                                                                                                                                                                                                                                                                                                                                                                                               | Y589                                                                                                                                                                                                                                   |                                                                                                                                                                                                                                      |

|                                                                 |        |                                                                                                                                                                                                                                                                                                                 |                                                                                                                                                 |                                                                                             |
|-----------------------------------------------------------------|--------|-----------------------------------------------------------------------------------------------------------------------------------------------------------------------------------------------------------------------------------------------------------------------------------------------------------------|-------------------------------------------------------------------------------------------------------------------------------------------------|---------------------------------------------------------------------------------------------|
|                                                                 |        | L.KTY@VDPHTYEDPNQAVL.K<br>L.KTY@VDPHT@YEDPNQAVL.K<br>K.SEQLKPLKT@YVDPHTY@EDPNQAVLK.F<br>K.TYVDPHTY@EDPNQAVLK.F                                                                                                                                                                                                  | Y589<br>Y589<br>Y595<br>Y595                                                                                                                    |                                                                                             |
|                                                                 |        | L.KTYVDPHTY@EDPNQAVL.K<br>L.KTY@VDPHTY@EDPNQAVL.K<br>F.GLSRVLEDDPEATY@TTSGGKIPIRW.T<br>L.SRVLEDDPEATY@TTSGGKIPIRW.T<br>R.VLEDDPEATY@TTSGGK.I<br>R.VLEDDPEATY@TTSGGKIPIRW                                                                                                                                        | Y595<br>Y589,Y595<br>Y773<br>Y773<br>Y773                                                                                                       | Kinase domain activation loop site.                                                         |
| Ephrin type-A receptor 3 precursor -- EphA3 (EphA4, EphA5)      | P29319 | R.VLEDDPEAAY@TTR.G                                                                                                                                                                                                                                                                                              | Y779                                                                                                                                            | Kinase domain activation loop site. Peptide identical in EphA4 (Q03137) and EphA5 (Q0629).  |
| Ephrin type-A receptor 4 precursor -- EphA4                     | Q03137 | Y.VDPFTY@EDPNQAVREF.A                                                                                                                                                                                                                                                                                           | Y602                                                                                                                                            |                                                                                             |
| Ephrin type-A receptor 5 precursor -- EphA5                     | Q06029 | R.TY@IDPHTY@EDPNQAVHEFAK.E                                                                                                                                                                                                                                                                                      | Y489,Y495                                                                                                                                       |                                                                                             |
| Ephrin type-B receptor 2 precursor -- EphB2 (EphB1)             | P54763 | K.IY@IDPFTY@EDPNEAVR.E<br>Y.IDPFTY@EDPNEAVREF.A                                                                                                                                                                                                                                                                 | Y604,Y610<br>Y610                                                                                                                               | Peptide identical in EphB1.<br>Peptide identical in EphB1-4.                                |
| Ephrin type-B receptor 3 precursor -- EphB3 (EphB4)             | P54754 | K.VY@IDPFTY@EDPNEAVR.E<br>K.VYIDPFTY@EDPNEAVR.E<br>R.FLEDDPSDPTY@TSSLGGKIPIRW                                                                                                                                                                                                                                   | Y603,Y609<br>Y609<br>Y787                                                                                                                       | Peptide identical in EphB4 (Q91YM0)<br>Kinase domain activation loop site.                  |
| Eph receptor B4 -- EphB4                                        | Q91YM0 | K.HGQYLIGHGTVKY@IDPFTY@EDPNEAVR.E<br>K.HGQYLIGHGT*KVYIDPFTY@EDPNEAVR.E<br>Y.LIGHGTVKY@IDPFTY@EDPNEAVREF.A<br>R.FLEENSS@DPTY@TSSLGGKIPIRW<br>R.FLEENSSDPTY@TSSLGGKIPIRW                                                                                                                                          | Y590,Y596<br>Y596<br>Y590,Y596<br>Y774<br>Y774                                                                                                  | Kinase domain activation loop site.                                                         |
| Hepatocyte growth factor receptor precursor -- MET              | P16056 | F.GLARDMYDKEY@Y.S<br>F.GLARDMYDKEY@Y.S<br>R.DM#YDKEY@Y@SVHVK.T<br>R.DM#YDKEY@YS@VHVK.T<br>R.DM#YDKEY@YSVHVK.T<br>R.DMYDKEY@Y@SVHVK.T<br><br>R.DMYDKEY@Y@SVHNKTGAK.L<br>R.DMYDKEY@YSVHVK.T<br><br>R.DMYDKEY@YSVHNKT^GAK.L<br>R.DMYDKEY@YS^VHVK.T<br>R.DMYDKEY@Y@SVHVK.T<br><br>R.DMYDKEY@Y@SVHNKT^GAK.L          | Y1232<br>Y1233<br>Y1232,Y1233<br>Y1232<br>Y1232<br>Y1232,Y1233<br>Y1232<br><br>Y1232,Y1233<br>Y1232<br><br>Y1232<br>Y1232<br>Y1233<br><br>Y1233 | Kinase domain activation loop sites.                                                        |
| Insulin-like growth factor 1 receptor precursor -- IGF1R (InsR) | Q06751 | R.DIY@ETDY@Y@RK.G<br>R.DIY@ETDY@YRK.G<br>R.DIYETDY@YRK<br>R.DIYETDY@YRK.G                                                                                                                                                                                                                                       | Y1163,<br>Y1167,Y1168<br>Y1163, Y1167<br>Y1167<br>Y1168                                                                                         | Kinase domain activation loop sites. Peptide identical in Insulin receptor (InsR, KinBase). |
| Proto-oncogene tyrosine-protein kinase -- MER                   | Q60805 | K.KIY@SGDY@YR.Q<br>K.KIYSGDY@YR.Q                                                                                                                                                                                                                                                                               | Y744,Y748<br>Y748                                                                                                                               | Kinase domain activation loop sites. Peptide identical in Tyro3 (KinBase). Axl family.      |
| Tyrosine-protein kinase receptor UFO precursor -- Axl           | Q00993 | F.GLSKKIYNGDY@YR<br>K.KIYNGDY@YR.Q<br>K.IYNGDY@YR.Q<br>K.IYNGDYY@R.Q<br>F.GLSKKIYNGDYY@R                                                                                                                                                                                                                        | Y696<br>Y696<br>Y696<br>Y697<br>Y697                                                                                                            | Kinase domain activation loop sites.                                                        |
| <b>Other protein kinases</b>                                    |        |                                                                                                                                                                                                                                                                                                                 |                                                                                                                                                 |                                                                                             |
| CDC2: Cell division control protein 2 homolog - CDK1 (CDK2)     | P11440 | K.IEKIGEGT@Y@GVVYK.G<br><br>K.IEKIGEGTY@GVVYK<br>K.IEKIGEGTY@GVVYK.G<br><br>K.IEKIGEGT*Y@GVVYK.G<br><br>K.IGEGT@Y@GVVYK.G<br>K.IGEGTY@GVVYK.G<br><br>K.IGEGTY@GVVYKGR.H<br>K.IGEGT*Y@GVVYK.G<br>K.IGEGT*Y@GVVYKGR.H<br>Y.IKIEKIGEGTY@GVVYK<br>Y.IKIEKIGEGT*Y@GVVYK<br>-.DYIKIEKIGEGTY@GVVYK<br>K.IGEGTYGVVY@K.G | Y15<br><br>Y15<br>Y15<br><br>Y15<br>Y15<br><br>Y15<br>Y15<br>Y15<br>Y15<br>Y15<br>Y15<br>Y15<br>Y19                                             | Peptide identical in CDK2.<br><br>Peptide identical in CDK2.                                |
| Cell division protein kinase 2 -- CDK2                          | P97377 | K.VEKIGEGTY@GVVYK.A                                                                                                                                                                                                                                                                                             | Y15                                                                                                                                             |                                                                                             |

|                                                                                   |        |                                                                                                                                                                                                                                                                                                                                                                                                                                    |                                                                                                                  |                                                                                                                                                  |
|-----------------------------------------------------------------------------------|--------|------------------------------------------------------------------------------------------------------------------------------------------------------------------------------------------------------------------------------------------------------------------------------------------------------------------------------------------------------------------------------------------------------------------------------------|------------------------------------------------------------------------------------------------------------------|--------------------------------------------------------------------------------------------------------------------------------------------------|
| Dual-specificity tyrosine-phosphorylation regulated kinase 1A -- DYRK1A (DYRK1B)  | Q61214 | K.VYNDGYDDDN@DYIVK.N<br>R.KVYNDGYDDDN@DYIVK.N<br><br>R.KVYNDGYDDDN@DYIVKNGEK.W<br>Y.NDGYDDDN@DYIVKNGEK.W<br><br>R.IYQY@IQSR.F<br>Y.QY@IQSRFY.R                                                                                                                                                                                                                                                                                     | Y145<br>Y145<br><br>Y145<br>Y145<br><br>Y321<br>Y321                                                             | Site lies just N-terminal to the kinase domain.<br><br><br><br><br><br>Kinase domain activation loop site. Identical peptide in DYRK1B (Q9Z188). |
| Glycogen synthase kinase-3 beta -- GSK-3beta (GSK3alpha)                          | Q9WV60 | K.QLVRGEPNVS@IC*SR.Y<br>K.QLVRGEPNVS@IC*SR.Y.R<br>L.VRGEPNVS@IC*.S<br>L.VRGEPNVS@IC*S@R.Y.R<br>L.VRGEPNVS@IC*SR.Y<br><br>L.VRGEPNVS@IC*SR.Y.R<br><br>L.VRGEPNVS@IC*S*RY.Y<br>N.VSY@IC*SR.Y<br>N.VSY@IC*SR.Y.R<br>Q.LVRGEPNVS@IC*SR.Y<br><br>Q.LVRGEPNVS@IC*SR.Y.R<br>R.GEPNVS@IC*SR.Y<br>R.GEPNVS@IC*SR.Y.R                                                                                                                        | Y216<br>Y216<br>Y216<br>Y216<br>Y216<br><br>Y216<br><br>Y216<br>Y216<br>Y216<br>Y216<br><br>Y216<br>Y216<br>Y216 | Activation loop site. All peptides identical in GSK3alpha.                                                                                       |
| Homeodomain-interacting protein kinase 1 -- HIPK1 (HIPK2)                         | O88904 | H.VSKAVC*STY@LQSR.Y<br><br>K.AVC*STY@LQSR.Y<br>S.KAVC*STY@LQSR.Y                                                                                                                                                                                                                                                                                                                                                                   | Y352<br><br>Y352<br>Y352                                                                                         | Kinase domain activation loop site. Peptides identical in HIPK2.                                                                                 |
| Homeodomain-interacting protein kinase 3 -- HIPK3                                 | Q9ERH7 | H.VSKTVC*STY@L.Q<br>H.VSKTVC*STY@LQSR.Y<br><br>K.TVC*STY@LQSR.Y                                                                                                                                                                                                                                                                                                                                                                    | Y359<br>Y359<br><br>Y359                                                                                         | Kinase domain activation loop site.                                                                                                              |
| Hypothetical Protein kinase-like (PK-like) structure containing protein -- SgK223 | Q8CB68 | K.C*VGQAAELQPASLLRDPVQPEPIY@AESAK.R<br><br>K.C*VGQAAELQPASLLRDPVQPEPIY@AESAK.R                                                                                                                                                                                                                                                                                                                                                     | Y196<br><br>Y196                                                                                                 | A protein kinase of the NKf3 family.                                                                                                             |
| Mitogen-activated protein kinase 3 -- ERK1                                        | Q63844 | F.GLARIADPEHDHTGFLT@EY@VATR.W<br>F.GLARIADPEHDHTGFLT@EY@VATR.W<br>F.GLARIADPEHDHTGFLT*EY@VATR.W<br>F.GLARIADPEHDHTGFLT*EY@VATRWY.R<br>F.LTEY@VATR.W<br>R.IADPEHDHTGFLT@EY@VATR.W<br>R.IADPEHDHTGFLT@EY@VATR.W<br>R.IADPEHDHTGFLT*EY@VATR.W                                                                                                                                                                                         | Y205<br>Y205<br>Y205<br>Y205<br>Y205<br>Y205<br>Y205<br>Y205                                                     | Kinase domain activation loop site.                                                                                                              |
| Mitogen-activated protein kinase 1 -- ERK2                                        | P63085 | F.GLARVADPDHDHTGFLT@EY@VATRW.Y<br>F.GLARVADPDHDHTGFLT@EY@VATRWY.R<br>F.GLARVADPDHDHTGFLT@EY@VATRWY.R<br>F.GLARVADPDHDHTGFLT*EY@VATRW.Y<br>F.GLARVADPDHDHTGFLT*EY@VATRWY.R<br>F.GLARVADPDHDHT*GFLT@EY@VATRW.Y<br>R.VADPDHDHTGFLT@EY@VATR.W<br>R.VADPDHDHTGFLT@EY@VATR.W<br><br>R.VADPDHDHTGFLT@EY@VATRW.Y<br>R.VADPDHDHTGFLT@EY@VATRW.Y<br>R.VADPDHDHTGFLT*EY@VATR.W<br>R.VADPDHDHTGFLT*EY@VATR.W<br><br>R.VADPDHDHTGFLT*EY@VATRW.Y | Y185<br>Y185<br>Y185<br>Y185<br>Y185<br>Y185<br>Y185<br>Y185<br><br>Y185<br>Y185<br>Y185<br>Y185<br><br>Y185     | Kinase domain activation loop site.                                                                                                              |
| Mitogen-activated protein kinase 7 -- ERK5                                        | Q9WVS8 | R.GLC*TSPEHQYFM#TEY@VATR.W<br>R.GLC*TSPEHQYFMTEY@VATR.W                                                                                                                                                                                                                                                                                                                                                                            | Y221<br>Y221                                                                                                     | Kinase domain activation loop site.                                                                                                              |
| Mitogen-activated protein kinase 8 -- JNK1                                        | Q91Y86 | R.TAGTSFMTPY@VVTR.Y                                                                                                                                                                                                                                                                                                                                                                                                                | Y185                                                                                                             | Kinase domain activation loop site. Peptide identical in JNK3 (Q61831)                                                                           |
| Mitogen-activated protein kinase 9 -- JNK2                                        | Q9WTU6 | R.TAC*TNFMTPY@VVTR.Y                                                                                                                                                                                                                                                                                                                                                                                                               | Y185                                                                                                             |                                                                                                                                                  |
| Mitogen-activated protein kinase 14 -- MAP kinase p38 alpha                       | P47811 | F.GLARHTDDEM#TG@VATRW.Y<br>F.GLARHTDDEMTGY@VATRW.Y<br><br>F.GLARHTDDEMTGY@VATRWY.R<br>L.ARHTDDEMTGY@VATRW.Y<br>L.DFGLARHTDDEMTGY@VATRW.Y<br>R.HTDDEM#TG@VATR.W<br>R.HTDDEMTGY@VATR.W                                                                                                                                                                                                                                               | Y181<br>Y181<br><br>Y181<br>Y181<br>Y181<br>Y181<br>Y181                                                         | Kinase domain activation loop site.                                                                                                              |

|                                                                                                    |        |                                                                                                                                                                                                                                                                 |                                                                  |                                                                                                                                                                                                                                                                                                     |
|----------------------------------------------------------------------------------------------------|--------|-----------------------------------------------------------------------------------------------------------------------------------------------------------------------------------------------------------------------------------------------------------------|------------------------------------------------------------------|-----------------------------------------------------------------------------------------------------------------------------------------------------------------------------------------------------------------------------------------------------------------------------------------------------|
| Serine/threonine-protein kinase PAK 2                                                              | Q8CIN4 | K.LRTIVSIGDPKKYTRY@EK.I                                                                                                                                                                                                                                         | Y252                                                             | PKN family.                                                                                                                                                                                                                                                                                         |
| Serine/threonine-protein kinase -- PFTAIRE-1                                                       | O35495 | K.LEKLGECS@Y@ATVYK.G                                                                                                                                                                                                                                            | Y146                                                             | CDK family.                                                                                                                                                                                                                                                                                         |
| Serine/threonine-protein kinase -- PCTAIRE-3                                                       | Q04899 | K.LDKLGEPTY@ATVFK.G                                                                                                                                                                                                                                             | Y132                                                             | CDK family.                                                                                                                                                                                                                                                                                         |
| Serine/threonine-protein kinase -- PRP4                                                            | Q61136 | C.DFGS@AS@HVADNDITPY@LVSRFY.R<br>F.GSASHVADNDITPY@LVSRFY<br>F.GSASHVADNDITPY@LVSRFY.R<br>H.VADNDITPY@LVSRFY<br>H.VADNDITPY@LVSRFY.R<br>K.LC*DFGSASHVADNDITPY@LVSR.F<br><br>K.LCDFGSAS@HVADNDITPY@LVSR.F<br>L.C*DFGSASHVADNDITPY@LVSRFY<br>S.HVADNDITPY@LVSRFY.R | Y849<br>Y849<br>Y849<br>Y849<br>Y849<br><br>Y849<br>Y849<br>Y849 | DYRK family. Kinase domain activation loop site.                                                                                                                                                                                                                                                    |
| RIKEN CDNA C230081A13: hypothetical Protein kinase A anchoring domain containing protein -- SgK269 | Q8BX56 | K.FNSYNNAGM#PPFPIIHDEPSY@AR.S<br>K.NAIKVPVIVPNAY@DNLAIV@K.S<br>K.NAIKVPVIVPNAY@DNLAIVK.S<br><br>K.NAIKVPVIVPNAYDNLAIV@K.S<br>K.VPVIINPNAY@DNLAIVK.S                                                                                                             | Y613<br>Y632,Y638<br>Y632<br><br>Y638<br>Y632                    | This entry contains the N terminal region of a putative protein serine/threonine kinase called SgK269 (NKF3 family) in the KinBase resource. MKIAA2002 protein [fragment] (Q69Z38) contains the SgK269 kinase domain. There is no overlap between Q8BX56 and Q69Z38. Possible alternative splicing. |
| <b>Protein phosphatases</b>                                                                        |        |                                                                                                                                                                                                                                                                 |                                                                  |                                                                                                                                                                                                                                                                                                     |
| Protein phosphatase 2 regulatory subunit B56 delta isoform                                         | Q99PC9 | R.KSELQDQVY@T*IK.A                                                                                                                                                                                                                                              | Y572                                                             |                                                                                                                                                                                                                                                                                                     |
| Receptor-type tyrosine-protein phosphatase alpha -- R-PTP-alpha                                    | P18052 | K.VVQEYIDAFSDY@ANFK.-<br><br>Y.IDAFSDY@ANFK.-<br>Y.KVVQEYIDAFSDY@ANF.K<br>Y.KVVQEYIDAFSDY@ANFK.-                                                                                                                                                                | Y825<br><br>Y825<br>Y825<br>Y825                                 |                                                                                                                                                                                                                                                                                                     |
| Tyrosine-protein phosphatase, non-receptor type 11 -- SHP-2                                        | P35235 | H.IKIQNTGDY@YDLY.G<br>K.IQNTGDY@YDLYGGEK.F<br>R.EDSARVY@ENVGLMQQR.S<br>R.VY@ENVGLMQQR.S                                                                                                                                                                         | Y62<br>Y62<br>Y584<br>Y584                                       |                                                                                                                                                                                                                                                                                                     |
| <b>SIGNALING: SMALL G PROTEINS AND REGULATORS</b>                                                  |        |                                                                                                                                                                                                                                                                 |                                                                  |                                                                                                                                                                                                                                                                                                     |
| Glucocorticoid receptor DNA binding factor 1 [fragment] -- p190RhoGAP                              | Q91YM2 | R.NEEENIY@SVPHDSTQGK.I<br><br>W.MPQDGFDPDSDY@AEPMDAVKPRNEEENIY.S                                                                                                                                                                                                | Y943<br><br>Y925                                                 | Represses transcription of the glucocorticoid receptor by binding to a cis-acting regulatory sequence. Also known as p190RhoGAP. Phosphorylation of this putative Src site positively controls GAP activity, thus inhibiting Rho.                                                                   |
| Breast cancer anti-estrogen resistance protein 3 -- BCAR3                                          | Q9QZK2 | F.IFRDPY@LLDPTLEY.V<br>F.IFRDPY@LLDPTLEYVKF.S<br>Y.LLDPTLEY@VKF.S<br>R.KGENFIFRDPY@LLDPTLEY@VK.F<br>R.KGENFIFRDPY@LLDPTLEYVK.F<br>L.RLSEAY@SRVQY.Q                                                                                                              | Y103<br>Y103<br>Y111<br>Y103,Y111<br>Y103<br>Y206                | May act as an adapter protein and couple activated growth factor receptors to signaling molecules that regulate src kinase activity and promote cell migration. Contains 1 Ras-GEF domain and 1 SH2 domain.                                                                                         |
| ARF GTPase-activating protein -- GIT1                                                              | Q68FF6 | R.SQSELDDQHDY@DS@VAS@DEDTDQEPLPSAG<br>ATR.N<br><br>R.SQSELDDQHDY@DS@VAS*DEDTDQEPLPSAGA<br>TR.N<br>F.HSTELEDDAIY@SVHVPAGLYR<br>R.LQPFHS@TELEDDAIY@SVHVPAGLYR.I<br>R.LQPFHSTELEDDAIY@SVHVPAGLYR.I<br>R.LQPFHST*ELEDDAIY@SVHVPAGLYR.I                              | Y392<br><br>Y392<br>Y554<br>Y554<br>Y554<br>Y554                 | Possesses ARF-GAP activity. Functions as part of a multi-molecular signaling complex that regulates membrane protrusions and cell migration.                                                                                                                                                        |
| ARF GTPase-activating protein -- GIT2                                                              | Q9JLQ2 | K.QNSTPESDY@DNTAC*DPEPDDTGSTR.K<br>K.QNSTPESDY@DNTAC*DPEPDDTGSTR.K                                                                                                                                                                                              | Y541<br>Y541                                                     | Possesses ARF-GAP activity. Interacts with G protein-coupled receptor kinases, paxillin, PIX exchange factors. Important in integrin-mediated cell adhesion.                                                                                                                                        |
| Ras GTPase-activating-like protein -- IQGAP1                                                       | Q9JKF1 | K.LQQTY@SALNSK.A                                                                                                                                                                                                                                                | Y1510                                                            | Binds to activated CDC42 but does not stimulate its GTPase activity. Could serve as an assembly scaffold for the organization of a multimolecular complex.                                                                                                                                          |
| Ras and Rab interactor 1 -- Rin1                                                                   | Q921Q7 | K.EKPSTDPLY@DTPDTR.G                                                                                                                                                                                                                                            | Y35                                                              | Can affect Ras signaling by competing with RAF1, by enhancing signaling from ABL1 and ABL2, and possibly by functioning as a GEF for RAB5A.                                                                                                                                                         |
| Rho-GTPase-activating protein 12                                                                   | Q8C0D4 | M.RATT@PPNQGRPDS@PVY@ANLQEL.K<br>M.RATT@PPNQGRPDS@PVY@ANLQEL.K<br>R.AT@TPPNQGRPDS@PVY@ANLQEL.K<br>R.AT@TPPNQGRPDS*PVY@ANLQEL.K<br>R.ATT@PPNQGRPDS@PVY@ANLQEL.K                                                                                                  | Y241<br>Y241<br>Y241<br>Y241<br>Y241                             | Contains 1 PH domain, 1 Rho-GAP domain, 1 SH3 domain, 2 WW domains. GTPase activator for the Rho-type GTPase.                                                                                                                                                                                       |
| <b>SIGNALING: OTHER</b>                                                                            |        |                                                                                                                                                                                                                                                                 |                                                                  |                                                                                                                                                                                                                                                                                                     |
| Abl interactor 1 -- Abi-1                                                                          | Q8CBW3 | K.TLEPVKPTVPNDY@MTSPAR.L                                                                                                                                                                                                                                        | Y212                                                             | SH3-containing adapter protein.                                                                                                                                                                                                                                                                     |

|                                                               |        |                                                                                                                                                                                                                                                                                        |                                                                      |                                                                                                                                                                              |
|---------------------------------------------------------------|--------|----------------------------------------------------------------------------------------------------------------------------------------------------------------------------------------------------------------------------------------------------------------------------------------|----------------------------------------------------------------------|------------------------------------------------------------------------------------------------------------------------------------------------------------------------------|
|                                                               |        | R.NTPY@KTLEPVKPTVPNDY@MTSPAR.L<br>R.NTPYKT@LEPVKPTVPNDY@MTSPAR.L<br>Y.KTLEPVKPTVPNDY@MTSPAR.L.G                                                                                                                                                                                        | Y212<br>Y212<br>Y212                                                 |                                                                                                                                                                              |
| Annexin A2                                                    | P07356 | K.LSLEGDHSTPPSAY@GSVKPYTNFDAER.D<br>K.LSLEGDHSTPPSAY@GSVKPYTNFDAERDALNIET<br>AVK.T<br>C.KLSLEGDHSTPPSAY@GSVKPY.T<br>L.SLEGDHSTPPSAY@GSVKPY.T<br>K.RKY@GKSLYYYIQDQTK.G                                                                                                                  | Y23<br>Y23<br>Y23<br>Y23<br>Y310                                     |                                                                                                                                                                              |
| Ankyrin repeat and SAM domain-containing protein 1 -- ANKS1   | P59672 | L.AVRPRIQS@SAPQEEEEHPY@ELL.L<br>L.AVRPRIQS@SAPQEEEEHPY@ELL.L<br>L.AVRPRIQSSAPQEEEEHPY@ELL.L<br>L.AVRPRIQSSAPQEEEEHPY@ELL.L<br>L.AVRPRIQSSAPQEEEEHPY@ELL.L                                                                                                                              | Y471<br>Y471<br>Y471<br>Y471<br>Y471                                 | Phosphorylated in response to EGF and PDGF. Contains seven ankyrin repeats and two sterile alpha motif domain. Alternative name is Odin.                                     |
| Calmodulin                                                    | P62204 | R.VFDKDGNGY@ISAAELR.H<br>F.RVFDKDGNGY@ISAAELR                                                                                                                                                                                                                                          | Y99<br>Y99                                                           | Mediates the control of a large number of enzymes by Ca(2+).                                                                                                                 |
| Caveolin-1                                                    | P49817 | K.YVDSEGHLY@TVPIR.E                                                                                                                                                                                                                                                                    | Y14                                                                  | May act as a scaffolding protein within caveolar membranes.                                                                                                                  |
| Caveolin-2                                                    | Q9WVC3 | F.MADDAYS@HHS@GVDY@ADPEKY.V<br>F.MADDAYS@HHS*GVDY@ADPEKY.V<br>F.MADDAYSHHS@GVDY@ADPEKY.V<br>F.MADDAYSHHSGVDY@ADPEKY.V<br>F.MADDAYS*HHS@GVDY@ADPEKY.V<br>Y.SHHSGVDY@ADPEKY.V                                                                                                            | Y27<br>Y27<br>Y27<br>Y27<br>Y27<br>Y27                               |                                                                                                                                                                              |
| Proto-oncogene c-Crk                                          | Q64010 | L.IGNGQEGSHQPQLGGPEPGPY@AQPSVN.T<br>Y.AQPSVNTPLNQLNGPIY@ARVIQ.K<br>K.RVFNAY@DKTALALEVVELVK.V<br>Q.KRVFNAY@DKTALA                                                                                                                                                                       | Y221<br>Y239<br>Y251<br>Y251                                         | Adaptor protein with SH2-SH3-SH3 domain structure.                                                                                                                           |
| Crk-like protein                                              | P47941 | Y.VRTLY@DFPGNDAEDLPF.K<br>H.GKHGNRNS@NSY@GIPEPAHAY.A<br>H.GNRNS@NSY@GIPEPAHAY.A<br>H.GNRNSNSY@GIPEPAHAY.A<br>R.NSNSY@GIPEPAHAYAQPQTTTTLPTVASTPGAAL<br>NPLPSTQNGPVFAK.A<br>R.NSNSYGIPEPAHAY@AQPQTTTTLPTVASTPGAAL<br>NPLPSTQNGPVFAK.A                                                    | Y132<br>Y198<br>Y198<br>Y198<br>Y198<br>Y207                         | Adaptor protein with an SH2-SH3-SH3 domain structure.                                                                                                                        |
| Docking protein 1 (Dok1)                                      | P97465 | R.IPPGPSQDSVY@SDPLGSTPAGAGEGVHSK.K<br>K.KPLYWDLY@GHVQQQLLK.T<br>K.LTDSKEDIY@DEPEGLAPAPPR.G<br>K.TKLTDSKEDIY@DEPEGLAPAPPR.G<br>L.KTKLTDSKEDIY@DEPEGLAPAPPRGLY.D<br>L.LKTKLTDSKEDIY@DEPEGLAPAPPRGLY.D<br>R.LKEEGYELPYNPATDDY@AVPPPR.S<br>F.SSDTALY@SQVQKSGTSGAW.D<br>K.GFSSDTALY@SQVQK.S | Y314<br>Y340<br>Y361<br>Y361<br>Y361<br>Y361<br>Y408<br>Y450<br>Y450 |                                                                                                                                                                              |
| Ephrin-B2 precursor (Ephrin-B1)                               | P52800 | R.TADSVFC*PHY@EK.V<br>K.VSGDY@GHPVYIVQEMPPQSPANIYYKV.-<br>K.VSGDYGHPVY@IVQEMPPQSPANIY@YKV.-<br>K.VSGDYGHPVYIVQEM#PPQSPANIY@YKV.-<br>K.VSGDYGHPVYIVQEMPPQSPANIY@YKV.-                                                                                                                   | Y307<br>Y314<br>Y319,Y333<br>Y333<br>Y333                            | Peptide identical in Ephrin-B1 (P52795).<br>Peptide identical in Ephrin-B1 (P52795).<br>Peptide identical in Ephrin-B1 (P52795).<br>Peptide identical in Ephrin-B1 (P52795). |
| Fibroblast growth factor receptor substrate 2 -- FRS2         | Q8C180 | K.LVY@ENINGLSIPSASGVR.R<br>R.RPALLNY@ENLPSLPPVWEAR.K                                                                                                                                                                                                                                   | Y306<br>Y349                                                         | Adaptor protein involved in fibroblast growth factor receptor signaling.                                                                                                     |
| Fish protein -- TKS5                                          | O89032 | K.VKYEEPEY@DVPAFGDFDSEPEMNEEPSGDR.G                                                                                                                                                                                                                                                    | Y557                                                                 | SH3 and PX domain-containing protein and Src substrate                                                                                                                       |
| GRB2-associated binding protein 1 -- Gab1                     | Q9QYY0 | K.HGMNGFFQQMMY@DC*PPSR.L<br>K.DASSQDC*Y@DIPR.T<br>L.RKDASSQDC*Y@DIPRTE.F<br>N.KLRKDASSQDC*Y@DIPRTE.F<br>R.KDASSQDC*Y@DIPR.T                                                                                                                                                            | Y242<br>Y407<br>Y407<br>Y407<br>Y407                                 | A member of the IRS-1-like multisubstrate docking protein family. Contains an N-terminal pleckstrin homology domain and several proline-rich SH3 domain-binding sequences.   |
| Insulin receptor substrate 2 -- IRS-2                         | P81122 | K.SSSNLGADDGY@MPM#TPGAALR.S<br>K.SSSNLGADDGY@MPMTPGAALR.S<br>K.SDDY@MPMSPTSVSAPK.Q                                                                                                                                                                                                     | Y649<br>Y649<br>Y671                                                 |                                                                                                                                                                              |
| Insulin receptor substrate-2 (IRS-2) (4PS) homolog [Fragment] | Q3U2I0 | R.SYKAPC*SC*SGDDDDQY@VLMSSPVGR.I                                                                                                                                                                                                                                                       | Y754                                                                 | The equivalent peptide in above P81122 entry is RSYKAPCSCSGDNDQYVLMSSPVGR.I.                                                                                                 |
| Kin of IRRE-like protein 1 precursor                          | Q80W68 | K.AIY@SSFKDDVDLQ.K<br>K.AIY@SSFKDDVDLQDLR.C                                                                                                                                                                                                                                            | Y604<br>Y604                                                         | Signaling protein that needs the presence of TEC kinases to fully trans-activate the transcription factor AP-1.                                                              |

|                                                                             |          |                                                                                                                                                                                                                                                                                                                                                                                                                                                                                                                                                     |                                                                                                                                                      |                                                                                                                                                                                            |
|-----------------------------------------------------------------------------|----------|-----------------------------------------------------------------------------------------------------------------------------------------------------------------------------------------------------------------------------------------------------------------------------------------------------------------------------------------------------------------------------------------------------------------------------------------------------------------------------------------------------------------------------------------------------|------------------------------------------------------------------------------------------------------------------------------------------------------|--------------------------------------------------------------------------------------------------------------------------------------------------------------------------------------------|
|                                                                             |          | R.EEYEMKDPTNGY@YNVR.A<br>R.AVLY@ADY@RAPGPTR.F<br>Y.NVRAHEDRPSSRAVLY@ADY.R<br>R.TPY@EAYDPIGK.Y<br>Y.RLGYPOAPPGLERTPY@EAYDPIGKY.A<br>R.TPYEAY@DPIGK.Y                                                                                                                                                                                                                                                                                                                                                                                                 | Y637<br>Y654, Y657<br>Y654<br>Y753<br>Y753<br>Y756                                                                                                   |                                                                                                                                                                                            |
| myelin protein zero-like 1 -- PZR                                           | Q3TEW6   | K.SPSSAGSHQGPVIY@AQLDHSGGHSHGK.I<br>K.INKSESVVY@ADIR.K<br><br>K.INKSESVVY@ADIRK.D-<br>K.SESVVY@ADIR.K<br>N.KSESVVY@ADIRK.D-<br>H.SGKINKSESVVY@ADIRK.D-                                                                                                                                                                                                                                                                                                                                                                                              | Y242<br>Y264<br><br>Y264<br>Y264<br>Y264<br>Y264                                                                                                     | An immunoglobulin superfamily cell surface protein. Contains two tyrosine-based inhibition motifs (ITIMs) responsible for binding of SHP-2.                                                |
| Non-catalytic region of tyrosine kinase adaptor protein 1 -- NCK1           | Q99M51   | K.RKPS@VPDTASPADDSFVDPGERLY@DLNM#PAFVK.F<br>K.RKPS@VPDTASPADDSFVDPGERLY@DLNMPAFVK.F<br>K.RKPSVPDTASPADDSFVDPGERLY@DLNMPAFVK.F                                                                                                                                                                                                                                                                                                                                                                                                                       | Y105<br>Y105<br>Y105                                                                                                                                 | Adaptor protein containing SH2 and SH3 domains.                                                                                                                                            |
| PDZ and LIM domain protein 5                                                | Q8CI51   | R.NTEFY@HIPTHSDASK.K                                                                                                                                                                                                                                                                                                                                                                                                                                                                                                                                | Y251                                                                                                                                                 |                                                                                                                                                                                            |
| Phosphatidylinositol 3-kinase regulatory alpha subunit -- p85alpha          | P26450   | K.SREYDRLY@EEYTR.T<br>R.DQY@LMWLTQK.G<br>K.LNEWLGNENTEDQY@SLVEDDEDLPHHDEK.T                                                                                                                                                                                                                                                                                                                                                                                                                                                                         | Y467<br>Y580<br>Y607                                                                                                                                 |                                                                                                                                                                                            |
| Phosphatidylinositol 3-kinase, regulatory subunit, polypeptide 2 -- p85beta | O08908   | R.EYDQLY@EEYTR.T                                                                                                                                                                                                                                                                                                                                                                                                                                                                                                                                    | Y458                                                                                                                                                 |                                                                                                                                                                                            |
| Protein LAP2                                                                | Q80TH2   | R.RTEGDY@LSYR.E<br>R.TEGDY@LSYR.E                                                                                                                                                                                                                                                                                                                                                                                                                                                                                                                   | Y1097<br>Y1097                                                                                                                                       | Acts as an adapter for the receptor ERBB2, in epithelia. Also found to interact with ARVCF and delta catenin. Alternative Name: Erbin.                                                     |
| SH2 domain-containing adapter protein B -- Shb                              | Q6PD21   | C.RLDY@C*GGGGGGDPGGGQRAF.T<br>L.RAMC*RLDY@C*GGGGGGDPGGGQRAF.T<br>M.C*RLDY@C*GGGGGGDPGGGQRAF.T<br>R.LDY@C*GGGGGGDPGGGQRAF.T<br>K.C*SAEETGAGQKDKVTIADY@SDPFDAK.S<br>K.DKVTIADY@SDPFDAK.S<br><br>K.VTIADY@SDPFDAK.S<br>L.LNKC*SAEETGAGQKDKVTIADY@SDPF.D<br>F.DAKSDLKSKAGKGESAGY@M#EPY.E<br>F.DAKSDLKSKAGKGESAGY@MEPY.E<br>K.AGKGESAGY@M#EPYEAQR.I<br>K.AGKGESAGY@MEPYEAQR.I<br><br>K.GESAGY@MEPYEAQR.I<br>K.SKAGKGESAGY@MEPYEAQR.I<br>L.KSKAGKGESAGY@MEPY.E<br>K.LPQDDDRPADEY@DQPWEWNR.V<br>L.RLRESKLPQDDDRPADEY@DQPWE<br>R.ESKLPQDDDRPADEY@DQPWEWNR.V | Y113<br>Y113<br>Y113<br>Y113<br>Y240<br>Y240<br><br>Y240<br>Y240<br>Y262<br>Y262<br>Y262<br>Y262<br><br>Y262<br>Y262<br>Y262<br>Y330<br>Y330<br>Y330 | Adapter protein which regulates several signal transduction cascades by linking activated receptors to downstream signaling components.                                                    |
| SHC transforming protein 1 -- SHC1                                          | P98083   | K.QM#LPPPPC*PGRELFDDPSY@VNIQNLDK.A<br>R.ELFDDPSY@VNIQNLDK.A<br>K.QMLPPPRCPGRELFDDPSY@VNIQNLDK.A<br>R.KQMLPPPRCPGRELFDDPSY@VNIQNLDK.A<br>R.MAGFDGSAWDEEEEEPPDHQY@Y@NDFPGKEP<br>PLGGVDMR.L<br>R.MAGFDGSAWDEEEEEPPDHQY@Y@NDFPGKEP<br>LGGVDMR.L                                                                                                                                                                                                                                                                                                         | Y423<br>Y423<br>Y423<br>Y423<br>Y349, Y350<br>Y350                                                                                                   | Adaptor protein containing a SH2 and PID domain. Couples activated growth factor receptors to a signaling pathways that regulate proliferation.                                            |
| SH2-containing inositol 5-phosphatase 2 -- SHIP2                            | Q9JLL7   | K.NSFNNPAY@YVLEGVPHQLLPLEPPSLAR.A                                                                                                                                                                                                                                                                                                                                                                                                                                                                                                                   | Y987                                                                                                                                                 |                                                                                                                                                                                            |
| Tyrosine-protein phosphatase non-receptor type substrate 1 - SHPS1          | P97797   | Y.ASIETGKVPREDTLTY@ADLDMVHL.S                                                                                                                                                                                                                                                                                                                                                                                                                                                                                                                       | Y481                                                                                                                                                 | Immunoglobulin-like cell surface receptor for CD47. Acts as docking protein and induces translocation of PTPN6, PTPN11 and other binding partners from the cytosol to the plasma membrane. |
| Signal transducer and activator of transcription 3 -- STAT3                 | P42227   | K.YC*RPESQEHPEADPGSAAPY@LK.T                                                                                                                                                                                                                                                                                                                                                                                                                                                                                                                        | Y705                                                                                                                                                 | Transcription factor of the STAT family. Two alternatively spliced isoforms have been described.                                                                                           |
| STAT3 splice isoform Del-701                                                | P42227-3 | K.YC*RPESQEHPEADPGSAAPY@LK.T                                                                                                                                                                                                                                                                                                                                                                                                                                                                                                                        | Y704                                                                                                                                                 | This peptide unique to splice isoform Del-701.                                                                                                                                             |
| Signal transducer and activator of transcription 5B -- STAT5B               | P42232   | K.AADGY@VKPQIK.Q                                                                                                                                                                                                                                                                                                                                                                                                                                                                                                                                    | Y699                                                                                                                                                 |                                                                                                                                                                                            |
| <b>ADHESION: CELL/ECM</b>                                                   |          |                                                                                                                                                                                                                                                                                                                                                                                                                                                                                                                                                     |                                                                                                                                                      |                                                                                                                                                                                            |
| CRK-associated substrate -- p130cas                                         | Q61140   | K.TQQGLY@QAPGNPQFQSPPAK.Q<br>R.VGGYVYEAQTEQDEY@DTPR.H<br><br>Y.VYEAQTEQDEY@DTPRHLL<br><br>R.HLLAPGPQDIY@DVPPVR.G                                                                                                                                                                                                                                                                                                                                                                                                                                    | Y132<br>Y238<br><br>Y238<br><br>Y253                                                                                                                 | Substrate domain YxxP site 2.<br>Substrate domain YxxP site 6.<br><br><br>Substrate domain YxxP site 7.                                                                                    |

|                                                         |        |                                                                                                                                                                                                                 |                                                                    |                                                                                                                                                                                                                                        |
|---------------------------------------------------------|--------|-----------------------------------------------------------------------------------------------------------------------------------------------------------------------------------------------------------------|--------------------------------------------------------------------|----------------------------------------------------------------------------------------------------------------------------------------------------------------------------------------------------------------------------------------|
|                                                         |        | L.LAPGPDQIY@DVPPVRGLLPNQY.G<br>R.GLLPNQYQGEVY@DTPPMVAK.G                                                                                                                                                        | Y253<br>Y271                                                       | Substrate domain YxxP site 8.                                                                                                                                                                                                          |
|                                                         |        | K.GPNGRDPLLDVY@DVPPSVEK.G<br>K.GLLSSSHSVY@DVPPSVSK.D<br>K.DVPDGPLLREETY@DVPPAFAPK.P<br>R.RPGGTLY@DVPR.E<br>R.ERVLPEVADGGSVDDGVY@AVPPPAER.E<br>R.VLPPEVADGGSVDDGVY@AVPPPAER.E<br>L.SRQLQKMEDVY@QTL.V             | Y291<br>Y310<br>Y331<br>Y391<br>Y414<br>Y414<br>Y556               | Substrate domain YxxP site 9.<br>Substrate domain YxxP site 10.<br>Substrate domain YxxP site 11.<br>Substrate domain YxxP site 14.<br>Substrate domain YxxP site 15.<br>Site is C-terminal to the substrate domain.                   |
| Enhancer of filamentation 1 -- HEF1                     | O35177 | R.TGHGYVY@EYPSR.Y<br>K.ANPEERDGVY@DVPLHNPADAK.G                                                                                                                                                                 | Y165<br>Y344                                                       | p130Cas - related protein. Alternative Names: CASL, NEDD9                                                                                                                                                                              |
| Integrin beta-1 precursor                               | P09055 | K.WDTGENPIY@K.S                                                                                                                                                                                                 | Y783                                                               | The first NPXY site in the cytoplasmic tail                                                                                                                                                                                            |
| Lipoma-preferred partner homolog - LPP                  | Q8BFW7 | H.MAGPSSGQIY@GPGPRGY.N<br><br>M.AGPSSGQIY@GPGPRGY.N<br>Y.MAGPSSGQIY@GPGPRGY.N<br><br>R.GYNNQVPVSGQC*PPPPTC*VGTDY@AYIPPSG<br>HPPESGYGTSNQGR.Y<br>R.YYEPY@YAAGPSYGGR.S<br>R.YYEPY@AAGPSYGGR.S                     | Y245<br><br>Y245<br>Y245<br><br>Y276<br>Y301<br>Y302               | A LIM domain-containing that may function in focal adhesions . Interacts with alpha-actinin. J Cell Sci. 116:1359.                                                                                                                     |
| Paxillin                                                | Q8VI36 | F.LSEPPY@SYPTGNHTY.Q<br>L.SEPPY@SYPTGNHTY.Q<br>S.KRPVFLSEPPY@SYPTGNHTY.Q<br>R.YAHQQPPS@PLPVY@SSSAK.N<br>R.YAHQQPPS@PLPVY@SSSAK.N<br>R.YAHQQPPS@PLPVY@SSSAK.N<br>R.AGEEHVY@SFPNK.Q<br><br>R.AGEEHVY@SFPNKQK.S    | Y31<br>Y31<br>Y31<br>Y88<br>Y88<br>Y88<br>Y118<br><br>Y118         |                                                                                                                                                                                                                                        |
| Pleckstrin homology domain containing family C member 1 | Q8CIB5 | L.LIMPSSGSIY@SSPGLY.S                                                                                                                                                                                           | Y179                                                               | Participates in the connection between ECM adhesion sites and the actin cytoskeleton and also in the orchestration of actin assembly and cell shape modulation. Belongs to the kindlin family. Contains 1 FERM domain and 1 PH domain. |
| Syndecan-4 precursor                                    | O35988 | K.KAPTEFY@A.-<br>Y.KKAPTEFY@A.-                                                                                                                                                                                 | Y197<br>Y197                                                       | A heparan sulfate proteoglycan type I membrane protein that promotes cell spreading in a beta(1) integrin-dependent fashion through PKC-alpha and Rho.                                                                                 |
| Talin 1                                                 | P26039 | K.TM#QFEPSTMVY@DAC*R.M<br>K.TMQFEPSTMVY@DAC*R.M<br>M.QFEPSTMVY@DAC*RM.I<br>F.LSDDDPKGIWLEAGKALDY@Y.M<br>K.ALDY@YM#LR.N<br>K.ALDY@YMLR.N<br>W.LEAGKALDY@Y.M<br>R.IGITNHDEY@SLVR.E<br><br>K.LLGEIAQGNENY@AGIAAR.D | Y26<br>Y26<br>Y26<br>Y70<br>Y70<br>Y70<br>Y70<br>Y127<br><br>Y1116 |                                                                                                                                                                                                                                        |
| Tensin                                                  | Q9DBT6 | R.HAAY@GGY@STPEDR.R<br>R.HAAY@GGYSTPEDR.R<br>R.HAAYGGY@STPEDR.R<br>R.HAAYGGY@STPEDRRPT^LSR.Q                                                                                                                    | Y213,Y216<br>Y213<br>Y216<br>Y216                                  | Localizes to focal adhesions. Crosslinks actin filaments and contains SH2 domain.                                                                                                                                                      |
| Tensin 2                                                | Q8CJ95 | H.TRGPLDGSPY@AQVQ.R<br>L.AHTRGPLDGSPY@AQVQ.R<br>R.GPLDGSPY@AQVQ.R.V<br>K.VGEEGHEGC*SY@AVC*SEGR.Y                                                                                                                | Y460<br>Y460<br>Y460<br>Y747                                       |                                                                                                                                                                                                                                        |
| Tensin 3                                                | Q5SSZ5 | L.HTQGPVDGSLY@AKVR.K<br>R.KPSAPTPVQAYGQSNY@STQTWVR.Q                                                                                                                                                            | Y354<br>Y584                                                       |                                                                                                                                                                                                                                        |
| Vinculin                                                | Q64727 | R.ILLRNPNGQAAY@EHFETMK.N<br>K.SFLDSGY@R.I                                                                                                                                                                       | Y691<br>Y821                                                       |                                                                                                                                                                                                                                        |
| <b>ADHESION: CELL/CELL</b>                              |        |                                                                                                                                                                                                                 |                                                                    |                                                                                                                                                                                                                                        |
| Catenin delta-1 -- p120 catenin                         | P30999 | K.LNGPQDHNHLLY@STIPR.M<br><br>R.HYEDGYPGGSDNY@GSLSR.V<br><br>R.HYEDGYPGGSDNY@GS^LSR.V<br><br>R.FHPEPYGLEDDQRSMGY@DDL DY@GMMSDYGT<br>AR.R<br>K.SDNNY@STLNER.G                                                    | Y96<br><br>Y228<br><br>Y228<br><br>Y291,Y296<br>Y877               |                                                                                                                                                                                                                                        |
| Ctnnd1 protein -- p120 catenin, isoform                 | Q80XQ4 | K.SLDNNY@STLNER.G                                                                                                                                                                                               | Y904                                                               | Peptide is unique to this isoform.                                                                                                                                                                                                     |



|                                                                        |        |                                                                                                                                                                                                              |                                                             |                                                                                                                                                                                                                                            |
|------------------------------------------------------------------------|--------|--------------------------------------------------------------------------------------------------------------------------------------------------------------------------------------------------------------|-------------------------------------------------------------|--------------------------------------------------------------------------------------------------------------------------------------------------------------------------------------------------------------------------------------------|
| Discs large homolog 3                                                  | P70175 | R.RDNEVDGQDY@HFVSR.E                                                                                                                                                                                         | Y705                                                        | MAGUK family. Contains 1 guanylate kinase-like domain, 3 PDZ (DHR) domains and 1 SH3 domain.                                                                                                                                               |
| Fath protein [fragment]                                                | Q497H5 | K.NIY@SDIPPQVPRVIPSITYSIPSDSR.N                                                                                                                                                                              | Y952                                                        | Related to Fat cadherins implicated in actin dynamics at both cell-cell contacts and leading edges.                                                                                                                                        |
| Partitioning-defective 3 homolog -- PARD3                              | Q99NH2 | R.ISHSLY@SGIEGLDESPTR.N<br>R.RIS@HSLY@SGIEGLDESPTR.N<br>R.RISHS@LY@SGIEGLDESPTR.N<br>R.RISHSLY@SGIEGLDESPTR.N<br>R.ERDY@AEIQDFHR.T<br>R.EGHLMDTLY@AQVK.K<br>R.KNASSISQDSWEQNY@APGEGFQSAK.E                   | Y719<br>Y719<br>Y719<br>Y1076<br>Y1123<br>Y1238             | Adapter protein involved in asymmetrical cell division and cell polarization processes. Plays a role in the formation of epithelial tight junctions.                                                                                       |
| Plakophilin-4; Armadillo related protein                               | Q68FH0 | R.TVHMDQFGQQYDIY@ER.M<br>L.RSAVSPDLHITPIY@EGRTY.Y<br>R.NNY@ALNTAATY@AEPYRPVQYR.V<br>R.NNYALNTAATY@AEPYRPVQYR.V<br>Y.ALNTAATY@AEPY.R<br>R.SY@EDPYC*DDRVHFPAST@DYSTQYGLK.S<br>R.SY@EDPYC*DDRVHFPASTDYSTQYGLK.S | Y371<br>Y414<br>Y469,Y477<br>Y477<br>Y477<br>Y1137<br>Y1137 | Belongs to the beta-catenin family. May play a role in junctional plaques.                                                                                                                                                                 |
| Scavenger receptor class F member 2 precursor                          | P59222 | R.SASSVEGPGSALY@AR.V                                                                                                                                                                                         | Y615                                                        | Probable adhesion protein, which mediates homophilic and heterophilic interactions.                                                                                                                                                        |
| Tight junction protein ZO-1                                            | P39447 | Y.LSAPGSEY@SMY.S<br>R.HEEQPAPAY@EVHNR.Y                                                                                                                                                                      | Y830<br>Y1164                                               | Belongs to the MAGUK family. Contains 1 guanylate kinase-like domain, 3 PDZ (DHR) domains, 1 SH3 domain.                                                                                                                                   |
| Tight junction protein ZO-2                                            | Q9Z0U1 | R.IEIAQKHPDIY@AVPIK.A                                                                                                                                                                                        | Y1095                                                       |                                                                                                                                                                                                                                            |
| <b>CYTOSKELETON: ACTIN-ASSOCIATED</b>                                  |        |                                                                                                                                                                                                              |                                                             |                                                                                                                                                                                                                                            |
| <b>Actins and actin-related proteins; Regulators of actin assembly</b> |        |                                                                                                                                                                                                              |                                                             |                                                                                                                                                                                                                                            |
| Actin, alpha skeletal muscle (Beta-actin) (Gamma-actin)                | P68134 | K.IWHHTFY@NELR.V<br>M.VMGMGQKDSY@VGDQAQSKRGIL.T                                                                                                                                                              | Y93<br>Y55                                                  | Peptide conserved in alpha cardiac-actin (P68033); ; Beta-actin (P70514); Gamma-actin (P63260)<br>Peptide conserved in alpha-cardiac actin (P68033); gamma-enteric smooth muscle actin (P63268); Beta-actin (P70514); Gamma-actin (P63260) |
| Cofilin-1, non-muscle isoform                                          | P18760 | K.HELQANC*Y@EEVKDR.C<br>K.LTGIKHELQANC*Y@EEVKDR.C<br>L.TGIKHELQANC*Y@EEVKDRC*TLA                                                                                                                             | Y139<br>Y139<br>Y139                                        | This peptide only in Cofilin-1.                                                                                                                                                                                                            |
| Src substrate cortactin                                                | Q60598 | Y.TSEPVY@ETTEAPGHY.Q                                                                                                                                                                                         | Y466                                                        |                                                                                                                                                                                                                                            |
| Vasodilator-stimulated phosphoprotein -- VASP                          | P70460 | F.SRVQIY@HNPTANSF.R<br>R.VQIY@HNPTANSF.R                                                                                                                                                                     | Y39<br>Y39                                                  | Actin- and profilin-binding microfilament-associated protein.                                                                                                                                                                              |
| N-WASP; Neural Wiskott-Aldrich syndrome protein                        | Q91YD9 | K.DRETSKVIY@DFIEK.T<br>K.VIY@DFIEK.T                                                                                                                                                                         | Y253                                                        | Regulates actin polymerization by stimulating the actin-nucleating activity of the Arp2/3 complex.                                                                                                                                         |
| WD-repeat protein 1; Actin interacting protein 1 -- AIP1               | O88342 | K.AHDGGIY@AISWSPDSTHLLSASGDK.T                                                                                                                                                                               | Y237                                                        | Induces disassembly of actin filaments in conjunction with ADF/cofilin family proteins. Contains 11 WD repeats.                                                                                                                            |
| <b>Other actin-associated proteins</b>                                 |        |                                                                                                                                                                                                              |                                                             |                                                                                                                                                                                                                                            |
| Band 4.1-like protein 2                                                | O70318 | N.TLRVDGDNIY@VRHSNL.M<br>R.VDGDNIY@VR.H                                                                                                                                                                      | Y606<br>Y606                                                |                                                                                                                                                                                                                                            |
| Calponin-2                                                             | Q08093 | K.CASQSGMTAY@GT@RR.H                                                                                                                                                                                         | Y184                                                        | Thin filament-associated protein implicated in regulation of smooth muscle contraction. Capable of binding to actin, calmodulin, troponin C and tropomyosin.                                                                               |
| Calponin-3                                                             | Q9DAW9 | Y.HGEYPPDY@PREY.Q                                                                                                                                                                                            | Y316                                                        |                                                                                                                                                                                                                                            |
| LIM and SH3 domain protein 1 -- LASP-1                                 | Q61792 | H.HIPTSAPVY@QQPQQQM.T                                                                                                                                                                                        | Y173                                                        | Characterized by a LIM motif and SH3 domain. Functions as an actin-binding protein, possibly in cytoskeletal organization.                                                                                                                 |
| Septin-2                                                               | P42208 | K.QQPTQFINPETPGY@VGFANLPNQVHR.K<br>K.QQPTQFINPETPGY@VGFANLPNQVHRK.S                                                                                                                                          | Y17<br>Y17                                                  | Involved in cytokinesis. Alternative Name: NEDD-5.                                                                                                                                                                                         |
| Sickle tail-b (Sickle tail-a)                                          | Q75UV8 | R.NVY@YELNDVR.N<br>R.NEGFY@ADPYLYHEGR.M                                                                                                                                                                      | Y244<br>Y393                                                | Both peptides identical in Sickle tail-a isoform (Q75UV9). Related to p130Cas-binding protein (p140Cap).                                                                                                                                   |
| <b>CYTOSKELETON: MICROTUBULE-ASSOCIATED</b>                            |        |                                                                                                                                                                                                              |                                                             |                                                                                                                                                                                                                                            |
| none                                                                   |        |                                                                                                                                                                                                              |                                                             |                                                                                                                                                                                                                                            |
| <b>CYTOSKELETON: OTHER</b>                                             |        |                                                                                                                                                                                                              |                                                             |                                                                                                                                                                                                                                            |
| Vimentin                                                               | P20152 | R.FANY@IDKVR.F                                                                                                                                                                                               | Y116                                                        | Vimentins are class-III intermediate filaments found in various non-epithelial cells, especially mesenchymal cells.                                                                                                                        |

R.SLY@SSSPGGAYVTR.S

Y52

**TRAFFICKING/TRANSPORT****Vesicle transport**

|                                               |        |                                              |              |                                                                                                                                                                                                  |
|-----------------------------------------------|--------|----------------------------------------------|--------------|--------------------------------------------------------------------------------------------------------------------------------------------------------------------------------------------------|
| Double C2-like domain containing protein beta | P70169 | K.TY@LKPVDVKKSK.H<br>K.TY@LKPVDVKKS*K.H      | Y309<br>Y309 | May be involved in constitutive membrane trafficking including dynein-dependent intracellular vesicle transport. Binds calcium and phospholipids. Interacts with cytoplasmic dynein light chain. |
| Intersectin 2                                 | Q920R6 | R.GEPEALY@AAVTK.K                            | Y 921        | Adapter protein that may provide indirect link between the endocytic membrane traffic and the actin assembly machinery. May regulate the formation of clathrin-coated vesicles.                  |
| Low-density lipoprotein receptor precursor    | P35951 | F.DNPVY@QKTTEDELHIC*RSQDGY.T                 | Y832         | Binds LDL, the major cholesterol-carrying lipoprotein of plasma, and transports it into cells by endocytosis.                                                                                    |
| Nucleoporin-like protein RIP                  | Q8K2K6 | K.AGLQTADKY@AALANLDNIFSAGQGGDQSGFG<br>TTGK.A | Y327         | Required for vesicle docking or fusion during axosome biogenesis. May play a role in RNA trafficking or localization.                                                                            |
| Transferrin receptor protein 1 - TFR          | Q62351 | F.SNLFGGELSY@TRF.S<br>R.SAFSNLFGGELSY@TR.F   | Y20<br>Y20   | Regulates the cellular uptake of iron via receptor-mediated endocytosis of ligand-occupied receptors into specialized endosomes.                                                                 |

**Nucleocytoplasmic transport**

None

**Other transport**

|                                                        |        |                                                                               |                   |                                                                                                                                                              |
|--------------------------------------------------------|--------|-------------------------------------------------------------------------------|-------------------|--------------------------------------------------------------------------------------------------------------------------------------------------------------|
| Gap junction alpha-1 protein -- Connexin 43            | P23242 | K.QASEQNWANY@SAEQNR.M                                                         | Y312              | Hexamers of connexin-43 form connexons, which aggregate together to form gap junctions, through which materials of low MW diffuse between cells.             |
| Lysosomal-associated transmembrane protein 4A          | Q60961 | K.IPEKEPPPY@LPA.-                                                             | Y230              | May function in the transport of nucleosides and/or nucleoside derivatives between the cytosol and the lumen of an intracellular membrane-bound compartment. |
| Sodium bicarbonate cotransporter 2B homolog [fragment] | Q8BTY2 | K.DKSDKEDGRES@PSY@DTPSQR.V<br>K.DKDS*DKEDGRES@DTPSQR.V                        | Y92<br>Y92        |                                                                                                                                                              |
| Solute carrier family 38, member 2                     | Q8CFE6 | K.SHY@ADVDPENQNFLESNLGK.K<br>K.SHY@ADVDPENQNFLESNLGKK.K<br>L.KSHY@ADVDPENQNFL | Y41<br>Y41<br>Y41 |                                                                                                                                                              |

**METABOLIC AND BIOSYNTHETIC ENZYMES****Glycolytic enzymes**

|                                                   |        |                                               |            |                                                                                                                                                                                                                                                                                                                         |
|---------------------------------------------------|--------|-----------------------------------------------|------------|-------------------------------------------------------------------------------------------------------------------------------------------------------------------------------------------------------------------------------------------------------------------------------------------------------------------------|
| Alpha enolase (beta-enolase) (gamma enolase)      | P17182 | R.GNPTVEVDLY@TAK.G<br>R.AAVPSGASTGIY@EALELR.D | Y24<br>Y43 | Catalyzes the first common step of glycolysis and gluconeogenesis. Mammalian enolase is composed of 3 isozyme subunits, alpha, beta and gamma, which can form homodimers or heterodimers. This peptide also identical in gamma enolase (P17183).<br>Identical peptide in beta enolase (P21550); gamma enolase (P17183). |
| Glyceraldehyde-3-phosphate dehydrogenase -- GAPDH | P16858 | K.LISWYDNEY@GYSNR.V                           | Y315       | Second phase of glycolysis; first step.                                                                                                                                                                                                                                                                                 |
| Phosphoglycerate mutase 1                         | Q9DBJ1 | R.FSGWY@DADLSPAGHEEAKR.G                      | Y25        | Functions in second phase of glycolysis.                                                                                                                                                                                                                                                                                |
| Pyruvate kinase, isozyme M2                       | P52480 | R.EAEAIY@HLQLFEELRR.L                         | Y389       | Second phase of aerobic glycolysis; final step.                                                                                                                                                                                                                                                                         |

**Other metabolic/biosynthetic enzymes**

|                                               |        |                           |      |                                                                                                                          |
|-----------------------------------------------|--------|---------------------------|------|--------------------------------------------------------------------------------------------------------------------------|
| Bifunctional purine biosynthesis protein PURH | Q9CWJ9 | R.VC*MVY@DLYPTLPLAVAYAR.A | Y290 | Involved in de novo purine biosynthesis.                                                                                 |
| Serine hydroxymethyltransferase, cytosolic    | P50431 | K.MLSQPKDSDAEVY@SIKK.E    | Y28  | Interconversion of serine and glycine. Key enzyme in the biosynthesis of purines, lipids, hormones and other components. |
| TK: Transketolase                             | P40142 | K.NMAEQIIQEIY@SQVQSK.K    | Y275 | Pentose phosphate pathway; non-oxidative stage.                                                                          |

**RNA SYNTHESIS AND PROCESSING****Transcription machinery and regulation**

|                                            |        |                                                                                                            |                                      |                                                                                                                                                                |
|--------------------------------------------|--------|------------------------------------------------------------------------------------------------------------|--------------------------------------|----------------------------------------------------------------------------------------------------------------------------------------------------------------|
| Polymerase I and transcript release factor | O54724 | F.KVMIIY@QDEVKLPKAL.S<br>K.VMIY@QDEVKLPKAL.L<br>F.TPDHVY@ARSKTAVY.K<br>K.SFTPDHVY@AR.S<br>R.KSFTPDHVY@AR.S | Y158<br>Y158<br>Y310<br>Y310<br>Y310 | Required for dissociation of the ternary transcription complex. Also found at the cell membrane and the surface of caveolae, suggesting alternative functions. |
|--------------------------------------------|--------|------------------------------------------------------------------------------------------------------------|--------------------------------------|----------------------------------------------------------------------------------------------------------------------------------------------------------------|

**DEAD(DEAH)-box helicases**

|                                  |        |                                         |              |                                      |
|----------------------------------|--------|-----------------------------------------|--------------|--------------------------------------|
| ATP-dependent RNA helicase DDX3X | Q62167 | R.GRGDY@DGIGGR.G<br>R.GRGDY@DGIGGRGDR.S | Y103<br>Y103 | Putative ATP-dependent RNA helicase. |
|----------------------------------|--------|-----------------------------------------|--------------|--------------------------------------|

**hnRNPs and snRNPs**

none

**Splicing factors**

|                                                                                                                                 |        |                                                                                   |                              |                                                                                                                                                                                                                                          |
|---------------------------------------------------------------------------------------------------------------------------------|--------|-----------------------------------------------------------------------------------|------------------------------|------------------------------------------------------------------------------------------------------------------------------------------------------------------------------------------------------------------------------------------|
| none                                                                                                                            |        |                                                                                   |                              |                                                                                                                                                                                                                                          |
| <b>Other RNA binding and processing</b>                                                                                         |        |                                                                                   |                              |                                                                                                                                                                                                                                          |
| Poly(rC)-binding protein 2                                                                                                      | Q61990 | Y.TIQGQY@AIPQPDCLKHLQAM.Q                                                         | Y232                         | Single-stranded nucleic acid binding protein that binds preferentially to oligo dC. RNA binding protein.                                                                                                                                 |
| Putative RNA-binding protein 3                                                                                                  | O89086 | R.YDSRPGGYGY@GYGR.S<br>Y.DSRPGGYGY@GY.G<br>R.YDSRPGGYGY@GR.S<br>R.YSGGNYRDNY@DN.- | Y124<br>Y124<br>Y126<br>Y151 |                                                                                                                                                                                                                                          |
| RNA-binding protein 14                                                                                                          | Q8C2Q3 | R.LPDAHSDY@AR.Y                                                                   | Y645                         |                                                                                                                                                                                                                                          |
| <b>PROTEIN SYNTHESIS AND PROCESSING</b>                                                                                         |        |                                                                                   |                              |                                                                                                                                                                                                                                          |
| <b>tRNA synthetases</b>                                                                                                         |        |                                                                                   |                              |                                                                                                                                                                                                                                          |
| None                                                                                                                            |        |                                                                                   |                              |                                                                                                                                                                                                                                          |
| <b>Translation machinery</b>                                                                                                    |        |                                                                                   |                              |                                                                                                                                                                                                                                          |
| 40S ribosomal protein S10                                                                                                       | P63325 | R.IAIY@ELLFK.E                                                                    | Y12                          |                                                                                                                                                                                                                                          |
| 60S acidic ribosomal protein P0                                                                                                 | P14869 | K.IIQLDDY@PK.C                                                                    | Y24                          |                                                                                                                                                                                                                                          |
| 67 kDa polymerase-associated factor PAF67; Eukaryotic translation initiation factor 3 subunit 6-interacting protein -- Eif3s6ip | Q91YE4 | K.GDPQVYEELFSY@AC*PK.F                                                            | Y415                         | Associated with the initiation-competent form of RNA polymerase I. The association of PAF67 with the 'core' enzyme endows Pol I with the capability to assemble into a productive transcription initiation complex at the rDNA promoter. |
| Eukaryotic initiation factor 4A-I                                                                                               | P60843 | R.GFKDQIY@DIFQK.L                                                                 | Y197                         |                                                                                                                                                                                                                                          |
| Elongation factor 1-alpha 1 -- eEF1A-1 (eEF1A-2)                                                                                | P10126 | K.STTTGHLIY@K.C<br>R.EHALLAY@TLGVK.Q                                              | Y29<br>Y141                  | Promotes the GTP-dependent binding of aminoacyl-tRNA to the A-site of ribosomes during protein biosynthesis. Both peptides identical in eEF1A-2 (P62631; P27706).                                                                        |
| Laminin receptor 1 (ribosomal protein SA)                                                                                       | Q8BNL2 | R.ADHQPLTEASY@VNLPTIALC*NTDSPLR.Y                                                 | Y139                         | Belongs to the ribosomal protein S2P family. GO:0005719,C:nuclear euchromatin,IDA. Protein Type: Receptor, misc., Adhesion                                                                                                               |
| G1 to phase transition 2 -- GSPT2                                                                                               | Q9CY91 | K.Y@LIVLINK.M                                                                     | Y347                         | GSPT2 is closely related to GSPT1. GSPT1 is a positive regulator of translational accuracy and, in a binary complex with eRF1 functions as a polypeptide chain release factor.                                                           |
| <b>Post-translational modifiers</b>                                                                                             |        |                                                                                   |                              |                                                                                                                                                                                                                                          |
| Probable palmitoyltransferase ZDHC5                                                                                             | Q8VDZ4 | R.EPS@PVRY@DNLSR.H<br>R.LLPTGPPHREPS@PVRY@DNLSR.H                                 | Y533<br>Y533                 | Peptide identical in ZDHC8 (Q5Y5T5)                                                                                                                                                                                                      |
| Probable palmitoyltransferase ZDHC8                                                                                             | Q5Y5T5 | F.SPVLGPRPREPS*PVRY@DNLS<br>R.PREPS*PVRY@DNLSR.T<br>L.RSQDLSLFGDSGVY@DTPSSY.S     | Y538<br>Y538<br>Y576         | Putative palmitoyltransferase involved in glutamatergic transmission.                                                                                                                                                                    |
| <b>Chaperones and associated proteins</b>                                                                                       |        |                                                                                   |                              |                                                                                                                                                                                                                                          |
| BAG-family molecular chaperone regulator-3                                                                                      | Q9JLV1 | K.THYPAAQQGEY@QPQQPVYHK.I                                                         | Y246                         | Inhibits the chaperone activity of HSP70/HSC70 by promoting substrate release.                                                                                                                                                           |
| Heat shock 70 kDa protein 4                                                                                                     | Q61316 | K.LKKEDIY@AVEIVGGATR.I                                                            | Y336                         |                                                                                                                                                                                                                                          |
| Heat shock protein HSP 90-beta                                                                                                  | P11499 | K.SIY@YITGESK.E                                                                   | Y483                         |                                                                                                                                                                                                                                          |
| <b>PROTEIN DEGRADATION</b>                                                                                                      |        |                                                                                   |                              |                                                                                                                                                                                                                                          |
| <b>Ubiquitin conjugation regulators</b>                                                                                         |        |                                                                                   |                              |                                                                                                                                                                                                                                          |
| E3 ubiquitin protein ligase CBL                                                                                                 | P22682 | K.IKPSSSANAIY@SLAARPLMPK.L                                                        | Y672                         | Acts as an E3 ubiquitin-protein ligase.                                                                                                                                                                                                  |
| E3 ubiquitin-protein ligase CBL-B                                                                                               | Q3TTA7 | R.ASQDY@DQLPSSSDGSOAPARPPKPR.P                                                    | Y889                         |                                                                                                                                                                                                                                          |
| Probable E3 ubiquitin-protein ligase MGRN1                                                                                      | Q9D074 | L.RAVSPAIPSAPLY@EEITY.S                                                           | Y389                         | Mahogunin ring finger protein 1                                                                                                                                                                                                          |
| <b>Proteasome components</b>                                                                                                    |        |                                                                                   |                              |                                                                                                                                                                                                                                          |
| Proteasome subunit alpha type 2 -- PSMA2                                                                                        | P49722 | K.HIGLVY@SGMGPDYR.V                                                               | Y75                          | Proteasome component C3. PSMA2 may have a potential regulatory effect on another component(s) of the proteasome complex through its tyrosine phosphorylation.                                                                            |
| <b>Other proteases and endopeptidases</b>                                                                                       |        |                                                                                   |                              |                                                                                                                                                                                                                                          |
| ADAM 9 precursor                                                                                                                | Q61072 | K.ISSQGNLIPARPAPPLY@SSLT.-<br>N.LIPARPAPPLY@SSLT.-                                | Y841<br>Y841                 | A disintegrin and metalloproteinase domain 9                                                                                                                                                                                             |
| Prolyl endopeptidase                                                                                                            | Q9QUR6 | R.MTELY@DYPK.Y                                                                    | Y71                          | Peptidase S9A family. Cleaves peptide bonds on the C-terminal side of prolyl residues within peptides that are up to ~30 amino acids long.                                                                                               |

| NUCLEAR PROTEINS                                                                                                               |                   |                                                                                        |                      |                                                                                                |
|--------------------------------------------------------------------------------------------------------------------------------|-------------------|----------------------------------------------------------------------------------------|----------------------|------------------------------------------------------------------------------------------------|
| Histone H2B type 1-B                                                                                                           | Q64475            | R.KESYSVY@VYK.V                                                                        | Y41                  |                                                                                                |
| MISCELLANEOUS                                                                                                                  |                   |                                                                                        |                      |                                                                                                |
| Microfibril-associated glycoprotein 3 precursor                                                                                | Q922T2            | R.IKERPALDAQSGIY@VINPELGR.S                                                            | Y277                 | Microfibril-associated glycoprotein 3. Protein Type: Extracellular matrix                      |
| Psychosine receptor                                                                                                            | Q61038            | R.Y@LAVVYPLK.F                                                                         | Y115                 | Receptor for the glycosphingolipid psychosine (PSY) and several related glycosphingolipids.    |
| FUNCTION UNKNOWN OR UNCERTAIN                                                                                                  |                   |                                                                                        |                      |                                                                                                |
| Named proteins of unknown/uncertain function                                                                                   |                   |                                                                                        |                      |                                                                                                |
| Carnitine deficiency-associated protein CDV3A (CDV3B)                                                                          | Q920I4            | R.KTPQGPEIY@SDTQFPSLQSTAK.H                                                            | Y213                 | Peptide identical in Carnitine deficiency-associated protein CDV3B (Q920C7)                    |
| Brain-specific angiogenesis inhibitor 1-associated protein 2-like protein 1                                                    | Q9DBJ3            | K.MIGKDY@DTLSK.Y<br>M.IGKDY@DTLSKY.S                                                   | Y274<br>Y274         | May function as adapter protein. Contains 1 IMD (IRSp53/MIM homology) domain and 1 SH3 domain. |
| Suppression of tumorigenicity 5                                                                                                | Q924W7            | K.STLEENAYEDIVGGLPKENPY@EDVDLK.N                                                       | Y498                 |                                                                                                |
| Pituitary tumor-transforming gene 1 protein-interacting protein precursor                                                      | Q8R143            | F.KEQNPY@EKF.-<br>K.EQNPY@EKF.-                                                        | Y171<br>Y171         | May facilitate PTTG1 nuclear translocation.                                                    |
| WW domain binding protein 4                                                                                                    | Q3TWW5            | K.FGDY@C*K.C<br>K.S*QPKKFGDY@C*K.C                                                     | Y15<br>Y15           |                                                                                                |
| Unnamed proteins of unknown/uncertain function                                                                                 |                   |                                                                                        |                      |                                                                                                |
| hypothetical protein -- Cdc105                                                                                                 | Q9D4K7            | K.FNQEM#Y@VTRGIK.G                                                                     | Y372                 | Coiled-coil domain containing 105                                                              |
| hypothetical HAT dimerisation/BED finger/Bipartite nuclear localization signal/Zinc finger BED-type profile containing protein | Q3UMD3            | W.HFFHVDPQY@TW.R                                                                       | Y145                 |                                                                                                |
| hypothetical Intradiol ring-cleavage dioxygenase/WD40-like containing protein                                                  | Q3UHA3            | R.YNEMTY@IFDLLHQK.H                                                                    | Y2161                |                                                                                                |
| MKIAA1686 protein [fragment]                                                                                                   | Q6ZPK1            | K.ERPISMINEASNY@NMASDY@AVHPMSPVGR.T                                                    | Y65,Y71              | Contains 1 PH domain.                                                                          |
| PREDICTED: similar to Oligophrenin 1                                                                                           | UPI0000512<br>5B7 | K.LWLEAMDGKEPIY@TLPAlSK.K<br>R.KLWLEAM#DGKEPIY@TLPAlSK.K<br>R.KLWLEAMDGKEPIY@TLPAlSK.K | Y371<br>Y371<br>Y371 |                                                                                                |
| PREDICTED: similar to zinc finger CCCH type containing 11A isoform 1                                                           | UPI00001C4<br>84B | R.IPFS@KTY@SKTEK.V                                                                     | Y399                 |                                                                                                |
| Protein KIAA1914                                                                                                               | Q5DTU0            | K.VAQQLSLVGC*DVLDPDPSDHL@SFR.I                                                         | Y413                 | Contains 2 PH domains.                                                                         |
| Similar to RIKEN cDNA 4930527D15 gene [fragment]                                                                               | Q922B5            | K.EKLLLC*HGPS@LSPALSGVRY@NAEK.K                                                        | Y39                  |                                                                                                |

**END**

**Footnotes:**

**a** The protein name is typically taken from the UniProt entry. Additional proteins (in parentheses) indicates ambiguity due to peptides being found in multiple related proteins. If a peptide is not unambiguously identified, additional relevant information is given in the Comments column. The UniProt ID #, indicates the UniProt Knowledgebase ID number representing the latest annotation update for the protein at the time of analysis.

**b** Peptides are shown in single letter amino acid code, with periods indicating cleavage sites. Y@, phosphotyrosine; S@, phosphoserine; T@, phosphothreonine; S<sup>+</sup> and T<sup>+</sup>, phosphoserine and phosphothreonine detected through neutral loss of phosphoric acid; C\*, carboxymethylated cysteine; M#, oxidated methionine. In the pY site column, the position of the phosphotyrosine site is based on the sequence of the given UniProt entry.

**c** The Novel column indicates whether or not the phosphotyrosine site has been previously recognized in either UniProt or PhosphoSite entries. N with an asterisk indicates that the site is represented in PhosphoSite as an unpublished site.

**d** The Com/Uncom column indicates whether the site was also found in the other cell population analyzed in this study.

**e** The "Rounds found" column indicates which of the 18 independent rounds of analysis the peptide was identified. Rounds 1-5, trypsin cleavage with affinity purification using antibody pY100. 6-10, trypsin cleavage with affinity purification using antibody 4G10. 11-14, chymotrypsin cleavage with affinity purification using pY100. 15-18, chymotrypsin cleavage with affinity purification using 4G10.

**f** "Total IDs" indicates number of independent spectra (combined from the indicated rounds) for which the indicated peptide was top-scoring. "Site count" indicates total number of times the indicated site was identified from all peptides.

**g** Cross-correlation score (xcorr) and charge (z) of the peptide. For peptides identified multiple times, the highest xcorr value is listed.

**h** Experimental mass of a singly charged peptide (MH) and the difference of the experimental from the calculated mass (dM), for the peptide with the highest xcorr value.

**i** If the delta correlation (dCn) score for the second-ranking peptide is < 0.2, these are shown.

**j** Short notes of interest.
