# Supplementary material
Source: PubMed Central journal article supplement (PMC2579752)
Supplement: NIHMS60500-supplement-Table_S2.pdf [file NIHMS60500-supplement-Table_S2.pdf]

**Table S2. Phosphotyrosine sites from the Src-transformed mouse embryo fibroblast population**

| Protein Name(s) <sup>a</sup>                                                    | UniProt # <sup>a</sup> | Peptide <sup>b</sup>                                                                                       | pY site(s) <sup>b</sup>                        | Novel <sup>c</sup><br>Yes/No | Com or<br>Uncom <sup>d</sup> | Rounds found <sup>e</sup>                                                                    | Total<br>IDs <sup>f</sup>   | Site<br>count <sup>f</sup> | XCorr <sup>g</sup>                           | Z <sup>g</sup>             |
|---------------------------------------------------------------------------------|------------------------|------------------------------------------------------------------------------------------------------------|------------------------------------------------|------------------------------|------------------------------|----------------------------------------------------------------------------------------------|-----------------------------|----------------------------|----------------------------------------------|----------------------------|
| <b>SIGNALING: PROTEIN KINASES AND PHOSPHATASES</b>                              |                        |                                                                                                            |                                                |                              |                              |                                                                                              |                             |                            |                                              |                            |
| <b>Tyrosine kinases (nonreceptor)</b>                                           |                        |                                                                                                            |                                                |                              |                              |                                                                                              |                             |                            |                                              |                            |
| Rous sarcoma oncogene, isoform 2 -- Src (Yes) (Fyn)                             | Q80XU2                 | F.VALY@DYESRTETDLS<br>F.VALY@DYESRTETDLSFK<br>R.AGPLAGGVTTFFVALY@DYESR.T<br>R.TQFNLSLQQLVAY@YSK.H          | Y92<br>Y92<br>Y92<br>Y231                      | Y<br>Y<br>Y<br>Y             | U<br>U<br>U<br>U             | 11,12,13,14,16,17,18<br>11<br>1,3,4,5,8,9<br>1,7                                             | 8<br>11<br>18<br>2          | 37<br>2                    | 4.12<br>4.23<br>5.88<br>4.37                 | 2<br>2<br>2<br>2           |
|                                                                                 |                        | L.IEDNEY@TARQGAKFPIKW.T<br>R.LIEDNEY@TAR.Q<br>K.FPIKWTAPEAALY@GR.F<br>K.WTAPEAALY@GR.F<br>W.TAPEAALY@GRF.T | Y418<br>Y418<br>Y438<br>Y438<br>Y438           | N<br>N<br>Y<br>Y<br>Y        | C<br>C<br>U<br>U<br>U        | 11,12,14,15,16,17,18<br>1,2,3,4,5,6,7,8,9,10<br>1,2,3,9<br>1,2,3,4,5,6,7,9,10<br>11,12,14,16 | 7<br>20<br>4<br>3<br>9<br>5 | 27<br>21                   | 4.68<br>3.58<br>4.43<br>4.19<br>2.72<br>3.01 | 3<br>2<br>3<br>2<br>2<br>2 |
| Proto-oncogene tyrosine-protein kinase LCK                                      | P06240                 | F.GLARLIEDNEY@TAREGAKFPIKW.T<br>F.GLARLIEDNEY@TAREGAKFP<br>R.LIEDNEY@TAREGAKFPIKW.T                        | Y393<br>Y393<br>Y393                           | N<br>N<br>N                  | U<br>U<br>U                  | 12<br>14<br>11,17                                                                            | 1<br>1<br>2                 | 4                          | 2.79<br>3.36<br>4.15                         | 3<br>3<br>3                |
| Tyrosine-protein kinase CSK                                                     | P41241                 | L.IKPKVMEGTVAQAQDEFY@RSGWA                                                                                 | Y184                                           | N                            | U                            | 12                                                                                           | 1                           | 1                          | 4.02                                         | 3                          |
| Fer                                                                             | P70451                 | K.VQENDGKPPVNY@EEDAR.S<br>F.GMSRQEDGGVY@SSSGL.K                                                            | Y402<br>Y715                                   | N*<br>N                      | C<br>C                       | 2<br>11                                                                                      | 1<br>1                      | 1                          | 4.58<br>3.44                                 | 3<br>2                     |
| Proto-oncogene tyrosine-protein kinase ABL1                                     | P00520                 | R.LMTGDTY@TAHAGAK.F                                                                                        | Y393                                           | N                            | C                            | 1,2,3                                                                                        | 3                           | 3                          | 3.56                                         | 2                          |
| Focal adhesion kinase, isoform 3 -- FAK                                         | P34152-3               | R.YM#EDSTY@YK.A<br>R.YMEDSTY@YK.A<br>R.YMEDSTY@YKASK.G<br>R.YMEDSTY@Y@K.A<br>R.YMEDSTY@Y@KASK.G            | Y576<br>Y576<br>Y576<br>Y576,Y577<br>Y576,Y577 | N<br>N<br>N<br>N<br>N        | C<br>C<br>C<br>C<br>C        | 3,8<br>2,5,6,7,8,9,10<br>2,3<br>9,10<br>9,10                                                 | 2<br>9<br>2<br>2<br>2       | 17<br>4                    | 3.02<br>3.11<br>3.96<br>2.79<br>3.72         | 2<br>2<br>2<br>2<br>2      |
| <b>Tyrosine kinases (receptor)</b>                                              |                        |                                                                                                            |                                                |                              |                              |                                                                                              |                             |                            |                                              |                            |
| Discoidin domain receptor 2 precursor -- DDR2                                   | Q62371                 | F.GMSRNLY@SGDY@YR.<br>R.NLY@S@GDY@YR.I<br>R.NLY@SGDY@YR.I                                                  | Y735,Y739<br>Y735<br>Y735,Y739                 | N<br>N<br>N                  | C<br>C<br>C                  | 11,12<br>2<br>4,9                                                                            | 2<br>1<br>2                 | 4<br>5                     | 3.65<br>1.85<br>2.30                         | 2<br>2<br>2                |
| Ephrin type-A receptor 2 precursor                                              | Q03145                 | K.SEQLKPLKT@YVDPHTY@EDPNQAVLK.F<br>F.GLSRVLEDDPEATY@TTSGGKIPRW.T                                           | Y595<br>Y773                                   | N<br>N                       | C<br>C                       | 1<br>12                                                                                      | 1<br>1                      | 1<br>1                     | 3.36<br>3.31                                 | 3<br>3                     |
| Eph receptor B4                                                                 | Q91YM0                 | Y.LIGHGKTVY@IDPFY@EDPNEAVREF.A                                                                             | Y590,Y596                                      | N,N                          | C,C                          | 12                                                                                           | 1                           | 1,1                        | 4.75                                         | 3                          |
| Tyrosine-protein kinase receptor UFO precursor -- Axl                           | Q00993                 | K.IYNGDY@YR.Q<br>K.KIYNGDY@YR.Q                                                                            | Y696<br>Y696                                   | N*<br>N                      | C<br>C                       | 9<br>2,3                                                                                     | 1<br>2                      | 3                          | 2.43<br>2.73                                 | 2<br>2                     |
| <b>Other protein kinases</b>                                                    |                        |                                                                                                            |                                                |                              |                              |                                                                                              |                             |                            |                                              |                            |
| Akt1: RAC-alpha serine/threonine-protein kinase (Akt-2) (Akt-3)                 | P31750                 | K.TFC*GTPEYLAPEVLEDNDY@GR.A                                                                                | Y326                                           | N                            | U                            | 6                                                                                            | 1                           | 1                          | 4.24                                         | 3                          |
| Akt-3: RAC-gamma serine/threonine-protein kinase                                | Q9WUA6                 | K.Y@Y@AM#KILKKEVIAK.D                                                                                      | Y173,Y174                                      | N*,N*                        | U,U                          | 7                                                                                            | 1                           | 1,1                        | 2.99                                         | 2                          |
| Calcium/calmodulin-dependent protein kinase type 1 --CaM kinase I               | Q91YS8                 | R.DLKPENLLYY@SLDEDSK.I                                                                                     | Y150                                           | Y                            | U                            | 2                                                                                            | 1<br>1                      | 2                          | 4.19<br>3.69                                 | 3<br>2                     |
| Casein kinase I isoform alpha                                                   | Q8BK63                 | R.TLNHQDY@TFDWTMLK.Q                                                                                       | Y294                                           | N*                           | U                            | 1,9                                                                                          | 1<br>1                      | 2                          | 3.71<br>4.35                                 | 2<br>3                     |
| Casein kinase II, alpha chain                                                   | Q60737                 | K.VLGTEDLY@DYIDKYNIELDPR.F                                                                                 | Y255                                           | N                            | U                            | 8                                                                                            | 1                           | 1                          | 3.60                                         | 3                          |
| CDC2: Cell division control protein 2 homolog - CDK1 (CDK2)                     | P11440                 | K.IGEGTY@GVVYK.G<br>K.IGEGT*Y@GVVYK.G<br>K.IGEGTYGVVY@K.G<br>K.IGEGTYGVVY@KGR.H                            | Y15<br>Y15<br>Y19<br>Y19                       | N<br>N<br>N<br>N             | C<br>C<br>C<br>C             | 1,2,3,4,7,8,9,10<br>7<br>4<br>2                                                              | 8<br>1<br>1<br>1            | 9<br>2                     | 3.15<br>2.33<br>2.39<br>2.28                 | 2<br>2<br>2<br>2           |
| Dual-specificity tyrosine-phosphorylation regulated kinase 1A --DYRK1A (DYRK1B) | Q61214                 | K.HINEVY@YAK.K<br>K.VYNDGYDDNY@DYIVK.N<br>R.KVYNDGYDDNY@DYIVK.N                                            | Y111<br>Y145<br>Y145                           | N*<br>N<br>N                 | U<br>C<br>C                  | 1,2,3<br>7<br>6,7,8,10                                                                       | 3<br>1<br>4                 | 3<br>7                     | 2.58<br>4.47<br>5.48                         | 2<br>2<br>2                |

|                                                                                                     |        |                                                                                                                                                                                                                                                                                                                 |                                                             |         |        |                                                                                                  |                                            |                                                                            |                                                |
|-----------------------------------------------------------------------------------------------------|--------|-----------------------------------------------------------------------------------------------------------------------------------------------------------------------------------------------------------------------------------------------------------------------------------------------------------------|-------------------------------------------------------------|---------|--------|--------------------------------------------------------------------------------------------------|--------------------------------------------|----------------------------------------------------------------------------|------------------------------------------------|
|                                                                                                     |        | Y.NDGYDDDN@DYIVKNGEKW.M<br>R.IYQY@IQSR.F                                                                                                                                                                                                                                                                        | Y145<br>Y321                                                | N       | C      | 15,16<br>1                                                                                       | 2<br>1                                     | 4.49<br>2.17                                                               | 3<br>2                                         |
| Glycogen synthase kinase-3 beta -- GSK-3 beta (GSK-3 alpha)                                         | Q9WV60 | L.VRGEPNVSY@IC*SR.Y<br>L.VRGEPNVSY@IC*SR.Y.R<br>R.GEPNVSY@IC*SR.Y                                                                                                                                                                                                                                               | Y216<br>Y216<br>Y216                                        | N       | C      | 17<br>11,12<br>3,8                                                                               | 1<br>1<br>1<br>2                           | 3.56<br>3.53<br>3.96<br>3.32                                               | 3<br>3<br>2<br>2                               |
| RIKEN CDNA C230081A13: hypothetical Protein kinase A anchoring domain containing protein -- SgK269  | Q8BX56 | K.NAIKVPVIVNPAY@DNLAII@K.S<br>K.VPIVINPNAY@DNLAII@K.S<br>K.VPIVINPNAY@DNLAII@K.S<br>N.AIKVPVIVNPAY@DNLAII@KSFL                                                                                                                                                                                                  | Y632,Y638<br>Y632,Y638<br>Y638<br>Y632,Y638                 | N       | C      | 1,2,3,4,5,7,8<br>2,5<br>2<br>11,14,17                                                            | 7<br>1<br>2<br>1<br>3                      | 5.43<br>4.67<br>2.76<br>1.97<br>5.35                                       | 3<br>2<br>2<br>2<br>3                          |
| Serine/threonine-protein kinase Nek9                                                                | Q8K1R7 | R.NKEVYSWGC*GEY@GR.L                                                                                                                                                                                                                                                                                            | Y509                                                        | Y       | U      | 2,4                                                                                              | 1<br>2                                     | 3.43<br>5.16                                                               | 2<br>3                                         |
| Serine/threonine-protein kinase PRP4 homolog                                                        | Q61136 | K.LC*DFGSASHVADNDITPY@LVSR.F<br>H.VADNDITPY@LVSR.F.Y                                                                                                                                                                                                                                                            | Y849<br>Y849                                                | N       | C      | 1,2,3,6,9<br>14                                                                                  | 5<br>1                                     | 5.91<br>3.10                                                               | 3<br>2                                         |
| <b>Protein phosphatases</b>                                                                         |        |                                                                                                                                                                                                                                                                                                                 |                                                             |         |        |                                                                                                  |                                            |                                                                            |                                                |
| Low molecular weight phosphotyrosine protein phosphatase                                            | Q9D358 | K.QLIIEDPY@YGNDSDFEVVYQQC*LR.C<br>L.GSYDPQQLIIEDPY@YGNDSDFE<br>K.QLIIEDPY@YGNDSDFEVVYQQC*LR.C                                                                                                                                                                                                                   | Y131<br>Y131<br>Y132                                        | N       | U      | 4,5<br>15,18<br>4,5                                                                              | 3<br>2<br>2<br>1                           | 4.80<br>4.50<br>3.89<br>2.37                                               | 3<br>2<br>3<br>2                               |
| 14 kDa phosphohistidine phosphatase -- Phosphohistidine phosphatase 1                               | Q9DAK9 | R.KIHVYGY@SM#GYGR.A                                                                                                                                                                                                                                                                                             | Y92                                                         | N*      | U      | 2,5                                                                                              | 2                                          | 4.26                                                                       | 3                                              |
| Protein phosphatase 1 regulatory subunit 12A                                                        | Q9DBR7 | R.TYDETY@TR.Y<br>Y.SRTYDETY@TRY.R                                                                                                                                                                                                                                                                               | Y764<br>Y764                                                | N       | U      | 1,10<br>11,15,16,17,18                                                                           | 2<br>5                                     | 2.27<br>3.47                                                               | 2<br>2                                         |
| Protein phosphatase 2 regulatory subunit B56 delta isoform                                          | Q99PC9 | R.KSELQDQVY@T*IK.A                                                                                                                                                                                                                                                                                              | Y572                                                        | N*      | C      | 1,3                                                                                              | 2                                          | 3.23                                                                       | 2                                              |
| Serine/threonine protein phosphatase 2A, catalytic subunit, alpha isoform -- PP2A alpha (PP2A beta) | P63330 | R.QITQVY@GFYDEC*LR.K<br>R.C*GNQAAIMELDDTLKY@SFLQDFPAPR.R                                                                                                                                                                                                                                                        | Y127<br>Y284                                                | Y<br>N* | U<br>U | 1,2,3,7,9<br>3                                                                                   | 5<br>1                                     | 3.60<br>3.10                                                               | 2<br>3                                         |
| Tyrosine-protein phosphatase, non-receptor type 11 -- SHP-2                                         | P35235 | H.IKIQNTGDY@YDLY.G<br>K.IQNTGDY@YDLYGGEK.F                                                                                                                                                                                                                                                                      | Y62<br>Y62                                                  | N       | C      | 11,12,13,14,15,16,17,18<br>1,2,3,4,5,7                                                           | 8<br>8                                     | 3.55<br>4.69                                                               | 2<br>2                                         |
| Tyrosine-protein phosphatase, non-receptor type 14                                                  | Q62130 | R.NLNIINTHAYNQPEELVY@SQPEMR.E                                                                                                                                                                                                                                                                                   | Y485                                                        | Y       | U      | 1,3,5,6,7,9                                                                                      | 6                                          | 5.64                                                                       | 3                                              |
| <b>SIGNALING: SMALL G PROTEINS AND REGULATORS</b>                                                   |        |                                                                                                                                                                                                                                                                                                                 |                                                             |         |        |                                                                                                  |                                            |                                                                            |                                                |
| ARF GTPase-activating protein GIT1                                                                  | Q68FF6 | F.HSTELEDDAIY@SVHVPAGLYR<br>R.LQPFHS@TELEDDAIY@SVHVPAGLYR.I<br>R.LQPFHST@ELEDDAIY@SVHVPAGLYR.I<br>R.LQPFHSTELEDDAIY@SVHVPAGLYR@R.I<br>R.LQPFHSTELEDDAIY@SVHVPAGLYR.I<br>R.LQPFHS*TELEDDAIY@SVHVPAGLYR.I                                                                                                         | Y554<br>Y554<br>Y554<br>Y554,Y563<br>Y554<br>Y554           | N       | C      | 11,12,13,14,15,16,17,18<br>2,7<br>8<br>1,2,3,4,5,6,7,8,9,10<br>1,2,3,4,5,6,8,9,10<br>2,8,9       | 8<br>2<br>1<br>10<br>16<br>3               | 40<br>4.57<br>4.68<br>5.61<br>6.32<br>4.06                                 | 2<br>3<br>3<br>3<br>3<br>3                     |
| Engulfment and cell motility protein 2 -- ELMO2                                                     | Q8BHL5 | K.EVC*DGWSLPNPEY@YTLR.Y                                                                                                                                                                                                                                                                                         | Y48                                                         | N       | U      | 2                                                                                                | 1                                          | 3.09                                                                       | 2                                              |
| Glucocorticoid receptor DNA binding factor 1 [fragment] -- p190RhoGAP                               | Q91YM2 | R.NEEENIY@SVPHDSTQGK.I                                                                                                                                                                                                                                                                                          | Y943                                                        | N       | C      | 1,2,3,4,5,6,7,8,9,10                                                                             | 10<br>10                                   | 3.38<br>5.09                                                               | 3<br>2                                         |
| Myosin phosphatase Rho-interacting protein -- MRIP                                                  | P97434 | K.VRVESGY@FSLEK.A<br>K.YASDKYKDIY@TELSIAK.A                                                                                                                                                                                                                                                                     | Y268<br>Y944                                                | N*      | U      | 1,2,4,5<br>4,5                                                                                   | 5<br>1<br>2                                | 3.59<br>4.04<br>4.01                                                       | 2<br>3<br>3                                    |
| Rab GDP dissociation inhibitor alpha -- Rab GDI alpha (Rab GDI beta)                                | P50396 | K.VLHMDRNPY@YGGESSITPLEELYK.R<br>K.SPYLYPLY@GLGELPQGFAR.L                                                                                                                                                                                                                                                       | Y38<br>Y229                                                 | N*      | U      | 3,9<br>10                                                                                        | 2<br>1                                     | 5.00<br>3.60                                                               | 3<br>2                                         |
| Rab GDP dissociation inhibitor beta -- Rab GDI beta                                                 | Q61598 | K.KVLHMDQNPY@YGGESASITPLEDLYK.R<br>K.KVLHMDQNPY@YGGESASITPLEDLYK.R<br>K.VLHM#DQNPY@YGGESASITPLEDLYK.R<br>K.VLHMDQNPY@YGGESASITPLEDLYK.R<br>K.VLHMDQNPY@YGGESASITPLEDLYK.R<br>L.HMDQNPY@YGGESASITPLEDLYK<br>K.KVLHMDQNPYY@GGESASITPLEDLYK.R<br>K.VLHM#DQNPYY@GGESASITPLEDLYK.R<br>K.VLHMDQNPYY@GGESASITPLEDLYK.R | Y38<br>Y38<br>Y38<br>Y38<br>Y38<br>Y38<br>Y39<br>Y39<br>Y39 | Y       | U      | 1,3,5,6,7,9<br>1,2,3,4,5<br>2,6,8<br>1,4,7,8,9,10<br>1,2,3,4,5,6,7,9,10<br>11<br>7<br>3<br>3,5,6 | 6<br>5<br>3<br>6<br>10<br>1<br>1<br>1<br>3 | 31<br>5.77<br>6.08<br>5.39<br>4.99<br>6.58<br>4.62<br>5.63<br>5.54<br>4.22 | 3<br>3<br>3<br>3<br>3<br>2<br>3<br>3<br>3<br>3 |

|                                                                |        |                                                                                                                                                                                                                                                                                                                                                                                                                                                       |                                                                                                                 |                                                              |                                                              |                                                                                                                                                          |                                                                |                                                                     |                                                                                                      |                                                               |
|----------------------------------------------------------------|--------|-------------------------------------------------------------------------------------------------------------------------------------------------------------------------------------------------------------------------------------------------------------------------------------------------------------------------------------------------------------------------------------------------------------------------------------------------------|-----------------------------------------------------------------------------------------------------------------|--------------------------------------------------------------|--------------------------------------------------------------|----------------------------------------------------------------------------------------------------------------------------------------------------------|----------------------------------------------------------------|---------------------------------------------------------------------|------------------------------------------------------------------------------------------------------|---------------------------------------------------------------|
| Ras GTPase-activating-like protein -- IQGAP1                   | Q9JKF1 | L.RSPDVGLY@GVIPEC*GETY.Q<br>L.SALRSPDVGLY@GVIPEC*GETY.Q<br>L.VKLQTTY@SAL.N                                                                                                                                                                                                                                                                                                                                                                            | Y654<br>Y654<br>Y1510                                                                                           | N*<br>N                                                      | U<br>C                                                       | 11,14<br>11,16<br>12                                                                                                                                     | 2<br>2<br>1                                                    | 4<br>1                                                              | 4.09<br>4.84<br>2.36                                                                                 | 2<br>2<br>2                                                   |
| Ras and Rab interactor 1                                       | Q921Q7 | K.EKPSTDPLY@DTPDTR.G                                                                                                                                                                                                                                                                                                                                                                                                                                  | Y35                                                                                                             | N                                                            | C                                                            | 1,2,3,10                                                                                                                                                 | 3<br>1                                                         | 4                                                                   | 2.61<br>2.84                                                                                         | 2<br>3                                                        |
| Rho-GTPase-activating protein 12                               | Q8C0D4 | R.AT@TPPNQGRPDS@PVY@ANLQELK.I<br>R.ATT@PPNQGRPDS@PVY@ANLQELK.I                                                                                                                                                                                                                                                                                                                                                                                        | Y241<br>Y241                                                                                                    | N                                                            | C                                                            | 9<br>2,4                                                                                                                                                 | 1<br>2                                                         | 3                                                                   | 2.78<br>3.82                                                                                         | 3<br>3                                                        |
| Rho/rac guanine nucleotide exchange factor (GEF) 2 -- ARHGEF2  | Q923E0 | R.RRS@LPAGDALY@LSFNPPQPSR.G<br>R.SLPAGDALY@LSFNPPQPSR.G                                                                                                                                                                                                                                                                                                                                                                                               | Y893<br>Y893                                                                                                    | N*                                                           | U                                                            | 2<br>2,4                                                                                                                                                 | 1<br>2                                                         | 3                                                                   | 3.75<br>3.09                                                                                         | 3<br>2                                                        |
| TBC1 domain family member 15                                   | Q9CXF4 | K.SLSQSFENLLDEPAY@GLIQK.I                                                                                                                                                                                                                                                                                                                                                                                                                             | Y215                                                                                                            | N                                                            | U                                                            | 8                                                                                                                                                        | 1                                                              | 1                                                                   | 4.90                                                                                                 | 2                                                             |
| <b>SIGNALING: OTHER</b>                                        |        |                                                                                                                                                                                                                                                                                                                                                                                                                                                       |                                                                                                                 |                                                              |                                                              |                                                                                                                                                          |                                                                |                                                                     |                                                                                                      |                                                               |
| 53BP2: Apoptosis stimulating of p53 protein 2 [fragment]       | Q8CG79 | R.KPQTVAAISSY@SMYQQQAPGK.N                                                                                                                                                                                                                                                                                                                                                                                                                            | Y569                                                                                                            | N*                                                           | U                                                            | 2,9                                                                                                                                                      | 2                                                              | 2                                                                   | 4.37                                                                                                 | 3                                                             |
| Ankyrin repeat and SAM domain containing protein 1 -- ANKS1    | P59672 | L.ILHFDTHADEEGPY@EALY.N<br>L.AVRPQISSAPQEEEEHPY@ELL.L<br>L.AVRPQISSAPQEEEEHPY@ELL.L<br>R.IQSSAPQEEEEHPY@ELLLTAETK.K<br>R.IQSSAPQEEEEHPY@ELLLTAETK.L                                                                                                                                                                                                                                                                                                   | Y377<br>Y471<br>Y471<br>Y471<br>Y471                                                                            | Y<br>N*                                                      | U<br>C                                                       | 16,17<br>12,15,18<br>15<br>2<br>2,3                                                                                                                      | 2<br>3<br>1<br>1<br>2                                          | 2<br>7                                                              | 3.06<br>3.75<br>3.96<br>3.41<br>3.92                                                                 | 2<br>3<br>3<br>3<br>3                                         |
| Annexin A1                                                     | P10107 | R.ALY@EAGER.R<br>R.ALY@EAGERR.K                                                                                                                                                                                                                                                                                                                                                                                                                       | Y206<br>Y206                                                                                                    | N*                                                           | U                                                            | 1<br>4                                                                                                                                                   | 1<br>1                                                         | 2                                                                   | 2.23<br>2.22                                                                                         | 2<br>2                                                        |
| Annexin A2                                                     | P07356 | C.KLSLEGDHSPPSAY@GSVKPY.T<br>K.LSLEGDHSPPSAY@GSVKPYTNFDAER.D<br>L.SLEGDHSPPSAY@GSVKPY.T<br><br>K.SYSPY@DMLESIK.K<br>K.SYSPY@DMLESIK.K<br>F.ADRLY@DSM.K<br>L.YFADRLY@DSM#.K<br>L.YFADRLY@DSM.K<br>Y.FADRLY@DSM.K<br>K.SLY@YIQQDTK.G<br>K.SLY@YIQQDTK.G<br>K.SLY@Y@YIQQDTK.G                                                                                                                                                                            | Y23<br>Y23<br>Y23<br><br>Y237<br>Y237<br>Y274<br>Y274<br>Y274<br>Y274<br>Y315<br>Y316<br>Y315,Y316              | N<br>N<br>N<br><br>N<br>N*                                   | C<br>C<br>C<br><br>U<br>U                                    | 12<br>1,2,4,5,8,9<br>11,12,13,14,16,18<br><br>10<br>1,2,4,5,7,8,9,10<br>11<br>11,17,18<br>11,12,15,16,17,18<br>11,16,18<br>6,7,9,10<br>2,4,7,9,10<br>1,2 | 1<br>6<br>4<br>6<br>1<br>9<br>1<br>4<br>6<br>3<br>4<br>5<br>2  | 17<br>10<br>14                                                      | 3.56<br>5.43<br>3.87<br>4.45<br>2.60<br>3.71<br>1.94<br>3.16<br>3.00<br>2.27<br>3.70<br>4.05<br>3.46 | 3<br>3<br>3<br>2<br>2<br>2<br>2<br>2<br>2<br>2<br>2<br>2      |
| Annexin A5                                                     | P48036 | R.SIPAYLAETLY@YAMK.G<br>K.NFATSLY@SMIK.G                                                                                                                                                                                                                                                                                                                                                                                                              | Y254<br>Y295                                                                                                    | N*<br>N*                                                     | U<br>U                                                       | 8<br>7                                                                                                                                                   | 1<br>1                                                         | 1<br>1                                                              | 2.72<br>2.53                                                                                         | 2<br>2                                                        |
| Annexin A6                                                     | P14824 | R.GSVHDFPEFDANQDAEALY@TAM#.K<br>R.GSVHDFPEFDANQDAEALY@TAMK.G<br><br>Y.RGSVHDFPEFDANQDAEALY@TAM#.K<br>Y.RGSVHDFPEFDANQDAEALY@TAM.K                                                                                                                                                                                                                                                                                                                     | Y29<br>Y29<br><br>Y29<br>Y29                                                                                    | N*                                                           | U                                                            | 9<br>1,2,6,7,8,9,10<br><br>15,17<br>11,12,15,16,17                                                                                                       | 1<br>8<br>3<br>2<br>2<br>5                                     | 21                                                                  | 4.38<br>5.59<br>5.47<br>4.32<br>3.81<br>3.99                                                         | 3<br>3<br>2<br>3<br>2<br>3                                    |
| Annexin A11                                                    | P97384 | K.TPVLFDVY@EIKEAIK.G                                                                                                                                                                                                                                                                                                                                                                                                                                  | Y277                                                                                                            | N*                                                           | U                                                            | 1,2,6,7,8                                                                                                                                                | 5<br>1                                                         | 6                                                                   | 4.29<br>3.49                                                                                         | 3<br>2                                                        |
| Cell division cycle and apoptosis regulator protein 1 -- CARP1 | Q8CH18 | R.VLVEATY@NPNMPFK.W<br>R.VLVEATY@NPNMPFKWNAQR.I                                                                                                                                                                                                                                                                                                                                                                                                       | Y189<br>Y189                                                                                                    | N                                                            | U                                                            | 2,3,4,5<br>5                                                                                                                                             | 4<br>1                                                         | 5                                                                   | 4.23<br>3.16                                                                                         | 2<br>3                                                        |
| Caveolin-1                                                     | P49817 | K.YVDSEGHLY@TVPIR.E                                                                                                                                                                                                                                                                                                                                                                                                                                   | Y14                                                                                                             | N                                                            | C                                                            | 1,2,3,4,5,6                                                                                                                                              | 6                                                              | 6                                                                   | 3.75                                                                                                 | 2                                                             |
| Proto-oncogene c-Crk                                           | Q64010 | Q.KRVPNAY@DKTALA                                                                                                                                                                                                                                                                                                                                                                                                                                      | Y251                                                                                                            | N*                                                           | C                                                            | 11                                                                                                                                                       | 1                                                              | 1                                                                   | 2.60                                                                                                 | 3                                                             |
| Cyclin-dependent kinases regulatory subunit 2                  | P56390 | Y.SDKYFDEHY@EY.R<br>Y.SDKYFDEHY@EY.R                                                                                                                                                                                                                                                                                                                                                                                                                  | Y17<br>Y17                                                                                                      | Y                                                            | U                                                            | 11,12,17,18<br>17                                                                                                                                        | 4<br>1                                                         | 5                                                                   | 3.30<br>2.67                                                                                         | 2<br>2                                                        |
| Docking protein 1 -- Dok1                                      | P97465 | K.TVPPVPQDPLGSPALY@AEPLDSL.R.I<br>R.IPPGPSQDSVY@SDPLGSTPAGAGEGVH.SK.K<br>K.KPLY@WDLY@GHVQQQLL.K.T<br>K.KPLYWDLY@GHVQQQLL.K.T<br>K.LTDSKEDIY@DEPEGLAPAPPR.G<br><br>K.TKLTDSKEDIY@DEPEGLAPAPPR.G<br>K.TKLTDS*KEDIY@DEPEGLAPAPPRGLY@DLQPQR.D<br>R.D<br>L.KTKLTDSKEDIY@DEPEGLAPAPPRGLY.D<br>L.LKTKLTDSKEDIY@DEPEGLAPAPPRGLY.D<br>K.LTDSKEDIY@DEPEGLAPAPPRGLY@DLQPQR.D<br>D<br>K.LTDS*KEDIY@DEPEGLAPAPPRGLY@DLQPQR.D<br>D<br>R.LKEEGY@ELPY@NPATDDYAVPPPR.S | Y295<br>Y314<br>Y336,Y340<br>Y340<br>Y361<br><br>Y361<br>Y361<br>Y361<br>Y361<br>Y361,Y376<br>Y376<br>Y397,Y401 | N<br>N<br>N<br>N<br>N<br><br>N<br>N<br>N<br>N<br>N<br>N<br>N | U<br>C<br>U<br>C<br>C<br><br>U<br>U<br>U<br>U<br>U<br>U<br>U | 2<br>1,2,4,5,6,7,8,9,10<br>3,4<br>1,2,3,5,8,10<br>1,2,3,4,5,6,7,8<br><br>1,2,3,4,5,6,8,9,10<br>3<br>12,18<br>11<br>1,2,3,4,5<br>5<br>4                   | 1<br>9<br>2<br>8<br>8<br>3<br>14<br>1<br>2<br>2<br>5<br>1<br>1 | 1<br>9<br>2<br>10<br>34<br><br>6<br>5<br>3<br>3<br>3<br>3<br>6<br>3 | 2.60<br>4.62<br>3.06<br>5.06<br>3.94<br>4.36<br>5.25<br>3.41<br>3.79<br>5.15<br>4.46<br>3.33<br>2.88 | 3<br>3<br>3<br>3<br>3<br>2<br>3<br>3<br>3<br>3<br>3<br>3<br>3 |

|                                                                              |        |                                                                                                                                                                                                                                                   |                                                                             |                              |                                  |                                                                   |                                      |                               |                                                              |                                 |
|------------------------------------------------------------------------------|--------|---------------------------------------------------------------------------------------------------------------------------------------------------------------------------------------------------------------------------------------------------|-----------------------------------------------------------------------------|------------------------------|----------------------------------|-------------------------------------------------------------------|--------------------------------------|-------------------------------|--------------------------------------------------------------|---------------------------------|
|                                                                              |        | R.LKEEGYELPY@NPATDDYAVPPR.S<br>R.LKEEGYELPY@NPATDDYAVPPR.S<br>R.LKEEGYELPYNPATDDY@AVPPR.S<br>R.LKEEGY@ELPYNPATDDY@AVPPR.S<br>R.LKEEGYELPY@NPATDDY@AVPPR.S<br>R.LKEEGYELPY@NPATDDY@AVPPR.S@PK.P<br>F.SSDTALY@SQVQKSGTSGAW.D<br>K.GFSSDTALY@SQVQK.S | Y401<br>Y401<br>Y408<br>Y397,Y408<br>Y401,Y408<br>Y401,Y408<br>Y450<br>Y450 | N<br><br>N<br><br><br>N<br>N | U<br><br>C<br><br><br><br>C<br>C | 1,2<br>6<br>2<br>4,7<br>3,4,5,6,7,9,10<br>2<br>11,12<br>1,2,3,4,5 | 2<br>1<br>1<br>2<br>8<br>1<br>2<br>5 | 13<br><br>12<br><br><br><br>7 | 3.30<br>2.68<br>2.92<br>3.21<br>3.59<br>3.66<br>5.11<br>4.89 | 3<br>3<br>3<br>3<br>3<br>3<br>2 |
| Epidermal growth factor receptor kinase substrate 8 -- EPS8                  | Q08509 | R.LSTEHSNVSDY@PPADGYAYSSSMYHR.G                                                                                                                                                                                                                   | Y484                                                                        | N                            | U                                | 2,7,9,10                                                          | 4                                    | 4                             | 3.92                                                         | 3                               |
| Hepatocyte growth factor-regulated tyrosine kinase substrate -- HGS/ Hrs     | Q99LI8 | R.VC*EPC*Y@EQLNK.K                                                                                                                                                                                                                                | Y216                                                                        | N                            | U                                | 1,2,3,7,10                                                        | 5                                    | 5                             | 3.55                                                         | 2                               |
| Insulin receptor substrate 1 -- IRS-1                                        | P35569 | R.AASEAGGPAREY@YENEKK.W                                                                                                                                                                                                                           | Y46                                                                         | N                            | U                                | 2                                                                 | 1                                    | 1                             | 3.34                                                         | 3                               |
| Insulin receptor substrate 2 -- IRS-2                                        | P81122 | K.VAYNPYPEDY@GDIEIGSHK.S                                                                                                                                                                                                                          | Y628                                                                        | N*                           | U                                | 2,4                                                               | 2                                    | 2                             | 2.58                                                         | 3                               |
| Kin of IRRE-like protein 1 precursor -- KIRREL                               | Q80W68 | R.C*DTIDTREEY@EMKDPTNGY@YNVR.A<br>R.C*DTIDT@REEYEMKDPTNGY@YNVR.A<br>R.EEYEMKDPTNGY@YNVR.A<br>Y.RLGYPOAPPSGLERTPY@EAY@DPIGKYA                                                                                                                      | Y628,Y637<br>Y637<br>Y637<br>Y753,Y756                                      | N*<br>N*<br><br>N*N          | U<br>C<br><br>C.C                | 1<br>2<br>1,2<br>11,16                                            | 1<br>1<br>2<br>2                     | 1<br>4<br><br>2,2             | 3.51<br>4.29<br>3.07<br>3.95                                 | 3<br>3<br>3<br>3                |
| Latrophilin-2                                                                | Q8JZZ7 | R.SENEDIY@YK.S<br>R.GNSDGY@IIPINK.E                                                                                                                                                                                                               | Y838<br>Y865                                                                | N*<br>N*                     | U<br>U                           | 2<br>1                                                            | 1<br>1                               | 1<br>1                        | 2.05<br>2.06                                                 | 2<br>2                          |
| Non-catalytic region of tyrosine kinase adaptor protein 1 -- NCK1            | Q99M51 | K.PSVPDTASPADDSFVDPGERLY@DLNMPAFVK.F<br>K.RKPS@VPDTASPADDSFVDPGERLY@DLNMPAFVK.F<br>K.RKPSVPDTASPADDSFVDPGERLY@DLNMPAFVK.F<br>R.KPSVPDTASPADDSFVDPGERLY@DLNMPAFVK.F                                                                                | Y105<br>Y105<br>Y105<br>Y105                                                | N                            | C                                | 2,10<br>5,10<br>4<br>1,3,4,5                                      | 2<br>2<br>1<br>4                     | 9                             | 3.65<br>4.81<br>4.70<br>4.88                                 | 3<br>3<br>3<br>3                |
| Notchless homolog 1                                                          | Q8VEJ4 | K.LATDLPGHADEVY@AVDWSPDGQR.V                                                                                                                                                                                                                      | Y459                                                                        | Y                            | U                                | 1,3,4                                                             | 3                                    | 3                             | 4.36                                                         | 3                               |
| Phosphatidylinositol 3-kinase regulatory alpha subunit -- p85 alpha          | P26450 | K.SREYDRLY@EEYTR.T<br>K.LNEWLGNENTEDQY@SLVEDDELPHHDEK.T                                                                                                                                                                                           | Y467<br>Y607                                                                | N<br>N                       | C<br>C                           | 2,3,6,8,9,10<br>1,2,4,9                                           | 6<br>4                               | 6<br>4                        | 4.07<br>5.67                                                 | 3<br>3                          |
| Phosphatidylinositol 3-kinase, regulatory subunit, polypeptide 2 -- p85 beta | O08908 | R.EYDQLY@EEYTR.T                                                                                                                                                                                                                                  | Y458                                                                        | N                            | C                                | 1,10                                                              | 2                                    | 2                             | 2.82                                                         | 2                               |
| Phospholipase C, gamma 1                                                     | Q6P1G1 | K.IGTAEPDY@GALY@EGRNPGFYVEANPMPTFK.C<br>K.IGTAEPDY@GALY@EGRNPGFY@VEANPMPTFK.C<br>K.IGTAEPDY@GALY@EGRNPGFYVEANPMPTFK.C                                                                                                                             | Y771,Y775<br>Y775,Y783<br>Y775                                              | N<br>N<br>N                  | U<br>U<br>U                      | 9<br>2,10<br>1,2,10                                               | 1<br>3<br>3                          | 1<br>3<br>7                   | 3.70<br>5.26<br>5.18                                         | 3<br>3<br>3                     |
| Protein Wnt-2b precursor                                                     | O70283 | K.GTDGG*EIMCCGRGY@DTTR.V                                                                                                                                                                                                                          | Y342                                                                        | N*                           | U                                | 3                                                                 | 1                                    | 1                             | 2.85                                                         | 2                               |
| Guanine nucleotide-binding protein beta subunit 2-like 1 -- RACK1            | P68040 | K.HLY@TLDGGDIINALC*FSPNR.Y<br>L.WDLNEGKHL@TLDGGDIINALC<br>W.DLNEGKHL@TLDGGDIINALC<br>W.DLNEGKHL@TLDGGDIINALC*F.S                                                                                                                                  | Y227<br>Y227<br>Y227<br>Y227                                                | N                            | U                                | 7,8,10<br>11<br>11,12<br>17                                       | 2<br>1<br>2<br>1                     | 7                             | 3.88<br>5.57<br>3.29<br>4.41<br>3.14                         | 3<br>2<br>2<br>2<br>3           |
| Retinoic acid-induced protein 3                                              | Q8BHL4 | F.SIPRAQAPASPY@NDY@EGRKGDS.-<br>F.SIPRAQAPASPY@NDY@EGRKGDS^.-                                                                                                                                                                                     | Y346,Y349<br>Y346                                                           | N<br>N                       | U<br>U                           | 11,12<br>11                                                       | 2<br>1                               | 2<br>3                        | 4.84<br>2.84                                                 | 3<br>3                          |
| SH2 domain-containing adapter protein B -- SHB                               | Q6PD21 | R.DFEDPY@NGPGSSLR.K                                                                                                                                                                                                                               | Y95                                                                         | Y                            | U                                | 2,4                                                               | 3                                    | 3                             | 3.52                                                         | 2                               |
| SHC transforming protein 1 -- SHC1                                           | P98083 | R.ELFDDPSY@VNIQLDK.A<br>R.MAGFDGSAWDEEEEEPPDHQY@Y@NDFPGKEPPLGGVDMR.L<br>R.MAGFDGSAWDEEEEEPPDHQY@Y@NDFPGKEPPLGGVDMR.L<br>F.DGSAWDEEEEEPPDHQY@Y@NDFPGKEPPLGGVDMR.R                                                                                  | Y423<br>Y349,Y350<br>Y349,Y350<br>Y349,Y350                                 | N<br>N<br>N                  | C<br>C<br>C                      | 1,2,3,4,6,7,9,10<br>8<br>1,3,8,9,10<br>16                         | 8<br>1<br>7<br>1                     | 8<br>9<br>9                   | 5.21<br>3.98<br>4.82<br>4.98                                 | 2<br>3<br>3<br>3                |
| SHC SH2 domain-binding protein 1                                             | Q9Z179 | R.SWDEEEDEY@DYFVR.C                                                                                                                                                                                                                               | Y217                                                                        | N*                           | U                                | 6,7,9,10                                                          | 4                                    | 4                             | 5.15                                                         | 2                               |
| SH2-containing inositol 5-phosphatase 2 -- SHIP2                             | Q9JLL7 | R.FSEEEISFPPTY@RYER.G<br>K.NSFNNPAY@YVLEGVPHQLLPLEPPSLAR.A                                                                                                                                                                                        | Y662<br>Y987                                                                | N*<br>N                      | U<br>C                           | 6,8<br>3,4,5,7,8,9,10                                             | 2<br>9                               | 2<br>9                        | 2.88<br>5.83                                                 | 3<br>3                          |
| Sorbin and SH3 domain-containing protein 1 -- SORBS1                         | Q62417 | K.TPVDYIDL@SSSPSR.S                                                                                                                                                                                                                               | Y1198                                                                       | N                            | U                                | 2,4,7,8                                                           | 4                                    | 4                             | 4.82                                                         | 2                               |
| Signal transducing adapter molecule 2 -- STAM-2                              | O88811 | K.LVNEAPVY@SVYS@K.L<br>K.LVNEAPVY@SVYS@K.L<br>Y.NKLVNEAPVY@SVY.S                                                                                                                                                                                  | Y371<br>Y371<br>Y371                                                        | N                            | U                                | 2<br>1,2,4,7<br>15                                                | 1<br>4<br>1                          | 6                             | 2.89<br>3.25<br>2.45                                         | 2<br>2<br>2                     |
| Signal transducer and activator of transcription 3 - STAT3                   | P42227 | R.QFLAPWIESQDWAY@AASK.E<br>K.YC*RPESQHEPADPGSAAPY@LK.T                                                                                                                                                                                            | Y45<br>Y705                                                                 | N*<br>N                      | U<br>C                           | 1<br>7                                                            | 1<br>1                               | 1<br>1                        | 3.81<br>2.97                                                 | 2<br>3                          |

|                                                                                                                                         |        |                                                                                                                                                                                                                                                                                                                         |                                                                                                               |                                                         |                                                         |                                                                                                                                                    |                                                                           |                                                                   |                                                                                                                              |                                                                         |
|-----------------------------------------------------------------------------------------------------------------------------------------|--------|-------------------------------------------------------------------------------------------------------------------------------------------------------------------------------------------------------------------------------------------------------------------------------------------------------------------------|---------------------------------------------------------------------------------------------------------------|---------------------------------------------------------|---------------------------------------------------------|----------------------------------------------------------------------------------------------------------------------------------------------------|---------------------------------------------------------------------------|-------------------------------------------------------------------|------------------------------------------------------------------------------------------------------------------------------|-------------------------------------------------------------------------|
| STRAP: serine/threonine kinase receptor associated protein                                                                              | Q8BP89 | K.IGFPETAEEEEIEASSENSDSIY@SSTPEVKA<br>K.IGFPETAEEEEIEASSENSDSIY@SSTPEVKA.-                                                                                                                                                                                                                                              | Y342<br>Y342                                                                                                  | Y                                                       | U                                                       | 4,8<br>8,10                                                                                                                                        | 2<br>2                                                                    | 4                                                                 | 4.01<br>4.58                                                                                                                 | 3<br>3                                                                  |
| Striatin                                                                                                                                | O55106 | K.STSLDVEPIY@TFR.A<br>W.NLQKTAPAKKSTSLDVEPIY@TFR                                                                                                                                                                                                                                                                        | Y510<br>Y510                                                                                                  | Y                                                       | U                                                       | 3,7,8,9<br>15                                                                                                                                      | 4<br>1                                                                    | 5                                                                 | 3.80<br>2.91                                                                                                                 | 2<br>3                                                                  |
| Striatin-3                                                                                                                              | Q9ERG2 | K.SASLDVEPIY@TFR.A                                                                                                                                                                                                                                                                                                      | Y526                                                                                                          | N*                                                      | U                                                       | 1,2,4,5,6,7,8,9,10                                                                                                                                 | 10                                                                        | 10                                                                | 3.72                                                                                                                         | 2                                                                       |
| hypothetical SH3/Phox-like/Src homology 3 (SH3) domain profile/Proline-rich region profile/PX domain profile containing protein -- TKS4 | Q3TB89 | R.VTWSSGATEAIY@R.R<br>K.TEPAQSEDHVDIY@NLR.S                                                                                                                                                                                                                                                                             | Y42<br>Y661                                                                                                   | Y<br>N                                                  | U<br>U                                                  | 2,4<br>1,2,3,7,8,9,10                                                                                                                              | 2<br>7                                                                    | 2<br>7                                                            | 2.77<br>4.82                                                                                                                 | 2<br>2                                                                  |
| <b>ADHESION: CELL/ECM</b>                                                                                                               |        |                                                                                                                                                                                                                                                                                                                         |                                                                                                               |                                                         |                                                         |                                                                                                                                                    |                                                                           |                                                                   |                                                                                                                              |                                                                         |
| Bystin                                                                                                                                  | O54825 | R.GREVEEEEEY@VGPR.L                                                                                                                                                                                                                                                                                                     | Y48                                                                                                           | Y                                                       | U                                                       | 2,7                                                                                                                                                | 2                                                                         | 3                                                                 | 4.15                                                                                                                         | 2                                                                       |
| CRK-associated substrate -- p130cas                                                                                                     | Q61140 | -.MTVPNVLAKALY@DNVAESPDELSFR.K<br>K.ALY@DNVAESPDELSFR.K<br>Y.VYEAAQTEQDEY@DTPRHLL<br>R.HLLAPGPDY@DVPPV.R.G<br><br>R.GLLPNQYQVEY@DTPPMAVK.G<br><br>K.GPNGRDPLLDVY@DVPPSVEK.G<br>K.GLLSSSHSVY@DVPPSVSK.D<br>R.RPGPGTLY@DVPR.E<br>R.VLPPEVADGVSVDGQVY@AVPPPAER.E<br>R.ERVLPEVADGVSVDGQVY@AVPPPAER.E<br>L.SRQLQKMEDVY@QTL.V | Y12<br>Y12<br>Y238<br>Y253<br><br>Y271<br><br>Y291<br>Y310<br>Y391<br>Y414<br>Y414<br>Y556                    | Y<br><br>N<br>N<br><br>N*<br><br>N*<br>N<br>N<br>N<br>Y | U<br><br>C<br>C<br><br>C<br><br>C<br>C<br>C<br>C<br>C   | 1<br>1,10<br>17<br>1,2,3,4,5,7<br><br>2,4,7,8<br><br>2,5<br>2<br>2<br>2<br>1,2,3,4,6,7,8,9,10<br>9<br>11,12                                        | 1<br>2<br>1<br>5<br>5<br>2<br>4<br>2<br>1<br>1<br>18<br>1<br>2            | 3<br><br>1<br>10<br><br>6<br><br>2<br>2<br>1<br>2<br>19<br>2<br>2 | 3.33<br>5.05<br>3.87<br>3.43<br>4.37<br>3.34<br>4.07<br>4.38<br>3.76<br>2.05<br>4.98<br>3.32<br>3.06                         | 3<br>2<br>3<br>3<br>2<br>3<br>2<br>3<br>3<br>2<br>2<br>3<br>3<br>2<br>2 |
| Lipoma-preferred partner homolog -- LPP                                                                                                 | Q8BFW7 | H.YMAGPSSGQIY@GPGPRGY.N<br>Y.MAGPSSGQIY@GPGPRGY.N<br><br>M.AGPSSGQIY@GPGPRGY.N<br>R.YYEPY@YAAGPSYGGR.S<br><br>Y.TSNQGRYYPY@YAAGPSY.G<br>R.YYEPY@Y@AAGPSYGGR.S<br>R.YYEPY@AAGPSYGGR.S<br><br>K.KMLY@DMENPPADDYFGR.C<br><br>K.MLY@DMENPPADDYFGR.C<br>K.KMLYDMENPPADDY@FGR.C<br><br>K.MLYDMENPPADDY@FGR.C                  | Y245<br>Y245<br><br>Y245<br>Y301<br><br>Y301<br>Y301.Y302<br>Y302<br><br>Y403<br><br>Y403<br>Y413<br><br>Y413 | N<br><br>N<br><br>N<br><br>N<br><br>Y<br><br>Y<br><br>Y | C<br><br>C<br><br>C<br><br>C<br><br>U<br><br>U<br><br>U | 11,12,13<br>11,12,14<br><br>11,12<br>1,2,3,4,5,6,7,8,9,10<br><br>11<br>7<br>1,2,3,4,5,6,7,8,9,10<br><br>1,2,4<br><br>1,2,4<br>1,2,4<br><br>1,2,4,9 | 4<br>3<br>1<br>2<br>1<br>13<br>1<br>1<br>2<br>12<br>1<br>2<br>3<br>1<br>4 | 10<br><br>16<br><br>15<br><br>6<br>8<br><br>8                     | 4.67<br>3.93<br>4.47<br>3.39<br>3.14<br>4.44<br>5.02<br>3.35<br>3.80<br>4.83<br>3.33<br>5.85<br>5.63<br>3.73<br>4.01<br>5.51 | 2<br>2<br>3<br>2<br>3<br>2<br>2<br>2<br>3<br>2<br>3<br>2<br>2<br>3<br>2 |
| Paxillin                                                                                                                                | Q8VI36 | F.LSEEPY@SYPTGNHTY.Q<br>R.AGEEHVY@SFPNK.Q<br><br>R.AGEEHVY@SFPNKQK.S                                                                                                                                                                                                                                                    | Y31<br>Y118<br><br>Y118                                                                                       | N<br>N<br><br>N                                         | C<br>C<br><br>C                                         | 11,14<br>1,2,7,8,10<br><br>1,2,3,4,5,6,9,10                                                                                                        | 2<br>2<br>5<br>11                                                         | 2<br>18<br><br>11                                                 | 3.82<br>3.65<br>4.40<br>4.44                                                                                                 | 2<br>3<br>2<br>3                                                        |
| Syndecan-4 precursor                                                                                                                    | O35988 | Y.KKAPTNEFY@A.-                                                                                                                                                                                                                                                                                                         | Y197                                                                                                          | N*                                                      | C                                                       | 11                                                                                                                                                 | 1                                                                         | 1                                                                 | 2.04                                                                                                                         | 2                                                                       |
| Talin 1                                                                                                                                 | P26039 | K.TM#QFEPSTMVY@DAC*R.M<br>K.TMQFEPSTMVY@DAC*R.M<br><br>M.QFEPSTMVY@DAC*RM.I<br>K.ALDY@YMLR.N<br>K.ALDY@YMLR.N<br>K.ALDY@MLR.N<br>K.LLGEIAQGNENY@AGIAAR.D<br>K.TLAESALQLLY@TAK.E                                                                                                                                         | Y26<br>Y26<br><br>Y26<br>Y70<br>Y70<br>Y71<br>Y1116<br>Y1777                                                  | N*<br><br>N<br><br>N*<br>N<br>N*<br>N*                  | C<br><br>C<br><br>U<br>C<br>C<br>U                      | 3,5<br>1,2,3,4,5,9,10<br><br>12<br>3,5,6<br>2,3,4,6,7<br>1<br>1,2,3<br>1,2,3,7,8,10                                                                | 2<br>1<br>7<br>1<br>3<br>6<br>1<br>3<br>6                                 | 11<br><br>9<br><br>1<br>3<br>6                                    | 5.10<br>2.64<br>5.00<br>2.79<br>2.34<br>2.81<br>1.93<br>4.83<br>4.32                                                         | 2<br>3<br>2<br>2<br>2<br>2<br>2<br>2<br>2                               |
| Tensin 2                                                                                                                                | Q8CJ95 | R.YGHSGYPALVTY@GYGGAVPSYC*PAYGR.A                                                                                                                                                                                                                                                                                       | Y766                                                                                                          | Y                                                       | U                                                       | 2,6,8,9,10                                                                                                                                         | 5                                                                         | 5                                                                 | 4.10                                                                                                                         | 3                                                                       |
| Tensin 3                                                                                                                                | Q5SSZ5 | K.LYQAMQPVTYSGIY@NVGSENPSR.I<br><br>L.HTQGPVDGSLY@AKVR.K<br>R.KPSAPTPVQAY@GQSNY@STQTWVR.Q<br>R.KPSAPTPVQAYGQSNY@STQTWVR.Q                                                                                                                                                                                               | Y216<br><br>Y354<br>Y579.Y584<br>Y584                                                                         | Y<br><br>N<br>N*<br>N*                                  | U<br><br>C<br>U<br>C                                    | 2,3,4<br><br>11,12<br>1,4,8<br>2,3                                                                                                                 | 3<br>1<br>2<br>3<br>2                                                     | 4<br>2<br>3<br>5                                                  | 5.70<br>4.55<br>4.93<br>3.91<br>5.61                                                                                         | 3<br>2<br>3<br>3<br>3                                                   |
| Vinculin                                                                                                                                | Q64727 | K.LVQAAQMLQSDPY@SVPAR.D<br><br>K.LVQAAQMLQSDPY@SVPARDYLIDGSR.G<br>L.QSDPY@SVPARDY.L<br>Q.MLQSDPY@SVPARDY.L<br>R.ILLRNPGNQAAY@EHFETMK.N                                                                                                                                                                                  | Y99<br><br>Y99<br>Y99<br>Y99<br>Y691                                                                          | N<br><br>N<br>N<br>N*                                   | U<br><br>U<br>U<br>C                                    | 1,2<br><br>2,3,5,6,7,10<br>11<br>11,12<br>3                                                                                                        | 1<br>2<br>6<br>1<br>2<br>1                                                | 12<br><br>1<br>1<br>1                                             | 3.52<br>3.82<br>5.28<br>1.98<br>3.99<br>6.07                                                                                 | 3<br>2<br>3<br>2<br>2<br>3                                              |
| <b>ADHESION: CELL/CELL</b>                                                                                                              |        |                                                                                                                                                                                                                                                                                                                         |                                                                                                               |                                                         |                                                         |                                                                                                                                                    |                                                                           |                                                                   |                                                                                                                              |                                                                         |

|                                                                        |        |                                           |            |                |   |                         |      |    |      |   |
|------------------------------------------------------------------------|--------|-------------------------------------------|------------|----------------|---|-------------------------|------|----|------|---|
| Catenin delta-1 -- p120 catenin                                        | P30999 | K.LNGPQDHNHLLY@STIPR.M                    | Y96        | N              | C | 1,2,3,4,5,7,8,9,10      | 12   | 15 | 4.05 | 3 |
|                                                                        |        | R.HYEDGYPGGSDNY@GSLSR.V                   | Y228       | N              | C | 3,8,9,10                | 3    | 4  | 4.13 | 2 |
|                                                                        |        | R.FHPEPYGLEDDQRS@DDLDY@GMMSDYGTAR.R       | Y291,Y296  | N              | C | 10                      | 1    | 1  | 4.31 | 3 |
|                                                                        |        | R.FHPEPYGLEDDQRS@MGYDDLDDY@GMMS@DYGTAR.R  | Y296       | N              | C | 10                      | 1    | 5  | 5.27 | 3 |
|                                                                        |        | R.FHPEPYGLEDDQRS*MGYDDLDDY@GMMS@DYG TAR.R | Y296       |                |   | 10                      | 1    |    | 5.48 | 3 |
|                                                                        |        | R.FHPEPYGLEDDQRS*MGYDDLDDY@GMMSDYGTAR.R   | Y296       |                |   | 10                      | 1    |    | 4.99 | 3 |
|                                                                        |        | R.SMGYDDLDDY@GMMSDYGTAR.R                 | Y296       |                |   | 10                      | 1    |    | 4.72 | 3 |
|                                                                        |        | R.SMGYDDLDDY@GMMSDYGTAR.R                 | Y296       |                |   | 10                      | 1    |    | 5.25 | 2 |
|                                                                        |        | R.SMGYDDLDDY@GMMSDY@GTAR.R                | Y302       | N              | U | 10                      | 1    | 1  | 5.24 | 2 |
|                                                                        |        | R.SYEDMIGEEVPPDQY@YWAPLAQHER.G            | Y334       | N              | U | 1,2                     | 2    | 2  | 4.04 | 3 |
| R.SYEDMIGEEVPPDQYY@WAPLAQHER.G                                         | Y335   | N*                                        | U          | 9,10           | 2 | 2                       | 3.84 | 3  |      |   |
| Plakophilin-4                                                          | Q68FH0 | R.TVHMDQFGQQQY@DIY@ER.M                   | Y368,Y371  | N*             | U | 3,4,5                   | 3    | 3  | 3.90 | 3 |
|                                                                        |        | R.TVHMDQFGQQQYDIY@ER.M                    | Y371       | N*             | C | 3                       | 1    | 4  | 2.52 | 3 |
|                                                                        |        | L.RSAVSPDLHITPIY@EGRT@YY.S                | Y414       | N              | C | 17                      | 1    | 10 | 4.56 | 3 |
|                                                                        |        | R.SAVSPDLHITPIY@EGRT@YVSPVYR.S            | Y414       |                |   | 3,4,5,6,7,8,9,10        | 8    |    | 5.37 | 3 |
|                                                                        |        | R.SAVS*PDLHITPIY@EGRTYVSPVYR.S            | Y414       |                |   | 9                       | 1    |    | 2.67 | 3 |
| Scavenger receptor class F member 2 precursor                          | P59222 | R.SASSVEGPGALY@AR.V                       | Y615       | N              | C | 1                       | 1    | 1  | 2.44 | 2 |
| Tight junction protein ZO-1                                            | P39447 | R.LSYLSAPGSEY@SMYSTDSR.H                  | Y830       | N*             | C | 2                       | 1    | 1  | 4.27 | 2 |
|                                                                        |        | R.HEEQPAPAY@EVHNR.Y                       | Y1164      | N              | C | 1,2,3,4,5,6,7,9,10      | 9    | 10 | 4.49 | 3 |
|                                                                        |        | L.RHEEQPAPAY@EVHNR.Y                      | Y1164      |                |   | 11                      | 1    |    | 3.74 | 3 |
|                                                                        |        | R.YRPEAQPY@SSTGPK.S                       | Y1177      | N              | U | 1,2,3,4,5,10            | 6    | 7  | 3.18 | 2 |
|                                                                        |        | Y.RPEAQPY@SSTGPKSSEPKQY.F                 | Y1177      |                |   | 14                      | 1    |    | 3.15 | 3 |
|                                                                        |        | R.SNHY@DPEEDEEYR.K                        | Y1345      | Y              | U | 1,2,3,4,7               | 5    | 5  | 4.98 | 3 |
|                                                                        |        | R.SNHYDPEEDEEY@YR.K                       | Y1353      | N*             | U | 7                       | 1    | 8  | 2.98 | 3 |
| R.SNHYDPEEDEEY@YR.K                                                    | Y1353  |                                           |            | 2,4,6,7,8,9,10 | 7 |                         | 5.01 | 3  |      |   |
| Tight junction protein ZO-2                                            | Q9Z0U1 | R.SYHEAY@EPDY@GGGSPSYDRR.A                | Y230, Y234 |                |   | 6,7                     | 2    |    | 4.09 | 3 |
|                                                                        |        | R.SYHEAY@EPDYGGGY@SPSYDRR.A               | Y230, Y238 | N*             | U | 10                      | 1    | 1  | 4.05 | 3 |
|                                                                        |        | R.SYHEAY@EPDYGGGSPSYDRR.A                 | Y230       | Y              | U | 2,9                     | 2    | 5  | 4.47 | 3 |
|                                                                        |        | R.SYHEAYEPDY@GGGSPSYDRR.A                 | Y234       | N*             | U | 3,8,10                  | 3    | 5  | 4.57 | 3 |
|                                                                        |        | R.VFLRPSPEDEAIY@GPNTK.M                   | Y486       | N*             | U | 2                       | 1    | 2  | 3.93 | 2 |
|                                                                        |        | F.LRPSPEDEAIY@GPNTK.MVRF.K                | Y486       |                |   | 11                      | 1    |    | 4.30 | 3 |
|                                                                        |        | R.GLVREDAVLY@LLEIPKGETVILAQRSR.A          | Y554       | N              | U | 5                       | 1    | 1  | 4.67 | 3 |
|                                                                        |        | R.IEIAQKHPDIY@AVPIK.A                     | Y1095      | N              | C | 2                       | 1    | 1  | 3.32 | 3 |
| <b>CYTOSKELETON: ACTIN-ASSOCIATED</b>                                  |        |                                           |            |                |   |                         |      |    |      |   |
| <b>Actins and actin-related proteins; Regulators of actin assembly</b> |        |                                           |            |                |   |                         |      |    |      |   |
| Actin, alpha skeletal muscle (Beta-actin) (Gamma-actin)                | P68134 | M.VMGQKDSY@VGDEAQSKRGIL.T                 | Y55        | N              | C | 12                      | 1    | 1  | 4.38 | 3 |
|                                                                        |        | K.IWHHTFY@NELR.V                          | Y93        | N              | C | 1,2,3,4,6,8,9,10        | 11   | 12 | 3.35 | 3 |
|                                                                        |        | K.EKLC*Y@VALDFENEM#ATAASSSSLEK.S          | Y220       | N              | U | 1,4,8,10                | 1    | 4  | 2.91 | 2 |
| K.EKLC*Y@VALDFENEM#ATAASSSSLEK.S                                       | Y220   |                                           |            | 4              | 4 |                         | 4.88 | 3  |      |   |
| Actin, cytoplasmic 1 (Beta-actin)                                      | P70514 | K.EKLC*Y@VALDFEQEMATAASSSSLEK.S           | Y218       | N              | U | 2                       | 1    | 1  | 4.08 | 3 |
| Beta-centractin                                                        | Q8R5C5 | R.TTGVLDSGDGVTHAVPIY@EGFAMPHSIMR.V        | Y171       | Y              | U | 1,2,3                   | 3    | 3  | 5.73 | 3 |
| Actin-like protein 2 -- Arp2                                           | P61161 | K.HLWDY@TFGPEK.L                          | Y91        | N*             | U | 2,3,5,6,7,8,9,10        | 8    | 13 | 3.37 | 2 |
|                                                                        |        | K.HLWDY@TFGPEKLNDR.N                      | Y91        |                |   | 1,2,7,9,10              | 5    |    | 3.97 | 3 |
| Actin-like protein 3 - Arp3                                            | Q99JY9 | L.RAEPEDHY@F.L                            | Y108       | N*             | U | 11                      | 1    | 1  | 1.87 | 2 |
| Actin-related protein 2/3 complex subunit 3 -- p21-ARC                 | Q9JM76 | F.KGPAPRETKDTDIVDEAIY@Y.F                 | Y46        | Y              | U | 17                      | 1    | 13 | 3.26 | 3 |
|                                                                        |        | F.KGPAPRETKDTDIVDEAIY@YF.K                | Y46        |                |   | 11,13,15,16,18          | 5    |    | 3.75 | 3 |
|                                                                        |        | K.DTDIVDEAIY@YF.K.A                       | Y46        |                |   | 1,5,7,8,9,10            | 6    |    | 4.59 | 2 |
|                                                                        |        | Q.FKGPAPRETKDTDIVDEAIY@Y.F                | Y46        |                |   | 17                      | 1    |    | 3.47 | 3 |
| Adenylyl cyclase-associated protein 1 -- CAP1                          | P40124 | R.LEAVSHTSDMHC*GY@GDSPSK.G                | Y30        | N              | U | 1,2,3                   | 3    | 3  | 4.00 | 3 |
| Cofilin-1 non-muscle isoform                                           | P18760 | K.HELQANC*Y@EEVKDR.C                      | Y139       | N              | C | 1,2,3,4,5,7,8,9,10      | 9    | 10 | 5.21 | 3 |
| K.LTGIKHELQANC*Y@EEVKDR.C                                              | Y139   |                                           |            | 2              | 1 |                         | 4.74 | 3  |      |   |
| Src substrate cortactin                                                | Q60598 | F.KAEPYRGSEPEPEY@SIEAAGIPEAGSQQL.T        | Y442       | N              | U | 11,12,16,17,18          | 6    | 6  | 3.86 | 3 |
|                                                                        |        | L.TYTSEPVY@ETTEAPGHY.Q                    | Y466       | N              | C | 11,12,15,16,17,18       | 1    | 16 | 3.15 | 3 |
|                                                                        |        | Y.TSEPVY@ETTEAPGHY.Q                      | Y466       |                |   | 11,12,13,14,15,16,17,18 | 6    |    | 4.86 | 2 |
|                                                                        |        |                                           |            |                | 1 |                         | 3.97 | 3  |      |   |
|                                                                        |        |                                           |            |                | 8 |                         | 3.51 | 2  |      |   |
| Cytoplasmic FMR1 interacting protein 1                                 | Q7TMB8 | K.C*NEQPNRVEIY@EK.T                       | Y108       | N*             | U | 1,2                     | 2    | 2  | 3.16 | 3 |
| Coronin-1C                                                             | Q9WUM4 | R.YFEITDESPY@VHYLNTFSSKEPQR.G             | Y301       | N*             | U | 10                      | 1    | 1  | 5.75 | 3 |
| N-WASP: Neural Wiskott-Aldrich syndrome protein                        | Q91YD9 | K.VIY@DFIEK.T                             | Y253       | N              | C | 2                       | 1    | 1  | 2.40 | 2 |

|                                                          |         |                                                                                                           |                              |    |   |                                                   |                        |             |                                      |                       |
|----------------------------------------------------------|---------|-----------------------------------------------------------------------------------------------------------|------------------------------|----|---|---------------------------------------------------|------------------------|-------------|--------------------------------------|-----------------------|
| Twinfilin-1                                              | Q91YR1  | R.KIEIDNGDELTAFLY@DEVHPK.Q                                                                                | Y309                         | N  | U | 1,2,5,8                                           | 4                      | 4           | 6.27                                 | 3                     |
| Twinfilin-2                                              | Q9Z0P5  | K.KIEIDGGAELTAFLY@DEVHPK.Q                                                                                | Y309                         | N  | U | 2,3,8                                             | 3                      | 3           | 5.85                                 | 3                     |
| Vasodilator-stimulated phosphoprotein -- VASP            | P70460  | F.SRVQIY@HNPTANSF.R<br>R.VQIY@HNPTANSF.R.V                                                                | Y39<br>Y39                   | N  | C | 11,12<br>2,3,4,7                                  | 2<br>3<br>2            | 7           | 4.02<br>3.28<br>4.30                 | 2<br>3<br>2           |
| WD-repeat protein 1 -- Actin interacting protein 1, AIP1 | O88342  | F.IYDGGTGEKVC*ALGESKAHDGGIY@AISW.S<br>K.AHDGGIY@AISWSPDSTHLLSASGDK.T<br>K.AHDGGIY@AISWSPDSTHLLSASGDKTSK.I | Y237<br>Y237<br>Y237         | N  | C | 11<br>1,2,3,4,5,6,7,8,9,10<br>1,2,4,5,7,9,10      | 1<br>10<br>7           | 18          | 3.26<br>6.03<br>5.84                 | 3<br>3<br>3           |
| <b>Other actin-associated proteins</b>                   |         |                                                                                                           |                              |    |   |                                                   |                        |             |                                      |                       |
| Alpha-actinin 1                                          | Q7TPR4  | R.HRPELIDY@GK.L<br>K.AIM#TYVSSFY@HAFSGAQK.A<br><br>K.AIMTYVSSFY@HAFSGAQK.A                                | Y193<br>Y246<br><br>Y246     | N* | U | 2<br>6,7,10<br><br>1,2,3,4,5,6,7,8,9,10           | 1<br>2<br>2<br>2<br>12 | 1<br>18     | 3.60<br>2.87<br>4.47<br>3.10<br>4.96 | 3<br>3<br>2<br>3<br>2 |
| Anillin                                                  | Q8K298  | R.AESADSLGSEDRDLY@SIDAYR.S                                                                                | Y666                         | N  | U | 1,2,3,4,5,6,7,8,9,10                              | 10                     | 10          | 5.45                                 | 3                     |
| Calponin-3                                               | Q9DAW9  | Y.HGEYDDY@PREY.Q<br>Y.HGEYDDY@PREY@QYGDQIDY.-                                                             | Y316<br>Y320                 | Y  | C | 11,12<br>11,15,17,18                              | 2<br>4                 | 2<br>4      | 3.52<br>4.51                         | 2<br>3                |
| Filamin-B                                                | Q80X90  | K.GFLDGVY@SFEYYPSTPGK.Y<br>K.QKGLDGVY@SFEYYPSTPGK.Y<br>M.KSRMDGTY@AC*SY.T<br>R.MDGTY@AC*SYTPLK.A          | Y511<br>Y511<br>Y704<br>Y704 | Y  | U | 1,2,3,5,6,7,8,9,10<br>1,3,5,6,9,10<br>11<br>1,2,4 | 11<br>6<br>1<br>3      | 17<br>4     | 5.07<br>4.29<br>2.78<br>3.63         | 2<br>3<br>2<br>2      |
| Girdin                                                   | Q5SNZ0  | K.TEDAY@TISSAGKPTSTQG.I<br>L.RTGPKTEDAY@TISSAGKPTSTQ.G                                                    | Y1739<br>Y1739               | N  | U | 2<br>11                                           | 1<br>1                 | 2           | 3.41<br>4.91                         | 3<br>3                |
| LIM and SH3 domain protein 1 -- LASP-1                   | Q61792  | H.HIPTSAPVY@QQPQQQM.T                                                                                     | Y173                         | N  | C | 11                                                | 1                      | 1           | 4.60                                 | 2                     |
| Moesin                                                   | P26041  | K.EGILNDDIY@C*PPETAVALASYAVQSK.Y                                                                          | Y115                         | N* | U | 5                                                 | 1                      | 1           | 3.53                                 | 3                     |
| Myosin-9                                                 | Q8VDD5  | R.HEMPPHIY@AITDTAYR.S                                                                                     | Y150                         | N* | U | 1                                                 | 1                      | 1           | 3.61                                 | 3                     |
| Myosin-10                                                | Q61879  | R.AVIY@NPATQADWTAK.K<br>Y.LFVDRAVIY@NPATQADW.T                                                            | Y22<br>Y22                   | N* | U | 2,4<br>11                                         | 2<br>1                 | 3           | 4.11<br>2.41                         | 2<br>2                |
| PDZ and LIM domain protein 1                             | O70400  | R.VITNQYNSPTGLY@SSENISNFNNAVESK.T                                                                         | Y148                         | N  | U | 2                                                 | 1                      | 1           | 4.00                                 | 3                     |
| Profilin-1                                               | P10924  | K.C*Y@EMASHLR.R                                                                                           | Y128                         | N  | U | 1,2,3                                             | 3                      | 3           | 2.96                                 | 3                     |
| Profilin-2                                               | Q9J JV2 | K.SQGGEPTY@NVAVGR.A                                                                                       | Y98                          | N* | U | 2                                                 | 1                      | 1           | 3.75                                 | 2                     |
| Septin-2                                                 | P42208  | K.QQPTQFINPETPGY@VGFANLPNQVHR.K                                                                           | Y17                          | N  | C | 2,4,5,6,7,8,10                                    | 8                      | 8           | 5.24                                 | 3                     |
| Septin-7                                                 | O55131  | K.NLEGY@VGFANLPNQVYR.K<br>R.KLAAVTY@NGVDNNK.N<br>R.KLAAVTY@NGVDNNKNK.G                                    | Y29<br>Y318<br>Y318          | N* | U | 2<br>4<br>1                                       | 1<br>1<br>1            | 1<br>2      | 4.77<br>2.56<br>3.73                 | 2<br>2<br>3           |
| Synaptopodin                                             | Q8CC35  | R.TPPASLY@HGYPENGLRPEPTK.Q                                                                                | Y775                         | Y  | U | 2,3                                               | 3                      | 3           | 4.07                                 | 3                     |
| <b>CYTOSKELETON: MICROTUBULE-ASSOCIATED</b>              |         |                                                                                                           |                              |    |   |                                                   |                        |             |                                      |                       |
| Tubulin alpha-1 chain                                    | P68369  | F.MVDNEAIY@DIC*RR.N<br>F.MVDNEAIY@DIC*.R<br>F.MVDNEAIY@DIC*RRNLDIERPTY.T                                  | Y210<br>Y210<br>Y210         | N* | U | 11<br>14<br>11,13,16                              | 1<br>1<br>3            | 5           | 3.34<br>2.34<br>3.38                 | 2<br>2<br>3           |
| Tubulin beta-3 chain                                     | Q9ERD7  | Y.C*IDNEALY@DIC*.F.R<br>K.NSSY@FVEWIPNNVK.V                                                               | Y208<br>Y340                 | Y  | U | 11,16,17,18<br>1,2                                | 5<br>2                 | 5<br>2      | 3.10<br>3.32                         | 2<br>2                |
| CLIP-associating protein 2 -- CLASP2                     | Q8BRT1  | R.DYNPY@NYSDSISPFNK.S                                                                                     | Y1014                        | N* | U | 1,2,3,4,5,6,7,8,9,10                              | 11                     | 11          | 4.62                                 | 2                     |
| Dynein heavy chain, cytosolic                            | Q9JHU4  | R.YQVGVHY@ELTEEEKFYR.N                                                                                    | Y1008                        | N* | U | 2,3                                               | 2                      | 2           | 4.70                                 | 3                     |
| Kinesin light chain 1                                    | O88447  | K.DGSFAFGEY@GGWYK.A<br>K.QKDGSAFGEY@GGWYK.A                                                               | Y444<br>Y444                 | Y  | U | 1,2,3,7,10<br>1                                   | 5<br>1                 | 6           | 3.48<br>3.20                         | 2<br>3                |
| Kinesin light chain 2                                    | Q91YS4  | R.DSAPYGEY@GSWYK.A                                                                                        | Y434                         | N* | U | 9                                                 | 1                      | 1           | 2.92                                 | 2                     |
| Kinesin-associated protein 3 -- KAP3                     | P70188  | R.PATAYGFRPDEPY@YYSFGSR.-<br>R.PATAYGFRPDEPY@YYSFGSR.-<br>R.PATAYGFRPDEPY@YYSFGSR.-                       | Y786<br>Y787<br>Y788         | Y  | U | 2,4<br>2,3,5,6,7,8<br>1,9,10                      | 2<br>6<br>3            | 2<br>6<br>3 | 4.19<br>4.61<br>5.10                 | 3<br>3<br>3           |

|                                                                  |                   |                                                                                                                                                                                                                                                                            |                                                                                           |                                                      |                                                   |                                                                                                                |                                                      |                                                |                                                                                      |                                                     |
|------------------------------------------------------------------|-------------------|----------------------------------------------------------------------------------------------------------------------------------------------------------------------------------------------------------------------------------------------------------------------------|-------------------------------------------------------------------------------------------|------------------------------------------------------|---------------------------------------------------|----------------------------------------------------------------------------------------------------------------|------------------------------------------------------|------------------------------------------------|--------------------------------------------------------------------------------------|-----------------------------------------------------|
| Kinesin family member 11                                         | Q6P9P6            | R.SPNEVY@TWEEDPLAGIIPR.T                                                                                                                                                                                                                                                   | Y124                                                                                      | Y                                                    | U                                                 | 1,2                                                                                                            | 2                                                    | 2                                              | 5.01                                                                                 | 2                                                   |
| Microtubule-associated protein 1B -- MAP 1B                      | P14873            | K.VLSPLRS@PPLLGSSESPY@EDFLSADSK.V<br>R.SPPLLGSESPY@EDFLSADSK.V                                                                                                                                                                                                             | Y1405<br>Y1405                                                                            | N*                                                   | U                                                 | 2,7,8<br>9                                                                                                     | 3<br>1                                               | 4                                              | 4.92<br>4.85                                                                         | 3<br>2                                              |
| Microtubule-associated protein 1B -- isoform                     | UPI0000021<br>C8B | R.RTHDVGYY@YEKTER.T                                                                                                                                                                                                                                                        | Y1901                                                                                     | N*                                                   | U                                                 | 1,2                                                                                                            | 2                                                    | 2                                              | 3.18                                                                                 | 3                                                   |
| Microtubule-associated protein 4 -- MAP 4                        | P27546            | F.TERDNPSSESY@GMLPC*DSF.A                                                                                                                                                                                                                                                  | Y176                                                                                      | Y                                                    | U                                                 | 11,12,15                                                                                                       | 3                                                    | 3                                              | 4.26                                                                                 | 2                                                   |
| Nuclear distribution protein nudE homolog 1 -- NudE              | Q9CZA6            | R.NFMY@DQSPSR.T                                                                                                                                                                                                                                                            | Y279                                                                                      | N                                                    | U                                                 | 3                                                                                                              | 1                                                    | 1                                              | 2.20                                                                                 | 2                                                   |
| PREDICTED: similar to centrosome spindle pole associated protein | UPI0000D65<br>977 | R.TPYDDAY@YFYGAR.N                                                                                                                                                                                                                                                         | Y468                                                                                      | Y                                                    | U                                                 | 4,6,8,10                                                                                                       | 4                                                    | 4                                              | 3.78                                                                                 | 2                                                   |
| Platelet-activating factor acetylhydrolase IB alpha subunit      | P63005            | R.SNGYEEAY@SVFKK.E                                                                                                                                                                                                                                                         | Y27                                                                                       | N*                                                   | U                                                 | 1,2                                                                                                            | 2                                                    | 2                                              | 3.04                                                                                 | 2                                                   |
| RCC2 protein                                                     | Q8BK67            | R.VFSWGFGGY@GR.L                                                                                                                                                                                                                                                           | Y357                                                                                      | N*                                                   | U                                                 | 2,9,10                                                                                                         | 3                                                    | 3                                              | 2.97                                                                                 | 2                                                   |
| <b>CYTOSKELETON: OTHER</b>                                       |                   |                                                                                                                                                                                                                                                                            |                                                                                           |                                                      |                                                   |                                                                                                                |                                                      |                                                |                                                                                      |                                                     |
| Plectin 1                                                        | Q6S394            | Y.VSSLY@DAMPRVPGAQDGVANEL.Q<br>K.AVTGYRDPY@SGQSVSLFQALK.K<br>K.AVTGYRDPY@SGQSVSLFQALK.K.G<br>R.ARQEEVY@SELQAR.E<br><br>R.LTAEDLY@EAR.I<br>R.QQNLASV@DYVVR.R<br>R.AVTGKDPY@SGK.L<br>R.LLEAAAQSSKGY@YSPYSVSGSGSTAGSR.T<br>K.GYSPY@S@VSGSGSTAGSR.T<br>K.GYSPY@S@VSGSGSTAGSR.T | Y288<br>Y3134<br>Y3134<br>Y3250<br><br>Y3678<br>Y3665<br>Y4043<br>Y4499<br>Y4503<br>Y4503 | N*<br>Y<br><br>Y<br><br>Y<br>N*<br>N*<br>N<br>N<br>N | U<br>U<br><br>U<br><br>U<br>U<br>U<br>U<br>U<br>U | 11,14<br>9<br>2,3,5,6,7,8,9,10<br>1,2,3,4,5,7,8,9,10<br><br>1,3<br>2,5<br>9,10<br>2<br>7<br>1,3,4,5,6,7,8,9,10 | 2<br>1<br>8<br>6<br>11<br>2<br>2<br>2<br>1<br>1<br>9 | 2<br>9<br><br>17<br><br>2<br>2<br>2<br>1<br>10 | 2.63<br>3.78<br>5.83<br>4.73<br>4.37<br>2.66<br>2.10<br>3.50<br>5.12<br>2.85<br>4.99 | 3<br>3<br>3<br>3<br>2<br>2<br>2<br>2<br>3<br>2<br>2 |
| Protein 4.1                                                      | P48193            | K.VSLDDTVY@EC*VVEK.H                                                                                                                                                                                                                                                       | Y223                                                                                      | N*                                                   | U                                                 | 8                                                                                                              | 1                                                    | 1                                              | 3.57                                                                                 | 2                                                   |
| Spectrin beta chain, brain 1                                     | Q62261            | L.KIVSSNDVGHDEY@STQ.S                                                                                                                                                                                                                                                      | Y777                                                                                      | N*                                                   | U                                                 | 11                                                                                                             | 1                                                    | 1                                              | 3.86                                                                                 | 2                                                   |
| Vimentin                                                         | P20152            | R.TY@SLGSALRPSTSR.S<br>L.RPSTSRSLY@SSSPGGAY.V<br>R.SLY@SSS@PGGAYVTR.S<br>R.SLY@SSSPGGAYVTR.S<br>S.RSLY@SSSPGGAY.V<br>S.TSRSLY@SSSPGGAY.V                                                                                                                                   | Y37<br>Y52<br>Y52<br>Y52<br>Y52<br>Y52                                                    | N*<br>N<br><br>N<br>N<br>N                           | U<br>C<br><br>U<br>U<br>U                         | 2<br>11<br>10<br>1,2,3,4,5,6,7,8,9,10<br>11<br>11,12,17                                                        | 1<br>1<br>1<br>11<br>1<br>3                          | 1<br>17<br><br>1<br>1                          | 2.73<br>3.14<br>3.24<br>4.32<br>2.66<br>3.50                                         | 3<br>2<br>2<br>2<br>2<br>2                          |
| <b>TRAFFICKING/TRANSPORT</b>                                     |                   |                                                                                                                                                                                                                                                                            |                                                                                           |                                                      |                                                   |                                                                                                                |                                                      |                                                |                                                                                      |                                                     |
| <b>Vesicle transport</b>                                         |                   |                                                                                                                                                                                                                                                                            |                                                                                           |                                                      |                                                   |                                                                                                                |                                                      |                                                |                                                                                      |                                                     |
| Adapter-related protein complex 3 mu 1 subunit                   | Q9JKC8            | K.SVWSQSYC*DY@FFEAQEK.A                                                                                                                                                                                                                                                    | Y31                                                                                       | N*                                                   | U                                                 | 2,3,4                                                                                                          | 3                                                    | 3                                              | 4.63                                                                                 | 2                                                   |
| Clathrin heavy chain                                             | Q68FD5            | R.ALEHFTDLY@DIKR.A<br>R.FLRENPY@YDSR.V                                                                                                                                                                                                                                     | Y634<br>Y899                                                                              | N*<br>N                                              | U<br>U                                            | 1,2,3,4,5,7<br>1,2,3,4,8                                                                                       | 6<br>5                                               | 6<br>5                                         | 5.13<br>3.20                                                                         | 3<br>3                                              |
| Coatamer protein complex subunit alpha                           | Q8BTF0            | R.VKGNVY@C*LDR.E                                                                                                                                                                                                                                                           | Y 579                                                                                     | N*                                                   | U                                                 | 1,3                                                                                                            | 2                                                    | 2                                              | 2.33                                                                                 | 2                                                   |
| Coatamer beta subunit                                            | Q9JIF7            | K.LVTEMGTY@ATQSALSSSRPTKK.E                                                                                                                                                                                                                                                | Y521                                                                                      | N*                                                   | U                                                 | 1,2                                                                                                            | 2                                                    | 2                                              | 3.12                                                                                 | 3                                                   |
| Coatamer beta' subunit                                           | O55029            | K.GVNC*IDYY@SGGDKPYLISGADDR.L                                                                                                                                                                                                                                              | Y194                                                                                      | Y                                                    | U                                                 | 3,5                                                                                                            | 2                                                    | 2                                              | 4.15                                                                                 | 3                                                   |
| HECT domain and RCC1-like domain-containing protein 2 -- Herc2   | Q4U2R1            | R.SRTPLDKDLINTGIY@ESSGK.Q<br>R.TPLDKDLINTGIY@ESSGK.Q                                                                                                                                                                                                                       | Y999<br>Y999                                                                              | Y                                                    | U                                                 | 2,8,9<br>10                                                                                                    | 3<br>1                                               | 4                                              | 4.43<br>4.02                                                                         | 3<br>3                                              |
| Intersectin 2                                                    | Q9Z0R6            | R.GEPEALY@AAVTK.K                                                                                                                                                                                                                                                          | Y 921                                                                                     | N                                                    | C                                                 | 1,2,3,4                                                                                                        | 9                                                    | 9                                              | 3.16                                                                                 | 2                                                   |
| Lysosomal trafficking regulator                                  | P97412            | R.AVWYDPIY@YPTSWQLDPTGPNR.E                                                                                                                                                                                                                                                | Y 2929                                                                                    | Y                                                    | U                                                 | 1                                                                                                              | 1<br>1                                               | 2                                              | 3.56<br>3.96                                                                         | 3<br>2                                              |
| SEC24 related gene family, member B                              | Q80ZX0            | K.MTSLPLDSQC*DSY@YSRPTYVPTQNSGTPSSAN<br>QPGAQMYGR.G<br>R.LDDRIVY@AMC*QMK.S                                                                                                                                                                                                 | Y79<br>Y1083                                                                              | Y<br>N*                                              | U<br>U                                            | 4,10<br>2                                                                                                      | 2<br>1                                               | 2<br>1                                         | 5.30<br>3.34                                                                         | 3<br>3                                              |
| SH3-containing GRB2-like protein 1                               | Q62419            | K.ALY@DFEPENDGELGFR.E                                                                                                                                                                                                                                                      | Y315                                                                                      | N                                                    | U                                                 | 2                                                                                                              | 1                                                    | 1                                              | 4.61                                                                                 | 2                                                   |
| Sorting nexin-9                                                  | Q91VH2            | K.IAIVGDY@GPMWVYPTSTFDC*VVADPR.K<br>L.AKPKEKIAIVGDY@GPM#W<br>L.AKPKEKIAIVGDY@GPM.W                                                                                                                                                                                         | Y239<br>Y239<br>Y239                                                                      | N                                                    | U                                                 | 5<br>11,16,17,18<br>11,12,13,14,15,16,17,18                                                                    | 1<br>4<br>7<br>4                                     | 16                                             | 3.29<br>3.96<br>3.29<br>4.18                                                         | 3<br>3<br>3<br>2                                    |



|                                                         |        |                                                                                                                                                                                                                                                                                                                  |                                                                                              |               |             |                                                                                                                                                          |                                                     |                  |                                                                                      |                                                     |
|---------------------------------------------------------|--------|------------------------------------------------------------------------------------------------------------------------------------------------------------------------------------------------------------------------------------------------------------------------------------------------------------------|----------------------------------------------------------------------------------------------|---------------|-------------|----------------------------------------------------------------------------------------------------------------------------------------------------------|-----------------------------------------------------|------------------|--------------------------------------------------------------------------------------|-----------------------------------------------------|
| Sorting nexin 17                                        | Q8R0N8 | R.KSYWDSAY@DDVDMENR.V                                                                                                                                                                                                                                                                                            | Y210                                                                                         | Y             | U           | 1,2,3                                                                                                                                                    | 3<br>3                                              | 6                | 4.37<br>5.32                                                                         | 3<br>2                                              |
| Transitional endoplasmic reticulum ATPase -- TER ATPase | Q01853 | K.VVETDPSPY@C*IVAPDTVHC*EGEPIKR.E<br>R.GILLY@GPPGTGK.T                                                                                                                                                                                                                                                           | Y172<br>Y243                                                                                 | N*<br>N*      | U<br>U      | 1,3<br>2                                                                                                                                                 | 2<br>1                                              | 2<br>1           | 3.41<br>2.72                                                                         | 3<br>2                                              |
| <b>Nucleocytoplasmic transport</b>                      |        |                                                                                                                                                                                                                                                                                                                  |                                                                                              |               |             |                                                                                                                                                          |                                                     |                  |                                                                                      |                                                     |
| GTP-binding nuclear protein Ran                         | P62827 | K.NLQY@YDISAK.S<br>R.KKNLQY@YDISAK.S<br>K.NLQYY@DISAK.S<br>K.SNY@NFEKPFLLAR.K                                                                                                                                                                                                                                    | Y145<br>Y145<br>Y146<br>Y154                                                                 | N*<br>N*<br>N | U<br>U<br>U | 2,3,4,6,7,10<br>1,3<br>2,3,4,5,9<br>7                                                                                                                    | 6<br>2<br>6<br>1                                    | 8<br>2<br>6<br>1 | 2.94<br>2.92<br>3.13<br>2.64                                                         | 2<br>3<br>2<br>3                                    |
| Importin-9                                              | Q91YE6 | R.VKGEEIY@SMDEGIR.T                                                                                                                                                                                                                                                                                              | Y888                                                                                         | Y             | U           | 1,2,3,4,5,6,7,10                                                                                                                                         | 4<br>7                                              | 11               | 4.13<br>4.03                                                                         | 3<br>2                                              |
| RAE1 RNA export 1 homolog                               | Q8C570 | R.SNGTNTSAPQDIY@AVNGIAFHPVHGLTAVGSD<br>GR.F                                                                                                                                                                                                                                                                      | Y274                                                                                         | N*            | U           | 1,3,5,8                                                                                                                                                  | 4                                                   | 4                | 4.76                                                                                 | 3                                                   |
| Ran-binding protein 2                                   | Q9ERU9 | R.GDDY@FNYNVQQTSTNPPLPEPGYFTKPLVAHA<br>SR.S<br>K.EGPY@WNC*NSC*SFK.N                                                                                                                                                                                                                                              | Y960<br>Y1349                                                                                | N*<br>N*      | U<br>U      | 2,3<br>7                                                                                                                                                 | 2<br>1                                              | 2<br>1           | 5.10<br>2.65                                                                         | 3<br>2                                              |
| <b>Other transport</b>                                  |        |                                                                                                                                                                                                                                                                                                                  |                                                                                              |               |             |                                                                                                                                                          |                                                     |                  |                                                                                      |                                                     |
| none                                                    |        |                                                                                                                                                                                                                                                                                                                  |                                                                                              |               |             |                                                                                                                                                          |                                                     |                  |                                                                                      |                                                     |
| <b>METABOLIC AND BIOSYNTHETIC ENZYMES</b>               |        |                                                                                                                                                                                                                                                                                                                  |                                                                                              |               |             |                                                                                                                                                          |                                                     |                  |                                                                                      |                                                     |
| <b>Glycolytic enzymes</b>                               |        |                                                                                                                                                                                                                                                                                                                  |                                                                                              |               |             |                                                                                                                                                          |                                                     |                  |                                                                                      |                                                     |
| Alpha enolase (beta-enolase) (gamma enolase)            | P17182 | R.GNPTVEVDLY@TAK.G<br>F.DSRGNPTVEVDLY@TAKGLF.R<br>F.DSRGNPTVEVDLY@TAKGLF.R.A<br>F.RAAVPSGASTGIY@EAL.E<br>F.RAAVPSGASTGIY@EAL.L.R<br>R.AAVPSGASTGIY@EAL.L.R.D<br><br>F.RAAVPSGASTGIY@EAL.L.RDNDKTRF.M<br>R.AAVPSGASTGIY@EAL.L.RDNDK.T<br>R.IGAEVY@HNLK.N                                                          | Y24<br>Y24<br>Y24<br>Y43<br>Y43<br>Y43<br><br>Y43<br>Y43<br>Y188                             | N<br>N<br>N   | C<br>C<br>C | 1,2,3,4,5,7,8,9,10<br>11,12,13,14,16,17,18<br>11,12,13<br>11,12,14,16,18<br>11,12,13,14,16,17,18<br>1,2,3,4,5,6,7,8,9,10<br><br>11,12,13,15,16<br>3<br>2 | 73<br>24<br>3<br>6<br>16<br>11<br>40<br>7<br>1<br>1 | 100<br>81        | 4.12<br>5.57<br>5.81<br>3.66<br>3.64<br>3.99<br>5.59<br>4.46<br>4.87<br>2.09         | 2<br>2<br>3<br>2<br>2<br>3<br>2<br>3<br>2<br>2      |
| GAPDH: Glyceraldehyde-3-phosphate dehydrogenase         | P16858 | F.VKLISWYDNEY@GY.S<br>K.LISWYDNEY@GYSNR.V<br><br>L.ISWYDNEY@GY.S<br>L.ISWYDNEY@GYSNRVVDL.M                                                                                                                                                                                                                       | Y315<br>Y315<br><br>Y315<br>Y315                                                             | N<br>N        | C<br>C      | 11,16,17,18<br>1,2,3,4,5,6,7,8,9,10<br><br>17<br>11,18                                                                                                   | 4<br>5<br>29<br>1<br>2                              | 41               | 3.99<br>4.50<br>4.77<br>3.12<br>4.01                                                 | 2<br>3<br>2<br>2<br>2                               |
| L-lactate dehydrogenase A chain                         | P06151 | W.KEVHKQVVDAYS@EVIK.L                                                                                                                                                                                                                                                                                            | Y238                                                                                         | N             | U           | 11,12,14                                                                                                                                                 | 3                                                   | 3                | 3.85                                                                                 | 3                                                   |
| 6-phosphofructokinase, liver type                       | P12382 | K.C*HEHYTFELY@NLYSSEGR.G                                                                                                                                                                                                                                                                                         | Y639                                                                                         | N*            | U           | 1,6,7,8,9,10                                                                                                                                             | 6                                                   | 6                | 4.55                                                                                 | 3                                                   |
| Phosphoglycerate mutase 1                               | Q9DBJ1 | F.SGWY@DADLSPAGHEEAKRGGQAL.R<br>F.SGWY@DADLSPAGHEEAKRGGQ.A<br>R.FSGWY@DADLSPAGHEEAK.R<br><br>R.FSGWY@DADLSPAGHEEAKR.G                                                                                                                                                                                            | Y25<br>Y25<br>Y25<br><br>Y25                                                                 | N<br>N        | C<br>C      | 12<br>14<br>1,2,3,4,5,6,9,10<br><br>1,2,3,4,5,6,7,9,10                                                                                                   | 1<br>1<br>5<br>5<br>10<br>1                         | 23               | 4.24<br>4.08<br>4.50<br>5.33<br>4.39<br>3.07                                         | 3<br>3<br>3<br>2<br>3<br>2                          |
| Pyruvate kinase, isozyme M2                             | P52480 | R.EATESFASDPILY@RPVAVALDTK.G<br>R.EATESFASDPILY@RPVAVALDTKGPEIR.T<br>Y.HAETIKNVREATESFASDPILY@RPVAVAL.D<br>K.ITLDNAY@MEKC*DENILWLDYK.N<br>L.IAREAAIY@HLQL.F<br>L.IAREAAIY@HL.Q<br>L.IAREAAIY@HLQL.F.E<br>L.IAREAAIY@HLQL.FEEL.R<br>M.QHLIAREAAIY@HLQL.FEEL.R<br>R.EAAIY@HLQL.FEEL.R.R<br>R.EAAIY@HLQL.FEEL.R.R.L | Y104<br>Y104<br>Y104<br>Y147<br>Y389<br>Y389<br>Y389<br>Y389<br>Y389<br>Y389<br>Y389<br>Y389 | N<br>N<br>N   | U<br>U<br>C | 1,3,4,5,7,8<br>1,3<br>11<br>2,4,8<br>11<br>14<br>11,14<br>11,13,14<br>13<br>7,8,10<br>1,4,7,9,10                                                         | 6<br>2<br>1<br>3<br>1<br>1<br>2<br>3<br>1<br>3<br>6 | 9<br>3<br>17     | 4.63<br>4.28<br>5.13<br>4.85<br>3.48<br>2.29<br>3.63<br>4.68<br>3.31<br>3.25<br>3.10 | 3<br>3<br>3<br>3<br>2<br>2<br>2<br>2<br>3<br>3<br>3 |
| <b>Other metabolic/biosynthetic enzymes</b>             |        |                                                                                                                                                                                                                                                                                                                  |                                                                                              |               |             |                                                                                                                                                          |                                                     |                  |                                                                                      |                                                     |
| ADP/ATP translocase 2                                   | P51881 | R.AAYFGIY@DTAK.G                                                                                                                                                                                                                                                                                                 | Y194                                                                                         | N*            | U           | 1                                                                                                                                                        | 1                                                   | 1                | 2.76                                                                                 | 2                                                   |
| ATP citrate lyase                                       | Q91V92 | R.TTDGVY@EGVAIGGDRYPGSTFMDHVL.R.Y<br>R.TTDGVY@EGVAIGGDRYPGSTFMDHVL.R.Y                                                                                                                                                                                                                                           | Y 672<br>Y 672                                                                               | N             | U           | 1,2,3,4,5,8,10<br>2                                                                                                                                      | 8<br>1                                              | 9                | 4.21<br>3.87                                                                         | 3<br>3                                              |
| Aldo-keto reductase family 1 member C18                 | Q8K023 | K.IELNDGHSIPVLGFGTY@ATEEHLK.K                                                                                                                                                                                                                                                                                    | Y24                                                                                          | N*            | U           | 4,6,7                                                                                                                                                    | 3                                                   | 3                | 6.16                                                                                 | 3                                                   |
| Aldo-keto reductase family 1, member B3                 | Q5U415 | R.HIDC*AQVY@QNEK.E<br>R.HIDC*AQVY@QNEKEGVVALQEK.L                                                                                                                                                                                                                                                                | Y49                                                                                          | N*            | U           | 1<br>1,2,3,5                                                                                                                                             | 1<br>4                                              | 5                | 3.57<br>5.25                                                                         | 2<br>3                                              |

|                                                           |        |                                                                                                                                                                                                |                                                                          |    |   |                                                                                                     |                                                |         |                                                                                      |                                                     |
|-----------------------------------------------------------|--------|------------------------------------------------------------------------------------------------------------------------------------------------------------------------------------------------|--------------------------------------------------------------------------|----|---|-----------------------------------------------------------------------------------------------------|------------------------------------------------|---------|--------------------------------------------------------------------------------------|-----------------------------------------------------|
| Aldose reductase-related protein 2                        | P45377 | R.AC*LLPETVNMEEYPYDAEY@-<br>W.RAC*LLPETVNMEEYPYDAEY@-                                                                                                                                          | Y315<br>Y315                                                             | N* | U | 7,9,10<br>16                                                                                        | 3<br>1                                         | 4       | 3.86<br>4.63                                                                         | 2<br>2                                              |
| Adenylosuccinate synthetase, non-muscle isozyme           | P46664 | K.DGVY@FLYEALHGPPK.K<br>K.DGVY@FLYEALHGPPK.I<br>K.DGVYFLY@EALHGPPK.I                                                                                                                           | Y236<br>Y236<br>Y239                                                     | N* | U | 7,8,9<br>1,3,4,5,6,7,9,10<br>1                                                                      | 3<br>8<br>1                                    | 11      | 3.88<br>4.32<br>2.79                                                                 | 2<br>3<br>3                                         |
| Bifunctional purine biosynthesis protein PURH             | Q9CWJ9 | L.SEDEARVC*MVY@DLYPTLTPLA<br>R.VC*M#VY@DLYPTLTPLAVAYAR.A<br><br>R.VC*MVY@DLYPTLTPLAVAYAR.A<br><br>R.VC*MVYDLY@PTLTPLAVAYAR.A                                                                   | Y290<br>Y290<br><br>Y290<br><br>Y293                                     | N* | C | 11<br>3,4,5,6,7,8,9<br><br>1,2,3,4,5,6,7,8,9,10<br><br>1                                            | 1<br>6<br>8<br>6<br>10<br>1                    | 31      | 3.14<br>5.05<br>5.51<br>4.92<br>4.98<br>4.85                                         | 2<br>3<br>2<br>3<br>2<br>3                          |
| CTP synthase                                              | P70698 | Y.INIDAGTFSFY@EHGEV.F                                                                                                                                                                          | Y53                                                                      | N* | U | 11,12,17                                                                                            | 3                                              | 3       | 4.86                                                                                 | 2                                                   |
| Glycerol-3-phosphate dehydrogenase 2                      | Q8VDT0 | R.FLYY@EMGYK.S                                                                                                                                                                                 | Y601                                                                     | Y  | U | 1,2                                                                                                 | 2                                              | 2       | 2.10                                                                                 | 2                                                   |
| Glucose-6-phosphate 1-dehydrogenase X                     | Q00612 | R.NSYVAGQY@DDAASYK.H<br>R.VQPNEAVY@TK.M<br>L.VIRVQPNEAVY@TKM#M<br>L.VIRVQPNEAVY@TKM.M<br><br>L.VIRVQPNEAVY@TKMM.T<br><br>K.KPGMFFNPEESELDTY@GNRYK.N<br>K.RVGFQYEGTY@K.W<br><br>R.VGFQYEGTY@K.W | Y111<br>Y400<br>Y400<br>Y400<br><br>Y400<br><br>Y423<br>Y506<br><br>Y506 | N* | U | 1,2,3,4,5,7<br>3,4<br>15<br>11,12,13,15,18<br><br>11,12<br><br>9,10<br>6,7,8,9,10<br><br>2,6,7,9,10 | 6<br>2<br>1<br>4<br>3<br>2<br>2<br>2<br>5<br>6 | 6<br>14 | 4.75<br>2.23<br>4.31<br>5.21<br>4.35<br>4.41<br>3.60<br>6.48<br>3.02<br>3.66<br>3.08 | 2<br>2<br>3<br>3<br>2<br>3<br>2<br>3<br>3<br>2<br>2 |
| Inosine-5'-monophosphate dehydrogenase 2                  | P24547 | L.AATTEAPGEY@FFSDGIRL.K                                                                                                                                                                        | Y400                                                                     | N  | U | 11,12,13,15,16                                                                                      | 5                                              | 5       | 4.32                                                                                 | 2                                                   |
| Phosphoglucomutase 2                                      | Q5RJV4 | K.IALY@ETPTGWK.F                                                                                                                                                                               | Y353                                                                     | N* | U | 2                                                                                                   | 1                                              | 1       | 1.96                                                                                 | 2                                                   |
| Ribonucleoside-diphosphate reductase large subunit        | P07742 | K.KVFSVDMEDLY@NYINPHNGR.H<br>K.KVFSVDM#EDLY@NYINPHNGR.H                                                                                                                                        | Y102<br>Y102                                                             | N* | U | 1,2,3,4,5,9,10<br>7                                                                                 | 7<br>1                                         | 8       | 6.31<br>3.62                                                                         | 3<br>3                                              |
| Serine hydroxymethyltransferase, cytosolic                | P50431 | K.M#LSQPLKDSDAEVY@SIIKK.E<br>K.MLSQPLKDSDAEVY@SIIKK.E                                                                                                                                          | Y28<br>Y28                                                               | N* | C | 2,3,4,5,6,7<br>1,2,3,5,6,7,8,9,10                                                                   | 6<br>10                                        | 16      | 4.89<br>5.78                                                                         | 3<br>3                                              |
| S-adenosylhomocysteine hydrolase                          | Q5M9P0 | K.SKFDNLY@GC*R.E                                                                                                                                                                               | Y193                                                                     | N* | U | 2,5,8                                                                                               | 3                                              | 3       | 3.05                                                                                 | 2                                                   |
| Thioredoxin reductase 1, cytoplasmic                      | Q9JMH6 | K.KVYENAY@GR.F<br><br>K.VVYENAY@GR.F                                                                                                                                                           | Y131<br><br>Y131                                                         | N  | U | 1,2,3,4,5<br><br>1,2,3,4,5                                                                          | 3<br>6<br>6                                    | 15      | 3.69<br>3.55<br>2.63                                                                 | 3<br>2<br>2                                         |
| Thioredoxin reductase 1 [fragment]                        | Q3UEB7 | K.EVYENAY@GR.F                                                                                                                                                                                 | Y131                                                                     | Y  | U | 1,4                                                                                                 | 2                                              | 2       | 3.55                                                                                 | 3                                                   |
| TK: Transketolase                                         | P40142 | K.NM#AEQIIQEIY@SQVQSK.K<br>K.NMAEQIIQEIY@SQVQSK.K                                                                                                                                              | Y275<br>Y275                                                             | N  | C | 8<br>1,2,3,4,5,8,9                                                                                  | 1<br>3<br>6                                    | 10      | 4.06<br>6.04<br>4.76                                                                 | 3<br>3<br>2                                         |
| UDP-glucose 6-dehydrogenase                               | Q70475 | R.INAWNSPTLPIY@EPGLK.E<br>R.INAWNSPTLPIY@EPGLKEVVESC*R.G                                                                                                                                       | Y53<br>Y53                                                               | N* | U | 2<br>2                                                                                              | 1<br>1                                         | 2       | 3.45<br>4.18                                                                         | 2<br>3                                              |
| <b>RNA SYNTHESIS AND PROCESSING</b>                       |        |                                                                                                                                                                                                |                                                                          |    |   |                                                                                                     |                                                |         |                                                                                      |                                                     |
| <b>Transcription machinery and regulation</b>             |        |                                                                                                                                                                                                |                                                                          |    |   |                                                                                                     |                                                |         |                                                                                      |                                                     |
| CCR4-NOT transcription complex subunit 2                  | Q8C5L3 | F.VEGVDSYHDENM#Y@Y.S<br>F.VEGVDSYHDENMY@Y.S<br>K.FVEGVDSYHDENM#Y@YSQSSMFPHR.S<br>K.FVEGVDSYHDENMY@YSQSSMFPHR.S<br>K.FVEGVDSYHDENMY@YSQSSMFPHR.S                                                | Y43<br>Y43<br>Y43<br>Y43<br>Y43                                          | N* | U | 17<br>17,18<br>3<br>3,5,6,7<br>1,2,3,5,6,7,9,10                                                     | 1<br>2<br>1<br>4<br>10                         | 18      | 4.02<br>3.83<br>4.75<br>5.11<br>6.55                                                 | 2<br>2<br>3<br>3<br>3                               |
| DNA-directed RNA polymerase I 40 kDa polypeptide -- RPA40 | P52432 | R.NVHTTDFPGNY@AGYDDAWDQNRFEK.N                                                                                                                                                                 | Y33                                                                      | N  | U | 2                                                                                                   | 1                                              | 1       | 4.78                                                                                 | 3                                                   |
| LIM domains containing protein 1 -- LIMD1                 | Q9QXD8 | K.VFC*EEDFLY@SGFQQSADR.C                                                                                                                                                                       | Y519                                                                     | Y  | U | 1,2,4,6,8,9,10                                                                                      | 4<br>6                                         | 10      | 5.92<br>5.89                                                                         | 3<br>2                                              |
| NF-kappa-B DNA binding subunit p105                       | P25799 | F.TRRLEPVVSDAIY@DSKAPNASNLK.K<br>R.RLEPVVSDAIY@DSKAPNASNLK.I                                                                                                                                   | Y238<br>Y238                                                             | N* | U | 11,12<br>1,2,3,5,7                                                                                  | 2<br>5                                         | 7       | 4.74<br>5.03                                                                         | 3<br>3                                              |
| Polymerase I and transcript release factor -- PTRF        | O54724 | F.KVMIY@QDEVKLPACL.S<br>K.VMIY@QDEVKLPACL.L<br>R.KSFTPDHVY@AR.S<br>K.SFTPDHVY@AR.S                                                                                                             | Y158<br>Y158<br>Y310<br>Y310                                             | N* | C | 12<br>2<br>3,7<br>7                                                                                 | 1<br>1<br>2<br>1                               | 2<br>3  | 4.97<br>3.47<br>3.48<br>2.34                                                         | 3<br>2<br>3<br>2                                    |
| Staphylococcal nuclease domain-containing protein 1       | Q78PY7 | R.ADDADEFY@SR.-                                                                                                                                                                                | Y908                                                                     | N  | U | 8                                                                                                   | 1                                              | 5       | 3.35                                                                                 | 2                                                   |

|                                                                    |        |                                                                                                                                                                                                                                                                                                                                                                                                                    |              |    |   |                      |        |      |              |        |   |      |   |
|--------------------------------------------------------------------|--------|--------------------------------------------------------------------------------------------------------------------------------------------------------------------------------------------------------------------------------------------------------------------------------------------------------------------------------------------------------------------------------------------------------------------|--------------|----|---|----------------------|--------|------|--------------|--------|---|------|---|
|                                                                    |        | R.YGDFRADADEFY@SR-                                                                                                                                                                                                                                                                                                                                                                                                 | Y908         |    |   | 6,7,9,10             | 4      |      | 4.20         | 3      |   |      |   |
| Transcription initiation factor IIE alpha subunit                  | Q9D0D5 | R.FNEQIEPIY@ALLR.E                                                                                                                                                                                                                                                                                                                                                                                                 | Y188         | Y  | U | 6,7                  | 2      | 2    | 4.09         | 2      |   |      |   |
| Transcription elongation factor SPT6                               | Q62383 | K.AAEDDELEEEADWIY@R.N                                                                                                                                                                                                                                                                                                                                                                                              | Y321         | Y  | U | 9,10                 | 2      | 2    | 5.00         | 2      |   |      |   |
| Tripartite motif protein 25                                        | Q61510 | K.FDTIY@QVLVK.K<br>R.VYGKFDTIY@QVLVK.K                                                                                                                                                                                                                                                                                                                                                                             | Y277         | N  | U | 2,7                  | 2      | 9    | 3.32         | 2      |   |      |   |
|                                                                    |        |                                                                                                                                                                                                                                                                                                                                                                                                                    | Y277         |    |   | 1,2,3,4,5,8          | 1      |      | 2.52         | 3      |   |      |   |
|                                                                    |        |                                                                                                                                                                                                                                                                                                                                                                                                                    |              |    |   |                      | 6      |      | 4.10         | 2      |   |      |   |
| <b>DEAD(DEAH)-box helicases</b>                                    |        |                                                                                                                                                                                                                                                                                                                                                                                                                    |              |    |   |                      |        |      |              |        |   |      |   |
| ATP-dependent RNA helicase DDX3X (DDX3Y) (PL10)                    | Q62167 | K.GFY@DKDSSGWSS@SKDKDAYSSFGSR.G<br><br>K.DKDAY@SSFGSR.D<br>W.SSSKDKDAY@SSF.G<br>R.FDDRGRGDY@DGIGGR.G<br>R.GDY@DGIGGR.G<br>R.GDY@DGIGGRGDR.S<br>R.GRGDY@DGIGGR.G<br><br>R.GRGDY@DGIGGRGDR.S<br>K.TAAFLPILSIQY@ADGPGEALR.A<br><br>L.VLAPTRRELAVQIY@EEARKF.S<br>R.VRPC*VYVY@GGAIEGQQIR.D<br>F.VETKKGADSLDFLY@HEGY.A<br><br>K.GADSLDFLY@HEGYAC*TSIHGDR.S<br>K.KGADSLDFLY@HEGYAC*TSIHGDR.S<br>L.VFVETKKGADSLDFLY@HEGY.A | Y52          | N* | U | 2                    | 1      | 1    | 3.20         | 3      |   |      |   |
|                                                                    |        |                                                                                                                                                                                                                                                                                                                                                                                                                    | Y68          | N  | U | 1,2,3,4,5,6,8,9,10   | 9      | 14   | 3.58         | 2      |   |      |   |
|                                                                    |        |                                                                                                                                                                                                                                                                                                                                                                                                                    | Y68          |    |   | 11,12,13,15,17       | 5      |      | 3.10         | 2      |   |      |   |
|                                                                    |        |                                                                                                                                                                                                                                                                                                                                                                                                                    | Y103         | N  | C | 2                    | 1      | 24   | 2.62         | 3      |   |      |   |
|                                                                    |        |                                                                                                                                                                                                                                                                                                                                                                                                                    | Y103         |    |   | 1,2,4,8,10           | 5      |      | 2.80         | 2      |   |      |   |
|                                                                    |        |                                                                                                                                                                                                                                                                                                                                                                                                                    | Y103         |    |   | 1                    | 1      |      | 2.00         | 2      |   |      |   |
|                                                                    |        |                                                                                                                                                                                                                                                                                                                                                                                                                    | Y103         |    |   | 1,2,3,4,5,6,8,10     | 10     |      | 3.44         | 2      |   |      |   |
|                                                                    |        |                                                                                                                                                                                                                                                                                                                                                                                                                    |              |    |   | 1                    |        |      | 2.56         | 3      |   |      |   |
|                                                                    |        |                                                                                                                                                                                                                                                                                                                                                                                                                    | Y103         |    |   | 1,2,4,5,6,10         | 6      |      | 4.16         | 3      |   |      |   |
|                                                                    |        |                                                                                                                                                                                                                                                                                                                                                                                                                    | Y242         | N* | U | 3,5                  | 1      | 2    | 5.29         | 3      |   |      |   |
|                                                                    |        |                                                                                                                                                                                                                                                                                                                                                                                                                    |              |    |   | 1                    |        |      | 5.59         | 2      |   |      |   |
|                                                                    |        |                                                                                                                                                                                                                                                                                                                                                                                                                    |              |    |   | Y282                 | Y      | U    | 11,12,15,18  | 4      | 4 | 5.72 | 3 |
|                                                                    |        |                                                                                                                                                                                                                                                                                                                                                                                                                    |              |    |   | Y300                 | N*     | U    | 1,3,4,5      | 4      | 4 | 4.36 | 3 |
|                                                                    |        |                                                                                                                                                                                                                                                                                                                                                                                                                    | Y461         | N* | U | 11,12,13,14,16,17,18 | 6      | 40   | 5.63         | 3      |   |      |   |
|                                                                    |        |                                                                                                                                                                                                                                                                                                                                                                                                                    |              |    |   | 5                    |        | 3.53 | 2            |        |   |      |   |
|                                                                    |        |                                                                                                                                                                                                                                                                                                                                                                                                                    | Y461         |    |   | 1,3,4,5,6,7,8,9,10   | 9      |      | 6.05         | 3      |   |      |   |
|                                                                    |        |                                                                                                                                                                                                                                                                                                                                                                                                                    | Y461         |    |   | 2,3,4,5,7,8,9,10     | 13     |      | 6.28         | 3      |   |      |   |
|                                                                    |        |                                                                                                                                                                                                                                                                                                                                                                                                                    | Y461         |    |   | 11,12,13,15,16,17    | 6      |      | 5.35         | 3      |   |      |   |
|                                                                    |        |                                                                                                                                                                                                                                                                                                                                                                                                                    |              |    |   | 1                    |        | 3.90 | 2            |        |   |      |   |
| Putative ATP-dependent RNA helicase DHX30                          | Q99PU8 | R.ENYLEENLly@APSLR.F                                                                                                                                                                                                                                                                                                                                                                                               | Y991         | N* | U | 7                    | 1      | 1    | 2.83         | 2      |   |      |   |
| Probable ATP-dependent RNA helicase DDX6                           | P54823 | K.GVTQY@YAYVTER.Q                                                                                                                                                                                                                                                                                                                                                                                                  | Y312         | N* | U | 7                    | 1      | 1    | 2.37         | 2      |   |      |   |
| Putative pre-mRNA splicing factor ATP-dependent RNA helicase DHX15 | Q35286 | K.QNHESVQWC*Y@DNFINYR.S                                                                                                                                                                                                                                                                                                                                                                                            | Y645         | Y  | U | 4,7                  | 2      | 2    | 3.68         | 3      |   |      |   |
| Probable ATP-dependent RNA helicase DDX17 (DDX5)                   | Q501J6 | K.STC*IY@GGAPK.G<br>R.LKSTC*IY@GGAPK.G                                                                                                                                                                                                                                                                                                                                                                             | Y200<br>Y200 | Y  | U | 3<br>1,3             | 1<br>2 | 3    | 2.41<br>2.27 | 2<br>2 |   |      |   |
| Probable ATP-dependent RNA helicase DDX20 -- DEAD-box protein 20   | Q9JJY4 | R.VQSEPQEEWY@DC*HR.E<br>R.AWQEQY@YAAASHSYWNAQR.H                                                                                                                                                                                                                                                                                                                                                                   | Y757         | N* | U | 1,2,3,4,9,10         | 6      | 6    | 3.98         | 2      |   |      |   |
|                                                                    |        |                                                                                                                                                                                                                                                                                                                                                                                                                    | Y788         | Y  | U | 3,5,6,7              | 4      | 4    | 4.22         | 3      |   |      |   |
| Probable ATP-dependent helicase DDX48                              | Q91VC3 | K.GFKEQIY@DVYR.Y                                                                                                                                                                                                                                                                                                                                                                                                   | Y202         | N* | U | 1,2,3,4,5,7,9,10     | 6<br>8 | 14   | 3.59<br>3.02 | 3<br>2 |   |      |   |
| <b>hnRNPs and snRNPs</b>                                           |        |                                                                                                                                                                                                                                                                                                                                                                                                                    |              |    |   |                      |        |      |              |        |   |      |   |
| Heterogeneous nuclear ribonucleoprotein A1                         | P49312 | F.GGRSSGPY@GGGGQY.F<br>R.SSGPYGGGGQY@FAKPR.N                                                                                                                                                                                                                                                                                                                                                                       | Y288         | N* | U | 11,17                | 2      | 2    | 3.45         | 2      |   |      |   |
|                                                                    |        |                                                                                                                                                                                                                                                                                                                                                                                                                    | Y294         | N  | U | 2                    | 1      | 1    | 3.60         | 2      |   |      |   |
| Heterogeneous nuclear ribonucleoprotein A3                         | Q8BG05 | Y.GGGYGSGGGSGGY@GSRRF-                                                                                                                                                                                                                                                                                                                                                                                             | Y374         | N* | U | 12                   | 1      | 1    | 2.56         | 3      |   |      |   |
| Heterogeneous nuclear ribonucleoprotein A/B                        | Q3TMZ8 | Y.GPGYGGYDYSY@GYY.G<br>Y.GYQQGYGPGYGGYDY@SPYGY.G                                                                                                                                                                                                                                                                                                                                                                   | Y291         | Y  | U | 16,17                | 2      | 2    | 2.67         | 2      |   |      |   |
|                                                                    |        |                                                                                                                                                                                                                                                                                                                                                                                                                    | Y288         | Y  | U | 15,16,17             | 3      | 3    | 3.76         | 2      |   |      |   |
| Heterogeneous nuclear ribonucleoprotein F                          | Q9Z2X1 | K.ATENDIY@NFFSPLNPR.V<br>R.DLSYC*LSGMY@DHR.Y                                                                                                                                                                                                                                                                                                                                                                       | Y306         | Y  | U | 1,3,4,5,6,7,8,9,10   | 2<br>9 | 11   | 3.69<br>5.04 | 3<br>2 |   |      |   |
|                                                                    |        |                                                                                                                                                                                                                                                                                                                                                                                                                    | Y272         | Y  | U | 1,2,4,9              | 4      | 4    | 3.68         | 2      |   |      |   |
| Heterogeneous nuclear ribonucleoprotein H1                         | Q811L7 | R.GAYGGYGGY@DDYNGYNDGYGFGSDRFGR.D<br>R.GAYGGYGGYDDY@NGYNDGYGFGSDRFGR.D<br>R.RGAYGGYGGYDDY@NGYNDGYGFGSDR.F<br>R.RGAYGGYGGYDDY@NGYNDGYGFGSDRFGR.D<br>D<br>R.GAYGGYGGYDDYNGY@NDGYGFGSDRFGR.D                                                                                                                                                                                                                          | Y243         | N* | U | 2,3,4,9,10           | 5      | 5    | 5.03         | 3      |   |      |   |
|                                                                    |        |                                                                                                                                                                                                                                                                                                                                                                                                                    | Y246         | N  | U | 1,6,7,8              | 4      | 8    | 4.30         | 3      |   |      |   |
|                                                                    |        |                                                                                                                                                                                                                                                                                                                                                                                                                    | Y246         |    |   | 6,7,8                | 3      |      | 5.94         | 3      |   |      |   |
|                                                                    |        |                                                                                                                                                                                                                                                                                                                                                                                                                    | Y246         |    |   | 6                    | 1      |      | 4.18         | 3      |   |      |   |
|                                                                    |        |                                                                                                                                                                                                                                                                                                                                                                                                                    | Y249         | N* | U | 5                    | 1      | 1    | 3.68         | 3      |   |      |   |
| Heterogeneous nuclear ribonucleoprotein H'                         | P70333 | R.GAYGGYGGY@DDYGGYNDGYGFGSDRFGR.D<br>R.GAYGGYGGYDDY@GGYNDGYGFGSDRFGR.D<br>R.RGAYGGYGGYDDY@GGYNDGYGFGSDR.F<br>R.RGAYGGYGGYDDY@GGYNDGYGFGSDRFGR.D<br>D<br>Y.GGGYGGYDDY@GGYNDGYG.F<br>Y.GGGYGGYDDY@GGYNDGYG.F<br>Y.GGGYGGYDDY@GGYNDGYGFGSDRF.G<br>R.ATENDIY@NFFSPLNPR.V<br>Y.RATENDIY@NFFS                                                                                                                            | Y243         | N* | U | 9                    | 1      | 1    | 2.81         | 3      |   |      |   |
|                                                                    |        |                                                                                                                                                                                                                                                                                                                                                                                                                    | Y246         | Y  | U | 1,5,6,7,8,9,10       | 8      | 14   | 4.73         | 3      |   |      |   |
|                                                                    |        |                                                                                                                                                                                                                                                                                                                                                                                                                    | Y246         |    |   | 2,8,9                | 3      |      | 5.75         | 3      |   |      |   |
|                                                                    |        |                                                                                                                                                                                                                                                                                                                                                                                                                    | Y246         |    |   | 10                   | 1      |      | 3.73         | 3      |   |      |   |
|                                                                    |        |                                                                                                                                                                                                                                                                                                                                                                                                                    | Y246         |    |   | 11                   | 1      |      | 2.99         | 2      |   |      |   |
|                                                                    |        |                                                                                                                                                                                                                                                                                                                                                                                                                    | Y246         |    |   | 16                   | 1      |      | 4.66         | 2      |   |      |   |
|                                                                    |        |                                                                                                                                                                                                                                                                                                                                                                                                                    | Y306         | Y  | U | 1,2,7,10             | 4      | 5    | 4.91         | 2      |   |      |   |
|                                                                    |        |                                                                                                                                                                                                                                                                                                                                                                                                                    | Y306         |    |   | 15                   | 1      |      | 2.24         | 2      |   |      |   |
|                                                                    |        |                                                                                                                                                                                                                                                                                                                                                                                                                    |              |    |   |                      |        |      |              |        |   |      |   |
| Heterogeneous nuclear ribonucleoprotein L                          | Q8R081 | M.VKMAAAGGGGGGGRY@Y.G                                                                                                                                                                                                                                                                                                                                                                                              | Y16          | N* | U | 12                   | 1      | 1    | 2.62         | 3      |   |      |   |

|                                                                 |        |                                                                                                                                                              |                                                        |                       |                       |                                                                     |                                            |                                                            |                                                                      |                                           |
|-----------------------------------------------------------------|--------|--------------------------------------------------------------------------------------------------------------------------------------------------------------|--------------------------------------------------------|-----------------------|-----------------------|---------------------------------------------------------------------|--------------------------------------------|------------------------------------------------------------|----------------------------------------------------------------------|-------------------------------------------|
| Heterogeneous nuclear ribonucleoprotein M                       | Q9D0E1 | N.RFEFY@SNPTKRY.R                                                                                                                                            | Y62                                                    | N*                    | U                     | 11                                                                  | 1                                          | 1                                                          | 3.34                                                                 | 3                                         |
| Heterogeneous nuclear ribonucleoprotein Q                       | Q7TMK9 | Q.RQAAKNQMYDDYY@YY.G<br>R.GGYEDPY@YGYEDFQVGAR.G<br>Y.RGGYEDPY@YGY@EDFQVGAR.G<br>Y.RGGYEDPY@YGY@EDF.Q<br>Y.RGGYEDPY@YGYEDF.Q<br>Y.RGGYEDPY@YGYEDFQ.V          | Y432<br>Y485<br>Y485,Y488<br>Y485,Y488<br>Y485<br>Y485 | Y<br>Y<br>Y           | U<br>U<br>U           | 15,18<br>8<br>15<br>14<br>11,12,13,14,15,16,17,18<br>11             | 2<br>1<br>1<br>2<br>80<br>1                | 2<br>85<br>3<br>3.71<br>4.40<br>3.18                       | 4.30<br>4.46<br>3.61<br>3.71<br>4.40<br>3.18                         | 2<br>2<br>3<br>2<br>2<br>2                |
| Heterogeneous nuclear ribonucleoprotein R                       | Q8VHM5 | Y.RGGYEDPY@YGYDDGY.A                                                                                                                                         | Y489                                                   | Y                     | U                     | 11,12,13,14,15,16,17,18                                             | 8                                          | 8                                                          | 4.29                                                                 | 2                                         |
| Heterogeneous nuclear ribonucleoprotein U                       | Q88568 | K.NQSQGYNQWQQGFQWQKQWQSHYHQGY@Y.-                                                                                                                            | Y797                                                   | Y                     | U                     | 1,3,5,6,10                                                          | 5                                          | 5                                                          | 5.26                                                                 | 3                                         |
| Polypyrimidine tract binding protein                            | Q8R509 | Y.TSVAPVLRGQPNY@IQF.S                                                                                                                                        | Y126                                                   | Y                     | U                     | 15,16                                                               | 2                                          | 2                                                          | 4.23                                                                 | 2                                         |
| Polypyrimidine tract-binding protein 1 -- hnRNP                 | P17225 | R.GQPIY@IQFSNHK.E<br>Y.TSVAPVLRGQPIY@IQF.S                                                                                                                   | Y126<br>Y126                                           | N                     | U                     | 2,6<br>17,18                                                        | 2<br>2                                     | 4                                                          | 2.23<br>3.21                                                         | 2<br>2                                    |
| U1 small nuclear ribonucleoprotein 70 kDa                       | Q62376 | K.HHNQPY@C*GIAPYIR.E                                                                                                                                         | Y38                                                    | Y                     | U                     | 1,2,3,4,5,6,7,8,9,10                                                | 11                                         | 11                                                         | 5.25                                                                 | 3                                         |
| U1 small nuclear ribonucleoprotein C                            | Q62241 | K.FYC*DYC*DTY@LTHDSPSVR.K                                                                                                                                    | Y12                                                    | N                     | U                     | 1,2,6                                                               | 3                                          | 3                                                          | 3.31                                                                 | 3                                         |
| <b>Splicing factors</b>                                         |        |                                                                                                                                                              |                                                        |                       |                       |                                                                     |                                            |                                                            |                                                                      |                                           |
| Apoptosis-related RNA binding protein                           | Q9Z0H4 | K.ELFEPYGAIV@QINVLR.D                                                                                                                                        | Y67                                                    | N*                    | U                     | 7,8                                                                 | 2                                          | 2                                                          | 4.33                                                                 | 2                                         |
| Crooked neck-like protein 1                                     | P63154 | R.KVQADDGSDAGWEEY@Y@DYIFPEDAANQPNLK.L<br>R.KVQADDGSDAGWEEY@YDYIFPEDAANQPNLK.L<br>R.KVQADDGSDAGWEEY@DYIFPEDAANQPNLK.L<br>R.RKVQADDGSDAGWEEY@DYIFPEDAANQPNLK.L | Y640,Y641<br>Y640<br>Y641<br>Y641                      |                       |                       | 10<br>2<br>1,5,6,8,9,10<br>1,7,10                                   | 1<br>1<br>6<br>3                           | 2<br>10                                                    | 5.79<br>5.72<br>5.88<br>6.20                                         | 3<br>3<br>3<br>3                          |
| RNA binding motif, single-stranded interacting protein 1        | Q91W59 | K.QQMYPQY@ATYYPQYLQAK.Q<br>W.KQMYPQY@ATY.Y<br>K.QQMYPQY@ATY@YYPQYLQAK.Q<br>K.QQM#YYPQYATY@YYPQYLQAK.Q<br>K.QQMYPQYATY@YYPQYLQAK.Q<br>L.HNGFYPSPY@SIATN.R     | Y13<br>Y13<br>Y13,Y16<br>Y16<br>Y16<br>Y272            | Y<br>Y<br>Y<br>Y<br>Y | U<br>U<br>U<br>U<br>U | 1,4,6,7,8,9,10<br>11,12,15<br>4<br>3,4,6<br>1,2,3,4,6,9,10<br>11,18 | 4<br>6<br>3<br>1<br>1<br>3<br>2<br>10<br>2 | 14<br>2.90<br>4.81<br>3.74<br>4.64<br>4.49<br>4.64<br>3.20 | 4.39<br>4.31<br>2.90<br>4.81<br>3.74<br>4.64<br>4.49<br>4.64<br>3.20 | 3<br>2<br>2<br>3<br>2<br>3<br>3<br>2<br>2 |
| Splicing factor, arginine/serine-rich 1                         | Q6PDM2 | F.VRKEDMTY@AVR.K                                                                                                                                             | Y169                                                   | N*                    | U                     | 11                                                                  | 1                                          | 1                                                          | 2.69                                                                 | 3                                         |
| Splicing factor, arginine/serine-rich 3                         | P84104 | R.AFGY@YGPLR.S                                                                                                                                               | Y32                                                    | N*                    | U                     | 1,2,3,4,5,6,7,8                                                     | 8                                          | 8                                                          | 3.06                                                                 | 2                                         |
| Splicing factor 3b, subunit 4                                   | Q8QZY9 | F.IGNLDPEIDEKLLY@DTF.S                                                                                                                                       | Y117                                                   | Y                     | U                     | 11,12,13,14,15,16,17                                                | 7                                          | 7                                                          | 4.29                                                                 | 2                                         |
| Splicing factor, arginine/serine-rich 5                         | Q35326 | F.GFVFEFEDPRDADDAVY@ELDGKEL.C<br>R.GFGFVEFEDPRDADDAVY@ELDGK.E<br>R.GFGFVEFEDPRDADDAVY@ELDGKELC*SER.V                                                         | Y55<br>Y55<br>Y55                                      | Y                     | U                     | 11,12,16,17<br>8<br>1,8                                             | 2<br>3<br>1<br>2                           | 8                                                          | 4.62<br>4.60<br>2.79<br>5.18                                         | 3<br>2<br>3<br>3                          |
| Arginine/serine-rich splicing factor 6                          | Q921K3 | K.NGYGFVEFEDSRDADDAVY@ELNSK.E<br>Y.GFVFEFEDSRDADDAVY@ELNSKEL.C                                                                                               | Y53<br>Y53                                             | Y                     | U                     | 1,3,4,5,7,8,9,10<br>17                                              | 8<br>1                                     | 9                                                          | 6.58<br>4.10                                                         | 3<br>3                                    |
| Splicing factor, arginine/serine-rich 9                         | Q9D0B0 | R.DAEDAIY@GR.N                                                                                                                                               | Y71                                                    | N*                    | U                     | 1,2,3                                                               | 3                                          | 3                                                          | 3.36                                                                 | 2                                         |
| Splicing factor, proline- and glutamine-rich                    | Q8VIJ6 | R.FAQHGTFEY@EYSQR.W                                                                                                                                          | Y480                                                   | N*                    | U                     | 8                                                                   | 1                                          | 1                                                          | 3.50                                                                 | 2                                         |
| <b>Other RNA binding and processing</b>                         |        |                                                                                                                                                              |                                                        |                       |                       |                                                                     |                                            |                                                            |                                                                      |                                           |
| DAZ-associated protein 1                                        | Q9JII5 | L.AFPPPPSQAAPDMSKPTAQPDFPY@GQY.G                                                                                                                             | Y346                                                   | Y                     | U                     | 11,12,15,17                                                         | 4                                          | 4                                                          | 3.72                                                                 | 3                                         |
| Double-stranded RNA-binding protein Staufen homolog             | Q9Z108 | R.ELLY@GGTSPTAETILK.S<br>R.TRPSEQLY@YLSR.A                                                                                                                   | Y371<br>Y404                                           | Y<br>Y                | U<br>U                | 1,3,5,7<br>1,2,3,4,5,6,7,8,9,10                                     | 4<br>3<br>15                               | 4<br>18                                                    | 3.42<br>3.93<br>3.88                                                 | 2<br>3<br>2                               |
| ELAV-like protein 1                                             | P70372 | K.NMALLSQLY@HSPAR.R                                                                                                                                          | Y200                                                   | N*                    | U                     | 2,4,5,9                                                             | 3<br>1                                     | 4                                                          | 3.52<br>2.61                                                         | 2<br>3                                    |
| ELAV-like protein 2                                             | Q60899 | K.TNQAILSQLY@QSPNR.R                                                                                                                                         | Y219                                                   | Y                     | U                     | 2,3,7                                                               | 3                                          | 3                                                          | 4.34                                                                 | 2                                         |
| Fragile X mental retardation syndrome related protein 1 homolog | Q61584 | K.EISEGDEVEVY@SR.A<br>K.KEISEGDEVEVY@SR.A<br>L.KDPDSNPY@SLL.D                                                                                                | Y68<br>Y68<br>Y506                                     | N*                    | U                     | 9<br>1,2,8,9<br>12                                                  | 1<br>2<br>2<br>1                           | 5                                                          | 2.41<br>3.02<br>4.35<br>3.16                                         | 2<br>3<br>2<br>2                          |

|                                                                 |                  |                                                                                                                                                                                            |                                                       |                               |                                 |                                                         |                                 |        |                                                      |                                 |
|-----------------------------------------------------------------|------------------|--------------------------------------------------------------------------------------------------------------------------------------------------------------------------------------------|-------------------------------------------------------|-------------------------------|---------------------------------|---------------------------------------------------------|---------------------------------|--------|------------------------------------------------------|---------------------------------|
| Fragile X mental retardation syndrome related protein 2 homolog | Q9WVR4           | R.LPPPADYNKEITGEVEVY@SR.A<br>L.KDPSNPY@SLDSTSEPEPPVDSEPPASAR.<br>R                                                                                                                         | Y78<br>Y520                                           | Y<br>N                        | U<br>U                          | 1,2<br>11                                               | 2<br>1                          | 2<br>1 | 3.92<br>4.18                                         | 3<br>3                          |
| Insulin-like growth factor 2 mRNA-binding protein 2             | Q5SF07           | K.SGY@AFVDYDPQNWAIR.A                                                                                                                                                                      | Y40                                                   | N*                            | U                               | 2,3,6,8,9,10                                            | 6                               | 6      | 5.17                                                 | 2                               |
| Insulin-like growth factor 2, binding protein 1                 | Q80US9           | K.SGY@AFVDC*PDEHWAMK.A                                                                                                                                                                     | Y39                                                   | N*                            | U                               | 2,10                                                    | 2                               | 2      | 3.49                                                 | 3                               |
| Interleukin enhancer-binding factor 3                           | Q9Z1X4           | R.VLEC*LASGIVMPDGGSIY@DPC*EKEATDAIGHLD<br>R.Q                                                                                                                                              | Y292                                                  | Y                             | U                               | 3,4,5                                                   | 3                               | 3      | 5.29                                                 | 3                               |
| Matrin-3                                                        | Q8K310           | R.SATREPPY@RVPR.D<br>R.SQESGYY@DRMDYEDDRLR.D                                                                                                                                               | Y171<br>Y214                                          | N*<br>N*                      | U<br>U                          | 1<br>2,8,9,10                                           | 1<br>4                          | 1<br>4 | 2.55<br>3.65                                         | 3<br>3                          |
| Polyadenylate-binding protein 1 -- PABP1 (PABC4)                | P29341           | Y.VGDLHPDVTEAM#LY@EKF.S<br>Y.VGDLHPDVTEAMLY@EKF.S<br>K.ALY@DTFSAFGNILSC*K.V                                                                                                                | Y28<br>Y28<br>Y116                                    | Y<br>Y<br>N*                  | U<br>U<br>U                     | 17<br>11,16,17,18<br>8                                  | 1<br>4<br>1                     | 5<br>1 | 4.08<br>3.82<br>4.27                                 | 3<br>2<br>2                     |
| Poly(rC)-binding protein 2                                      | Q61990           | Y.TIQGQY@AIPQPDLTKL.H<br>Y.TIQGQY@AIPQPDLTKLHQLAM#Q<br>Y.TIQGQY@AIPQPDLTKLHQLAM.Q                                                                                                          | Y232<br>Y232<br>Y232                                  | Y<br>Y<br>Y                   | C<br>C<br>C                     | 11,12,14,16<br>11,12<br>11,13,17                        | 4<br>2<br>3<br>1                | 10     | 3.90<br>4.64<br>3.47<br>3.76                         | 2<br>3<br>3<br>2                |
| Poly(rC)-binding protein 3                                      | P57722           | K.PASTPVIFAGGQAYTIQGQY@AIPHPDLTK.L                                                                                                                                                         | Y201                                                  | Y                             | U                               | 1,2                                                     | 2                               | 2      | 3.97                                                 | 3                               |
| Protein SMG7                                                    | Q5RJH6           | K.VPEFYWDSSY@SMADNR.A                                                                                                                                                                      | Y826                                                  | Y                             | U                               | 9,10                                                    | 2                               | 2      | 4.78                                                 | 2                               |
| Pumilio homolog 1                                               | Q80U78           | R.SQDDAMVDY@FFQR.Q                                                                                                                                                                         | Y83                                                   | N*                            | U                               | 2,7,9                                                   | 3                               | 3      | 4.55                                                 | 2                               |
| Putative RNA-binding protein 3                                  | O89086           | R.YDSRPGGYGY@GYGR.S<br>R.YDSRPGGYGY@GR.S                                                                                                                                                   | Y124<br>Y126                                          | N*<br>N                       | C<br>C                          | 7,8<br>6,10                                             | 2<br>2                          | 2<br>2 | 3.64<br>3.19                                         | 3<br>3                          |
| Ras-GTPase-activating protein binding protein 1 -- G3bp1        | P97855           | K.NSSYAHGGLDSNGKPADAVY@GQK.E                                                                                                                                                               | Y56                                                   | N                             | U                               | 2,8                                                     | 2                               | 2      | 3.83                                                 | 3                               |
| Ras-GTPase-activating protein SH3-domain binding protein        | UPI000D62<br>F64 | K.NSSYAHGGLDSNGKPADAVY@GKK.E                                                                                                                                                               | Y56                                                   | Y                             | U                               | 1,7,9,10                                                | 4                               | 4      | 4.06                                                 | 3                               |
| Ras-GTPase-activating protein binding protein 2                 | P97379           | R.NSSYVHGGVDASGKQAEVY@GQNDIHHK.V<br>Y.VHGGVDASGKQAEVY@GQNDIHHK.V.L.S                                                                                                                       | Y56<br>Y56                                            | N*                            | U                               | 2<br>11                                                 | 1<br>1                          | 2      | 3.91<br>5.24                                         | 3<br>3                          |
| Regulator of differentiation 1 -- Rod1                          | Q8BHD7           | R.SQPVY@IQYSNHR.E                                                                                                                                                                          | Y98                                                   | N*                            | U                               | 1,7                                                     | 2                               | 2      | 2.51                                                 | 2                               |
| Regulator of nonsense transcripts 1 -- RENT1                    | Q9EPU0           | L.AELNFEDEEDTY@YTKDLPVHAC*.S.Y.C<br>L.AELNFEDEEDTY@YTKDLPVHAC*.S<br>L.LAELNFEDEEDTY@YTKDLPVHAC*.S<br>K.RFTAQGLPDLNHSQVY@AVK.T<br>R.FM#TTAMY@DAR.E<br>R.FMTTAMY@DAR.E<br>R.AYQHGGVTGLSQY@.- | Y108<br>Y108<br>Y108<br>Y472<br>Y930<br>Y930<br>Y1113 | Y<br>Y<br>Y<br>N*<br>N*<br>N* | U<br>U<br>U<br>U<br>U<br>U<br>U | 16,18<br>14<br>14<br>1,3,4,5,7<br>3<br>1,2,3,4,5,9<br>2 | 2<br>1<br>1<br>5<br>1<br>6<br>1 | 4      | 4.78<br>4.18<br>4.94<br>4.77<br>2.56<br>3.48<br>2.37 | 3<br>3<br>3<br>3<br>2<br>2<br>2 |
| <b>PROTEIN SYNTHESIS AND PROCESSING</b>                         |                  |                                                                                                                                                                                            |                                                       |                               |                                 |                                                         |                                 |        |                                                      |                                 |
| <b>tRNA synthetases</b>                                         |                  |                                                                                                                                                                                            |                                                       |                               |                                 |                                                         |                                 |        |                                                      |                                 |
| Alanyl-tRNA synthetase                                          | Q8BGQ7           | K.DNFWEMGDTGPC*GPC*SEIHY@DR.I                                                                                                                                                              | Y192                                                  | N*                            | U                               | 1,3,4,6,7,10                                            | 6                               | 6      | 4.55                                                 | 3                               |
| Arginyl-tRNA synthetase                                         | Q9D0I9           | K.SDGGYTY@DTSDLAAIK.Q                                                                                                                                                                      | Y384                                                  | N*                            | U                               | 2,8,9,10                                                | 4                               | 4      | 4.92                                                 | 2                               |
| Bifunctional aminoacyl-tRNA synthetase                          | Q8CGC7           | R.GFFIC*DQPYEPSPY@SC*R.E<br>R.RGFFIC*DQPYEPSPY@SC*R.E                                                                                                                                      | Y690<br>Y690                                          | N                             | U                               | 1,2,3,4,5,6,7,8,9,10<br>1,2,5,6,7,8,10                  | 2<br>16<br>7<br>3               | 28     | 3.56<br>4.53<br>4.83<br>4.13                         | 3<br>2<br>3<br>2                |
| Cysteinyl-tRNA synthetase                                       | Q9ER72           | K.VTWYC*C*GPTVY@DASHMGHAR.S                                                                                                                                                                | Y143                                                  | N*                            | U                               | 1,3                                                     | 2                               | 2      | 2.78                                                 | 3                               |
| Histidyl-tRNA synthetase                                        | Q61035           | K.LIY@DLKDQGGELLSLR.Y<br>K.YGEDSKLIY@DLKDQGGELLSLR.Y<br>L.TGKYGEDSKLIY@DLKDQGGELLS                                                                                                         | Y115<br>Y115<br>Y115                                  | Y                             | U                               | 1,2,3,4,5,6,7,9,10<br>2,6,7,8<br>14                     | 9<br>7<br>4<br>1                | 21     | 5.12<br>5.95<br>5.02<br>3.46                         | 3<br>2<br>3<br>3                |
| Isoleucine-tRNA synthetase                                      | Q6NXK4           | K.NNDLC*Y@WVPEFVR.E                                                                                                                                                                        | Y434                                                  | N*                            | U                               | 1,2,3,4,5,6,7,8,9,10                                    | 10                              | 10     | 4.45                                                 | 2                               |
| Ilysyl-tRNA synthetase                                          | Q8C292           | K.ITYHPDGPEGQAY@EVDFTPPFR.R<br>K.ITYHPDGPEGQAY@EVDFTPPFR.R.I                                                                                                                               | Y381<br>Y381                                          | Y                             | U                               | 1,3,8,9<br>7                                            | 4<br>1                          | 5      | 4.19<br>4.27                                         | 3<br>3                          |
| Valyl-tRNA synthetase                                           | Q9Z1Q9           | R.LHEEGVIY@R.S                                                                                                                                                                             | Y468                                                  | N*                            | U                               | 1,2,3,10                                                | 4                               | 4      | 2.77                                                 | 2                               |
| <b>Translation machinery</b>                                    |                  |                                                                                                                                                                                            |                                                       |                               |                                 |                                                         |                                 |        |                                                      |                                 |

|                                                                                                                                 |               |                                                                                                                                                                                       |                                                  |                                |                            |                                                                               |                                         |        |                                                              |                                      |
|---------------------------------------------------------------------------------------------------------------------------------|---------------|---------------------------------------------------------------------------------------------------------------------------------------------------------------------------------------|--------------------------------------------------|--------------------------------|----------------------------|-------------------------------------------------------------------------------|-----------------------------------------|--------|--------------------------------------------------------------|--------------------------------------|
| 40S ribosomal protein S10                                                                                                       | P63325        | R.IAIY@ELLFK.E                                                                                                                                                                        | Y12                                              | N                              | C                          | 1,4,6,7,8,9,10                                                                | 7                                       | 7      | 3.24                                                         | 2                                    |
| 60S ribosomal protein L3                                                                                                        | P27659        | K.NNASTDY@DLSDK.S                                                                                                                                                                     | Y306                                             | N                              | U                          | 1,2,4,8,10                                                                    | 5                                       | 5      | 3.47                                                         | 2                                    |
| 60S ribosomal protein L4                                                                                                        | Q9D8E6        | R.KLDELY@GTWR.K                                                                                                                                                                       | Y264                                             | N*                             | U                          | 1,4,5,9                                                                       | 4                                       | 4      | 2.95                                                         | 2                                    |
| mitochondrial ribosomal protein S27                                                                                             | UPI00001C5303 | F.VDNASREDLDSA EY@YLYK<br>R.FVDNIASREDLDSA EY@YLYK.F<br>R.EDLDSA EY@YLYK.F                                                                                                            | Y90<br>Y90<br>Y90                                | Y                              | U                          | 16,17,18<br>2,3<br>7                                                          | 3<br>2<br>1                             | 6      | 3.36<br>4.12<br>3.79                                         | 2<br>3<br>2                          |
| Eukaryotic translation initiation factor 2A                                                                                     | Q640P8        | L.VIASTEVDKGTGASY@YGEQTLH.Y<br>L.VIASTEVDKGTGASY@YGEQTLHY.I<br>K.LISKPVASDSTY@FAWC*PDGEHILTATC*APR.L<br>K.PVASDSTY@FAWC*PDGEHILTATC*APR.L<br>L.ISKPVASDSTY@FA<br>Y.KLISKPVASDSTY@FA   | Y250<br>Y250<br>Y362<br>Y362<br>Y362             | N*                             | U                          | 11<br>11,16,17<br>2,3,4,5,10<br>3<br>11,12<br>11,18                           | 1<br>3<br>8<br>1<br>2<br>2              | 4      | 3.10<br>5.43<br>5.67<br>3.43<br>3.25<br>4.10                 | 3<br>3<br>3<br>3<br>2<br>2           |
| Eukaryotic translation initiation factor 3 subunit 1                                                                            | Q66JS6        | L.KATM#KDDLADY@GGYEGGYVQDYEDFM#.-<br>L.KATMKDDLADY@GGYEGGYVQDYEDFM#.-<br>L.KATMKDDLADY@GGYEGGYVQDYEDFM.-                                                                              | Y248<br>Y248<br>Y248                             | Y                              | U                          | 17<br>17<br>16,17,18                                                          | 1<br>1<br>3                             | 5      | 5.69<br>3.96<br>5.00                                         | 3<br>3<br>3                          |
| Eukaryotic translation initiation factor 3, subunit 7                                                                           | O70194        | R.NLAMEATY@INHNFSQQC*LR.M                                                                                                                                                             | Y317                                             | Y                              | U                          | 1,3,4,5,6,7,8,10                                                              | 8                                       | 8      | 4.21                                                         | 3                                    |
| Eukaryotic translation initiation factor 3, subunit 8                                                                           | Q8R1B4        | F.DHKQGTY@GGY.F<br>F.DHKQGTY@GGY.F<br>L.GSLVENNERVFDHKQGTY@GGY.F<br>R.VFDHKQGTY@GGY.F.R                                                                                               | Y879<br>Y879<br>Y879<br>Y879                     | N*                             | U                          | 11<br>11,12,13,14,15,18<br>11,13,15,16,17,18<br>3                             | 1<br>6<br>6<br>1                        | 14     | 2.31<br>3.77<br>4.29<br>2.52                                 | 2<br>2<br>3<br>3                     |
| Eukaryotic translation initiation factor 3, subunit 9                                                                           | Q8JZQ9        | R.MTLDTLSIY@ETPSMGLLDDK.S                                                                                                                                                             | Y438                                             | N*                             | U                          | 1,2,3,4,5                                                                     | 5                                       | 5      | 3.86                                                         | 3                                    |
| Eukaryotic translation initiation factor 3 subunit 10                                                                           | P23116        | K.KQPALDVLV@DVMK.S<br>F.LEVGKKQPALDVLV@DVM.K                                                                                                                                          | Y32<br>Y32                                       | N*                             | U                          | 1,2,3,5,6,7,9,10<br>14                                                        | 10<br>1                                 | 11     | 4.47<br>3.04                                                 | 2<br>2                               |
| Eukaryotic translation initiation factor 4 gamma 1                                                                              | Q6NZJ6        | Y.SASQGAY@YIPGQGRSTY.V                                                                                                                                                                | Y110                                             | Y                              | U                          | 11,12                                                                         | 2                                       | 2      | 3.57                                                         | 2                                    |
| Eukaryotic translation initiation factor 4B                                                                                     | Q8BGD9        | F.LGNLPY@DVTEDSIKDFR.R<br>K.SPPYTAFLGNLPY@DVTEDSIKDFR.G                                                                                                                               | Y105<br>Y105                                     | N*                             | U                          | 11,12,13,14<br>4,5                                                            | 4<br>2                                  | 6      | 4.96<br>6.60                                                 | 2<br>3                               |
| Eukaryotic initiation factor 4A-I                                                                                               | P60843        | K.VVMALGDY@MGASC*HAC*IGGTNVR.A<br>M.ALGDY@MGASC*H.A<br>R.GFKDQIY@DIFQK.L                                                                                                              | Y126<br>Y126<br>Y197                             | Y<br>N*                        | U<br>C                     | 2<br>11<br>1,2,3,4,5,6,7,8,9,10                                               | 1<br>1<br>8<br>13                       | 2      | 3.36<br>2.16<br>3.80<br>4.00                                 | 3<br>2<br>3<br>2                     |
| Eukaryotic translation initiation factor 4H                                                                                     | Q9WUK2        | R.AY@SSFSGGR.G<br>H.GSRSQKELPTEPPY@TAY.V<br>Q.KELPTEPPY@TAY.V<br>R.SQKELPTEPPYTAY@VGNLPLFTVQGDIDAIFK.D                                                                                | Y11<br>Y41<br>Y41<br>Y44                         | N<br>N*<br>N                   | U<br>U<br>U                | 8,9,10<br>11<br>11,12,17,18<br>8                                              | 3<br>1<br>4<br>1                        | 3<br>5 | 2.52<br>3.29<br>3.49<br>4.86                                 | 2<br>2<br>2<br>3                     |
| Elongation factor 1-alpha 1 -- eEF1A-1 (eEF1A-2)                                                                                | P10126        | K.STTTGHLIY@K.C<br>R.EHALLAY@TLGVK.Q                                                                                                                                                  | Y29<br>Y141                                      | N<br>N                         | C<br>C                     | 1,2,3,4,5,6,7,8,9,10<br>1,3,4,7                                               | 18<br>4                                 | 18     | 3.09<br>3.17                                                 | 2<br>2                               |
| G1 to phase transition 2 (GSP12)                                                                                                | Q9CY91        | K.TAGVKY@LIVLINK.M                                                                                                                                                                    | Y347                                             | Y                              | C                          | 8                                                                             | 1                                       | 1      | 2.99                                                         | 2                                    |
| Laminin receptor 1 -- ribosomal protein SA                                                                                      | Q8BNL2        | R.ADHQPLTEASY@VNLPTIALC*NTDSPLR.Y                                                                                                                                                     | Y139                                             | N                              | C                          | 1,2,3,5,7                                                                     | 5                                       | 5      | 6.27                                                         | 3                                    |
| 67 kDa polymerase-associated factor PAF67; Eukaryotic translation initiation factor 3 subunit 6-interacting protein -- Eif3s6ip | Q91YE4        | K.TVSDLIDQKVY@ELQASR.V<br>K.VY@ELQASR.V<br>Y.FHKTVSDLIDQKVY@EL.Q<br>R.VSSDVIDQKVY@EIQDIYENSWTK.L<br>R.QLEVY@TSGGDPEVSAGEYGR.H<br>K.GDPQVYEELFSY@AC*PK.F<br>R.MQKGDQPQVYEELFSY@AC*PK.F | Y72<br>Y72<br>Y72<br>Y89<br>Y247<br>Y415<br>Y415 | N*<br>N*<br>N*<br>Y<br>Y<br>N* | U<br>U<br>U<br>U<br>U<br>C | 1,2,3,4,5,6,7,8,9,10<br>8<br>11,12,14<br>5<br>2,10<br>1,2,3,5,6,7,8,9,10<br>2 | 12<br>11<br>1<br>3<br>1<br>2<br>10<br>1 | 27     | 5.06<br>5.02<br>2.24<br>3.87<br>4.49<br>4.72<br>4.88<br>2.64 | 3<br>2<br>2<br>2<br>3<br>2<br>2<br>2 |
| <b>Post-translational modifiers</b>                                                                                             |               |                                                                                                                                                                                       |                                                  |                                |                            |                                                                               |                                         |        |                                                              |                                      |
| N-terminal acetyltransferase complex ARD1 subunit homolog A                                                                     | Q9QY36        | F.QISEVEPKY@YADGEDAY.A<br>L.NFQISEVEPKY@YADGEDAY.A<br>K.YYADGEDAY@AMKR.D                                                                                                              | Y137<br>Y137<br>Y145                             | N*<br>N*<br>N*                 | U<br>U<br>U                | 11,12<br>11,12,13,14,15,16,17<br>2,7,8,9                                      | 2<br>7<br>4                             | 9      | 3.31<br>4.92<br>3.21                                         | 2<br>2<br>2                          |
| Probable palmitoyltransferase ZDHHC8                                                                                            | Q5Y5T5        | L.RSQTDSLFGDSGVY@DTPSSY.S                                                                                                                                                             | Y576                                             | N*                             | C                          | 17                                                                            | 1                                       | 1      | 4.42                                                         | 2                                    |
| Glutathione S-transferase P 1                                                                                                   | P19157        | K.YVTLIY@TNYENK.N<br>K.YVTLIY@TNYENKNDYVK.A                                                                                                                                           | Y108<br>Y108                                     | Y                              | U                          | 7<br>7                                                                        | 1<br>1                                  | 2      | 3.38<br>4.04                                                 | 2<br>2                               |
| <b>Chaperones and associated proteins</b>                                                                                       |               |                                                                                                                                                                                       |                                                  |                                |                            |                                                                               |                                         |        |                                                              |                                      |

|                                                      |        |                                                                                                                                                                                                                                                                        |                                                                           |             |        |                                                                                                                                                  |                                                            |                |                                                                                              |                                                          |
|------------------------------------------------------|--------|------------------------------------------------------------------------------------------------------------------------------------------------------------------------------------------------------------------------------------------------------------------------|---------------------------------------------------------------------------|-------------|--------|--------------------------------------------------------------------------------------------------------------------------------------------------|------------------------------------------------------------|----------------|----------------------------------------------------------------------------------------------|----------------------------------------------------------|
| BAG-family molecular chaperone regulator-3           | Q9JLV1 | K.THYPAAQGEY@QPQPVYHK.I<br>K.THYPAAQGEYQPQPVY@HK.I<br>K.THYPAAQGEY@QPQPVY@HK.I                                                                                                                                                                                         | Y246<br>Y253<br>Y246,Y253                                                 | N<br>N<br>C | C<br>U | 1,2,7<br>1,2,4,5,6,8,9,10<br>2                                                                                                                   | 3<br>8<br>1                                                | 4<br>9<br>3.92 | 4.24<br>4.98<br>3                                                                            | 3<br>3<br>3                                              |
| DnaJ homolog subfamily B member 4                    | Q9D832 | K.VSLEEIY@SGC*TK.R                                                                                                                                                                                                                                                     | Y172                                                                      | N           | U      | 2,3,4                                                                                                                                            | 3                                                          | 3              | 3.20                                                                                         | 2                                                        |
| Heat shock 70 kDa protein 4                          | Q61316 | K.LKKEDIY@AVEIVGGATR.I<br>K.NAVEEYVY@EMRDKLSGEYEF.F                                                                                                                                                                                                                    | Y336<br>Y627                                                              | N<br>Y      | C<br>U | 1,2,3,4,5,8,9,10<br>6,7,8,9,10                                                                                                                   | 10<br>4<br>5                                               | 14<br>5        | 3.70<br>5.24<br>4.31                                                                         | 3<br>2<br>3                                              |
| Heat shock cognate 71 kDa protein                    | P63017 | R.MVQEAKEY@KAEDEKQR.D                                                                                                                                                                                                                                                  | Y525                                                                      | N*          | U      | 1                                                                                                                                                | 1                                                          | 1              | 3.66                                                                                         | 3                                                        |
| Heat shock protein 75 kDa, mitochondrial precursor   | Q9CQN1 | R.NIY@YLC*APNR.H                                                                                                                                                                                                                                                       | Y500                                                                      | N*          | U      | 2,4,5,6,7,9,10                                                                                                                                   | 7                                                          | 7              | 3.43                                                                                         | 2                                                        |
| Heat shock protein HSP 90-beta                       | P11499 | K.SIY@YITGESK.E                                                                                                                                                                                                                                                        | Y483                                                                      | N           | C      | 1,2,3,5,6,7,8,9,10                                                                                                                               | 11                                                         | 11             | 3.26                                                                                         | 2                                                        |
| Heat-shock protein 105 kDa                           | Q61699 | K.NAVEEC*VY@EFR.D<br>K.NAVEEC*VY@EFRDK.L                                                                                                                                                                                                                               | Y644<br>Y644                                                              | N*          | U      | 4<br>1,2,7                                                                                                                                       | 1<br>3                                                     | 4              | 2.70<br>3.85                                                                                 | 2<br>2                                                   |
| T-complex protein 1, beta subunit                    | P80314 | F.INRQLIY@NYPEQLF.G<br>R.QLIY@NYPEQLFGAAGVMAIEHADFAGVER.L                                                                                                                                                                                                              | Y296<br>Y296                                                              | N*          | U      | 11,12,13,14,16,17,18<br>3,4,5                                                                                                                    | 8<br>3                                                     | 11             | 3.84<br>4.22                                                                                 | 2<br>3                                                   |
| T-complex protein 1, theta subunit                   | P42932 | K.HFSGLEAVY@R.N                                                                                                                                                                                                                                                        | Y29                                                                       | N           | U      | 1,2,6,7,8,9,10                                                                                                                                   | 7                                                          | 7              | 3.53                                                                                         | 2                                                        |
| <b>PROTEIN DEGRADATION</b>                           |        |                                                                                                                                                                                                                                                                        |                                                                           |             |        |                                                                                                                                                  |                                                            |                |                                                                                              |                                                          |
| <b>Ubiquitin conjugation regulators</b>              |        |                                                                                                                                                                                                                                                                        |                                                                           |             |        |                                                                                                                                                  |                                                            |                |                                                                                              |                                                          |
| Anaphase promoting complex subunit 2                 | Q8BZQ7 | K.VRDQQLIY@SAGVYR.L<br>K.VRDQQLIY@SAGVYRLPK.N<br>R.DQQLIY@SAGVYR.L<br>R.DQQLIY@SAGVYRLPK.N                                                                                                                                                                             | Y825<br>Y825<br>Y825<br>Y825                                              | N*          | U      | 2,3,4<br>1,2,3,5,6,7,8,9,10<br>1,2,3,4,6,7,8,10<br>1,2,5,7,8,9,10                                                                                | 1<br>2<br>9<br>8<br>3<br>7                                 | 30             | 2.58<br>4.44<br>6.13<br>4.35<br>3.45<br>4.40                                                 | 3<br>2<br>3<br>2<br>3<br>2                               |
| CBL E3 ubiquitin protein ligase                      | P22682 | K.IKPSSSANAIY@SLAARPLMPK.L<br>K.PSSSANAIY@SLAARPLMPK.L                                                                                                                                                                                                                 | Y672<br>Y672                                                              | N           | C      | 1<br>1,3,7                                                                                                                                       | 1<br>3                                                     | 4              | 2.71<br>4.45                                                                                 | 3<br>3                                                   |
| F-box-like/WD-repeat protein TBL1X                   | Q9QXE7 | K.HQEPVY@SVAFSPDGK.Y                                                                                                                                                                                                                                                   | Y459                                                                      | N*          | U      | 1,4,5,6,7,9,10                                                                                                                                   | 7                                                          | 7              | 4.17                                                                                         | 2                                                        |
| F-box-like/WD-repeat protein TBLR1                   | Q8BHJ5 | K.HQEPVY@SVAFSPDGR.Y                                                                                                                                                                                                                                                   | Y446                                                                      | N*          | U      | 1,2,3,4                                                                                                                                          | 4                                                          | 4              | 4.21                                                                                         | 2                                                        |
| HECT, UBA and WWE domain containing protein 1        | Q7TMY8 | R.EMFNPMY@ALFR.T                                                                                                                                                                                                                                                       | Y4081                                                                     | N*          | U      | 9                                                                                                                                                | 1                                                          | 1              | 2.84                                                                                         | 2                                                        |
| Ubiquitin conjugating enzyme 7 interacting protein 3 | Q9WUB0 | R.NSQEAEVAC*PFIDSTY@SC*PGK.L                                                                                                                                                                                                                                           | Y318                                                                      | N           | U      | 1,2,3,4,6,7,8,9,10                                                                                                                               | 3<br>9                                                     | 12             | 5.35<br>5.61                                                                                 | 3<br>2                                                   |
| Ubiquitin-conjugating enzyme                         | O88738 | K.VIFVDDY@AVGC*R.K<br>K.VIFVDDY@AVGC*RK.D                                                                                                                                                                                                                              | Y107<br>Y107                                                              | Y           | U      | 4<br>2                                                                                                                                           | 1<br>1                                                     | 2              | 2.34<br>3.18                                                                                 | 2<br>2                                                   |
| Ubiquitin-conjugating enzyme E2O                     | Q6PCR9 | K.LRPSGDDVELIGEEDVSVY@DIADHPDFR.F                                                                                                                                                                                                                                      | Y412                                                                      | Y           | U      | 8,10                                                                                                                                             | 2                                                          | 2              | 5.39                                                                                         | 3                                                        |
| Ubiquitin-protein ligase E3 Mdm2                     | P23804 | S.DEDDEVY@RVTVY@QTGESDTSFEGDPEISLA<br>DY.W                                                                                                                                                                                                                             | Y279                                                                      | N*          | U      | 15                                                                                                                                               | 1                                                          | 1              | 2.66                                                                                         | 3                                                        |
| <b>Proteasome components</b>                         |        |                                                                                                                                                                                                                                                                        |                                                                           |             |        |                                                                                                                                                  |                                                            |                |                                                                                              |                                                          |
| 26S protease regulatory subunit S10B                 | P62334 | K.GC*LLY@GPPGTGK.T                                                                                                                                                                                                                                                     | Y173                                                                      | N*          | U      | 1,3,4                                                                                                                                            | 3                                                          | 3              | 3.44                                                                                         | 2                                                        |
| 26S protease regulatory subunit 8                    | P62196 | K.GVLLY@GPPGTGK.T                                                                                                                                                                                                                                                      | Y189                                                                      | N*          | U      | 2                                                                                                                                                | 1                                                          | 1              | 2.47                                                                                         | 2                                                        |
| 26S protease regulatory subunit 6B                   | P54775 | L.SFLGPEPEDLEDLY@SRYK                                                                                                                                                                                                                                                  | Y41                                                                       | N*          | U      | 11                                                                                                                                               | 1                                                          | 1              | 3.11                                                                                         | 2                                                        |
| 26S proteasome non-ATPase regulatory subunit 7       | P26516 | W.FLDHDYLENM#Y@GM#F.K<br>W.FLDHDYLENM#Y@GM#F.K<br>W.FLDHDYLENM#Y@GM#F.K                                                                                                                                                                                                | Y79<br>Y79<br>Y79                                                         | Y           | U      | 15,18<br>16,17,18<br>11,12,16,18                                                                                                                 | 2<br>3<br>4                                                | 9              | 3.49<br>3.55<br>3.81                                                                         | 2<br>2<br>2                                              |
| Proteasome subunit alpha type 2 -- PSMA2             | P49722 | L.ATEKKQKSILY@DERSVH.K<br>H.IGLVY@SGM#GPDYRVL.V<br>H.IGLVY@SGM#GPDYRVL.V<br>H.KVEPITKHIGLVY@SGM#GPDYRVL.V<br>H.KVEPITKHIGLVY@SGM#GPDYRVL.V<br>K.HIGLVY@SGM#GPDYR.V<br>K.HIGLVY@SGM#GPDYRVL.V<br>K.HIGLVY@SGM#GPDYR.V<br>K.HIGLVY@SGM#GPDYRVL.V<br>K.HIGLVY@SGM#GPDYR.V | Y56<br>Y75<br>Y75<br>Y75<br>Y75<br>Y75<br>Y75<br>Y75<br>Y75<br>Y75<br>Y75 | N*<br>N*    | U<br>C | 11<br>11,15<br>11,12,13,14,15,16,17,18<br>11,17<br>11,12,13,15,16,17,18<br>1,2,3,4,5,6,7,8,10<br>12<br>1,2,3,4,5,6,7,8,9,10<br>11,12,13,15,16,17 | 1<br>2<br>9<br>2<br>8<br>9<br>9<br>1<br>10<br>14<br>4<br>3 | 1<br>72        | 3.37<br>3.74<br>4.40<br>4.37<br>6.11<br>4.21<br>4.56<br>2.17<br>3.86<br>5.16<br>3.42<br>4.35 | 3<br>2<br>2<br>3<br>3<br>3<br>2<br>2<br>3<br>2<br>3<br>3 |

|                                                      |                   |                                                                                                                                                                                                                                                                                               |                                                                                                |                                                         |                                                                                                              |                                                |                  |                                                                          |                                               |
|------------------------------------------------------|-------------------|-----------------------------------------------------------------------------------------------------------------------------------------------------------------------------------------------------------------------------------------------------------------------------------------------|------------------------------------------------------------------------------------------------|---------------------------------------------------------|--------------------------------------------------------------------------------------------------------------|------------------------------------------------|------------------|--------------------------------------------------------------------------|-----------------------------------------------|
|                                                      |                   | L.VY@SGMGPDYRVL.V<br>K.LAQQYY@LVY@QEPIPTAQLVQR.V<br>K.LAQQYYLVY@QEPIPTAQLVQR.V<br><br>R.KLAQQYY@LVY@QEPIPTAQLVQR.V<br>R.KLAQQYYLVY@QEPIPTAQLVQR.V<br><br>Y.YLVY@QEPIPTAQLV                                                                                                                    | Y75<br>Y97,Y100<br>Y100<br><br>Y97,Y100<br>Y100<br><br>Y100                                    | N<br>U<br>N*<br>U<br><br>N*<br>U<br><br>N*<br>U         | 18<br>5,6,7<br>1,2,3,4,5,6,7,8,10<br><br>1,2,4,5,6,7,8<br>1,2,3,4,5,6,7,8,9,10<br><br>12,14                  | 1<br>3<br>9<br>8<br>7<br>13<br>3<br>2          | 10<br>45         | 2.75<br>4.75<br>5.16<br>5.18<br>5.64<br>5.74<br>4.38<br>2.96             | 2<br>3<br>3<br>2<br>3<br>3<br>2<br>2          |
| Proteasome subunit alpha type 6                      | Q9QUM9            | Y.KC*DPAGYY@C*GF.K                                                                                                                                                                                                                                                                            | Y160                                                                                           | N*<br>U                                                 | 11                                                                                                           | 1                                              | 1                | 2.85                                                                     | 2                                             |
| Proteasome subunit beta type 1                       | O09061            | K.GAVY@SFDPVGSYQR.D<br>K.DVFISAERDVY@TGDALR.I                                                                                                                                                                                                                                                 | Y149<br>Y215                                                                                   | N*<br>Y<br>U<br>U                                       | 1,2,3,4,5,7,8,10<br>1,3                                                                                      | 8<br>2                                         | 8<br>2           | 4.44<br>4.58                                                             | 2<br>3                                        |
| Proteasome subunit beta type 4 precursor             | P99026            | M.RVNDSTMLGASGDY@ADF.Q<br>R.VNDSTMLGASGDY@ADFQYLK.Q                                                                                                                                                                                                                                           | Y102<br>Y102                                                                                   | N<br>U                                                  | 17,18<br>3,4,7,8,10                                                                                          | 2<br>5                                         | 7                | 4.81<br>4.81                                                             | 2<br>2                                        |
| Proteasome subunit beta type 5 precursor             | O55234            | K.RGPGLY@YVDSEGNR.I<br><br>R.GPGLY@YVDSEGNR.I<br>W.DKRGPGLY@YVDSEGNRISGTAF.S<br>R.AIY@QATYR.D<br>R.DAYSQGGAVNLY@HVR.E<br>R.DAYSQGGAVNLY@HVREDGWIR.V                                                                                                                                           | Y116<br><br>Y116<br>Y116<br>Y165<br>Y181<br>Y181                                               | Y<br>U<br><br>N*<br>Y<br>U<br>U                         | 1,2,4<br><br>2,3,4,5,7<br>11<br>1,3,4,6,8,9,10<br>2<br>1,2,3,5,10                                            | 3<br>1<br>6<br>1<br>7<br>1<br>5                | 11<br><br>7<br>6 | 3.86<br>2.98<br>3.54<br>3.07<br>2.71<br>3.54<br>3.03                     | 2<br>3<br>2<br>3<br>2<br>2<br>3               |
| Proteasome subunit beta type 7 precursor             | P70195            | L.VLGGVDVTGPHLY@SIYPHGSTDKLPY.V                                                                                                                                                                                                                                                               | Y154                                                                                           | N<br>U                                                  | 11,12,18                                                                                                     | 3                                              | 3                | 4.40                                                                     | 3                                             |
| <b>Other proteolytic regulators</b>                  |                   |                                                                                                                                                                                                                                                                                               |                                                                                                |                                                         |                                                                                                              |                                                |                  |                                                                          |                                               |
| Probable ubiquitin carboxyl-terminal hydrolase FAF-X | P70398            | K.VISSVSY@YTHR.H<br>F.NDY@FEFPRELMEPY.T<br>K.FNDY@FEFPR.E<br>K.FNDY@FEFPRELMEPYTVAGVAKL<br>R.PY@T@GNPQYTY@NNWSPVQSNETSNGYFLER.S<br>R.RPYTGNPQY@TYNNWSPVQSNETSNGYFLER.S<br>R.RPYTGNPQYT@Y@NNWSPVQSNETSNGYFLER.S<br>R.RPYTGNPQYTY@NNWSPVQSNETSNGYFLER.S<br>R.RPYTGNPQYT*Y@NNWSPVQSNETSNGYFLER.S | Y367<br>Y1815<br>Y1815<br>Y1815<br><br>Y2431,Y2439<br><br>Y2437<br>Y2439<br><br>Y2439<br>Y2439 | Y<br>Y<br>U<br>U<br><br>Y<br>U<br>Y<br>U<br><br>N*<br>U | 3,7,9,10<br>12,14<br>1,2,7,9,10<br>1,8<br><br>7,9<br><br>2,3<br>2,7,9,10<br><br>1,2,3,4,5,6,7,8,9,10<br>2,10 | 4<br>2<br>5<br>2<br><br>2<br>2<br>4<br>12<br>2 | 4<br>9           | 2.88<br>3.69<br>3.12<br>5.97<br><br>4.10<br>5.48<br>4.31<br>7.26<br>4.85 | 2<br>2<br>2<br>3<br><br>3<br>3<br>3<br>3<br>3 |
| Prolyl endopeptidase                                 | Q9QUR6            | R.MTELY@DYPK.Y<br>R.MTELY@DYPKYSC*HFK.K<br>Y.KERM#TELY@DYPKY.S<br>Y.KERMTELY@DYPKY.S                                                                                                                                                                                                          | Y71<br>Y71<br>Y71<br>Y71                                                                       | N*<br>C                                                 | 2,4,5,6,7,8,9<br>10<br>11,17<br>11,12,13,15                                                                  | 7<br>1<br>2<br>1<br>3                          | 14               | 3.00<br>3.15<br>2.93<br>4.15<br>2.95                                     | 2<br>3<br>3<br>3<br>2                         |
| <b>NUCLEAR PROTEINS</b>                              |                   |                                                                                                                                                                                                                                                                                               |                                                                                                |                                                         |                                                                                                              |                                                |                  |                                                                          |                                               |
| Histone H2B type 1-B                                 | Q64475            | R.KESYSVYVY@K.V                                                                                                                                                                                                                                                                               | Y43                                                                                            | Y<br>U                                                  | 5,6,7,8,9,10                                                                                                 | 6                                              | 6                | 3.92                                                                     | 2                                             |
| Histone H4                                           | P62806            | K.RISGLIY@EETRGLV.K<br>R.ISGLIY@EETR.G                                                                                                                                                                                                                                                        | Y51<br>Y51                                                                                     | N<br>U                                                  | 11<br>1,2,3,4,5,7,8,9,10                                                                                     | 1<br>11                                        | 12               | 3.72<br>3.51                                                             | 2<br>2                                        |
| Nucleolar protein 10                                 | Q5RJG1            | K.MGIY@YIPVLGPAPR.W                                                                                                                                                                                                                                                                           | Y339                                                                                           | N*<br>U                                                 | 1                                                                                                            | 1                                              | 1                | 3.28                                                                     | 2                                             |
| Nucleolin                                            | P09405            | R.SVSLY@YTGEK.G                                                                                                                                                                                                                                                                               | Y464                                                                                           | N*<br>U                                                 | 1,3                                                                                                          | 2                                              | 2                | 2.47                                                                     | 2                                             |
| PREDICTED: scaffold attachment factor B              | UPI00001E3<br>C2C | R.RDDAY@WPEAK.R                                                                                                                                                                                                                                                                               | Y723                                                                                           | N*<br>U                                                 | 2                                                                                                            | 1                                              | 1                | 2.19                                                                     | 2                                             |
| SET protein                                          | Q9EQU5            | F.YFDENPY@FENKVL.S<br>R.IDFYFDENPY@FENK.V<br>R.IDFYFDENPY@FENKVL.SK.E<br><br>Y.RIDFYFDENPY@FENKVL.S<br>Y.FDENPY@FENKVL.S                                                                                                                                                                      | Y145<br>Y145<br>Y145<br><br>Y145<br>Y145                                                       | N*<br>U                                                 | 11<br>1,2,3,4,5,7,8,9,10<br>3,4,5<br><br>11,12<br>14                                                         | 1<br>13<br>2<br>1<br>2<br>1                    | 20               | 2.38<br>4.74<br>3.07<br>4.91<br>5.43<br>2.80                             | 2<br>2<br>3<br>2<br>2<br>2                    |
| Structural maintenance of chromosome 3               | Q9CW03            | Y.IEERLHLEEEKEELAQY@QKW.D                                                                                                                                                                                                                                                                     | Y213                                                                                           | N*<br>U                                                 | 11                                                                                                           | 1                                              | 1                | 3.38                                                                     | 3                                             |
| Telomerase-binding protein EST1A                     | P61406            | K.FQNSDNPY@YYPR.T                                                                                                                                                                                                                                                                             | Y507                                                                                           | N*<br>U                                                 | 1,2,3,4,5,6,7,8                                                                                              | 8                                              | 8                | 4.27                                                                     | 2                                             |
| Translin                                             | Q62348            | K.KVEEVY@DLSIR.G                                                                                                                                                                                                                                                                              | Y210                                                                                           | N*<br>U                                                 | 5                                                                                                            | 1                                              | 1                | 2.21                                                                     | 2                                             |
| <b>MISCELLANEOUS</b>                                 |                   |                                                                                                                                                                                                                                                                                               |                                                                                                |                                                         |                                                                                                              |                                                |                  |                                                                          |                                               |
| Catalase                                             | P24270            | K.GAGAFGY@FEVTHDITR.Y<br>K.LVNADGEAVY@C*K.F                                                                                                                                                                                                                                                   | Y83<br>Y230                                                                                    | N*<br>N<br>U<br>U                                       | 2<br>2                                                                                                       | 1<br>1                                         | 1<br>1           | 3.36<br>3.68                                                             | 2<br>2                                        |
| DNA dC->dU editing enzyme APOBEC-3                   | Q99J72            | K.HLC*Y@YHR.M                                                                                                                                                                                                                                                                                 | Y255                                                                                           | Y<br>U                                                  | 1,2,3,4,5,6,8,9,10                                                                                           | 1<br>12                                        | 22               | 2.70<br>2.44                                                             | 3<br>2                                        |



|                                                                         |                   |                                                                                                                                                                                        |                                                                   |                        |                       |                                                                                                             |                                  |                |                                                      |                                 |
|-------------------------------------------------------------------------|-------------------|----------------------------------------------------------------------------------------------------------------------------------------------------------------------------------------|-------------------------------------------------------------------|------------------------|-----------------------|-------------------------------------------------------------------------------------------------------------|----------------------------------|----------------|------------------------------------------------------|---------------------------------|
|                                                                         |                   | R.VKHLC*Y@YHR.M<br>Y.NQRVKHLC*Y@Y.H<br>K.HLC*YY@HR.M<br>Y.NQRVKHLC*YY@.H                                                                                                               | Y255<br>Y255<br>Y256<br>Y256                                      | Y                      | U                     | 1,2,3,4,5,9,10<br>11,17<br>5<br>12,15,18                                                                    | 7<br>2<br>1<br>3                 | 4              | 3.54<br>3.01<br>2.10<br>2.97                         | 3<br>2<br>2<br>2                |
| Pol polyprotein [Moloney murine leukemia virus (MoMLV); Mus musculus]   | P03355            | L.AAAY@QEQLDRPVVPHPY.R<br>H.PY@RVGDTVW.V<br>L.AAAY@QEQLDRPVVPHPY@RVGDTVW.V<br>L.AAAYQEQLDRPVVPHPY@RVGDTVW.V<br>Y.QEQLDRPVVPHPY@RVGDTVW.V<br>K.NLEPRWKGPY@TVL.L<br>R.WKGPY@TVLLTPTALK.V | Y1105<br>Y1118<br>Y1105,Y1118<br>Y1118<br>Y1118<br>Y1142<br>Y1142 | Y<br>Y<br>Y<br>Y<br>Y  | U<br>U<br>U<br>U<br>U | 11,12,14,17<br>11,12,14,15,16<br>11,12,14,15,16,17,18<br>12,16,17<br>18<br>11,13,16<br>1,2,3,4,5,6,7,8,9,10 | 4<br>9<br>7<br>3<br>1<br>3<br>11 | 11<br>20<br>14 | 4.22<br>2.73<br>4.38<br>4.66<br>2.71<br>2.24<br>4.62 | 3<br>2<br>3<br>3<br>3<br>2<br>2 |
| Serpin B6                                                               | Q60854            | K.FKLEENYNMNDALY@KLGMTDAFGGR.A<br>Y.NMNDALY@KLGMTDAF.G                                                                                                                                 | Y289<br>Y289                                                      | Y                      | U                     | 2<br>12,14                                                                                                  | 1<br>2                           | 3              | 5.18<br>4.10                                         | 3<br>2                          |
| Voltage-dependent anion-selective channel protein 1                     | Q60932            | K.YRWTEY@GLTFTEK.W                                                                                                                                                                     | Y80                                                               | N*                     | U                     | 10                                                                                                          | 1                                | 1              | 2.83                                                 | 2                               |
| <b>FUNCTION UNKNOWN OR UNCERTAIN</b>                                    |                   |                                                                                                                                                                                        |                                                                   |                        |                       |                                                                                                             |                                  |                |                                                      |                                 |
| <b>Named proteins of unknown/uncertain function</b>                     |                   |                                                                                                                                                                                        |                                                                   |                        |                       |                                                                                                             |                                  |                |                                                      |                                 |
| Ankyrin repeat domain-containing protein 25                             | Q8BX02            | L.HVPAPFPGTPGQASPAAFPSKEPDPY@S@VETP<br>YGY.R<br>L.HVPAPFPGTPGQASPAAFPSKEPDPY@SVETPY<br>GY.R                                                                                            | Y32<br>Y32                                                        | Y                      | U                     | 15,17<br>18                                                                                                 | 2<br>1                           | 3              | 4.26<br>4.63                                         | 3<br>3                          |
| Anthrax toxin receptor 1 precursor                                      | Q9CZ52            | K.WPTVDASY@YGGR.G                                                                                                                                                                      | Y380                                                              | N*                     | U                     | 4,7                                                                                                         | 2                                | 2              | 2.30                                                 | 2                               |
| ApoA-I binding protein                                                  | Q8K4Z3            | K.KYQLNLPSPDTEC*VY@RLQ.-<br>K.YQLNLPSPDTEC*VY@RLQ.-<br>K.YQLNLPSPDTEC*VY@RLQ.-                                                                                                         | Y279<br>Y279<br>Y279                                              | Y                      | U                     | 1,2,3,4,6,7,8,10<br>4<br>7                                                                                  | 8<br>1<br>1                      | 10             | 4.48<br>3.01<br>3.42                                 | 3<br>3<br>2                     |
| Ataxin-2                                                                | O70305            | K.GLPQPTISFDGIY@ANVR.M<br>R.VALENDRSEEEKY@TAVQR.N<br>R.VALENDRS*EEEEKY@TAVQR.N                                                                                                         | Y233<br>Y440                                                      | Y<br>Y                 | U<br>U                | 2,3,8<br>1,3,4,5,8,9,10<br>7                                                                                | 3<br>7<br>1                      | 3<br>8         | 4.42<br>4.14<br>3.23                                 | 2<br>3<br>3                     |
| Ataxin-2-like protein                                                   | Q7TQH0            | K.GPPQSPVFEGVY@NNSR.M                                                                                                                                                                  | Y116                                                              | N*                     | U                     | 2,7,8                                                                                                       | 3                                | 3              | 4.24                                                 | 2                               |
| BAT2-ISO homolog [fragment] (Bat2d)                                     | Q8BMJ4            | R.M#MWGSDPY@HAEPQQAATPK.S<br>R.MM#WGSDDPY@HAEPQQAATPK.S<br>R.MMWGSDDPY@HAEPQQAATPK.S                                                                                                   | Y788<br>Y788<br>Y788                                              | Y                      | U                     | 3,5<br>3<br>1,2,3,4,5                                                                                       | 2<br>1<br>4<br>3                 | 10             | 3.75<br>3.16<br>3.65<br>4.77                         | 3<br>3<br>3<br>2                |
| Carnitine deficiency-associated protein CDV3A (CDV3B)                   | Q920I4            | L.TTTRKTPQGPEIY@SDTQFSLQ.S<br>R.KTPQGPEIY@SDTQFSLQSTAK.H                                                                                                                               | Y213<br>Y213                                                      | N                      | C                     | 11,12<br>1,2,3,4,5,6,7,8,9,10                                                                               | 2<br>11<br>1                     | 14             | 2.95<br>5.88<br>2.71                                 | 3<br>3<br>2                     |
| Centrosomal protein 170                                                 | UPI0000D62<br>DCC | K.HVEGQSAASEEALFPFC*REPSY@FEIPTK.E                                                                                                                                                     | Y240                                                              | Y                      | U                     | 1,2                                                                                                         | 2                                | 2              | 5.12                                                 | 3                               |
| DENN/MADD domain containing 2C                                          | Q6P9P8            | K.SLENIY@YEPEGQEC*GPSINPLPKPR.R                                                                                                                                                        | Y185                                                              | Y                      | U                     | 1,2                                                                                                         | 2                                | 2              | 5.06                                                 | 3                               |
| Dihydropyrimidinase-related protein 2                                   | O08553            | K.THNSALEY@NIFEGMEC*R.G                                                                                                                                                                | Y431                                                              | N*                     | U                     | 1,6,9,10                                                                                                    | 3<br>1                           | 4              | 3.69<br>5.25                                         | 3<br>2                          |
| Discoidin, CUB and LCCL domain containing protein 2 precursor -- DCBLD2 | Q91ZV3            | K.SAATPEELVY@QVPQSTQELSGAGR.D                                                                                                                                                          | Y744                                                              | N                      | U                     | 4                                                                                                           | 1                                | 1              | 3.96                                                 | 3                               |
| Discs, large homolog 5                                                  | Q3UGX5            | Y.KEERDAVY@SEY.K                                                                                                                                                                       | Y429                                                              | Y                      | U                     | 15,18                                                                                                       | 2                                | 2              | 2.56                                                 | 2                               |
| Far upstream element binding protein 3 (FUSE binding protein 3) homolog | Q3TIX6            | K.IDSIPHLNNSLPLVDPS@VY@GYGVQKRA                                                                                                                                                        | Y51                                                               | N*                     | U                     | 8,9                                                                                                         | 2                                | 2              | 3.27                                                 | 3                               |
| GPI-anchored protein p137 - p137GPI                                     | Q60865            | F.TAPRDY@SGY.Q                                                                                                                                                                         | Y609                                                              | Y                      | U                     | 11,12,15,16,17,18                                                                                           | 6                                | 6              | 2.80                                                 | 2                               |
| Grb10 interacting GYF protein 2                                         | Q6Y7W8            | F.LKEVESPY@EVHDY.T<br>F.LKEVESPY@EVHDYTRAY.L                                                                                                                                           | Y1174<br>Y1174                                                    | Y                      | U                     | 11,12,15,16,17<br>11,13,15,16,17,18                                                                         | 4<br>1<br>1<br>5                 | 11             | 3.91<br>4.01<br>4.23<br>4.72                         | 2<br>3<br>2<br>3                |
| High glucose-regulated protein 8                                        | Q8K325            | K.DGLNDDDFEY@LSPQAR.P                                                                                                                                                                  | Y37                                                               | N                      | U                     | 1,2,3,4,6,7,8,9,10                                                                                          | 9                                | 9              | 4.63                                                 | 2                               |
| Large proline-rich protein BAT2                                         | Q7TSC1            | K.KYSSLNLFDTY@KGGK.S<br>K.YSSLNLFDTY@KGGK.S<br>K.APPSTY@SGVFR.T<br>R.LKAPPSTY@SGVFR.T<br>R.IDLY@QQASPPDALR.W                                                                           | Y26<br>Y26<br>Y2098<br>Y2098<br>Y2110                             | Y<br>Y<br>Y<br>Y<br>N* | U<br>U<br>U<br>U<br>U | 2<br>1,2,3,4,5<br>1,2,3<br>1,2,4<br>4                                                                       | 1<br>1<br>5<br>4<br>3<br>1<br>1  | 7<br>8         | 3.13<br>2.75<br>3.77<br>2.89<br>3.65<br>2.72<br>2.72 | 3<br>3<br>2<br>2<br>3<br>2<br>2 |
| Leucine rich repeat (in FLII) interacting protein 2 (Lrrfp2) [fragment] | Q8C062            | R.DIY@DLKDOIHDVEGR.Y                                                                                                                                                                   | Y5                                                                | N*                     | U                     | 1,2,3,4,7                                                                                                   | 5                                | 5              | 4.88                                                 | 3                               |

|                                                                                             |                |                                                                                                                                                                                                                     |                                                               |                             |                            |                                                                                                       |                                           |                    |                                                                              |                                           |
|---------------------------------------------------------------------------------------------|----------------|---------------------------------------------------------------------------------------------------------------------------------------------------------------------------------------------------------------------|---------------------------------------------------------------|-----------------------------|----------------------------|-------------------------------------------------------------------------------------------------------|-------------------------------------------|--------------------|------------------------------------------------------------------------------|-------------------------------------------|
| Mage-d2                                                                                     | Q99PB4         | R.VPNSNPPEY@EFFWGLR.S                                                                                                                                                                                               | Y439                                                          | N*                          | U                          | 1                                                                                                     | 1                                         | 1                  | 3.86                                                                         | 2                                         |
| Nsun2 protein                                                                               | Q91YX9         | R.LAQEGIY@TLYPFINSR.I                                                                                                                                                                                               | Y372                                                          | N*                          | U                          | 6                                                                                                     | 1                                         | 1                  | 4.21                                                                         | 2                                         |
| OTU domain containing 4 protein -- Otud4; PREDICTED: HIV-1 induced protein HIN-1 isoform 1; | UPI0000218 B34 | K.DSSAMC*QSLLY@ELLYEK.V<br>R.ESY@YFGLSPEER.R<br>R.ESYY@FGLSPEER.R<br>R.LLY@EIQNR.D<br>R.LLY@EIQNRDEQAFALSSSSVSQSPQNSNAC*V<br>PR.K                                                                                   | Y169<br>Y436<br>Y437<br>Y458<br>Y458                          | Y<br>Y<br>Y<br>Y            | U<br>U<br>U<br>U           | 4,9,10<br>1,2,3,4,5,6,7,8,9,10<br>1,2,4<br>1,2,3,4,5,6,7,8,9,10<br>2,3,5,7,9,10                       | 3<br>10<br>3<br>10<br>6                   | 3<br>10<br>3<br>16 | 4.26<br>3.30<br>3.25<br>3.28<br>6.61                                         | 2<br>2<br>2<br>2<br>3                     |
| Pericentriolar material gene 1 protein [fragment]                                           | Q91Y51         | K.SNRVPS*ADGNY@RPLAK.T                                                                                                                                                                                              | Y961                                                          | N*                          | U                          | 1                                                                                                     | 1                                         | 1                  | 3.72                                                                         | 3                                         |
| Periodic tryptophan protein 1 homolog -- Pwp1                                               | Q9D6T6         | R.VTWNHFSPC*HFLASTDDGFVY@NLDAR.S                                                                                                                                                                                    | Y367                                                          | Y                           | U                          | 1,5,8                                                                                                 | 3                                         | 3                  | 5.70                                                                         | 3                                         |
| Pleckstrin homology-like domain, family B, member 2 -- PHLDB2                               | Q8K1N2         | K.ADLDHY@TGRDSE.R<br>K.SHDSVY@FLGGLEGR.K<br>R.NKSHDSVY@FLGGLEGR.K                                                                                                                                                   | Y130<br>Y161<br>Y161                                          | N<br>N*                     | U<br>U                     | 1,3,4,10<br>4<br>2                                                                                    | 4<br>1<br>1                               | 4<br>2             | 3.53<br>1.90<br>3.63                                                         | 3<br>2<br>3                               |
| Protein FAM51A1                                                                             | Q8BHE1         | R.LNDY@VNADHGLY@FNHR.R<br>R.LNDY@VNADHGLY@FNHR.R<br>R.LNDYVNADHGLY@FNHR.R                                                                                                                                           | Y167,Y175<br>Y167,Y175<br>Y175                                | Y<br>Y<br>Y                 | U<br>U<br>U                | 2,3,7<br>1,2,3,4,5<br>1,2                                                                             | 3<br>5<br>2                               | 8                  | 2.93<br>3.77<br>3.52                                                         | 3<br>3<br>3                               |
| PYM protein                                                                                 | Q8CHP5         | R.VKEGYVPQEEVPVYENKY@VK.F                                                                                                                                                                                           | Y49                                                           | N*                          | U                          | 7                                                                                                     | 1                                         | 1                  | 3.13                                                                         | 3                                         |
| Suppression of tumorigenicity 5                                                             | Q924W7         | K.STLEENAY@EDIVGGLPKENPY@EDVDLK.N                                                                                                                                                                                   | Y485,Y498                                                     | N*,N*                       | U,C                        | 2,8,9                                                                                                 | 3                                         | 3,3                | 4.37                                                                         | 3                                         |
| SR-related CTD associated factor 6                                                          | Q8CGZ0         | R.NSEGWEQNGLY@EFFR.A                                                                                                                                                                                                | Y723                                                          | N*                          | U                          | 1,2,3,4,5,6,7,8,9,10                                                                                  | 10                                        | 10                 | 4.52                                                                         | 2                                         |
| Tanc2 protein [fragment]                                                                    | Q5EBP6         | K.TNNAQNGHLEDDY@YSPHGMLANGSR.G                                                                                                                                                                                      | Y1349                                                         | N*                          | U                          | 1                                                                                                     | 1                                         | 1                  | 5.38                                                                         | 3                                         |
| Testis derived transcript                                                                   | Q921W7         | K.HTM#NEGEPAIY@AER.A<br>K.HTMNEGEPAIY@AER.A                                                                                                                                                                         | Y249<br>Y249                                                  | Y                           | U                          | 3<br>1,2,3,4                                                                                          | 1<br>4<br>4                               | 9                  | 1.96<br>3.76<br>4.54                                                         | 2<br>3<br>2                               |
| Trinucleotide repeat containing 6b                                                          | Q6NVE4         | K.DLGTDDSGPY@FEK.G<br>K.DLGTDDSGPY@FEKGSHGLFGNSTAQSR.G<br>K.GIQNDPESDPY@VTPGVLGGTTTSPIVDTHQL<br>LR.D                                                                                                                | Y1128<br>Y1128<br>Y1440                                       | N*                          | U                          | 1,4<br>1,3<br>2                                                                                       | 2<br>2<br>1                               | 4                  | 2.80<br>4.44<br>3.19                                                         | 2<br>3<br>3                               |
| Tripartite motif protein 16                                                                 | Q99PP9         | F.DC*KFSEPVY@AAF.W<br>K.FSEPVY@AAFWSL.K                                                                                                                                                                             | Y523<br>Y523                                                  | Y                           | U                          | 11<br>1                                                                                               | 1<br>1                                    | 2                  | 1.92<br>3.06                                                                 | 2<br>2                                    |
| Tudor domain-containing protein 3                                                           | Q91W18         | L.SNIKPVQTEAWEEEGTY@DHTIEF.R                                                                                                                                                                                        | Y618                                                          | Y                           | U                          | 14,15,17                                                                                              | 3                                         | 3                  | 5.00                                                                         | 3                                         |
| Ubiquitin-associated protein 2 - UBAP2                                                      | Q91VX2         | R.LPMDY@YGIPFAAPTALASR.D<br>R.LPM#DY@YGIPFAAPTALASR.D<br>R.LPMDY@YGIPFAAPTALASR.D<br>F.AAPTALASRDGNLANNPY@SGDVTKF.G<br>L.ASRDGNLANNPY@SGDVTKF.G<br>N.NPY@SGDVTKF.G<br>R.DGNLANNPY@SGDVTK.F<br>K.SQASKPTY@GSAPYWTN.- | Y853<br>Y853<br>Y854<br>Y876<br>Y876<br>Y876<br>Y876<br>Y1124 | N<br>N<br>N<br>N<br>N<br>N* | U<br>U<br>U<br>U<br>U<br>U | 1,2,4,5,6,7,8,9,10<br>7<br>7,8,9,10<br>11,12,13,16,18<br>11,12,15<br>12<br>1,2,3,4,7,8,9,10<br>2,9,10 | 9<br>2<br>1<br>4<br>5<br>2<br>1<br>9<br>4 | 12<br>4<br>18      | 5.84<br>4.23<br>3.85<br>5.57<br>5.85<br>6.06<br>4.39<br>2.95<br>4.67<br>3.73 | 2<br>3<br>2<br>2<br>3<br>2<br>3<br>2<br>2 |
| Ubiquitin associated protein 2-like -- UBAP2L                                               | Q80X50         | Y.TSQNNAQGPLY@EQRSTQ.T<br>R.FPLDY@YISPFPTPTPLTGR.D<br>R.DGLASNPNY@SGDLTK.F<br>L.TGRDGLASNPNY@SGDLTK.F                                                                                                               | Y612<br>Y854<br>Y878<br>Y878                                  | Y<br>N<br>Y<br>Y            | U<br>U<br>U<br>U           | 11,12,13,14,15,16,17,18<br>9<br>1,2,3,4,5,7,8,9,10<br>11,12,13,14,16,17,18                            | 4<br>9<br>9<br>7                          | 13<br>1<br>16      | 3.89<br>4.53<br>3.99<br>4.27<br>5.79                                         | 3<br>2<br>2<br>2<br>2                     |
| Yippee-like 5                                                                               | Q65Z92         | N.S@KLGWIY@EFATEDSQRY.K                                                                                                                                                                                             | Y84                                                           | Y                           | U                          | 11,13                                                                                                 | 2                                         | 2                  | 3.20                                                                         | 2                                         |
| YTH domain protein 3 -- Ythdf3                                                              | Q6NXJ8         | K.SVDYNAY@AGVWSQDKWK.G                                                                                                                                                                                              | Y488                                                          | Y                           | U                          | 1,2,3,4,5                                                                                             | 5                                         | 5                  | 5.20                                                                         | 2                                         |
| Novel ZZ type zinc finger domain containing protein                                         | Q5SSH7         | K.WKDFELPGDTLY@YR.F<br>W.KDFELPGDTLY@Y.R                                                                                                                                                                            | Y2706<br>Y2706                                                | Y                           | U                          | 1,2,3,4,5,6,9,10<br>15,16,17,18                                                                       | 7<br>7<br>4                               | 18                 | 4.42<br>4.89<br>2.92                                                         | 3<br>2<br>2                               |
| <b>Unnamed proteins of unknown/uncertain function</b>                                       |                |                                                                                                                                                                                                                     |                                                               |                             |                            |                                                                                                       |                                           |                    |                                                                              |                                           |
| BC003940 protein [fragment]                                                                 | Q8QZS4         | R.FIY@EAWQGV.R                                                                                                                                                                                                      | Y70                                                           | Y                           | U                          | 1,2,3,6,7,8,9,10                                                                                      | 8                                         | 8                  | 4.44                                                                         | 2                                         |
| BC053440 protein [fragment]                                                                 | Q8R2W2         | K.INDTMY@FAPSMK.D                                                                                                                                                                                                   | Y19                                                           | Y                           | U                          | 4,5                                                                                                   | 2                                         | 2                  | 3.62                                                                         | 2                                         |
| Hypothetical ATP/GTP-binding site motif A homolog                                           | Q3UHH1         | L.HKTKEAAPVGEEDDYQAY@Y.L                                                                                                                                                                                            | Y729                                                          | Y                           | U                          | 11,12,15,16,17,18                                                                                     | 6                                         | 8                  | 4.68                                                                         | 3                                         |

|                                                                                                                                                                              |                   |                                                                                                                                                                                                 |                                      |    |   |                                 |                       |        |                                      |                       |
|------------------------------------------------------------------------------------------------------------------------------------------------------------------------------|-------------------|-------------------------------------------------------------------------------------------------------------------------------------------------------------------------------------------------|--------------------------------------|----|---|---------------------------------|-----------------------|--------|--------------------------------------|-----------------------|
| hypothetical ATP/GTP-binding site motif A (P-loop)/Zinc finger C-x8-C-x5-C-x3-H type containing protein                                                                      | Q9DBS7            | K.EAVY@SGVQSLR.S                                                                                                                                                                                | Y508                                 | N  | U | 2,9,10                          | 3                     | 3      | 2.28                                 | 2                     |
| hypothetical Domain of unknown function DUF71 containing protein                                                                                                             | Q9CQ28            | R.VYTQC*EGDEVEDLY@ELLK.L                                                                                                                                                                        | Y97                                  | N  | U | 7,8,9,10                        | 4                     | 4      | 5.08                                 | 2                     |
| hypothetical G-protein beta WD-40 repeat/Trp-Asp (WD) repeats profile/Trp-Asp (WD) repeats circular profile/Serine-rich region profile/WD40-like containing protein -- WDR70 | Q3TWF6            | K.AAEDNPY@WVSPAYSK.T                                                                                                                                                                            | Y621                                 | N* | U | 2                               | 1                     | 1      | 3.53                                 | 2                     |
| hypothetical 5'3'-Exonuclease N- and I-domains containing protein                                                                                                            | Q8BM14            | R.LQENC*GANTSPLY@SFSK.A                                                                                                                                                                         | Y747                                 | Y  | U | 1,2,3                           | 3                     | 3      | 4.13                                 | 2                     |
| DNA segment, Chr 5, ERATO Doi 585, expressed -- D5Erd585e                                                                                                                    | Q6P1H6            | R.IREYLM#GHY@YVPLLR.A<br>R.IREYLMGHY@YVPLLR.A                                                                                                                                                   | Y483<br>Y483                         | Y  | U | 6,7<br>1,2,3,5,6,7              | 2<br>6                | 8      | 3.36<br>4.63                         | 3<br>3                |
| hypothetical protein: E230015L20Rik protein                                                                                                                                  | Q8C304            | R.TNEIY@YLDPDAPLSPSTQDNQYQK.S                                                                                                                                                                   | Y416                                 | Y  | U | 1,2,4,5,10                      | 5                     | 5      | 4.33                                 | 3                     |
| hypothetical protein LOC106840                                                                                                                                               | Q8C4B4            | K.PEDNVY@SIDFTR.F<br>R.VTENYLC*KPEDNVY@SIDFTR.F                                                                                                                                                 | Y92<br>Y92                           | Y  | U | 5,6<br>1,2,5,6,8                | 2<br>5                | 7      | 3.80<br>5.27                         | 2<br>3                |
| PREDICTED: zinc finger protein 650                                                                                                                                           | UPI0000D65<br>C57 | K.KLPIAEEQIY@PWDTC*AAVHDVRL                                                                                                                                                                     | Y335                                 | Y  | U | 1,3                             | 2                     | 2      | 4.09                                 | 3                     |
| PREDICTED: similar to Oligophrenin 1                                                                                                                                         | UPI0000D66<br>8EB | K.LWLEAMDGKEPIY@TLPAlSK.K<br>R.KLWLEAM#DGKEPIY@TLPAlSK.K<br>R.KLWLEAMDGKEPIY@TLPAlSK.K                                                                                                          | Y371<br>Y371<br>Y371                 | Y  | C | 1,2,8<br>6<br>1,10              | 3<br>1<br>2           | 6      | 4.16<br>3.72<br>4.65                 | 3<br>3<br>3           |
| PREDICTED: similar to ring finger and KH domain containing 2                                                                                                                 | UPI0000428<br>93E | R.LSEQGGDFGY@SGYLFPGYGVGK.Q                                                                                                                                                                     | Y188                                 | Y  | U | 2,3,5,6,7,9,10                  | 7                     | 7      | 5.48                                 | 2                     |
| hypothetical protein 1500002O20Rik                                                                                                                                           | Q9DB90            | K.EGQRPTQPVY@QIQNR.G                                                                                                                                                                            | Y147                                 | N  | U | 2                               | 1                     | 1      | 2.69                                 | 3                     |
| MKIAA0183 protein [fragment]                                                                                                                                                 | Q6A0A9            | K.PAVPQVPSPGGTPGQAPYPY@SLSEPALTLDTSG<br>K.N<br>K.PAVPQVPS@PGGTGQAPYPY@SLSEPALTLDTSG<br>GK.N<br>K.PAVPQVPSPGGT@PGQAPYPY@SLSEPALTLDTSG<br>GK.N<br>F.GGHY@GETVATGPY@RAF.R<br>F.GGHYGETVATGPY@RAF.R | Y457<br>Y457<br>Y457<br>Y968<br>Y968 | Y  | U | 1,2,4,6,7<br>7<br>1<br>11<br>11 | 5<br>1<br>1<br>1<br>1 | 7<br>2 | 4.65<br>4.00<br>4.33<br>3.02<br>3.62 | 3<br>3<br>3<br>2<br>2 |
| Protein FAM125A                                                                                                                                                              | Q78HU3            | R.RTDSIY@EASS@LYGISAMDGVPFTLHPR.F                                                                                                                                                               | Y202                                 | N  | U | 2                               | 1                     | 1      | 4.42                                 | 3                     |
| PREDICTED: similar to la related protein isoform 1                                                                                                                           | UPI0000D66<br>C58 | R.THFDYQFGY@R.K                                                                                                                                                                                 | Y412                                 | N* | U | 1,2,5,6,8,9,10                  | 7                     | 7      | 3.15                                 | 2                     |
| Similar to leucine-rich neuronal protein homolog                                                                                                                             | Q3U222            | L.GFGSC*HEELY@SGRPY.G                                                                                                                                                                           | Y203                                 | Y  | U | 11,17                           | 2<br>1                | 3      | 3.22<br>3.45                         | 3<br>2                |
| Similar to RIKEN cDNA 4930527D15 gene [fragment]                                                                                                                             | Q922B5            | K.EKLLLC*HGPS@LSLPALSGVRY@NAEK.K                                                                                                                                                                | Y39                                  | Y  | C | 1,2,3                           | 3                     | 3      | 3.69                                 | 3                     |

**END**

**Table S2. Phosphotyrosine sites from the Src-transformed mouse embryo fibroblast population**

| Protein Name(s) <sup>a</sup>                                                    | UniProt # <sup>a</sup> | Peptide <sup>b</sup>                                                                                                                                                                                                         | pY site(s) <sup>b</sup>                                                       | MH <sup>h</sup>                                                                                                        | dM <sup>h</sup>                                                                          | ΔCn 2nd ranked peptide <sup>i</sup>                                                                                                                                                                                                 |
|---------------------------------------------------------------------------------|------------------------|------------------------------------------------------------------------------------------------------------------------------------------------------------------------------------------------------------------------------|-------------------------------------------------------------------------------|------------------------------------------------------------------------------------------------------------------------|------------------------------------------------------------------------------------------|-------------------------------------------------------------------------------------------------------------------------------------------------------------------------------------------------------------------------------------|
| <b>SIGNALING: PROTEIN KINASES AND PHOSPHATASES</b>                              |                        |                                                                                                                                                                                                                              |                                                                               |                                                                                                                        |                                                                                          |                                                                                                                                                                                                                                     |
| <b>Tyrosine kinases (nonreceptor)</b>                                           |                        |                                                                                                                                                                                                                              |                                                                               |                                                                                                                        |                                                                                          |                                                                                                                                                                                                                                     |
| Rous sarcoma oncogene, isoform 2 -- Src (Yes) (Fyn)                             | Q80XU2                 | F.VALY@DYESRTETDL.S<br>F.VALY@DYESRTETDLSF.K<br>R.AGPLAGGVTTFVALY@DYESR.T<br>R.TQFNLSLQQLVAY@YSK.H<br><br>L.IEDNEY@TARQGAKFPIKW.T<br>R.LIEDNEY@TAR.Q<br><br>K.FPIKWTAPEAALY@GR.F<br><br>K.WTAPEAALY@GR.F<br>W.TAPEAALY@GRF.T | Y92<br>Y92<br>Y92<br>Y231<br><br>Y418<br>Y418<br><br>Y438<br><br>Y438<br>Y438 | 1756.24<br>1990.08<br>2168.38<br>1871.54<br><br>2247.74<br>1304.34<br><br>1801.66<br>1800.72<br><br>1315.29<br>1277.18 | 1.45<br>1.19<br>1.34<br>1.63<br><br>1.64<br>0.75<br><br>1.74<br>0.80<br><br>0.67<br>1.57 | 0.1686 F.VALYDY@ESRTETDL.S<br>0.1415 F.VALYDY@ESRTETDLSF.K<br>0.1428 R.AGPLAGGVTTFVALYDY@ESR.T<br>0.1431 R.TQFNLSLQQLVAY@SK.H<br><br>0.0272 L.IEDNEY@ARQGAKFPIKW.T<br>0.0960 R.LIEDNEY@AR.Q<br><br>none<br>none<br><br>none<br>none |
| Proto-oncogene tyrosine-protein kinase LCK                                      | P06240                 | F.GLARLIEDNEY@TAREGAKFPIKW.T<br>F.GLARLIEDNEY@TAREGAKF.P<br>R.LIEDNEY@TAREGAKFPIKW.T                                                                                                                                         | Y393<br>Y393<br>Y393                                                          | 2758.06<br>2233.42<br>2361.29                                                                                          | 0.65<br>0.32<br>1.12                                                                     | 0.0692 F.GLARLIEDNEY@AREGAKFPIKW.T<br>none<br>0.0060 R.IEDNEY@AREGAKFPIKW.T                                                                                                                                                         |
| Tyrosine-protein kinase CSK                                                     | P41241                 | L.IKPKVMEGTVAQDEFY@RSGWA                                                                                                                                                                                                     | Y184                                                                          | 2494.10                                                                                                                | 1.90                                                                                     | 0.0801 L.IKPKVMEGTVAQDEFYRS@GW.A                                                                                                                                                                                                    |
| Fer                                                                             | P70451                 | K.VQENDGKEPPVNY@EEDAR.S<br>F.GMSRQEDGGVY@SSSGL.K                                                                                                                                                                             | Y402<br>Y715                                                                  | 2365.75<br>1710.81                                                                                                     | 0.68<br>1.09                                                                             | none<br>0.1669 F.GMSRQEDGGVY@SSSGL.K                                                                                                                                                                                                |
| Proto-oncogene tyrosine-protein kinase ABL1                                     | P00520                 | R.LMTGDTY@TAHAGAK.F                                                                                                                                                                                                          | Y393                                                                          | 1517.37                                                                                                                | 0.69                                                                                     | 0.0155 R.LMTGDTYT@AHAGAK.F                                                                                                                                                                                                          |
| Focal adhesion kinase, isoform 3 -- FAK                                         | P34152-3               | R.YM#EDSTY@YK.A<br>R.YMEDSTY@YK.A<br>R.YMEDSTY@YKASK.G<br>R.YMEDSTY@Y@K.A<br>R.YMEDSTY@Y@KASK.G                                                                                                                              | Y576<br>Y576<br>Y576<br>Y576.Y577<br>Y576.Y577                                | 1296.63<br>1279.91<br>1566.33<br>1359.57<br>1646.05                                                                    | 1.14<br>0.42<br>0.67<br>0.08<br>0.39                                                     | 0.0381 R.YM#EDSTY@TYK.A<br>0.0710 R.YMEDSTY@K.A<br>0.0349 R.YMEDST@YKASK.G<br>0.0699 R.YMEDST@YY@K.A<br>0.0632 R.YMEDST@YY@KASK.G                                                                                                   |
| <b>Tyrosine kinases (receptor)</b>                                              |                        |                                                                                                                                                                                                                              |                                                                               |                                                                                                                        |                                                                                          |                                                                                                                                                                                                                                     |
| Discoidin domain receptor 2 precursor -- DDR2                                   | Q62371                 | F.GMSRNLY@SGDY@Y.R<br>R.NLY@S@GDY@YR.I<br>R.NLY@SGDY@YR.I                                                                                                                                                                    | Y735.Y739<br>Y735<br>Y735.Y739                                                | 1585.96<br>1310.19<br>1310.63                                                                                          | 0.35<br>-0.33<br>0.11                                                                    | 0.0552 F.GMSRNLY@SGDY@Y.R<br>0.1053 R.NLY@SGDY@YR.I<br>none                                                                                                                                                                         |
| Ephrin type-A receptor 2 precursor                                              | Q03145                 | K.SEQLKPLKT@YVDPHTY@EDPNQAVLK.F<br>F.GLSRVLEDDPEATY@TTSGGKPIRW.T                                                                                                                                                             | Y595<br>Y773                                                                  | 3074.95<br>2842.29                                                                                                     | 1.45<br>0.87                                                                             | 0.0100 K.SEQLKPLKTY@VDPHTY@EDPNQAVLK.F<br>0.1282 F.GLSRVLEDDPEAT@YTTSGGKPIRW.T                                                                                                                                                      |
| Eph receptor B4                                                                 | Q91YM0                 | Y.LIGHGKTVY@IDPFY@EDPNEAVREF.A                                                                                                                                                                                               | Y590.Y596                                                                     | 3072.25                                                                                                                | 1.82                                                                                     | 0.0665 Y.LIGHGKTVY@IDPFY@EDPNEAVREF.A                                                                                                                                                                                               |
| Tyrosine-protein kinase receptor UFO precursor -- Axl                           | Q00993                 | K.IYNGDY@YR.Q<br>K.KIYNGDY@YR.Q                                                                                                                                                                                              | Y696<br>Y696                                                                  | 1143.81<br>1272.39                                                                                                     | 0.33<br>0.81                                                                             | 0.0650 K.IYNGDY@YR.Q<br>0.1291 K.KIYNGDY@YR.Q                                                                                                                                                                                       |
| <b>Other protein kinases</b>                                                    |                        |                                                                                                                                                                                                                              |                                                                               |                                                                                                                        |                                                                                          |                                                                                                                                                                                                                                     |
| Akt1: RAC-alpha serine/threonine-protein kinase (Akt-2) (Akt-3)                 | P31750                 | K.TFC*GTPEYLAPEVLEDNDY@GR.A                                                                                                                                                                                                  | Y326                                                                          | 2527.51                                                                                                                | 1.44                                                                                     | none                                                                                                                                                                                                                                |
| Akt-3: RAC-gamma serine/threonine-protein kinase                                | Q9WUA6                 | K.Y@Y@AM#KILKKEVIAK.D                                                                                                                                                                                                        | Y173.Y174                                                                     | 1987.81                                                                                                                | 0.72                                                                                     | none                                                                                                                                                                                                                                |
| Calcium/calmodulin-dependent protein kinase type 1 --CaM kinase I               | Q91YS8                 | R.DLKPENLLY@SLDEDSK.I                                                                                                                                                                                                        | Y150                                                                          | 2123.24<br>2122.80                                                                                                     | 1.24<br>0.80                                                                             | 0.0970 R.DLKPENLLY@YSLDEDSK.I<br>0.0165 R.DLKPENLLY@YSLDEDS                                                                                                                                                                         |
| Casein kinase I isoform alpha                                                   | Q8BK63                 | R.TLNHQDY@TFDWTMLK.Q                                                                                                                                                                                                         | Y294                                                                          | 2156.75<br>2156.72                                                                                                     | 0.80<br>0.77                                                                             | 0.1528 R.TLNHQDY@TYFDWTMLK.Q<br>0.0489 R.TLNHQDY@FDWTMLK.Q                                                                                                                                                                          |
| Casein kinase II, alpha chain                                                   | Q60737                 | K.VLGTEDLY@DYDKYNIELDPR.F                                                                                                                                                                                                    | Y255                                                                          | 2624.82                                                                                                                | 0.57                                                                                     | 0.1599 K.VLGTEDLY@DYDKYNIELDPR.F                                                                                                                                                                                                    |
| CDC2: Cell division control protein 2 homolog - CDK1 (CDK2)                     | P11440                 | K.IGEGTY@GVVYK.G<br>K.IGEGT*Y@GVVYK.G<br>K.IGEGTYGVVY@K.G<br>K.IGEGTYGVVY@KGR.H                                                                                                                                              | Y15<br>Y15<br>Y19<br>Y19                                                      | 1265.90<br>1248.05<br>1266.15<br>1479.30                                                                               | 0.28<br>0.43<br>0.53<br>0.56                                                             | 0.0999 K.IGEGT@GVVYK.G<br>none<br>0.1347 K.IGEGTY@GVVYK.G<br>0.0432 K.IGEGTY@GVVYKGR.H                                                                                                                                              |
| Dual-specificity tyrosine-phosphorylation regulated kinase 1A --DYRK1A (DYRK1B) | Q61214                 | K.HINEVY@YAK.K<br>K.VYNDGYDDNY@DYIVK.N<br>R.KVYNDGYDDNY@DYIVK.N                                                                                                                                                              | Y111<br>Y145<br>Y145                                                          | 1218.25<br>2051.96<br>2179.65                                                                                          | 1.68<br>1.13<br>0.73                                                                     | 0.1105 K.HINEVY@AK.K<br>0.1993 K.VYNDGYDDNYDY@IVK.N<br>0.1330 R.KVYNDGYDDNYDY@IVK.N                                                                                                                                                 |

|                                                                                                     |        |                                                                                                                                                                                                                                                                                                                                             |                                                             |                                                                                                 |                                                                      |                                                                                                                                                                                                                                                                                                                                                                          |
|-----------------------------------------------------------------------------------------------------|--------|---------------------------------------------------------------------------------------------------------------------------------------------------------------------------------------------------------------------------------------------------------------------------------------------------------------------------------------------|-------------------------------------------------------------|-------------------------------------------------------------------------------------------------|----------------------------------------------------------------------|--------------------------------------------------------------------------------------------------------------------------------------------------------------------------------------------------------------------------------------------------------------------------------------------------------------------------------------------------------------------------|
|                                                                                                     |        | Y.NDGYDDDN@DYIVKNGEKW.M<br>R.IYQY@IQSR.F                                                                                                                                                                                                                                                                                                    | Y145<br>Y321                                                | 2404.54<br>1151.46                                                                              | 1.56<br>0.90                                                         | none<br>none                                                                                                                                                                                                                                                                                                                                                             |
| Glycogen synthase kinase-3 beta -- GSK-3 beta (GSK-3 alpha)                                         | Q9WV60 | L.VRGEPNVSY@IC*SR.Y<br>L.VRGEPNVSY@IC*SR.Y.R<br>R.GEPNVSY@IC*SR.Y                                                                                                                                                                                                                                                                           | Y216<br>Y216<br>Y216                                        | 1781.45<br>1944.85<br>1943.83<br>1363.60                                                        | 1.65<br>1.99<br>0.97<br>2.03                                         | 0.0666 L.VRGEPNVS@YIC*SR.Y<br>0.1050 L.VRGEPNVS@YIC*SR.Y.R<br>0.0427 L.VRGEPNVS@YIC*SR.Y.R<br>0.0862 R.GEPNVSY@YIC*SR.Y                                                                                                                                                                                                                                                  |
| RIKEN CDNA C230081A13: hypothetical Protein kinase A anchoring domain containing protein -- SgK269  | Q8BX56 | K.NAIKVPVIVPNPAY@DNLAII@K.S<br>K.VPVIINPNAY@DNLAII@K.S<br>K.VPVIINPNAY@DNLAII@K.S<br>N.AIKVPVIVPNPAY@DNLAII@KSFL                                                                                                                                                                                                                            | Y632,Y638<br>Y632,Y638<br>Y638<br>Y632,Y638                 | 2505.74<br>2504.28<br>2076.41<br>1997.93<br>2625.19                                             | 2.43<br>0.97<br>-0.64<br>0.88<br>1.83                                | none<br>none<br>none<br>none<br>0.1125 N.AIKVPVIVPNPAY@DNLAIIKYS@FL                                                                                                                                                                                                                                                                                                      |
| Serine/threonine-protein kinase Nek9                                                                | Q8K1R7 | R.NKEVSWGC*GEY@GR.L                                                                                                                                                                                                                                                                                                                         | Y509                                                        | 1785.16<br>1785.91                                                                              | 0.44<br>1.18                                                         | none<br>none                                                                                                                                                                                                                                                                                                                                                             |
| Serine/threonine-protein kinase PRP4 homolog                                                        | Q61136 | K.LC*DFGSASHVADNDITPY@LVSR.F<br>H.VADNDITPY@LVSR.F                                                                                                                                                                                                                                                                                          | Y849<br>Y849                                                | 2519.30<br>1690.14                                                                              | 2.18<br>0.32                                                         | 0.0397 K.LC*DFGSASHVADNDITPY@LVSR.F<br>0.1385 H.VADNDIT@PYLVSR.F                                                                                                                                                                                                                                                                                                         |
| <b>Protein phosphatases</b>                                                                         |        |                                                                                                                                                                                                                                                                                                                                             |                                                             |                                                                                                 |                                                                      |                                                                                                                                                                                                                                                                                                                                                                          |
| Low molecular weight phosphotyrosine protein phosphatase                                            | Q9D358 | K.QLIIEDPY@YGNDSDFEVVYQQC*LR.C<br>L.GSYDPQKQLIIEDPY@YGNDSDFE<br>K.QLIIEDPY@YGNDSDFEVVYQQC*LR.C                                                                                                                                                                                                                                              | Y131<br>Y131<br>Y132                                        | 3046.44<br>2646.00<br>3045.49<br>3045.81                                                        | 2.09<br>1.85<br>1.14<br>1.46                                         | 0.0635 K.QLIIEDPY@YGNDSDFEVVYQQC*LR.C<br>0.1046 L.GSYDPQKQLIIEDPY@YGNDSDFE<br>0.0208 K.QLIIEDPY@YGNDSDFEVVYQQC*LR.C<br>0.0086 K.QLIIEDPY@YGNDSDFEVVYQQC*LR.C                                                                                                                                                                                                             |
| 14 kDa phosphohistidine phosphatase -- Phosphohistidine phosphatase 1                               | Q9DAK9 | R.KIHVYGY@SM#GYGR.A                                                                                                                                                                                                                                                                                                                         | Y92                                                         | 1628.10                                                                                         | 1.35                                                                 | 0.1921 R.KIHVY@GYSM#GYGR.A                                                                                                                                                                                                                                                                                                                                               |
| Protein phosphatase 1 regulatory subunit 12A                                                        | Q9DBR7 | R.TYDETY@TR.Y<br>Y.SRTYDETY@TRY.R                                                                                                                                                                                                                                                                                                           | Y764<br>Y764                                                | 1129.04<br>1536.20                                                                              | 0.58<br>1.55                                                         | 0.0450 R.TYDETY@TR.Y<br>0.0398 Y.SRTYDETY@TRY.R                                                                                                                                                                                                                                                                                                                          |
| Protein phosphatase 2 regulatory subunit B56 delta isoform                                          | Q99PC9 | R.KSELQDQVY@T*IK.A                                                                                                                                                                                                                                                                                                                          | Y572                                                        | 1484.24                                                                                         | 1.47                                                                 | none                                                                                                                                                                                                                                                                                                                                                                     |
| Serine/threonine protein phosphatase 2A, catalytic subunit, alpha isoform -- PP2A alpha (PP2A beta) | P63330 | R.QITQVY@GFYDEC*LR.K<br>R.C*GNQAAIMELDDTLKY@SFLQFDPAPR.R                                                                                                                                                                                                                                                                                    | Y127<br>Y284                                                | 1872.93<br>3081.11                                                                              | 1.11<br>0.71                                                         | none<br>0.0390 R.C*GNQAAIMELDDTLKY@SFLQFDPAPR.R                                                                                                                                                                                                                                                                                                                          |
| Tyrosine-protein phosphatase, non-receptor type 11 -- SHP-2                                         | P35235 | H.IKIQNTGDY@YDLY.G<br>K.IQNTGDY@YDLYGGEK.F                                                                                                                                                                                                                                                                                                  | Y62<br>Y62                                                  | 1686.36<br>1815.88                                                                              | 0.58<br>0.10                                                         | 0.0791 H.IKIQNT@GDYDLY.G<br>0.0776 K.IQNTGDY@YDLYGGEK.F                                                                                                                                                                                                                                                                                                                  |
| Tyrosine-protein phosphatase, non-receptor type 14                                                  | Q62130 | R.NLNIINTHAYNQPEELVY@SQPEMR.E                                                                                                                                                                                                                                                                                                               | Y485                                                        | 2954.15                                                                                         | 0.76                                                                 | 0.0789 R.NLNIINTHAYNQPEELVY@SQPEMR.E                                                                                                                                                                                                                                                                                                                                     |
| <b>SIGNALING: SMALL G PROTEINS AND REGULATORS</b>                                                   |        |                                                                                                                                                                                                                                                                                                                                             |                                                             |                                                                                                 |                                                                      |                                                                                                                                                                                                                                                                                                                                                                          |
| ARF GTPase-activating protein GIT1                                                                  | Q68FF6 | F.HSTELEDDAIY@SVHVPAGLYR<br>R.LQPFHS@TELEDDAIY@SVHVPAGLYR.I<br>R.LQPFHST@ELEDDAIY@SVHVPAGLYR.I<br>R.LQPFHST@ELEDDAIY@SVHVPAGLYR@R.I<br>R.LQPFHST@ELEDDAIY@SVHVPAGLYR.I<br>R.LQPFHST@ELEDDAIY@SVHVPAGLYR.I                                                                                                                                   | Y554<br>Y554<br>Y554<br>Y554,Y563<br>Y554<br>Y554           | 2296.34<br>3018.84<br>3018.69<br>3018.72<br>2939.39<br>2920.86                                  | 0.29<br>1.42<br>1.27<br>1.30<br>1.97<br>1.44                         | 0.1029 F.HSTELEDDAIY@SVHVPAGLYR<br>0.0484 R.LQPFHST@ELEDDAIY@SVHVPAGLYR.I<br>0.0263 R.LQPFHST@ELEDDAIY@SVHVPAGLYR.I<br>0.1026 R.LQPFHST@ELEDDAIY@SVHVPAGLYR@R.I<br>0.0863 R.LQPFHST@ELEDDAIY@SVHVPAGLYR.I<br>0.0425 R.LQPFHST@ELEDDAIY@SVHVPAGLYR.I                                                                                                                      |
| Engulfment and cell motility protein 2 -- ELMO2                                                     | Q8BHL5 | K.EVC*DGWSLPNPEY@YTLR.Y                                                                                                                                                                                                                                                                                                                     | Y48                                                         | 2179.80                                                                                         | 0.87                                                                 | 0.1206 K.EVC*DGWSLPNPEY@YTLR.Y                                                                                                                                                                                                                                                                                                                                           |
| Glucocorticoid receptor DNA binding factor 1 [fragment] -- p190RhoGAP                               | Q91YM2 | R.NEEENIY@SVPHDSTQGK.I                                                                                                                                                                                                                                                                                                                      | Y943                                                        | 2027.34<br>2027.18                                                                              | 0.47<br>0.31                                                         | 0.1491 R.NEEENIY@SVPHDSTQGK.I<br>0.0454 R.NEEENIY@SVPHDSTQGK.I                                                                                                                                                                                                                                                                                                           |
| Myosin phosphatase Rho-interacting protein -- MRIP                                                  | P97434 | K.VRVESGY@FSLEK.A<br>K.YASDKYKDIY@TELSIAK.A                                                                                                                                                                                                                                                                                                 | Y268<br>Y944                                                | 1493.84<br>1495.26<br>2090.07                                                                   | 0.10<br>1.52<br>2.04                                                 | 0.0161 K.VRVES@GYFSLEK.A<br>none                                                                                                                                                                                                                                                                                                                                         |
| Rab GDP dissociation inhibitor alpha -- Rab GDI alpha (Rab GDI beta)                                | P50396 | K.VLHMDRNPY@YGGESSITPLEELYK.R<br>K.SPYLYPLY@GLGELPQGFAR.L                                                                                                                                                                                                                                                                                   | Y38<br>Y229                                                 | 2979.22<br>2221.76                                                                              | 0.82<br>0.65                                                         | 0.0689 K.VLHMDRNPY@YGGESSITPLEELYK.R<br>0.0852 K.SPYLY@PLYGLGELPQGFAR.L                                                                                                                                                                                                                                                                                                  |
| Rab GDP dissociation inhibitor beta -- Rab GDI beta                                                 | Q61598 | K.KVLHMDQNPY@YGGESASITPLEDYK.R<br>K.KVLHMDQNPY@YGGESASITPLEDYK.F<br>K.VLHM#DQNPY@YGGESASITPLEDYK.R<br>K.VLHM#DQNPY@YGGESASITPLEDYK.R<br>K.VLHM#DQNPY@YGGESASITPLEDYK.R<br>L.HMDQNPY@YGGESASITPLEDYK<br>K.KVLHMDQNPY@YGGESASITPLEDYK.R<br>K.VLHM#DQNPY@YGGESASITPLEDYK.F<br>K.VLHM#DQNPY@YGGESASITPLEDYK.R<br>K.VLHM#DQNPY@YGGESASITPLEDYK.R | Y38<br>Y38<br>Y38<br>Y38<br>Y38<br>Y38<br>Y39<br>Y39<br>Y39 | 3049.21<br>3204.96<br>3094.14<br>2920.90<br>3077.28<br>2581.36<br>3206.67<br>3093.25<br>2921.24 | 0.77<br>0.42<br>1.69<br>0.56<br>0.83<br>1.26<br>2.13<br>0.80<br>0.90 | 0.1151 K.KVLHMDQNPY@YGGESASITPLEDYK.R<br>0.0675 K.KVLHMDQNPY@YGGESASITPLEDYK.F<br>0.0109 K.VLHM#DQNPY@YGGESASITPLEDYK.R<br>0.0025 K.VLHM#DQNPY@YGGESASITPLEDYK.R<br>0.0702 K.VLHM#DQNPY@YGGESASITPLEDYK.F<br>0.0309 L.HMDQNPY@YGGESASITPLEDYK<br>0.0014 K.KVLHMDQNPY@YGGESASITPLEDYK.R<br>0.0075 K.VLHM#DQNPY@YGGESASITPLEDYK.F<br>0.0066 K.VLHM#DQNPY@YGGESASITPLEDYK.R |

|                                                                |        |                                                                                                                                                                                                                                                                                                                                                                                                                                              |                                                                                                         |                                                                                                                                             |                                                                                                        |                                                                                                                                                                                                                                                                                                                                                                                                                                     |
|----------------------------------------------------------------|--------|----------------------------------------------------------------------------------------------------------------------------------------------------------------------------------------------------------------------------------------------------------------------------------------------------------------------------------------------------------------------------------------------------------------------------------------------|---------------------------------------------------------------------------------------------------------|---------------------------------------------------------------------------------------------------------------------------------------------|--------------------------------------------------------------------------------------------------------|-------------------------------------------------------------------------------------------------------------------------------------------------------------------------------------------------------------------------------------------------------------------------------------------------------------------------------------------------------------------------------------------------------------------------------------|
| Ras GTPase-activating-like protein -- IQGAP1                   | Q9JKF1 | L.RSPDVGLY@GVIPEC*GETY.Q<br>L.SALRSPDVGLY@GVIPEC*GETY.Q<br>L.VKLQQTY@SAL.N                                                                                                                                                                                                                                                                                                                                                                   | Y654<br>Y654<br>Y1510                                                                                   | 2092.39<br>2363.51<br>1230.96                                                                                                               | 0.47<br>0.44<br>0.31                                                                                   | none<br>none<br>0.1154 L.VKLQQT@YSAL.N                                                                                                                                                                                                                                                                                                                                                                                              |
| Ras and Rab interactor 1                                       | Q921Q7 | K.EKPSTDPLY@DTPDTR.G                                                                                                                                                                                                                                                                                                                                                                                                                         | Y35                                                                                                     | 1815.44<br>1815.30                                                                                                                          | 0.62<br>0.48                                                                                           | 0.1892 K.EKPST@DPLYDTPDTR.G<br>0.0035 K.EKPST@DPLYDTPDTR.G                                                                                                                                                                                                                                                                                                                                                                          |
| Rho-GTPase-activating protein 12                               | Q8C0D4 | R.AT@TPPNQGRPDS@PVY@ANLQELK.I<br>R.ATT@PPNQGRPDS@PVY@ANLQELK.I                                                                                                                                                                                                                                                                                                                                                                               | Y241<br>Y241                                                                                            | 2636.11<br>2637.43                                                                                                                          | -0.11<br>1.21                                                                                          | 0.0159 R.ATT@PPNQGRPDS@PVY@ANLQELK.I<br>0.0075 R.AT@TPPNQGRPDS@PVY@ANLQELK.I                                                                                                                                                                                                                                                                                                                                                        |
| Rho/rac guanine nucleotide exchange factor (GEF) 2 -- ARHGEF2  | Q923E0 | R.RRS@LPAGDALY@LSFNPPQPSR.G<br>R.SLPAGDALY@LSFNPPQPSR.G                                                                                                                                                                                                                                                                                                                                                                                      | Y893<br>Y893                                                                                            | 2504.02<br>2110.51                                                                                                                          | 1.78<br>0.48                                                                                           | none<br>0.1470 R.SLPAGDALYLS@FNPPQPSR.G                                                                                                                                                                                                                                                                                                                                                                                             |
| TBC1 domain family member 15                                   | Q9CXF4 | K.SLSQSFENLLDEPAY@GLIQK.I                                                                                                                                                                                                                                                                                                                                                                                                                    | Y215                                                                                                    | 2332.54                                                                                                                                     | 0.40                                                                                                   | none                                                                                                                                                                                                                                                                                                                                                                                                                                |
| <b>SIGNALING: OTHER</b>                                        |        |                                                                                                                                                                                                                                                                                                                                                                                                                                              |                                                                                                         |                                                                                                                                             |                                                                                                        |                                                                                                                                                                                                                                                                                                                                                                                                                                     |
| 53BP2: Apoptosis stimulating of p53 protein 2 [fragment]       | Q8CG79 | R.KPQTVAAISSY@SMYTQQQAPGK.N                                                                                                                                                                                                                                                                                                                                                                                                                  | Y569                                                                                                    | 2465.08                                                                                                                                     | 0.88                                                                                                   | 0.0767 R.KPQTVAAAS@SIYSMYTQQQAPGK.N                                                                                                                                                                                                                                                                                                                                                                                                 |
| Ankyrin repeat and SAM domain containing protein 1 -- ANKS1    | P59672 | L.ILHFDTHADEEGPY@EALY.N<br>L.AVRPRIQSSAPQEEEEHPY@ELL.L<br>L.AVRPRIQSSAPQEEEEHPY@ELL.L<br>R.IQSSAPQEEEEHPY@ELLLTAETK.K<br>R.IQSSAPQEEEEHPY@ELLLTAETK.L                                                                                                                                                                                                                                                                                        | Y377<br>Y471<br>Y471<br>Y471<br>Y471                                                                    | 2201.56<br>2546.21<br>2659.39<br>2724.54<br>2851.79                                                                                         | 1.61<br>1.00<br>1.10<br>2.26<br>1.41                                                                   | 0.1259 L.ILHFDTHADEEGPYEALY@.N<br>none<br>none<br>0.0675 R.IQSSAPQEEEEHPYELLT@AETK.K<br>0.1325 R.IQSSAPQEEEEHPYELLT@AETK.L                                                                                                                                                                                                                                                                                                          |
| Annexin A1                                                     | P10107 | R.ALY@EAGER.R<br>R.ALY@EAGERR.K                                                                                                                                                                                                                                                                                                                                                                                                              | Y206<br>Y206                                                                                            | 989.01<br>1144.76                                                                                                                           | 0.56<br>0.21                                                                                           | none<br>none                                                                                                                                                                                                                                                                                                                                                                                                                        |
| Annexin A2                                                     | P07356 | C.KLSLEGDHSTPPSAY@GSVKPY.T<br>K.LSLEGDHSTPPSAY@GSVKPYTNFDAER.D<br>L.SLEGDHSTPPSAY@GSVKPY.T<br><br>K.SYSPY@DMLESIK.K<br>K.SYSPY@DMLESIKK.E<br>F.ADRLY@DSM.K<br>L.YFADRLY@DSM#.K<br>L.YFADRLY@DSM.K<br>Y.FADRLY@DSM.K<br>K.SLY@YIQQDTK.G<br>K.SLY@YIQQDTK.G<br>K.SLY@Y@YIQQDTK.G                                                                                                                                                               | Y23<br>Y23<br>Y23<br><br>Y237<br>Y237<br>Y274<br>Y274<br>Y274<br>Y274<br>Y315<br>Y316<br>Y315,Y316      | 2315.40<br>3019.97<br>2072.75<br>2072.63<br>1512.22<br>1641.52<br>1050.94<br>1377.36<br>1360.37<br>1197.54<br>1502.65<br>1502.70<br>1582.68 | 2.29<br>1.58<br>0.82<br>0.70<br>-0.45<br>0.76<br>0.51<br>0.80<br>-0.19<br>0.04<br>0.96<br>1.01<br>0.99 | 0.0081 C.KLSLEGDHSTPPS@AYGSVKPY.T<br>0.1079 K.LSLEGDHSTPPS@AYGSVKPYTNFDAER.D<br>none<br>0.0719 L.SLEGDHSTPPS@AYGSVKPY.T<br>none<br>none<br>none<br>none<br>none<br>0.1004 K.S@YIQQDTK.G<br>0.0625 K.SLY@YIQQDTK.G<br>0.1193 K.S@LY@YIQQDTK.G                                                                                                                                                                                        |
| Annexin A5                                                     | P48036 | R.SIPAYLAETLY@YAMK.G<br>K.NFATSLY@SMIK.G                                                                                                                                                                                                                                                                                                                                                                                                     | Y254<br>Y295                                                                                            | 1814.41<br>1354.94                                                                                                                          | 0.53<br>0.30                                                                                           | 0.1242 R.SIPAYLAET@LYYAMK.G<br>0.0812 K.NFATSLYS@MIK.G                                                                                                                                                                                                                                                                                                                                                                              |
| Annexin A6                                                     | P14824 | R.GSVHDFPEFDANQDAEALY@TAM#.K<br>R.GSVHDFPEFDANQDAEALY@TAMK.G<br><br>Y.RGSVHDFPEFDANQDAEALY@TAM#.K<br>Y.RGSVHDFPEFDANQDAEALY@TAM.K                                                                                                                                                                                                                                                                                                            | Y29<br>Y29<br><br>Y29<br>Y29                                                                            | 2653.34<br>2638.45<br>2636.43<br>2681.46<br>2664.53<br>2665.58                                                                              | 1.21<br>2.32<br>0.30<br>1.32<br>0.39<br>1.44                                                           | 0.0530 R.GSVHDFPEFDANQDAEALY@AM#.K.G<br>0.0949 R.GSVHDFPEFDANQDAEALY@AMK.G<br>0.0199 R.GSVHDFPEFDANQDAEALY@AMK.G<br>0.0616 Y.RGSVHDFPEFDANQDAEALY@AM#.K<br>0.0017 Y.RGSVHDFPEFDANQDAEALY@AM.K<br>0.0634 Y.RGSVHDFPEFDANQDAEALY@AM.K                                                                                                                                                                                                 |
| Annexin A11                                                    | P97384 | K.TPVLFDVY@EIKEAIK.G                                                                                                                                                                                                                                                                                                                                                                                                                         | Y277                                                                                                    | 1846.58<br>1846.26                                                                                                                          | 1.60<br>1.28                                                                                           | none<br>none                                                                                                                                                                                                                                                                                                                                                                                                                        |
| Cell division cycle and apoptosis regulator protein 1 -- CARP1 | Q8CH18 | R.VLVEATY@NPNMPFK.W<br>R.VLVEATY@NPNMPFKWNAQR.I                                                                                                                                                                                                                                                                                                                                                                                              | Y189<br>Y189                                                                                            | 1703.62<br>2359.02                                                                                                                          | 0.80<br>0.88                                                                                           | 0.1452 R.VLVEAT@YNPMPFK.W<br>0.0875 R.VLVEAT@YNPMPFKWNAQR.I                                                                                                                                                                                                                                                                                                                                                                         |
| Caveolin-1                                                     | P49817 | K.YVDSEGHLY@TVPIR.E                                                                                                                                                                                                                                                                                                                                                                                                                          | Y14                                                                                                     | 1729.23                                                                                                                                     | 0.40                                                                                                   | 0.0850 K.YVDSEGHLYT@VPIR.E                                                                                                                                                                                                                                                                                                                                                                                                          |
| Proto-oncogene c-Crk                                           | Q64010 | Q.KRVPNAY@DKTALA                                                                                                                                                                                                                                                                                                                                                                                                                             | Y251                                                                                                    | 1456.89                                                                                                                                     | 1.12                                                                                                   | 0.1533 Q.KRVPNAYDKT@ALA                                                                                                                                                                                                                                                                                                                                                                                                             |
| Cyclin-dependent kinases regulatory subunit 2                  | P56390 | Y.SDKYFDEHY@EY.R<br>Y.SDKYFDEHY@EY.R                                                                                                                                                                                                                                                                                                                                                                                                         | Y17<br>Y17                                                                                              | 1575.53<br>1739.37                                                                                                                          | -0.07<br>0.71                                                                                          | none<br>none                                                                                                                                                                                                                                                                                                                                                                                                                        |
| Docking protein 1 -- Dok1                                      | P97465 | K.TVPPVPQDPLGSPALY@AEPLDSL.R<br>R.IPPGPSQDSVY@SDPLGSTPAGAGEGVHSK.K<br>K.KPLY@WDLY@GHVQQQLLK.T<br>K.KPLYWDLY@GHVQQQLLK.T<br>K.LTDSKEDIY@DEPEGLAPAPPR.G<br><br>K.TKLTDSKEDIY@DEPEGLAPAPPR.G<br>K.TKLTDS*KEDIY@DEPEGLAPAPPRGLYDLPQEP<br>R.D<br>L.KTKLTDSKEDIY@DEPEGLAPAPPRGLY.D<br>L.LKTKLTDSKEDIY@DEPEGLAPAPPRGLY.D<br>K.LTDSKEDIY@DEPEGLAPAPPRGLY@DLPQEP.R<br>D<br>K.LTDS*KEDIYDEPEGLAPAPPRGLY@DLPQEP.R<br>D<br>R.LKEEGY@ELPY@NPATDDYAVPPPR.S | Y295<br>Y314<br>Y336,Y340<br>Y340<br>Y361<br><br>Y361<br>Y361<br>Y361<br>Y361,Y376<br>Y376<br>Y397,Y401 | 2807.66<br>2888.60<br>2290.89<br>2211.58<br>2491.80<br>2490.92<br>2721.28<br>3872.22<br>3181.82<br>3295.91<br>3740.92<br>3642.13<br>2795.76 | 1.22<br>1.25<br>1.74<br>2.43<br>1.62<br>0.74<br>1.96<br>2.31<br>1.24<br>2.24<br>2.15<br>1.37<br>1.49   | 0.1222 K.TVPPVPQDPLGSPALYAEPLDS@LR.I<br>0.0146 R.IPPGPSQDSVYS@DPLGSTPAGAGEGVHSK.K<br>none<br>0.1680 K.KPLY@WDLYGHVQQQLLK.T<br>0.0650 K.LTDS@KEDIYDEPEGLAPAPPR.G<br>none<br>none<br>0.0003 K.TKLTDS*KEDIYDEPEGLAPAPPRGLY@DLPQEP.R.D<br>0.0228 L.KTKLTDS@KEDIYDEPEGLAPAPPRGLY.D<br>0.0358 L.LKTKLTDS@KEDIYDEPEGLAPAPPRGLY.D<br>0.1147 K.LT@DSKEDIYDEPEGLAPAPPRGLY@DLPQEP.R.D<br>0.0005 K.LT*DSKEDIYDEPEGLAPAPPRGLY@DLPQEP.R.D<br>none |



|                                                                              |        |                                                                                                                                                                                                                                                         |                                                                             |                                                                                      |                                                              |                                                                                                                                                                                                                                                                                                                  |
|------------------------------------------------------------------------------|--------|---------------------------------------------------------------------------------------------------------------------------------------------------------------------------------------------------------------------------------------------------------|-----------------------------------------------------------------------------|--------------------------------------------------------------------------------------|--------------------------------------------------------------|------------------------------------------------------------------------------------------------------------------------------------------------------------------------------------------------------------------------------------------------------------------------------------------------------------------|
|                                                                              |        | R.LKEEGYELPY@NPATDDYAVPPPR.S<br>R.LKEEGYELPY@NPATDDYAVPPPR.S<br>R.LKEEGYELPYNPATDDY@AVPPPR.S<br>R.LKEEGY@ELPYNPATDDY@AVPPPR.S<br>R.LKEEGYELPY@NPATDDY@AVPPPR.S<br>R.LKEEGYELPY@NPATDDY@AVPPPR.S@PK.P<br>F.SSDTALY@SQVQKSGTSGAW.D<br>K.GFSSDTALY@SQVQK.S | Y401<br>Y401<br>Y408<br>Y397,Y408<br>Y401,Y408<br>Y401,Y408<br>Y450<br>Y450 | 2796.49<br>2715.12<br>2715.12<br>2795.73<br>2795.23<br>3187.64<br>2054.11<br>1611.59 | 1.57<br>0.85<br>0.85<br>1.46<br>0.96<br>1.19<br>1.19<br>0.85 | 0.0063 R.LKEEGYELPY@NPATDDY@AVPPPR.S<br>0.1652 R.LKEEGYELPYNPAT@DDYAVPPPR.S<br>0.0058 R.LKEEGYELPYNPAT@DDYAVPPPR.S<br>0.0636 R.LKEEGYELPY@NPATDDY@AVPPPR.S<br>0.1159 R.LKEEGY@ELPYNPATDDY@AVPPPR.S<br>0.0628 R.LKEEGY@ELPYNPATDDY@AVPPPR.S@PK.P<br>0.0846 F.SSDTALY@SQVQKSGTSGAW.D<br>0.1118 K.GFSSDTALY@SQVQK.S |
| Epidermal growth factor receptor kinase substrate 8 -- EPS8                  | Q08509 | R.LSTEHSNVSDY@PPADGYAYSSSMYHR.G                                                                                                                                                                                                                         | Y484                                                                        | 3015.46                                                                              | 1.20                                                         | 0.1683 R.LSTEHSNVSDY@PPADGYAYSSSMYHR.G                                                                                                                                                                                                                                                                           |
| Hepatocyte growth factor-regulated tyrosine kinase substrate -- HGS/ Hrs     | Q99LI8 | R.VC*EPC*Y@EQLNK.K                                                                                                                                                                                                                                      | Y216                                                                        | 1519.93                                                                              | 0.34                                                         | none                                                                                                                                                                                                                                                                                                             |
| Insulin receptor substrate 1 -- IRS-1                                        | P35569 | R.AASEAGGPALLEY@YENEK.K                                                                                                                                                                                                                                 | Y46                                                                         | 2163.48                                                                              | 0.47                                                         | 0.1355 R.AASEAGGPALLEY@YENEK.K                                                                                                                                                                                                                                                                                   |
| Insulin receptor substrate 2 -- IRS-2                                        | P81122 | K.VAYNPYPEDY@GDIEIGSHK.S                                                                                                                                                                                                                                | Y628                                                                        | 2247.94                                                                              | 0.94                                                         | none                                                                                                                                                                                                                                                                                                             |
| Kin of IRRE-like protein 1 precursor -- KIRREL                               | Q80W68 | R.C*DTIDTREEEY@EMKDPTNGY@YNVR.A<br>R.C*DTIDT@REEYEMKDPTNGY@YNVR.A<br>R.EEYEMKDPTNGY@YNVR.A<br>Y.RLGYPOAPPSGLERTPY@EAY@DPIGKY.A                                                                                                                          | Y628,Y637<br>Y637<br>Y637<br>Y753,Y756                                      | 3030.00<br>3029.81<br>2089.23<br>3099.26                                             | 0.78<br>0.59<br>1.35<br>0.79                                 | 0.0581 R.C*DTIDT@REEYEMKDPTNGY@YNVR.A<br>0.0176 R.C*DTIDTREEEY@EMKDPTNGY@YNVR.A<br>0.0316 R.EEYEMKDPTNGY@YNVR.A<br>0.1675 Y.RLGYPOAPPSGLERTPY@EAY@DPIGKY.A                                                                                                                                                       |
| Latrophilin-2                                                                | Q8JZZ7 | R.SENEDIY@YK.S<br>R.GNSDGY@IIPINK.E                                                                                                                                                                                                                     | Y838<br>Y865                                                                | 1241.21<br>1370.74                                                                   | 0.70<br>0.07                                                 | 0.1688 R.SENEDIY@YK.S<br>0.0837 R.GNSDGY@IIPINK.E                                                                                                                                                                                                                                                                |
| Non-catalytic region of tyrosine kinase adaptor protein 1 -- NCK1            | Q99M51 | K.PSVPDTASPADDSFVDPGERLY@DLNMPAFVK.F<br>K.RKPS@VPDTASPADDSFVDPGERLY@DLNMPAFVK.F<br>K.RKPSVPDTASPADDSFVDPGERLY@DLNMPAFVK.F<br>R.KPSVPDTASPADDSFVDPGERLY@DLNMPAFVK.F                                                                                      | Y105<br>Y105<br>Y105<br>Y105                                                | 3432.55<br>3796.48<br>3716.18<br>3560.94                                             | 1.96<br>1.70<br>1.40<br>2.26                                 | none<br>0.0168 K.RKPSVPDT@ASPADDSFVDPGERLY@DLNMPAFVK.F<br>0.1164 K.RKPSVPDTASPADDS@FVDPGERLY@DLNMPAFVK.F<br>none                                                                                                                                                                                                 |
| Notchless homolog 1                                                          | Q8VEJ4 | K.LATDLPGHADEVY@AVDWSPDQQR.V                                                                                                                                                                                                                            | Y459                                                                        | 2593.81                                                                              | 1.63                                                         | none                                                                                                                                                                                                                                                                                                             |
| Phosphatidylinositol 3-kinase regulatory alpha subunit -- p85 alpha          | P26450 | K.SREYDRLY@EEYTR.T<br>K.LNEWLGNENTEDQY@SLVEDDEDLPHHDEK.T                                                                                                                                                                                                | Y467<br>Y607                                                                | 1861.24<br>3565.40                                                                   | 1.41<br>1.89                                                 | 0.1544 K.SREYDRLY@EEYTR.T<br>0.0421 K.LNEWLGNENTEDQY@SLVEDDEDLPHHDEK.T                                                                                                                                                                                                                                           |
| Phosphatidylinositol 3-kinase, regulatory subunit, polypeptide 2 -- p85 beta | O08908 | R.EYDQLY@EEYTR.T                                                                                                                                                                                                                                        | Y458                                                                        | 1590.44                                                                              | 1.79                                                         | 0.1065 R.EYDQLY@EEYTR.T                                                                                                                                                                                                                                                                                          |
| Phospholipase C, gamma 1                                                     | Q6P1G1 | K.IGTAEPDY@GALY@EGRNPGFYVEANPMPTFK.C<br>K.IGTAEPDY@GALY@EGRNPGFY@VEANPMPTFK.C<br>K.IGTAEPDY@GALY@EGRNPGFYVEANPMPTFK.C                                                                                                                                   | Y771,Y775<br>Y775,Y783<br>Y775                                              | 3465.23<br>3465.49<br>3385.80                                                        | 0.67<br>0.93<br>1.24                                         | 0.1939 K.IGT@AEPDY@GALY@EGRNPGFYVEANPMPTFK.C<br>none<br>0.0283 K.IGTAEPDY@GALY@EGRNPGFYVEANPMPTFK.C                                                                                                                                                                                                              |
| Protein Wnt-2b precursor                                                     | O70283 | K.GTDGG*EIMCCGRGY@DTTR.V                                                                                                                                                                                                                                | Y342                                                                        | 2074.12                                                                              | -0.64                                                        | none                                                                                                                                                                                                                                                                                                             |
| Guanine nucleotide-binding protein beta subunit 2-like 1 -- RACK1            | P68040 | K.HLY@TLDGGDIINALC*FSPNR.Y<br>L.WDLNEGKHY@TLDGGDIINALC<br>W.DLNEGKHY@TLDGGDIINALC<br>W.DLNEGKHY@TLDGGDIINALC*F.S                                                                                                                                        | Y227<br>Y227<br>Y227<br>Y227                                                | 2357.31<br>2356.97<br>2438.42<br>2252.20<br>2559.76                                  | 1.22<br>0.88<br>1.24<br>1.10<br>1.58                         | 0.0189 K.HLYT@LDGGDIINALC*FSPNR.Y<br>0.0595 K.HLYT@LDGGDIINALC*FSPNR.Y<br>0.0921 L.WDLNEGKHY@TLDGGDIINALC<br>0.0263 W.DLNEGKHY@TLDGGDIINALC<br>0.0307 W.DLNEGKHY@TLDGGDIINALC*F.S                                                                                                                                |
| Retinoic acid-induced protein 3                                              | Q8BHL4 | F.SIPRAQAPASPY@NDY@EGRKGDS.-<br>F.SIPRAQAPASPY@NDY@EGRKGDS^.-                                                                                                                                                                                           | Y346,Y349<br>Y346                                                           | 2539.79<br>2442.48                                                                   | 0.66<br>1.35                                                 | 0.0655 F.SIPRAQAPASPY@NDY@EGRKGDS.-<br>0.1095 F.SIPRAQAPASPY@NDY@EGRKGDS^.-                                                                                                                                                                                                                                      |
| SH2 domain-containing adapter protein B -- SHB                               | Q6PD21 | R.DFEDPY@NGPSSLR.K                                                                                                                                                                                                                                      | Y95                                                                         | 1635.59                                                                              | 1.90                                                         | none                                                                                                                                                                                                                                                                                                             |
| SHC transforming protein 1 -- SHC1                                           | P98083 | R.ELFDDPSY@VNIQNLDK.A<br>R.MAGFDGSAWDEEEEEPPDHQY@Y@NDFPGKEP<br>PLGGVDMR#R.L<br>R.MAGFDGSAWDEEEEEPPDHQY@Y@NDFPGKEP<br>PLGGVDMR.L<br>F.DGSAWDEEEEEPPDHQY@Y@NDFPGKEPPLGG<br>VVD.M.R                                                                        | Y423<br>Y349,Y350<br>Y349,Y350<br>Y349,Y350                                 | 1991.42<br>4589.22<br>4569.94<br>4009.78                                             | 1.50<br>2.33<br>-0.95<br>1.16                                | 0.0433 R.ELFDDPSY@VNIQNLDK.A<br>none<br>none<br>none                                                                                                                                                                                                                                                             |
| SHC SH2 domain-binding protein 1                                             | Q9Z179 | R.SWDEEEDEY@DYFVR.C                                                                                                                                                                                                                                     | Y217                                                                        | 2091.18                                                                              | 0.39                                                         | 0.1524 R.SWDEEEDEY@DYFVR.C                                                                                                                                                                                                                                                                                       |
| SH2-containing inositol 5-phosphatase 2 -- SHIP2                             | Q9JLL7 | R.FSEEEISFPPTY@RYER.G<br>K.NSFNNPAY@YVLEGVPHQLLPLEPPSLAR.A                                                                                                                                                                                              | Y662<br>Y987                                                                | 2131.40<br>3217.18                                                                   | 1.44<br>1.55                                                 | 0.0177 R.FSEEEISFPPTY@RYER.G<br>0.0566 K.NSFNNPAY@YVLEGVPHQLLPLEPPSLAR.A                                                                                                                                                                                                                                         |
| Sorbin and SH3 domain-containing protein 1 -- SORBS1                         | Q62417 | K.TPVDYIDLPI@SSSPSR.S                                                                                                                                                                                                                                   | Y1198                                                                       | 1877.89                                                                              | 1.02                                                         | 0.0418 K.TPVDYIDLPI@SSSPSR.S                                                                                                                                                                                                                                                                                     |
| Signal transducing adapter molecule 2 -- STAM-2                              | O88811 | K.LVNEAPVY@SVYS@K.L<br>K.LVNEAPVY@SVYS@K.L<br>Y.NKLVNEAPVY@SVYS                                                                                                                                                                                         | Y371<br>Y371<br>Y371                                                        | 1629.25<br>1548.90<br>1575.69                                                        | 0.48<br>0.13<br>-0.09                                        | 0.0074 K.LVNEAPVY@SVYS@K.L<br>0.0201 K.LVNEAPVY@SVYS@K.L<br>0.1266 Y.NKLVNEAPVY@SVYS                                                                                                                                                                                                                             |
| Signal transducer and activator of transcription 3 - STAT3                   | P42227 | R.QFLAPWIESQDWAY@AASK.E<br>K.YC*RPESQEHPEADPGSAAPY@LK.T                                                                                                                                                                                                 | Y45<br>Y705                                                                 | 2191.74<br>2581.97                                                                   | 0.72<br>-0.14                                                | none<br>none                                                                                                                                                                                                                                                                                                     |

|                                                                                                                                         |        |                                                                                                                                                                                                                                                                                                                     |                                                                                                               |                                                                                                                                                                              |                                                                                                                               |                                                                                                                                                                                                                          |
|-----------------------------------------------------------------------------------------------------------------------------------------|--------|---------------------------------------------------------------------------------------------------------------------------------------------------------------------------------------------------------------------------------------------------------------------------------------------------------------------|---------------------------------------------------------------------------------------------------------------|------------------------------------------------------------------------------------------------------------------------------------------------------------------------------|-------------------------------------------------------------------------------------------------------------------------------|--------------------------------------------------------------------------------------------------------------------------------------------------------------------------------------------------------------------------|
| STRAP: serine/threonine kinase receptor associated protein                                                                              | Q8BP89 | K.IGFPEATAEELIEIASENSDSIY@SSTPEVK.A<br>K.IGFPEATAEELIEIASENSDSIY@SSTPEVKA.-                                                                                                                                                                                                                                         | Y342<br>Y342                                                                                                  | 3382.35<br>3453.36                                                                                                                                                           | 1.82<br>1.81                                                                                                                  | 0.0660 K.IGFPEATAEELIEIASENS@DSIYSSSTPEVK.A<br>0.0893 K.IGFPEATAEELIEIASENS@DSIYSSSTPEVKA.-                                                                                                                              |
| Striatin                                                                                                                                | O55106 | K.STSLDVEPIY@TFR.A<br>W.NLQKTAPAKKSTSLDVEPIY@TFR                                                                                                                                                                                                                                                                    | Y510<br>Y510                                                                                                  | 1608.98<br>2532.43                                                                                                                                                           | 1.21<br>1.12                                                                                                                  | 0.0636 K.STSLDVEPIY@TFR.A<br>none                                                                                                                                                                                        |
| Striatin-3                                                                                                                              | Q9ERG2 | K.SASLDVEPIY@TFR.A                                                                                                                                                                                                                                                                                                  | Y526                                                                                                          | 1577.81                                                                                                                                                                      | 0.05                                                                                                                          | 0.1014 K.SASLDVEPIY@TFR.A                                                                                                                                                                                                |
| hypothetical SH3/Phox-like/Src homology 3 (SH3) domain profile/Proline-rich region profile/PX domain profile containing protein -- TKS4 | Q3TB89 | R.VTWSSGATEAIY@R.R<br>K.TEPAQSEDHVDIY@NLR.S                                                                                                                                                                                                                                                                         | Y42<br>Y661                                                                                                   | 1521.35<br>1966.82                                                                                                                                                           | 0.64<br>-0.07                                                                                                                 | none<br>none                                                                                                                                                                                                             |
| <b>ADHESION: CELL/ECM</b>                                                                                                               |        |                                                                                                                                                                                                                                                                                                                     |                                                                                                               |                                                                                                                                                                              |                                                                                                                               |                                                                                                                                                                                                                          |
| Bystin                                                                                                                                  | O54825 | R.GREVEEEY@VGPR.L                                                                                                                                                                                                                                                                                                   | Y48                                                                                                           | 1758.55                                                                                                                                                                      | 0.78                                                                                                                          | none                                                                                                                                                                                                                     |
| CRK-associated substrate -- p130cas                                                                                                     | Q61140 | -.MTVPNVLAKALY@DNVAESPDELSFR.K<br>K.ALY@DNVAESPDELSFR.K<br>Y.VYEAQAQTEQDEY@DTPRHLL<br>R.HLLAPGQDIY@DVPPVR.G<br><br>R.GLLPNQYQVEY@DTPPMAVK.G<br><br>K.GPNGRDPLLDVY@DVPPSVSK.D<br>K.GLLSSSHSVY@DVPPSVSK.D<br>R.RPGPGTLY@DVPR.E<br>R.VLPPEVADGSVDDGVY@AVPPAER.E<br>R.ERVLPEVADGSVDDGVY@AVPPAER.E<br>L.SRQLQKMEDVY@QL.V | Y12<br>Y12<br>Y238<br>Y253<br><br>Y271<br><br>Y291<br>Y310<br>Y391<br>Y414<br>Y414<br>Y556                    | 2859.30<br>1906.53<br>2245.17<br>1969.23<br>1968.74<br>2301.22<br>2300.89<br>2249.57<br>2077.88<br>1408.33<br>2629.52<br>2914.26<br>1820.99                                  | -0.10<br>0.67<br>0.19<br>2.22<br>1.73<br>1.12<br>0.79<br>2.47<br>1.86<br>0.62<br>1.23<br>0.82<br>2.11                         | none<br>none<br>0.1373 Y.VYEAQAQTEQDEY@DTPRHLL<br>none<br>0.0092 R.GLLPNQYQVEY@DTPPMAVK.G<br>none<br>0.1877 K.GLLSSSHSVY@DVPPSVSK.D<br>0.0259 R.RPGPGT@LYDVPR.E<br>none<br>0.1930 L.SRQLQKMEDVY@QL.V                     |
| Lipoma-preferred partner homolog -- LPP                                                                                                 | Q8BFW7 | H.YMAGPSSGQIY@GPGPRGY.N<br>Y.MAGPSSGQIY@GPGPRGY.N<br><br>M.AGPSSGQIY@GPGPRGY.N<br>R.YYEPY@YAAGPSYGGR.S<br><br>Y.TSNQGRYEPY@YAAGPSYG<br>R.YYEPY@YAAGPSYGGR.S<br>R.YYEPY@YAAGPSYGGR.S<br><br>K.KMLY@DMENPPADDYFGR.C<br><br>K.MLY@DMENPPADDYFGR.C<br>K.KMLYDMENPPADDY@FGR.C<br><br>K.MLYDMENPPADDY@FGR.C               | Y245<br>Y245<br><br>Y245<br>Y301<br><br>Y301<br>Y301.Y302<br>Y302<br><br>Y403<br><br>Y403<br>Y413<br><br>Y413 | 1938.23<br>1774.53<br>1776.10<br>1644.25<br>1795.86<br>1794.36<br>2168.03<br>1874.90<br>1795.16<br>1795.27<br>2143.53<br>2142.71<br>2014.68<br>2143.01<br>2142.60<br>2015.55 | 0.37<br>-0.27<br>1.30<br>0.49<br>2.11<br>0.61<br>1.12<br>1.15<br>1.41<br>1.52<br>1.63<br>0.81<br>0.87<br>1.11<br>0.70<br>1.74 | none<br>none<br>none<br>none<br>0.0018 R.YYEPY@YAAGPSYGGR.S<br>0.0716 R.YYEPY@YAAGPSYGGR.S<br>none<br>none<br>0.0295 R.YYEPY@YAAGPSYGGR.S<br>0.0274 R.YYEPY@YAAGPSYGGR.S<br>none<br>none<br>none<br>none<br>none<br>none |
| Paxillin                                                                                                                                | Q8VI36 | F.LSEEPY@SYPTGNHTY.Q<br>R.AGEEHVY@SFPNK.Q<br><br>R.AGEEHVY@SFPNKQK.S                                                                                                                                                                                                                                                | Y31<br>Y118<br><br>Y118                                                                                       | 1936.20<br>1588.38<br>1587.41<br>1843.41                                                                                                                                     | 1.38<br>1.69<br>0.71<br>0.57                                                                                                  | 0.1327 F.LSEEPY@SYPTGNHTY.Q<br>0.1758 R.AGEEHVY@SFPNK.Q<br>0.0646 R.AGEEHVY@SFPNK.Q<br>0.1332 R.AGEEHVY@SFPNKQK.S                                                                                                        |
| Syndecan-4 precursor                                                                                                                    | O35988 | Y.KKAPTNEFY@A.-                                                                                                                                                                                                                                                                                                     | Y197                                                                                                          | 1250.02                                                                                                                                                                      | 1.42                                                                                                                          | none                                                                                                                                                                                                                     |
| Talin 1                                                                                                                                 | P26039 | K.TM#QFEPSTMVY@DAC*R.M<br>K.TM#QFEPSTMVY@DAC*R.M<br><br>M.QFEPSTMVY@DAC*RM.I<br>K.ALDY@YMLR.N<br>K.ALDY@YMLR.N<br>K.ALDY@YMLR.N<br>K.LLGEIAQGNENY@AGIAAR.D<br>K.TLAESALQLLY@TAK.E                                                                                                                                   | Y26<br>Y26<br><br>Y26<br>Y70<br>Y70<br>Y71<br>Y1116<br>Y1777                                                  | 1932.47<br>1916.98<br>1916.68<br>1816.12<br>1141.46<br>1125.17<br>1124.25<br>1940.75<br>1602.54                                                                              | 0.71<br>1.23<br>0.92<br>1.41<br>0.94<br>0.65<br>-0.27<br>0.79<br>0.69                                                         | none<br>none<br>none<br>0.1893 M.QFEPST@MVYDAC*RM.I<br>0.0609 K.ALDY@M#LR.N<br>0.1407 K.ALDY@MLR.N<br>0.0243 K.ALDY@YMLR.N<br>none<br>0.1472 K.TLAESALQLLY@TAK.E                                                         |
| Tensin 2                                                                                                                                | Q8CJ95 | R.YGHSGYPALVTY@GYGGAVPSYC*PAYGR.A                                                                                                                                                                                                                                                                                   | Y766                                                                                                          | 2965.54                                                                                                                                                                      | 2.24                                                                                                                          | 0.0122 R.YGHSGYPALVT@GYGGAVPSYC*PAYGR.A                                                                                                                                                                                  |
| Tensin 3                                                                                                                                | Q5SSZ5 | K.LYQAMQPVTSGIY@NVGSENPSR.I<br><br>L.HTQGVPDGSly@AKVR.K<br>R.KPSAPTPVQAY@GQSNY@STQTWVR.Q<br>R.KPSAPTPVQAYGQSNY@STQTWVR.Q                                                                                                                                                                                            | Y216<br><br>Y354<br>Y579.Y584<br>Y584                                                                         | 2655.44<br>2654.76<br>1708.54<br>2727.80<br>2647.86                                                                                                                          | 1.21<br>0.53<br>0.68<br>1.53<br>1.59                                                                                          | 0.1558 K.LYQAMQPVTSGIY@GIYNVGSENPSR.I<br>0.1760 K.LYQAMQPVTSGIY@GIYNVGSENPSR.I<br>none<br>0.1132 R.KPSAPTPVQAY@GQSNY@STQTWVR.Q<br>0.0762 R.KPSAPTPVQAYGQSNY@STQTWVR.Q                                                    |
| Vinculin                                                                                                                                | Q64727 | K.LVQAAQMLQSDPY@SVPAR.D<br><br>K.LVQAAQMLQSDPY@SVPARDYLIDGSR.G<br>L.QSDPY@SVPARDY.L<br>Q.MLQSDPY@SVPARDY.L<br>R.ILLRNPQNQAAY@EHFETMK.N                                                                                                                                                                              | Y99<br><br>Y99<br>Y99<br>Y99<br>Y691                                                                          | 2055.41<br>2054.67<br>2975.19<br>1478.01<br>1721.78<br>2313.73                                                                                                               | 1.40<br>0.66<br>1.74<br>0.38<br>0.02<br>1.61                                                                                  | 0.0072 K.LVQAAQMLQSDPY@SVPAR.D<br>0.1258 K.LVQAAQMLQSDPY@SVPAR.D<br>0.0276 K.LVQAAQMLQSDPY@SVPARDYLIDGSR.G<br>0.0290 L.QSDPY@SVPARDY.L<br>0.0557 Q.MLQSDPY@SVPARDY.L<br>none                                             |
| <b>ADHESION: CELL/CELL</b>                                                                                                              |        |                                                                                                                                                                                                                                                                                                                     |                                                                                                               |                                                                                                                                                                              |                                                                                                                               |                                                                                                                                                                                                                          |



|                                                                        |        |                                                                                                                                                                                                                                                                                                                                                             |                                                                                  |                                                                                                                       |                                                                                      |                                                                                                                                                                                                                                                                                                                                                                                         |
|------------------------------------------------------------------------|--------|-------------------------------------------------------------------------------------------------------------------------------------------------------------------------------------------------------------------------------------------------------------------------------------------------------------------------------------------------------------|----------------------------------------------------------------------------------|-----------------------------------------------------------------------------------------------------------------------|--------------------------------------------------------------------------------------|-----------------------------------------------------------------------------------------------------------------------------------------------------------------------------------------------------------------------------------------------------------------------------------------------------------------------------------------------------------------------------------------|
| Catenin delta-1 -- p120 catenin                                        | P30999 | K.LNGPQDHNHLLY@STIPR.M<br>R.HYEDGYPGSDNY@GSLSR.V<br>R.FHPEPYGLEDDQRSMGY@DDLDY@GMMSDYGTAR.R<br>R.FHPEPYGLEDDQRS@MGYDDLDDY@GMMS@DYGTAR.R<br>R.FHPEPYGLEDDQRS*MGYDDLDDY@GMMS@DYGTAR.R<br>R.FHPEPYGLEDDQRS*MGYDDLDDY@GMMS@DYGTAR.R<br>R.SMGYDDLDDY@GMMSDYGTAR.R<br>R.SMGYDDLDDYGMMS@DYGTAR.R<br>R.SYEDMIGEEVPPDQY@YWAPLAQHER.G<br>R.SYEDMIGEEVPPDQY@WAPLAQHER.G | Y96<br>Y228<br>Y291,Y296<br>Y296<br>Y296<br>Y296<br>Y296<br>Y302<br>Y334<br>Y335 | 2055.83<br>2055.72<br>2054.75<br>3892.72<br>3973.02<br>3874.69<br>3794.55<br>2228.06<br>2229.31<br>3105.19<br>3105.15 | 0.82<br>0.71<br>0.92<br>1.18<br>1.48<br>1.15<br>1.01<br>0.22<br>1.47<br>1.84<br>1.80 | 0.0441 K.LNGPQDHNHLLYS@TIPR.M<br>0.0819 K.LNGPQDHNHLLYS@TIPR.M<br>0.0694 R.HYEDGYPGSDNYGS@LSR.V<br>0.0179 R.FHPEPYGLEDDQRS@MGYDDLDDY@GMMSDYGTAR<br>0.0095 R.FHPEPYGLEDDQRSMGY@DDLDY@GMMS@DYGTAR.R<br>none<br>0.1799 R.FHPEPYGLEDDQRS*MGYDDLDDYGMMS@DYGTAR.R<br>none<br>0.1514 R.SMGYDDLDDYGMMS@DYGTAR.R<br>0.0150 R.SYEDMIGEEVPPDQY@WAPLAQHER.G<br>0.0309 R.SYEDMIGEEVPPDQY@WAPLAQHER.G |
| Plakophilin-4                                                          | Q68FH0 | R.TVHDMQDFGQQQY@DIY@ER.M<br>R.TVHDMQDFGQQQYDIY@ER.M<br>L.RSAVSPDLHITPIY@EGRT@YY.S<br>R.SAVSPDLHITPIY@EGRT@YVSPVYR.S<br>R.SAVS*PDLHITPIY@EGRTYVSPVYR.S                                                                                                                                                                                                       | Y368,Y371<br>Y371<br>Y414<br>Y414<br>Y414                                        | 2433.03<br>2354.91<br>2500.67<br>2944.88<br>2847.06                                                                   | 0.04<br>1.92<br>2.49<br>0.48<br>0.66                                                 | none<br>0.0699 R.TVHDMQDFGQQQY@DIYER.M<br>none<br>0.1987 R.SAVSPDLHIT@PIYEGRT@YVSPVYR.S<br>0.0934 R.SAVSPDLHIT*PIY@EGRTYVSPVYR.S                                                                                                                                                                                                                                                        |
| Scavenger receptor class F member 2 precursor                          | P59222 | R.SASSVEGSPGALY@AR.V                                                                                                                                                                                                                                                                                                                                        | Y615                                                                             | 1532.93                                                                                                               | 1.22                                                                                 | none                                                                                                                                                                                                                                                                                                                                                                                    |
| Tight junction protein ZO-1                                            | P39447 | R.LSYLSAPGSEY@SMYSTDSR.H<br>R.HEEQPAPAY@EVHNR.Y<br>L.RHEEQPAPAY@EVHNR.Y<br>R.YRPEAQPY@SSTGPK.S<br>Y.RPEAQPY@SSTGPKSSEPKQY.F<br>R.SNHY@DPEEDEEYR.K<br>R.SNHYDPEEDEEY@YR.K<br>R.SNHYDPEEDEEY@YR.K                                                                                                                                                             | Y830<br>Y1164<br>Y1164<br>Y1177<br>Y1177<br>Y1345<br>Y1353<br>Y1353              | 2194.55<br>1756.19<br>2077.52<br>1661.11<br>2318.46<br>2054.34<br>1926.92<br>2055.03                                  | 0.61<br>-0.59<br>1.59<br>0.34<br>1.38<br>0.53<br>1.20<br>1.22                        | 0.1378 R.LSYLSAPGS@EYMYSTDSR.H<br>none<br>0.1767 L.RHEEQPAPAYEVHNR.Y@R<br>0.0739 R.YRPEAQPY@SSTGPK.S<br>0.0051 Y.RPEAQPY@SSTGPKSSEPKQY.F<br>0.1312 R.S@NHYDPEEDEEYR.K<br>0.0304 R.SNHYDPEEDEEY@R.K<br>0.0759 R.SNHYDPEEDEEY@R.K                                                                                                                                                         |
| Tight junction protein ZO-2                                            | Q9Z0U1 | R.SYHEAY@EPDY@GGGYSYDRR.A<br>R.SYHEAY@EPDYGGGY@SPSYDRR.A<br>R.SYHEAY@EPDYGGGYSYDRR.A<br>R.SYHEAY@EPDY@GGGYSYDRR.A<br>R.VFLRPSPEDEAIY@GPNTK.M<br>F.LRPSPEDEAIY@GPNTK.MVRF.K<br>R.GLVREDAVLY@LLEIPKGETVTLAQRSR.A<br>R.IEIAQKHPDIY@AVPIK.A                                                                                                                     | Y230, Y234<br>Y230, Y238<br>Y230<br>Y234<br>Y486<br>Y486<br>Y554<br>Y1095        | 2630.83<br>2629.61<br>2550.44<br>2549.10<br>2113.78<br>2402.29<br>3064.68<br>1916.29                                  | 1.79<br>0.57<br>1.40<br>0.05<br>0.75<br>2.11<br>1.00<br>1.25                         | 0.1574 R.SYHEAY@EPDYGGGY@SPSYDRR.A<br>0.0614 R.SYHEAY@EPDY@GGGYSYDRR.A<br>0.0760 R.SYHEAY@EPDY@GGGYSYDRR.A<br>0.1245 R.SYHEAY@EPDYGGGYSYDRR.A<br>0.0464 R.VFLRPSPEDEAIY@GPNTK.M<br>none<br>none<br>none                                                                                                                                                                                 |
| <b>CYTOSKELETON: ACTIN-ASSOCIATED</b>                                  |        |                                                                                                                                                                                                                                                                                                                                                             |                                                                                  |                                                                                                                       |                                                                                      |                                                                                                                                                                                                                                                                                                                                                                                         |
| <b>Actins and actin-related proteins; Regulators of actin assembly</b> |        |                                                                                                                                                                                                                                                                                                                                                             |                                                                                  |                                                                                                                       |                                                                                      |                                                                                                                                                                                                                                                                                                                                                                                         |
| Actin, alpha skeletal muscle (Beta-actin) (Gamma-actin)                | P68134 | M.VGMGQKDSY@VGDEAQSKRGIL.T<br>K.IWHHTFY@NELR.V<br>K.EKLC*Y@VALDFENEM#ATAASSSSLEK.S                                                                                                                                                                                                                                                                          | Y55<br>Y93<br>Y220                                                               | 2319.16<br>1597.41<br>1596.60<br>2889.26                                                                              | 1.04<br>1.66<br>0.85<br>-0.01                                                        | 0.0262 M.VGMGQKDS@YVGDEAQSKRGIL.T<br>none<br>0.1687 K.IWHHT@FYNELR.V<br>none                                                                                                                                                                                                                                                                                                            |
| Actin, cytoplasmic 1 (Beta-actin)                                      | P70514 | K.EKLC*Y@VALDFEQEMATAASSSSLEK.S                                                                                                                                                                                                                                                                                                                             | Y218                                                                             | 2888.34                                                                                                               | 1.05                                                                                 | none                                                                                                                                                                                                                                                                                                                                                                                    |
| Beta-centractin                                                        | Q8R5C5 | R.TTGWVLDSDGQVTHAVPIY@EGFAMPHSIMR.V                                                                                                                                                                                                                                                                                                                         | Y171                                                                             | 3239.76                                                                                                               | 2.22                                                                                 | none                                                                                                                                                                                                                                                                                                                                                                                    |
| Actin-like protein 2 -- Arp2                                           | P61161 | K.HLWDY@TFGPEK.L<br>K.HLWDY@TFGPEKLNIDTR.N                                                                                                                                                                                                                                                                                                                  | Y91<br>Y91                                                                       | 1472.82<br>2186.70                                                                                                    | 0.16<br>1.65                                                                         | 0.0095 K.HLWDYT@FGPEK.L<br>0.0416 K.HLWDYT@FGPEKLNIDTR.N                                                                                                                                                                                                                                                                                                                                |
| Actin-like protein 3 - Arp3                                            | Q99JY9 | L.RAEPEDHY@F.L                                                                                                                                                                                                                                                                                                                                              | Y108                                                                             | 1243.06                                                                                                               | -0.45                                                                                | none                                                                                                                                                                                                                                                                                                                                                                                    |
| Actin-related protein 2/3 complex subunit 3 -- p21-ARC                 | Q9JM76 | F.KGPAPRETKDIDVDEAIY@Y.F<br>F.KGPAPRETKDIDVDEAIY@Y.F.K<br>K.DTIDVDEAIY@YF.K<br>Q.FKGPAPRETKDIDVDEAIY@Y.F                                                                                                                                                                                                                                                    | Y46<br>Y46<br>Y46<br>Y46                                                         | 2360.92<br>2509.45<br>1672.80<br>2508.91                                                                              | -0.21<br>1.25<br>1.05<br>0.71                                                        | 0.0307 F.KGPAPRETKDIDVDEAIY@Y.F<br>0.1436 F.KGPAPRETKDIDVDEAIY@Y.F.K<br>0.1190 K.DTIDVDEAIY@YF.K<br>0.0014 Q.FKGPAPRETKDIDVDEAIY@Y.F                                                                                                                                                                                                                                                    |
| Adenylyl cyclase-associated protein 1 -- CAP1                          | P40124 | R.LEAVSHTSDMHC*GY@GDSPSK.G                                                                                                                                                                                                                                                                                                                                  | Y30                                                                              | 2259.00                                                                                                               | 1.10                                                                                 | 0.1411 R.LEAVSHTSDMHC*GYGDS@PSK.G                                                                                                                                                                                                                                                                                                                                                       |
| Cofilin-1 non-muscle isoform                                           | P18760 | K.HELQANC*Y@EEVKDR.C<br>K.LTGKHELQANC*Y@EEVKDR.C                                                                                                                                                                                                                                                                                                            | Y139<br>Y139                                                                     | 1872.43<br>2383.98                                                                                                    | 1.63<br>0.86                                                                         | none<br>none                                                                                                                                                                                                                                                                                                                                                                            |
| Src substrate cortactin                                                | Q60598 | F.KAEPYRGSEPEPEY@SIEAAGIPEAGSQQLL.T<br>L.TYTSEPVY@ETTEAPGHY.Q<br>Y.TSEPVY@ETTEAPGHY.Q                                                                                                                                                                                                                                                                       | Y442<br>Y466<br>Y466                                                             | 3329.23<br>2025.91<br>2025.19<br>1762.84<br>1761.05                                                                   | 1.69<br>1.06<br>0.34<br>2.10<br>0.31                                                 | 0.0268 F.KAEPYRGSEPEPEYS@IEAAGIPEAGSQQLL.T<br>0.0481 L.TYT@SEPVYETTEAPGHY.Q<br>none<br>0.0775 Y.T@SEPVYETTEAPGHY.Q<br>0.1074 Y.TSEPVYET@ETTEAPGHY.Q                                                                                                                                                                                                                                     |
| Cytoplasmic FMR1 interacting protein 1                                 | Q7TMB8 | K.C*NEQPNRVEIY@EK.T                                                                                                                                                                                                                                                                                                                                         | Y108                                                                             | 1759.93                                                                                                               | 1.17                                                                                 | none                                                                                                                                                                                                                                                                                                                                                                                    |
| Coronin-1C                                                             | Q9WUM4 | R.YFEITDESPY@VHYLNTFSSKEPQR.G                                                                                                                                                                                                                                                                                                                               | Y301                                                                             | 3031.52                                                                                                               | 1.13                                                                                 | 0.0542 R.YFEITDES@PVHYLNTFSSKEPQR.G                                                                                                                                                                                                                                                                                                                                                     |
| N-WASP: Neural Wiskott-Aldrich syndrome protein                        | Q91YD9 | K.VIY@DFIEK.T                                                                                                                                                                                                                                                                                                                                               | Y253                                                                             | 1107.47                                                                                                               | 0.92                                                                                 | none                                                                                                                                                                                                                                                                                                                                                                                    |

|                                                          |         |                                                                                                            |                              |                                                     |                                      |                                                                                                                             |
|----------------------------------------------------------|---------|------------------------------------------------------------------------------------------------------------|------------------------------|-----------------------------------------------------|--------------------------------------|-----------------------------------------------------------------------------------------------------------------------------|
| Twinfilin-1                                              | Q91YR1  | R.KIEIDNGDELTAFLY@DEVHPK.Q                                                                                 | Y309                         | 2642.78                                             | 1.54                                 | none                                                                                                                        |
| Twinfilin-2                                              | Q9Z0P5  | K.KIEIGDGAELTAFLY@DEVHPK.Q                                                                                 | Y309                         | 2555.74                                             | 1.50                                 | none                                                                                                                        |
| Vasodilator-stimulated phosphoprotein -- VASP            | P70460  | F.SRVQIY@HNPTANSF.R<br>R.VQIY@HNPTANSF.R                                                                   | Y39<br>Y39                   | 1715.31<br>1628.13<br>1628.22                       | 1.50<br>1.35<br>1.44                 | none<br>none<br>none                                                                                                        |
| WD-repeat protein 1 -- Actin interacting protein 1, AIP1 | O88342  | F.IYDGGTKGEKVC*ALGESKAHDGGIY@AISW.S<br>K.AHDGGIY@AISWSPDSTHLLSASGDK.T<br>K.AHDGGIY@AISWSPDSTHLLSASGDKTSK.I | Y237<br>Y237<br>Y237         | 3106.90<br>2667.52<br>2983.39                       | 1.45<br>2.29<br>1.99                 | none<br>0.1793 K.AHDGGIY@AISWSPDSTHLLSASGDK.T<br>0.0600 K.AHDGGIY@AISWSPDSTHLLSASGDKTSK.I                                   |
| <b>Other actin-associated proteins</b>                   |         |                                                                                                            |                              |                                                     |                                      |                                                                                                                             |
| Alpha-actinin 1                                          | Q7TPR4  | R.HRPELIDY@GK.L<br>K.AIM#TYVSSFY@HAFSGAQK.A<br><br>K.AIMTYVSSFY@HAFSGAQK.A                                 | Y193<br>Y246<br><br>Y246     | 1308.32<br>2105.98<br>2105.69<br>2090.46<br>2088.72 | 0.67<br>2.02<br>1.73<br>2.50<br>0.76 | none<br>0.1464 K.AIM#TYVSS@FYHAFSGAQK.A<br>0.0812 K.AIM#TYVSS@FYHAFSGAQK.A<br>none<br>0.1050 K.AIMTYVSS@FYHAFSGAQK.A        |
| Anillin                                                  | Q8K298  | R.AESADSLGSEDRDLY@SIDAYR.S                                                                                 | Y666                         | 2527.33                                             | 1.19                                 | 0.1358 R.AESADSLGSEDRDLY@SIDAYR.S                                                                                           |
| Calponin-3                                               | Q9DAW9  | Y.HGEYDDY@PREY.Q<br>Y.HGEYDDY@PREY.Q@QYGDQIDY.-                                                            | Y316<br>Y320                 | 1622.10<br>2775.84                                  | 1.47<br>0.75                         | 0.1785 Y.HGEYDDY@PREY.Q<br>0.1461 Y.HGEYDDY@PREY.Q@QYGDQIDY.-                                                               |
| Filamin-B                                                | Q80X90  | K.GFLDGVY@SFEYYPSTPGK.Y<br>K.QKGFLDGVY@SFEYYPSTPGK.Y<br>M.KSRMDGT@AC*SY.T<br>R.MDGT@AC*SYTPLK.A            | Y511<br>Y511<br>Y704<br>Y704 | 2108.30<br>2363.77<br>1518.67<br>1587.73            | 1.36<br>0.67<br>0.08<br>1.08         | 0.0622 K.GFLDGVY@SFEYYPSTPGK.Y<br>0.0795 K.QKGFLDGVY@SFEYYPSTPGK.Y<br>0.0280 M.KSRMDGT@AC*SY.T<br>0.0802 R.MDGT@AC*SYTPLK.A |
| Girdin                                                   | Q5SNZ0  | K.TEDAY@TISSAGKPTSTQG.I<br>L.RTGPQKTEDAY@TISSAGKPTSTQG.G                                                   | Y1739<br>Y1739               | 2120.28<br>2601.97                                  | 1.29<br>0.72                         | 0.1079 K.TEDAY@TISSAGKPTSTQG.I<br>0.1136 L.RTGPQKT@EDAYTISSAGKPTSTQG.G                                                      |
| LIM and SH3 domain protein 1 -- LASP-1                   | Q61792  | H.HIPTSAPVY@QQPQQQM.T                                                                                      | Y173                         | 2060.61                                             | -0.35                                | none                                                                                                                        |
| Moesin                                                   | P26041  | K.EGILNDDIY@C*PPETAVLLASYAVQSK.Y                                                                           | Y115                         | 2947.46                                             | 1.06                                 | 0.1893 K.EGILNDDIY@C*PPETAVLLASYAVQSK.Y                                                                                     |
| Myosin-9                                                 | Q8VDD5  | R.HEMPPHIY@AITDTAYR.S                                                                                      | Y150                         | 1996.03                                             | 1.11                                 | 0.1968 R.HEMPPHIY@AITDTAYR.S                                                                                                |
| Myosin-10                                                | Q61879  | R.AVIY@NPATQADWTAK.K<br>Y.LFVDRAVIY@NPATQADW.T                                                             | Y22<br>Y22                   | 1729.74<br>2059.21                                  | 0.91<br>0.21                         | none<br>none                                                                                                                |
| PDZ and LIM domain protein 1                             | O70400  | R.VITNQNSPTGLY@SSENISNFNNAVESK.T                                                                           | Y148                         | 3172.07                                             | 1.60                                 | 0.0349 R.VITNQNSPT@GLYSSENISNFNNAVESK.T                                                                                     |
| Profilin-1                                               | P10924  | K.C*Y@EMASHLR.R                                                                                            | Y128                         | 1247.39                                             | 0.90                                 | none                                                                                                                        |
| Profilin-2                                               | Q9J JV2 | K.SQGGPEY@NVAVGR.A                                                                                         | Y98                          | 1515.34                                             | 0.64                                 | 0.0172 K.SQGGPEY@NVAVGR.A                                                                                                   |
| Septin-2                                                 | P42208  | K.QQPTQFINPETPGY@VGFANLPNQVHR.K                                                                            | Y17                          | 3033.18                                             | 0.70                                 | 0.1368 K.QQPTQFINPET@PGYVGFANLPNQVHR.K                                                                                      |
| Septin-7                                                 | O55131  | K.NLEGY@VGFANLPNQVYR.K<br>R.KLAAVY@NGVDNKN.N<br>R.KLAAVY@NGVDNKNK.G                                        | Y29<br>Y318<br>Y318          | 2034.72<br>1587.31<br>1827.66                       | 0.74<br>0.52<br>-1.27                | none<br>0.0620 R.KLAAVY@NGVDNKN.N<br>0.0113 R.KLAAVY@NGVDNKNK.G                                                             |
| Synaptopodin                                             | Q8CC35  | R.TPPASLY@HGYLPENGLRPEPTK.Q                                                                                | Y775                         | 2618.09                                             | 1.77                                 | 0.0762 R.TPPAS@LYHGYLPENGLRPEPTK.Q                                                                                          |
| <b>CYTOSKELETON: MICROTUBULE-ASSOCIATED</b>              |         |                                                                                                            |                              |                                                     |                                      |                                                                                                                             |
| Tubulin alpha-1 chain                                    | P68369  | F.MVDNEAIY@DIC*RR.N<br>F.MVDNEAIY@DIC*.R<br>F.MVDNEAIY@DIC*RRNLDIERPTY.T                                   | Y210<br>Y210<br>Y210         | 1736.18<br>1424.03<br>2837.23                       | 1.43<br>1.49<br>0.93                 | none<br>none<br>none                                                                                                        |
| Tubulin beta-3 chain                                     | Q9ERD7  | Y.C*IDNEALY@DIC*.F.R<br>K.NSSY@FVEWIPNNVK.V                                                                | Y208<br>Y340                 | 1613.52<br>1777.38                                  | 0.92<br>0.55                         | none<br>0.0804 K.NS@SYFVEWIPNNVK.V                                                                                          |
| CLIP-associating protein 2 -- CLASP2                     | Q8BRT1  | R.DYNPY@NYSDSISPFNK.S                                                                                      | Y1014                        | 2005.52                                             | 1.68                                 | 0.1369 R.DY@NPYNSDSISPFNK.S                                                                                                 |
| Dynein heavy chain, cytosolic                            | Q9JHU4  | R.YQVGVHY@ELTEEEKFYR.N                                                                                     | Y1008                        | 2271.25                                             | 1.20                                 | none                                                                                                                        |
| Kinesin light chain 1                                    | O88447  | K.DGSFGEY@GGWYK.A<br>K.QKDGSAFGEY@GGWYK.A                                                                  | Y444<br>Y444                 | 1516.59<br>1774.01                                  | -0.02<br>1.24                        | none<br>0.1585 K.QKDGSAFGEY@GGWYK.A                                                                                         |
| Kinesin light chain 2                                    | Q91YS4  | R.DSAPYGEY@GSWYK.A                                                                                         | Y434                         | 1602.38                                             | -0.27                                | 0.0823 R.DSAPYGEY@GSWYK.A                                                                                                   |
| Kinesin-associated protein 3 -- KAP3                     | P70188  | R.PATAYGFRPDEPY@YYSFGSR.-<br>R.PATAYGFRPDEPY@YYSFGSR.-<br>R.PATAYGFRPDEPY@YYSFGSR.-                        | Y786<br>Y787<br>Y788         | 2426.06<br>2425.97<br>2424.91                       | 1.99<br>1.90<br>0.84                 | 0.0252 R.PATAYGFRPDEPY@YYSFGSR.-<br>0.0538 R.PATAYGFRPDEPY@YYSFGSR.-<br>0.0346 R.PATAYGFRPDEPY@YYSFGSR.-                    |

|                                                                  |                   |                                                                                                                                                                                                                                                                                  |                                                                                           |                                                                                                                       |                                                                                      |                                                                                                                                                                                                                                                                                                |
|------------------------------------------------------------------|-------------------|----------------------------------------------------------------------------------------------------------------------------------------------------------------------------------------------------------------------------------------------------------------------------------|-------------------------------------------------------------------------------------------|-----------------------------------------------------------------------------------------------------------------------|--------------------------------------------------------------------------------------|------------------------------------------------------------------------------------------------------------------------------------------------------------------------------------------------------------------------------------------------------------------------------------------------|
| Kinesin family member 11                                         | Q6P9P6            | R.SPNEVY@TWEEDPLAGIIPR.T                                                                                                                                                                                                                                                         | Y124                                                                                      | 2266.86                                                                                                               | 0.78                                                                                 | 0.0874 R.SPNEVYT@WEEDPLAGIIPR.T                                                                                                                                                                                                                                                                |
| Microtubule-associated protein 1B -- MAP 1B                      | P14873            | K.VLSPLRS@PPLLGSSESPY@EDFLSADSK.V<br>R.SPPLLGSSESPY@EDFLSADSK.V                                                                                                                                                                                                                  | Y1405<br>Y1405                                                                            | 2966.93<br>2221.32                                                                                                    | 2.49<br>2.31                                                                         | 0.0892 K.VLS@PLRSPPLLGSSESPY@EDFLSADSK.V<br>0.1381 R.SPPLLGSSES@PYEDFLSADSK.V                                                                                                                                                                                                                  |
| Microtubule-associated protein 1B -- isoform                     | UPI0000021<br>C8B | R.THDTVGGY@YEKTER.T                                                                                                                                                                                                                                                              | Y1901                                                                                     | 1798.86                                                                                                               | 1.08                                                                                 | 0.1121 R.THDTVGGY@YEKTER.T                                                                                                                                                                                                                                                                     |
| Microtubule-associated protein 4 -- MAP 4                        | P27546            | F.TERDNPSSEDSY@GMLPC*DSF.A                                                                                                                                                                                                                                                       | Y176                                                                                      | 2300.12                                                                                                               | 0.26                                                                                 | 0.0760 F.TERDNPSSEDS@YGMLPC*DSF.A                                                                                                                                                                                                                                                              |
| Nuclear distribution protein nudE homolog 1 -- NudE              | Q9CZA6            | R.NFMY@DQSPSR.T                                                                                                                                                                                                                                                                  | Y279                                                                                      | 1325.61                                                                                                               | 1.07                                                                                 | none                                                                                                                                                                                                                                                                                           |
| PREDICTED: similar to centrosome spindle pole associated protein | UPI0000D65<br>977 | R.TPYDDAY@YFYGAR.N                                                                                                                                                                                                                                                               | Y468                                                                                      | 1683.35                                                                                                               | 1.66                                                                                 | 0.1372 R.TPYDDAY@YFYGAR.N                                                                                                                                                                                                                                                                      |
| Platelet-activating factor acetylhydrolase 1B alpha subunit      | P63005            | R.SNGYEEAY@SVFKK.E                                                                                                                                                                                                                                                               | Y27                                                                                       | 1602.23                                                                                                               | 0.51                                                                                 | 0.1109 R.SNGYEEAYS@VFKK.E                                                                                                                                                                                                                                                                      |
| RCC2 protein                                                     | Q8BK67            | R.VFSWGFGGY@GR.L                                                                                                                                                                                                                                                                 | Y357                                                                                      | 1313.16                                                                                                               | 0.58                                                                                 | none                                                                                                                                                                                                                                                                                           |
| <b>CYTOSKELETON: OTHER</b>                                       |                   |                                                                                                                                                                                                                                                                                  |                                                                                           |                                                                                                                       |                                                                                      |                                                                                                                                                                                                                                                                                                |
| Plectin 1                                                        | Q6S394            | Y.VSSLY@DAMPRVPGAQDGV RANEL.Q<br>K.AVTGYRDPY@SGQSVSLFQALK.K<br>K.AVTGYRDPY@SGQSVSLFQALK.K.G<br>R.ARQEEVY@SELQAR.E<br><br>R.LTAEDLY@EAR.I<br>R.QQNLASY@DYVVR.R<br>R.AVTGYKDPY@SGK.L<br>R.LLEAAAQSSKGY@YSPYSVSGSGSTAGSR.T<br>K.GYYSPTY@S@VSGSGSTAGSR.T<br>K.GYYSPTY@SVSGSGSTAGSR.T | Y288<br>Y3134<br>Y3134<br>Y3250<br><br>Y3678<br>Y3665<br>Y4043<br>Y4499<br>Y4503<br>Y4503 | 2525.96<br>2369.33<br>2496.52<br>1660.12<br>1658.80<br>1260.95<br>1437.36<br>1366.36<br>2862.50<br>1943.55<br>1863.40 | 0.74<br>2.16<br>1.25<br>1.33<br>0.01<br>0.37<br>0.71<br>0.72<br>1.17<br>0.76<br>0.61 | none<br>0.0091 K.AVTGY@RDPYSGQSVSLFQALK.K<br>0.0489 K.AVTGYRDPYS@GQSVSLFQALK.K.G<br>0.1558 R.ARQEEVYS@ELQAR.E<br>0.0940 R.ARQEEVYS@ELQAR.E<br>none<br>0.0656 R.QQNLAS@DYVVR.R<br>0.1227 R.AVTGYKDPYS@GK.L<br>0.0213 R.LLEAAAQSSKGY@SPYSVSGSGSTAGSR.T<br>none<br>0.0626 K.GYYSPTY@VSGSGSTAGSR.T |
| Protein 4.1                                                      | P48193            | K.VSLDDTVY@EC*VVEK.H                                                                                                                                                                                                                                                             | Y223                                                                                      | 1849.85                                                                                                               | 1.00                                                                                 | 0.1719 K.VSLDDTVY@VVEK.H                                                                                                                                                                                                                                                                       |
| Spectrin beta chain, brain 1                                     | Q62261            | L.KIVSSNDVGHDEY@STQ.S                                                                                                                                                                                                                                                            | Y777                                                                                      | 1859.55                                                                                                               | 0.73                                                                                 | 0.0106 L.KIVSSNDVGHDEYS@TQ.S                                                                                                                                                                                                                                                                   |
| Vimentin                                                         | P20152            | R.TY@SLGSALRPSTSR.S<br>L.RPSTSRSLY@SSSPGGAY.V<br>R.SLY@SSSPGGAYVTR.S<br>R.SLY@SSSPGGAYVTR.S<br>S.RSLY@SSSPGGAY.V<br>S.TSRSLY@SSSPGGAY.V                                                                                                                                          | Y37<br>Y52<br>Y52<br>Y52<br>Y52<br>Y52                                                    | 1576.54<br>1853.19<br>1604.85<br>1525.10<br>1324.93<br>1513.29                                                        | 0.75<br>0.33<br>0.14<br>0.39<br>0.34<br>0.62                                         | 0.0470 R.T@YSLGSALRPSTSR.S<br>0.0421 L.RPSTSRSLY@SSSPGGAY.V<br>0.0825 R.S@LYSSSPGGAYVTR.S<br>0.0869 R.S@LYSSSPGGAYVTR.S<br>0.0926 S.RSLY@SSSPGGAY.V<br>0.1063 S.TSRSLY@SSSPGGAY.V                                                                                                              |
| <b>TRAFFICKING/TRANSPORT</b>                                     |                   |                                                                                                                                                                                                                                                                                  |                                                                                           |                                                                                                                       |                                                                                      |                                                                                                                                                                                                                                                                                                |
| <b>Vesicle transport</b>                                         |                   |                                                                                                                                                                                                                                                                                  |                                                                                           |                                                                                                                       |                                                                                      |                                                                                                                                                                                                                                                                                                |
| Adapter-related protein complex 3 mu 1 subunit                   | Q9JKC8            | K.SVWSQSYC*DY@FFEAQEK.A                                                                                                                                                                                                                                                          | Y31                                                                                       | 2104.36                                                                                                               | 1.47                                                                                 | none                                                                                                                                                                                                                                                                                           |
| Clathrin heavy chain                                             | Q68FD5            | R.ALEHFTDLY@DIKR.A<br>R.FLRENPY@YDSR.V                                                                                                                                                                                                                                           | Y634<br>Y899                                                                              | 1702.03<br>1540.32                                                                                                    | 1.19<br>0.62                                                                         | none<br>0.1987 R.FLRENPY@DSR.V                                                                                                                                                                                                                                                                 |
| Coatamer protein complex subunit alpha                           | Q8BTF0            | R.VKGNVY@C*LDR.E                                                                                                                                                                                                                                                                 | Y 579                                                                                     | 1418.38                                                                                                               | 0.73                                                                                 | 0.0197 K.MERS@SHPLHQSSSIKPEK.K                                                                                                                                                                                                                                                                 |
| Coatamer beta subunit                                            | Q9JIF7            | K.LVTEMGTY@ATQSALSSSRPTKK.E                                                                                                                                                                                                                                                      | Y521                                                                                      | 2438.20                                                                                                               | 1.98                                                                                 | 0.0183 K.LVTEMGT@YATQSALSSSRPTKK.E                                                                                                                                                                                                                                                             |
| Coatamer beta' subunit                                           | O55029            | K.GVNC*IDYY@SGGDKPYLISGADDR.L                                                                                                                                                                                                                                                    | Y194                                                                                      | 2615.95                                                                                                               | 0.83                                                                                 | 0.0193 K.GVNC*IDYYS@GGDKPYLISGADDR.L                                                                                                                                                                                                                                                           |
| HECT domain and RCC1-like domain-containing protein 2 -- Herc2   | Q4U2R1            | R.SRTPLDKDLINTGIY@ESSGK.Q<br>R.TPLDKDLINTGIY@ESSGK.Q                                                                                                                                                                                                                             | Y999<br>Y999                                                                              | 2275.28<br>2031.84                                                                                                    | 1.14<br>0.84                                                                         | 0.0535 R.SRTPLDKDLINT@GIYESSGK.Q<br>0.0734 R.TPLDKDLINTGIYESS@GK.Q                                                                                                                                                                                                                             |
| Intersectin 2                                                    | Q9Z0R6            | R.GEPEALY@AAVTK.K                                                                                                                                                                                                                                                                | Y 921                                                                                     | 1328.72                                                                                                               | 0.06                                                                                 | none                                                                                                                                                                                                                                                                                           |
| Lysosomal trafficking regulator                                  | P97412            | R.AVWYDPIY@YPTSWQLDPTTEGPNR.E                                                                                                                                                                                                                                                    | Y 2929                                                                                    | 2848.69<br>2850.18                                                                                                    | 0.39<br>1.88                                                                         | 0.0161 R.AVWYDPIY@YPTSWQLDPTTEGPNR.E<br>0.0527 R.AVWY@DPIYPTSWQLDPTTEGPNR.E                                                                                                                                                                                                                    |
| SEC24 related gene family, member B                              | Q80ZX0            | K.MTSLPLDSQC*DSY@YSRPTYVPTQNSGTPSSAN<br>QPGAQQMYGR.G<br>R.LDDRIVY@AMC*QMK.S                                                                                                                                                                                                      | Y79<br>Y1083                                                                              | 4722.60<br>1610.79                                                                                                    | 1.55<br>1.12                                                                         | none<br>none                                                                                                                                                                                                                                                                                   |
| SH3-containing GRB2-like protein 1                               | Q62419            | K.ALY@DFEPENDGELGFR.E                                                                                                                                                                                                                                                            | Y315                                                                                      | 1954.22                                                                                                               | 2.28                                                                                 | none                                                                                                                                                                                                                                                                                           |
| Sorting nexin-9                                                  | Q91VH2            | K.IAIVGDY@GPMWVYPTSTFDC*VADPR.K<br>L.AKPKEKIAIVGDY@GPM#W<br>L.AKPKEKIAIVGDY@GPM.W                                                                                                                                                                                                | Y239<br>Y239<br>Y239                                                                      | 3124.76<br>1927.77<br>1910.61<br>1910.30                                                                              | 2.31<br>1.75<br>0.59<br>0.28                                                         | none<br>none<br>none<br>none                                                                                                                                                                                                                                                                   |

|                                                         |        |                                                                                                                                                                                                                                                                                                                    |                                                                                      |                                                                                                                       |                                                                                      |                                                                                                                                                                                                                                                                                      |
|---------------------------------------------------------|--------|--------------------------------------------------------------------------------------------------------------------------------------------------------------------------------------------------------------------------------------------------------------------------------------------------------------------|--------------------------------------------------------------------------------------|-----------------------------------------------------------------------------------------------------------------------|--------------------------------------------------------------------------------------|--------------------------------------------------------------------------------------------------------------------------------------------------------------------------------------------------------------------------------------------------------------------------------------|
| Sorting nexin 17                                        | Q8R0N8 | R.KSYWDSAY@DDDDVEMENR.V                                                                                                                                                                                                                                                                                            | Y210                                                                                 | 2076.21<br>2075.41                                                                                                    | 2.39<br>1.59                                                                         | 0.0794 R.KSYWDS@AYDDDDVEMENR.V<br>0.0915 R.KSYWDS@AYDDDDVEMENR.V                                                                                                                                                                                                                     |
| Transitional endoplasmic reticulum ATPase -- TER ATPase | Q01853 | K.VVETDPSY@C*IVAPDVIHC*EGEPIKR.E<br>R.GILLY@GPPGTGK.T                                                                                                                                                                                                                                                              | Y172<br>Y243                                                                         | 3161.60<br>1253.07                                                                                                    | 0.14<br>0.40                                                                         | 0.1175 K.VVETDPS@PYC*IVAPDVIHC*EGEPIKR.E<br>none                                                                                                                                                                                                                                     |
| <b>Nucleocytoplasmic transport</b>                      |        |                                                                                                                                                                                                                                                                                                                    |                                                                                      |                                                                                                                       |                                                                                      |                                                                                                                                                                                                                                                                                      |
| GTP-binding nuclear protein Ran                         | P62827 | K.NLQY@YDISAK.S<br>R.KKNLQY@YDISAK.S<br>K.NLQY@YDISAK.S<br>K.SNY@NFEKPFWLAR.K                                                                                                                                                                                                                                      | Y145<br>Y145<br>Y146<br>Y154                                                         | 1296.40<br>1552.09<br>1294.80<br>1865.38                                                                              | 1.79<br>1.29<br>0.19<br>0.47                                                         | 0.0204 K.NLQY@YDISAK.S<br>0.1394 R.KKNLQY@YDISAK.S<br>0.0155 K.NLQY@YDISAK.S<br>none                                                                                                                                                                                                 |
| Importin-9                                              | Q91YE6 | R.VKGEEIY@SMDEGIR.T                                                                                                                                                                                                                                                                                                | Y888                                                                                 | 1708.23<br>1705.73                                                                                                    | 2.44<br>-0.06                                                                        | 0.1530 R.VKGEEIYS@MDEGIR.T<br>0.0703 R.VKGEEIYS@MDEGIR.T                                                                                                                                                                                                                             |
| RAE1 RNA export 1 homolog                               | Q8C570 | R.SNGTNTSAPQDIY@AVNGIAFHPVHGLTAVGSDGR.F                                                                                                                                                                                                                                                                            | Y274                                                                                 | 3606.69                                                                                                               | 1.97                                                                                 | 0.1796 R.SNGTNTS@APQDIYAVNGIAFHPVHGLTAVGSDGR.F                                                                                                                                                                                                                                       |
| Ran-binding protein 2                                   | Q9ERU9 | R.GDDY@FNYNVQQTSTNPPLPEPGYFTKPLVAHASR.S<br>K.EGPY@WNC*NSC*SFK.N                                                                                                                                                                                                                                                    | Y960<br>Y1349                                                                        | 4003.16<br>1729.49                                                                                                    | 2.27<br>0.88                                                                         | 0.0485 R.GDDYFNY@NVQQTSTNPPLPEPGYFTKPLVAHASR.S<br>none                                                                                                                                                                                                                               |
| <b>Other transport</b>                                  |        |                                                                                                                                                                                                                                                                                                                    |                                                                                      |                                                                                                                       |                                                                                      |                                                                                                                                                                                                                                                                                      |
| none                                                    |        |                                                                                                                                                                                                                                                                                                                    |                                                                                      |                                                                                                                       |                                                                                      |                                                                                                                                                                                                                                                                                      |
| <b>METABOLIC AND BIOSYNTHETIC ENZYMES</b>               |        |                                                                                                                                                                                                                                                                                                                    |                                                                                      |                                                                                                                       |                                                                                      |                                                                                                                                                                                                                                                                                      |
| <b>Glycolytic enzymes</b>                               |        |                                                                                                                                                                                                                                                                                                                    |                                                                                      |                                                                                                                       |                                                                                      |                                                                                                                                                                                                                                                                                      |
| Alpha enolase (beta-enolase) (gamma enolase)            | P17182 | R.GNPTVEVDLY@TAK.G<br>F.DSRGNPTVEVDLY@TAKGLF.R<br>F.DSRGNPTVEVDLY@TAKGLF.R.A<br>F.RAAVPSGASTGIY@EAL.E<br>F.RAAVPSGASTGIY@EAL.E.R<br>R.AAVPSGASTGIY@EAL.E.R.D<br><br>F.RAAVPSGASTGIY@EAL.E.RDNDKTRF.M<br>R.AAVPSGASTGIY@EAL.E.RDNDK.T<br>R.IGAEVY@HNLK.N                                                            | Y24<br>Y24<br>Y24<br>Y43<br>Y43<br>Y43<br>Y43<br>Y43<br>Y43<br>Y188                  | 1487.27<br>2162.49<br>2319.34<br>1644.40<br>1885.73<br>1885.92<br>1886.66<br>2918.54<br>2357.70<br>1223.84            | 0.55<br>0.44<br>1.19<br>1.58<br>0.79<br>0.97<br>1.71<br>1.09<br>0.56<br>0.22         | 0.0992 R.GNPTVEVDLY@TAK.G<br>0.0913 F.DSRGNPTVEVDLY@TAKGLF.R<br>0.0881 F.DSRGNPTVEVDLY@TAKGLF.R.A<br>none<br>0.1412 F.RAAVPSGAST@GIY@EAL.E.R<br>none<br>0.1261 R.AAVPSGAST@GIY@EAL.E.R.D<br>0.0612 F.RAAVPSGAST@GIY@EAL.E.RDNDKTRF.M<br>0.1774 R.AAVPSGAST@GIY@EAL.E.RDNDK.T<br>none |
| GAPDH: Glyceraldehyde-3-phosphate dehydrogenase         | P16858 | F.VKLISWYDNEY@GY.S<br>K.LISWYDNEY@GYSNR.V<br><br>L.ISWYDNEY@GY.S<br>L.ISWYDNEY@GYSNRVVDL.M                                                                                                                                                                                                                         | Y315<br>Y315<br><br>Y315<br>Y315                                                     | 1731.19<br>1860.51<br>1861.29<br>1390.09<br>2173.71                                                                   | 1.41<br>0.71<br>1.49<br>0.55<br>0.75                                                 | 0.0992 F.VKLISWYDNEY@GY.S<br>none<br>0.1354 K.LISWYDNEY@GYSNR.V<br>none<br>none                                                                                                                                                                                                      |
| L-lactate dehydrogenase A chain                         | P06151 | W.KEVHKQVVDVDS@AYEVIKL.K                                                                                                                                                                                                                                                                                           | Y238                                                                                 | 2065.71                                                                                                               | 0.60                                                                                 | 0.0596 W.KEVHKQVVDVDS@AYEVIKL.K                                                                                                                                                                                                                                                      |
| 6-phosphofructokinase, liver type                       | P12382 | K.C*HEHYTFELY@NLYSSEGR.G                                                                                                                                                                                                                                                                                           | Y639                                                                                 | 2487.79                                                                                                               | 1.77                                                                                 | none                                                                                                                                                                                                                                                                                 |
| Phosphoglycerate mutase 1                               | Q9DBJ1 | F.SGWY@DADLSPAGHEEAKRGGQAL.R<br>F.SGWY@DADLSPAGHEEAKRGGQ.A<br>R.FSGWY@DADLSPAGHEEAK.R<br><br>R.FSGWY@DADLSPAGHEEAKR.G                                                                                                                                                                                              | Y25<br>Y25<br>Y25<br><br>Y25                                                         | 2497.02<br>2312.53<br>2060.43<br>2061.53<br>2215.86<br>2216.83                                                        | 1.89<br>1.52<br>0.55<br>1.65<br>-0.12<br>0.84                                        | 0.0093 F.S@GWYDADLSPAGHEEAKRGGQAL.R<br>0.1254 F.S@GWYDADLSPAGHEEAKRGGQ.A<br>0.1895 R.FS@GWYDADLSPAGHEEAKR<br>0.0797 R.FS@GWYDADLSPAGHEEAKR<br>none<br>0.0203 R.FS@GWYDADLSPAGHEEAKR.G                                                                                                |
| Pyruvate kinase, isozyme M2                             | P52480 | R.EATESFASDPILY@RPVAVALDTK.G<br>R.EATESFASDPILY@RPVAVALDTKGPDIR.T<br>Y.HAETIKNVREATESFASDPILY@RPVAVAL.D<br>K.ITLDNAY@MEKC*DENILWLDYK.N<br>L.IAREAAIY@HLQL.F<br>L.IAREAAIY@HL.Q<br>L.IAREAAIY@HLQL.F.E<br>L.IAREAAIY@HLQL.FEEL.R<br>M.QHLIAREAAIY@HLQL.FEEL.R<br>R.EAAAIY@HLQL.FEEL.R.R<br>R.EAAAIY@HLQL.FEEL.R.R.L | Y104<br>Y104<br>Y104<br>Y147<br>Y389<br>Y389<br>Y389<br>Y389<br>Y389<br>Y389<br>Y389 | 2575.27<br>3127.25<br>3278.92<br>2728.04<br>1678.08<br>1437.13<br>1827.32<br>2196.18<br>2576.78<br>2013.22<br>2169.17 | 1.98<br>1.66<br>1.22<br>0.82<br>0.21<br>0.40<br>2.38<br>0.07<br>2.47<br>1.23<br>1.08 | none<br>0.1336 R.EATESFAS@DPILYRPVAVALDTKGPDIR.T<br>0.1694 Y.HAETIKNVREATESFAS@DPILYRPVAVAL.D<br>0.1779 K.IT@LDNAYMEKC*DENILWLDYK.N<br>none<br>none<br>none<br>none<br>none<br>none<br>none                                                                                          |
| <b>Other metabolic/biosynthetic enzymes</b>             |        |                                                                                                                                                                                                                                                                                                                    |                                                                                      |                                                                                                                       |                                                                                      |                                                                                                                                                                                                                                                                                      |
| ADP/ATP translocase 2                                   | P51881 | R.AAYFGIY@DTAK.G                                                                                                                                                                                                                                                                                                   | Y194                                                                                 | 1300.18                                                                                                               | 0.58                                                                                 | 0.0091 R.AAYFGIY@DTAK.G                                                                                                                                                                                                                                                              |
| ATP citrate lyase                                       | Q91V92 | R.TTDGVY@EGVAIGDRYPGSTFMDHVL.R.Y<br>R.TTDGVY@EGVAIGDRYPGSTFMDHVL.R.Y                                                                                                                                                                                                                                               | Y 672<br>Y 672                                                                       | 2995.35<br>3011.67                                                                                                    | 1.97<br>2.28                                                                         | 0.1688 R.TT@DGVYEGVAIGDRYPGSTFMDHVL.R.Y<br>0.1310 R.TT@DGVYEGVAIGDRYPGSTFMDHVL.R.Y                                                                                                                                                                                                   |
| Aldo-keto reductase family 1 member C18                 | Q8K023 | K.IELNDGHSIPVLGFGTY@ATEEHLK.K                                                                                                                                                                                                                                                                                      | Y24                                                                                  | 2721.66                                                                                                               | 1.33                                                                                 | 0.0445 K.IELNDGHSIPVLGFGTY@ATEEHLK.K                                                                                                                                                                                                                                                 |
| Aldo-keto reductase family 1, member B3                 | Q5U415 | R.HIDC*AQVY@QNEK.E<br>R.HIDC*AQVY@QNEKEVGVALQEK.L                                                                                                                                                                                                                                                                  | Y49                                                                                  | 1585.25<br>2538.86                                                                                                    | 0.59<br>0.68                                                                         | none<br>none                                                                                                                                                                                                                                                                         |

|                                                           |        |                                                                                                                                                                                                |                                                                          |                                                                                                                       |                                                                                      |                                                                                                                                                                                                                                                                                                             |
|-----------------------------------------------------------|--------|------------------------------------------------------------------------------------------------------------------------------------------------------------------------------------------------|--------------------------------------------------------------------------|-----------------------------------------------------------------------------------------------------------------------|--------------------------------------------------------------------------------------|-------------------------------------------------------------------------------------------------------------------------------------------------------------------------------------------------------------------------------------------------------------------------------------------------------------|
| Aldose reductase-related protein 2                        | P45377 | R.AC*LLPETVNMEEPYDAEY@-<br>W.RAC*LLPETVNMEEPYDAEY@-                                                                                                                                            | Y315<br>Y315                                                             | 2389.42<br>2543.25                                                                                                    | 2.46<br>0.19                                                                         | 0.0421 R.AC*LLPETVNMEEPY@DAEY-<br>0.0880 W.RAC*LLPETVNMEEPY@DAEY-                                                                                                                                                                                                                                           |
| Adenylosuccinate synthetase, non-muscle isozyme           | P46664 | K.DGVY@FLYEALHGPPK.K<br>K.DGVY@FLYEALHGPPK.I<br>K.DGVYFLY@EALHGPPK.I                                                                                                                           | Y236<br>Y236<br>Y239                                                     | 1786.69<br>1915.78<br>1915.42                                                                                         | 0.83<br>1.83<br>1.47                                                                 | 0.1974 K.DGVYFLY@EALHGPPK.K<br>none<br>none                                                                                                                                                                                                                                                                 |
| Bifunctional purine biosynthesis protein PURH             | Q9CWJ9 | L.SEDEARVC*MVY@DLYPTLPLA<br>R.VC*M#VY@DLYPTLPLAVAYAR.A<br><br>R.VC*MVY@DLYPTLPLAVAYAR.A<br><br>R.VC*MVYDLY@PTLPLAVAYAR.A                                                                       | Y290<br>Y290<br><br>Y290<br><br>Y293                                     | 2452.49<br>2412.86<br>2413.65<br>2397.51<br>2396.96<br>2398.64                                                        | 0.40<br>0.70<br>1.49<br>1.35<br>0.80<br>2.48                                         | none<br>0.1387 R.VC*M#VYDLY@PTLPLAVAYAR.A<br>none<br>0.0339 R.VC*MVYDLY@PTLPLAVAYAR.A<br>0.1803 R.VC*MVYDLY@PTLPLAVAYAR.A<br>0.0159 R.VC*MVY@DLYPTLPLAVAYAR.A                                                                                                                                               |
| CTP synthase                                              | P70698 | Y.INIDAGTFSPY@EHGEV.F.V                                                                                                                                                                        | Y53                                                                      | 1977.27                                                                                                               | 1.39                                                                                 | 0.0857 Y.INIDAGTF@PYEHGEV.F.V                                                                                                                                                                                                                                                                               |
| Glycerol-3-phosphate dehydrogenase 2                      | Q8VDT0 | R.FLYY@EMGYK.S                                                                                                                                                                                 | Y601                                                                     | 1293.78                                                                                                               | 0.22                                                                                 | 0.1060 R.FLY@YEMGYK.S                                                                                                                                                                                                                                                                                       |
| Glucose-6-phosphate 1-dehydrogenase X                     | Q00612 | R.NSYVAGQY@DDAASYK.H<br>R.VQPNEAVY@TK.M<br>L.VIRVQPNEAVY@TKM#M<br>L.VIRVQPNEAVY@TKM.M<br><br>L.VIRVQPNEAVY@TKMM.T<br><br>K.KPGMFFNPEESELDTY@GNRYK.N<br>K.RVGFQYEGTY@K.W<br><br>R.VGFQYEGTY@K.W | Y111<br>Y400<br>Y400<br>Y400<br><br>Y400<br><br>Y423<br>Y506<br><br>Y506 | 1732.46<br>1229.40<br>1745.04<br>1728.63<br>1728.53<br>1860.52<br>1859.37<br>2716.37<br>1428.28<br>1428.11<br>1273.00 | 0.74<br>0.81<br>1.15<br>0.73<br>0.64<br>0.59<br>0.44<br>1.11<br>0.61<br>0.44<br>1.43 | none<br>0.0551 R.VQPNEAVY@TK.M<br>0.0798 L.VIRVQPNEAVY@TKM#M<br>0.0690 L.VIRVQPNEAVY@TKM.M<br>0.0903 L.VIRVQPNEAVY@TKM.M<br>0.0481 L.VIRVQPNEAVY@TKMM.T<br>0.1131 L.VIRVQPNEAVY@TKMM.T<br>0.0442 K.KPGMFFNPEESELDTY@GNRYK.N<br>0.0364 K.RVGFQYEGTY@K.W<br>0.1714 K.RVGFQYEGTY@K.W<br>0.0784 R.VGFQYEGTY@K.W |
| Inosine-5'-monophosphate dehydrogenase 2                  | P24547 | L.AATTEAPGEY@FFSDGIRL.K                                                                                                                                                                        | Y400                                                                     | 2025.93                                                                                                               | 0.99                                                                                 | none                                                                                                                                                                                                                                                                                                        |
| Phosphoglucomutase 2                                      | Q5RJV4 | K.IALY@ETPTGWK.F                                                                                                                                                                               | Y353                                                                     | 1359.54                                                                                                               | 0.87                                                                                 | none                                                                                                                                                                                                                                                                                                        |
| Ribonucleoside-diphosphate reductase large subunit        | P07742 | K.KVFSVDMEDLY@NYINPHNGR.H<br>K.KVFSVDM#EDLY@NYINPHNGR.H                                                                                                                                        | Y102<br>Y102                                                             | 2492.68<br>2508.75                                                                                                    | 1.54<br>1.61                                                                         | 0.1362 K.KVFSVDMEDLY@NYINPHNGR.H<br>0.0611 K.KVFSVDM#EDLY@NYINPHNGR.H                                                                                                                                                                                                                                       |
| Serine hydroxymethyltransferase, cytosolic                | P50431 | K.M#LSQPLKSDAEVY@SIKK.E<br>K.MLSQPLKSDAEVY@SIKK.E                                                                                                                                              | Y28<br>Y28                                                               | 2261.90<br>2246.63                                                                                                    | 0.75<br>1.48                                                                         | 0.0858 K.M#LSQPLKSDAEVY@SIKK.E<br>0.0409 K.MLSQPLKSDAEVY@SIKK.E                                                                                                                                                                                                                                             |
| S-adenosylhomocysteine hydrolase                          | Q5M9P0 | K.SKFDNLY@GC*R.E                                                                                                                                                                               | Y193                                                                     | 1340.32                                                                                                               | 0.76                                                                                 | none                                                                                                                                                                                                                                                                                                        |
| Thioredoxin reductase 1, cytoplasmic                      | Q9JMH6 | K.KVYENAY@GR.F<br><br>K.VVYENAY@GR.F                                                                                                                                                           | Y131<br><br>Y131                                                         | 1279.76<br>1279.41<br>1150.68                                                                                         | 1.14<br>0.79<br>0.15                                                                 | none<br>none<br>none                                                                                                                                                                                                                                                                                        |
| Thioredoxin reductase 1 [fragment]                        | Q3UEB7 | K.EVVYENAY@GR.F                                                                                                                                                                                | Y131                                                                     | 1280.86                                                                                                               | 1.29                                                                                 | none                                                                                                                                                                                                                                                                                                        |
| TK: Transketolase                                         | P40142 | K.NM#AEQIIQEY@SQVQSK.K<br>K.NMAEQIIQEY@SQVQSK.K                                                                                                                                                | Y275<br>Y275                                                             | 2106.94<br>2091.27<br>2090.21                                                                                         | 1.94<br>2.27<br>1.21                                                                 | 0.1420 K.NM#AEQIIQEY@SQVQSK.K<br>0.1295 K.NMAEQIIQEY@SQVQSK.K<br>0.1119 K.NMAEQIIQEY@SQVQSK.K                                                                                                                                                                                                               |
| UDP-glucose 6-dehydrogenase                               | Q70475 | R.INAWNSPTLPIY@EPGLK.E<br>R.INAWNSPTLPIY@EPGLKEVVESC*R.G                                                                                                                                       | Y53<br>Y53                                                               | 1993.78<br>2853.36                                                                                                    | 0.76<br>0.98                                                                         | 0.1794 R.INAWNSPT@LPIYEPGLK.E<br>0.1570 R.INAWNSPT@LPIYEPGLKEVVESC*R.G                                                                                                                                                                                                                                      |
| <b>RNA SYNTHESIS AND PROCESSING</b>                       |        |                                                                                                                                                                                                |                                                                          |                                                                                                                       |                                                                                      |                                                                                                                                                                                                                                                                                                             |
| <b>Transcription machinery and regulation</b>             |        |                                                                                                                                                                                                |                                                                          |                                                                                                                       |                                                                                      |                                                                                                                                                                                                                                                                                                             |
| CCR4-NOT transcription complex subunit 2                  | Q8C5L3 | F.VEGVDSYHDENM#Y@Y.S<br>F.VEGVDSYHDENMY@Y.S<br>K.FVEGVDSYHDENM#Y@YSQSSMFPHR.S<br>K.FVEGVDSYHDENMY@YSQSSM#FPHR.S<br>K.FVEGVDSYHDENMY@YSQSSMFPHR.S                                               | Y43<br>Y43<br>Y43<br>Y43<br>Y43                                          | 1932.21<br>1916.61<br>3137.60<br>3137.55<br>3120.79                                                                   | 0.50<br>0.90<br>1.35<br>1.30<br>0.54                                                 | 0.0044 F.VEGVDSYHDENM#Y@Y.S<br>0.0073 F.VEGVDSYHDENMY@Y.S<br>0.1041 K.FVEGVDSYHDENM#Y@YSQSSMFPHR.S<br>0.1199 K.FVEGVDSYHDENMY@YSQSSM#FPHR.S<br>0.0836 K.FVEGVDSYHDENMY@YSQSSMFPHR.S                                                                                                                         |
| DNA-directed RNA polymerase I 40 kDa polypeptide -- RPA40 | P52432 | R.NVHTTDFPGNY@AGYDDAWDQNRFEK.N                                                                                                                                                                 | Y33                                                                      | 3041.75                                                                                                               | 1.46                                                                                 | 0.1220 R.NVHTTDFPGNY@AGYDDAWDQNRFEK.N                                                                                                                                                                                                                                                                       |
| LIM domains containing protein 1 -- LIMD1                 | Q9QXD8 | K.VFC*EEDFLY@SGFQQSADR.C                                                                                                                                                                       | Y519                                                                     | 2278.51<br>2278.78                                                                                                    | 0.58<br>0.85                                                                         | 0.1106 K.VFC*EEDFLY@SGFQQSADR.C<br>0.0923 K.VFC*EEDFLY@SGFQQSADR.C                                                                                                                                                                                                                                          |
| NF-kappa-B DNA binding subunit p105                       | P25799 | F.TRRLEPVVSDAIY@DSKAPNASNL.K<br>R.RLEPVVSDAIY@DSKAPNASNL.I                                                                                                                                     | Y238<br>Y238                                                             | 2597.89<br>2468.36                                                                                                    | 1.58<br>1.10                                                                         | 0.1017 F.TRRLEPVVSDAIY@DSKAPNASNL.K<br>0.1473 R.RLEPVVSDAIY@DSKAPNASNL.I                                                                                                                                                                                                                                    |
| Polymerase I and transcript release factor -- PTRF        | O54724 | F.KVMYI@QDEVKLPACL.S<br>K.VMIY@QDEVKLPACL.L<br>R.KSFTPDHVVY@AR.S<br>K.SFTPDHVVY@AR.S                                                                                                           | Y158<br>Y158<br>Y310<br>Y310                                             | 1856.46<br>1614.53<br>1501.01<br>1371.90                                                                              | 1.45<br>0.70<br>1.27<br>0.25                                                         | none<br>none<br>none<br>none                                                                                                                                                                                                                                                                                |
| Staphylococcal nuclease domain-containing protein 1       | Q78PY7 | R.ADDADEFGY@SR.-                                                                                                                                                                               | Y908                                                                     | 1326.82                                                                                                               | 1.32                                                                                 | 0.1384 R.ADDADEFGYS@R.-                                                                                                                                                                                                                                                                                     |

|                                                                    |        |                                                                                                                                                                                                                                                                                                                                                                                                                    |                                                                                                                                   |                                                                                                                                                                                                                      |                                                                                                                                                              |                                                                                                                                                                                                                                                                                                                                                |
|--------------------------------------------------------------------|--------|--------------------------------------------------------------------------------------------------------------------------------------------------------------------------------------------------------------------------------------------------------------------------------------------------------------------------------------------------------------------------------------------------------------------|-----------------------------------------------------------------------------------------------------------------------------------|----------------------------------------------------------------------------------------------------------------------------------------------------------------------------------------------------------------------|--------------------------------------------------------------------------------------------------------------------------------------------------------------|------------------------------------------------------------------------------------------------------------------------------------------------------------------------------------------------------------------------------------------------------------------------------------------------------------------------------------------------|
|                                                                    |        | R.YGDFRADADEFY@SR.-                                                                                                                                                                                                                                                                                                                                                                                                | Y908                                                                                                                              | 1965.34                                                                                                                                                                                                              | 1.56                                                                                                                                                         | 0.0838 R.YGDFRADADEFY@R.-                                                                                                                                                                                                                                                                                                                      |
| Transcription initiation factor IIE alpha subunit                  | Q9D0D5 | R.FNEQIEPIY@ALLR.E                                                                                                                                                                                                                                                                                                                                                                                                 | Y188                                                                                                                              | 1686.85                                                                                                                                                                                                              | 0.99                                                                                                                                                         | none                                                                                                                                                                                                                                                                                                                                           |
| Transcription elongation factor SPT6                               | Q62383 | K.AAEDDELEEEADWIY@R.N                                                                                                                                                                                                                                                                                                                                                                                              | Y321                                                                                                                              | 2033.99                                                                                                                                                                                                              | 0.15                                                                                                                                                         | none                                                                                                                                                                                                                                                                                                                                           |
| Tripartite motif protein 25                                        | Q61510 | K.FDTIY@QVLVK.K<br>R.VYGKFDTIY@QVLVK.K                                                                                                                                                                                                                                                                                                                                                                             | Y277<br>Y277                                                                                                                      | 1306.61<br>1755.35<br>1753.14                                                                                                                                                                                        | 0.93<br>2.42<br>0.21                                                                                                                                         | none<br>none<br>0.1319 R.VYGKFDI@IYQVLVK.K                                                                                                                                                                                                                                                                                                     |
| <b>DEAD(DEAH)-box helicases</b>                                    |        |                                                                                                                                                                                                                                                                                                                                                                                                                    |                                                                                                                                   |                                                                                                                                                                                                                      |                                                                                                                                                              |                                                                                                                                                                                                                                                                                                                                                |
| ATP-dependent RNA helicase DDX3X (DDX3Y) (PL10)                    | Q62167 | K.GFY@DKDSSGWSS@SKDKDAYSSFGSR.G<br><br>K.DKDAY@SSFGSR.D<br>W.SSSKDKDAY@SSF.G<br>R.FDDRGRGDY@DGIGGR.G<br>R.GDY@DGIGGR.G<br>R.GDY@DGIGGRGDR.S<br>R.GRGDY@DGIGGR.G<br><br>R.GRGDY@DGIGGRGDR.S<br>K.TAAFLPILSIQIY@ADGPGEALR.A<br><br>L.VLAPTRRELAVQIY@EEARKF.S<br>R.VRPC*VVY@GGAIEGQQIR.D<br>F.VETKKGADSLDFLY@HEGY.A<br><br>K.GADSLDFLY@HEGYAC*TSIHGDR.S<br>K.KGADSLDFLY@HEGYAC*TSIHGDR.S<br>L.VFVETKKGADSLDFLY@HEGY.A | Y52<br><br>Y68<br>Y68<br>Y103<br>Y103<br>Y103<br>Y103<br><br>Y103<br>Y242<br><br>Y282<br>Y300<br>Y461<br><br>Y461<br>Y461<br>Y461 | 2925.64<br><br>1313.01<br>1402.42<br>1738.12<br>989.61<br>1318.29<br>1203.18<br>1203.80<br>1531.84<br>2397.50<br>2398.00<br><br>2315.54<br>1983.25<br>2282.58<br>2281.83<br>2694.29<br>2823.23<br>2528.99<br>2528.63 | 1.43<br><br>0.46<br>0.83<br>2.37<br>0.20<br>0.73<br>0.65<br>1.27<br>1.16<br>1.24<br>1.74<br><br>2.31<br>1.27<br>1.54<br>0.79<br>1.18<br>2.03<br>1.81<br>1.45 | 0.1009 K.GFY@DKDSSGWS@SSKDKDAYSSFGSR.G<br><br>0.0944 K.DKDAY@SFGSR.D<br>0.1348 W.SSSKDKDAY@SF.G<br><br>none<br>none<br>none<br>none<br>none<br>none<br>none<br>none<br>none<br>none<br><br>0.1563 F.VETKKGADSLDFLYHEGY@A<br>none<br>0.1667 K.KGADSLDFLYHEGY@AC*TSIHGDR.S<br>0.1241 L.VFVETKKGADSLDFLYHEGY@A<br>0.0826 L.VFVETKKGADSLDFLYHEGY@A |
| Putative ATP-dependent RNA helicase DHX30                          | Q99PU8 | R.ENYLEENLY@APSLR.F                                                                                                                                                                                                                                                                                                                                                                                                | Y991                                                                                                                              | 1904.76                                                                                                                                                                                                              | 0.84                                                                                                                                                         | none                                                                                                                                                                                                                                                                                                                                           |
| Probable ATP-dependent RNA helicase DDX6                           | P54823 | K.GVTQY@YAYVTER.Q                                                                                                                                                                                                                                                                                                                                                                                                  | Y312                                                                                                                              | 1531.35                                                                                                                                                                                                              | 1.65                                                                                                                                                         | 0.1139 K.GVT@QYAYVTER.Q                                                                                                                                                                                                                                                                                                                        |
| Putative pre-mRNA splicing factor ATP-dependent RNA helicase DHX15 | Q35286 | K.QNHESVQWC*Y@DNFINYR.S                                                                                                                                                                                                                                                                                                                                                                                            | Y645                                                                                                                              | 2354.91                                                                                                                                                                                                              | 1.95                                                                                                                                                         | none                                                                                                                                                                                                                                                                                                                                           |
| Probable ATP-dependent RNA helicase DDX17 (DDX5)                   | Q501J6 | K.STC*Y@GGAPK.G<br>R.LKSTC*Y@GGAPK.G                                                                                                                                                                                                                                                                                                                                                                               | Y200<br>Y200                                                                                                                      | 1133.66<br>1376.84                                                                                                                                                                                                   | 0.18<br>2.18                                                                                                                                                 | none<br>0.0842 R.LKST@C*YGGAPK.G                                                                                                                                                                                                                                                                                                               |
| Probable ATP-dependent RNA helicase DDX20 -- DEAD-box protein 20   | Q9JJY4 | R.VQSEPQEEWY@DC*HR.E<br>R.AWQEY@YAAASHSYWNAQR.H                                                                                                                                                                                                                                                                                                                                                                    | Y757<br>Y788                                                                                                                      | 2030.07<br>2445.45                                                                                                                                                                                                   | 0.28<br>0.41                                                                                                                                                 | 0.0515 R.VQSEPQEE@WYDC*HR.E<br>0.0745 R.AWQEY@AAASHSYWNAQR.H                                                                                                                                                                                                                                                                                   |
| Probable ATP-dependent helicase DDX48                              | Q91VC3 | K.GFKEQIY@DVYR.Y                                                                                                                                                                                                                                                                                                                                                                                                   | Y202                                                                                                                              | 1499.04<br>1498.44                                                                                                                                                                                                   | 1.33<br>0.73                                                                                                                                                 | none<br>none                                                                                                                                                                                                                                                                                                                                   |
| <b>hnRNPs and snRNPs</b>                                           |        |                                                                                                                                                                                                                                                                                                                                                                                                                    |                                                                                                                                   |                                                                                                                                                                                                                      |                                                                                                                                                              |                                                                                                                                                                                                                                                                                                                                                |
| Heterogeneous nuclear ribonucleoprotein A1                         | P49312 | F.GGRSSGPY@GGGGQY.F<br>R.SSGPYGGGGQY@FAKPR.N                                                                                                                                                                                                                                                                                                                                                                       | Y288<br>Y294                                                                                                                      | 1526.42<br>1708.75                                                                                                                                                                                                   | -0.22<br>-0.03                                                                                                                                               | none<br>none                                                                                                                                                                                                                                                                                                                                   |
| Heterogeneous nuclear ribonucleoprotein A3                         | Q8BG05 | Y.GGGYGSGGGSGGY@GSRRF.-                                                                                                                                                                                                                                                                                                                                                                                            | Y374                                                                                                                              | 1718.16                                                                                                                                                                                                              | 2.43                                                                                                                                                         | 0.0301 Y.GGGYGSGGGSGGY@RRF.-                                                                                                                                                                                                                                                                                                                   |
| Heterogeneous nuclear ribonucleoprotein A/B                        | Q3TMZ8 | Y.GPGYGGYDYSY@GYY.G<br>Y.GYQQGYGPGYGGYDY@SPYGY.G                                                                                                                                                                                                                                                                                                                                                                   | Y291<br>Y288                                                                                                                      | 1759.36<br>2456.33                                                                                                                                                                                                   | 0.69<br>1.36                                                                                                                                                 | none<br>none                                                                                                                                                                                                                                                                                                                                   |
| Heterogeneous nuclear ribonucleoprotein F                          | Q9Z2X1 | K.ATENDIY@NFFSPLNPVR.V<br><br>R.DLSYC*LSGMY@DHR.Y                                                                                                                                                                                                                                                                                                                                                                  | Y306<br><br>Y272                                                                                                                  | 2077.60<br>2077.75<br>1698.59                                                                                                                                                                                        | 0.61<br>0.76<br>1.93                                                                                                                                         | 0.1897 K.AT@ENDIYNFFSPLNPVR.V<br>0.1895 K.AT@ENDIYNFFSPLNPVR.V<br>0.1833 R.DLSYC*LS@GMYDHR.Y                                                                                                                                                                                                                                                   |
| Heterogeneous nuclear ribonucleoprotein H1                         | Q811L7 | R.GAYGGYGGY@DDYNGYNDGYGFGSDRFGR.D<br>R.GAYGGYGGYDDY@NGYNDGYGFGSDRFGR.D<br>R.RGAYGGYGGYDDY@NGYNDGYGFGSDR.F<br>R.RGAYGGYGGYDDY@NGYNDGYGFGSDRFGR.D<br><br>R.GAYGGYGGYDDY@NGYNDGYGFGSDRFGR.D                                                                                                                                                                                                                           | Y243<br>Y246<br>Y246<br>Y246<br><br>Y249                                                                                          | 3157.52<br>3159.41<br>2954.06<br>3314.92<br><br>3157.92                                                                                                                                                              | 0.28<br>2.17<br>0.91<br>1.89<br><br>0.68                                                                                                                     | 0.0374 R.GAYGGYGGYDDY@NGYNDGYGFGSDRFGR.D<br>0.0285 R.GAYGGYGGY@DDYNGYNDGYGFGSDRFGR.D<br>0.0365 R.RGAYGGYGGY@DDYNGYNDGYGFGSDR.F<br>0.0274 R.RGAYGGYGGY@DDYNGYNDGYGFGSDRFGR.D<br>0.0333 R.GAYGGYGGY@DDYNGYNDGYGFGSDRFGR.D                                                                                                                        |
| Heterogeneous nuclear ribonucleoprotein H'                         | P70333 | R.GAYGGYGGY@DDYGGYNDGYGFGSDRFGR.D<br>R.GAYGGYGGYDDY@GGYNDGYGFGSDRFGR.D<br>R.RGAYGGYGGYDDY@GGYNDGYGFGSDR.F<br>R.RGAYGGYGGYDDY@GGYNDGYGFGSDRFGR.D<br><br>Y.GGGYGGYDDY@GGYNDGYGFGSDRFGR.D<br>Y.GGGYGGYDDY@GGYNDGYGFGSDRFGR.D<br>R.ATENDIY@NFFSPLNPMR.V<br>Y.RATENDIY@NFFS                                                                                                                                             | Y243<br>Y246<br>Y246<br>Y246<br><br>Y246<br>Y246<br>Y306<br>Y306                                                                  | 3100.80<br>3101.06<br>2896.60<br><br>3256.76<br>2034.33<br>2596.25<br>2109.47<br>1470.32                                                                                                                             | 0.59<br>0.85<br>0.48<br><br>1.14<br>0.61<br>0.28<br>0.52<br>0.68                                                                                             | 0.0469 R.GAYGGYGGYDDY@GGYNDGYGFGSDRFGR.D<br>0.1258 R.GAYGGYGGYDDYGGY@NDGYGFGSDRFGR.D<br>0.1462 R.RGAYGGYGGY@DDYGGYNDGYGFGSDR.F<br><br>0.1400 R.RGAYGGYGGYDDYGGY@NDGYGFGSDRFGR.D<br>0.1927 Y.GGGYGGY@DDYGGYNDGYGFGSDRFGR.D<br>0.1144 Y.GGGYGGYDDYGGY@NDGYGFGSDRFGR.D<br>0.1990 R.AT@ENDIYNFFSPLNPMR.V<br>none                                   |
| Heterogeneous nuclear ribonucleoprotein L                          | Q8R081 | M.VKMAAAGGGGGGGRY@Y.G                                                                                                                                                                                                                                                                                                                                                                                              | Y16                                                                                                                               | 1553.17                                                                                                                                                                                                              | 1.46                                                                                                                                                         | 0.0236 M.VKMAAAGGGGGGGRY@G                                                                                                                                                                                                                                                                                                                     |



|                                                                 |        |                                                                                                                                                                                                  |                                                        |                                                                                                 |                                                                      |                                                                                                                                                                                                                                                                                                          |
|-----------------------------------------------------------------|--------|--------------------------------------------------------------------------------------------------------------------------------------------------------------------------------------------------|--------------------------------------------------------|-------------------------------------------------------------------------------------------------|----------------------------------------------------------------------|----------------------------------------------------------------------------------------------------------------------------------------------------------------------------------------------------------------------------------------------------------------------------------------------------------|
| Heterogeneous nuclear ribonucleoprotein M                       | Q9D0E1 | N.RFEPY@SNPTKRY.R                                                                                                                                                                                | Y62                                                    | 1638.31                                                                                         | 0.53                                                                 | 0.0622 N.RFEPYS@NPTKRY.R                                                                                                                                                                                                                                                                                 |
| Heterogeneous nuclear ribonucleoprotein Q                       | Q7TMK9 | Q.RQAAKNQMYDDYY@YY.G<br>R.GGYEDPY@YGYEDFQVGAR.G<br>Y.RGGYEDPY@YGY@EDFQVGAR.G<br>Y.RGGYEDPY@YGY@EDF.Q<br>Y.RGGYEDPY@YGYEDF.Q<br>Y.RGGYEDPY@YGYEDF.Q                                               | Y432<br>Y485<br>Y485,Y488<br>Y485,Y488<br>Y485<br>Y485 | 2072.98<br>2166.94<br>2401.92<br>1892.33<br>1812.07<br>1939.52                                  | 1.12<br>1.06<br>-0.07<br>1.63<br>1.37<br>0.76                        | 0.0285 Q.RQAAKNQMYDDYY@YY.G<br>0.0889 R.GGYEDPY@YGYEDFQVGAR.G<br>0.1253 Y.RGGYEDPY@YGY@EDFQVGAR.G<br>0.0998 Y.RGGYEDPY@YGYEDF.Q<br>0.0700 Y.RGGYEDPY@YGYEDF.Q<br>0.0449 Y.RGGYEDPY@YGYEDF.Q                                                                                                              |
| Heterogeneous nuclear ribonucleoprotein R                       | Q8VHM5 | Y.RGGYEDPY@YGYDDGY.A                                                                                                                                                                             | Y489                                                   | 1870.15                                                                                         | 0.45                                                                 | 0.1472 Y.RGGYEDPY@YGYDDGY.A                                                                                                                                                                                                                                                                              |
| Heterogeneous nuclear ribonucleoprotein U                       | O88568 | K.NQSQGYNQWQQGFQWQKPSQHYHQGY@Y.-                                                                                                                                                                 | Y797                                                   | 3740.91                                                                                         | 2.30                                                                 | none                                                                                                                                                                                                                                                                                                     |
| Polypyrimidine tract binding protein                            | Q8R509 | Y.TSVAPVLRGQPNY@IQF.S                                                                                                                                                                            | Y126                                                   | 1871.74                                                                                         | 1.78                                                                 | none                                                                                                                                                                                                                                                                                                     |
| Polypyrimidine tract-binding protein 1 -- hnRNP                 | P17225 | R.GQPIY@IQFSNHK.E<br>Y.TSVAPVLRGQPIY@IQF.S                                                                                                                                                       | Y126<br>Y126                                           | 1511.57<br>1870.66                                                                              | -0.17<br>1.66                                                        | none<br>none                                                                                                                                                                                                                                                                                             |
| U1 small nuclear ribonucleoprotein 70 kDa                       | Q62376 | K.HHNQPY@C*GIAPYR.E                                                                                                                                                                              | Y38                                                    | 1806.75                                                                                         | 0.94                                                                 | none                                                                                                                                                                                                                                                                                                     |
| U1 small nuclear ribonucleoprotein C                            | Q62241 | K.FYC*DYC*DTY@LTHDSPSVR.K                                                                                                                                                                        | Y12                                                    | 2380.07                                                                                         | 1.17                                                                 | 0.0584 K.FYC*DYC*DTY@LTHDSPSVR.K                                                                                                                                                                                                                                                                         |
| <b>Splicing factors</b>                                         |        |                                                                                                                                                                                                  |                                                        |                                                                                                 |                                                                      |                                                                                                                                                                                                                                                                                                          |
| Apoptosis-related RNA binding protein                           | Q9Z0H4 | K.ELFEPYGAIV@QINVL.R.D                                                                                                                                                                           | Y67                                                    | 1991.96                                                                                         | 0.96                                                                 | none                                                                                                                                                                                                                                                                                                     |
| Crooked neck-like protein 1                                     | P63154 | R.KVQADDGSDAGWEEY@YDYIFPEDAANQPNL.K<br>R.KVQADDGSDAGWEEY@YDYIFPEDAANQPNL.L<br>R.KVQADDGSDAGWEEY@YDYIFPEDAANQPNL.L<br>R.KVQADDGSDAGWEEY@YDYIFPEDAANQPNL.L<br>R.RKVQADDGSDAGWEEY@YDYIFPEDAANQPNL.L | Y640,Y641<br>Y640<br>Y641<br>Y641                      | 3709.15<br>3630.34<br>3629.24<br>3785.88                                                        | 0.57<br>1.76<br>0.66<br>1.20                                         | 0.0753 R.KVQADDGSDAGWEEY@YDYIFPEDAANQPNL.L<br>0.0014 R.KVQADDGSDAGWEEY@YDYIFPEDAANQPNL.L<br>0.0544 R.KVQADDGSDAGWEEY@YDYIFPEDAANQPNL.L<br>0.0535 R.RKVQADDGSDAGWEEY@YDYIFPEDAANQPNL.L                                                                                                                    |
| RNA binding motif, single-stranded interacting protein 1        | Q91W59 | K.QQMYPQY@ATYYPQYLQAK.Q<br>W.KQMYPQY@ATY.Y<br>K.QQMYPQY@ATY@YYPQYLQAK.Q<br>K.QQM#YYPQYATY@YYPQYLQAK.Q<br>K.QQMYPQYATY@YYPQYLQAK.Q<br>L.HNGFYSPSY@SIATN.R                                         | Y13<br>Y13<br>Y13,Y16<br>Y16<br>Y16<br>Y272            | 2528.18<br>2527.81<br>1501.93<br>2608.71<br>2544.16<br>2545.02<br>2529.11<br>2528.00<br>1648.43 | 1.04<br>0.67<br>1.27<br>1.57<br>1.02<br>1.88<br>1.97<br>0.86<br>0.71 | 0.0658 K.QQMYPQYAT@YYPQYLQAK.Q<br>0.1028 K.QQMYPQYAT@YYPQYLQAK.Q<br>0.1365 W.KQMYPQY@ATY.Y<br>0.0433 K.QQMYPQY@AT@YYPQYLQAK.Q<br>0.0094 K.QQM#YYPQYATY@YYPQYLQAK.Q<br>0.0237 K.QQM#YYPQYAT@YYPQYLQAK.Q<br>0.0147 K.QQMYPQYAT@YYPQYLQAK.Q<br>0.0157 K.QQMYPQYAT@YYPQYLQAK.Q<br>0.1024 L.HNGFYSPSY@SIATN.R |
| Splicing factor, arginine/serine-rich 1                         | Q6PDM2 | F.VRKEDMTY@AVR.K                                                                                                                                                                                 | Y169                                                   | 1448.14                                                                                         | 0.43                                                                 | 0.1135 F.VRKEDMTY@AVR.K                                                                                                                                                                                                                                                                                  |
| Splicing factor, arginine/serine-rich 3                         | P84104 | R.AFGY@YGPLR.S                                                                                                                                                                                   | Y32                                                    | 1124.17                                                                                         | 0.64                                                                 | 0.1722 R.AFGY@GPLR.S                                                                                                                                                                                                                                                                                     |
| Splicing factor 3b, subunit 4                                   | Q8QZY9 | F.IGNLDPEIDEKLLY@DTF.S                                                                                                                                                                           | Y117                                                   | 2075.45                                                                                         | 0.45                                                                 | 0.1569 F.IGNLDPEIDEKLLYDT@F.S                                                                                                                                                                                                                                                                            |
| Splicing factor, arginine/serine-rich 5                         | O35326 | F.GFVFEFEDPRDADDVY@ELDGKEL.C<br>R.GFGVFEFEDPRDADDVY@ELDGK.E<br>R.GFGVFEFEDPRDADDVY@ELDGKEL*SER.V                                                                                                 | Y55<br>Y55<br>Y55                                      | 2711.02<br>2710.83<br>2673.41<br>3447.57                                                        | 1.83<br>1.64<br>2.25<br>2.10                                         | none<br>none<br>none<br>none                                                                                                                                                                                                                                                                             |
| Arginine/serine-rich splicing factor 6                          | Q921K3 | K.NGYGFVEFEDSRDADDVY@ELNSK.E<br>Y.GFVFEFEDSRDADDVY@ELNSKEL.C                                                                                                                                     | Y53<br>Y53                                             | 2821.59<br>2730.50                                                                              | 1.39<br>2.30                                                         | 0.1583 K.NGYGFVEFEDSRDADDVYELNS@K.E<br>none                                                                                                                                                                                                                                                              |
| Splicing factor, arginine/serine-rich 9                         | Q9D0B0 | R.DAEDAIY@GR.N                                                                                                                                                                                   | Y71                                                    | 1090.19                                                                                         | 0.73                                                                 | none                                                                                                                                                                                                                                                                                                     |
| Splicing factor, proline- and glutamine-rich                    | Q8VIJ6 | R.FAQHGTFEY@EYSQR.W                                                                                                                                                                              | Y480                                                   | 1842.64                                                                                         | -0.14                                                                | none                                                                                                                                                                                                                                                                                                     |
| <b>Other RNA binding and processing</b>                         |        |                                                                                                                                                                                                  |                                                        |                                                                                                 |                                                                      |                                                                                                                                                                                                                                                                                                          |
| DAZ-associated protein 1                                        | Q9JII5 | L.AFPPPPSQAAPDMSKPTAQPDFPY@GQY.G                                                                                                                                                                 | Y346                                                   | 3084.01                                                                                         | 1.61                                                                 | 0.1810 L.AFPPPPSQAAPDMSKPTAQPDFPYGQY@G                                                                                                                                                                                                                                                                   |
| Double-stranded RNA-binding protein Staufen homolog             | Q9Z108 | R.ELLY@GGSPTAETILK.S<br>R.TRPSEQLY@YLSR.A                                                                                                                                                        | Y371<br>Y404                                           | 1772.86<br>1593.68<br>1593.49                                                                   | -0.05<br>0.90<br>0.70                                                | none<br>0.1324 R.TRPSEQLY@YLSR.A<br>0.0605 R.TRPSEQLY@YLSR.A                                                                                                                                                                                                                                             |
| ELAV-like protein 1                                             | P70372 | K.NMALLSQLY@HSPAR.R                                                                                                                                                                              | Y200                                                   | 1681.12<br>1681.83                                                                              | 0.29<br>1.00                                                         | 0.0766 K.NMALLSQLYHS@PAR.R<br>0.0995 K.NMALLSQLYHS@PAR.R                                                                                                                                                                                                                                                 |
| ELAV-like protein 2                                             | Q60899 | K.TNQAILSQLY@QSPNR.R                                                                                                                                                                             | Y219                                                   | 1814.48                                                                                         | 1.58                                                                 | none                                                                                                                                                                                                                                                                                                     |
| Fragile X mental retardation syndrome related protein 1 homolog | Q61584 | K.EISEGDEVEVY@SR.A<br>K.EISEGDEVEVY@SR.A<br>L.KDPDSNPY@SLL.D                                                                                                                                     | Y68<br>Y68<br>Y506                                     | 1594.00<br>1720.41<br>1720.51<br>1329.29                                                        | 2.31<br>0.63<br>0.73<br>0.68                                         | none<br>0.0952 K.EISEGDEVEVYS@R.A<br>0.0539 K.EISEGDEVEVYS@R.A<br>0.1248 L.KDPDSNPYS@LL.D                                                                                                                                                                                                                |

|                                                                 |               |                                                                                                                                                                                             |                                                       |                                                                           |                                                      |                                                                                                                                                                                                         |
|-----------------------------------------------------------------|---------------|---------------------------------------------------------------------------------------------------------------------------------------------------------------------------------------------|-------------------------------------------------------|---------------------------------------------------------------------------|------------------------------------------------------|---------------------------------------------------------------------------------------------------------------------------------------------------------------------------------------------------------|
| Fragile X mental retardation syndrome related protein 2 homolog | Q9WVR4        | R.LPPPADYNKEITEGDEVEVY@SR.A<br>L.KDPDSNPY@SLDSTSEPEPPVDSEPEPPASAR.R                                                                                                                         | Y78<br>Y520                                           | 2602.73<br>3570.84                                                        | 1.52<br>0.23                                         | 0.0431 R.LPPPADYNKEITEGDEVEVYS@R.A<br>0.0459 L.KDPDSNPYS@LLDSTSEPEPPVDSEPEPPASAR.R                                                                                                                      |
| Insulin-like growth factor 2 mRNA-binding protein 2             | Q5SF07        | K.SGY@AFVDYDQNWAIK.A                                                                                                                                                                        | Y40                                                   | 1983.39                                                                   | 1.51                                                 | 0.0062 K.S@GYAFVDYDQNWAIK.A                                                                                                                                                                             |
| Insulin-like growth factor 2, binding protein 1                 | Q80US9        | K.SGY@AFVDC*PDEHWAMK.A                                                                                                                                                                      | Y39                                                   | 1994.13                                                                   | 1.35                                                 | 0.0899 K.S@GYAFVDC*PDEHWAMK.A                                                                                                                                                                           |
| Interleukin enhancer-binding factor 3                           | Q9Z1X4        | R.VLEC*LASGIVMPDGS@DPC*EKEATDAIGHLD.R.Q                                                                                                                                                     | Y292                                                  | 3770.36                                                                   | 1.67                                                 | 0.0452 R.VLEC*LASGIVMPDGS@GIYDPC*EKEATDAIGHLD.R.Q                                                                                                                                                       |
| Matrin-3                                                        | Q8K310        | R.SATREPPY@RVPR.D<br>R.SQESGYY@DRMDYEDDRLR.D                                                                                                                                                | Y171<br>Y214                                          | 1509.57<br>2379.59                                                        | 0.80<br>1.62                                         | none<br>0.0267 R.SQESGYY@YDRMDYEDDRLR.D                                                                                                                                                                 |
| Polyadenylate-binding protein 1 -- PABP1 (PABC4)                | P29341        | Y.VGDLHPDVTEAM#LY@EKF.S<br>Y.VGDLHPDVTEAMLY@EKF.S<br>K.ALY@DTFSAFGNILSC*K.V                                                                                                                 | Y28<br>Y28<br>Y116                                    | 2061.61<br>2044.23<br>1887.61                                             | 1.66<br>0.28<br>0.76                                 | none<br>none<br>0.1746 K.ALYDT@FSAFGNILSC*K.V                                                                                                                                                           |
| Poly(RC)-binding protein 2                                      | Q61990        | Y.TIQGQY@AIPQPDCLK.H<br>Y.TIQGQY@AIPQPDCLK.HQLAM#Q<br>Y.TIQGQY@AIPQPDCLK.HQLAM.Q                                                                                                            | Y232<br>Y232<br>Y232                                  | 1867.27<br>2464.22<br>2447.42<br>2446.44                                  | 1.30<br>1.97<br>1.17<br>0.19                         | none<br>none<br>none<br>0.1033 Y.T@IQGQY@AIPQPDCLK.HQLAM.Q                                                                                                                                              |
| Poly(RC)-binding protein 3                                      | P57722        | K.PASTPVIFAGGQAYTIQGQY@AIPHDLTK.L                                                                                                                                                           | Y201                                                  | 3123.08                                                                   | 1.51                                                 | none                                                                                                                                                                                                    |
| Protein SMG7                                                    | Q5RJH6        | K.VPEFYWDSY@SMADNR.A                                                                                                                                                                        | Y826                                                  | 2047.17                                                                   | 0.34                                                 | 0.0240 K.VPEFYWDS@SYSMADNR.A                                                                                                                                                                            |
| Pumilio homolog 1                                               | Q80U78        | R.SQDDAMVDY@FFQR.Q                                                                                                                                                                          | Y83                                                   | 1702.58                                                                   | 0.88                                                 | none                                                                                                                                                                                                    |
| Putative RNA-binding protein 3                                  | O89086        | R.YDSRPGGYGY@GYGR.S<br>R.YDSRPGGYGY@GR.S                                                                                                                                                    | Y124<br>Y126                                          | 1649.29<br>1648.32                                                        | 1.60<br>0.64                                         | 0.0718 R.YDSRPGGYGY@GR.S<br>0.1379 R.YDSRPGGYGY@GYGR.S                                                                                                                                                  |
| Ras-GTPase-activating protein binding protein 1 -- G3bp1        | P97855        | K.NSSYAHGGLDSNGKPADAVY@GQK.E                                                                                                                                                                | Y56                                                   | 2417.01                                                                   | 0.92                                                 | none                                                                                                                                                                                                    |
| Ras-GTPase-activating protein SH3-domain binding protein        | UPI0000D62F64 | K.NSSYAHGGLDSNGKPADAVY@GQK.E                                                                                                                                                                | Y56                                                   | 2418.61                                                                   | 2.48                                                 | none                                                                                                                                                                                                    |
| Ras-GTPase-activating protein binding protein 2                 | P97379        | R.NSSYVHGGVDASGKQAEVY@QNDIHHK.V<br>Y.VHGGVDASGKQAEVY@QNDIHHK.V                                                                                                                              | Y56<br>Y56                                            | 3075.79<br>2836.92                                                        | 1.38<br>1.53                                         | 0.1362 R.NSSYVHGGVDAS@GKQAEVY@QNDIHHK.V<br>none                                                                                                                                                         |
| Regulator of differentiation 1 -- Rod1                          | Q8BHD7        | R.SQPYY@IQYSNHR.E                                                                                                                                                                           | Y98                                                   | 1572.85                                                                   | 1.12                                                 | 0.1990 R.S@QPYY@IQYSNHR.E                                                                                                                                                                               |
| Regulator of nonsense transcripts 1 -- RENT1                    | Q9EPU0        | L.AELNFEDEEDTY@YTKDLPVHAC*.S.Y.C<br>L.AELNFEDEEDTY@YTKDLPVHAC*.S<br>L.LAELNFEDEEDTY@YTKDLPVHAC*.S<br>K.RFTAQGLPDLNHSQVY@AVK.T<br>R.FM#TTAMY@DAR.E<br>R.FMTTAMY@DAR.E<br>R.AYQHGGVTVGLS@QY.- | Y108<br>Y108<br>Y108<br>Y472<br>Y930<br>Y930<br>Y1113 | 3120.26<br>2870.34<br>2981.81<br>2224.55<br>1303.56<br>1288.28<br>1461.38 | 1.99<br>2.17<br>0.55<br>0.43<br>1.03<br>1.75<br>0.73 | 0.0028 L.AELNFEDEEDTY@YTKDLPVHAC*.S.Y.C<br>0.0424 L.AELNFEDEEDTY@YTKDLPVHAC*.S<br>0.0528 L.LAELNFEDEEDTY@YTKDLPVHAC*.S<br>0.1566 K.RFTAQGLPDLNHS@QVYAVK.T<br>none<br>none<br>0.1952 R.AYQHGGVTVGLS@QY.- |
| <b>PROTEIN SYNTHESIS AND PROCESSING</b>                         |               |                                                                                                                                                                                             |                                                       |                                                                           |                                                      |                                                                                                                                                                                                         |
| <b>tRNA synthetases</b>                                         |               |                                                                                                                                                                                             |                                                       |                                                                           |                                                      |                                                                                                                                                                                                         |
| Alanyl-tRNA synthetase                                          | Q8BGQ7        | K.DNFWEMGDTGPC*GPC*SEIHY@DR.I                                                                                                                                                               | Y192                                                  | 2724.93                                                                   | 1.94                                                 | 0.1390 K.DNFWEMGDTGPC*GPC*S@EIHVDR.I                                                                                                                                                                    |
| Arginyl-tRNA synthetase                                         | Q9D019        | K.SDGGYTY@DTSDLAAIK.Q                                                                                                                                                                       | Y384                                                  | 1757.13                                                                   | 0.37                                                 | 0.0596 K.SDGGYT@YDTSDLAAIK.Q                                                                                                                                                                            |
| Bifunctional aminoacyl-tRNA synthetase                          | Q8CGC7        | R.GFFIC*DQPYEPVSPY@SC*R.E<br>R.RGFFIC*DQPYEPVSPY@SC*R.E                                                                                                                                     | Y690<br>Y690                                          | 2303.26<br>2302.41<br>2459.14<br>2459.31                                  | 1.33<br>0.48<br>1.11<br>1.27                         | 0.0087 R.GFFIC*DQPYEPVSPY@SC*R.E<br>0.0973 R.GFFIC*DQPYEPVSPY@SC*R.E<br>0.0328 R.RGFFIC*DQPYEPVSPY@SC*R.E<br>0.0657 R.RGFFIC*DQPYEPVSPY@SC*R.E                                                          |
| Cysteinyl-tRNA synthetase                                       | Q9ER72        | K.VTWYC*C*GPTVY@DASHMGHAR.S                                                                                                                                                                 | Y143                                                  | 2449.20                                                                   | 1.24                                                 | 0.0731 K.VTWYC*C*GPTVYDAS@HMGHAR.S                                                                                                                                                                      |
| Histidyl-tRNA synthetase                                        | Q61035        | K.LIY@DLKDQGGELLSL.R.Y<br>K.YGEDSKLIY@DLKDQGGELLSL.R.Y<br>L.TGKYGEDSKLIY@DLKDQGGELLS                                                                                                        | Y115<br>Y115<br>Y115                                  | 1914.13<br>1914.11<br>2593.99<br>2523.44                                  | 1.12<br>1.10<br>1.70<br>1.20                         | none<br>none<br>none<br>none                                                                                                                                                                            |
| Isoleucine-tRNA synthetase                                      | Q6NXK4        | K.NNDLC*Y@WVPEFVR.E                                                                                                                                                                         | Y434                                                  | 1792.18                                                                   | 0.41                                                 | none                                                                                                                                                                                                    |
| Iysyl-tRNA synthetase                                           | Q8C292        | K.ITYHPDGPEGQAY@EVDFTPPFR.R<br>K.ITYHPDGPEGQAY@EVDFTPPFR.I                                                                                                                                  | Y381<br>Y381                                          | 2618.27<br>2773.74                                                        | 2.09<br>1.48                                         | none<br>none                                                                                                                                                                                            |
| Valyl-tRNA synthetase                                           | Q9Z1Q9        | R.LHEEGVIY@R.S                                                                                                                                                                              | Y468                                                  | 1196.22                                                                   | 0.64                                                 | none                                                                                                                                                                                                    |
| <b>Translation machinery</b>                                    |               |                                                                                                                                                                                             |                                                       |                                                                           |                                                      |                                                                                                                                                                                                         |



|                                                                                                                                 |               |                                                                                                                                                                                    |                                                  |                                                                                      |                                                               |                                                                                                                                                                                                                           |
|---------------------------------------------------------------------------------------------------------------------------------|---------------|------------------------------------------------------------------------------------------------------------------------------------------------------------------------------------|--------------------------------------------------|--------------------------------------------------------------------------------------|---------------------------------------------------------------|---------------------------------------------------------------------------------------------------------------------------------------------------------------------------------------------------------------------------|
| 40S ribosomal protein S10                                                                                                       | P63325        | R.IAIY@ELLFK.E                                                                                                                                                                     | Y12                                              | 1191.28                                                                              | 1.62                                                          | none                                                                                                                                                                                                                      |
| 60S ribosomal protein L3                                                                                                        | P27659        | K.NNASTDY@DLSDK.S                                                                                                                                                                  | Y306                                             | 1422.85                                                                              | 0.27                                                          | 0.1716 K.NNAST@DYDLSDK.S                                                                                                                                                                                                  |
| 60S ribosomal protein L4                                                                                                        | Q9D8E6        | R.KLDELY@GTWR.K                                                                                                                                                                    | Y264                                             | 1361.44                                                                              | 0.78                                                          | none                                                                                                                                                                                                                      |
| mitochondrial ribosomal protein S27                                                                                             | UPI00001C5303 | F.VDNIASREDLDSAIEY@LYK<br>R.FVDNIASREDLDSAIEY@LYK.F<br>R.EDLDSAIEY@LYK.F                                                                                                           | Y90<br>Y90<br>Y90                                | 2216.95<br>2492.48<br>1590.13                                                        | 0.97<br>1.34<br>1.45                                          | 0.1226 F.VDNIASREDLDSAIEY@LYK<br>0.0509 R.FVDNIASREDLDSAIEY@LYK.F<br>0.1150 R.EDLDSAIEY@LYK.F                                                                                                                             |
| Eukaryotic translation initiation factor 2A                                                                                     | Q640P8        | L.VIASTEVDKTGASY@YGEQTLH.Y<br>L.VIASTEVDKTGASY@YGEQTLHY.I<br>K.LISKPVASDSTY@FAWC*PDGEHILTATC*APR.L<br>K.PVASDSTY@FAWC*PDGEHILTATC*APR.L<br>L.ISKPVASDSTY@FA<br>Y.KLISKPVASDSTY@FA  | Y250<br>Y250<br>Y362<br>Y362<br>Y362<br>Y362     | 2349.94<br>2513.63<br>3445.11<br>3003.18<br>1395.07<br>1636.09                       | 0.84<br>1.47<br>1.54<br>0.89<br>0.41<br>0.25                  | 0.1589 L.VIASTEVDKTGAS@YGEQTLH.Y<br>0.0953 L.VIASTEVDKTGAS@YGEQTLHY.I<br>0.0135 K.LISKPVASDST@YFAWC*PDGEHILTATC*APR.L<br>0.0212 K.PVASDST@YFAWC*PDGEHILTATC*APR.L<br>0.1554 L.ISKPVASDST@YFA<br>0.0186 Y.KLISKPVASDST@YFA |
| Eukaryotic translation initiation factor 3 subunit 1                                                                            | Q66JS6        | L.KATM#KDDLADY@GGYEGGYVQDYEDFM#-<br>L.KATMKDDLADY@GGYEGGYVQDYEDFM#-<br>L.KATMKDDLADY@GGYEGGYVQDYEDFM#-                                                                             | Y248<br>Y248<br>Y248                             | 3094.72<br>3078.11<br>3061.03                                                        | 1.47<br>0.86<br>-0.22                                         | 0.1430 L.KATM#KDDLADYGGYEGGYVQDYEDFM#-<br>0.1523 L.KATMKDDLADYGGY@GGYEGGYVQDYEDFM#-<br>none                                                                                                                               |
| Eukaryotic translation initiation factor 3, subunit 7                                                                           | O70194        | R.NLAMEATY@INHNSQQC*LR.M                                                                                                                                                           | Y317                                             | 2391.75                                                                              | 1.69                                                          | 0.0479 R.NLAMEAT@YINHNSQQC*LR.M                                                                                                                                                                                           |
| Eukaryotic translation initiation factor 3, subunit 8                                                                           | Q8R1B4        | F.DHKQGT@GGY.F<br>F.DHKQGT@GGY.F<br>L.GSLVENNERVFDHKQGT@GGY.F<br>R.VFDHKQGT@GGY.F                                                                                                  | Y879<br>Y879<br>Y879<br>Y879                     | 1205.78<br>1353.00<br>2451.21<br>1754.36                                             | 0.28<br>0.44<br>1.09<br>-0.44                                 | 0.1391 F.DHKQGT@GGY.F<br>0.0580 F.DHKQGT@GGY.F<br>0.0391 L.GSLVENNERVFDHKQGT@GGY.F<br>0.0405 R.VFDHKQGT@GGY.F                                                                                                             |
| Eukaryotic translation initiation factor 3, subunit 9                                                                           | Q8JZQ9        | R.MTLDTLSIY@ETPSMGLLDKK.S                                                                                                                                                          | Y438                                             | 2338.47                                                                              | 2.32                                                          | none                                                                                                                                                                                                                      |
| Eukaryotic translation initiation factor 3 subunit 10                                                                           | P23116        | K.KQPALDVLV@DVMK.S<br>F.LEVGKKQPALDVLV@DVMK                                                                                                                                        | Y32<br>Y32                                       | 1600.72<br>1998.68                                                                   | 0.89<br>0.64                                                  | none<br>none                                                                                                                                                                                                              |
| Eukaryotic translation initiation factor 4 gamma 1                                                                              | Q6NZJ6        | Y.SASQGAY@YIPGQGRSTY.V                                                                                                                                                             | Y110                                             | 1886.33                                                                              | 0.48                                                          | 0.0767 Y.SASQGAY@YIPGQGRSTY.V                                                                                                                                                                                             |
| Eukaryotic translation initiation factor 4B                                                                                     | Q8BGD9        | F.LGNLPHY@DVTEDSIKDFR<br>K.SPPYTAFLGNLPHY@DVTEDSIKDFR.G                                                                                                                            | Y105<br>Y105                                     | 2054.21<br>2973.64                                                                   | 1.26<br>1.23                                                  | none<br>0.1623 K.SPPYTAFLGNLPHY@DVTEDSIKDFR.G                                                                                                                                                                             |
| Eukaryotic initiation factor 4A-I                                                                                               | P60843        | K.VVMALGDY@MGASC*HAC*IGGTNVR.A<br>M.ALGDY@MGASC*H.A<br>R.GFKDQIY@DIFQK.L                                                                                                           | Y126<br>Y126<br>Y197                             | 2520.57<br>1263.36<br>1582.47<br>1583.90                                             | 1.51<br>1.91<br>0.70<br>2.13                                  | none<br>none<br>none<br>none                                                                                                                                                                                              |
| Eukaryotic translation initiation factor 4H                                                                                     | Q9WUK2        | R.AY@SSFSGGR.G<br>H.GSRSQKELPTEPPY@TAY.V<br>Q.KELPTEPPY@TAY.V<br>R.SQKELPTEPPY@VGNLFPNTVQGDIDAIFK.D                                                                                | Y11<br>Y41<br>Y41<br>Y44                         | 981.64<br>2003.78<br>1490.20<br>3633.62                                              | 0.22<br>-0.16<br>1.50<br>0.83                                 | none<br>0.0030 H.GSRSQKELPTEPPY@AY.V<br>0.0841 Q.KELPTEPPY@AY.V<br>0.0019 R.SQKELPTEPPY@AYVGNLFPNTVQGDIDAIFK.D                                                                                                            |
| Elongation factor 1-alpha 1 -- eEF1A-1 (eEF1A-2)                                                                                | P10126        | K.STTTGHLIY@K.C<br>R.EHALLAY@TLGVK.Q                                                                                                                                               | Y29<br>Y141                                      | 1201.30<br>1394.83                                                                   | 0.70<br>0.09                                                  | none<br>0.0802 R.EHALLAY@TLGVK.Q                                                                                                                                                                                          |
| G1 to phase transition 2 (GSP2)                                                                                                 | Q9CY91        | K.TAGVKY@LIVLINK.M                                                                                                                                                                 | Y347                                             | 1512.19                                                                              | 0.29                                                          | 0.1153 K.T@AGVKY@LIVLINK.M                                                                                                                                                                                                |
| Laminin receptor 1 -- ribosomal protein SA                                                                                      | Q8BNL2        | R.ADHQPLTEASY@VNLPTIALC*NTDSPLR.Y                                                                                                                                                  | Y139                                             | 3077.63                                                                              | 1.17                                                          | 0.0029 R.ADHQPLTEAS@VNLPTIALC*NTDSPLR.Y                                                                                                                                                                                   |
| 67 kDa polymerase-associated factor PAF67; Eukaryotic translation initiation factor 3 subunit 6-interacting protein -- Eif3s6ip | Q91YE4        | K.TVSDLIDQKVY@ELQASR.V<br>K.VY@ELQASR.V<br>Y.FHKTVDLIDQKVY@EL.Q<br>R.VSSDVIDQKVY@EQIDIYENSWTK.L<br>R.QLEVY@TSGGDPESVAGEYGR.H<br>K.GDPQVYEELFSY@AC*PK.F<br>R.MQKGDQVYEELFSY@AC*PK.F | Y72<br>Y72<br>Y72<br>Y89<br>Y247<br>Y415<br>Y415 | 2046.87<br>2045.46<br>1045.98<br>2015.25<br>2840.70<br>2194.26<br>1983.38<br>2369.50 | 1.84<br>0.43<br>0.47<br>0.23<br>1.36<br>0.29<br>0.54<br>-0.53 | none<br>none<br>none<br>none<br>0.1171 R.VS@SDVIDQKVYEQIDIYENSWTK.L<br>0.0943 R.QLEVY@TSGGDPESVAGEYGR.H<br>0.0843 K.GDPQVYEELFS@YAC*PK.F<br>0.0788 R.MQKGDQVYEELFS@YAC*PK.F                                               |
| <b>Post-translational modifiers</b>                                                                                             |               |                                                                                                                                                                                    |                                                  |                                                                                      |                                                               |                                                                                                                                                                                                                           |
| N-terminal acetyltransferase complex ARD1 subunit homolog A                                                                     | Q9QY36        | F.QISEVEPKY@YADGEDAY.A<br>L.NFQISEVEPKY@YADGEDAY.A<br>K.YYADGEDAY@AMKR.D                                                                                                           | Y137<br>Y137<br>Y145                             | 2057.32<br>2319.18<br>1632.95                                                        | 0.44<br>1.19<br>0.28                                          | 0.0849 F.QISEVEPKY@YADGEDAY.A<br>0.0569 L.NFQISEVEPKY@YADGEDAY.A<br>none                                                                                                                                                  |
| Probable palmitoyltransferase ZDHHC8                                                                                            | Q5Y5T5        | L.RSQTDSLFGDSGVY@DTPSSY.S                                                                                                                                                          | Y576                                             | 2263.61                                                                              | 1.64                                                          | 0.1236 L.RSQTDSLFGDS@GVYDTPSSY.S                                                                                                                                                                                          |
| Glutathione S-transferase P 1                                                                                                   | P19157        | K.YVTLIY@TNYENK.N<br>K.YVTLIY@TNYENKNDYVK.A                                                                                                                                        | Y108<br>Y108                                     | 1657.98<br>2277.74                                                                   | 0.20<br>0.66                                                  | 0.0215 K.YVTLIY@TNYENK.N<br>0.0671 K.YVTLIY@TNYENKNDYVK.A                                                                                                                                                                 |
| <b>Chaperones and associated proteins</b>                                                                                       |               |                                                                                                                                                                                    |                                                  |                                                                                      |                                                               |                                                                                                                                                                                                                           |



|                                                      |                   |                                                                                                                                                                                                                                                                                                                                                   |                                                                                                |                                                                                                         |                                                                              |                                                                                                                                                                                                                                                                                                     |
|------------------------------------------------------|-------------------|---------------------------------------------------------------------------------------------------------------------------------------------------------------------------------------------------------------------------------------------------------------------------------------------------------------------------------------------------|------------------------------------------------------------------------------------------------|---------------------------------------------------------------------------------------------------------|------------------------------------------------------------------------------|-----------------------------------------------------------------------------------------------------------------------------------------------------------------------------------------------------------------------------------------------------------------------------------------------------|
|                                                      |                   | L.VY@SGMGPDYRVL.V<br>K.LAQQYY@LVY@QEPIPTAQLVQR.V<br>K.LAQQYYLVY@QEPIPTAQLVQR.V<br><br>R.KLAQQYY@LVY@QEPIPTAQLVQR.V<br>R.KLAQQYYLVY@QEPIPTAQLVQR.V<br><br>Y.YLVY@QEPIPTAQLV.V                                                                                                                                                                      | Y75<br>Y97,Y100<br>Y100<br><br>Y97,Y100<br>Y100<br><br>Y100                                    | 1436.84<br>2682.78<br>2602.59<br>2603.19<br>2810.10<br>2730.53<br>2730.10<br>1616.07                    | 0.17<br>1.44<br>1.25<br>1.85<br>0.66<br>1.09<br>0.66<br>1.25                 | none<br>0.0610 K.LAQQYY@LVY@QEPIPTAQLVQR.V<br>0.0997 K.LAQQYY@LVY@QEPIPTAQLVQR.V<br><br>0.0294 R.KLAQQYY@LVY@QEPIPTAQLVQR.V<br>0.1299 R.KLAQQYY@LVY@QEPIPTAQLVQR.V<br><br>none<br>none                                                                                                              |
| Proteasome subunit alpha type 6                      | Q9QUM9            | Y.KC*DPAGYY@C*GF.K                                                                                                                                                                                                                                                                                                                                | Y160                                                                                           | 1417.90                                                                                                 | 0.41                                                                         | 0.1672 Y.KC*DPAGYY@YC*GF.K                                                                                                                                                                                                                                                                          |
| Proteasome subunit beta type 1                       | O09061            | K.GAVY@SFDVPVGSYQR.D<br>K.DVFISAAERDVY@TGDALR.I                                                                                                                                                                                                                                                                                                   | Y149<br>Y215                                                                                   | 1627.36<br>2079.40                                                                                      | 1.63<br>1.41                                                                 | 0.1511 K.GAVYS@FDPVGSYQR.D<br>0.0521 K.DVFISAAERDVYT@GDALR.I                                                                                                                                                                                                                                        |
| Proteasome subunit beta type 4 precursor             | P99026            | M.RVNDSTMLGASGDY@ADF.Q<br>R.VNDSTMLGASGDY@ADFQYLK.Q                                                                                                                                                                                                                                                                                               | Y102<br>Y102                                                                                   | 1900.31<br>2275.68                                                                                      | 1.51<br>0.68                                                                 | 0.1851 M.RVNDSTMLGAS@GDYADF.Q<br>0.1357 R.VNDSTMLGAS@GDYADFQYLK.Q                                                                                                                                                                                                                                   |
| Proteasome subunit beta type 5 precursor             | O55234            | K.RGPGLY@YVDSEGNR.I<br><br>R.GPGLY@YVDSEGNR.I<br>W.DKRGPGLY@YVDSEGNRISGTAF.S<br>R.AIY@QATYR.D<br>R.DAYSQGGAVNLY@HVR.E<br>R.DAYSQGGAVNLY@HVREDGWIR.V                                                                                                                                                                                               | Y116<br><br>Y116<br>Y116<br>Y165<br>Y181<br>Y181                                               | 1663.18<br>1663.57<br>1508.50<br>2483.69<br>1066.45<br>1602.50<br>2359.17                               | 0.42<br>0.81<br>1.84<br>1.52<br>0.94<br>0.76<br>1.07                         | 0.0144 K.RGPGLY@YVDSEGNR.I<br>0.0477 K.RGPGLY@YVDSEGNR.I<br>0.1311 R.GPGLY@YVDSEGNR.I<br>0.0600 W.DKRGPGLY@YVDSEGNRISGTAF.S<br><br>none<br>none<br>none                                                                                                                                             |
| Proteasome subunit beta type 7 precursor             | P70195            | L.VLGGVDVTGPHLY@SIYPHGSTDKLPY.V                                                                                                                                                                                                                                                                                                                   | Y154                                                                                           | 2865.24                                                                                                 | -0.18                                                                        | 0.0434 L.VLGGVDVTGPHLY@IYPHGSTDKLPY.V                                                                                                                                                                                                                                                               |
| <b>Other proteolytic regulators</b>                  |                   |                                                                                                                                                                                                                                                                                                                                                   |                                                                                                |                                                                                                         |                                                                              |                                                                                                                                                                                                                                                                                                     |
| Probable ubiquitin carboxyl-terminal hydrolase FAF-X | P70398            | K.VISSVSY@YTHR.H<br>F.NDY@FEFPRELDMEPY.T<br>K.FNDY@FEFPR.E<br>K.FNDY@FEFPRELDMEPYTVAGVAKL<br>R.PY@T@GNPQYTY@NNWSPVQSNETSNGYFLER.S<br>R.RPYTGNPQY@TYNNWSPVQSNETSNGYFLER.S<br>R.RPYTGNPQYT@Y@NNWSPVQSNETSNGYFLER.S<br>R.S<br>R.RPYTGNPQYTY@NNWSPVQSNETSNGYFLER.S<br>R.RPYTGNPQYTY@NNWSPVQSNETSNGYFLER.S<br>R.RPYTGNPQYTY@NNWSPVQSNETSNGYFLER.S<br>S | Y367<br>Y1815<br>Y1815<br>Y1815<br><br>Y2431,Y2439<br><br>Y2437<br>Y2439<br><br>Y2439<br>Y2439 | 1392.42<br>2046.17<br>1315.06<br>2820.20<br><br>3764.50<br><br>3761.81<br>3841.66<br>3761.57<br>3743.74 | 0.75<br>1.33<br>0.51<br>1.92<br><br>0.92<br><br>2.31<br>1.98<br>1.89<br>2.06 | 0.0543 K.VISSVSY@YTHR.H<br>none<br>none<br>none<br><br>0.0504 R.PY@T@GNPQYTY@Y@NNWSPVQSNETSNGYFLER.S<br>0.0009 R.RPYTGNPQYT@Y@NNWSPVQSNETSNGYFLER.S<br>0.0594 R.RPYTGNPQYTY@Y@NNWSPVQSNETSNGYFLER.S<br>0.0486 R.RPYTGNPQYTY@Y@NNWSPVQSNETSNGYFLER.S<br>0.0699 R.RPYTGNPQYTY@Y@NNWSPVQSNETSNGYFLER.S |
| Prolyl endopeptidase                                 | Q9QUR6            | R.MTELY@DYPK.Y<br>R.MTELY@DYPKYSC*HF.K<br>Y.KERM#TELY@DYPKY.S<br>Y.KERMTELY@DYPKY.S                                                                                                                                                                                                                                                               | Y71<br>Y71<br>Y71<br>Y71                                                                       | 1239.80<br>2062.76<br>1832.87<br>1816.91<br>1816.31                                                     | 0.27<br>0.89<br>1.03<br>1.07<br>0.47                                         | none<br>none<br>0.1508 Y.KERM#TELYDY@PKY.S<br>none<br>0.0945 Y.KERMTELYDY@PKY.S                                                                                                                                                                                                                     |
| <b>NUCLEAR PROTEINS</b>                              |                   |                                                                                                                                                                                                                                                                                                                                                   |                                                                                                |                                                                                                         |                                                                              |                                                                                                                                                                                                                                                                                                     |
| Histone H2B type 1-B                                 | Q64475            | R.KESYSVYVY@K.V                                                                                                                                                                                                                                                                                                                                   | Y43                                                                                            | 1347.62                                                                                                 | 1.98                                                                         | none                                                                                                                                                                                                                                                                                                |
| Histone H4                                           | P62806            | K.RISGLIY@EETRGVL.K<br>R.ISGLIY@EETR.G                                                                                                                                                                                                                                                                                                            | Y51<br>Y51                                                                                     | 1686.95<br>1260.96                                                                                      | 1.05<br>0.34                                                                 | 0.1814 K.RISGLIYEET@RGVL.K<br>0.1364 R.ISGLIYEET@R.G                                                                                                                                                                                                                                                |
| Nucleolar protein 10                                 | Q5RJG1            | K.MGIY@YIPVLGPAPR.W                                                                                                                                                                                                                                                                                                                               | Y339                                                                                           | 1628.06                                                                                                 | 1.21                                                                         | 0.1064 K.MGIY@YIPVLGPAPR.W                                                                                                                                                                                                                                                                          |
| Nucleolin                                            | P09405            | R.SVSLY@YTGEK.G                                                                                                                                                                                                                                                                                                                                   | Y464                                                                                           | 1227.60                                                                                                 | 1.03                                                                         | 0.1078 R.SVSLY@YTGEK.G                                                                                                                                                                                                                                                                              |
| PREDICTED: scaffold attachment factor B              | UPI00001E3<br>C2C | R.RDDAY@WPEAK.R                                                                                                                                                                                                                                                                                                                                   | Y723                                                                                           | 1330.75                                                                                                 | 0.17                                                                         | none                                                                                                                                                                                                                                                                                                |
| SET protein                                          | Q9EQU5            | F.YFDENPY@FENKVL.S<br>R.IDFYFDENPY@FENK.V<br>R.IDFYFDENPY@FENKVL.SK.E<br><br>Y.RIDFYFDENPY@FENKVL.S<br>Y.FDENPY@FENKVL.S                                                                                                                                                                                                                          | Y145<br>Y145<br>Y145<br><br>Y145<br>Y145                                                       | 1758.75<br>1922.53<br>2349.38<br>2349.83<br>2290.25<br>1595.23                                          | 0.96<br>1.72<br>1.29<br>1.74<br>1.19<br>0.51                                 | none<br>none<br>none<br>none<br>none<br>none                                                                                                                                                                                                                                                        |
| Structural maintenance of chromosome 3               | Q9CW03            | Y.IEERLHTEEEKEELAQY@QKW.D                                                                                                                                                                                                                                                                                                                         | Y213                                                                                           | 2783.13                                                                                                 | 1.78                                                                         | none                                                                                                                                                                                                                                                                                                |
| Telomerase-binding protein EST1A                     | P61406            | K.FQNSDNPY@YYPR.T                                                                                                                                                                                                                                                                                                                                 | Y507                                                                                           | 1643.62                                                                                                 | -0.07                                                                        | 0.0945 K.FQNSDNPY@YYPR.T                                                                                                                                                                                                                                                                            |
| Translin                                             | Q62348            | K.KVEEVY@DLSIR.G                                                                                                                                                                                                                                                                                                                                  | Y210                                                                                           | 1531.43                                                                                                 | 1.64                                                                         | none                                                                                                                                                                                                                                                                                                |
| <b>MISCELLANEOUS</b>                                 |                   |                                                                                                                                                                                                                                                                                                                                                   |                                                                                                |                                                                                                         |                                                                              |                                                                                                                                                                                                                                                                                                     |
| Catalase                                             | P24270            | K.GAGAFGY@FEVTHDITR.Y<br>K.LVNADGEAVY@C*K.F                                                                                                                                                                                                                                                                                                       | Y83<br>Y230                                                                                    | 1820.92<br>1420.50                                                                                      | 0.09<br>1.89                                                                 | none<br>none                                                                                                                                                                                                                                                                                        |
| DNA dC->dU editing enzyme APOBEC-3                   | Q99J72            | K.HLC*Y@YHR.M                                                                                                                                                                                                                                                                                                                                     | Y255                                                                                           | 1129.50<br>1128.85                                                                                      | 1.04<br>0.38                                                                 | 0.1538 K.HLC*Y@YHR.M<br>0.0263 K.HLC*Y@YHR.M                                                                                                                                                                                                                                                        |

|                                                                         |                   |                                                                                                                                                                                        |                                                                   |                                                                           |                                                      |                                                                                                                                                                                              |
|-------------------------------------------------------------------------|-------------------|----------------------------------------------------------------------------------------------------------------------------------------------------------------------------------------|-------------------------------------------------------------------|---------------------------------------------------------------------------|------------------------------------------------------|----------------------------------------------------------------------------------------------------------------------------------------------------------------------------------------------|
|                                                                         |                   | R.VKHLC*Y@YHR.M<br>Y.NQRVKHLC*Y@Y.H<br>K.HLC*YY@HR.M<br>Y.NQRVKHLC*YY@.H                                                                                                               | Y255<br>Y255<br>Y256<br>Y256                                      | 1355.71<br>1460.94<br>1128.46<br>1461.15                                  | 0.09<br>0.28<br>0.00<br>0.49                         | 0.0793 R.VKHLC*YY@HR.M<br>0.0052 Y.NQRVKHLC*YY@.H<br>0.0533 K.HLC*Y@YHR.M<br>0.0150 Y.NQRVKHLC*Y@Y.H                                                                                         |
| Pol polyprotein [Moloney murine leukemia virus (MoMLV); Mus musculus]   | P03355            | L.AAAY@QEQLDRPVVPHPY.R<br>H.PY@RVGDTVW.V<br>L.AAAY@QEQLDRPVVPHPY@RVGDTVW.V<br>L.AAAYQEQLDRPVVPHPY@RVGDTVW.V<br>Y.QEQLDRPVVPHPY@RVGDTVW.V<br>K.NLEPRWKGPY@TVL.L<br>R.WKGPY@TVLLTPTALK.V | Y1105<br>Y1118<br>Y1105,Y1118<br>Y1118<br>Y1118<br>Y1142<br>Y1142 | 2035.27<br>1173.01<br>2929.14<br>2849.22<br>2472.33<br>1654.71<br>1869.70 | 1.29<br>0.46<br>1.74<br>1.82<br>1.11<br>1.86<br>0.67 | none<br>none<br>0.1031 L.AAAY@QEQLDRPVVPHPYRVGDT@VW.V<br>0.0174 L.AAAYQEQLDRPVVPHPYRVGDT@VW.V<br>0.0221 Y.QEQLDRPVVPHPYRVGDT@VW.V<br>0.0318 K.NLEPRWKGPY@TVL.L<br>0.0359 R.WKGPY@VLLTPTALK.V |
| Serpin B6                                                               | Q60854            | K.FKLEENYMNMDALY@KLGMTDAFGGR.A<br>Y.NMNDALY@KLGMTDAF.G                                                                                                                                 | Y289<br>Y289                                                      | 2978.72<br>1784.37                                                        | 1.36<br>0.59                                         | none<br>none                                                                                                                                                                                 |
| Voltage-dependent anion-selective channel protein 1                     | Q60932            | K.YRWTEY@GLTFTEK.W                                                                                                                                                                     | Y80                                                               | 1774.62                                                                   | 0.80                                                 | 0.1047 K.YRWTEYGLT@FTEK.W                                                                                                                                                                    |
| <b>FUNCTION UNKNOWN OR UNCERTAIN</b>                                    |                   |                                                                                                                                                                                        |                                                                   |                                                                           |                                                      |                                                                                                                                                                                              |
| <b>Named proteins of unknown/uncertain function</b>                     |                   |                                                                                                                                                                                        |                                                                   |                                                                           |                                                      |                                                                                                                                                                                              |
| Ankyrin repeat domain-containing protein 25                             | Q8BX02            | L.HVPAPFPPTGPGQASPAAFPSKEPDPY@S@VETP<br>YGY.R<br>L.HVPAPFPPTGPGQASPAAFPSKEPDPY@SVETP<br>GY.R                                                                                           | Y32<br>Y32                                                        | 3816.76<br>3737.52                                                        | 1.02<br>1.78                                         | none<br>0.0051 L.HVPAPFPPTGPGQASPAAFPSKEPDPYS@VETPYGY.R                                                                                                                                      |
| Anthrax toxin receptor 1 precursor                                      | Q9CZ52            | K.WPTVDASY@YGGGR.G                                                                                                                                                                     | Y380                                                              | 1452.54                                                                   | 0.91                                                 | 0.0029 K.WPTVDAS@YGGGR.G                                                                                                                                                                     |
| ApoA-I binding protein                                                  | Q8K4Z3            | K.KYQLNLPSYDTEC*VY@RLQ.-<br>K.YQLNLPS@YDPT@ECVY@RLQ.-<br>K.YQLNLPSYDTEC*VY@RLQ.-                                                                                                       | Y279<br>Y279<br>Y279                                              | 2468.40<br>2440.99<br>2340.41                                             | 1.25<br>-1.06<br>1.36                                | none<br>0.0228 K.YQLNLPS@Y@PDTECVY@RLQ.-<br>0.1552 K.YQLNLPSYDPT@EC*VYRLQ.-                                                                                                                  |
| Ataxin-2                                                                | Q70305            | K.GLPQPTISFDGIY@ANVR.M<br>R.VALENDRSEEEKY@TAVQR.N<br>R.VALENDRS*EEEEKY@TAVQR.N                                                                                                         | Y233<br>Y440                                                      | 1928.96<br>2332.70<br>2314.87                                             | 0.99<br>0.62<br>0.79                                 | none<br>0.0531 R.VALENDRSEEEKY@AVQR.N<br>0.0880 R.VALENDRS*EEEEKY@AVQR.N                                                                                                                     |
| Ataxin-2-like protein                                                   | Q7TQH0            | K.GPPQSPVFEVY@NNSR.M                                                                                                                                                                   | Y116                                                              | 1828.51                                                                   | 0.67                                                 | 0.1438 K.GPPQSPVFEVY@NNSR.M                                                                                                                                                                  |
| BAT2-ISO homolog [fragment] (Bat2d)                                     | Q8BMJ4            | R.M#MWGSDPY@HAEPQQAATPK.S<br>R.MM#WGSDDPY@HAEPQQAATPK.S<br>R.MMWGSDDPY@HAEPQQAATPK.S                                                                                                   | Y788<br>Y788<br>Y788                                              | 2243.09<br>2242.48<br>2226.21<br>2225.37                                  | 2.14<br>1.53<br>1.26<br>0.42                         | 0.0067 R.M#MWGSDPY@HAEPQQAATPK.S<br>0.0045 R.M#MWGSDPY@HAEPQQAATPK.S<br>none<br>none                                                                                                         |
| Carnitine deficiency-associated protein CDV3A (CDV3B)                   | Q920I4            | L.TTTRKTPQGPEIY@SDTQFPSLQ.S<br>R.KTPQGPEIY@SDTQFPSLQSTAK.H                                                                                                                             | Y213<br>Y213                                                      | 2673.75<br>2600.06<br>2600.92                                             | 1.46<br>-0.20<br>0.66                                | none<br>0.1233 R.KT@PQGPEIY@SDTQFPSLQSTAK.H<br>0.0557 R.KTPQGPEIYS@DTQFPSLQSTAK.H                                                                                                            |
| Centrosomal protein 170                                                 | UPI0000D62<br>DCC | K.HVEGQSAASEEALFPFC*REPSY@FEIPTK.E                                                                                                                                                     | Y240                                                              | 3379.69                                                                   | 2.16                                                 | 0.0296 K.HVEGQSAASEEALFPFC*REPSY@FEIPTK.E                                                                                                                                                    |
| DENN/MADD domain containing 2C                                          | Q6P9P8            | K.SLENIY@YEPEGQEC*GPSINPLPKPR.R                                                                                                                                                        | Y185                                                              | 2968.93                                                                   | 1.56                                                 | 0.0868 K.SLENIY@YEPEGQEC*GPSINPLPKPR.R                                                                                                                                                       |
| Dihydropyrimidinase-related protein 2                                   | Q08553            | K.THNSALEY@NIFEGMEC*R.G                                                                                                                                                                | Y431                                                              | 2150.87<br>2153.15                                                        | -0.01<br>2.27                                        | 0.1756 K.THNS@ALEYNIFEGMEC*R.G<br>none                                                                                                                                                       |
| Discoidin, CUB and LCCL domain containing protein 2 precursor -- DCBLD2 | Q91ZV3            | K.SAATPEELVY@QVPQSTQELSGAGR.D                                                                                                                                                          | Y744                                                              | 2599.59                                                                   | 1.35                                                 | none                                                                                                                                                                                         |
| Discs, large homolog 5                                                  | Q3UGX5            | Y.KEERDAVY@SEY.K                                                                                                                                                                       | Y429                                                              | 1468.63                                                                   | 0.00                                                 | 0.1192 Y.KEERDAVYS@SEY.K                                                                                                                                                                     |
| Far upstream element binding protein 3 (FUSE binding protein 3) homolog | Q3TIX6            | K.IDSIPHLNNSPLVDPS@VY@GYGVQKRA                                                                                                                                                         | Y51                                                               | 3030.94                                                                   | 1.46                                                 | none                                                                                                                                                                                         |
| GPI-anchored protein p137 - p137GPI                                     | Q60865            | F.TAPRDY@SGY.Q                                                                                                                                                                         | Y609                                                              | 1109.61                                                                   | 0.15                                                 | none                                                                                                                                                                                         |
| Grb10 interacting GYF protein 2                                         | Q6Y7W8            | F.LKEVESPY@EVHDIY.T<br>F.LKEVESPY@EVHDIYTRAY.L                                                                                                                                         | Y1174<br>Y1174                                                    | 1688.15<br>1689.98<br>2179.15<br>2181.01                                  | 0.39<br>2.22<br>0.14<br>2.00                         | 0.1125 F.LKEVES@PYEVHDIY.T<br>none<br>0.1011 F.LKEVES@PYEVHDIYTRAY.L<br>0.1537 F.LKEVES@PYEVHDIYTRAY.L                                                                                       |
| High glucose-regulated protein 8                                        | Q8K325            | K.DGLNDDDFEY@LSPQAR.P                                                                                                                                                                  | Y37                                                               | 2033.48                                                                   | 1.61                                                 | none                                                                                                                                                                                         |
| Large proline-rich protein BAT2                                         | Q7TSC1            | K.KYSSLNLFDTY@KGGK.S<br>K.YSSLNLFDTY@KGGK.S<br>K.APPSTY@SGVFR.T<br>R.LKAPPSTY@SGVFR.T<br>R.IDLY@QQASPPDALR.W                                                                           | Y26<br>Y26<br>Y2098<br>Y2098<br>Y2110                             | 1744.45<br>1617.31<br>1616.78<br>1262.17<br>1504.09<br>1503.70<br>1667.40 | 0.58<br>1.54<br>1.01<br>0.58<br>1.32<br>0.93<br>0.58 | 0.0621 K.KYSSLNLFDTY@KGGK.S<br>0.0231 K.YSSLNLFDTY@KGGK.S<br>0.0479 K.YSSLNLFDTY@KGGK.S<br>0.0488 K.APPSTY@SGVFR.T<br>0.1292 R.LKAPPSTY@SGVFR.T<br>0.0750 R.LKAPPSTY@SGVFR.T<br>none         |
| Leucine rich repeat (in FLII) interacting protein 2 (Lrrfp2) [fragment] | Q8C062            | R.DIY@DLKQIHDVEGR.Y                                                                                                                                                                    | Y5                                                                | 1897.75                                                                   | 1.86                                                 | none                                                                                                                                                                                         |

|                                                                                             |                |                                                                                                                                                                                                                      |                                                               |                                                                                                            |                                                                              |                                                                                                                                                                                                                                                                                                                                               |
|---------------------------------------------------------------------------------------------|----------------|----------------------------------------------------------------------------------------------------------------------------------------------------------------------------------------------------------------------|---------------------------------------------------------------|------------------------------------------------------------------------------------------------------------|------------------------------------------------------------------------------|-----------------------------------------------------------------------------------------------------------------------------------------------------------------------------------------------------------------------------------------------------------------------------------------------------------------------------------------------|
| Mage-d2                                                                                     | Q99PB4         | R.VPNSNPPEY@EFFWGLR.S                                                                                                                                                                                                | Y439                                                          | 2032.59                                                                                                    | 0.66                                                                         | none                                                                                                                                                                                                                                                                                                                                          |
| Nsun2 protein                                                                               | Q91YX9         | R.LAQEGIY@TLYPFINSR.I                                                                                                                                                                                                | Y372                                                          | 1965.41                                                                                                    | 0.42                                                                         | 0.0789 R.LAQEGIY@TLYPFINSR.I                                                                                                                                                                                                                                                                                                                  |
| OTU domain containing 4 protein -- Otud4; PREDICTED: HIV-1 induced protein HIN-1 isoform 1; | UPI0000218 B34 | K.DSSAMC*QSLLY@ELLYEK.V<br>R.ESY@YFGLSPEER.R<br>R.ESY@YFGLSPEER.R<br>R.LLY@EIQNR.D<br>R.LLY@EIQNRDEQAFALSSSSVSQSPQNSNAC*V<br>PR.K                                                                                    | Y169<br>Y436<br>Y437<br>Y458<br>Y458                          | 2130.03<br>1557.08<br>1557.39<br>1129.15<br>3962.24                                                        | 0.10<br>0.42<br>0.73<br>0.57<br>2.40                                         | none<br>0.0644 R.ESY@YFGLSPEER.R<br>0.1265 R.ESY@YFGLSPEER.R<br>none<br>none                                                                                                                                                                                                                                                                  |
| Pericentriolar material gene 1 protein [fragment]                                           | Q91Y51         | K.SNRVPS*ADGNY@RPLAK.T                                                                                                                                                                                               | Y961                                                          | 1807.99                                                                                                    | 1.08                                                                         | 0.1885 K.S*NRVPSADGNY@RPLAK.T                                                                                                                                                                                                                                                                                                                 |
| Periodic tryptophan protein 1 homolog -- Pwp1                                               | Q9D6T6         | R.VTWNHFSPC*HFLASTDDGFVY@NLDAR.S                                                                                                                                                                                     | Y367                                                          | 3150.86                                                                                                    | 1.49                                                                         | none                                                                                                                                                                                                                                                                                                                                          |
| Pleckstrin homology-like domain, family B, member 2 -- PHLDB2                               | Q8K1N2         | K.ADLDHY@TGRDSER.S<br>K.SHDSVY@FLGGLEGR.K<br>R.NKSHDSVY@FLGGLEGR.K                                                                                                                                                   | Y130<br>Y161<br>Y161                                          | 1616.13<br>1617.10<br>1860.31                                                                              | 1.44<br>0.36<br>1.43                                                         | 0.1046 K.ADLDHYT@GRDSER.S<br>0.1491 K.SHDS@VYFLGGLEGR.K<br>0.0984 R.NKS@HDSVYFLGGLEGR.K                                                                                                                                                                                                                                                       |
| Protein FAM51A1                                                                             | Q8BHE1         | R.LNDY@VNADHGLY@FNHR.R<br>R.LNDY@VNADHGLY@FNHR.R<br>R.LNDYVNADHGLY@FNHR.R                                                                                                                                            | Y167,Y175<br>Y167,Y175<br>Y175                                | 2109.77<br>2266.17<br>2028.80                                                                              | 1.86<br>2.16<br>0.89                                                         | none<br>none<br>none                                                                                                                                                                                                                                                                                                                          |
| PYM protein                                                                                 | Q8CHP5         | R.VKEGYVPQEEVPVYENKY@VK.F                                                                                                                                                                                            | Y49                                                           | 2479.14                                                                                                    | 1.91                                                                         | 0.0534 R.VKEGYVPQEEVPVY@ENKYVK.F                                                                                                                                                                                                                                                                                                              |
| Suppression of tumorigenicity 5                                                             | Q924W7         | K.STLEENAY@EDIVGGLPKENPY@EDVDLK.N                                                                                                                                                                                    | Y485,Y498                                                     | 3199.32                                                                                                    | 1.87                                                                         | none                                                                                                                                                                                                                                                                                                                                          |
| SR-related CTD associated factor 6                                                          | Q8CGZ0         | R.NSEGWEQNGLY@EFFR.A                                                                                                                                                                                                 | Y723                                                          | 1956.63                                                                                                    | 0.80                                                                         | none                                                                                                                                                                                                                                                                                                                                          |
| Tanc2 protein [fragment]                                                                    | Q5EBP6         | K.TNNAQNGHLEDDY@YSPHGMLANGSR.G                                                                                                                                                                                       | Y1349                                                         | 2955.55                                                                                                    | 1.26                                                                         | 0.0660 K.TNNAQNGHLEDDY@SPHGMLANGSR.G                                                                                                                                                                                                                                                                                                          |
| Testis derived transcript                                                                   | Q921W7         | K.HTM#NEGEPAIY@AER.A<br>K.HTMNEGEPAIY@AER.A                                                                                                                                                                          | Y249<br>Y249                                                  | 1713.53<br>1698.74<br>1698.44                                                                              | -0.20<br>1.01<br>0.71                                                        | none<br>none<br>none                                                                                                                                                                                                                                                                                                                          |
| Trinucleotide repeat containing 6b                                                          | Q6NVE4         | K.DLGTDDSGPY@FEK.G<br>K.DLGTDDSGPY@FEKGSGHGLFGNSTAQSR.G<br>K.GIQNIDPESDPY@VTPGVLGGTTTSPIVDTHQL<br>LR.D                                                                                                               | Y1128<br>Y1128<br>Y1440                                       | 1510.29<br>2967.49<br>3874.35                                                                              | 0.64<br>1.16<br>1.46                                                         | 0.1792 K.DLGTDDS@GPYFEK.G<br>0.1242 K.DLGTDDS@GPYFEKGGHGLFGNSTAQSR.G<br>0.1664 K.GIQNIDPESDPYV@PGSVLGGTTTSPIVDTHQLLR.D                                                                                                                                                                                                                        |
| Tripartite motif protein 16                                                                 | Q99PP9         | F.DC*KFSEPVY@AAF.W<br>K.FSEPVY@AAFWSK.K                                                                                                                                                                              | Y523<br>Y523                                                  | 1514.01<br>1625.77                                                                                         | 0.39<br>0.99                                                                 | none<br>none                                                                                                                                                                                                                                                                                                                                  |
| Tudor domain-containing protein 3                                                           | Q91W18         | L.SNIKPVQTEAWEEEGTY@DHTIEF.R                                                                                                                                                                                         | Y618                                                          | 2804.47                                                                                                    | 1.22                                                                         | 0.0786 L.SNIKPVQTEAWEEEGTY@DHTIEF.R                                                                                                                                                                                                                                                                                                           |
| Ubiquitin-associated protein 2 - UBAP2                                                      | Q91VX2         | R.LPMDY@YGIPFAAPTALASR.D<br>R.LPM#DY@YGIPFAAPTALASR.D<br>R.LPMDY@YGIPFAAPTALASR.D<br>F.AAPTALASRDGNLANNPY@SGDVTKF.G<br>L.ASRDGNLANNPY@SGDVTKF.G<br>N.NPY@SGDVTKF.G<br>R.DGNLANNPY@SGDVTKF.F<br>K.SQASKPTY@GSAPYWTN.- | Y853<br>Y853<br>Y854<br>Y876<br>Y876<br>Y876<br>Y876<br>Y1124 | 2135.76<br>2135.80<br>2150.88<br>2134.39<br>2631.57<br>2107.29<br>2106.87<br>1207.92<br>1645.46<br>1838.21 | 1.72<br>1.76<br>0.84<br>0.35<br>1.31<br>1.33<br>0.91<br>0.38<br>0.74<br>0.40 | 0.0560 R.LPMDY@YGIPFAAPTALASR.D<br>0.0580 R.LPMDY@YGIPFAAPTALASR.D<br>0.0345 R.LPM#DY@YGIPFAAPTALASR.D<br>0.0292 R.LPMDY@YGIPFAAPTALASR.D<br>0.0472 F.AAPTALASRDGNLANNPY@GDVTKF.G<br>0.0376 L.ASRDGNLANNPY@GDVTKF.G<br>0.0288 L.ASRDGNLANNPY@GDVTKF.G<br>0.1018 N.NPY@GDVTKF.G<br>0.0869 R.DGNLANNPY@GDVTKF.F<br>0.0221 K.SQASKPTY@GSAPYWTN.- |
| Ubiquitin associated protein 2-like -- UBAP2L                                               | Q80X50         | Y.TSQNNAQGPLY@EQRSTQ.T<br>R.FPLDY@YSIPFPTPTPLTGR.D<br>R.DGSLASNPY@SGDLTK.F<br>L.TGRDGLASNPY@SGDLTK.F                                                                                                                 | Y612<br>Y854<br>Y878<br>Y878                                  | 2003.09<br>2002.45<br>2364.17<br>1605.11<br>2067.39                                                        | 1.19<br>0.55<br>1.00<br>0.39<br>1.43                                         | none<br>none<br>0.0827 R.FPLDY@YSIPFPTPTPLTGR.D<br>0.0496 R.DGSLASNPY@GDLTK.F<br>0.0571 L.TGRDGLASNPY@GDLTK.F                                                                                                                                                                                                                                 |
| Yippee-like 5                                                                               | Q65Z92         | N.S@KLGWIY@EFATEDSQRY.K                                                                                                                                                                                              | Y84                                                           | 2252.51                                                                                                    | -0.49                                                                        | none                                                                                                                                                                                                                                                                                                                                          |
| YTH domain protein 3 -- Ythdf3                                                              | Q6NXJ8         | K.SVDYNAY@AGVWSQDKWK.G                                                                                                                                                                                               | Y488                                                          | 2196.81                                                                                                    | 0.80                                                                         | none                                                                                                                                                                                                                                                                                                                                          |
| Novel ZZ type zinc finger domain containing protein                                         | Q5SSH7         | K.WKDFELPGDTLY@YR.F<br>W.KDFELPGDTLY@YR                                                                                                                                                                              | Y2706<br>Y2706                                                | 1883.40<br>1884.26<br>1541.44                                                                              | 0.53<br>1.39<br>0.75                                                         | 0.1001 K.WKDFELPGDTLY@YR.F<br>0.0697 K.WKDFELPGDTLY@YR.F<br>0.1259 W.KDFELPGDTLY@YR                                                                                                                                                                                                                                                           |
| <b>Unnamed proteins of unknown/uncertain function</b>                                       |                |                                                                                                                                                                                                                      |                                                               |                                                                                                            |                                                                              |                                                                                                                                                                                                                                                                                                                                               |
| BC003940 protein [fragment]                                                                 | Q8QZS4         | R.FIY@EAWQGVVER.D                                                                                                                                                                                                    | Y70                                                           | 1479.96                                                                                                    | 2.28                                                                         | none                                                                                                                                                                                                                                                                                                                                          |
| BC053440 protein [fragment]                                                                 | Q8R2W2         | K.INDTMY@FAPSMK.D                                                                                                                                                                                                    | Y19                                                           | 1498.68                                                                                                    | 1.03                                                                         | none                                                                                                                                                                                                                                                                                                                                          |
| Hypothetical ATP/GTP-binding site motif A homolog                                           | Q3UHH1         | L.HKTKEAAPVGEEDDDYQAY@Y.L                                                                                                                                                                                            | Y729                                                          | 2481.38                                                                                                    | 1.32                                                                         | 0.0117 L.HKTKEAAPVGEEDDDYQAY@Y.L                                                                                                                                                                                                                                                                                                              |

|                                                                                                                                                                              |                   |                                                                                                                                                                                                  |                                      |                                                     |                                      |                                                                                                                                                                                                                       |
|------------------------------------------------------------------------------------------------------------------------------------------------------------------------------|-------------------|--------------------------------------------------------------------------------------------------------------------------------------------------------------------------------------------------|--------------------------------------|-----------------------------------------------------|--------------------------------------|-----------------------------------------------------------------------------------------------------------------------------------------------------------------------------------------------------------------------|
| hypothetical ATP/GTP-binding site motif A (P-loop)/Zinc finger C-x8-C-x5-C-x3-H type containing protein                                                                      | Q9DBS7            | K.EAVY@SGVQSLR.S                                                                                                                                                                                 | Y508                                 | 1289.24                                             | 0.61                                 | 0.1217 K.EAVYS@GVQSLR.S                                                                                                                                                                                               |
| hypothetical Domain of unknown function DUF71 containing protein                                                                                                             | Q9CQ28            | R.VYTQC*EGDEVEDLY@ELLK.L                                                                                                                                                                         | Y97                                  | 2282.98                                             | -0.01                                | none                                                                                                                                                                                                                  |
| hypothetical G-protein beta WD-40 repeat/Trp-Asp (WD) repeats profile/Trp-Asp (WD) repeats circular profile/Serine-rich region profile/WD40-like containing protein -- WDR70 | Q3TWF6            | K.AAEDNPY@WVSPAYSK.T                                                                                                                                                                             | Y621                                 | 1778.50                                             | 0.72                                 | none                                                                                                                                                                                                                  |
| hypothetical 5'3'-Exonuclease N- and I-domains containing protein                                                                                                            | Q8BM14            | R.LQENC*GANTSPLY@SFSK.A                                                                                                                                                                          | Y747                                 | 2110.82                                             | -0.07                                | 0.0624 R.LQENC*GANTSPLY@SFSK.A                                                                                                                                                                                        |
| DNA segment, Chr 5, ERATO Doi 585, expressed -- D5Ert585e                                                                                                                    | Q6P1H6            | R.IREYLM#GHY@YVPLLR.A<br>R.IREYLMGHY@YVPLLR.A                                                                                                                                                    | Y483<br>Y483                         | 2021.02<br>2004.32                                  | 1.99<br>1.29                         | 0.0536 R.IREYLM#GHY@YVPLLR.A<br>0.1334 R.IREYLMGHY@YVPLLR.A                                                                                                                                                           |
| hypothetical protein: E230015L20Rik protein                                                                                                                                  | Q8C304            | R.TNEIY@YLDPDAPLSRPSTQDNQYQK.S                                                                                                                                                                   | Y416                                 | 3036.73                                             | 0.33                                 | 0.0924 R.TNEIY@YLDPDAPLSRPSTQDNQYQK.S                                                                                                                                                                                 |
| hypothetical protein LOC106840                                                                                                                                               | Q8C4B4            | K.PEDNVY@SIDFTR.F<br>R.VTENYLC*KPEDNVY@SIDFTR.F                                                                                                                                                  | Y92<br>Y92                           | 1535.89<br>2544.95                                  | 0.21<br>1.82                         | 0.0459 K.PEDNVYS@IDFTR.F<br>0.0678 R.VTENYLC*KPEDNVYS@IDFTR.F                                                                                                                                                         |
| PREDICTED: zinc finger protein 650                                                                                                                                           | UPI0000D65<br>C57 | K.KLPIAEEQIY@PWDTC*AAVHDVRL                                                                                                                                                                      | Y335                                 | 2822.45                                             | 2.13                                 | none                                                                                                                                                                                                                  |
| PREDICTED: similar to Oligophrenin 1                                                                                                                                         | UPI0000D66<br>8EB | K.LWLEAMDGKEPIY@TLPAISK.K<br>R.KLWLEAM#DGKEPIY@TLPAISK.K<br>R.KLWLEAMDGKEPIY@TLPAISK.K                                                                                                           | Y371<br>Y371<br>Y371                 | 2468.94<br>2612.62<br>2598.34                       | 0.65<br>0.24<br>1.96                 | 0.0652 K.LWLEAMDGKEPIY@TLPAISK.K<br>0.0042 R.KLWLEAM#DGKEPIY@TLPAISK.K<br>0.0228 R.KLWLEAMDGKEPIY@TLPAISK.K                                                                                                           |
| PREDICTED: similar to ring finger and KH domain containing 2                                                                                                                 | UPI0000428<br>93E | R.LSEQGGDFGY@SGYLFPGYGVGK.Q                                                                                                                                                                      | Y188                                 | 2379.95                                             | 1.88                                 | 0.1423 R.LSEQGGDFGY@SGYLFPGYGVGK.Q                                                                                                                                                                                    |
| hypothetical protein 1500002O20Rik                                                                                                                                           | Q9DB90            | K.EGQRPTQPVY@QIQNR.G                                                                                                                                                                             | Y147                                 | 1895.06                                             | 1.13                                 | none                                                                                                                                                                                                                  |
| MKIAA0183 protein [fragment]                                                                                                                                                 | Q6A0A9            | K.PAVPQVPSPGGTPGQAPYPY@SLSEPALTLDTSG<br>K.N<br>K.PAVPQVPS@PGGTPGQAPYPY@SLSEPALTLDTSG<br>GK.N<br>K.PAVPQVPSPGGT@PGQAPYPY@SLSEPALTLDTSG<br>GK.N<br>F.GGHY@GETVATGPY@RAF.R<br>F.GGHYGETVATGPY@RAF.R | Y457<br>Y457<br>Y457<br>Y968<br>Y968 | 3461.89<br>3541.89<br>3541.83<br>1843.31<br>1763.46 | 2.18<br>2.18<br>2.11<br>0.52<br>0.67 | 0.0207 K.PAVPQVPSPGGTPGQAPYPYS@LSEPALTLDTSGK.N<br>0.0895 K.PAVPQVPSPGGTPGQAPY@PY@SLSEPALTLDTSGK.N<br>0.0049 K.PAVPQVPS@PGGTPGQAPYPY@SLSEPALTLDTSGK.N<br>0.0645 F.GGHY@GETVAT@GPYRAF.R<br>0.1678 F.GGHYGETVAT@GPYRAF.R |
| Protein FAM125A                                                                                                                                                              | Q78HU3            | R.RTDSIY@EASS@LYGISAMDGVPFTLHPR.F                                                                                                                                                                | Y202                                 | 3144.64                                             | 1.18                                 | 0.0215 R.RTDSIY@EASS@SLYGISAMDGVPFTLHPR.F                                                                                                                                                                             |
| PREDICTED: similar to la related protein isoform 1                                                                                                                           | UPI0000D66<br>C58 | R.THFYQFGY@R.K                                                                                                                                                                                   | Y412                                 | 1414.59                                             | 0.99                                 | none                                                                                                                                                                                                                  |
| Similar to leucine-rich neuronal protein homolog                                                                                                                             | Q3U222            | L.GFGSC*HEELY@SGRPY.G                                                                                                                                                                            | Y203                                 | 1839.35<br>1839.10                                  | 0.62<br>0.37                         | 0.0896 L.GFGSC*HEELYS@GRPY.G<br>0.1651 L.GFGSC*HEELYS@GRPY.G                                                                                                                                                          |
| Similar to RIKEN cDNA 4930527D15 gene [fragment]                                                                                                                             | Q922B5            | K.EKLLLC*HGPS@LSPALSGVRY@NAEK.K                                                                                                                                                                  | Y39                                  | 2910.62                                             | -0.84                                | 0.0717 K.EKLLLC*HGPSLS@LSPALSGVRY@NAEK.K                                                                                                                                                                              |

**END**



**Table S2. Phosphotyrosine sites from the Src-transformed mouse embryo fibroblast population**

| Protein Name(s) <sup>a</sup>                                                    | UniProt # <sup>a</sup> | Peptide <sup>b</sup>                                                                                                                                                                                                         | pY site(s) <sup>b</sup>                                                       | Comments <sup>i</sup>                                                                                                                                                                                                                                                                                                                                                                                                                                         |
|---------------------------------------------------------------------------------|------------------------|------------------------------------------------------------------------------------------------------------------------------------------------------------------------------------------------------------------------------|-------------------------------------------------------------------------------|---------------------------------------------------------------------------------------------------------------------------------------------------------------------------------------------------------------------------------------------------------------------------------------------------------------------------------------------------------------------------------------------------------------------------------------------------------------|
| <b>SIGNALING: PROTEIN KINASES AND PHOSPHATASES</b>                              |                        |                                                                                                                                                                                                                              |                                                                               |                                                                                                                                                                                                                                                                                                                                                                                                                                                               |
| <b>Tyrosine kinases (nonreceptor)</b>                                           |                        |                                                                                                                                                                                                                              |                                                                               |                                                                                                                                                                                                                                                                                                                                                                                                                                                               |
| Rous sarcoma oncogene, isoform 2 -- Src (Yes) (Fyn)                             | Q80XU2                 | F.VALY@DYESRTETDL.S<br>F.VALY@DYESRTETDLSF.K<br>R.AGPLAGGVTTFVALY@DYESR.T<br>R.TQFNLSLQQLVAY@YSK.H<br><br>L.IEDNEY@TARQGAKFPIKW.T<br>R.LIEDNEY@TAR.Q<br><br>K.FPIKWTAPEAALY@GR.F<br><br>K.WTAPEAALY@GR.F<br>W.TAPEAALY@GRF.T | Y92<br>Y92<br>Y92<br>Y231<br><br>Y418<br>Y418<br><br>Y438<br><br>Y438<br>Y438 | SH3 domain site<br><br>SH2 domain site<br><br>Kinase domain activation loop site; peptide identical in Fyn (P39688) and Yes (Q04736). Equivalent Hck (P08103) peptide (IIEDNEY@TAR) also not distinguishable by MS.<br><br>Kinase domain site; peptide identical in Fyn (P39688) and Yes (Q04736)<br><br>Kinase domain site; peptide identical in Fyn (P39688) and Yes (Q04736)<br><br>Kinase domain site; peptide identical in Fyn (P39688) and Yes (Q04736) |
| Proto-oncogene tyrosine-protein kinase LCK                                      | P06240                 | F.GLARLIEDNEY@TAREGAKFPIKW.T<br>F.GLARLIEDNEY@TAREGAKFP<br>R.LIEDNEY@TAREGAKFPIKW.T                                                                                                                                          | Y393<br>Y393<br>Y393                                                          | Kinase domain activation loop site                                                                                                                                                                                                                                                                                                                                                                                                                            |
| Tyrosine-protein kinase CSK                                                     | P41241                 | L.IKPKVMEGTVAQDEFY@RSGWA                                                                                                                                                                                                     | Y184                                                                          | A tyrosine kinase that phosphorylates and inhibits Src family kinases. Site lies between SH2 and kinase domains.                                                                                                                                                                                                                                                                                                                                              |
| Fer                                                                             | P70451                 | K.VQENDGKEPPVNY@EEDAR.S<br>F.GMSRQEDGGVY@SSSGL.K                                                                                                                                                                             | Y402<br>Y715                                                                  | Site N-terminal to SH2 domain<br>Kinase domain activation loop site                                                                                                                                                                                                                                                                                                                                                                                           |
| Proto-oncogene tyrosine-protein kinase ABL1                                     | P00520                 | R.LMTGDTY@TAHAGAK.F                                                                                                                                                                                                          | Y393                                                                          | Kinase domain activation loop site                                                                                                                                                                                                                                                                                                                                                                                                                            |
| Focal adhesion kinase, isoform 3 -- FAK                                         | P34152-3               | R.YM#EDSTY@YK.A<br>R.YMEDSTY@YK.A<br>R.YMEDSTY@YKASK.G<br>R.YMEDSTY@Y@K.A<br>R.YMEDSTY@Y@KASK.G                                                                                                                              | Y576<br>Y576<br>Y576<br>Y576,Y577<br>Y576,Y577                                | Kinase domain activation loop sites                                                                                                                                                                                                                                                                                                                                                                                                                           |
| <b>Tyrosine kinases (receptor)</b>                                              |                        |                                                                                                                                                                                                                              |                                                                               |                                                                                                                                                                                                                                                                                                                                                                                                                                                               |
| Discoidin domain receptor 2 precursor -- DDR2                                   | Q62371                 | F.GMSRNLY@SGDY@Y.R<br>R.NLY@S@GDY@YR.I<br>R.NLY@SGDY@YR.I                                                                                                                                                                    | Y735,Y739<br>Y735<br>Y735,Y739                                                | Kinase domain activation loop sites                                                                                                                                                                                                                                                                                                                                                                                                                           |
| Ephrin type-A receptor 2 precursor                                              | Q03145                 | K.SEQLKPLKT@YVDPHTY@EDPNQAVLK.F<br>F.GLSRVLEDDPEATY@TTSGGKIPRW.T                                                                                                                                                             | Y595<br>Y773                                                                  | Site is N-terminal to kinase domain<br>Kinase domain activation loop site                                                                                                                                                                                                                                                                                                                                                                                     |
| Eph receptor B4                                                                 | Q91YM0                 | Y.LIGHGKTVY@IDPFTY@EDPNEAVREF.A                                                                                                                                                                                              | Y590,Y596                                                                     | Sites are N-terminal to kinase domain                                                                                                                                                                                                                                                                                                                                                                                                                         |
| Tyrosine-protein kinase receptor UFO precursor -- Axl                           | Q00993                 | K.IYNGDY@YR.Q<br>K.KIYNGDY@YR.Q                                                                                                                                                                                              | Y696<br>Y696                                                                  | Kinase domain activation loop site                                                                                                                                                                                                                                                                                                                                                                                                                            |
| <b>Other protein kinases</b>                                                    |                        |                                                                                                                                                                                                                              |                                                                               |                                                                                                                                                                                                                                                                                                                                                                                                                                                               |
| Akt1: RAC-alpha serine/threonine-protein kinase (Akt-2) (Akt-3)                 | P31750                 | K.TFC*GTPEYLAPEVLEDNDY@GR.A                                                                                                                                                                                                  | Y326                                                                          | Kinase domain site. Peptide identical in Akt-2 (Q06823) and Akt-3 (Q9WUA6)                                                                                                                                                                                                                                                                                                                                                                                    |
| Akt-3: RAC-gamma serine/threonine-protein kinase                                | Q9WUA6                 | K.Y@Y@AM#KILKKEVIAK.D                                                                                                                                                                                                        | Y173,Y174                                                                     | Site in kinase domain near conserved lysine                                                                                                                                                                                                                                                                                                                                                                                                                   |
| Calcium/calmodulin-dependent protein kinase type 1 --CaM kinase I               | Q91YS8                 | R.DLKPENLLYY@SLDEDSK.I                                                                                                                                                                                                       | Y150                                                                          | Kinase domain site                                                                                                                                                                                                                                                                                                                                                                                                                                            |
| Casein kinase I isoform alpha                                                   | Q8BK63                 | R.TLNHQDY@TFDWTMLK.Q                                                                                                                                                                                                         | Y294                                                                          | Site in C-terminal inhibitory domain                                                                                                                                                                                                                                                                                                                                                                                                                          |
| Casein kinase II, alpha chain                                                   | Q60737                 | K.VLGTEDLY@DYIDKYNIELDPR.F                                                                                                                                                                                                   | Y255                                                                          | Site in kinase domain near C-terminus                                                                                                                                                                                                                                                                                                                                                                                                                         |
| CDC2: Cell division control protein 2 homolog - CDK1 (CDK2)                     | P11440                 | K.IGEGTY@GVVYK.G<br>K.IGEGT*Y@GVVYK.G<br>K.IGEGTYGVVY@K.G<br>K.IGEGTYGVVY@KGR.H                                                                                                                                              | Y15<br>Y15<br>Y19<br>Y19                                                      | Site in kinase domain ATP-binding region. Peptide also in CDK2 (P97377)<br>Site in kinase domain ATP-binding region. Peptide also in CDK2 (P97377)<br>Peptide unique to Cdc2                                                                                                                                                                                                                                                                                  |
| Dual-specificity tyrosine-phosphorylation regulated kinase 1A --DYRK1A (DYRK1B) | Q61214                 | K.HINEVY@YAK.K<br>K.VYNDGYDDNY@DYIVK.N<br>R.KVYNDGYDDNY@DYIVK.N                                                                                                                                                              | Y111<br>Y145<br>Y145                                                          | Site N-terminal to kinase domain. Peptide identical to DYRK1B (Q9Z188)<br>Site N-terminal to kinase domain.                                                                                                                                                                                                                                                                                                                                                   |

|                                                                                                     |        |                                                                                                                                                                                                                                                                                                                  |                                                             |                                                                                                                                                                                                                                                                                            |
|-----------------------------------------------------------------------------------------------------|--------|------------------------------------------------------------------------------------------------------------------------------------------------------------------------------------------------------------------------------------------------------------------------------------------------------------------|-------------------------------------------------------------|--------------------------------------------------------------------------------------------------------------------------------------------------------------------------------------------------------------------------------------------------------------------------------------------|
|                                                                                                     |        | Y.NDGYDDDN@DYIVKNGEKW.M<br>R.IYQY@IQSR.F                                                                                                                                                                                                                                                                         | Y145<br>Y321                                                | Kinase domain activation loop site. Peptide identical to DYRK1B (Q9Z188).                                                                                                                                                                                                                  |
| Glycogen synthase kinase-3 beta -- GSK-3 beta (GSK-3 alpha)                                         | Q9WV60 | L.VRGEPNVSY@IC*SR.Y<br>L.VRGEPNVSY@IC*SR.Y.R<br>R.GEPNVSY@IC*SR.Y                                                                                                                                                                                                                                                | Y216<br>Y216<br>Y216                                        | Kinase domain activation loop site. All peptides identical to GSK-3 alpha (UPI00001C3B75).                                                                                                                                                                                                 |
| RIKEN CDNA C230081A13: hypothetical Protein kinase A anchoring domain containing protein -- Sgk269  | Q8BX56 | K.NAIKVPVIVNPAY@DNLAII@K.S<br>K.VPVIINPNAY@DNLAII@K.S<br>K.VPVIINPNAY@DNLAII@K.S<br>N.AIKVPVIVNPAY@DNLAII@KSFL                                                                                                                                                                                                   | Y632,Y638<br>Y632,Y638<br>Y638<br>Y632,Y638                 | This entry contains the N terminal region of putative protein serine/threonine kinase Sgk269 (NKF3 family) in the KinBase resource. MKIAA2002 protein [fragment] (Q69Z38) contains the Sgk269 kinase domain. There is no overlap between Q8BX56 and Q69Z38. Possible alternative splicing. |
| Serine/threonine-protein kinase Nek9                                                                | Q8K1R7 | R.NKEVYSWGC*GEY@GR.L                                                                                                                                                                                                                                                                                             | Y509                                                        | Site is C-terminal to kinase domain. Not conserved in NEK family.                                                                                                                                                                                                                          |
| Serine/threonine-protein kinase PRP4 homolog                                                        | Q61136 | K.LC*DFGSASHVADNDITPY@LVSR.F<br>H.VADNDITPY@LVSRF.Y                                                                                                                                                                                                                                                              | Y849<br>Y849                                                | DYRK family. Kinase domain activation loop site.                                                                                                                                                                                                                                           |
| <b>Protein phosphatases</b>                                                                         |        |                                                                                                                                                                                                                                                                                                                  |                                                             |                                                                                                                                                                                                                                                                                            |
| Low molecular weight phosphotyrosine protein phosphatase                                            | Q9D358 | K.QLIIEDPY@YGNDSDFEVVYQQC*LR.C<br>L.GSYDPQQLIIEDPY@YGNDSDFE<br>K.QLIIEDPY@YGNDSDFEVVYQQC*LR.C                                                                                                                                                                                                                    | Y131<br>Y131<br>Y132                                        | Alternative Names: ACP1, Protein-tyrosine-phosphatase, acid phosphatase 1                                                                                                                                                                                                                  |
| 14 kDa phosphohistidine phosphatase -- Phosphohistidine phosphatase 1                               | Q9DAK9 | R.KIHVYGY@SM#GYGR.A                                                                                                                                                                                                                                                                                              | Y92                                                         |                                                                                                                                                                                                                                                                                            |
| Protein phosphatase 1 regulatory subunit 12A                                                        | Q9DBR7 | R.TYDETY@TR.Y<br>Y.SRTYDETY@TRY.R                                                                                                                                                                                                                                                                                | Y764<br>Y764                                                |                                                                                                                                                                                                                                                                                            |
| Protein phosphatase 2 regulatory subunit B56 delta isoform                                          | Q99PC9 | R.KSELPODVY@T*IK.A                                                                                                                                                                                                                                                                                               | Y572                                                        |                                                                                                                                                                                                                                                                                            |
| Serine/threonine protein phosphatase 2A, catalytic subunit, alpha isoform -- PP2A alpha (PP2A beta) | P63330 | R.QITQVY@GFYDEC*LR.K<br>R.C*GNQAAMELDDTLKY@SFLQFDPAPR.R                                                                                                                                                                                                                                                          | Y127<br>Y284                                                | Ubiquitous cytosolic Ser/Thr protein phosphatase, catalytic subunit. Both peptides conserved in PP2A beta isoform (P62715)                                                                                                                                                                 |
| Tyrosine-protein phosphatase, non-receptor type 11 -- SHP-2                                         | P35235 | H.IKIQNTGDY@YDLY.G<br>K.IQNTGDY@YDLYGGEK.F                                                                                                                                                                                                                                                                       | Y62<br>Y62                                                  | Site lies in the N-terminal SH2 domain.                                                                                                                                                                                                                                                    |
| Tyrosine-protein phosphatase, non-receptor type 14                                                  | Q62130 | R.NLNIINTHAYNQPEELVY@SQPEMR.E                                                                                                                                                                                                                                                                                    | Y485                                                        | Site lies between FERM and PTPase domains.                                                                                                                                                                                                                                                 |
| <b>SIGNALING: SMALL G PROTEINS AND REGULATORS</b>                                                   |        |                                                                                                                                                                                                                                                                                                                  |                                                             |                                                                                                                                                                                                                                                                                            |
| ARF GTPase-activating protein GIT1                                                                  | Q68FF6 | F.HSTELEDDAIY@SVHVPAGLYR<br>R.LQPFHS@TELEDDAIY@SVHVPAGLYR.I<br>R.LQPFHST@ELEDDAIY@SVHVPAGLYR.I<br>R.LQPFHSTELEDDAIY@SVHVPAGLYR@R.I<br>R.LQPFHSTELEDDAIY@SVHVPAGLYR.I<br>R.LQPFHS*TELEDDAIY@SVHVPAGLYR.I                                                                                                          | Y554<br>Y554<br>Y554<br>Y554,Y563<br>Y554<br>Y554           | ARF GTPase-activating protein (GAP) activity.                                                                                                                                                                                                                                              |
| Engulfment and cell motility protein 2 -- ELMO2                                                     | Q8BHL5 | K.EVC*DGWSLPNPEY@YTLR.Y                                                                                                                                                                                                                                                                                          | Y48                                                         | Proposed to be required in complex with DOCK1 to activate Rac. Enhances the GEF activity of DOCK1.                                                                                                                                                                                         |
| Glucocorticoid receptor DNA binding factor 1 [fragment] -- p190RhoGAP                               | Q91YM2 | R.NEEENIY@SVPHDSTQGK.I                                                                                                                                                                                                                                                                                           | Y943                                                        | Represses transcription of the glucocorticoid receptor by binding to a cis-acting regulatory sequence. Better known as p190RhoGAP. Phosphorylation of this putative Src site (equivalent to Y1105 in the human protein) positively controls GAP activity, thus inhibiting Rho.             |
| Myosin phosphatase Rho-interacting protein -- MRIP                                                  | P97434 | K.VRVESGY@FSLEK.A<br>K.YASDKYKDIY@TELSIAK.A                                                                                                                                                                                                                                                                      | Y268<br>Y944                                                | Required for regulation of actin cytoskeleton by RhoA and ROCK1. Alternate name: Rho-interacting protein 3, RIP3.                                                                                                                                                                          |
| Rab GDP dissociation inhibitor alpha -- Rab GDI alpha (Rab GDI beta)                                | P50396 | K.VLHMDRNPY@YGGESASITPLEELYK.R<br>K.SPYLYPLY@GLGELPQGFAR.L                                                                                                                                                                                                                                                       | Y38<br>Y229                                                 | Regulates the GDP/GTP exchange reaction of Rab proteins.<br>This peptide identical in Rab GDP dissociation inhibitor beta (Q61598).                                                                                                                                                        |
| Rab GDP dissociation inhibitor beta -- Rab GDI beta                                                 | Q61598 | K.KVLHMDQNPY@YGGESASITPLEDYK.R<br>K.KVLHMDQNPY@YGGESASITPLEDYK.R.F<br>K.VLHM#DQNPY@YGGESASITPLEDYK.R.F<br>K.VLHMDQNPY@YGGESASITPLEDYK.R<br>K.VLHMDQNPY@YGGESASITPLEDYK.R.F<br>L.HMDQNPY@YGGESASITPLEDYK<br>K.KVLHMDQNPYY@GGESASITPLEDYK.R.F<br>K.VLHM#DQNPYY@GGESASITPLEDYK.R.F<br>K.VLHMDQNPYY@GGESASITPLEDYK.R | Y38<br>Y38<br>Y38<br>Y38<br>Y38<br>Y38<br>Y39<br>Y39<br>Y39 | Regulates the GDP/GTP exchange reaction of Rab proteins.                                                                                                                                                                                                                                   |



|                                                                |        |                                                                                                                                                                                                                                                                                                                                                                                                                                            |                                                                                                                 |                                                                                                                                           |
|----------------------------------------------------------------|--------|--------------------------------------------------------------------------------------------------------------------------------------------------------------------------------------------------------------------------------------------------------------------------------------------------------------------------------------------------------------------------------------------------------------------------------------------|-----------------------------------------------------------------------------------------------------------------|-------------------------------------------------------------------------------------------------------------------------------------------|
| Ras GTPase-activating-like protein -- IQGAP1                   | Q9JKF1 | L.RSPDVGLY@GVIPEC*GETY.Q<br>L.SALRSPDVGLY@GVIPEC*GETY.Q<br>L.VKLQTTY@SAL.N                                                                                                                                                                                                                                                                                                                                                                 | Y654<br>Y654<br>Y1510                                                                                           | Binds to activated CDC42 but does not stimulate its GTPase activity. Associates with calmodulin. Could serve as an assembly scaffold.     |
| Ras and Rab interactor 1                                       | Q921Q7 | K.EKPSTDPLY@DTPDTR.G                                                                                                                                                                                                                                                                                                                                                                                                                       | Y35                                                                                                             | Alternative Name: Ras interaction/interference protein 1. Can affect Ras signaling at different levels.                                   |
| Rho-GTPase-activating protein 12                               | Q8C0D4 | R.AT@TPPNQGRPDS@PVY@ANLQELK.I<br>R.ATT@PPNQGRPDS@PVY@ANLQELK.I                                                                                                                                                                                                                                                                                                                                                                             | Y241<br>Y241                                                                                                    | A Rho/Rac/Cdc42-like GTPase activating (RhoGAP) protein.                                                                                  |
| Rho/rac guanine nucleotide exchange factor (GEF) 2 -- ARHGEF2  | Q923E0 | R.RRS@LPAGDALY@LSFNPPQPSR.G<br>R.SLPAGDALY@LSFNPPQPSR.G                                                                                                                                                                                                                                                                                                                                                                                    | Y893<br>Y893                                                                                                    | Guanine nucleotide exchange factor, Rac/Rho.                                                                                              |
| TBC1 domain family member 15                                   | Q9CXF4 | K.SLSQSFENLLDEPAY@GLIQK.I                                                                                                                                                                                                                                                                                                                                                                                                                  | Y215                                                                                                            | May act as a GTPase activating protein for Rab family protein(s). Contains 1 Rab-GAP TBC domain.                                          |
| <b>SIGNALING: OTHER</b>                                        |        |                                                                                                                                                                                                                                                                                                                                                                                                                                            |                                                                                                                 |                                                                                                                                           |
| 53BP2: Apoptosis stimulating of p53 protein 2 [fragment]       | Q8CG79 | R.KPQTVASSIY@SMYTQQQAPGK.N                                                                                                                                                                                                                                                                                                                                                                                                                 | Y569                                                                                                            |                                                                                                                                           |
| Ankyrin repeat and SAM domain containing protein 1 -- ANKS1    | P59672 | L.ILHFDTHADEEGPY@EALY.N<br>L.AVRPRIQSSAPQEEEEHPY@EL.L<br>L.AVRPRIQSSAPQEEEEHPY@ELL.L<br>R.IQSSAPQEEEEHPY@ELLLTAETK.K<br>R.IQSSAPQEEEEHPY@ELLLTAETK.L                                                                                                                                                                                                                                                                                       | Y377<br>Y471<br>Y471<br>Y471<br>Y471                                                                            | Phosphorylated in response to EGF and PDGF. Contains seven ankyrin repeats and two sterile alpha motif domains. Alternative name is Odin. |
| Annexin A1                                                     | P10107 | R.ALY@EAGER.R<br>R.ALY@EAGERR.K                                                                                                                                                                                                                                                                                                                                                                                                            | Y206<br>Y206                                                                                                    | Alternative Names: Calpactin II, Lipocortin I.                                                                                            |
| Annexin A2                                                     | P07356 | C.KLSLEGDHTPPSAY@GSVKPY.T<br>K.LSLEGDHTPPSAY@GSVKPYTNFDAER.D<br>L.SLEGDHTPPSAY@GSVKPY.T<br><br>K.SYSPY@DMLESIK.K<br>K.SYSPY@DMLESIKK.E<br>F.ADRLY@DSM.K<br>L.YFADRLY@DSM#.K<br>L.YFADRLY@DSM.K<br>Y.FADRLY@DSM.K<br>K.SLY@YIQQDTK.G<br>K.SLY@YIQQDTK.G<br>K.SLY@Y@YIQQDTK.G                                                                                                                                                                | Y23<br>Y23<br>Y23<br><br>Y237<br>Y237<br>Y274<br>Y274<br>Y274<br>Y274<br>Y315<br>Y316<br>Y315,Y316              | Alternative Names: Calpactin I, Lipocortin II.                                                                                            |
| Annexin A5                                                     | P48036 | R.SIPAYLAETLY@YAMK.G<br>K.NFATSLY@SMIK.G                                                                                                                                                                                                                                                                                                                                                                                                   | Y254<br>Y295                                                                                                    |                                                                                                                                           |
| Annexin A6                                                     | P14824 | R.GSVHDFPEFDANQDAEALY@TAM#.K<br>R.GSVHDFPEFDANQDAEALY@TAMK.G<br><br>Y.RGSVHDFPEFDANQDAEALY@TAM#.K<br>Y.RGSVHDFPEFDANQDAEALY@TAM.K                                                                                                                                                                                                                                                                                                          | Y29<br>Y29<br><br>Y29<br>Y29                                                                                    |                                                                                                                                           |
| Annexin A11                                                    | P97384 | K.TPVLFDVY@EIKEAIK.G                                                                                                                                                                                                                                                                                                                                                                                                                       | Y277                                                                                                            |                                                                                                                                           |
| Cell division cycle and apoptosis regulator protein 1 -- CARP1 | Q8CH18 | R.VLVEATY@NPNMPFK.W<br>R.VLVEATY@NPNMPFKWNAQR.I                                                                                                                                                                                                                                                                                                                                                                                            | Y189<br>Y189                                                                                                    | CARP-1 promotes apoptosis by activating p38 MAPK and caspase-9. Rishi AK, et al. J Biol Chem 2006 Mar 16                                  |
| Caveolin-1                                                     | P49817 | K.YVDSEGHLY@TVPIR.E                                                                                                                                                                                                                                                                                                                                                                                                                        | Y14                                                                                                             |                                                                                                                                           |
| Proto-oncogene c-Crk                                           | Q64010 | Q.KRVPNAY@DKTALA                                                                                                                                                                                                                                                                                                                                                                                                                           | Y251                                                                                                            | Site lies between the two SH3 domains                                                                                                     |
| Cyclin-dependent kinases regulatory subunit 2                  | P56390 | Y.SDKYFDEHY@EY.R<br>Y.YSDKYFDEHY@EY.R                                                                                                                                                                                                                                                                                                                                                                                                      | Y17<br>Y17                                                                                                      | Binds to the catalytic subunit of the cyclin dependent kinases and is essential for their biological function.                            |
| Docking protein 1 -- Dok1                                      | P97465 | K.TVPPVPQDPLGSPALY@AEPLDSL.R<br>R.IPPGPSQDSVY@SDPLGSPAGAGEGVHSK.K<br>K.KPLY@WDLY@GHVQQQLLK.T<br>K.KPLYWDLY@GHVQQQLLK.T<br>K.LTDSKEDIY@DEPEGLAPAPPR.G<br><br>K.TKLTDSKEDIY@DEPEGLAPAPPR.G<br>K.TKLTDS*KEDIY@DEPEGLAPAPPRGLYDLPQEP<br>R.D<br>L.KTKLTDSKEDIY@DEPEGLAPAPPRGLY.D<br>L.LTKLTDSKEDIY@DEPEGLAPAPPRGLY.D<br>K.LTDSKEDIY@DEPEGLAPAPPRGLY@DLPQEP.R<br>D<br>K.LTDS*KEDIYDEPEGLAPAPPRGLY@DLPQEP.R<br>D<br>R.LKEEGY@ELPY@NPATDDYAVPPPR.S | Y295<br>Y314<br>Y336,Y340<br>Y340<br>Y361<br><br>Y361<br>Y361<br>Y361<br>Y361<br>Y361,Y376<br>Y376<br>Y397,Y401 |                                                                                                                                           |

|                                                                              |        |                                                                                                                                                                                                                                                          |                                                                             |                                                                                                                                                            |
|------------------------------------------------------------------------------|--------|----------------------------------------------------------------------------------------------------------------------------------------------------------------------------------------------------------------------------------------------------------|-----------------------------------------------------------------------------|------------------------------------------------------------------------------------------------------------------------------------------------------------|
|                                                                              |        | R.LKEEGYELPY@NPAT@DDYAVPPPR.S<br>R.LKEEGYELPY@NPATDDYAVPPPR.S<br>R.LKEEGYELPYNPATDDY@AVPPPR.S<br>R.LKEEGY@ELPYNPATDDY@AVPPPR.S<br>R.LKEEGYELPY@NPATDDY@AVPPPR.S<br>R.LKEEGYELPY@NPATDDY@AVPPPR.S@PK.P<br>F.SSDTALY@SQVQKSGTSGAW.D<br>K.GFSSDTALY@SQVQK.S | Y401<br>Y401<br>Y408<br>Y397,Y408<br>Y401,Y408<br>Y401,Y408<br>Y450<br>Y450 |                                                                                                                                                            |
| Epidermal growth factor receptor kinase substrate 8 -- EPS8                  | Q08509 | R.LSTEHSNVSDY@PPADGYAYSSSMYHR.G                                                                                                                                                                                                                          | Y484                                                                        | Contains 1 PH domain. 1 SH3 domain. Phosphorylated by several receptor tyrosine kinases.                                                                   |
| Hepatocyte growth factor-regulated tyrosine kinase substrate -- HGS/ Hrs     | Q99LI8 | R.VC*EPC*Y@EQLNK.K                                                                                                                                                                                                                                       | Y216                                                                        |                                                                                                                                                            |
| Insulin receptor substrate 1 -- IRS-1                                        | P35569 | R.AASEAGGPAREY@YENEKK.W                                                                                                                                                                                                                                  | Y46                                                                         | Major substrate of the insulin receptor kinase. Contains multiple tyrosine phosphorylation motifs that serve as docking sites for SH2-containing proteins. |
| Insulin receptor substrate 2 -- IRS-2                                        | P81122 | K.VAYNPYPEDY@GDIEIGSHK.S                                                                                                                                                                                                                                 | Y628                                                                        |                                                                                                                                                            |
| Kin of IRRE-like protein 1 precursor -- KIRREL                               | Q80W68 | R.C*DTIDTREEY@EMKDPTNGY@YNVR.A<br>R.C*DTIDT@REEYEMKDPTNGY@YNVR.A<br>R.EEYEMKDPTNGY@YNVR.A<br>Y.RLGYPOAPPSGLERTPY@EAY@DPIGKY.A                                                                                                                            | Y628,Y637<br>Y637<br>Y637<br>Y753,Y756                                      | Signaling protein that needs the presence of TEC kinases to fully trans-activate the transcription factor AP-1. Alternative Name: Nephrin-like protein 1.  |
| Latrophilin-2                                                                | Q8JZZ7 | R.SENEDIY@YK.S<br>R.GNSDGY@IIPINK.E                                                                                                                                                                                                                      | Y838<br>Y865                                                                | Latrophilins are members of the secretin family of G protein-coupled receptors. Sites are in a predicted cytoplasmic region.                               |
| Non-catalytic region of tyrosine kinase adaptor protein 1 -- NCK1            | Q99M51 | K.PSVPDTASPADDSFVDPGERLY@DLNMPAFVK.F<br>K.RKPS@VPDTASPADDSFVDPGERLY@DLNMPAFVK.F<br>K.RKPSVPDTASPADDSFVDPGERLY@DLNMPAFVK.F<br>R.KPSVPDTASPADDSFVDPGERLY@DLNMPAFVK.F                                                                                       | Y105<br>Y105<br>Y105<br>Y105                                                | Site falls between first two SH3 domains.                                                                                                                  |
| Notchless homolog 1                                                          | Q8VEJ4 | K.LATDLPGHADEVY@AVDWSPDGQR.V                                                                                                                                                                                                                             | Y459                                                                        | Site near the C-terminus in the last WD repeat. Dros. homolog binds Notch and acts as a neg. regulator of notch signaling.                                 |
| Phosphatidylinositol 3-kinase regulatory alpha subunit -- p85 alpha          | P26450 | K.SREYDRLY@EEYTR.T<br>K.LNEWLGNENTEDQY@SLVEDDEDLPHHDEK.T                                                                                                                                                                                                 | Y467<br>Y607                                                                | Acts as an adaptor. Binds to activated protein-Tyr kinases, through its SH2 domain, and mediates association of the p110 catalytic unit.                   |
| Phosphatidylinositol 3-kinase, regulatory subunit, polypeptide 2 -- p85 beta | O08908 | R.EYDQLY@EEYTR.T                                                                                                                                                                                                                                         | Y458                                                                        |                                                                                                                                                            |
| Phospholipase C, gamma 1                                                     | Q6P1G1 | K.IGTAEPDY@GALY@EGRNPGFYVEANPMPTFK.C<br>K.IGTAEPDY@GALY@EGRNPGFY@VEANPMPTFK.C<br>K.IGTAEPDY@GALY@EGRNPGFYVEANPMPTFK.C                                                                                                                                    | Y771,Y775<br>Y775,Y783<br>Y775                                              |                                                                                                                                                            |
| Protein Wnt-2b precursor                                                     | O70283 | K.GTDGG*EIMCCGRGY@DTTR.V                                                                                                                                                                                                                                 | Y342                                                                        | Ligand for members of the frizzled family of seven transmembrane receptors.                                                                                |
| Guanine nucleotide-binding protein beta subunit 2-like 1 -- RACK1            | P68040 | K.HLY@TLDGGDIINALC*FSPNR.Y<br>L.WDLNEGKHL@TLDGGDIINALC<br>W.DLNEGKHL@TLDGGDIINALC<br>W.DLNEGKHL@TLDGGDIINALC*F.S                                                                                                                                         | Y227<br>Y227<br>Y227                                                        | Receptor of activated protein kinase C 1. Acts to anchor activated PKC to the cytoskeleton. Contains 7 WD domains.                                         |
| Retinoic acid-induced protein 3                                              | Q8BHL4 | F.SIPRAQAPASPY@NDY@EGRKGD.S.-<br>F.SIPRAQAPASPY@NDY@EGRKGD.S^.-                                                                                                                                                                                          | Y346,Y349<br>Y346                                                           | Retinoic acid-inducible GPCR. Site near C-terminus.                                                                                                        |
| SH2 domain-containing adapter protein B -- SHB                               | Q6PD21 | R.DFEDPY@NGPGSSLR.K                                                                                                                                                                                                                                      | Y95                                                                         | Adapter protein which links activated receptors to downstream signaling components.                                                                        |
| SHC transforming protein 1 -- SHC1                                           | P98083 | R.ELFDDPSY@VNIQNLK.A<br>R.MAGFDGSAWDEEEEEPPDHQY@Y@NDFPGKEP<br>PLGGVDMR.L<br>R.MAGFDGSAWDEEEEEPPDHQY@Y@NDFPGKEP<br>PLGGVDMR.L<br>F.DGSAWDEEEEEPPDHQY@Y@NDFPGKEPPLGG<br>VDMR                                                                               | Y423<br>Y349,Y350<br>Y349,Y350<br>Y349,Y350                                 |                                                                                                                                                            |
| SHC SH2 domain-binding protein 1                                             | Q9Z179 | R.SWDEEEDEY@DYFVR.C                                                                                                                                                                                                                                      | Y217                                                                        | Interacts directly with isoform p52shc of SHC1 via its SH2 domain.                                                                                         |
| SH2-containing inositol 5-phosphatase 2 -- SHIP2                             | Q9JLL7 | R.FSEEEISFPPTY@RYER.G<br>K.NSFNNPAY@YVLEGVPHQLLPLEPPSLAR.A                                                                                                                                                                                               | Y662<br>Y987                                                                | SH2-containing inositol phosphatase. Recruited to activated receptor complexes.                                                                            |
| Sorbin and SH3 domain-containing protein 1 -- SORBS1                         | Q62417 | K.TPVDYIDL@SSSPSR.S                                                                                                                                                                                                                                      | Y1198                                                                       | Contains 3 SH3 domains. Site lies between last two SH3 domains. Links CBL to the insulin receptor.                                                         |
| Signal transducing adapter molecule 2 -- STAM-2                              | O88811 | K.LVNEAPVY@SVYS@K.L<br>K.LVNEAPVY@SVYS@K.L<br>Y.NKLVNEAPVY@SVY.S                                                                                                                                                                                         | Y371<br>Y371<br>Y371                                                        | Adaptor protein involved in the downstream signaling of cytokine receptors. Contain a SH3 domain and ITAM motif. Alternative Names: HRS binding protein.   |
| Signal transducer and activator of transcription 3 - STAT3                   | P42227 | R.QFLAPWIESQDWAY@AASK.E<br>K.YC*RPESQEHPEADPGSAAPY@LK.T                                                                                                                                                                                                  | Y45<br>Y705                                                                 |                                                                                                                                                            |

|                                                                                                                                         |        |                                                                                                                                                                                                                                                                                                                        |                                                                                                               |                                                                                                                                                                                                                                                                                                                                 |
|-----------------------------------------------------------------------------------------------------------------------------------------|--------|------------------------------------------------------------------------------------------------------------------------------------------------------------------------------------------------------------------------------------------------------------------------------------------------------------------------|---------------------------------------------------------------------------------------------------------------|---------------------------------------------------------------------------------------------------------------------------------------------------------------------------------------------------------------------------------------------------------------------------------------------------------------------------------|
| STRAP: serine/threonine kinase receptor associated protein                                                                              | Q8BP89 | K.IGFPETAEEEEIEIASSENSDSIY@SSTPEVK.A<br>K.IGFPETAEEEEIEIASSENSDSIY@SSTPEVK.A.-                                                                                                                                                                                                                                         | Y342<br>Y342                                                                                                  | This protein is largely composed of 6 WD repeats. The site is near the C-terminus, beyond the WDs.                                                                                                                                                                                                                              |
| Striatin                                                                                                                                | O55106 | K.STSLDVEPIY@TFR.A<br>W.NLQKTAPAKKSTSLDVEPIY@TFR                                                                                                                                                                                                                                                                       | Y510<br>Y510                                                                                                  | Binds calmodulin in a calcium dependent manner. May function as scaffolding or signaling protein. Belongs to the WD-repeat striatin family.                                                                                                                                                                                     |
| Striatin-3                                                                                                                              | Q9ERG2 | K.SASLDVEPIY@TFR.A                                                                                                                                                                                                                                                                                                     | Y526                                                                                                          | Belongs to the WD-repeat striatin family.                                                                                                                                                                                                                                                                                       |
| hypothetical SH3/Phox-like/Src homology 3 (SH3) domain profile/Proline-rich region profile/PX domain profile containing protein -- TKS4 | Q3TB89 | R.VTWSSGATEAIY@R.R<br>K.TEPAQSEDHVDIY@NLR.S                                                                                                                                                                                                                                                                            | Y42<br>Y661                                                                                                   | Related to mouse TKS5 FISH protein. Y42 is in the N-terminal PX (phox) domain.                                                                                                                                                                                                                                                  |
| <b>ADHESION: CELL/ECM</b>                                                                                                               |        |                                                                                                                                                                                                                                                                                                                        |                                                                                                               |                                                                                                                                                                                                                                                                                                                                 |
| Bystin                                                                                                                                  | O54825 | R.GREVEEEEEY@VGPR.L                                                                                                                                                                                                                                                                                                    | Y48                                                                                                           | Could be involved in a cell adhesion molecule complex that mediates an initial attachment of the blastocyst to uterine epithelial cells.                                                                                                                                                                                        |
| CRK-associated substrate -- p130cas                                                                                                     | Q61140 | -.MTVPNVLAKALY@DNVAESPDELSFR.K<br>K.ALY@DNVAESPDELSFR.K<br>Y.VYEAAQTEQDEY@DTPRHLL<br>R.HLLAPGQDIY@DVPPVR.G<br><br>R.GLLPNQYQEVY@DTPPMAVK.G<br><br>K.GPNGRDPLLDVY@DVPPSVSK.D<br>K.GLLSSSHSVY@DVPPSVSK.D<br>R.RPGGTLY@DVPR.E<br>R.VLPPEVADGSDVDDGVY@AVPPPAER.E<br>R.ERVLPEVADGSDVDDGVY@AVPPPAER.E<br>L.SRQLQKMEDVY@QTL.V | Y12<br>Y12<br>Y238<br>Y253<br><br>Y271<br><br>Y291<br>Y310<br>Y391<br>Y414<br>Y414<br>Y556                    | Site is in the SH3 domain.<br>Substrate domain YxxP site 6.<br>Substrate domain YxxP site 7.<br><br>Substrate domain YxxP site 8.<br><br>Substrate domain YxxP site 9.<br>Substrate domain YxxP site 10.<br>Substrate domain YxxP site 14.<br>Substrate domain YxxP site 15.<br><br>Site is C-terminal to the substrate domain. |
| Lipoma-preferred partner homolog -- LPP                                                                                                 | Q8BFW7 | H.YMAGPSSGQIY@GPGPRGY.N<br>Y.MAGPSSGQIY@GPGPRGY.N<br><br>M.AGPSSGQIY@GPGPRGY.N<br>R.YYEPY@YAAGPSYGGR.S<br><br>Y.TSNQGRYYEPY@YAAGPSY.G<br>R.YYEPY@Y@AAGPSYGGR.S<br>R.YYEPY@AAGPSYGGR.S<br><br>K.KMLY@DMENPPADDYFGR.C<br><br>K.MLY@DMENPPADDYFGR.C<br>K.KMLYDMENPPADDY@FGR.C<br><br>K.MLYDMENPPADDY@FGR.C                | Y245<br>Y245<br><br>Y245<br>Y301<br><br>Y301<br>Y301.Y302<br>Y302<br><br>Y403<br><br>Y403<br>Y413<br><br>Y413 |                                                                                                                                                                                                                                                                                                                                 |
| Paxillin                                                                                                                                | Q8VI36 | F.LSEEPY@SYPTGNHTY.Q<br>R.AGEEHVY@SFPNK.Q<br><br>R.AGEEHVY@SFPNKQK.S                                                                                                                                                                                                                                                   | Y31<br>Y118<br><br>Y118                                                                                       |                                                                                                                                                                                                                                                                                                                                 |
| Syndecan-4 precursor                                                                                                                    | O35988 | Y.KKAPTNEFY@A.-                                                                                                                                                                                                                                                                                                        | Y197                                                                                                          |                                                                                                                                                                                                                                                                                                                                 |
| Talin 1                                                                                                                                 | P26039 | K.TM#QFEPSTMVY@DAC*R.M<br>K.TM#QFEPSTMVY@DAC*R.M<br><br>M.QFEPSTMVY@DAC*RM.I<br>K.ALDY@YMLR.N<br>K.ALDY@YMLR.N<br>K.ALDY@MLR.N<br>K.LLGEIAQGNENY@AGIAAR.D<br>K.TLAESALQLLY@TAK.E                                                                                                                                       | Y26<br>Y26<br><br>Y26<br>Y70<br>Y70<br>Y71<br>Y1116<br>Y1777                                                  |                                                                                                                                                                                                                                                                                                                                 |
| Tensin 2                                                                                                                                | Q8CJ95 | R.YGHSGYPALVTY@GYGGAVPSYC*PAYGR.A                                                                                                                                                                                                                                                                                      | Y766                                                                                                          |                                                                                                                                                                                                                                                                                                                                 |
| Tensin 3                                                                                                                                | Q5SSZ5 | K.LYQAMQPVYTSGIY@NVGSENPSR.I<br><br>L.HTQGPVDGSLY@AKVR.K<br>R.KPSAPTPVQAY@GQSNY@STQTWVR.Q<br>R.KPSAPTPVQAYGQSNY@STQTWVR.Q                                                                                                                                                                                              | Y216<br><br>Y354<br>Y579.Y584<br>Y584                                                                         |                                                                                                                                                                                                                                                                                                                                 |
| Vinculin                                                                                                                                | Q64727 | K.LVQAAQMLQSDPY@SVPAR.D<br><br>K.LVQAAQMLQSDPY@SVPARDYLIDGSR.G<br>L.QSDPY@SVPARDY.L<br>Q.MLQSDPY@SVPARDY.L<br>R.ILLRNPGQAAY@EHFETMK.N                                                                                                                                                                                  | Y99<br><br>Y99<br>Y99<br>Y99<br>Y691                                                                          |                                                                                                                                                                                                                                                                                                                                 |
| <b>ADHESION: CELL/CELL</b>                                                                                                              |        |                                                                                                                                                                                                                                                                                                                        |                                                                                                               |                                                                                                                                                                                                                                                                                                                                 |

|                                                                        |        |                                                                                                                                                                                                                                                                                                                                                                                     |                                                                                  |                                                                                                                                                                                                                                            |
|------------------------------------------------------------------------|--------|-------------------------------------------------------------------------------------------------------------------------------------------------------------------------------------------------------------------------------------------------------------------------------------------------------------------------------------------------------------------------------------|----------------------------------------------------------------------------------|--------------------------------------------------------------------------------------------------------------------------------------------------------------------------------------------------------------------------------------------|
| Catenin delta-1 -- p120 catenin                                        | P30999 | K.LNGPQDHNHLLY@STIPR.M<br>R.HYEDGYPGSDNY@GSLSR.V<br>R.FHPEPYGLEDDQRS@DDLDY@GMMSDYGTAR.R<br>R.FHPEPYGLEDDQRS@MGYDDL@GMMS@DYGTAR.R<br>R.FHPEPYGLEDDQRS@MGYDDL@GMMS@DYG TAR.R<br>R.FHPEPYGLEDDQRS@MGYDDL@GMMS@DYG TAR.R<br>R.FHPEPYGLEDDQRS@MGYDDL@GMMSDYGTAR.R<br>R.SMGYDDL@GMMSDYGTAR.R<br>R.SMGYDDL@GMMSDYGTAR.R<br>R.SYEDMIGEEVPPDQY@YWAPLAQHER.G<br>R.SYEDMIGEEVPPDQY@WAPLAQHER.G | Y96<br>Y228<br>Y291,Y296<br>Y296<br>Y296<br>Y296<br>Y296<br>Y302<br>Y334<br>Y335 |                                                                                                                                                                                                                                            |
| Plakophilin-4                                                          | Q68FH0 | R.TVHMDQFGQQY@DIY@ER.M<br>R.TVHMDQFGQQYDIY@ER.M<br>L.RSAVSPDLHITPIY@EGRT@YY.S<br>R.SAVSPDLHITPIY@EGRT@YVSPVYR.S<br>R.SAVS@PDLHITPIY@EGRT@YVSPVYR.S                                                                                                                                                                                                                                  | Y368,Y371<br>Y371<br>Y414<br>Y414<br>Y414                                        | Belongs to the beta-catenin family.                                                                                                                                                                                                        |
| Scavenger receptor class F member 2 precursor                          | P59222 | R.SASSVEGSPGALY@AR.V                                                                                                                                                                                                                                                                                                                                                                | Y615                                                                             |                                                                                                                                                                                                                                            |
| Tight junction protein ZO-1                                            | P39447 | R.LSYLSAPGSEY@SMYSTDSR.H<br>R.HEEQPAPAY@EVHNR.Y<br>L.RHEEQPAPAY@EVHNR.Y<br>R.YRPEAQPY@SSTGPK.S<br>Y.RPEAQPY@SSTGPKSSEPKQY.F<br>R.SNHY@DPEEDEEYR.K<br>R.SNHYDPEEDEEY@YR.K<br>R.SNHYDPEEDEEY@YR.K                                                                                                                                                                                     | Y830<br>Y1164<br>Y1164<br>Y1177<br>Y1177<br>Y1345<br>Y1353<br>Y1353              | MAGUK family. Contains 1 guanylate kinase-like domain, 3 PDZ (DHR) domains, 1 SH3 domain.                                                                                                                                                  |
| Tight junction protein ZO-2                                            | Q9Z0U1 | R.SYHEAY@EPDY@GGYSPSYDRR.A<br>R.SYHEAY@EPDYGGY@SPSYDRR.A<br>R.SYHEAY@EPDYGGYSPSYDRR.A<br>R.SYHEAY@EPDY@GGYSPSYDRR.A<br>R.VFLRPSPEDEAIY@GPNTK.M<br>F.LRPSPEDEAIY@GPNTK.MVRF.K<br>R.GLVREDAVLY@LLEIPKGETVTILAQRSR.A<br>R.IEIAQKHPDIY@AVPIK.A                                                                                                                                          | Y230, Y234<br>Y230, Y238<br>Y230<br>Y234<br>Y486<br>Y486<br>Y554<br>Y1095        |                                                                                                                                                                                                                                            |
| <b>CYTOSKELETON: ACTIN-ASSOCIATED</b>                                  |        |                                                                                                                                                                                                                                                                                                                                                                                     |                                                                                  |                                                                                                                                                                                                                                            |
| <b>Actins and actin-related proteins; Regulators of actin assembly</b> |        |                                                                                                                                                                                                                                                                                                                                                                                     |                                                                                  |                                                                                                                                                                                                                                            |
| Actin, alpha skeletal muscle (Beta-actin) (Gamma-actin)                | P68134 | M.VGMGQKDSY@VGDEAQSKRGL.T<br>K.IWHHTFY@NELR.V<br>K.EKLC*Y@VALDFENEM#ATAASSSSLEK.S                                                                                                                                                                                                                                                                                                   | Y55<br>Y93<br>Y220                                                               | Peptide conserved in alpha-cardiac actin (P68033); gamma-enteric smooth muscle actin (P63268); Beta-actin (P70514); Gamma-actin (P63260)<br>Peptide conserved in alpha cardiac-actin (P68033); ; Beta-actin (P70514); Gamma-actin (P63260) |
| Actin, cytoplasmic 1 (Beta-actin)                                      | P70514 | K.EKLC*Y@VALDFEQEMATAASSSSLEK.S                                                                                                                                                                                                                                                                                                                                                     | Y218                                                                             |                                                                                                                                                                                                                                            |
| Beta-centractin                                                        | Q8R5C5 | R.TTGVDLSDGDVTHAVPIY@EGFAMPHSIMR.V                                                                                                                                                                                                                                                                                                                                                  | Y171                                                                             | Part of a complex involved in microtubule based vesicle motility. Associated with the centrosome. Belongs to the actin family, ARP1 subfamily.                                                                                             |
| Actin-like protein 2 -- Arp2                                           | P61161 | K.HLWDY@TFGPEK.L<br>K.HLWDY@TFGPEKLNIDTR.N                                                                                                                                                                                                                                                                                                                                          | Y91<br>Y91                                                                       | Actin-related protein. Part of a complex implicated in the control of actin polymerization in cells.                                                                                                                                       |
| Actin-like protein 3 - Arp3                                            | Q99JY9 | L.RAEPEDHY@F.L                                                                                                                                                                                                                                                                                                                                                                      | Y108                                                                             |                                                                                                                                                                                                                                            |
| Actin-related protein 2/3 complex subunit 3 -- p21-ARC                 | Q9JM76 | F.KGPAPRETKDIDVDEAIY@Y.F<br>F.KGPAPRETKDIDVDEAIY@Y.F.K<br>K.DTIDVDEAIY@Y.F.K<br>Q.FKGPAPRETKDIDVDEAIY@Y.F                                                                                                                                                                                                                                                                           | Y46<br>Y46<br>Y46<br>Y46                                                         | Part of a complex implicated in the control of actin polymerization in cells.                                                                                                                                                              |
| Adenylyl cyclase-associated protein 1 -- CAP1                          | P40124 | R.LEAVSHTSDMHC*GY@GDSPSK.G                                                                                                                                                                                                                                                                                                                                                          | Y30                                                                              | Actin monomer binding protein. Promotes rapid actin dynamics in conjunction with ADF/cofilin.                                                                                                                                              |
| Cofilin-1 non-muscle isoform                                           | P18760 | K.HELQANC*Y@EEVKDR.C<br>K.LTGIKHELQANC*Y@EEVKDR.C                                                                                                                                                                                                                                                                                                                                   | Y139<br>Y139                                                                     |                                                                                                                                                                                                                                            |
| Src substrate cortactin                                                | Q60598 | F.KAEPYRGSEPEPEY@SIEAAGIPEAGSQQL.T<br>L.TYTSEPVEY@ETTEAPGHY.Q<br>Y.TSEPVEY@ETTEAPGHY.Q                                                                                                                                                                                                                                                                                              | Y442<br>Y466<br>Y466                                                             |                                                                                                                                                                                                                                            |
| Cytoplasmic FMR1 interacting protein 1                                 | Q7TMB8 | K.C*NEQPNRVEIY@EK.T                                                                                                                                                                                                                                                                                                                                                                 | Y108                                                                             | Alternative name: Specifically Rac-associated protein (Sra-1). Essential component of a WAVE2- and Abi-1-containing complex linking Rac to site-directed actin assembly. Peptide also in Cytoplasmic FMR1 interacting protein 2 (Q5SQX6).  |
| Coronin-1C                                                             | Q9WUM4 | R.YFEITDESPY@VHYLNTFSSKEPQR.G                                                                                                                                                                                                                                                                                                                                                       | Y301                                                                             | Contains 4 WD repeats. Site in fourth repeat.                                                                                                                                                                                              |
| N-WASP: Neural Wiskott-Aldrich syndrome protein                        | Q91YD9 | K.VIY@DFIEK.T                                                                                                                                                                                                                                                                                                                                                                       | Y253                                                                             | Regulates actin polymerization by stimulating the actin-nucleating activity of the Arp2/3 complex.                                                                                                                                         |

|                                                          |         |                                                                                                           |                              |                                                                                                                                                                                                                                                                   |
|----------------------------------------------------------|---------|-----------------------------------------------------------------------------------------------------------|------------------------------|-------------------------------------------------------------------------------------------------------------------------------------------------------------------------------------------------------------------------------------------------------------------|
| Twinfilin-1                                              | Q91YR1  | R.KIEIDNGDELTAFLY@DEVHPK.Q                                                                                | Y309                         | Twinfilins are composed of two ADF/cofilin-like repeats (ADF-H domains).                                                                                                                                                                                          |
| Twinfilin-2                                              | Q9Z0P5  | K.KIEIGDGAELTAEFLY@DEVHPK.Q                                                                               | Y309                         |                                                                                                                                                                                                                                                                   |
| Vasodilator-stimulated phosphoprotein -- VASP            | P70460  | F.SRVQIY@HNPTANSF.R<br>R.VQIY@HNPTANSF.R.V                                                                | Y39<br>Y39                   | Actin- and profilin-binding microfilament-associated protein.                                                                                                                                                                                                     |
| WD-repeat protein 1 -- Actin interacting protein 1, AIP1 | O88342  | F.IYDGGTGEKVC*ALGESKAHDGGIY@AISW.S<br>K.AHDGGIY@AISWSPDSTHLLSASGDK.T<br>K.AHDGGIY@AISWSPDSTHLLSASGDKTSK.I | Y237<br>Y237<br>Y237         | Induces disassembly of actin filaments in conjunction with ADF/cofilin family proteins. Contains 11 WD repeats.                                                                                                                                                   |
| <b>Other actin-associated proteins</b>                   |         |                                                                                                           |                              |                                                                                                                                                                                                                                                                   |
| Alpha-actinin 1                                          | Q7TPR4  | R.HRPELIDY@GK.L<br>K.AIM#TYVSSFY@HAFSGAQK.A<br><br>K.AIMTYVSSFY@HAFSGAQK.A                                | Y193<br>Y246<br><br>Y246     |                                                                                                                                                                                                                                                                   |
| Anillin                                                  | Q8K298  | R.AESADSLGSEDRDLY@SIDAYR.S                                                                                | Y666                         | A substrate of anaphase-promoting complex/cyclosome that controls spatial contractility of myosin during late cytokinesis.                                                                                                                                        |
| Calponin-3                                               | Q9DAW9  | Y.HGEYDDY@PREY.Q<br>Y.HGEYDDY@PREY.Q@QYGDQIDY.-                                                           | Y316<br>Y320                 | Thin filament-associated protein implicated in the regulation and modulation of smooth muscle contraction. Capable of binding to actin, calmodulin, troponin C and tropomyosin.                                                                                   |
| Filamin-B                                                | Q80X90  | K.GFLDGVY@SFEYYPSTPGK.Y<br>K.QKGFLDGVY@SFEYYPSTPGK.Y<br>M.KSRMDGT@AC*SY.T<br>R.MDGT@AC*SYPLK.A            | Y511<br>Y511<br>Y704<br>Y704 |                                                                                                                                                                                                                                                                   |
| Girdin                                                   | Q5SNZ0  | K.TEDAY@TISSAGKPTSTQK.I<br>L.RTGPQKTEDAY@TISSAGKPTSTQ.G                                                   | Y1739<br>Y1739               | Actin binding protein. Akt/PKB regulates actin organization and cell motility via Girdin/APE. 2005, Dev. Cell, 9, 389-402.                                                                                                                                        |
| LIM and SH3 domain protein 1 -- LASP-1                   | Q61792  | H.HIPTSAPVY@QQPQQQM.T                                                                                     | Y173                         | LIM protein subfamily, characterized by a LIM motif and SH3 domain. An actin-binding protein, may play a role in cytoskeletal organization.                                                                                                                       |
| Moesin                                                   | P26041  | K.EGILNDDIY@C*PPETA/LLASAVQSK.Y                                                                           | Y115                         | "Membrane-organizing extension spike protein". Site is in the FERM domain. Actin-binding protein. Plays a role in the formation of microvilli-like structures.                                                                                                    |
| Myosin-9                                                 | Q8VDD5  | R.HEMPPHIY@AITDTAYR.S                                                                                     | Y150                         |                                                                                                                                                                                                                                                                   |
| Myosin-10                                                | Q61879  | R.AVIY@NPATQADWTAK.K<br>Y.LFVDRAVIY@NPATQADW.T                                                            | Y22<br>Y22                   |                                                                                                                                                                                                                                                                   |
| PDZ and LIM domain protein 1                             | Q70400  | R.VITNQYNSPTGLY@SSENISFNNAVESK.T                                                                          | Y148                         | Associates with the actin stress fibers. May act as an adapter that brings other proteins (like kinases) to the cytoskeleton.                                                                                                                                     |
| Profilin-1                                               | P10924  | K.C*Y@EMASHLR.R                                                                                           | Y128                         |                                                                                                                                                                                                                                                                   |
| Profilin-2                                               | Q9J JV2 | K.SQGGEPTY@NVAVGR.A                                                                                       | Y98                          | Binds to actin and affects the structure of the cytoskeleton.                                                                                                                                                                                                     |
| Septin-2                                                 | P42208  | K.QQPTQFINPETPGY@VGFANLPNQVHR.K                                                                           | Y17                          | Involved in cytokinesis. Alternative Name: NEDD-5.                                                                                                                                                                                                                |
| Septin-7                                                 | Q55131  | K.NLEGY@VGFANLPNQVYR.K<br>R.KLAAVTY@NGVDNKN.N<br>R.KLAAVTY@NGVDNKNK.G                                     | Y29<br>Y318<br>Y318          |                                                                                                                                                                                                                                                                   |
| Synaptopodin                                             | Q8CC35  | R.TPPASLY@HGYPENGLRPEPTK.Q                                                                                | Y775                         | Actin-associated protein that may play a role in modulating actin-based shape and motility of dendritic spines and renal podocyte foot processes.                                                                                                                 |
| <b>CYTOSKELETON: MICROTUBULE-ASSOCIATED</b>              |         |                                                                                                           |                              |                                                                                                                                                                                                                                                                   |
| Tubulin alpha-1 chain                                    | P68369  | F.MVDNEAIY@DIC*RR.N<br>F.MVDNEAIY@DIC*.R<br>F.MVDNEAIY@DIC*RRNLDIERPTY.T                                  | Y210<br>Y210<br>Y210         | All peptides identical in alpha tubulins 2 (P05213), 3 (Q5FW91), 4 (P68368), 6 (P68373), 7 (P05214), and 8 (Q9JJZ2).                                                                                                                                              |
| Tubulin beta-3 chain                                     | Q9ERD7  | Y.C*IDNEALY@DIC*F.R<br>K.NSSY@FVEWIPNNVK.V                                                                | Y208<br>Y340                 | Peptide identical in beta tubulins 2 (Q3TG26), 2C (P68372), 4 (Q9D6F9), 5 (P99024), and 6 (Q922F4)<br>Peptide identical in Q9D6F9 P99024 Q922F4                                                                                                                   |
| CLIP-associating protein 2 -- CLASP2                     | Q8BRT1  | R.DYNPY@NYSDSISPFNK.S                                                                                     | Y1014                        | Clasps are CLIP-115 and -170 associating proteins involved in the regional regulation of microtubule dynamics in motile fibroblasts.                                                                                                                              |
| Dynein heavy chain, cytosolic                            | Q9JHU4  | R.YQVGVVHY@ELTEEEKFYR.N                                                                                   | Y1008                        | Acts as a motor for the intracellular retrograde motility of vesicles and organelles along microtubules.                                                                                                                                                          |
| Kinesin light chain 1                                    | O88447  | K.DGSFAFGEY@GGWYK.A<br>K.QKDGSAFGEY@GGWYK.A                                                               | Y444<br>Y444                 | Microtubule-associated force-producing protein that plays a role in organelle transport. Peptide identical in several Kinesin light chain 1 isoforms (Q7M703, Q7M701, Q7M700, Q7M6Z9, Q7M6Z8, Q7M6Z7, Q7M6Z6, Q7TNF4)                                             |
| Kinesin light chain 2                                    | Q91YS4  | R.DSAPYGEY@GSWYK.A                                                                                        | Y434                         |                                                                                                                                                                                                                                                                   |
| Kinesin-associated protein 3 -- KAP3                     | P70188  | R.PATAYGFRPDEPY@YYSFGSR.-<br>R.PATAYGFRPDEPY@YYSFGSR.-<br>R.PATAYGFRPDEPY@YYSFGSR.-                       | Y786<br>Y787<br>Y788         | Component of KIF3 motor involved in microtubule plus-end-directed translocation of membrane organelles. KAP3 may regulate the association of KIF3 (kinesin family protein 3) motor with its cargos. Phosphorylation by Src reduces binding affinity for RAP1GDS1. |

|                                                                  |                   |                                                                                                                                                                                                                                                                     |                                                                                           |                                                                                                                                                                                                                                                                                                           |
|------------------------------------------------------------------|-------------------|---------------------------------------------------------------------------------------------------------------------------------------------------------------------------------------------------------------------------------------------------------------------|-------------------------------------------------------------------------------------------|-----------------------------------------------------------------------------------------------------------------------------------------------------------------------------------------------------------------------------------------------------------------------------------------------------------|
| Kinesin family member 11                                         | Q6P9P6            | R.SPNEVY@TWEEDPLAGIIPR.T                                                                                                                                                                                                                                            | Y124                                                                                      | Alternative name: Kinesin-related mitotic motor protein (Q9Z1J0).                                                                                                                                                                                                                                         |
| Microtubule-associated protein 1B -- MAP 1B                      | P14873            | K.VLSPLRS@PPLLGSSEPY@EDFLSADSK.V<br>R.SPPLLGSSEPY@EDFLSADSK.V                                                                                                                                                                                                       | Y1405<br>Y1405                                                                            |                                                                                                                                                                                                                                                                                                           |
| Microtubule-associated protein 1B -- isoform                     | UPI0000021<br>C8B | R.RTHDVGYY@YEKTER.T                                                                                                                                                                                                                                                 | Y1901                                                                                     | Cannot be combined with P14873. In P14873, is HDVVRY. Two entries only have 7 different aa.                                                                                                                                                                                                               |
| Microtubule-associated protein 4 -- MAP 4                        | P27546            | F.TERDNPSSESY@GMLPC*DSF.A                                                                                                                                                                                                                                           | Y176                                                                                      | May play a role in microtubule stabilization as well as promoting microtubule assembly.                                                                                                                                                                                                                   |
| Nuclear distribution protein nudE homolog 1 -- NudE              | Q9CZA6            | R.NFMY@DQSPSR.T                                                                                                                                                                                                                                                     | Y279                                                                                      | Localizes to the interphase centrosome and to the mitotic spindle. Required for centrosome duplication and formation and function of the mitotic spindle. Concentrates at the plus ends of microtubules coincident with kinetochores in metaphase and anaphase.                                           |
| PREDICTED: similar to centrosome spindle pole associated protein | UPI0000D65<br>977 | R.TPYDDAY@YFYGAR.N                                                                                                                                                                                                                                                  | Y468                                                                                      |                                                                                                                                                                                                                                                                                                           |
| Platelet-activating factor acetylhydrolase 1B alpha subunit      | P63005            | R.SNGYEEAY@SVFKK.E                                                                                                                                                                                                                                                  | Y27                                                                                       | May participate in targeting cytoplasmic dynein to microtubule plus ends, thereby playing an essential role in dynein-mediated microtubule sliding. Non-catalytic subunit of a acetylhydrolase complex.                                                                                                   |
| RCC2 protein                                                     | Q8BK67            | R.VFSWFGGGY@GR.L                                                                                                                                                                                                                                                    | Y357                                                                                      | Contains 7 RCC1 repeats. Interacts with microtubules. Required for completion of mitosis and cytokinesis. May function as a guanine nucleotide exchange factor for RAC1.                                                                                                                                  |
| <b>CYTOSKELETON: OTHER</b>                                       |                   |                                                                                                                                                                                                                                                                     |                                                                                           |                                                                                                                                                                                                                                                                                                           |
| Plectin 1                                                        | Q6S394            | Y.VSSLY@DAMPRVPGAQDGVREL.Q<br>K.AVTGYRDPY@SGQSVSLFQALK.K<br>K.AVTGYRDPY@SGQSVSLFQALK.K.G<br>R.ARQEEVY@SELQAR.E<br><br>R.LTAEDLY@EAR.I<br>R.QQNLASY@DYVR.R<br>R.AVTGKDPY@SGK.L<br>R.LLEAAQSSKGY@YSPYSVSGSGTAGSR.T<br>K.GYSPY@S@VSGSGTAGSR.T<br>K.GYSPY@SVSGSGTAGSR.T | Y288<br>Y3134<br>Y3134<br>Y3250<br><br>Y3678<br>Y3665<br>Y4043<br>Y4499<br>Y4503<br>Y4503 | Plectins are long filamentous molecules (500 kDa) that cross-link microtubules to intermediate filaments and to actin microfilaments. All peptides identical in plectin isoforms 2, 3, 5, 6, 7, 8, 10, 11 (Respective UniProt refs.: Q6S393, Q6S392, Q6S390, Q6S389, Q6S388, Q6S387, Q6S385, and Q6S384). |
| Protein 4.1                                                      | P48193            | K.VSLDDTVY@EC*VVEK.H                                                                                                                                                                                                                                                | Y223                                                                                      | Major structural element of the erythrocyte membrane skeleton. Stabilizes spectrin-actin interaction.                                                                                                                                                                                                     |
| Spectrin beta chain, brain 1                                     | Q62261            | L.KIVSSNDVGHDEY@STQ.S                                                                                                                                                                                                                                               | Y777                                                                                      | Alternative Name: Fodrin beta chain.                                                                                                                                                                                                                                                                      |
| Vimentin                                                         | P20152            | R.TY@SLGSALRPSTSR.S<br>L.RPSTSRSLY@SSSPGGAY.V<br>R.SLY@SSS@PGGAYVTR.S<br>R.SLY@SSSPGGAYVTR.S<br>S.RSLY@SSSPGGAY.V<br>S.TSRSLY@SSSPGGAY.V                                                                                                                            | Y37<br>Y52<br>Y52<br>Y52<br>Y52                                                           | Vimentins are class-III intermediate filaments found in various non-epithelial cells, especially mesenchymal cells.                                                                                                                                                                                       |
| <b>TRAFFICKING/TRANSPORT</b>                                     |                   |                                                                                                                                                                                                                                                                     |                                                                                           |                                                                                                                                                                                                                                                                                                           |
| <b>Vesicle transport</b>                                         |                   |                                                                                                                                                                                                                                                                     |                                                                                           |                                                                                                                                                                                                                                                                                                           |
| Adapter-related protein complex 3 mu 1 subunit                   | Q9JKC8            | K.SVWSQSV*DY@FFEAQEK.A                                                                                                                                                                                                                                              | Y31                                                                                       | Part of the AP-3 adaptor-related complex which is not clathrin-associated. Facilitates budding of vesicles from the Golgi membrane and may be involved in trafficking to lysosomes.                                                                                                                       |
| Clathrin heavy chain                                             | Q68FD5            | R.ALEHFTDLY@DIKR.A<br>R.FLRENPY@YDSR.V                                                                                                                                                                                                                              | Y634<br>Y899                                                                              | Major component of the cytoplasmic face of coated vesicles and coated pits.                                                                                                                                                                                                                               |
| Coatamer protein complex subunit alpha                           | Q8BTF0            | R.VKGNVY@C*LDR.E                                                                                                                                                                                                                                                    | Y 579                                                                                     | The coatamer is a cytosolic protein complex that binds to dilysine motifs and reversibly associates with Golgi non-clathrin-coated vesicles, which further mediate biosynthetic protein transport from the ER, via the Golgi up to the trans Golgi network.                                               |
| Coatamer beta subunit                                            | Q9JIF7            | K.LVTEMGTY@ATQSALSSSRPTKK.E                                                                                                                                                                                                                                         | Y521                                                                                      |                                                                                                                                                                                                                                                                                                           |
| Coatamer beta' subunit                                           | O55029            | K.GVNC*IDYY@SGGDKPYLISGADDR.L                                                                                                                                                                                                                                       | Y194                                                                                      |                                                                                                                                                                                                                                                                                                           |
| HECT domain and RCC1-like domain-containing protein 2 -- Herc2   | Q4U2R1            | R.SRTPLDKDLINTGIY@ESSGK.Q<br>R.TPLDKDLINTGIY@ESSGK.Q                                                                                                                                                                                                                | Y999<br>Y999                                                                              | A very large protein implicated in protein trafficking. Contains 1 HECT (E6AP-type E3 ubiquitin-protein ligase) domain.                                                                                                                                                                                   |
| Intersectin 2                                                    | Q9Z0R6            | R.GEPEALY@AAVTK.K                                                                                                                                                                                                                                                   | Y 921                                                                                     | Adapter protein involved in the formation of clathrin-coated vesicles.                                                                                                                                                                                                                                    |
| Lysosomal trafficking regulator                                  | P97412            | R.AVWYDPIY@YPTSWQLDPTTEGPNR.E                                                                                                                                                                                                                                       | Y 2929                                                                                    | May be required for sorting endosomal resident proteins into late multivesicular endosomes by a mechanism involving microtubules.                                                                                                                                                                         |
| SEC24 related gene family, member B                              | Q80ZX0            | K.MTSLPLDSQC*DSY@YSRPTYVPTQNSGTPSSAN<br>QPGAQQMYGR.G<br>R.LDDRIVY@AMC*QMK.S                                                                                                                                                                                         | Y79<br>Y1083                                                                              | Component of the copii coat, that covers ER-derived vesicles involved in transport from the endoplasmic reticulum to the golgi apparatus.                                                                                                                                                                 |
| SH3-containing GRB2-like protein 1                               | Q62419            | K.ALY@DFEPENDGELGFR.E                                                                                                                                                                                                                                               | Y315                                                                                      | Belongs to the endophillin family. May play a regulatory role in synaptic vesicle recycling.                                                                                                                                                                                                              |
| Sorting nexin-9                                                  | Q91VH2            | K.IAIVGDY@GPMWVYPTSTFDC*VADPR.K<br>L.AKPKEKIAIVGDY@GPM#W<br>L.AKPKEKIAIVGDY@GPM.W                                                                                                                                                                                   | Y239<br>Y239<br>Y239                                                                      | Sorting nexins are characterized by a phox-homology domain, which mediates their association with phosphoinositides. Involved in membrane trafficking and sorting by binding to target proteins                                                                                                           |

|                                                         |        |                                                                                                                                                                                                                                                                                                            |                                                                                      |                                                                                                                                                                                                                                                                                                                                                                                                                                                                                                                                                                                                                                                                        |
|---------------------------------------------------------|--------|------------------------------------------------------------------------------------------------------------------------------------------------------------------------------------------------------------------------------------------------------------------------------------------------------------|--------------------------------------------------------------------------------------|------------------------------------------------------------------------------------------------------------------------------------------------------------------------------------------------------------------------------------------------------------------------------------------------------------------------------------------------------------------------------------------------------------------------------------------------------------------------------------------------------------------------------------------------------------------------------------------------------------------------------------------------------------------------|
| Sorting nexin 17                                        | Q8R0N8 | R.KSYWDSAY@DDVMENR.V                                                                                                                                                                                                                                                                                       | Y210                                                                                 | SNX17 enhances the endocytosis rate of the LDL receptor.                                                                                                                                                                                                                                                                                                                                                                                                                                                                                                                                                                                                               |
| Transitional endoplasmic reticulum ATPase -- TER ATPase | Q01853 | K.VVETDPSPY@C*IVAPDTVIHC*EGEPIKR.E<br>R.GILLY@GPPGTGK.T                                                                                                                                                                                                                                                    | Y172<br>Y243                                                                         | Alternative name: valosin-containing protein (VCP). Member of a family that includes putative ATP-binding proteins involved in vesicle transport and fusion, 26S proteasome function, and assembly of peroxisomes.                                                                                                                                                                                                                                                                                                                                                                                                                                                     |
| <b>Nucleocytoplasmic transport</b>                      |        |                                                                                                                                                                                                                                                                                                            |                                                                                      |                                                                                                                                                                                                                                                                                                                                                                                                                                                                                                                                                                                                                                                                        |
| GTP-binding nuclear protein Ran                         | P62827 | K.NLQY@YDISAK.S<br>R.KKNLQY@YDISAK.S<br>K.NLQYY@DISAK.S<br>K.SNY@NFEKPFLLAR.K                                                                                                                                                                                                                              | Y145<br>Y145<br>Y146<br>Y154                                                         | Small GTP binding protein belonging to the RAS superfamily that is essential for the translocation of RNA and proteins through the nuclear pore complex.                                                                                                                                                                                                                                                                                                                                                                                                                                                                                                               |
| Importin-9                                              | Q91YE6 | R.VKGEEIY@SMDEGIR.T                                                                                                                                                                                                                                                                                        | Y888                                                                                 | Functions in nuclear protein import as nuclear transport receptor. Serves as receptor for nuclear localization signals (NLS) in cargo substrates.                                                                                                                                                                                                                                                                                                                                                                                                                                                                                                                      |
| RAE1 RNA export 1 homolog                               | Q8C570 | R.SNGTNTSAPQDIY@AVNGIAHPVHGLTAVGSD<br>GR.F                                                                                                                                                                                                                                                                 | Y274                                                                                 | Thought to be involved in nucleocytoplasmic transport, and in directly or indirectly attaching cytoplasmic mRNPs to the cytoskeleton.                                                                                                                                                                                                                                                                                                                                                                                                                                                                                                                                  |
| Ran-binding protein 2                                   | Q9ERU9 | R.GDDY@FNYNVQQTSTNPPLPEPGYFTKPLVAHA<br>SR.S<br>K.EGPY@WNC*NSC*SFK.N                                                                                                                                                                                                                                        | Y960<br>Y1349                                                                        | Large RAN-binding nucleoporin located on the cytoplasmic side of the nuclear pore complex which plays a role in nuclear protein import.                                                                                                                                                                                                                                                                                                                                                                                                                                                                                                                                |
| <b>Other transport</b>                                  |        |                                                                                                                                                                                                                                                                                                            |                                                                                      |                                                                                                                                                                                                                                                                                                                                                                                                                                                                                                                                                                                                                                                                        |
| none                                                    |        |                                                                                                                                                                                                                                                                                                            |                                                                                      |                                                                                                                                                                                                                                                                                                                                                                                                                                                                                                                                                                                                                                                                        |
| <b>METABOLIC AND BIOSYNTHETIC ENZYMES</b>               |        |                                                                                                                                                                                                                                                                                                            |                                                                                      |                                                                                                                                                                                                                                                                                                                                                                                                                                                                                                                                                                                                                                                                        |
| <b>Glycolytic enzymes</b>                               |        |                                                                                                                                                                                                                                                                                                            |                                                                                      |                                                                                                                                                                                                                                                                                                                                                                                                                                                                                                                                                                                                                                                                        |
| Alpha enolase (beta-enolase) (gamma enolase)            | P17182 | R.GNPTVEVDLY@TAK.G<br>F.DSRGNPTVEVDLY@TAKGLF.R<br>F.DSRGNPTVEVDLY@TAKGLFR.A<br>F.RAAVPSGASTGIY@EAL.E<br>F.RAAVPSGASTGIY@EAL.L.R<br>R.AAVPSGASTGIY@EAL.L.R.D<br><br>F.RAAVPSGASTGIY@EAL.L.RDNDKTRF.M<br>R.AAVPSGASTGIY@EAL.L.RDNDK.T<br>R.IGAEVY@HNLK.N                                                     | Y24<br>Y24<br>Y24<br>Y43<br>Y43<br>Y43<br><br>Y43<br>Y43<br>Y188                     | Catalyzes the first common step of glycolysis and gluconeogenesis. Mammalian enolase is composed of 3 isozyme subunits, alpha, beta and gamma, which can form homodimers or heterodimers. This peptide also identical in gamma enolase (P17183).<br>Identical peptide in gamma enolase (P17183).<br>Identical peptide in gamma enolase (P17183).<br>Identical peptide in beta enolase (P21550); gamma enolase (P17183).<br>Identical peptide in beta enolase (P21550); gamma enolase (P17183).<br>Identical peptide in beta enolase (P21550); gamma enolase (P17183).<br><br>alpha enolase only.<br>alpha enolase only.<br>Identical peptide in beta enolase (P21550); |
| GAPDH: Glyceraldehyde-3-phosphate dehydrogenase         | P16858 | F.VKLISWYDNEY@GY.S<br>K.LISWYDNEY@GYSNR.V<br><br>L.ISWYDNEY@GY.S<br>L.ISWYDNEY@GYSNRVVDL.M                                                                                                                                                                                                                 | Y315<br>Y315<br><br>Y315<br>Y315                                                     | Second phase of glycolysis; first step.                                                                                                                                                                                                                                                                                                                                                                                                                                                                                                                                                                                                                                |
| L-lactate dehydrogenase A chain                         | P06151 | W.KEVHKQVVDAYS@EVIK.L                                                                                                                                                                                                                                                                                      | Y238                                                                                 | Anaerobic glycolysis; final step.                                                                                                                                                                                                                                                                                                                                                                                                                                                                                                                                                                                                                                      |
| 6-phosphofructokinase, liver type                       | P12382 | K.C*HEHYTTEFLY@NLYSSEGR.G                                                                                                                                                                                                                                                                                  | Y639                                                                                 | The rate-limiting enzyme of glycolysis.                                                                                                                                                                                                                                                                                                                                                                                                                                                                                                                                                                                                                                |
| Phosphoglycerate mutase 1                               | Q9DBJ1 | F.SGWY@DADLSPAGHEEAKRGGQAL.R<br>F.SGWY@DADLSPAGHEEAKRGGQ.A<br>R.FSGWY@DADLSPAGHEEAK.R<br><br>R.FSGWY@DADLSPAGHEEAKR.G                                                                                                                                                                                      | Y25<br>Y25<br>Y25<br><br>Y25                                                         | Functions in second phase of glycolysis.                                                                                                                                                                                                                                                                                                                                                                                                                                                                                                                                                                                                                               |
| Pyruvate kinase, isozyme M2                             | P52480 | R.EATESFASDPILY@RPVAVALDTK.G<br>R.EATESFASDPILY@RPVAVALDTKGPEIR.T<br>Y.HAETIKNVREATESFASDPILY@RPVAVAL.D<br>K.ITLDNAY@MEKC*DENILWLDYK.N<br>L.IAREAAIY@HLQL.F<br>L.IAREAAIY@HL.Q<br>L.IAREAAIY@HLQL.F.E<br>L.IAREAAIY@HLQLFEEL.R<br>M.QHLIAREAAIY@HLQLFEEL.R<br>R.EAAIY@HLQLFEEL.R.R<br>R.EAAIY@HLQLFEELRR.L | Y104<br>Y104<br>Y104<br>Y147<br>Y389<br>Y389<br>Y389<br>Y389<br>Y389<br>Y389<br>Y389 | Second phase of aerobic glycolysis; final step.                                                                                                                                                                                                                                                                                                                                                                                                                                                                                                                                                                                                                        |
| <b>Other metabolic/biosynthetic enzymes</b>             |        |                                                                                                                                                                                                                                                                                                            |                                                                                      |                                                                                                                                                                                                                                                                                                                                                                                                                                                                                                                                                                                                                                                                        |
| ADP/ATP translocase 2                                   | P51881 | R.AAYFGIY@DTAK.G                                                                                                                                                                                                                                                                                           | Y194                                                                                 | Belongs to the mitochondrial carrier family. Catalyzes the exchange of ADP and ATP across the mitochondrial inner membrane.                                                                                                                                                                                                                                                                                                                                                                                                                                                                                                                                            |
| ATP citrate lyase                                       | Q91V92 | R.TTDGVY@EGVAIGGDYRPGSTFMDHVL.R.Y<br>R.TTDGVY@EGVAIGGDYRPGSTFMDHVL.R.Y                                                                                                                                                                                                                                     | Y 672<br>Y 672                                                                       | The primary enzyme responsible for the synthesis of cytosolic acetyl-CoA and oxaloacetate, a key step for the biosynthesis of fatty acids, cholesterol, acetylcholine, as well as for gluconeogenesis.                                                                                                                                                                                                                                                                                                                                                                                                                                                                 |
| Aldo-keto reductase family 1 member C18                 | Q8K023 | K.IELNDGHSIPVLGFGTY@ATEEHLK.K                                                                                                                                                                                                                                                                              | Y24                                                                                  | Catalyzes the conversion of aldehydes and ketones to their corresponding alcohols by utilizing NADH and/or NADPH as cofactors.                                                                                                                                                                                                                                                                                                                                                                                                                                                                                                                                         |
| Aldo-keto reductase family 1, member B3                 | Q5U415 | R.HIDC*AQVY@QNEK.E<br>R.HIDC*AQVY@QNEKEVGVALQEK.L                                                                                                                                                                                                                                                          | Y49                                                                                  |                                                                                                                                                                                                                                                                                                                                                                                                                                                                                                                                                                                                                                                                        |



|                                                           |        |                                                                                                                                                                                                |                                                                          |                                                                                                                                                                                                                                                       |
|-----------------------------------------------------------|--------|------------------------------------------------------------------------------------------------------------------------------------------------------------------------------------------------|--------------------------------------------------------------------------|-------------------------------------------------------------------------------------------------------------------------------------------------------------------------------------------------------------------------------------------------------|
| Aldose reductase-related protein 2                        | P45377 | R.AC*LLPETVNMEEPYDAEY@-<br>W.RAC*LLPETVNMEEPYDAEY@-                                                                                                                                            | Y315<br>Y315                                                             |                                                                                                                                                                                                                                                       |
| Adenylosuccinate synthetase, non-muscle isozyme           | P46664 | K.DGVY@FLYEALHGPPK.K<br>K.DGVY@FLYEALHGPPK.I<br>K.DGVYFLY@EALHGPPK.I                                                                                                                           | Y236<br>Y236<br>Y239                                                     | Plays an important role in the de novo pathway of purine nucleotide biosynthesis.                                                                                                                                                                     |
| Bifunctional purine biosynthesis protein PURH             | Q9CWJ9 | L.SEDEARVC*MVY@DLYPTLTPLA<br>R.VC*M#VY@DLYPTLTPLAVAYAR.A<br><br>R.VC*MVY@DLYPTLTPLAVAYAR.A<br><br>R.VC*MVYDLY@PTLTPLAVAYAR.A                                                                   | Y290<br>Y290<br><br>Y290<br><br>Y293                                     | Involved in de novo purine biosynthesis.                                                                                                                                                                                                              |
| CTP synthase                                              | P70698 | Y.INIDAGTFSPY@EHGEVF.V                                                                                                                                                                         | Y53                                                                      | Catalyzes the ATP-dependent amination of UTP to CTP.                                                                                                                                                                                                  |
| Glycerol-3-phosphate dehydrogenase 2                      | Q8VDT0 | R.FLYY@EMGYK.S                                                                                                                                                                                 | Y601                                                                     | Functions in glycerol metabolism.                                                                                                                                                                                                                     |
| Glucose-6-phosphate 1-dehydrogenase X                     | Q00612 | R.NSYVAGQY@DDAASYK.H<br>R.VQPNEAVY@TK.M<br>L.VIRVQPNEAVY@TKM#M<br>L.VIRVQPNEAVY@TKM.M<br><br>L.VIRVQPNEAVY@TKMM.T<br><br>K.KPGMFFNPEEELDLTY@GNRYK.N<br>K.RVGFQYEGTY@K.W<br><br>R.VGFQYEGTY@K.W | Y111<br>Y400<br>Y400<br>Y400<br><br>Y400<br><br>Y423<br>Y506<br><br>Y506 | Pentose phosphate pathway; oxidative stage. A cytosolic enzyme whose main function is to produce NADPH.                                                                                                                                               |
| Inosine-5'-monophosphate dehydrogenase 2                  | P24547 | L.AATTEAPGEY@FFSDGIRL.K                                                                                                                                                                        | Y400                                                                     | Rate limiting enzyme in the de novo synthesis of guanine nucleotides.                                                                                                                                                                                 |
| Phosphoglucomutase 2                                      | Q5RJV4 | K.IALY@ETPTGWK.F                                                                                                                                                                               | Y353                                                                     | Glycogen metabolism.                                                                                                                                                                                                                                  |
| Ribonucleoside-diphosphate reductase large subunit        | P07742 | K.KVFSVDMEDLY@NYINPHNGR.H<br>K.KVFSVDM#EDLY@NYINPHNGR.H                                                                                                                                        | Y102<br>Y102                                                             | Catalyzes the biosynthesis of deoxyribonucleotides from the corresponding ribonucleotides.                                                                                                                                                            |
| Serine hydroxymethyltransferase, cytosolic                | P50431 | K.M#LSQPLKDSDAEVY@SIKK.E<br>K.MLSQPLKDSDAEVY@SIKK.E                                                                                                                                            | Y28<br>Y28                                                               | Interconversion of serine and glycine. Key enzyme in the biosynthesis of purines, lipids, hormones and other components.                                                                                                                              |
| S-adenosylhomocysteine hydrolase                          | Q5M9P0 | K.SKFDNLY@GC*R.E                                                                                                                                                                               | Y193                                                                     | Enzyme in the Activated Methyl Cycle, where the methyl group of methionine is activated by the formation of S-adenosylmethionine.                                                                                                                     |
| Thioredoxin reductase 1, cytoplasmic                      | Q9JMH6 | K.KVYENAY@GR.F<br><br>K.VVYENAY@GR.F                                                                                                                                                           | Y131<br><br>Y131                                                         | This protein reduces thioredoxins as well as other substrates, and plays a role in selenium metabolism and protection against oxidative stress.                                                                                                       |
| Thioredoxin reductase 1 [fragment]                        | Q3UEB7 | K.EVVYENAY@GR.F                                                                                                                                                                                | Y131                                                                     | A distinct peptide from Thioredoxin reductase 1, cytoplasmic (Q9JMH6).                                                                                                                                                                                |
| TK: Transketolase                                         | P40142 | K.NM#AEQIIQEIY@SQVQSK.K<br>K.NMAEQIIQEIY@SQVQSK.K                                                                                                                                              | Y275<br>Y275                                                             | Pentose phosphate pathway; non-oxidative stage.                                                                                                                                                                                                       |
| UDP-glucose 6-dehydrogenase                               | O70475 | R.INAWNSPTLPIY@EPGLK.E<br>R.INAWNSPTLPIY@EPGLKEVVESC*R.G                                                                                                                                       | Y53<br>Y53                                                               | Involved in biosynthesis of glycosaminoglycans; hyaluronan, chondroitin sulfate, and heparan sulfate.                                                                                                                                                 |
| <b>RNA SYNTHESIS AND PROCESSING</b>                       |        |                                                                                                                                                                                                |                                                                          |                                                                                                                                                                                                                                                       |
| <b>Transcription machinery and regulation</b>             |        |                                                                                                                                                                                                |                                                                          |                                                                                                                                                                                                                                                       |
| CCR4-NOT transcription complex subunit 2                  | Q8C5L3 | F.VEGVDSYHDENM#Y@Y.S<br>F.VEGVDSYHDENMY@Y.S<br>K.FVEGVDSYHDENM#Y@YSQSSMFPHR.S<br>K.FVEGVDSYHDENMY@YSQSSMFPHR.S<br>K.FVEGVDSYHDENMY@YSQSSMFPHR.S                                                | Y43<br>Y43<br>Y43<br>Y43<br>Y43                                          | The CCR4-NOT complex functions as general transcription regulation complex.                                                                                                                                                                           |
| DNA-directed RNA polymerase I 40 kDa polypeptide -- RPA40 | P52432 | R.NVHTTDFPGNY@AGYDDAWDQNRFEK.N                                                                                                                                                                 | Y33                                                                      | Catalyzes the transcription of DNA into RNA.<br>Has 3 Ct LIM domains. Site is in the first LIM domain. Interacts with pRB, inhibits E2F-mediated transcription, and suppresses the expression of the majority of genes with E2F1-responsive elements. |
| LIM domains containing protein 1 -- LIMD1                 | Q9QXD8 | K.VFC*EEDFLY@SGFQQSADR.C                                                                                                                                                                       | Y519                                                                     |                                                                                                                                                                                                                                                       |
| NF-kappa-B DNA binding subunit p105                       | P25799 | F.TRRLEPVVSDAIY@DSKAPNASNL.K<br>R.RLEPVVSDAIY@DSKAPNASNL.I                                                                                                                                     | Y238<br>Y238                                                             | Transcription regulator that is activated by various intra- and extra-cellular stimuli. Site in the Rel homology domain (RHD)                                                                                                                         |
| Polymerase I and transcript release factor -- PTRF        | O54724 | F.KVMYI@QDEVKLPACL.S<br>K.VMIY@QDEVKLPACL.L<br>R.KSFTPDHVVY@AR.S<br>K.SFTPDHVVY@AR.S                                                                                                           | Y158<br>Y158<br>Y310<br>Y310                                             | Required for dissociation of the ternary transcription complex.                                                                                                                                                                                       |
| Staphylococcal nuclease domain-containing protein 1       | Q78PY7 | R.ADDADEFY@SR.-                                                                                                                                                                                | Y908                                                                     | Transcriptional coactivator for STAT5 and STAT6. May function as a bridging factor between STAT6 and the basal transcription machinery.                                                                                                               |

|                                                                    |        |                                                                                                                                                                                                                                                                                                                                                                                                                  |                                                                                                                                   |                                                                                                                                                                                                                                                                                                                                                                                                                                                                                                                                                                                                                                                                                                               |
|--------------------------------------------------------------------|--------|------------------------------------------------------------------------------------------------------------------------------------------------------------------------------------------------------------------------------------------------------------------------------------------------------------------------------------------------------------------------------------------------------------------|-----------------------------------------------------------------------------------------------------------------------------------|---------------------------------------------------------------------------------------------------------------------------------------------------------------------------------------------------------------------------------------------------------------------------------------------------------------------------------------------------------------------------------------------------------------------------------------------------------------------------------------------------------------------------------------------------------------------------------------------------------------------------------------------------------------------------------------------------------------|
|                                                                    |        | R.YGDFRADADEFY@SR.-                                                                                                                                                                                                                                                                                                                                                                                              | Y908                                                                                                                              |                                                                                                                                                                                                                                                                                                                                                                                                                                                                                                                                                                                                                                                                                                               |
| Transcription initiation factor IIE alpha subunit                  | Q9D0D5 | R.FNEQIEPIY@ALLR.E                                                                                                                                                                                                                                                                                                                                                                                               | Y188                                                                                                                              | Recruits TFIIH to the initiation complex and stimulates the RNA polymerase II C-terminal domain kinase and DNA-dependent ATPase activities of TFIIH.                                                                                                                                                                                                                                                                                                                                                                                                                                                                                                                                                          |
| Transcription elongation factor SPT6                               | Q62383 | K.AAEDDELEEEADWIY@R.N                                                                                                                                                                                                                                                                                                                                                                                            | Y321                                                                                                                              | Acts to stimulate transcriptional elongation by RNA polymerase II.                                                                                                                                                                                                                                                                                                                                                                                                                                                                                                                                                                                                                                            |
| Tripartite motif protein 25                                        | Q61510 | K.FDTIY@QVLVK.K<br>R.VYGKFDTIY@QVLVK.K                                                                                                                                                                                                                                                                                                                                                                           | Y277<br>Y277                                                                                                                      | Transcription factor. Mediates estrogen action in various target organs. Contains one RING-type zinc finger and one SPRY domain.                                                                                                                                                                                                                                                                                                                                                                                                                                                                                                                                                                              |
| <b>DEAD(DEAH)-box helicases</b>                                    |        |                                                                                                                                                                                                                                                                                                                                                                                                                  |                                                                                                                                   |                                                                                                                                                                                                                                                                                                                                                                                                                                                                                                                                                                                                                                                                                                               |
| ATP-dependent RNA helicase DDX3X (DDX3Y) (PL10)                    | Q62167 | K.GFY@DKDSSGWSS@SKDKDAYSSFGSR.G<br><br>K.DKDAY@SSFGSR.D<br>W.SSSKDKDAY@SSF.G<br>R.FDDRGRGDY@DGIGGR.G<br>R.GDY@DGIGGR.G<br>R.GDY@DGIGGRGDR.S<br>R.GRGDY@DGIGGR.G<br><br>R.GRGDY@DGIGGRGDR.S<br>K.TAAFLLPILSIY@ADGPGEALR.A<br><br>L.VLAPTRELAVQIY@EEARKF.S<br>R.VRPC*VVY@GGAEIGQQIR.D<br>F.VETKKGADSLDFLY@HEGY.A<br><br>K.GADSLDFLY@HEGYAC*TSIHGDR.S<br>K.KGADSLDFLY@HEGYAC*TSIHGDR.S<br>L.VFVETKKGADSLDFLY@HEGY.A | Y52<br><br>Y68<br>Y68<br>Y103<br>Y103<br>Y103<br>Y103<br><br>Y103<br>Y242<br><br>Y282<br>Y300<br>Y461<br><br>Y461<br>Y461<br>Y461 | The DEAD(DEAH) box helicases are involved in various aspects of RNA metabolism, including nuclear transcription, pre mRNA splicing, ribosome biogenesis, nucleocytoplasmic transport, translation, RNA decay and organellar gene expression.<br><br>Peptide in DDX3Y (Q62095) and putative ATP-dependent RNA helicase PL10 ( P16381).<br><br>Peptide in DDX3Y (Q62095) and putative ATP-dependent RNA helicase PL10 (P16381).<br><br>Peptide in putative ATP-dependent RNA helicase PL10 ( P16381).<br><br>Peptide in putative ATP-dependent RNA helicase PL10 ( P16381).<br>Peptide in putative ATP-dependent RNA helicase PL10 ( P16381).<br>Peptide in putative ATP-dependent RNA helicase PL10 ( P16381). |
| Putative ATP-dependent RNA helicase DHX30                          | Q99PU8 | R.ENYLEENLY@APSLR.F                                                                                                                                                                                                                                                                                                                                                                                              | Y991                                                                                                                              |                                                                                                                                                                                                                                                                                                                                                                                                                                                                                                                                                                                                                                                                                                               |
| Probable ATP-dependent RNA helicase DDX6                           | P54823 | K.GVTQY@YAYVTER.Q                                                                                                                                                                                                                                                                                                                                                                                                | Y312                                                                                                                              |                                                                                                                                                                                                                                                                                                                                                                                                                                                                                                                                                                                                                                                                                                               |
| Putative pre-mRNA splicing factor ATP-dependent RNA helicase DHX15 | Q35286 | K.QNHESVQWC*Y@DNFINYR.S                                                                                                                                                                                                                                                                                                                                                                                          | Y645                                                                                                                              |                                                                                                                                                                                                                                                                                                                                                                                                                                                                                                                                                                                                                                                                                                               |
| Probable ATP-dependent RNA helicase DDX17 (DDX5)                   | Q501J6 | K.STC*Y@GGAPK.G<br>R.LKSTC*Y@GGAPK.G                                                                                                                                                                                                                                                                                                                                                                             | Y200<br>Y200                                                                                                                      | Peptide also in probable ATP-dependent RNA helicase DDX5 (Q61656).<br>Peptide also in probable ATP-dependent RNA helicase DDX5 (Q61656).                                                                                                                                                                                                                                                                                                                                                                                                                                                                                                                                                                      |
| Probable ATP-dependent RNA helicase DDX20 -- DEAD-box protein 20   | Q9JJY4 | R.VQSEPQEEESWY@DC*HR.E<br>R.AWQEQY@YAAASHSYWNAQR.H                                                                                                                                                                                                                                                                                                                                                               | Y757<br>Y788                                                                                                                      |                                                                                                                                                                                                                                                                                                                                                                                                                                                                                                                                                                                                                                                                                                               |
| Probable ATP-dependent helicase DDX48                              | Q91VC3 | K.GFKEQIY@DVYR.Y                                                                                                                                                                                                                                                                                                                                                                                                 | Y202                                                                                                                              |                                                                                                                                                                                                                                                                                                                                                                                                                                                                                                                                                                                                                                                                                                               |
| <b>hnRNPs and snRNPs</b>                                           |        |                                                                                                                                                                                                                                                                                                                                                                                                                  |                                                                                                                                   |                                                                                                                                                                                                                                                                                                                                                                                                                                                                                                                                                                                                                                                                                                               |
| Heterogeneous nuclear ribonucleoprotein A1                         | P49312 | F.GGRSSGPY@GGGGQY.F<br>R.SSGPYGGGGQY@FAKPR.N                                                                                                                                                                                                                                                                                                                                                                     | Y288<br>Y294                                                                                                                      |                                                                                                                                                                                                                                                                                                                                                                                                                                                                                                                                                                                                                                                                                                               |
| Heterogeneous nuclear ribonucleoprotein A3                         | Q8BG05 | Y.GGGYGSGGGSGGY@GSRRF.-                                                                                                                                                                                                                                                                                                                                                                                          | Y374                                                                                                                              |                                                                                                                                                                                                                                                                                                                                                                                                                                                                                                                                                                                                                                                                                                               |
| Heterogeneous nuclear ribonucleoprotein A/B                        | Q3TMZ8 | Y.GPGYGGYDYSY@GYY.G<br>Y.GYQQYGGYGGYDY@SPYGY.G                                                                                                                                                                                                                                                                                                                                                                   | Y291<br>Y288                                                                                                                      |                                                                                                                                                                                                                                                                                                                                                                                                                                                                                                                                                                                                                                                                                                               |
| Heterogeneous nuclear ribonucleoprotein F                          | Q9Z2X1 | K.ATENDIY@NFFSPLNPVR.V<br><br>R.DLSYC*LSGMY@DHR.Y                                                                                                                                                                                                                                                                                                                                                                | Y306<br><br>Y272                                                                                                                  |                                                                                                                                                                                                                                                                                                                                                                                                                                                                                                                                                                                                                                                                                                               |
| Heterogeneous nuclear ribonucleoprotein H1                         | Q811L7 | R.GAYGGYGGY@DDYNGYNDGYGFGSDRFGR.D<br>R.GAYGGYGGYDDY@NGYNDGYGFGSDRFGR.D<br>R.RGAYGGYGGYDDY@NGYNDGYGFGSDR.F<br>R.RGAYGGYGGYDDY@NGYNDGYGFGSDRFGR.D<br><br>R.GAYGGYGGYDDYNGY@NDGYGFGSDRFGR.D                                                                                                                                                                                                                         | Y243<br>Y246<br>Y246<br>Y246<br><br>Y249                                                                                          |                                                                                                                                                                                                                                                                                                                                                                                                                                                                                                                                                                                                                                                                                                               |
| Heterogeneous nuclear ribonucleoprotein H'                         | P70333 | R.GAYGGYGGY@DDYGGYNDGYGFGSDRFGR.D<br>R.GAYGGYGGYDDY@GGYNDGYGFGSDRFGR.D<br>R.RGAYGGYGGYDDY@GGYNDGYGFGSDR.F<br>R.RGAYGGYGGYDDY@GGYNDGYGFGSDRFGR.D<br><br>Y.GGGYGGYDDY@GGYNDGYGF.G<br>Y.GGGYGGYDDY@GGYNDGYGFGSDRF.G<br>R.ATENDIY@NFFSPLNPMR.V<br>Y.RATENDIY@NFFS                                                                                                                                                    | Y243<br>Y246<br>Y246<br>Y246<br><br>Y246<br>Y246<br>Y306<br>Y306                                                                  |                                                                                                                                                                                                                                                                                                                                                                                                                                                                                                                                                                                                                                                                                                               |
| Heterogeneous nuclear ribonucleoprotein L                          | Q8R081 | M.VKMAAAGGGGGGRY@Y.G                                                                                                                                                                                                                                                                                                                                                                                             | Y16                                                                                                                               |                                                                                                                                                                                                                                                                                                                                                                                                                                                                                                                                                                                                                                                                                                               |

|                                                                 |        |                                                                                                                                                              |                                                        |                                                                                                                                                                                                                                                 |
|-----------------------------------------------------------------|--------|--------------------------------------------------------------------------------------------------------------------------------------------------------------|--------------------------------------------------------|-------------------------------------------------------------------------------------------------------------------------------------------------------------------------------------------------------------------------------------------------|
| Heterogeneous nuclear ribonucleoprotein M                       | Q9D0E1 | N.RFEPY@SNPTKRY.R                                                                                                                                            | Y62                                                    |                                                                                                                                                                                                                                                 |
| Heterogeneous nuclear ribonucleoprotein Q                       | Q7TMK9 | Q.RQAAKNQMYDDYY@YY.G<br>R.GGYEDPY@YGYEDFQVGAR.G<br>Y.RGGYEDPY@YGY@EDFQVGAR.G<br>Y.RGGYEDPY@YGY@EDF.Q<br>Y.RGGYEDPY@YGYEDF.Q<br>Y.RGGYEDPY@YGYEDFQ.V          | Y432<br>Y485<br>Y485,Y488<br>Y485,Y488<br>Y485<br>Y485 |                                                                                                                                                                                                                                                 |
| Heterogeneous nuclear ribonucleoprotein R                       | Q8VHM5 | Y.RGGYEDPY@YGYDDGY.A                                                                                                                                         | Y489                                                   |                                                                                                                                                                                                                                                 |
| Heterogeneous nuclear ribonucleoprotein U                       | O88568 | K.NQSQGYNQWQQGQFWGQKPSQHYHQGY@Y.-                                                                                                                            | Y797                                                   |                                                                                                                                                                                                                                                 |
| Polypyrimidine tract binding protein                            | Q8R509 | Y.TSVAPVLRGQPNY@IQF.S                                                                                                                                        | Y126                                                   | Sequence is similar with Polypyrimidine tract-binding protein 1, score 90%.                                                                                                                                                                     |
| Polypyrimidine tract-binding protein 1 -- hnRNP                 | P17225 | R.GQPIY@IQFSNHK.E<br>Y.TSVAPVLRGQPIY@IQF.S                                                                                                                   | Y126<br>Y126                                           | Alternative Name: Heterogeneous nuclear ribonucleoprotein I, hnRNP I                                                                                                                                                                            |
| U1 small nuclear ribonucleoprotein 70 kDa                       | Q62376 | K.HHNQPY@C*GIAPYIR.E                                                                                                                                         | Y38                                                    |                                                                                                                                                                                                                                                 |
| U1 small nuclear ribonucleoprotein C                            | Q62241 | K.FYC*DYC*DTY@LTHDSPSVR.K                                                                                                                                    | Y12                                                    |                                                                                                                                                                                                                                                 |
| <b>Splicing factors</b>                                         |        |                                                                                                                                                              |                                                        |                                                                                                                                                                                                                                                 |
| Apoptosis-related RNA binding protein                           | Q9Z0H4 | K.ELFEPYGAIV@QINVLR.D                                                                                                                                        | Y67                                                    |                                                                                                                                                                                                                                                 |
| Crooked neck-like protein 1                                     | P63154 | R.KVQADDGSDAGWEEY@Y@DYIFPEDAANQPNLK.L<br>R.KVQADDGSDAGWEEY@YDYIFPEDAANQPNLK.L<br>R.KVQADDGSDAGWEEY@DYIFPEDAANQPNLK.L<br>R.RKVQADDGSDAGWEEY@DYIFPEDAANQPNLK.L | Y640,Y641<br>Y640<br>Y641<br>Y641                      | Contains 16 HAT repeats. Sites in the 15th HAT domain. Involved in pre-mRNA splicing.                                                                                                                                                           |
| RNA binding motif, single-stranded interacting protein 1        | Q91W59 | K.QQMYPQY@ATYYPQYLQAK.Q<br>W.KQMYPQY@ATY.Y<br>K.QQMYPQY@ATY@YYPQYLQAK.Q<br>K.QQM#YYPQYATY@YYPQYLQAK.Q<br>K.QQMYPQYATY@YYPQYLQAK.Q<br>L.HNGFYPSPY@SIATN.R     | Y13<br>Y13<br>Y13,Y16<br>Y16<br>Y16<br>Y272            |                                                                                                                                                                                                                                                 |
| Splicing factor, arginine/serine-rich 1                         | Q6PDM2 | F.VRKEDMTY@AVR.K                                                                                                                                             | Y169                                                   |                                                                                                                                                                                                                                                 |
| Splicing factor, arginine/serine-rich 3                         | P84104 | R.AFGY@YGPLR.S                                                                                                                                               | Y32                                                    |                                                                                                                                                                                                                                                 |
| Splicing factor 3b, subunit 4                                   | Q8QZY9 | F.IGNLDPEIDEKLLY@DTF.S                                                                                                                                       | Y117                                                   |                                                                                                                                                                                                                                                 |
| Splicing factor, arginine/serine-rich 5                         | O35326 | F.GFVFEFEDPRDADDAVY@ELDGKEL.C<br>R.GFGFVFEFEDPRDADDAVY@ELDGK.E<br>R.GFGFVFEFEDPRDADDAVY@ELDGKELC*SER.V                                                       | Y55<br>Y55<br>Y55                                      |                                                                                                                                                                                                                                                 |
| Arginine/serine-rich splicing factor 6                          | Q921K3 | K.NGYGFVEFEDSRDADDAVY@ELNSK.E<br>Y.GFVFEFEDSRDADDAVY@ELNSKEL.C                                                                                               | Y53<br>Y53                                             |                                                                                                                                                                                                                                                 |
| Splicing factor, arginine/serine-rich 9                         | Q9D0B0 | R.DAEDAIY@GR.N                                                                                                                                               | Y71                                                    |                                                                                                                                                                                                                                                 |
| Splicing factor, proline- and glutamine-rich                    | Q8VIJ6 | R.FAQHGTFEY@EYSQR.W                                                                                                                                          | Y480                                                   | Essential pre-mRNA splicing factor required early in spliceosome formation. Seems to also bind DNA.                                                                                                                                             |
| <b>Other RNA binding and processing</b>                         |        |                                                                                                                                                              |                                                        |                                                                                                                                                                                                                                                 |
| DAZ-associated protein 1                                        | Q9JII5 | L.AFPPPPSQAAPDMSKPPTAQPDFPY@GQY.G                                                                                                                            | Y346                                                   | RNA-binding protein, which may be required during spermatogenesis.                                                                                                                                                                              |
| Double-stranded RNA-binding protein Staufen homolog             | Q9Z108 | R.ELLY@GGTSPTAETILK.S<br>R.TRPSEQLY@YLSR.A                                                                                                                   | Y371<br>Y404                                           | May play a role in specific positioning of mRNAs at given sites in the cell by crosslinking cytoskeletal and RNA components, and in stimulating their translation at the site.                                                                  |
| ELAV-like protein 1                                             | P70372 | K.NMALLSGLY@HSPAR.R                                                                                                                                          | Y200                                                   | ELAV family proteins are implicated in mRNA stability and translatability, control of cytoplasmic mRNA stability mediated by AU-rich elements in 3'-UTR.                                                                                        |
| ELAV-like protein 2                                             | Q60899 | K.TNQAILSGLY@QSPNR.R                                                                                                                                         | Y219                                                   | Peptide identical in ELAV-like neuronal protein-3 (Q91X19).                                                                                                                                                                                     |
| Fragile X mental retardation syndrome related protein 1 homolog | Q61584 | K.EISEGDEVEVY@SR.A<br>K.EISEGDEVEVY@SR.A<br>L.KDPDSNPY@SLL.D                                                                                                 | Y68<br>Y68<br>Y506                                     | Human fragile X mental-retardation protein (FMRP) and the fragile X-related proteins 1 and 2 (FXR1P and FXR2P) form a gene family with functional similarities, such as RNA binding, polyribosomal association and nucleocytoplasmic shuttling. |

|                                                                 |                   |                                                                                                                                                                                           |                                                       |                                                                                                                                                                                                           |
|-----------------------------------------------------------------|-------------------|-------------------------------------------------------------------------------------------------------------------------------------------------------------------------------------------|-------------------------------------------------------|-----------------------------------------------------------------------------------------------------------------------------------------------------------------------------------------------------------|
| Fragile X mental retardation syndrome related protein 2 homolog | Q9WVR4            | R.LPPPADYNKEITEGDEVEVY@SR.A<br>L.KDPDSNPY@SLDSTSEPEPPVDSEPEPPASAR.R                                                                                                                       | Y78<br>Y520                                           |                                                                                                                                                                                                           |
| Insulin-like growth factor 2 mRNA-binding protein 2             | Q5SF07            | K.SGY@AFVDYDPQNWAIR.A                                                                                                                                                                     | Y40                                                   | Binds to the 5' untranslated region of IGF2 mRNAs. Binding is isoform-specific. May regulate translation of target mRNAs.                                                                                 |
| Insulin-like growth factor 2, binding protein 1                 | Q80US9            | K.SGY@AFVDC*PDEHWAMK.A                                                                                                                                                                    | Y39                                                   |                                                                                                                                                                                                           |
| Interleukin enhancer-binding factor 3                           | Q9Z1X4            | R.VLEC*LASGIVMPDGGSIY@DPC*EKEATDAIGHLD.R.Q                                                                                                                                                | Y292                                                  | May facilitate double-stranded RNA-regulated gene expression at the level of post-transcription. Can act as a translation inhibitory protein.                                                             |
| Matrin-3                                                        | Q8K310            | R.SATREPPY@RVPR.D<br>R.SQESGYY@DRMDYEDDRLR.D                                                                                                                                              | Y171<br>Y214                                          | Contains 1 matrin-type zinc finger, 2 RRM (RNA recognition motif) domains. May play a role in nuclear retention of defective RNAs.                                                                        |
| Polyadenylate-binding protein 1 -- PABP1 (PABC4)                | P29341            | Y.VGDLHPDVTEAM#LY@EKF.S<br>Y.VGDLHPDVTEAMLY@EKF.S<br>K.ALY@DTFSAFGNILSC*K.V                                                                                                               | Y28<br>Y28<br>Y116                                    | May be involved in cytoplasmic regulatory processes of mRNA metabolism. May be involved in translationally coupled mRNA turnover.<br>Identical peptide in poly A binding protein, cytoplasmic 4 (Q3UX16). |
| Poly(rC)-binding protein 2                                      | Q61990            | Y.TIQGQY@AIPQPDLTCL.H<br>Y.TIQGQY@AIPQPDLTCLHQLAM#.Q<br>Y.TIQGQY@AIPQPDLTCLHQLAM.Q                                                                                                        | Y232<br>Y232<br>Y232                                  | Single-stranded nucleic acid binding protein that binds preferentially to oligo dC. RNA binding protein.                                                                                                  |
| Poly(rC)-binding protein 3                                      | P57722            | K.PASTPVIFAGGQAYTIQGQY@AIPHPDLTK.L                                                                                                                                                        | Y201                                                  |                                                                                                                                                                                                           |
| Protein SMG7                                                    | Q5RJH6            | K.VPEFYWDSSY@SMADNR.A                                                                                                                                                                     | Y826                                                  | Plays a role in nonsense-mediated mRNA decay. Recruits RENT1 (see below) to cytoplasmic mRNA decay bodies.                                                                                                |
| Pumilio homolog 1                                               | Q80U78            | R.SQDDAMVDY@FFQR.Q                                                                                                                                                                        | Y83                                                   | Sequence-specific RNA-binding protein that regulates translation and mRNA stability by binding the 3' untranslated regions (UTRs) of mRNA targets.                                                        |
| Putative RNA-binding protein 3                                  | O89086            | R.YDSRPGGYGY@GYGR.S<br>R.YDSRPGGYGY@GR.S                                                                                                                                                  | Y124<br>Y126                                          |                                                                                                                                                                                                           |
| Ras-GTPase-activating protein binding protein 1 -- G3bp1        | P97855            | K.NSSYAHGGLDSNGKPADAVY@GQK.E                                                                                                                                                              | Y56                                                   | hnRNA-binding protein and an element of the Ras signal transduction pathway. These proteins have endoribonuclease activity and mediate RNA decay in response to growth factors.                           |
| Ras-GTPase-activating protein SH3-domain binding protein        | UPI0000D62<br>F64 | K.NSSYAHGGLDSNGKPADAVY@GKK.E                                                                                                                                                              | Y56                                                   |                                                                                                                                                                                                           |
| Ras-GTPase-activating protein binding protein 2                 | P97379            | R.NSSYVHGGVDASGKPQEAIVY@QNDIHHK.V<br>Y.VHGGVDASGKPQEAIVY@QNDIHHKVL.S                                                                                                                      | Y56<br>Y56                                            |                                                                                                                                                                                                           |
| Regulator of differentiation 1 -- Rod1                          | Q8BHD7            | R.SQPVY@IQYSNHR.E                                                                                                                                                                         | Y98                                                   | Contains 4 RRM (RNA recognition motif) domains. May play a role in regulation of differentiation. In vitro, binds RNA, preferentially to both poly(G) and poly(U).                                        |
| Regulator of nonsense transcripts 1 -- RENT1                    | Q9EPU0            | L.AELNFEDEEDTY@YTKDLPVHAC*.SY.C<br>L.AELNFEDEEDTY@YTKDLPVHAC*.S<br>L.LAELNFEDEEDTY@YTKDLPVHAC*.S<br>K.RFTAQGLPDLNHSQVY@AVK.T<br>R.FM#TTAMY@DAR.E<br>R.FMTTAMY@DAR.E<br>R.AYQHGGVTGLSQY@.- | Y108<br>Y108<br>Y108<br>Y472<br>Y930<br>Y930<br>Y1113 | Part of a post-splicing multiprotein complex involved in nonsense-mediated decay (NMD) of mRNAs containing premature stop codons.                                                                         |
| <b>PROTEIN SYNTHESIS AND PROCESSING</b>                         |                   |                                                                                                                                                                                           |                                                       |                                                                                                                                                                                                           |
| <b>tRNA synthetases</b>                                         |                   |                                                                                                                                                                                           |                                                       |                                                                                                                                                                                                           |
| Alanyl-tRNA synthetase                                          | Q8BGGQ7           | K.DNFWEMGDTGPC*GPC*SEIHY@DR.I                                                                                                                                                             | Y192                                                  |                                                                                                                                                                                                           |
| Arginyl-tRNA synthetase                                         | Q9D0I9            | K.SDGGYTY@DTSDLAAIK.Q                                                                                                                                                                     | Y384                                                  |                                                                                                                                                                                                           |
| Bifunctional aminoacyl-tRNA synthetase                          | Q8CGC7            | R.GFFIC*DQPYEPVSPY@SC*R.E<br>R.RGFFIC*DQPYEPVSPY@SC*R.E                                                                                                                                   | Y690<br>Y690                                          |                                                                                                                                                                                                           |
| Cysteinyl-tRNA synthetase                                       | Q9ER72            | K.VTWYC*C*GPTVY@DASHMGHAR.S                                                                                                                                                               | Y143                                                  |                                                                                                                                                                                                           |
| Histidyl-tRNA synthetase                                        | Q61035            | K.LIY@DLKDQGGELLSLR.Y<br>K.YGEDSKLIY@DLKDQGGELLSLR.Y<br>L.TGKYGEDSKLIY@DLKDQGGELLS                                                                                                        | Y115<br>Y115<br>Y115                                  |                                                                                                                                                                                                           |
| Isoleucine-tRNA synthetase                                      | Q6NXK4            | K.NNDLC*Y@WVPEFVR.E                                                                                                                                                                       | Y434                                                  |                                                                                                                                                                                                           |
| Ilysyl-tRNA synthetase                                          | Q8C292            | K.ITYHPDGPEGQAY@EVDFTPPFR.R<br>K.ITYHPDGPEGQAY@EVDFTPPFR.R.I                                                                                                                              | Y381<br>Y381                                          |                                                                                                                                                                                                           |
| Valyl-tRNA synthetase                                           | Q9Z1Q9            | R.LHEEGVIY@R.S                                                                                                                                                                            | Y468                                                  |                                                                                                                                                                                                           |
| <b>Translation machinery</b>                                    |                   |                                                                                                                                                                                           |                                                       |                                                                                                                                                                                                           |

|                                                                                                                                 |               |                                                                                                                                                                                    |                                                  |                                                                                                                                                                                                        |
|---------------------------------------------------------------------------------------------------------------------------------|---------------|------------------------------------------------------------------------------------------------------------------------------------------------------------------------------------|--------------------------------------------------|--------------------------------------------------------------------------------------------------------------------------------------------------------------------------------------------------------|
| 40S ribosomal protein S10                                                                                                       | P63325        | R.IAIY@ELLFK.E                                                                                                                                                                     | Y12                                              |                                                                                                                                                                                                        |
| 60S ribosomal protein L3                                                                                                        | P27659        | K.NNASTDY@DLSDK.S                                                                                                                                                                  | Y306                                             |                                                                                                                                                                                                        |
| 60S ribosomal protein L4                                                                                                        | Q9D8E6        | R.KLDELY@GTWR.K                                                                                                                                                                    | Y264                                             |                                                                                                                                                                                                        |
| mitochondrial ribosomal protein S27                                                                                             | UPI00001C5303 | F.VDNIASREDLDSA EY@YLYK<br>R.FVDNIASREDLDSA EY@YLYK.F<br>R.EDLDSA EY@YLYK.F                                                                                                        | Y90<br>Y90<br>Y90                                |                                                                                                                                                                                                        |
| Eukaryotic translation initiation factor 2A                                                                                     | Q640P8        | L.VIASTEVDKTGASY@YGEQTLH.Y<br>L.VIASTEVDKTGASY@YGEQTLH.Y<br>K.LISKPVASDSTY@FAWC*PDGEHILTATC*APR.L<br>K.PVASDSTY@FAWC*PDGEHILTATC*APR.L<br>L.ISKPVASDSTY@F.A<br>Y.KLISKPVASDSTY@F.A | Y250<br>Y250<br>Y362<br>Y362<br>Y362<br>Y362     |                                                                                                                                                                                                        |
| Eukaryotic translation initiation factor 3 subunit 1                                                                            | Q66JS6        | L.KATM#KDDLADY@GGYEGGYVQDYEDFM#.-<br>L.KATMKDDLADY@GGYEGGYVQDYEDFM#.-<br>L.KATMKDDLADY@GGYEGGYVQDYEDFM.-                                                                           | Y248<br>Y248<br>Y248                             | Eukaryotic translation initiation factor-3 (eIF3) is a multisubunit complex (~10 subunits) that binds to the 40S ribosomal subunit and promotes the binding of methionyl-tRNAi and mRNA.               |
| Eukaryotic translation initiation factor 3, subunit 7                                                                           | O70194        | R.NLAMEATY@INHNSFQQC*LR.M                                                                                                                                                          | Y317                                             |                                                                                                                                                                                                        |
| Eukaryotic translation initiation factor 3, subunit 8                                                                           | Q8R1B4        | F.DHKQGTY@GGY.F<br>F.DHKQGTY@GGY.F<br>L.GSLVENNERVFDHKQGTY@GGY.F<br>R.VFDHKQGTY@GGY.F.R                                                                                            | Y879<br>Y879<br>Y879<br>Y879                     |                                                                                                                                                                                                        |
| Eukaryotic translation initiation factor 3, subunit 9                                                                           | Q8JZQ9        | R.MTLDTLSIY@ETPSMGLLDKK.S                                                                                                                                                          | Y438                                             |                                                                                                                                                                                                        |
| Eukaryotic translation initiation factor 3 subunit 10                                                                           | P23116        | K.KQPALDVLV@DVMK.S<br>F.LEVGKKQPALDVLV@DVMK                                                                                                                                        | Y32<br>Y32                                       |                                                                                                                                                                                                        |
| Eukaryotic translation initiation factor 4 gamma 1                                                                              | Q6NZJ6        | Y.SASQGAY@YIPGQGRSTY.V                                                                                                                                                             | Y110                                             |                                                                                                                                                                                                        |
| Eukaryotic translation initiation factor 4B                                                                                     | Q8BGD9        | F.LGNLPY@DVTEDSIKDFR.R<br>K.SPPYTAFLGNLPY@DVTEDSIKDFR.G                                                                                                                            | Y105<br>Y105                                     |                                                                                                                                                                                                        |
| Eukaryotic initiation factor 4A-I                                                                                               | P60843        | K.VVMALGDY@MGASC*HAC*IGGTNVR.A<br>M.ALGDY@MGASC*H.A<br>R.GFKDQIY@DIFQK.L                                                                                                           | Y126<br>Y126<br>Y197                             |                                                                                                                                                                                                        |
| Eukaryotic translation initiation factor 4H                                                                                     | Q9WUK2        | R.AY@SSFGGGR.G<br>H.GSRSQKELPTEPPY@TAY.V<br>Q.KELPTEPPY@TAY.V<br>R.SQKELPTEPPYTAY@VGNLPFNTVQGDIDAIFK.D                                                                             | Y11<br>Y41<br>Y41<br>Y44                         |                                                                                                                                                                                                        |
| Elongation factor 1-alpha 1 -- eEF1A-1 (eEF1A-2)                                                                                | P10126        | K.STTTGHLIY@K.C<br>R.EHALLAY@TLGVK.Q                                                                                                                                               | Y29<br>Y141                                      | Promotes the GTP-dependent binding of aminoacyl-tRNA to the A-site of ribosomes during protein biosynthesis. Both peptides identical in eEF1A-2 (P62631; P27706).                                      |
| G1 to phase transition 2 (GSPT2)                                                                                                | Q9CY91        | K.TAGVKY@LIVLINK.M                                                                                                                                                                 | Y347                                             | GSPT2 is closely related to GSPT1. GSPT1 is a positive regulator of translational accuracy and, in a binary complex with eRF1 functions as a polypeptide chain release factor.                         |
| Laminin receptor 1 -- ribosomal protein SA                                                                                      | Q8BNL2        | R.ADHQPLTEASY@VNLPTIALC*NTDSPLR.Y                                                                                                                                                  | Y139                                             |                                                                                                                                                                                                        |
| 67 kDa polymerase-associated factor PAF67; Eukaryotic translation initiation factor 3 subunit 6-interacting protein -- Eif3s6ip | Q91YE4        | K.TVSDLIDQKVY@ELQASR.V<br>K.VY@ELQASR.V<br>Y.FHKTVSDLIDQKVY@EL.Q<br>R.VSSDVIDQKVY@EIQDIYENSWTK.L<br>R.QLEVY@TSGGDPEVAGEYGR.H<br>K.GDPQVYEELFSY@AC*PK.F<br>R.MQKGDQVYEELFSY@AC*PK.F | Y72<br>Y72<br>Y72<br>Y89<br>Y247<br>Y415<br>Y415 |                                                                                                                                                                                                        |
| <b>Post-translational modifiers</b>                                                                                             |               |                                                                                                                                                                                    |                                                  |                                                                                                                                                                                                        |
| N-terminal acetyltransferase complex ARD1 subunit homolog A                                                                     | Q9QY36        | F.QISEVEPKY@YADGEDAY.A<br>L.NFQISEVEPKY@YADGEDAY.A<br>K.YYADGEDAY@AMKR.D                                                                                                           | Y137<br>Y137<br>Y145                             | In complex with NARG1, displays alpha (N-terminal) acetyltransferase activity. Without NARG1, displays epsilon (internal) acetyltransferase activity towards HIF1A, thereby promoting its degradation. |
| Probable palmitoyltransferase ZDHHC8                                                                                            | Q5Y5T5        | L.RSQTDSLFGDSGVY@DTPSSY.S                                                                                                                                                          | Y576                                             | Putative palmitoyltransferase involved in glutamatergic transmission.                                                                                                                                  |
| Glutathione S-transferase P 1                                                                                                   | P19157        | K.YVTLIY@TNYENK.N<br>K.YVTLIY@TNYENKNDYVK.A                                                                                                                                        | Y108<br>Y108                                     | Conjugates reduced glutathione to a wide number of exogenous and endogenous hydrophobic electrophiles.                                                                                                 |
| <b>Chaperones and associated proteins</b>                                                                                       |               |                                                                                                                                                                                    |                                                  |                                                                                                                                                                                                        |

|                                                      |        |                                                                                                                                                                                                                                                        |                                                                     |                                                                                                                                                                                                                                          |
|------------------------------------------------------|--------|--------------------------------------------------------------------------------------------------------------------------------------------------------------------------------------------------------------------------------------------------------|---------------------------------------------------------------------|------------------------------------------------------------------------------------------------------------------------------------------------------------------------------------------------------------------------------------------|
| BAG-family molecular chaperone regulator-3           | Q9JLV1 | K.THYPAAQGEY@QPQQPVYHK.I<br>K.THYPAAQGEYQPQQPVY@HK.I<br>K.THYPAAQGEY@QPQQPVY@HK.I                                                                                                                                                                      | Y246<br>Y253<br>Y246.Y253                                           | Inhibits the chaperone activity of HSP70/HSC70 by promoting substrate release.                                                                                                                                                           |
| DnaJ homolog subfamily B member 4                    | Q9D832 | K.VSLEEIY@SGC*TK.R                                                                                                                                                                                                                                     | Y172                                                                |                                                                                                                                                                                                                                          |
| Heat shock 70 kDa protein 4                          | Q61316 | K.LKKEDIY@AVEIVGGATR.I<br>K.NAVEEYVY@EMRDKLSGEYEK.F                                                                                                                                                                                                    | Y336<br>Y627                                                        |                                                                                                                                                                                                                                          |
| Heat shock cognate 71 kDa protein                    | P63017 | R.MVQEAKEY@KAEDEKQR.D                                                                                                                                                                                                                                  | Y525                                                                |                                                                                                                                                                                                                                          |
| Heat shock protein 75 kDa, mitochondrial precursor   | Q9CQN1 | R.NIY@YLC*APNR.H                                                                                                                                                                                                                                       | Y500                                                                |                                                                                                                                                                                                                                          |
| Heat shock protein HSP 90-beta                       | P11499 | K.SIY@YITGESK.E                                                                                                                                                                                                                                        | Y483                                                                |                                                                                                                                                                                                                                          |
| Heat-shock protein 105 kDa                           | Q61699 | K.NAVEEC*VY@EFR.D<br>K.NAVEEC*VY@EFRDK.L                                                                                                                                                                                                               | Y644<br>Y644                                                        |                                                                                                                                                                                                                                          |
| T-complex protein 1, beta subunit                    | P80314 | F.INRQLIY@NYPEQLF.G<br>R.QLIY@NYPEQLFGAAGVMAIEHADFAGVER.L                                                                                                                                                                                              | Y296<br>Y296                                                        | Belongs to the TCP-1 chaperonin family.                                                                                                                                                                                                  |
| T-complex protein 1, theta subunit                   | P42932 | K.HFSGLEAVY@R.N                                                                                                                                                                                                                                        | Y29                                                                 | Belongs to the TCP-1 chaperonin family.                                                                                                                                                                                                  |
| <b>PROTEIN DEGRADATION</b>                           |        |                                                                                                                                                                                                                                                        |                                                                     |                                                                                                                                                                                                                                          |
| <b>Ubiquitin conjugation regulators</b>              |        |                                                                                                                                                                                                                                                        |                                                                     |                                                                                                                                                                                                                                          |
| Anaphase promoting complex subunit 2                 | Q8BZQ7 | K.VRDQQLIY@SAGVYR.L<br>K.VRDQQLIY@SAGVYR.LPK.N<br>R.DQQLIY@SAGVYR.L<br>R.DQQLIY@SAGVYR.LPK.N                                                                                                                                                           | Y825<br>Y825<br>Y825<br>Y825                                        | Belongs to the cullin family. Component of the anaphase promoting complex/cyclosome (APC/C), a cell cycle-regulated ubiquitin ligase that controls progression through mitosis and the G1 phase of the cell cycle.                       |
| CBL E3 ubiquitin protein ligase                      | P22682 | K.IKPSSSANAIY@SLAARPLMPK.L<br>K.PSSSANAIY@SLAARPLMPK.L                                                                                                                                                                                                 | Y672<br>Y672                                                        | Acts as an E3 ubiquitin-protein ligase.                                                                                                                                                                                                  |
| F-box-like/WD-repeat protein TBL1X                   | Q9QXE7 | K.HQEPVY@SVAFSPDGK.Y                                                                                                                                                                                                                                   | Y459                                                                | F-box-like protein involved in the recruitment of the ubiquitin/19S proteasome complex to nuclear receptor-regulated transcription units.                                                                                                |
| F-box-like/WD-repeat protein TBLR1                   | Q8BHJ5 | K.HQEPVY@SVAFSPDGR.Y                                                                                                                                                                                                                                   | Y446                                                                |                                                                                                                                                                                                                                          |
| HECT, UBA and WWE domain containing protein 1        | Q7TMY8 | R.EMFNPMY@ALFR.T                                                                                                                                                                                                                                       | Y4081                                                               | Alternative Name: E3 ubiquitin protein ligase URE-B1. Regulates apoptosis by catalyzing the polyubiquitination and degradation of MCL1. Also ubiquitinates the p53 tumor suppressor and core histones including H1, H2A, H2B, H3 and H4. |
| Ubiquitin conjugating enzyme 7 interacting protein 3 | Q9WUB0 | R.NSQEAEVAC*PFIDSTY@SC*PGK.L                                                                                                                                                                                                                           | Y318                                                                | Contains 1 ubiquitin-like domain, 1 RING-type zinc finger, 1 RanBP2-type zinc finger, 1 B box-type zinc finger. Might act as an E3 ubiquitin-protein ligase, or as part of the E3 complex.                                               |
| Ubiquitin-conjugating enzyme                         | O88738 | K.VIFVDDY@AVGC*R.K<br>K.VIFVDDY@AVGC*RK.D                                                                                                                                                                                                              | Y107<br>Y107                                                        | GENE NAME Bir6                                                                                                                                                                                                                           |
| Ubiquitin-conjugating enzyme E2O                     | Q6PCR9 | K.LRPSGDDVELIGEEEDVSVY@DIADHPDFR.F                                                                                                                                                                                                                     | Y412                                                                |                                                                                                                                                                                                                                          |
| Ubiquitin-protein ligase E3 Mdm2                     | P23804 | S.DEDDEVY@RVTVY@QTGESDTSFEGDPEISLA<br>DY.W                                                                                                                                                                                                             | Y279                                                                | Only the first Y in the peptide (Y274) is in Psite                                                                                                                                                                                       |
| <b>Proteasome components</b>                         |        |                                                                                                                                                                                                                                                        |                                                                     |                                                                                                                                                                                                                                          |
| 26S protease regulatory subunit S10B                 | P62334 | K.GC*LLY@GPPGTGK.T                                                                                                                                                                                                                                     | Y173                                                                | The 26S protease is involved in the ATP-dependent degradation of ubiquitinated proteins. Proteasome subunit p42; Proteasome 26S subunit ATPase 6. GENE NAME Psmc6.                                                                       |
| 26S protease regulatory subunit 8                    | P62196 | K.GVLLY@GPPGTGK.T                                                                                                                                                                                                                                      | Y189                                                                | Proteasome subunit p45, p45/SUG, Proteasome 26S subunit ATPase 5, mSUG1. GENE NAME Name: Psmc5                                                                                                                                           |
| 26S protease regulatory subunit 6B                   | P54775 | L.SFLGPEPEDLEDLY@SRY.K                                                                                                                                                                                                                                 | Y41                                                                 |                                                                                                                                                                                                                                          |
| 26S proteasome non-ATPase regulatory subunit 7       | P26516 | W.FLDHDYLENM#Y@GM#F.K<br>W.FLDHDYLENM#Y@GM#F.K<br>W.FLDHDYLENM#Y@GM#F.K                                                                                                                                                                                | Y79<br>Y79<br>Y79                                                   |                                                                                                                                                                                                                                          |
| Proteasome subunit alpha type 2 -- PSMA2             | P49722 | L.ATEKKQKSILY@DERSVH.K<br>H.IGLVY@SGM#GPDYRVL.V<br>H.IGLVY@SGM#GPDYRVL.V<br>H.KVEPITKHIGLVY@SGM#GPDYRVL.V<br>H.KVEPITKHIGLVY@SGM#GPDYRVL.V<br>K.HIGLVY@SGM#GPDYR.V<br><br>K.HIGLVY@SGM#GPDYRVL.V<br>K.HIGLVY@SGM#GPDYR.V<br><br>K.HIGLVY@SGM#GPDYRVL.V | Y56<br>Y75<br>Y75<br>Y75<br>Y75<br>Y75<br><br>Y75<br>Y75<br><br>Y75 | Proteasome component C3. PSMA2 may have a potential regulatory effect on another component(s) of the proteasome complex through its tyrosine phosphorylation.                                                                            |

|                                                      |                   |                                                                                                                                                                                                                                                                                                |                                                                                        |                                                                                                                                                                                                     |
|------------------------------------------------------|-------------------|------------------------------------------------------------------------------------------------------------------------------------------------------------------------------------------------------------------------------------------------------------------------------------------------|----------------------------------------------------------------------------------------|-----------------------------------------------------------------------------------------------------------------------------------------------------------------------------------------------------|
|                                                      |                   | L.VY@SGMGPDYRVL.V<br>K.LAQQYY@LVY@QEPIPTAQLVQR.V<br>K.LAQQYYLVY@QEPIPTAQLVQR.V<br><br>R.KLAQQYY@LVY@QEPIPTAQLVQR.V<br>R.KLAQQYYLVY@QEPIPTAQLVQR.V<br><br>Y.YLVY@QEPIPTAQL.V                                                                                                                    | Y75<br>Y97,Y100<br>Y100<br><br>Y97,Y100<br>Y100<br><br>Y100                            |                                                                                                                                                                                                     |
| Proteasome subunit alpha type 6                      | Q9QUM9            | Y.KC*DPAGYY@C*GF.K                                                                                                                                                                                                                                                                             | Y160                                                                                   |                                                                                                                                                                                                     |
| Proteasome subunit beta type 1                       | O09061            | K.GAVY@SFDPVGSYQR.D<br>K.DVFISAERDVY@TGDALR.I                                                                                                                                                                                                                                                  | Y149<br>Y215                                                                           |                                                                                                                                                                                                     |
| Proteasome subunit beta type 4 precursor             | P99026            | M.RVNDSTMLGASGDY@ADF.Q<br>R.VNDSTMLGASGDY@ADFQYLK.Q                                                                                                                                                                                                                                            | Y102<br>Y102                                                                           | Proteasomal protein of the T1B peptidase family.                                                                                                                                                    |
| Proteasome subunit beta type 5 precursor             | O55234            | K.RGPLY@YVDSEGNR.I<br><br>R.GPLY@YVDSEGNR.I<br>W.DKRGPLY@YVDSEGNRISGTAF.S<br>R.AIY@QATYR.D<br>R.DAYSGGAVNLY@HVR.E<br>R.DAYSGGAVNLY@HVREDGWIR.V                                                                                                                                                 | Y116<br><br>Y116<br>Y116<br>Y165<br>Y181<br>Y181                                       | Belongs to the peptidase T1B family.                                                                                                                                                                |
| Proteasome subunit beta type 7 precursor             | P70195            | L.VLGGVDVTGPHLY@SIYPHGSTDKLPY.V                                                                                                                                                                                                                                                                | Y154                                                                                   |                                                                                                                                                                                                     |
| <b>Other proteolytic regulators</b>                  |                   |                                                                                                                                                                                                                                                                                                |                                                                                        |                                                                                                                                                                                                     |
| Probable ubiquitin carboxyl-terminal hydrolase FAF-X | P70398            | K.VISSVSY@YTHR.H<br>F.NDY@FEFPRELMEPY.T<br>K.FNDY@FEFPR.E<br>K.FNDY@FEFPRELMEPYTVAGVAK.L<br>R.PY@T@GNPQYTY@NNWSPVQSNETSNGYFLER.S<br>R.RPYTGNPQY@TYNNWSPVQSNETSNGYFLER.S<br>R.RPYTGNPQYT@Y@NNWSPVQSNETSNGYFLER.S<br>R.RPYTGNPQYTY@NNWSPVQSNETSNGYFLER.S<br>R.RPYTGNPQYT*Y@NNWSPVQSNETSNGYFLER.S | Y367<br>Y1815<br>Y1815<br>Y1815<br><br>Y2431,Y2439<br>Y2437<br>Y2439<br>Y2439<br>Y2439 | Belongs to the peptidase C19 family. May function as a ubiquitin-protein or polyubiquitin hydrolase involved both in the processing of ubiquitin precursors and of ubiquitinated proteins.          |
| Prolyl endopeptidase                                 | Q9QUR6            | R.MTELY@DYPK.Y<br>R.MTELY@DYPKYS*HFK.K<br>Y.KERM#TELY@DYPKY.S<br>Y.KERMTELY@DYPKY.S                                                                                                                                                                                                            | Y71<br>Y71<br>Y71<br>Y71                                                               | Belongs to the peptidase S9A family. Cleaves peptide bonds on the C-terminal side of prolyl residues within peptides that are up to ~30 amino acids long.                                           |
| <b>NUCLEAR PROTEINS</b>                              |                   |                                                                                                                                                                                                                                                                                                |                                                                                        |                                                                                                                                                                                                     |
| Histone H2B type 1-B                                 | Q64475            | R.KESYSVYVY@K.V                                                                                                                                                                                                                                                                                | Y43                                                                                    |                                                                                                                                                                                                     |
| Histone H4                                           | P62806            | K.RISGLIY@EETRGVL.K<br>R.ISGLIY@EETR.G                                                                                                                                                                                                                                                         | Y51<br>Y51                                                                             |                                                                                                                                                                                                     |
| Nucleolar protein 10                                 | Q5RJG1            | K.MGIY@YIPVLGPAPR.W                                                                                                                                                                                                                                                                            | Y339                                                                                   | Contains 5 WD repeats. Site in 5th WD repeat.                                                                                                                                                       |
| Nucleolin                                            | P09405            | R.SVSLY@YTGEK.G                                                                                                                                                                                                                                                                                | Y464                                                                                   | Associated with intranucleolar chromatin and preribosomal particles. Induces chromatin decondensation by binding to histone H1.                                                                     |
| PREDICTED: scaffold attachment factor B              | UPI00001E3<br>C2C | R.RDDAY@WPEAK.R                                                                                                                                                                                                                                                                                | Y723                                                                                   | DNA binding protein                                                                                                                                                                                 |
| SET protein                                          | Q9EQU5            | F.YFDENPY@FENKVL.S<br>R.IDFYFDENPY@FENK.V<br>R.IDFYFDENPY@FENKVLK.E<br><br>Y.RIDFYFDENPY@FENKVL.S<br>Y.FDENPY@FENKVL.S                                                                                                                                                                         | Y145<br>Y145<br>Y145<br><br>Y145<br>Y145                                               | Multitasking protein, involved in apoptosis, transcription, nucleosome assembly and histone binding.                                                                                                |
| Structural maintenance of chromosome 3               | Q9CW03            | Y.IEERLHLEEEKEELAQY@QKW.D                                                                                                                                                                                                                                                                      | Y213                                                                                   | Central component of cohesin complex required for the cohesion of sister chromatids after DNA replication.                                                                                          |
| Telomerase-binding protein EST1A                     | P61406            | K.FQNSDNPY@YYPR.T                                                                                                                                                                                                                                                                              | Y507                                                                                   | Component of the telomerase ribonucleoprotein (RNP) complex that is essential for the replication of chromosome termini.                                                                            |
| Translin                                             | Q62348            | K.KVEEVY@DLSIR.G                                                                                                                                                                                                                                                                               | Y210                                                                                   | DNA-binding protein that specifically recognizes consensus sequences at the breakpoint junctions in chromosomal translocations, mostly involving immunoglobulin (Ig)/T-cell receptor gene segments. |
| <b>MISCELLANEOUS</b>                                 |                   |                                                                                                                                                                                                                                                                                                |                                                                                        |                                                                                                                                                                                                     |
| Catalase                                             | P24270            | K.GAGAFGY@FEVTHDITR.Y<br>K.LVNADGEAVY@C*K.F                                                                                                                                                                                                                                                    | Y83<br>Y230                                                                            | Occurs in almost all aerobically respiring organisms and serves to protect cells from the toxic effects of hydrogen peroxide. Peroxisomal.                                                          |
| DNA dC->dU editing enzyme APOBEC-3                   | Q99J72            | K.HLC*Y@YHR.M                                                                                                                                                                                                                                                                                  | Y255                                                                                   | Belongs to the cytidine and deoxycytidylate deaminase family. Mediates G-to-A hypermutation in newly synthesized HIV-1 viral DNA and is thus able to prevent HIV-1 infectivity in vitro.            |



|                                                                         |                   |                                                                                                                                                                                        |                                                                   |                                                                                                                                                                              |
|-------------------------------------------------------------------------|-------------------|----------------------------------------------------------------------------------------------------------------------------------------------------------------------------------------|-------------------------------------------------------------------|------------------------------------------------------------------------------------------------------------------------------------------------------------------------------|
|                                                                         |                   | R.VKHLC*Y@YHR.M<br>Y.NQRVKHLC*Y@Y.H<br>K.HLC*YY@HR.M<br>Y.NQRVKHLC*YY@.H                                                                                                               | Y255<br>Y255<br>Y256<br>Y256                                      |                                                                                                                                                                              |
| Pol polyprotein [Moloney murine leukemia virus (MoMLV); Mus musculus]   | P03355            | L.AAAY@QEQLDRPVVPHPY.R<br>H.PY@RVGDTVW.V<br>L.AAAY@QEQLDRPVVPHPY@RVGDTVW.V<br>L.AAAYQEQLDRPVVPHPY@RVGDTVW.V<br>Y.QEQLDRPVVPHPY@RVGDTVW.V<br>K.NLEPRWKGPY@TVL.L<br>R.WKGPY@TVLLTPTALK.V | Y1105<br>Y1118<br>Y1105,Y1118<br>Y1118<br>Y1118<br>Y1142<br>Y1142 |                                                                                                                                                                              |
| Serpin B6                                                               | Q60854            | K.FKLEENYMMNDALY@KLGMTDAFGGR.A<br>Y.NMNDALY@KLGMTDAF.G                                                                                                                                 | Y289<br>Y289                                                      | Placental thrombin inhibitor. Serine-type endopeptidase inhibitor activity.                                                                                                  |
| Voltage-dependent anion-selective channel protein 1                     | Q60932            | K.YRWTEY@GLTFTEK.W                                                                                                                                                                     | Y80                                                               | Forms a voltage-dependent anion channel through the mitochondrial outer membrane and also the plasma membrane.                                                               |
| <b>FUNCTION UNKNOWN OR UNCERTAIN</b>                                    |                   |                                                                                                                                                                                        |                                                                   |                                                                                                                                                                              |
| <b>Named proteins of unknown/uncertain function</b>                     |                   |                                                                                                                                                                                        |                                                                   |                                                                                                                                                                              |
| Ankyrin repeat domain-containing protein 25                             | Q8BX02            | L.HVPAPFFPGTPGQASPAAFPSKEPDPY@S@VETP<br>Y.GY.R<br>L.HVPAPFFPGTPGQASPAAFPSKEPDPY@SVETPY<br>G.Y.R                                                                                        | Y32<br>Y32                                                        | Contains 5 ANK repeats.                                                                                                                                                      |
| Anthrax toxin receptor 1 precursor                                      | Q9CZ52            | K.WPTVDASY@YGGR.G                                                                                                                                                                      | Y380                                                              |                                                                                                                                                                              |
| ApoA-I binding protein                                                  | Q8K4Z3            | K.KYQLNLPSPDTEC*VY@RLQ.-<br>K.YQLNLPSPDTEC*VY@RLQ.-<br>K.YQLNLPSPDTEC*VY@RLQ.-                                                                                                         | Y279<br>Y279<br>Y279                                              |                                                                                                                                                                              |
| Ataxin-2                                                                | O70305            | K.GLPQPTISFDGIY@ANVR.M<br>R.VALENDRSEEEKY@TAVQR.N<br>R.VALENDRS*EEEEKY@TAVQR.N                                                                                                         | Y233<br>Y440                                                      | Spinocerebellar ataxia type 2 protein homolog                                                                                                                                |
| Ataxin-2-like protein                                                   | Q7TQH0            | K.GPPQSPVFEVY@NNSR.M                                                                                                                                                                   | Y116                                                              |                                                                                                                                                                              |
| BAT2-ISO homolog [fragment] (Bat2d)                                     | Q8BMJ4            | R.M#MWGSDPY@HAEPQQAATPK.S<br>R.MM#WGSDDPY@HAEPQQAATPK.S<br>R.MMWGSDPY@HAEPQQAATPK.S                                                                                                    | Y788<br>Y788<br>Y788                                              | Unknown function. UPI0000511F95 is full length, 2718 aa. Q8BMJ4 is fragment, N terminal 1105 aa. Q3TLH4: 893 aa.                                                             |
| Carnitine deficiency-associated protein CDV3A (CDV3B)                   | Q920I4            | L.TTTRKTPQGPPEIY@SDTQFSLQ.S<br>R.KTPQGPPEIY@SDTQFSLQSTAK.H                                                                                                                             | Y213<br>Y213                                                      | Both peptides identical in Carnitine deficiency-associated protein CDV3B (Q920C7)                                                                                            |
| Centrosomal protein 170                                                 | UPI0000D62<br>DCC | K.HVEGQSAASEEALFPFC*REPSY@FEIPTK.E                                                                                                                                                     | Y240                                                              |                                                                                                                                                                              |
| DENN/MADD domain containing 2C                                          | Q6P9P8            | K.SLENIY@YEPEGQEC*GPSINPLPKPR.R                                                                                                                                                        | Y185                                                              |                                                                                                                                                                              |
| Dihydropyrimidinase-related protein 2                                   | O08553            | K.THNSALEY@NIFEGMEC*R.G                                                                                                                                                                | Y431                                                              | CRMP-2 (mouse) an enzyme with dihydropyrimidinase activity. Plays a role in RhoA-dependent signaling, through interaction with and regulation of Rho kinase.                 |
| Discoidin, CUB and LCCL domain containing protein 2 precursor -- DCBLD2 | Q91ZV3            | K.SAATPEELVY@QVPQSTQELSGAGR.D                                                                                                                                                          | Y744                                                              |                                                                                                                                                                              |
| Discs, large homolog 5                                                  | Q3UGX5            | Y.KEERDAVY@SEY.K                                                                                                                                                                       | Y429                                                              |                                                                                                                                                                              |
| Far upstream element binding protein 3 (FUSE binding protein 3) homolog | Q3TIX6            | K.IDSIPHLNNSPLVDPS@VY@GYGVQKRA                                                                                                                                                         | Y51                                                               | May interact with single-stranded DNA from the far-upstream element (FUSE). May activate gene expression.                                                                    |
| GPI-anchored protein p137 - p137GPI                                     | Q60865            | F.TAPRDY@SGY.Q                                                                                                                                                                         | Y609                                                              | Attached to the membrane by a GPI-anchor (Probable). May play a role in transporting nutrient from the gut lumen across the gutlining epithelial cell layer (By similarity). |
| Grb10 interacting GYF protein 2                                         | Q6Y7W8            | F.LKEVESPY@EVHDIY.T<br><br>F.LKEVESPY@EVHDIYTRAY.L                                                                                                                                     | Y1174<br><br>Y1174                                                | Gene Name: Tnrc15; trinucleotide repeat containing 15                                                                                                                        |
| High glucose-regulated protein 8                                        | Q8K325            | K.DGLNDDDFEPY@LSPQAR.P                                                                                                                                                                 | Y37                                                               | Similar to YTH domain protein 3 (below)                                                                                                                                      |
| Large proline-rich protein BAT2                                         | Q7TSC1            | K.KYSSLNLFDTY@KGK.S<br>K.YSSLNLFDTY@KGK.S<br><br>K.APPSTY@SGVFR.T<br>R.LKAPPSTY@SGVFR.T<br><br>R.IDLY@QQASPPDALR.W                                                                     | Y26<br>Y26<br><br>Y2098<br>Y2098<br><br>Y2110                     | May play a role in the regulation of pre-mRNA splicing. Unknown function.                                                                                                    |
| Leucine rich repeat (in FLII) interacting protein 2 (Lrrfp2) [fragment] | Q8C062            | R.DIY@DLKQIHDFVEGR.Y                                                                                                                                                                   | Y5                                                                | Full length: 504aa gi:51765208, no Uniprot number.                                                                                                                           |

|                                                                                             |                |                                                                                                                                                                                                                    |                                                               |                                                                                                                                                                                                                                                                        |
|---------------------------------------------------------------------------------------------|----------------|--------------------------------------------------------------------------------------------------------------------------------------------------------------------------------------------------------------------|---------------------------------------------------------------|------------------------------------------------------------------------------------------------------------------------------------------------------------------------------------------------------------------------------------------------------------------------|
| Mage-d2                                                                                     | Q99PB4         | R.VPNSNPPEY@EFFWGLR.S                                                                                                                                                                                              | Y439                                                          |                                                                                                                                                                                                                                                                        |
| Nsun2 protein                                                                               | Q91YX9         | R.LAQEGIY@TLYPFINSR.I                                                                                                                                                                                              | Y372                                                          | Myc-induced SUN domain containing protein. Sun domain found in tRNA and rRNA cytosine-C5-methylases                                                                                                                                                                    |
| OTU domain containing 4 protein -- Otud4; PREDICTED: HIV-1 induced protein HIN-1 isoform 1; | UPI0000218 B34 | K.DSSAMC*QSLLY@ELLYEK.V<br>R.ESY@YFGLSPEER.R<br>R.ESYY@FGLSPEER.R<br>R.LLY@EIQNR.D<br>R.LLY@EIQNRDEQAFALSSSSVSQSPSONSNAC*V<br>PR.K                                                                                 | Y169<br>Y436<br>Y437<br>Y458                                  | MKIAA1046 protein [fragment] (Q80TL3) represents part of the same protein. Contains OTU domain near N-terminus. Possible cysteine protease activity.                                                                                                                   |
| Pericentriolar material gene 1 protein [fragment]                                           | Q91Y51         | K.SNRVPS*ADGNY@RPLAK.T                                                                                                                                                                                             | Y961                                                          | Unknown function                                                                                                                                                                                                                                                       |
| Periodic tryptophan protein 1 homolog -- Pwp1                                               | Q9D6T6         | R.VTWNHFSPC*HFLASTDDGFVY@NLDAR.S                                                                                                                                                                                   | Y367                                                          | Belongs to the WD-repeat PWP1 family. Contains 5 WD40 repeats.                                                                                                                                                                                                         |
| Pleckstrin homology-like domain, family B, member 2 -- PHLDB2                               | Q8K1N2         | K.ADLDHY@TGRDSE.S<br>K.SHDSVY@FLGGLEGR.K<br>R.NKSHDSVY@FLGGLEGR.K                                                                                                                                                  | Y130<br>Y161<br>Y161                                          | Contains 1 PH domain.                                                                                                                                                                                                                                                  |
| Protein FAM51A1                                                                             | Q8BHE1         | R.LNDY@VNADHGLY@FNHR.R<br>R.LNDY@VNADHGLY@FNHRR.S<br>R.LNDYVNADHGLY@FNHR.R                                                                                                                                         | Y167,Y175<br>Y167,Y175<br>Y175                                |                                                                                                                                                                                                                                                                        |
| PYM protein                                                                                 | Q8CHP5         | R.VKEGYVPQEEVPVYENKY@VK.F                                                                                                                                                                                          | Y49                                                           |                                                                                                                                                                                                                                                                        |
| Suppression of tumorigenicity 5                                                             | Q924W7         | K.STLEENAY@EDIVGGLPKENPY@EDVDLK.N                                                                                                                                                                                  | Y485,Y498                                                     |                                                                                                                                                                                                                                                                        |
| SR-related CTD associated factor 6                                                          | Q8CGZ0         | R.NSEGWEQNGLY@EFFR.A                                                                                                                                                                                               | Y723                                                          | Calcium Homeostasis Endoplasmic Reticulum Protein (CHERP).                                                                                                                                                                                                             |
| Tanc2 protein [fragment]                                                                    | Q5EBP6         | K.TNNAQNGHLEDDY@YSPHGLANGSR.G                                                                                                                                                                                      | Y1349                                                         | TPR domain, ankyrin-repeat and coiled-coil-containing                                                                                                                                                                                                                  |
| Testis derived transcript                                                                   | Q921W7         | K.HTM#NEGEPAIY@AER.A<br>K.HTMNEGEPAIY@AER.A                                                                                                                                                                        | Y249<br>Y249                                                  | Function unknwn. Contains 3 Ct LIM domains. Caution - other proteins are also called "testin".                                                                                                                                                                         |
| Trinucleotide repeat containing 6b                                                          | Q6NVE4         | K.DLGTDDSGPY@FEK.G<br>K.DLGTDDSGPY@FEKGGSHGLFGNSTAQSR.G<br>K.GIQNDIPESDPY@VTPGSLVGGTTTSPIVTDHQL<br>LR.D                                                                                                            | Y1128<br>Y1128<br>Y1440                                       |                                                                                                                                                                                                                                                                        |
| Tripartite motif protein 16                                                                 | Q99PP9         | F.DC*KFSEPVY@AAF.W<br>K.FSEPVY@AAFWLSK.K                                                                                                                                                                           | Y523<br>Y523                                                  | Unknown function. Alternative Name: Ebbp, estrogen-responsive B box protein.                                                                                                                                                                                           |
| Tudor domain-containing protein 3                                                           | Q91W18         | L.SNIKPVQTEAWEEEGTY@DHTIEF.R                                                                                                                                                                                       | Y618                                                          | Unknown function.                                                                                                                                                                                                                                                      |
| Ubiquitin-associated protein 2 - UBAP2                                                      | Q91VX2         | R.LPMDY@YGIPFAAPTALASR.D<br>R.LPM#DY@YGIPFAAPTALASR.D<br>R.LPMDY@GIPFAAPTALASR.D<br>F.AAPTALASRDGNLANNPY@SGDVTKF.G<br>L.ASRDGNLANNPY@SGDVTKF.G<br>N.NPY@SGDVTKF.G<br>R.DGNLANNPY@SGDVTK.F<br>K.SQASKPTY@GSAPYWTN.- | Y853<br>Y853<br>Y854<br>Y876<br>Y876<br>Y876<br>Y876<br>Y1124 | Has an ubiquitin associated (UBA) domain, a common motif in some members of the ubiquitination pathway, UV excision repair proteins, and certain protein kinases. Unknown function.                                                                                    |
| Ubiquitin associated protein 2-like -- UBAP2L                                               | Q80X50         | Y.TSQNNAQGPLY@EQRSTQ.T<br>R.FPLDY@YSIPFPTPTPLTGR.D<br>R.DGLASNPY@SGDLTK.F<br>L.TGRDGLASNPY@SGDLTK.F                                                                                                                | Y612<br>Y854<br>Y878<br>Y878                                  | Alternative names: Nice-4 protein homolog, isoform 2 (Q8CIG7), Lingerer protein-2a (Q812D5); Lingerer protein-2b (Q812D4). Unknown function.                                                                                                                           |
| Yippee-like 5                                                                               | Q65Z92         | N.S@KLGWIY@EFATEDSQRY.K                                                                                                                                                                                            | Y84                                                           |                                                                                                                                                                                                                                                                        |
| YTH domain protein 3 -- Ythdf3                                                              | Q6NXJ8         | K.SVDYNAY@AGVWSQDKWK.G                                                                                                                                                                                             | Y488                                                          | Similar to high-glucose-regulated protein 8 (above).                                                                                                                                                                                                                   |
| Novel ZZ type zinc finger domain containing protein                                         | Q5SSH7         | K.WKDFELPGDPLY@YR.F<br>W.KDFELPGDPLY@Y.R                                                                                                                                                                           | Y2706<br>Y2706                                                | BLAST results: Mouse protein Zzeff appears to represent a shorter variant of the same protein - identity starting from residue 2227. Similarity to cullen-7 near N-terminus; regions of similarity to Herc2; a region similar to anaphase promoting complex subunit 10 |
| <b>Unnamed proteins of unknown/uncertain function</b>                                       |                |                                                                                                                                                                                                                    |                                                               |                                                                                                                                                                                                                                                                        |
| BC003940 protein [fragment]                                                                 | Q8QZS4         | R.FIY@EAWQGVVER.D                                                                                                                                                                                                  | Y70                                                           | No full length form found. Unknwn function.                                                                                                                                                                                                                            |
| BC053440 protein [fragment]                                                                 | Q8R2W2         | K.INDTMY@FAPSMK.D                                                                                                                                                                                                  | Y19                                                           | hypothetical NAF1/Proline-rich region profile/Serine-rich region profile containing protein                                                                                                                                                                            |
| Hypothetical ATP/GTP-binding site motif A homolog                                           | Q3UHH1         | L.HKTKEAAPVGEEDDYQAY@Y.L                                                                                                                                                                                           | Y729                                                          | No functional information.                                                                                                                                                                                                                                             |

|                                                                                                                                                                              |                   |                                                                                                                                                                                            |                                      |                                                                                                                     |
|------------------------------------------------------------------------------------------------------------------------------------------------------------------------------|-------------------|--------------------------------------------------------------------------------------------------------------------------------------------------------------------------------------------|--------------------------------------|---------------------------------------------------------------------------------------------------------------------|
| hypothetical ATP/GTP-binding site motif A (P-loop)/Zinc finger C-x8-C-x5-C-x3-H type containing protein                                                                      | Q9DBS7            | K.EAVY@SGVQSLR.S                                                                                                                                                                           | Y508                                 |                                                                                                                     |
| hypothetical Domain of unknown function DUF71 containing protein                                                                                                             | Q9CQ28            | R.VYTQC*EGDEVEDLY@ELLK.L                                                                                                                                                                   | Y97                                  |                                                                                                                     |
| hypothetical G-protein beta WD-40 repeat/Trp-Asp (WD) repeats profile/Trp-Asp (WD) repeats circular profile/Serine-rich region profile/WD40-like containing protein -- WDR70 | Q3TWF6            | K.AAEDNPY@WVSPAYSK.T                                                                                                                                                                       | Y621                                 |                                                                                                                     |
| hypothetical 5'3'-Exonuclease N- and I-domains containing protein                                                                                                            | Q8BM14            | R.LQENC*GANTSPLY@SFSDK.A                                                                                                                                                                   | Y747                                 |                                                                                                                     |
| DNA segment, Chr 5, ERATO Doi 585, expressed -- D5Ertd585e                                                                                                                   | Q6P1H6            | R.IREYLM#GHY@YVPLLR.A<br>R.IREYLMGHY@YVPLLR.A                                                                                                                                              | Y483<br>Y483                         |                                                                                                                     |
| hypothetical protein: E230015L20Rik protein                                                                                                                                  | Q8C304            | R.TNEI@YLDPDAPLSRPSTQDNQYQK.S                                                                                                                                                              | Y416                                 | Gene name: Cdc66, coiled-coil domain containing 66                                                                  |
| hypothetical protein LOC106840                                                                                                                                               | Q8C4B4            | K.PEDNVY@SIDFTR.F<br>R.VTENYLC*KPEDNVY@SIDFTR.F                                                                                                                                            | Y92<br>Y92                           | Related to Unc-119 protein homolog. Peptide also in hypothetical protein (Q8BRC4). N terminal 120 aa are identical. |
| PREDICTED: zinc finger protein 650                                                                                                                                           | UPI0000D65<br>C57 | K.KLPIAEEEEQIY@PWDTC*AAVHDVRL                                                                                                                                                              | Y335                                 |                                                                                                                     |
| PREDICTED: similar to Oligophrenin 1                                                                                                                                         | UPI0000D66<br>8EB | K.LWLEAMDGKEPIY@TLPAlISK.K<br>R.KLWLEAM#DGKEPIY@TLPAlISK.K<br>R.KLWLEAMDGKEPIY@TLPAlISK.K                                                                                                  | Y371<br>Y371<br>Y371                 |                                                                                                                     |
| PREDICTED: similar to ring finger and KH domain containing 2                                                                                                                 | UPI0000428<br>93E | R.LSEQGGDFGY@SGYLFPGYGVGK.Q                                                                                                                                                                | Y188                                 |                                                                                                                     |
| hypothetical protein 1500002O20Rik                                                                                                                                           | Q9DB90            | K.EGQRPTQPVY@QIQNR.G                                                                                                                                                                       | Y147                                 |                                                                                                                     |
| MKIAA0183 protein [fragment]                                                                                                                                                 | Q6A0A9            | K.PAVPQVPSPGGTPGQAPY@SLSEPALTLDTSG<br>K.N<br>K.PAVPQVPS@PGGTPGQAPY@SLSEPALTLDTSG<br>GK.N<br>K.PAVPQVPSPGGT@PGQAPY@SLSEPALTLDTSG<br>GK.N<br>F.GGHY@GETVATGPY@RAF.R<br>F.GGHYGETVATGPY@RAF.R | Y457<br>Y457<br>Y457<br>Y968<br>Y968 | Upstream site Y959 found only once.                                                                                 |
| Protein FAM125A                                                                                                                                                              | Q78HU3            | R.RTDSIY@EASS@LYGISAMDGVFTLHPR.F                                                                                                                                                           | Y202                                 |                                                                                                                     |
| PREDICTED: similar to la related protein isoform 1                                                                                                                           | UPI0000D66<br>C58 | R.THFYQFGY@R.K                                                                                                                                                                             | Y412                                 | Contains LA ribonucleoprotein domain                                                                                |
| Similar to leucine-rich neuronal protein homolog                                                                                                                             | Q3U222            | L.GFGSC*HEELY@SGRPY.G                                                                                                                                                                      | Y203                                 |                                                                                                                     |
| Similar to RIKEN cDNA 4930527D15 gene [fragment]                                                                                                                             | Q922B5            | K.EKLLLC*HGPS@LSLPALSGVRY@NAEK.K                                                                                                                                                           | Y39                                  | DUF572 domain                                                                                                       |

**END**

**Footnotes:**

**a** The protein name is typically taken from the UniProt entry. Additional proteins (in parentheses) indicates ambiguity due to peptides being found in multiple related proteins. If a peptide is not unambiguously identified, additional relevant information is given in the Comments column. The UniProt ID #, indicates the UniProt Knowledgebase ID number representing the latest annotation update for the protein at the time of analysis.

**b** Peptides are shown in single letter amino acid code, with periods indicating cleavage sites. Y@, phosphotyrosine; S@, phosphoserine; T@, phosphothreonine; S<sup>+</sup> and T<sup>+</sup>, phosphoserine and phosphothreonine detected through neutral loss of phosphoric acid; C\*, carboxymethylated cysteine; M#, oxidated methionine. In the pY site column, the position of the phosphotyrosine site is based on the sequence of the given UniProt entry.

**c** The Novel column indicates whether or not the phosphotyrosine site has been previously recognized in either UniProt or PhosphoSite entries. N with an asterisk indicates that the site is represented in PhosphoSite as an unpublished site.

**d** The Com/Uncom column indicates whether the site was also found in the other cell population analyzed in this study.

**e** The "Rounds found" column indicates which of the 18 independent rounds of analysis the peptide was identified. Rounds 1-5, trypsin cleavage with affinity purification using antibody pY100. 6-10, trypsin cleavage with affinity purification using antibody 4G10. 11-14, chymotrypsin cleavage with affinity purification using pY100. 15-18, chymotrypsin cleavage with affinity purification using 4G10.

**f** "Total IDs" indicates number of independent spectra (combined from the indicated rounds) for which the indicated peptide was top-scoring. "Site count" indicates total number of times the indicated site was identified from all peptides.

**g** Cross-correlation score (xcorr) and charge (z) of the peptide. For peptides identified multiple times, the highest xcorr value is listed.

**h** Experimental mass of a singly charged peptide (MH) and the difference of the experimental from the calculated mass (dM), for the peptide with the highest xcorr value.

**i** If the delta correlation (dCn) score for the second-ranking peptide is < 0.2, these are shown.

**j** Short notes of interest.
