# Supplementary material
Source: PubMed Central journal article supplement (PMC2579752)
Supplement: NIHMS60500-supplement-Table_S3.pdf [file NIHMS60500-supplement-Table_S3.pdf]

**Table S3. SILAC-based quantification of pTyr peptides recovered from nontransformed vs. Src-transformed cells**

| Protein name                                                                         | UniProt # | pY site | Peptide                   | Ratio (H/L) <sup>a</sup> |
|--------------------------------------------------------------------------------------|-----------|---------|---------------------------|--------------------------|
| Src                                                                                  | Q80XU2    | Y418    | LIEDNEY@TAR               | 32                       |
|                                                                                      |           | Y438    | WTAPEAALY@GR              | H only                   |
| p190RhoGAP                                                                           | Q91YM2    | Y943    | NEEENIY@SVPHDSTQGK        | 2.8                      |
| RIN1                                                                                 | Q921Q7    | Y35     | EKPSTDPLY@DTPDTR          | 5.0                      |
| p130cas                                                                              | Q61140    | Y253    | HLLAPGPQDIY@DVPPVR        | 4.0                      |
| Talin 1                                                                              | P26039    | Y26     | TMQFEPSTMVY@DAC*R         | 6.2                      |
|                                                                                      |           | Y70     | ALDY@YMLR                 | 6.5                      |
| VASP                                                                                 | P70460    | Y39     | VQIY@HNPTANSFR            | 9.0                      |
| p120ctn                                                                              | P30999    | Y96     | LNGPQDHNHLLY@STIPR        | 10.5                     |
| Alpha enolase                                                                        | P17182    | Y43     | AAVPSGASTGIY@EALELR       | H only                   |
|                                                                                      |           |         | AAVPSGASTGIY@EALELRDNDKTR | 8.9                      |
| GAPDH                                                                                | P16858    | Y315    | LISWYDNEY@GYSNR           | 12.5                     |
| eEF1A-1                                                                              | P10126    | Y29     | STTTGHLIY@K               | 9.0                      |
| CDK1                                                                                 | P11440    | Y15     | IEKIGEGTY@GVVYK           | 0.51                     |
|                                                                                      |           |         | IGEGTY@GVVYK              | 0.55                     |
| GSK-3                                                                                | Q9WV60    | Y216    | GEPNVSY@IC*SR             | 1.11                     |
| Vimentin                                                                             | P20152    | Y52     | SLY@SSSPGGAYVTR           | H only                   |
| Proteasome subunit alpha type 2 -- PSMA2                                             | P49722    | Y56     | SILY@DER                  | 5.8                      |
|                                                                                      |           | Y75     | HIGLVY@SGMGPDYR           | 6.4                      |
| Heat shock protein HSP 90-beta                                                       | P11499    | Y483    | SIY@YITGESK               | 5.5                      |
| Eukaryotic translation initiation factor 3 subunit 6-interacting protein -- Eif3s6ip | Q91YE4    | Y72     | TVSDLIDQKVY@ELQASR        | 12.3                     |
| Thioredoxin reductase 1, cytoplasmic                                                 | Q9JMH6    | Y131    | KVYENAY@GR                | H only                   |
|                                                                                      |           |         | VVYENAY@GR                | H only                   |
| Eukaryotic translation initiation factor 3, subunit 8                                | Q8R1B4    | Y879    | GGTY@GGYFR                | 26.7                     |
|                                                                                      |           |         | VFDHKQGTY@GGYFR           | 10                       |
| Polymerase I and transcript release factor -- PTRF                                   | O54724    | Y310    | KSFTPDHVY@AR              | 85                       |
|                                                                                      |           |         | SFTPDHVY@AR               | 6.8                      |
|                                                                                      |           | Y158    | VMIY@QDEVKLPK             | 2                        |
| Histone H4                                                                           | P62806    | Y51     | ISGLIY@EETR               | 12.4                     |
| Plectin 1                                                                            | Q6S394    | Y3250   | ARQEEVY@SELQAR            | H only                   |
| Glucose-6-phosphate 1-dehydrogenase X                                                | Q00612    | Y400    | VQPNEAVY@TK               | 35                       |
| Actin, alpha skeletal muscle (Beta-actin) (Gamma-actin)                              | P68134    | Y93     | IWHHTFY@NELR              | 6.7                      |
| Regulator of nonsense transcripts 1 -- RENT1                                         | Q9EPU0    | Y930    | FMTTAMY@DAR               | 14.8                     |
| Proteasome subunit beta type 5 precursor                                             | O55234    | Y165    | AIY@QATYR                 | H only                   |

Number of identifications in label-free analysis<sup>b</sup>

| nontransformed |       | Src-transformed |       |
|----------------|-------|-----------------|-------|
| peptide        | total | peptide         | total |
| 11             | 11    | 20              | 27    |
| 0              | 0     | 9               | 21    |
| 28             | 28    | 20              | 20    |
| 4              | 4     | 4               | 4     |
| 31             | 32    | 10              | 10    |
| 5              | 8     | 10              | 11    |
| 5              | 12    | 9               | 9     |
| 4              | 5     | 5               | 7     |
| 12             | 12    | 15              | 15    |
| 6              | 6     | 51              | 81    |
| 0              |       | 0               |       |
| 8              | 8     | 34              | 41    |
| 11             | 11    | 18              | 18    |
| 7              | 132   | 0               | 9     |
| 39             |       | 8               |       |
| 25             | 92    | 2               | 5     |
| 2              | 2     | 11              | 17    |
| 0              | 0     | 0               | 1     |
| 1              | 1     | 24              | 72    |
| 2              | 2     | 11              | 11    |
| 0              | 0     | 23              | 27    |
| 0              | 0     | 9               | 15    |
| 0              |       | 6               |       |
| 0              | 0     | 0               | 14    |
| 0              |       | 1               |       |
| 2              | 7     | 2               | 3     |
| 3              |       | 1               |       |
| 1              | 3     | 1               | 2     |
| 0              | 0     | 11              | 12    |
| 0              | 0     | 17              | 17    |
| 0              | 0     | 2               | 14    |
| 3              | 3     | 12              | 12    |
| 0              | 0     | 7               | 7     |
| 0              | 0     | 7               | 7     |

|                                                                                            |               |       |                  |        |
|--------------------------------------------------------------------------------------------|---------------|-------|------------------|--------|
| OTU domain containing 4 protein -- Otud4; PREDICTED: HIV-1 induced protein HIN-1 isoform 1 | UPI0000218B34 | Y458  | LLY@EIQNR        | 11.5   |
| Double-stranded RNA-binding protein Staufen homolog                                        | Q9Z108        | Y404  | TRPSEQLY@YLSR    | H only |
| Prolyl endopeptidase                                                                       | Q9QUR6        | Y71   | MTELY@DYPK       | 8.8    |
| Clathrin heavy chain                                                                       | Q68FD5        | Y899  | FLRENPY@YDSR     | H only |
| Anaphase promoting complex subunit 2                                                       | Q8BZQ7        | Y825  | DQQLIY@SAGVYRLPK | H only |
| Ubiquitin associated protein 2-like -- UBAP2L                                              | Q80X50        | Y878  | DGSLASNPY@SGDLTK | 12.9   |
| Splicing factor, arginine/serine-rich 3                                                    | P84104        | Y32   | AFGY@YGPLR       | 3.9    |
| Annexin A2                                                                                 | P07356        | Y237  | SYSPY@DMLESIKK   | 10.0   |
| Alpha-1 catenin                                                                            | P26231        | Y619  | LVY@DGIR         | 8.0    |
|                                                                                            |               |       | LVY@DGIRDIR      | 9.9    |
| Tight junction protein ZO-1                                                                | P39447        | Y1521 | TITPVY@NR        | 7.2    |
| Elongation complex protein 3                                                               | Q9CZX0        | Y329  | GTGLY@ELWK       | H only |
| DNA damage-binding protein 1                                                               | Q9QYK0        | Y718  | TVPLY@ESPR       | 5.1    |
| U1 snRNP 70 kDa                                                                            | Q62376        | Y126  | EFEVY@GPIKR      | H only |

|   |   |    |    |
|---|---|----|----|
| 0 | 0 | 10 | 16 |
| 0 | 0 | 18 | 18 |
| 1 | 1 | 7  | 14 |
| 0 | 0 | 5  | 5  |
| 0 | 0 | 10 | 30 |
| 0 | 0 | 9  | 16 |
| 0 | 0 | 8  | 8  |
| 0 | 0 | 9  | 10 |
| 0 | 0 | 0  | 0  |
| 0 | 0 | 0  | 0  |
| 0 | 0 | 0  | 0  |
| 0 | 0 | 0  | 0  |
| 0 | 0 | 0  | 0  |

**Footnotes:**

**a** Nontransformed cells were grown in regular DMEM and Src-transformed cells were adapted for growth in DMEM containing "heavy" amino acids 13C6-arginine and 13C6-lysine. The heavy/light ratio (H/L) indicates the fraction of a given pTyr-containing peptide in the Src-transformed cell population relative to the same peptide in the nontransformed cells. "H only", indicates the peptide peak was clearly evident only in the Src-transformed cells.

**b** Shown for comparison are the numbers of times the specific peptides were identified and the total pTyr site identifications from the label-free analysis.
